# Supplementary material for: HISLAMPA: Hispanorum Index Scriptorum Latinorum Medii Posteriorique Aeui = Autores latinos peninsulares da época dos descobrimentos, 1350-1560
Source: Royal Society of Chemistry journal article supplement (doi:10.1039/c6ob01413e), 1993-01-01

# ***General Synthesis of P-Stereogenic Compounds: The Menthyl Phosphinate Approach.***

Olivier Berger and Jean-Luc Montchamp\*

Department of Chemistry, Box 298860, Texas Christian University, Fort Worth, Texas 76129

| List of contents:                      | Page |
|----------------------------------------|------|
| General Chemistry                      | S2   |
| Reagents and solvents                  | S2   |
| <sup>31</sup> P NMR Yield Measurements | S2   |
| Procedures and spectral data           | S2   |
| References                             | S31  |
| Spectra                                | S32  |

### **General Chemistry:**

$^1\text{H}$  NMR spectra were recorded on a 300 or 400-MHz spectrometer. Chemical shift for  $^1\text{H}$  NMR spectra (in parts per million) relative to internal tetramethylsilane ( $\text{Me}_4\text{Si}$ ,  $\delta = 0.00$  ppm) with  $\text{CDCl}_3$ .  $^{13}\text{C}$  NMR spectra were recorded at 75.5 or 101 MHz. Chemical shifts for  $^{13}\text{C}$  NMR spectra are reported (in parts per million) relative to  $\text{CDCl}_3$  ( $\delta = 77.0$  ppm).  $^{31}\text{P}$  NMR spectra were recorded at 121.5 or 162 MHz, and chemical shifts reported (in parts per million) relative to external 85% phosphoric acid ( $\delta = 0.0$  ppm). TLC plates were visualized by UV or immersion in permanganate potassium (3 g  $\text{KMnO}_4$ , 20 g  $\text{K}_2\text{CO}_3$ , 5 mL 5%  $\text{NaOH}$  aq and 300 mL of water) followed by heating.

### **Reagent and solvents:**

All starting materials were purchased from commercial sources and used as received. The solvents were distilled under  $\text{N}_2$  and dried according to standard procedures (THF from  $\text{Na}$ / benzophenone ketyl; DMF from  $\text{MgSO}_4$ ;  $\text{CH}_3\text{CN}$ , toluene and dichloromethane from  $\text{CaH}_2$ ).

### **$^{31}\text{P}$ NMR Yield Measurements:**

The NMR yields are determined by integration of all the resonances in the  $^{31}\text{P}$  spectra, an approach which is valid if no phosphorus-containing gas (i.e.  $\text{PH}_3$ ) evolves, or if the precipitate in a heterogeneous mixture does not contain phosphorus. The yields determined by NMR are generally accurate within  $\sim 10\%$  of the value indicated, and are reproducible.

### ***(R<sub>p</sub>)-Menthyl (hydroxymethyl)-H-phosphinate 2:<sup>1</sup>***

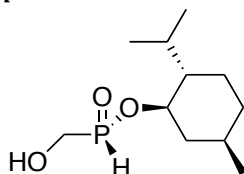

Paraformaldehyde (9.91 g, 330 mmol, 1.1 equiv) and hypophosphorous acid (39.6 g, 300 mmol, 1 equiv, 50% w.t. in water) were introduced in a round bottom flask and the reaction mixture was stirred for 24h at 75°C. The reaction mixture was cooled down to rt and the oil obtained was diluted in toluene (300 mL). L-menthol (46.9 g, 300 mmol, 1 equiv) was added and the reaction mixture was stirred for 24h at reflux under  $\text{N}_2$  in a flask equipped with a Dean-Stark trap. The solvent was then removed under vacuum and the residue obtained was dissolved in a mixture of diethyl ether/hexane (50 mL: 200 mL) and the flask was placed in the fridge for 4h (2°C). The solid obtained was filtered and solubilized in diethyl ether (200 mL) and placed in the fridge (2°C) for 3h to afford the product as white needles (6.54 g, 10%, >99% de). Mp = 101-102°C;  $^{31}\text{P}$  NMR (162 MHz,  $\text{CDCl}_3$ ):  $\delta = 34.9$  (dm,  $J = 542$  Hz);  $^1\text{H}$  NMR (400 MHz,  $\text{CDCl}_3$ ):  $\delta = 7.16$  (dm,  $J = 542$  Hz, 1H), 4.04-4.23 (m, 2H), 3.82-4.00 (m, 2H), 2.14-2.24 (m, 1H), 1.98-2.11 (m, 1H), 2.04 (dq,  $J = 2.4$  and 7.0 Hz, 1H), 1.62-1.73 (m, 2H), 1.34-1.52 (m, 2H), 1.24 (q,  $J = 12.0$  Hz, 1H), 0.93 (d,  $J = 6.7$  Hz, 6H), 0.76-1.10 (m, 2H), 0.80 (d,  $J = 7.0$  Hz, 3H);  $^{13}\text{C}$  NMR (101 MHz,  $\text{CDCl}_3$ ):  $\delta = 79.3$  (d,  $J_{\text{POC}} = 8.3$  Hz), 59.7 (d,  $J_{\text{PC}} = 111$  Hz), 48.5 (d,  $J_{\text{POCC}} = 5.5$  Hz), 43.3, 33.8, 31.5, 25.6, 22.9, 21.8, 20.8, 15.7; HRMS (ESI+)  $m/z$  calcd for  $\text{C}_{11}\text{H}_{23}\text{O}_3\text{P}$  ( $[\text{M}+\text{Na}]^+$ ) 257.1385, found 257.1423;  $[\alpha]_{\text{D}}^{22} = -61.4^\circ$  (chloroform).

### ***(S<sub>p</sub>)-Menthyl (hydroxymethyl)phenylphosphinate 3:<sup>1</sup>***

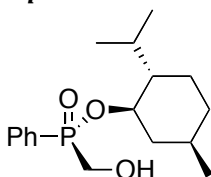

To a solution of phenylphosphinic acid (42.6 g, 300 mmol, 1 equiv) in toluene (300 mL) was added L-menthol (46.9 g, 300 mmol, 1 equiv). The reaction mixture was stirred at reflux for 24 h under  $\text{N}_2$  in a

flask equipped with a Dean-stark trap. After cooling down the reaction to rt, paraformaldehyde (9.01 g, 300 mmol, 1 equiv) was added and the reaction mixture was stirred at reflux for 24 h under N<sub>2</sub>. The solvent was then removed under vacuum and the crude obtained was recrystallized at rt in diethyl ether (200 mL) to afford the product as colorless crystals (24.2 g, 26%, 97% de). Mp = 138-139°C; <sup>31</sup>P NMR (162 MHz, CDCl<sub>3</sub>): δ = 37.2 (s); <sup>1</sup>H NMR (400 MHz, CDCl<sub>3</sub>): δ = 7.77-7.87 (m, 2H), 7.52-7.60 (m, 1H), 7.42-7.51 (m, 2H), 4.29-4.43 (m, 2H), 3.93-4.10 (m, 2H), 2.26 (dq, *J* = 2.6 and 7.0 Hz, 1H), 1.80-1.91 (m, 1H), 1.57-1.73 (m, 2H), 1.26-1.47 (m, 2H), 0.96 (d, *J* = 7.1 Hz, 3H), 0.74-1.13 (m, 3H), 0.89 (d, *J* = 7.0 Hz, 3H), 0.78 (d, *J* = 6.4 Hz, 3H); <sup>13</sup>C NMR (101 MHz, CDCl<sub>3</sub>): δ = 132.3 (d, *J*<sub>PCCC</sub> = 2.8 Hz), 131.7 (d, *J*<sub>PCCC</sub> = 9.9 Hz, 2C), 130.6 (d, *J*<sub>PC</sub> = 123 Hz), 128.3 (d, *J*<sub>PCC</sub> = 12.1 Hz, 2C), 77.1 (d, *J*<sub>POC</sub> = 8.3 Hz), 60.2 (d, *J*<sub>PC</sub> = 117 Hz), 48.7 (d, *J*<sub>POCC</sub> = 6.1 Hz), 43.2, 34.0, 31.4, 25.5, 22.8, 21.9, 21.1, 15.7; HRMS (EI+) *m/z* calcd for C<sub>16</sub>H<sub>28</sub>O<sub>3</sub>P [(M+H)<sup>+</sup>] 311.1776, found 311.1766; [α]<sub>D</sub><sup>22</sup> = -46.7° (chloroform).

**(*R<sub>p</sub>*)-Menthyl cinnamyl(hydroxymethyl)phosphinate 4:1**

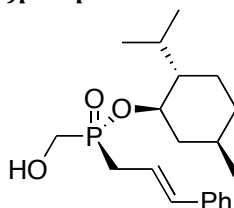

To a solution of cinnamylphosphinic acid (9.11 g, 50 mmol, 1 equiv) in toluene (100 mL) was added L-menthol (7.81 g, 50 mmol, 1 equiv). The reaction mixture was stirred at reflux for 24 h under N<sub>2</sub> in a flask equipped with a Dean-Stark trap. After cooling down the reaction to rt, paraformaldehyde (1.5 g, 50 mmol, 1 equiv) was added and the reaction mixture was stirred at reflux for 24 h under N<sub>2</sub>. The solvent was then removed under vacuum and the crude obtained was recrystallized at rt in a mixture ethyl acetate/diethyl ether (30 mL : 150 mL) to afford the product as a white solid (5.6 g, 32%, > 99% de). Mp = 145-146°C; <sup>31</sup>P NMR (162 MHz, CDCl<sub>3</sub>): δ = 48.8 (s); <sup>1</sup>H NMR (400 MHz, CDCl<sub>3</sub>): δ = 7.19-7.39 (m, 5H), 6.55 (dd, *J* = 4.7 and 15.8 Hz, 1H), 6.12-6.27 (m, 1H), 4.20-4.34 (m, 1H), 3.87 (s, 2H), 3.64 (s, 1H), 2.85 (dd, *J* = 7.6 and 17.6 Hz, 2H), 2.06-2.22 (m, 2H), 1.60-1.71 (m, 2H), 1.28-1.54 (m, 2H), 1.15 (q, *J* = 11.7 Hz, 1H), 0.74-1.07 (m, 2H), 0.91 (d, *J* = 6.4 Hz, 3H), 0.86 (d, *J* = 6.8 Hz, 3H), 0.77 (d, *J* = 7.0 Hz, 3H); <sup>13</sup>C NMR (101 MHz, CDCl<sub>3</sub>): δ = 136.8 (d, *J*<sub>PCCC</sub> = 3.3 Hz), 135.0 (d, *J*<sub>PCC</sub> = 12.2 Hz), 128.5 (2C), 127.5, 126.2 (d, *J*<sub>PCCCC</sub> = 1.7 Hz, 2C), 118.4 (d, *J*<sub>PCCC</sub> = 10.5 Hz), 76.7 (d, *J*<sub>POC</sub> = 8.3 Hz), 59.5 (d, *J*<sub>PC</sub> = 106 Hz), 48.6 (d, *J*<sub>POCC</sub> = 5.6 Hz, 2C), 43.5, 34.0, 31.6 (d, *J*<sub>PC</sub> = 87.3 Hz), 31.5, 25.5, 22.7, 22.1, 21.0, 15.5; HRMS (EI+) *m/z* calcd for C<sub>20</sub>H<sub>31</sub>O<sub>3</sub>P [(M)<sup>+</sup>] 350.2011, found 350.2012; [α]<sub>D</sub><sup>24</sup> = -51.6° (chloroform).

**(*R<sub>p</sub>*)-Menthyl (hydroxymethyl)phenylphosphinate 3:1**

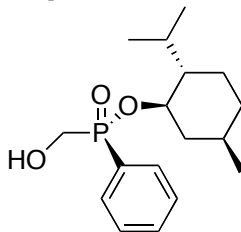

In a round bottom flask was introduced (*R<sub>p</sub>*)-2 (117 mg, 0.5 mmol, 1 equiv), Pd(OAc)<sub>2</sub> (2.3 mg, 0.01 mmol, 2.0 mol %), xantphos (6.4 mg, 0.011 mmol, 2.2 mol %), a mixture of DMF and 1,2-dimethoxyethane (2.25 mL : 0.25 mL), DIPEA (0.11 mL, 0.65 mmol, 1.3 equiv) and bromobenzene (0.05 mL, 0.5 mmol, 1 equiv). The reaction mixture was stirred under a flow of N<sub>2</sub> for 10 minutes and then heated at 115°C for 24 hours before cooling down to rt. The solvent was then removed under vacuum and the resulting residue was dissolved in ethyl acetate and washed with a saturated aqueous solution of NaHCO<sub>3</sub> and brine. The organic layer was dried over MgSO<sub>4</sub>, filtered and concentrated under vacuum. The crude obtained was purified by column chromatography (hexane/ethyl acetate 5:5 to 3:7) to afford the product as a white solid (106 mg, 68%, de = 95%). Mp

= 103-105°C; <sup>31</sup>P NMR (162 MHz, CDCl<sub>3</sub>): δ = 37.4 (s); <sup>1</sup>H NMR (400 MHz, CDCl<sub>3</sub>): δ = 7.80-7.91 (m, 2H), 7.45-7.62 (m, 3H), 4.09-4.21 (m, 1H), 4.02-4.08 (m, 2H), 2.77-2.87 (m, 1H), 2.29-2.39 (m, 1H), 1.90-2.05 (m, 1H), 1.58-1.69 (m, 3H), 1.22-1.50 (m, 2H), 0.93 (d, *J* = 6.2 Hz, 3H), 0.85 (d, *J* = 7.0 Hz, 3H), 0.76-1.02 (m, 2H), 0.47 (d, *J* = 7.0 Hz, 3H); <sup>13</sup>C NMR (101 MHz, CDCl<sub>3</sub>): δ = 132.3 (d, *J*<sub>PCCC</sub> = 2.7 Hz), 131.8 (d, *J*<sub>PCCC</sub> = 9.9 Hz, 2C), 129.4 (d, *J*<sub>PC</sub> = 124 Hz), 128.4 (d, *J*<sub>PCC</sub> = 12.1 Hz, 2C), 77.4 (d, *J*<sub>POC</sub> = 8.3 Hz), 60.4 (d, *J*<sub>PC</sub> = 115 Hz), 48.6 (d, *J*<sub>POCC</sub> = 6.0 Hz), 43.6, 34.0, 31.5, 25.4, 22.6, 22.0, 21.0, 15.2; HRMS (EI+) *m/z* calcd for C<sub>17</sub>H<sub>27</sub>O<sub>3</sub>P ([M+H]<sup>+</sup>) 311.1776, found 311.1773; [α]<sub>D</sub><sup>22</sup> = -37.9° (chloroform).

**(*R<sub>p</sub>*)-Menthyl (hydroxymethyl)-1-naphthylphosphinate 5:1**

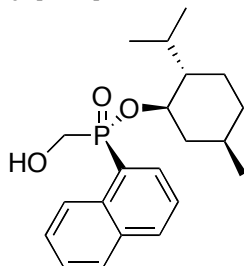

In a round bottom flask was introduced (*R<sub>p</sub>*)-2 (117 mg, 0.5 mmol, 1 equiv), Pd(OAc)<sub>2</sub> (2.3 mg, 0.01 mmol, 2.0 mol %), xantphos (6.4 mg, 0.011 mmol, 2.2 mol %), a mixture of DMF and 1,2-dimethoxyethane (2.25 mL : 0.25 mL), DIPEA (0.11 mL, 0.65 mmol, 1.3 equiv) and 1-bromonaphthalene (0.06 mL, 0.5 mmol, 1 equiv). The reaction mixture was stirred under a flow of N<sub>2</sub> for 10 minutes and then heated at 115°C for 24 hours before cooling down to rt. The solvent was then removed under vacuum and the resulting residue was dissolved in ethyl acetate and washed with a saturated aqueous solution of NaHCO<sub>3</sub> and brine. The organic layer was dried over MgSO<sub>4</sub>, filtered and concentrated under vacuum. The crude obtained was purified by column chromatography (hexane/ethyl acetate 5:5 to 0:10) to afford the product as a white solid (152 mg, 84%, 94% de). Mp = 102-103°C; <sup>31</sup>P NMR (162 MHz, CDCl<sub>3</sub>): δ = 38.6 (s); <sup>1</sup>H NMR (400 MHz, CDCl<sub>3</sub>): δ = 8.54-8.60 (m, 1H), 8.20-8.30 (m, 1H), 8.03-8.10 (m, 1H), 7.88-7.96 (m, 1H), 7.52-7.64 (m, 3H), 4.29-4.43 (m, 1H), 4.08-4.27 (m, 2H), 2.35-2.44 (m, 1H), 1.88-2.00 (m, 1H), 1.59-1.74 (m, 3H), 1.35-1.54 (m, 3H), 0.96 (d, *J* = 6.2 Hz, 3H), 0.84-1.04 (m, 2H), 0.74 (d, *J* = 7.0 Hz, 3H), 0.44 (d, *J* = 6.8 Hz, 3H); <sup>13</sup>C NMR (101 MHz, CDCl<sub>3</sub>): δ = 134.3 (d, *J*<sub>PCCC</sub> = 7.7 Hz), 133.6 (d, *J*<sub>PCCC</sub> = 9.4 Hz), 133.5 (d, *J*<sub>PCCC</sub> = 2.7 Hz), 133.0 (d, *J*<sub>PCC</sub> = 11.6 Hz), 129.0, 127.3, 126.2, 126.2 (d, *J*<sub>PCCC</sub> = 3.3 Hz), 126.1 (d, *J*<sub>PC</sub> = 121 Hz), 124.7 (d, *J*<sub>PCC</sub> = 13.8 Hz), 78.0 (d, *J*<sub>POC</sub> = 8.3 Hz), 61.8 (d, *J*<sub>PC</sub> = 111 Hz), 48.7 (d, *J*<sub>POCC</sub> = 5.0 Hz), 43.6, 34.0, 31.7, 25.4, 22.7, 22.1, 20.9, 15.2; HRMS (EI+) *m/z* calcd for C<sub>21</sub>H<sub>29</sub>O<sub>3</sub>P ([M]<sup>+</sup>) 360.1854, found 360.1860; [α]<sub>D</sub><sup>22</sup> = -52.3° (chloroform).

**(*R<sub>p</sub>*)-Menthyl (hydroxymethyl)*p*-anisylphosphinate 6:1**

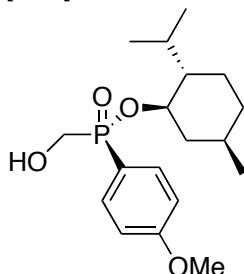

In a round bottom flask was introduced (*R<sub>p</sub>*)-2 (117 mg, 0.5 mmol, 1 equiv), Pd(OAc)<sub>2</sub> (2.3 mg, 0.01 mmol, 2.0 mol %), xantphos (6.4 mg, 0.011 mmol, 2.2 mol %), a mixture of DMF and 1,2-dimethoxyethane (2.25 mL : 0.25 mL), DIPEA (0.11 mL, 0.65 mmol, 1.3 equiv) and 4-bromoanisole (0.06 mL, 0.5 mmol, 1 equiv). The reaction mixture was stirred under a flow of N<sub>2</sub> for 10 minutes and then heated at 115°C for 24 hours before cooling down to rt. The solvent was then removed under vacuum and the resulting residue was dissolved in ethyl acetate and washed with a saturated aqueous solution of NaHCO<sub>3</sub> and brine. The organic layer was dried over MgSO<sub>4</sub>, filtered and

concentrated under vacuum. The crude obtained was purified by column chromatography (hexane/ethyl acetate 5:5 to 0:10) to afford the product as a white solid (90 mg, 53%, 81% de). Mp = 110-112°C;  $^{31}\text{P}$  NMR (162 MHz,  $\text{CDCl}_3$ ):  $\delta$  = 37.8 (s);  $^1\text{H}$  NMR (400 MHz,  $\text{CDCl}_3$ ):  $\delta$  = 7.74-7.84 (m, 2H), 6.96-7.03 (m, 2H), 4.05-4.18 (m, 1H), 3.96-4.05 (m, 2H), 3.87 (s, 3H), 2.60-2.71 (m, 1H), 2.29-2.39 (m, 1H), 2.01 (dq,  $J$  = 2.6 and 7.3 Hz, 1H), 1.58-1.69 (m, 3H), 1.20-1.48 (m, 2H), 0.93 (d,  $J$  = 6.5 Hz, 3H), 0.87 (d,  $J$  = 6.7 Hz, 3H), 0.76-1.02 (m, 2H), 0.51 (d,  $J$  = 6.8 Hz, 3H);  $^{13}\text{C}$  NMR (101 MHz,  $\text{CDCl}_3$ ):  $\delta$  = 162.8 (d,  $J_{\text{PCCC}} = 2.8$  Hz), 133.7 (d,  $J_{\text{PCCC}} = 11.1$  Hz, 2C), 120.5 (d,  $J_{\text{PC}} = 131$  Hz), 114.0 (d,  $J_{\text{PCC}} = 13.2$  Hz, 2C), 77.2 (d,  $J_{\text{POC}} = 7.7$  Hz), 60.5 (d,  $J_{\text{PC}} = 117$  Hz), 55.3, 48.7 (d,  $J_{\text{POCC}} = 6.0$  Hz), 43.6, 34.0, 31.5, 25.4, 22.7, 22.0, 21.0, 15.3; HRMS (EI+)  $m/z$  calcd for  $\text{C}_{18}\text{H}_{29}\text{O}_4\text{P}$  ( $[\text{M}]^+$ ) 340.1803, found 340.1801;  $[\alpha]_{\text{D}}^{24} = -68.3^\circ$  (chloroform).

***(R<sub>p</sub>)-Menthyl cinnamyl(hydroxymethyl)phosphinate 4:1***

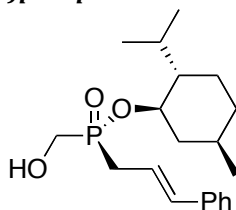

To a solution of *(R<sub>p</sub>)-2* (468 mg, 2 mmol, 1 equiv, > 99% de) in *tert*-amyl alcohol (10 mL) was added  $\text{Pd}_2\text{dba}_3$  (18.3 mg, 0.02 mmol, 1 mol%), xantphos (23.2 mg, 0.04 mmol, 2 mol%) and cinnamyl alcohol (0.26 mL, 2 mmol, 1 equiv). The reaction mixture was stirred at reflux for 20 h under  $\text{N}_2$  in a flask equipped with a Dean-Stark trap. After cooling down the reaction to rt, the solvent was removed under vacuum and the residue obtained was purified by column chromatography (dichloromethane/acetone 100:0 to 90:10) to afford the product as a white solid (681 mg, 97%, > 99% de). Mp = 145-146°C;  $^{31}\text{P}$  NMR (162 MHz,  $\text{CDCl}_3$ ):  $\delta$  = 48.8 (s);  $^1\text{H}$  NMR (400 MHz,  $\text{CDCl}_3$ ):  $\delta$  = 7.19-7.39 (m, 5H), 6.55 (dd,  $J$  = 4.7 and 15.8 Hz, 1H), 6.12-6.27 (m, 1H), 4.20-4.34 (m, 1H), 3.87 (s, 2H), 3.64 (s, 1H), 2.85 (dd,  $J$  = 7.6 and 17.6 Hz, 2H), 2.06-2.22 (m, 2H), 1.60-1.71 (m, 2H), 1.28-1.54 (m, 2H), 1.15 (q,  $J$  = 11.7 Hz, 1H), 0.74-1.07 (m, 2H), 0.91 (d,  $J$  = 6.4 Hz, 3H), 0.86 (d,  $J$  = 6.8 Hz, 3H), 0.77 (d,  $J$  = 7.0 Hz, 3H);  $^{13}\text{C}$  NMR (101 MHz,  $\text{CDCl}_3$ ):  $\delta$  = 136.8 (d,  $J_{\text{PCCC}} = 3.3$  Hz), 135.0 (d,  $J_{\text{PCC}} = 12.2$  Hz), 128.5 (2C), 127.5, 126.2 (d,  $J_{\text{PCCCC}} = 1.7$  Hz, 2C), 118.4 (d,  $J_{\text{PCCC}} = 10.5$  Hz), 76.7 (d,  $J_{\text{POC}} = 8.3$  Hz), 59.5 (d,  $J_{\text{PC}} = 106$  Hz), 48.6 (d,  $J_{\text{POCC}} = 5.6$  Hz, 2C), 43.5, 34.0, 31.6 (d,  $J_{\text{PC}} = 87.3$  Hz), 31.5, 25.5, 22.7, 22.1, 21.0, 15.5; HRMS (EI+)  $m/z$  calcd for  $\text{C}_{20}\text{H}_{31}\text{O}_3\text{P}$  ( $[\text{M}]^+$ ) 350.2011, found 350.2012;  $[\alpha]_{\text{D}}^{24} = -51.6^\circ$  (chloroform).

***(R<sub>p</sub>)-Menthyl (acetoxymethyl)phenylphosphinate 3a:2***

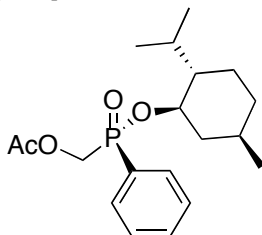

To a solution of *(R<sub>p</sub>)-2* (703 mg, 3 mmol, 1 equiv, >99% de) in dichloromethane (15 mL) at 0°C under  $\text{N}_2$  was added pyridine (0.30 mL, 3.75 mmol, 1.25 equiv) and acetic anhydride (0.34 mL, 3.6 mmol, 1.2 equiv). The ice-bath was removed and the reaction mixture was stirred for 16h at rt. The solvent was removed under vacuum and the residue obtained was solubilized in ethyl acetate. The organic layer was washed with  $\text{NaHCO}_3$  and brine, dried over  $\text{MgSO}_4$ , filtered and concentrated under vacuum to afford the product as a white solid (829 mg, 100%, 94% de).  $^{31}\text{P}$  NMR (162 MHz,  $\text{CDCl}_3$ ):  $\delta$  = 26.8 (dm,  $J$  = 567 Hz);  $^1\text{H}$  NMR (400 MHz,  $\text{CDCl}_3$ ):  $\delta$  = 7.14 (dt,  $J$  = 1.8 and 567 Hz, 1H), 4.09-4.21 (m, 2H), 3.94-4.05 (m, 1H), 2.01-2.08 (m, 1H), 1.95 (s, 3H), 1.83-1.92 (m, 1H), 1.47-1.55 (m, 2H), 1.20-1.36 (m, 2H), 1.10 (q,  $J$  = 11.1 Hz, 1H), 0.79-0.92 (m, 1H), 0.60-0.79 (m, 1H), 0.76 (d,  $J$  = 7.1 Hz, 3H), 0.75 (d,  $J$  = 6.4 Hz, 3H), 0.63 (d,  $J$  = 7.0 Hz, 3H);  $^{13}\text{C}$  NMR (101 MHz,  $\text{CDCl}_3$ ):  $\delta$  = 170.0 (d,  $J_{\text{PCOC}} = 6.5$  Hz),

79.6 (d,  $J_{\text{POC}} = 7.8$  Hz), 60.0 (d,  $J_{\text{PC}} = 113$  Hz), 48.4 (d,  $J_{\text{POCC}} = 6.1$  Hz), 43.2, 33.6, 31.4, 25.5, 22.8, 21.7, 20.7, 20.1, 15.6.

To a suspension of  $\text{Mn}(\text{OAc})_2$  (8.7 mg, 0.05 mmol, 5 mol%),  $\text{MnO}_2$  (261 mg, 3 mmol, 3 equiv.), sodium acetate (246 mg, 3 mmol, 3 equiv.) and benzene (1.8 mL, 20 mmol, 20 equiv.) in acetic acid (2.5 mL) at 70°C under  $\text{N}_2$  was added a solution of (*R<sub>p</sub>*)-7 (276 mg, 1 mmol, 1 equiv, 94% de) in acetic acid (2.5 mL) over 2 hours *via* a syringe pump. The reaction mixture was then stirred for an additional 2h at 70°C under  $\text{N}_2$ . Ethyl acetate (~ 30 mL) and an aqueous solution of  $\text{Na}_2\text{S}_2\text{O}_4$  0.2M saturated with  $\text{NaHCO}_3$  (~40 mL) were added. The biphasic suspension was stirred vigorously for 5 minutes, filtered through celite and the two layers were separated. The organic layer was washed with an aqueous solution of  $\text{Na}_2\text{S}_2\text{O}_4$  0.2M saturated with  $\text{NaHCO}_3$  (~40 mL), a saturated aqueous solution of  $\text{NaHCO}_3$  (~ 40 mL) and brine (~ 40 mL), dried over  $\text{MgSO}_4$ , filtered and concentrated under vacuum. The crude obtained was purified by column chromatography (dichloromethane/acetone 98:2 to 94:6) to afford the product as a yellow oil (183 mg, 52%, de = 94%).  $^{31}\text{P}$  NMR (162 MHz,  $\text{CDCl}_3$ ):  $\delta = 31.8$  (s, 97%);  $^1\text{H}$  NMR (400 MHz,  $\text{CDCl}_3$ ):  $\delta = 7.72$ -7.81 (m, 2H), 7.47-7.54 (m, 1H), 7.37-7.45 (m, 2H), 4.41 (dm,  $J = 43.8$  Hz, 2H), 4.07-4.17 (m, 1H), 2.17-2.26 (m, 1H), 1.95 (s, 3H), 1.87-1.98 (m, 1H), 1.51-1.60 (m, 2H), 1.27-1.41 (m, 2H), 1.21 (q,  $J = 11.4$  Hz, 1H), 0.69-0.92 (m, 2H), 0.84 (d,  $J = 6.4$  Hz, 3H), 0.77 (d,  $J = 7.0$  Hz, 3H), 0.44 (d,  $J = 6.9$  Hz, 3H);  $^{13}\text{C}$  NMR (101 MHz,  $\text{CDCl}_3$ ):  $\delta = 169.8$  (d,  $J_{\text{POCC}} = 8.3$  Hz), 132.7 (d,  $J_{\text{PCCC}} = 2.5$  Hz), 131.7 (d,  $J_{\text{PCCC}} = 9.9$  Hz, 2C), 129.2 (d,  $J_{\text{PC}} = 131$  Hz), 128.4 (d,  $J_{\text{PCC}} = 13.0$  Hz, 2C), 77.8 (d,  $J_{\text{POC}} = 7.5$  Hz), 60.6 (d,  $J_{\text{PC}} = 120$  Hz), 48.6 (d,  $J_{\text{POCC}} = 6.3$  Hz), 43.5, 33.9, 31.5, 25.4, 22.7, 21.9, 21.0, 20.4, 15.3; HRMS ( $\text{Cl}^+$ , methane)  $m/z$  calcd for  $\text{C}_{19}\text{H}_{30}\text{O}_4\text{P}$  ( $[\text{M}+\text{H}]^+$ ) 353.1882, found 353.1873;  $[\alpha]_{\text{D}}^{27} = -78.2^0$  (chloroform).

**(*R<sub>p</sub>*)-Menthyl (hydroxymethyl)phenylphosphinate 3b:<sup>1</sup>**

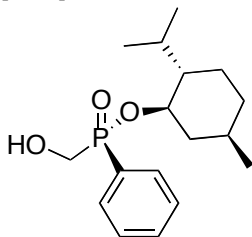

To a solution of (*R<sub>p</sub>*)-3a (150 mg, 0.43 mmol, 1 equiv) in methanol (2 mL) was added potassium carbonate (6 mg, 0.043 mmol, 0.1 equiv.) and the mixture was stirred for 20 h at rt. The solvent was removed under vacuum and then the residue was solubilized in EtOAc (20 mL). Water (20 mL) and  $\text{NaHSO}_4$  were added until the pH was around 1. The aqueous layer was saturated with  $\text{NaCl}$  and the 2 layers were separated. The organic layer was washed with saturated  $\text{NaHCO}_3$  (20 mL) and brine (20 mL), dried over  $\text{MgSO}_4$ , filtered and concentrated under vacuum to afford the product as a white solid (123 mg, 92%, 94% de). Mp = 103-105°C;  $^{31}\text{P}$  NMR (121.47 MHz,  $\text{CDCl}_3$ ):  $\delta = 37.4$  (s);  $^1\text{H}$  NMR (300 MHz,  $\text{CDCl}_3$ ):  $\delta = 7.80$ -7.91 (m, 2H), 7.45-7.62 (m, 3H), 4.09-4.21 (m, 1H), 4.02-4.08 (m, 2H), 2.77-2.87 (m, 1H), 2.29-2.39 (m, 1H), 1.90-2.05 (m, 1H), 1.58-1.69 (m, 3H), 1.22-1.50 (m, 2H), 0.93 (d,  $J = 6.2$  Hz, 3H), 0.85 (d,  $J = 7.0$  Hz, 3H), 0.76-1.02 (m, 2H), 0.47 (d,  $J = 7.0$  Hz, 3H);  $^{13}\text{C}$  NMR (101 MHz,  $\text{CDCl}_3$ ):  $\delta = 132.4$ , 131.8 (d,  $J_{\text{PCCC}} = 9.7$  Hz, 2C), 129.4 (d,  $J_{\text{PC}} = 124$  Hz), 128.4 (d,  $J_{\text{PCC}} = 12.4$  Hz, 2C), 77.5 (d,  $J_{\text{POC}} = 7.3$  Hz), 60.4 (d,  $J_{\text{PC}} = 115$  Hz), 48.7 (d,  $J_{\text{POCC}} = 5.7$  Hz), 43.6, 34.0, 31.6, 25.4, 22.7, 22.0, 21.0, 15.3;  $[\alpha]_{\text{D}}^{27} = -69.0^0$  (chloroform).

**(*R<sub>p</sub>*)-Menthyl (hydroxymethyl)phenylphosphinate 3b:<sup>1</sup>**

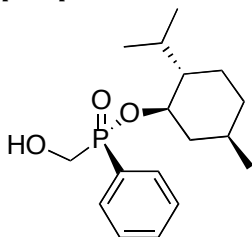

To a suspension of  $\text{Mn}(\text{OAc})_2$  (313 mg, 1.81 mmol, 5 mol%),  $\text{MnO}_2$  (9.45 g, 108.6 mmol, 3 equiv.), sodium acetate (8.91 g, 108.6 mmol, 3 equiv.) and benzene (32.4 mL, 362 mmol, 10 equiv.) in acetic acid (90 mL) at 70°C under  $\text{N}_2$  was added a solution of  $(S_p)/(R_p)$ -7 (10 g, 36.2 mmol, 1 equiv, ratio 54:46) in acetic acid (90 mL) over 2 hours *via* a syringe pump. The reaction mixture was then stirred for an additional 2 hours at 70°C under  $\text{N}_2$ . Ethyl acetate (~ 250 mL) and an aqueous solution of  $\text{Na}_2\text{S}_2\text{O}_4$  0.2M saturated with  $\text{NaHCO}_3$  (~ 250 mL) were added. The suspension was stirred vigorously for 5 minutes, filtered through celite and the two layers were separated. The organic layer was washed with an aqueous solution of  $\text{Na}_2\text{S}_2\text{O}_4$  0.2M saturated with  $\text{NaHCO}_3$  (~ 250 mL), a saturated aqueous solution of  $\text{NaHCO}_3$  (~ 250 mL) and brine (~ 250 mL), dried over  $\text{MgSO}_4$ , filtered and concentrated under vacuum to afford the product as a yellow oil (9.91 g, 78%).  $^{31}\text{P}$  NMR (162 MHz,  $\text{CDCl}_3$ ):  $\delta$  = 32.0 (s, 54%), 31.9 (s, 46%).

To a solution of  $(S_p)/(R_p)$ -3a (8.42 g, 24 mmol, 1 equiv, ratio 54:46) in methanol (50 mL) was added potassium carbonate (330 mg, 2.4 mmol, 0.1 equiv.) and the mixture was stirred for 20 h at rt. The solvent was removed under vacuum and then the residue was solubilized in EtOAc (100 mL). Water (100 mL) and  $\text{NaHSO}_4$  were added until the pH was around 1. The aqueous layer was saturated with  $\text{NaCl}$  and the 2 layers were separated. The organic layer was washed with saturated  $\text{NaHCO}_3$  (100 mL) and brine (100 mL), dried over  $\text{MgSO}_4$ , filtered and concentrated under vacuum. The crude obtained was precipitated in hexane to afford the product as a white solid (1.82 g, 24%, 95% de). Mp = 103-105°C;  $^{31}\text{P}$  NMR (121.47 MHz,  $\text{CDCl}_3$ ):  $\delta$  = 37.4 (s);  $^1\text{H}$  NMR (300 MHz,  $\text{CDCl}_3$ ):  $\delta$  = 7.80-7.91 (m, 2H), 7.45-7.62 (m, 3H), 4.09-4.21 (m, 1H), 4.02-4.08 (m, 2H), 2.77-2.87 (m, 1H), 2.29-2.39 (m, 1H), 1.90-2.05 (m, 1H), 1.58-1.69 (m, 3H), 1.22-1.50 (m, 2H), 0.93 (d,  $J$  = 6.2 Hz, 3H), 0.85 (d,  $J$  = 7.0 Hz, 3H), 0.76-1.02 (m, 2H), 0.47 (d,  $J$  = 7.0 Hz, 3H);  $^{13}\text{C}$  NMR (101 MHz,  $\text{CDCl}_3$ ):  $\delta$  = 132.4, 131.8 (d,  $J_{\text{PCC}} = 9.7$  Hz, 2C), 129.4 (d,  $J_{\text{PC}} = 124$  Hz), 128.4 (d,  $J_{\text{PCC}} = 12.4$  Hz, 2C), 77.5 (d,  $J_{\text{POC}} = 7.3$  Hz), 60.4 (d,  $J_{\text{PC}} = 115$  Hz), 48.7 (d,  $J_{\text{POCC}} = 5.7$  Hz), 43.6, 34.0, 31.6, 25.4, 22.7, 22.0, 21.0, 15.3;  $[\alpha]_{\text{D}}^{27} = -69.0^0$  (chloroform).

***(R\_p)*-menthyl (acetoxymethyl) mesitylphosphinate 8a:<sup>2</sup>**

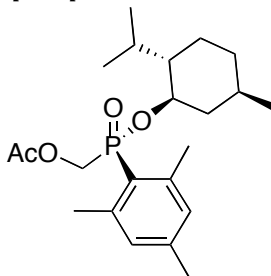

To a solution of  $(R_p)$ -2 (703 mg, 3 mmol, 1 equiv, >99% de) in dichloromethane (15 mL) at 0°C under  $\text{N}_2$  was added pyridine (0.30 mL, 3.75 mmol, 1.25 equiv) and acetic anhydride (0.34 mL, 3.6 mmol, 1.2 equiv). The ice-bath was removed and the reaction mixture was stirred for 16h at rt. The solvent was removed under vacuum and the residue obtained was solubilized in ethyl acetate. The organic layer was washed with  $\text{NaHCO}_3$  and brine, dried over  $\text{MgSO}_4$ , filtered and concentrated under vacuum to afford the product as a white solid (829 mg, 100%, 94% de).  $^{31}\text{P}$  NMR (162 MHz,  $\text{CDCl}_3$ ):  $\delta$  = 26.8 (dm,  $J$  = 567 Hz);  $^1\text{H}$  NMR (400 MHz,  $\text{CDCl}_3$ ):  $\delta$  = 7.14 (dt,  $J$  = 1.8 and 567 Hz, 1H), 4.09-4.21 (m, 2H), 3.94-4.05 (m, 1H), 2.01-2.08 (m, 1H), 1.95 (s, 3H), 1.83-1.92 (m, 1H), 1.47-1.55 (m, 2H), 1.20-1.36 (m, 2H), 1.10 (q,  $J$  = 11.1 Hz, 1H), 0.79-0.92 (m, 1H), 0.60-0.79 (m, 1H), 0.76 (d,  $J$  = 7.1 Hz, 3H), 0.75 (d,  $J$  = 6.4 Hz, 3H), 0.63 (d,  $J$  = 7.0 Hz, 3H);  $^{13}\text{C}$  NMR (101 MHz,  $\text{CDCl}_3$ ):  $\delta$  = 170.0 (d,  $J_{\text{POC}} = 6.5$  Hz), 79.6 (d,  $J_{\text{POC}} = 7.8$  Hz), 60.0 (d,  $J_{\text{PC}} = 113$  Hz), 48.4 (d,  $J_{\text{POCC}} = 6.1$  Hz), 43.2, 33.6, 31.4, 25.5, 22.8, 21.7, 20.7, 20.1, 15.6.

To a suspension of  $\text{Mn}(\text{OAc})_2$  (26 mg, 0.15 mmol, 5 mol%),  $\text{MnO}_2$  (783 mg, 9 mmol, 3 equiv.), sodium acetate (738 mg, 9 mmol, 3 equiv.) and mesitylene (2.1 mL, 15 mmol, 5 equiv.) in acetic acid (7.5 mL) at 70°C under  $\text{N}_2$  was added a solution of  $(R_p)$ -7 (828 mg, 3 mmol, 1 equiv, 94% de) in acetic acid (7.5 mL) over 2 h *via* a syringe pump. The reaction mixture was then stirred for an additional 2h at 70°C under  $\text{N}_2$ . Ethyl acetate (~ 50 mL) and an aqueous solution of  $\text{Na}_2\text{S}_2\text{O}_4$  0.2M saturated with  $\text{NaHCO}_3$  (~ 50 mL) were added. The suspension was stirred vigorously for 10 minutes, filtered through celite and the two layers were separated. The organic layer was washed with an aqueous solution of

Na<sub>2</sub>S<sub>2</sub>O<sub>4</sub> 0.2M saturated with NaHCO<sub>3</sub> (~ 50 mL), a saturated aqueous solution of NaHCO<sub>3</sub> (~ 50 mL) and brine (~ 50 mL), dried over MgSO<sub>4</sub>, filtered and concentrated under vacuum. The crude obtained was purified by column chromatography (dichloromethane/acetone 100:0 to 95:5) to afford the product as a colorless oil (876 mg, 79%, 94% de). <sup>31</sup>P NMR (162 MHz, CDCl<sub>3</sub>): δ = 36.0 (s, 3%), 35.7 (s, 97%); <sup>1</sup>H NMR (400 MHz, CDCl<sub>3</sub>): δ = 6.80 (d, *J* = 4.0 Hz, 2H), 4.31-4.47 (m, 1H), 4.35-4.40 (m, 2H), 2.54 (s, 6H), 2.18 (s, 3H), 2.06-2.13 (m, 1H), 1.91 (s, 3H), 1.82 (dq, *J* = 1.8 and 6.8 Hz, 1H), 1.53-1.64 (m, 2H), 1.36-1.47 (m, 1H), 1.36-1.47 (m, 1H), 1.31 (t, *J* = 11.3 Hz, 1H), 1.20 (q, *J* = 11.6 Hz, 1H), 0.94 (dq, *J* = 2.6 and 12.6 Hz, 1H), 0.74-0.89 (m, 1H), 0.86 (d, *J* = 6.5 Hz, 3H), 0.73 (d, *J* = 7.0 Hz, 3H), 0.59 (d, *J* = 6.8 Hz, 3H); <sup>13</sup>C NMR (101 MHz, CDCl<sub>3</sub>): δ = 169.8 (d, *J*<sub>PCOC</sub> = 7.7 Hz), 143.3 (d, *J*<sub>PCC</sub> = 11.6 Hz, 2C), 141.9 (d, *J*<sub>PCCC</sub> = 2.8 Hz), 130.7 (d, *J*<sub>PCCC</sub> = 13.5 Hz, 2C), 123.3 (d, *J*<sub>PC</sub> = 131 Hz), 76.8 (d, *J*<sub>POC</sub> = 7.6 Hz), 62.4 (d, *J*<sub>PC</sub> = 110 Hz), 48.6 (d, *J*<sub>POCC</sub> = 4.7 Hz), 43.6, 34.0, 31.6, 25.7, 23.3 (d, *J*<sub>PCCC</sub> = 2.3 Hz, 2C), 22.8, 22.0, 20.9 (2C), 20.3, 15.4; HRMS (EI+) *m/z* calcd for C<sub>22</sub>H<sub>35</sub>O<sub>4</sub>P ([M]<sup>+</sup>) 394.2273, found 394.2274.

**(*R<sub>p</sub>*)-Menthyl (hydroxymethyl)mesitylphosphinate 8b:**

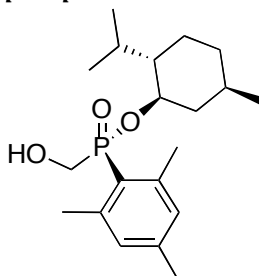

To a solution of (*R<sub>p</sub>*)-8a (876 mg, 2.22 mmol, 1 equiv, 94% de) in methanol (10 mL) was added potassium carbonate (31 mg, 0.22 mmol, 0.1 equiv.) and the mixture was stirred for 20 h at rt. The solvent was removed under vacuum and then the residue was solubilized in ethyl acetate. Water and NaHSO<sub>4</sub> were added until the pH was around 1. The aqueous layer was saturated with NaCl and the 2 layers were separated. The organic layer was washed with saturated NaHCO<sub>3</sub> and brine, dried over MgSO<sub>4</sub>, filtered and concentrated under vacuum. The crude obtained was purified by column chromatography (dichloromethane/acetone 100:0 to 90:10) to afford the product as a colorless oil (741 mg, 95%, 94% de). <sup>31</sup>P NMR (162 MHz, CDCl<sub>3</sub>): δ = 42.3 (s); <sup>1</sup>H NMR (400 MHz, CDCl<sub>3</sub>): δ = 6.82 (s, 1H), 6.82 (s, 1H), 5.87 (s, 1H), 4.34-4.47 (m, 1H), 3.90-4.07 (m, 2H), 2.57 (s, 6H), 2.25-2.33 (m, 1H), 2.21 (s, 3H), 1.82-1.94 (m, 1H), 1.57-1.68 (m, 2H), 1.39-1.53 (m, 1H), 1.19-1.37 (m, 2H), 0.71-1.04 (m, 2H), 0.92 (d, *J* = 6.2 Hz, 3H), 0.77 (d, *J* = 6.9 Hz, 3H), 0.62 (d, *J* = 6.7 Hz, 3H); <sup>13</sup>C NMR (101 MHz, CDCl<sub>3</sub>): δ = 143.3 (d, *J*<sub>PCC</sub> = 11.2 Hz, 2C), 141.6 (d, *J*<sub>PCCC</sub> = 2.5 Hz), 130.6 (d, *J*<sub>PCCC</sub> = 12.7 Hz, 2C), 123.5 (d, *J*<sub>PC</sub> = 122 Hz), 76.7 (d, *J*<sub>POC</sub> = 7.8 Hz), 62.4 (d, *J*<sub>PC</sub> = 107 Hz), 48.8 (d, *J*<sub>POCC</sub> = 4.4 Hz), 43.6, 34.2, 31.7, 25.7, 23.4 (d, *J*<sub>PCCC</sub> = 1.8 Hz, 2C), 22.9, 22.2, 21.0, 21.0, 15.4; HRMS (EI+) *m/z* calcd for C<sub>20</sub>H<sub>33</sub>O<sub>3</sub>P ([M]<sup>+</sup>) 352.2167, found 352.2164; [α]<sub>D</sub><sup>25</sup> = -21.1° (chloroform).

**(*R<sub>p</sub>*)/(*S<sub>p</sub>*) Menthyl (hydroxymethyl)mesitylphosphinate 8b:**

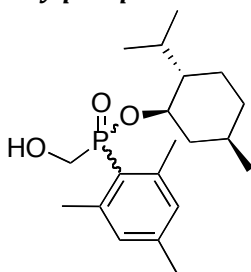

To a suspension of Mn(OAc)<sub>2</sub> (467 mg, 2.7 mmol, 5 mol%), MnO<sub>2</sub> (13.92 g, 160 mmol, 3 equiv.), sodium acetate (13.12 g, 160 mmol, 3 equiv.) and mesitylene (37 mL, 266 mmol, 5 equiv.) in acetic acid (90 mL) at 70°C under N<sub>2</sub> was added a solution of (*S<sub>p</sub>*)/(*R<sub>p</sub>*)-7 (14.7 g, 53.2 mmol, 1 equiv, ratio



54:46) in acetic acid (90 mL) over 2 hours *via* a syringe pump. The reaction mixture was then stirred for an additional 2h at 70°C under N<sub>2</sub>. Ethyl acetate (~ 250 mL) and an aqueous solution of Na<sub>2</sub>S<sub>2</sub>O<sub>4</sub> 0.2M saturated with NaHCO<sub>3</sub> (~ 250 mL) were added. The suspension was stirred vigorously for 5 minutes, filtered through celite and the two layers were separated. The organic layer was washed with an aqueous solution of Na<sub>2</sub>S<sub>2</sub>O<sub>4</sub> 0.2M saturated with NaHCO<sub>3</sub> (~ 250 mL), a saturated aqueous solution of NaHCO<sub>3</sub> (~ 250 mL) and brine (~ 250 mL), dried over MgSO<sub>4</sub>, filtered and concentrated under vacuum.

The crude obtained was solubilized in methanol (100 mL) and potassium carbonate (733 mg, 5.3 mmol, 0.1 equiv.) was added and the mixture was stirred for 20 h at rt. The solvent was removed under vacuum and then the residue was solubilized in EtOAc (150 mL). Water (150 mL) and NaHSO<sub>4</sub> were added until the pH was around 1. The aqueous layer was saturated with NaCl and the 2 layers were separated. The organic layer was washed with saturated NaHCO<sub>3</sub> (150 mL) and brine (150 mL), dried over MgSO<sub>4</sub>, filtered and concentrated under vacuum. The crude obtained was precipitated in hexane to afford the product as a white solid (11.3 g, 60% on 3 steps). <sup>31</sup>P NMR (121.5 MHz, CDCl<sub>3</sub>): δ = 41.5 (50%, s), 41.0 (50%, s); <sup>1</sup>H NMR (300 MHz, CDCl<sub>3</sub>): δ = 6.92 (s, 2H), 4.32-4.49 (m, 1H), 3.77-4.12 (m, 3H), 2.64 (s, 3H), 2.61 (s, 3H), 2.21-2.34 (m, 4H), 1.84-1.95 (m, 1H), 1.61-1.73 (m, 2H), 1.22-1.54 (m, 3H), 0.76-1.13 (m, 9.5H), 0.64 (d, *J* = 6.7 Hz, 1.5H).

***(R<sub>p</sub>)/(S<sub>p</sub>) Menthyl-[4-(acetamido)phenyl](hydroxymethyl)phosphinate 9b:***

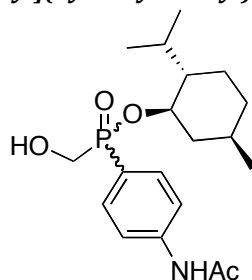

To a suspension of Mn(OAc)<sub>2</sub> (385 mg, 2.23 mmol, 5 mol%), MnO<sub>2</sub> (11.62 g, 133.5 mmol, 3 equiv.), sodium acetate (10.95 g, 133.5 mmol, 3 equiv.) and acetanilide (30.1 g, 222.6 mmol, 5 equiv.) in acetic acid (90 mL) at 70°C under N<sub>2</sub> was added a solution of (*S<sub>p</sub>)/(R<sub>p</sub>)-7* (12.3 g, 44.5 mmol, 1 equiv) in acetic acid (90 mL) over 2 hours *via* a syringe pump. The reaction mixture was then stirred for an additional 2h at 70°C under N<sub>2</sub>. Ethyl acetate (~ 200 mL) and an aqueous solution of Na<sub>2</sub>S<sub>2</sub>O<sub>4</sub> 0.2M saturated with NaHCO<sub>3</sub> (~ 200 mL) were added. The suspension was stirred vigorously for 5 minutes, filtered through celite and the two layers were separated. The organic layer was washed with an aqueous solution of Na<sub>2</sub>S<sub>2</sub>O<sub>4</sub> 0.2M saturated with NaHCO<sub>3</sub> (~ 200 mL), a saturated aqueous solution of NaHCO<sub>3</sub> (~ 200 mL) and brine (~ 200 mL), dried over MgSO<sub>4</sub>, filtered and concentrated under vacuum.

The crude obtained was solubilized in methanol (100 mL) and potassium carbonate (622 mg, 4.5 mmol, 0.1 equiv.) was added and the mixture was stirred for 20 h at rt. The solvent was removed under vacuum and then the residue was solubilized in EtOAc (150 mL). Water (150 mL) and NaHSO<sub>4</sub> were added until the pH was around 1. The aqueous layer was saturated with NaCl and the 2 layers were separated. The organic layer was washed with saturated NaHCO<sub>3</sub> (150 mL) and brine (150 mL), dried over MgSO<sub>4</sub>, filtered and concentrated under vacuum. The crude obtained was precipitated in hexane to afford the product as a white solid (6.0 g, 37% on 3 steps). <sup>31</sup>P NMR (121.5 MHz, CDCl<sub>3</sub>): δ = 37.8 (48%, s), 37.2 (52%, s); <sup>1</sup>H NMR (300 MHz, CDCl<sub>3</sub>): δ = 9.44 (s, 1H), 7.31-7.48 (m, 2H), 7.13-7.26 (m, 2H), 4.16-4.33 (m, 1.5H), 3.95-4.12 (m, 1.5H), 2.11-2.24 (m, 1H), 2.15 (s, 3H), 1.93-2.05 (m, 1H), 1.75-1.83 (m, 1H), 1.58-1.72 (m, 2H), 1.22-1.44 (m, 2H), 0.95-1.08 (m, 1H), 0.98 (d, *J* = 7.0 Hz, 1.5H), 0.93 (d, *J* = 6.4 Hz, 1.5H), 0.86 (d, *J* = 6.8 Hz, 1.5H), 0.85 (d, *J* = 6.9 Hz, 1.5H), 0.80 (d, *J* = 6.5 Hz, 1.5H), 0.55 (d, *J* = 6.9 Hz, 1.5H).

***(R<sub>p</sub>)-Menthyl (hydroxymethyl)methylphosphinate 10:<sup>1</sup>***

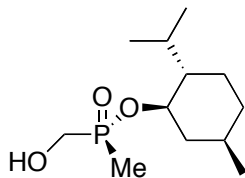

To a solution of (*R<sub>p</sub>*)-2 (234 mg, 1 mmol, 1 equiv, 98% de) in dichloromethane (10 mL) at 0°C and under N<sub>2</sub> was added bis(trimethylsilyl)acetamide (0.49 mL, 2 mmol, 2 equiv) followed by iodomethane (0.062 mL, 1 mmol, 1 equiv). The ice-bath was removed and the reaction mixture was then stirred for 20 h at rt. Methanol was added (0.08 mL, 2 mmol, 2 equiv) and the reaction mixture was concentrated under vacuum. The residue obtained was dissolved in ethyl acetate and the organic layer was washed with a saturated aqueous solution of NaHCO<sub>3</sub> and brine, dried over MgSO<sub>4</sub>, filtered and concentrated under vacuum. The crude obtained was purified by column chromatography (dichloromethane/acetone 10:0 to 7:3) to afford the product as a white solid (188 mg, 76%, > 99% de). Mp = 82-83°C; <sup>31</sup>P NMR (162 MHz, CDCl<sub>3</sub>): δ = 51.9 (s); <sup>1</sup>H NMR (400 MHz, CDCl<sub>3</sub>): δ = 4.15-4.28 (m, 1H), 3.73-3.90 (m, 2H), 3.07-3.16 (m, 1H), 2.08-2.18 (m, 1H), 2.06 (dq, *J* = 2.3 and 7.0 Hz, 1H), 1.62-1.73 (m, 2H), 1.52 (d, *J* = 13.7 Hz, 3H), 1.40-1.58 (m, 1H), 1.24-1.38 (m, 1H), 1.15 (q, *J* = 11.1 Hz, 1H), 0.93 (d, *J* = 6.7 Hz, 3H), 0.91 (d, *J* = 6.7 Hz, 3H), 0.78-1.08 (m, 2H), 0.82 (d, *J* = 6.7 Hz, 3H); <sup>13</sup>C NMR (101 MHz, CDCl<sub>3</sub>): δ = 76.2 (d, *J*<sub>POC</sub> = 7.8 Hz), 60.6 (d, *J*<sub>PC</sub> = 111 Hz), 48.4 (d, *J*<sub>POCC</sub> = 5.5 Hz), 43.4, 33.9, 31.4, 25.6, 22.7, 21.9, 20.9, 15.6, 11.8 (d, *J*<sub>PC</sub> = 91.2 Hz); HRMS (EI+) *m/z* calcd for C<sub>12</sub>H<sub>26</sub>O<sub>3</sub>P ([M+H]<sup>+</sup>) 249.1620, found 249.1621; [α]<sub>D</sub><sup>22</sup> = -60.6° (chloroform).

**(*R<sub>p</sub>*)-Menthyl allyl(hydroxymethyl)phosphinate 11:<sup>1</sup>**

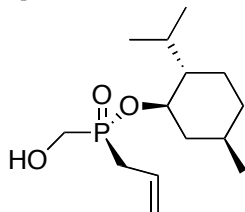

To a solution of (*R<sub>p</sub>*)-2 (117 mg, 0.5 mmol, 1 equiv, 98% de) in dichloromethane (5 mL) at 0°C and under N<sub>2</sub> was added bis(trimethylsilyl)acetamide (0.25 mL, 1 mmol, 2 equiv) followed by allyl bromide (0.09 mL, 1 mmol, 2 equiv). The ice-bath was removed and the reaction mixture was stirred for 36 h at rt. Methanol was added (0.04 mL, 1 mmol, 2 equiv) and the reaction mixture was then concentrated under vacuum. The residue obtained was dissolved in ethyl acetate and the organic layer was washed with a saturated aqueous solution of NaHCO<sub>3</sub> and brine, dried over MgSO<sub>4</sub>, filtered and concentrated under vacuum. The crude obtained was purified by column chromatography (dichloromethane/acetone 100:0 to 96:4) to afford the product as white solid (88 mg, 64%, 95% de). Mp = 69-71°C; <sup>31</sup>P NMR (162 MHz, CDCl<sub>3</sub>): δ = 48.4 (s); <sup>1</sup>H NMR (400 MHz, CDCl<sub>3</sub>): δ = 5.74-5.93 (m, 1H), 5.19-5.32 (m, 2H), 4.18-4.32 (m, 1H), 3.81-3.89 (m, 2H), 3.53-3.64 (m, 1H), 2.64-2.77 (m, 2H), 2.06-2.18 (m, 2H), 1.61-1.72 (m, 2H), 1.40-1.54 (m, 1H), 1.24-1.39 (m, 1H), 1.15 (q, *J* = 11.5 Hz, 1H), 0.92 (d, *J* = 7.0 Hz, 6H), 0.78-1.08 (m, 2H), 0.81 (d, *J* = 7.0 Hz, 3H); <sup>13</sup>C NMR (101 MHz, CDCl<sub>3</sub>): δ = 127.2 (d, *J*<sub>PCCC</sub> = 9.4 Hz), 120.3 (d, *J*<sub>PCC</sub> = 12.7 Hz), 76.7 (d, *J*<sub>POC</sub> = 8.3 Hz), 59.1 (d, *J*<sub>PC</sub> = 107 Hz), 48.5 (d, *J*<sub>POCC</sub> = 5.5 Hz), 43.4, 34.0, 32.4 (d, *J*<sub>PC</sub> = 86.8 Hz), 31.5, 25.5, 22.7, 22.0, 21.0, 15.6; HRMS (EI+) *m/z* calcd for C<sub>14</sub>H<sub>27</sub>O<sub>3</sub>P ([M]<sup>+</sup>) 274.1698, found 274.1694; [α]<sub>D</sub><sup>24</sup> = -71.3° (chloroform).

**(*R<sub>p</sub>*)-Menthyl benzyl(hydroxymethyl)phosphinate 12:**

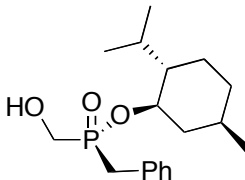

To a solution of (*R<sub>p</sub>*)-2 (1.17 g, 5 mmol, 1 equiv, 98% de) in dichloromethane (50 mL) was added at 0°C and under N<sub>2</sub> bis(trimethylsilyl)acetamide (2.45 mL, 10 mmol, 2 equiv) followed by benzylbromide (1.2 mL, 10 mmol, 2 equiv). The ice bath was removed and the reaction mixture was stirred for 12 h at rt. Methanol was then added (0.40 mL, 10 mmol, 2 equiv) and the mixture was concentrated under vacuum. The residue obtained was dissolved in ethyl acetate and the organic layer was washed with a saturated aqueous solution of NaHCO<sub>3</sub> and brine, dried over MgSO<sub>4</sub>, filtered and concentrated under vacuum. The crude obtained was purified by column chromatography (dichloromethane/acetone 98:2 to 90:10) to afford the product as a white solid (1.353 g, 84%, > 99% de). Mp = 133-134°C; <sup>31</sup>P NMR (162 MHz, CDCl<sub>3</sub>): δ = 47.1 (s); <sup>1</sup>H NMR (400 MHz, CDCl<sub>3</sub>): δ = 7.22-7.36 (m, 5H), 4.35 (dt, *J* = 6.0 Hz, 1H), 4.16-4.26 (m, 1H), 3.71-3.86 (m, 2H), 3.17-3.32 (m, 2H), 2.02-2.09 (m, 1H), 1.85 (dq, *J* = 2.5 and 7.0 Hz, 1H), 1.59-1.68 (m, 2H), 1.36-1.50 (m, 1H), 1.23-1.33 (m, 1H), 1.12 (q, *J* = 11.2 Hz, 1H), 0.97 (dq, *J* = 3.0 and 12.7 Hz, 1H), 0.76-0.93 (m, 1H), 0.90 (d, *J* = 6.6 Hz, 3H), 0.83 (d, *J* = 7.0 Hz, 3H), 0.67 (d, *J* = 6.9 Hz, 3H); <sup>13</sup>C NMR (101 MHz, CDCl<sub>3</sub>): δ = 131.3 (d, *J*<sub>PCC</sub> = 7.9 Hz), 130.0 (d, *J*<sub>PCCC</sub> = 5.6 Hz, 2C), 128.5 (d, *J*<sub>PCCCC</sub> = 2.6 Hz, 2C), 126.7 (d, *J*<sub>PCCCCC</sub> = 3.1 Hz), 76.6 (d, *J*<sub>POC</sub> = 7.9 Hz), 59.2 (d, *J*<sub>PC</sub> = 106 Hz), 48.6 (d, *J*<sub>POCC</sub> = 5.3 Hz), 43.4, 34.1 (d, *J*<sub>PC</sub> = 86.2 Hz), 34.0, 31.5, 25.3, 22.7, 22.1, 21.1, 15.4; HRMS (EI+) *m/z* calcd for C<sub>18</sub>H<sub>29</sub>O<sub>3</sub>P ([M]<sup>+</sup>) 324.1854, found 324.1852; [α]<sub>D</sub><sup>24</sup> = -27.9° (chloroform).

**(*R<sub>p</sub>*)-Menthyl (hydroxymethyl)triphenylmethylphosphinate 13:**

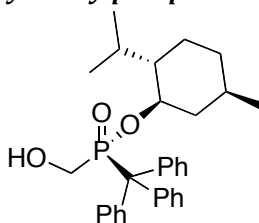

To a solution of (*R<sub>p</sub>*)-2 (468 mg, 2 mmol, 1 equiv, 96% de) in dichloromethane (10 mL) was added at 0°C under N<sub>2</sub> bis(trimethylsilyl)acetamide (1.0 mL, 4 mmol, 2 equiv) followed by bromotriphenylmethane (1.29 g, 4 mmol, 2 equiv). The ice bath was removed and the reaction mixture was stirred for 12 h at rt. Methanol was then added (0.16 mL, 4 mmol, 2 equiv) and the mixture was concentrated under vacuum. The residue obtained was dissolved in ethyl acetate and the organic layer was washed with a saturated aqueous solution of NaHCO<sub>3</sub> and brine, dried over MgSO<sub>4</sub>, filtered and concentrated under vacuum. The crude obtained was purified by column chromatography (dichloromethane/acetone 100:0 to 95:5) to afford the product as a white solid (465 mg, 49%, 95% de). Mp = 157-158°C; <sup>31</sup>P NMR (162 MHz, CDCl<sub>3</sub>): δ = 47.7 (s); <sup>1</sup>H NMR (400 MHz, CDCl<sub>3</sub>): δ = 7.43-7.55 (m, 6H), 7.22-7.35 (m, 9H), 4.27-4.47 (m, 2H), 3.75-3.88 (m, 1H), 3.44-3.55 (m, 1H), 2.18-2.27 (m, 1H), 1.48-1.67 (m, 3H), 1.34-1.45 (m, 1H), 1.03-1.19 (m, 2H), 0.76-1.01 (m, 2H), 0.90 (d, *J* = 6.3 Hz, 3H), 0.68 (d, *J* = 6.9 Hz, 3H), 0.64 (d, *J* = 6.7 Hz, 3H); <sup>13</sup>C NMR (101 MHz, CDCl<sub>3</sub>): δ = 141.3 (s, 3C), 130.9 (d, *J*<sub>PCCC</sub> = 4.5 Hz, 6C), 128.0 (s, 6C), 127.0 (s, 3C), 78.4 (d, *J*<sub>POC</sub> = 9.1 Hz), 63.3 (d, *J*<sub>PC</sub> = 83.5 Hz), 60.6 (d, *J*<sub>PC</sub> = 92.9 Hz), 49.1 (d, *J*<sub>POCC</sub> = 5.3 Hz), 42.5, 34.0, 31.6, 24.5, 22.7, 22.2, 21.3, 15.8; HRMS (EI+) *m/z* calcd for C<sub>30</sub>H<sub>37</sub>O<sub>3</sub>P ([M]<sup>+</sup>) 476.2480, found 476.2470; [α]<sub>D</sub><sup>25</sup> = -9.9° (chloroform).

**(*R<sub>p</sub>*)-Menthyl (hydroxymethyl)methylphosphinate 10:<sup>1</sup>**

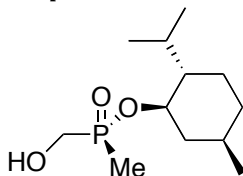

To a solution of (*R<sub>p</sub>*)-2 (234 mg, 1 mmol, 1 equiv, 98% de) in tetrahydrofuran (5 mL) at -78°C and under N<sub>2</sub> was added a solution of LiHMDS 1.0M in tetrahydrofuran (2.0 mL, 2 mmol, 2 equiv). After 15 minutes of stirring, iodomethane (0.062 mL, 1 mmol, 1 equiv) was added at -78°C and then the reaction mixture was allowed to warm-up to room temperature over 1 hour. The mixture was then stirred for an additional 1 hour at rt. A saturated aqueous solution of NH<sub>4</sub>Cl was added and the two

layers were separated. The aqueous layer was extracted twice with dichloromethane. The combined organic layer was washed with brine, dried over  $\text{MgSO}_4$ , filtered and concentrated under vacuum. The crude obtained was purified by column chromatography (dichloromethane/acetone 10:0 to 7:3) to afford the product as a white solid (202 mg, 81%, > 99% de). Mp = 82-83°C;  $^{31}\text{P}$  NMR (162 MHz,  $\text{CDCl}_3$ ):  $\delta$  = 51.9 (s);  $^1\text{H}$  NMR (400 MHz,  $\text{CDCl}_3$ ):  $\delta$  = 4.15-4.28 (m, 1H), 3.73-3.90 (m, 2H), 3.07-3.16 (m, 1H), 2.08-2.18 (m, 1H), 2.06 (dq,  $J$  = 2.3 and 7.0 Hz, 1H), 1.62-1.73 (m, 2H), 1.52 (d,  $J$  = 13.7 Hz, 3H), 1.40-1.58 (m, 1H), 1.24-1.38 (m, 1H), 1.15 (q,  $J$  = 11.1 Hz, 1H), 0.93 (d,  $J$  = 6.7 Hz, 3H), 0.91 (d,  $J$  = 6.7 Hz, 3H), 0.78-1.08 (m, 2H), 0.82 (d,  $J$  = 6.7 Hz, 3H);  $^{13}\text{C}$  NMR (101 MHz,  $\text{CDCl}_3$ ):  $\delta$  = 76.2 (d,  $J_{\text{POC}}$  = 7.8 Hz), 60.6 (d,  $J_{\text{PC}}$  = 111 Hz), 48.4 (d,  $J_{\text{POCC}}$  = 5.5 Hz), 43.4, 33.9, 31.4, 25.6, 22.7, 21.9, 20.9, 15.6, 11.8 (d,  $J_{\text{PC}}$  = 91.2 Hz); HRMS (EI+)  $m/z$  calcd for  $\text{C}_{12}\text{H}_{26}\text{O}_3\text{P}$  ( $[\text{M}+\text{H}]^+$ ) 249.1620, found 249.1621;  $[\alpha]_{\text{D}}^{22}$  = -60.6° (chloroform).

***(R\_p)*-Menthyl hydroxymethyl(*N*-methylphthalimide)phenylphosphinate 14:**

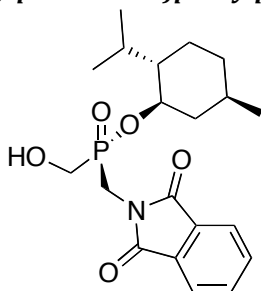

To a solution of (*S\_p*)/(*R\_p*)-2 (4.69 g, 20 mmol, 1.0 equiv, ratio 55:45) and *N*-(bromomethyl)phthalimide (4.8 g, 20 mmol, 1.0 equiv) in toluene was added at rt under  $\text{N}_2$  hexamethyldisilazane (10.4 mL, 50 mmol, 2.5 equiv) and trimethylsilyl chloride (6.35 mL, 50 mmol, 2.5 equiv). The reaction mixture was stirred for 16 hours at reflux under  $\text{N}_2$ . Methanol (2.02 mL, 50 mmol, 2.5 equiv) was added and the mixture was concentrated under vacuum. The residue was dissolved in ethyl acetate and the organic layer was washed with  $\text{NaHCO}_3$  and brine, dried over  $\text{MgSO}_4$ , filtered and concentrated under vacuum. The residue obtained was purified by crystallization in a mixture of dichloromethane/diethyl ether (20 mL:200 mL) to afford the product as a white solid (2.06 g, 26%, >99% de). Mp = 161-162°C;  $^{31}\text{P}$  NMR (162 MHz,  $\text{CDCl}_3$ ):  $\delta$  = 41.1 (s);  $^1\text{H}$  NMR (400 MHz,  $\text{CDCl}_3$ ):  $\delta$  = 7.88-7.93 (m, 2H), 7.75-7.81 (m, 2H), 4.30-4.40 (m, 1H), 4.11-4.25 (m, 2H), 3.96 (d,  $J$  = 3.5 Hz, 2H), 3.43 (1H), 2.25-2.33 (m, 1H), 2.00 (dq,  $J$  = 2.6 and 7.0 Hz, 1H), 1.62-1.71 (m, 2H), 1.42-1.56 (m, 1H), 1.31-1.39 (m, 1H), 1.28 (q,  $J$  = 11.1 Hz, 1H), 0.81-1.07 (m, 2H), 0.94 (d,  $J$  = 6.5 Hz, 3H), 0.85 (d,  $J$  = 7.0 Hz, 3H), 0.78 (d,  $J$  = 6.9 Hz, 3H);  $^{13}\text{C}$  NMR (101 MHz,  $\text{CDCl}_3$ ):  $\delta$  = 167.8 (2C), 134.5 (2C), 131.8 (2C), 123.8 (2C), 78.5 (d,  $J_{\text{POC}}$  = 8.1 Hz), 59.2 (d,  $J_{\text{PC}}$  = 105 Hz), 48.5 (d,  $J_{\text{POCC}}$  = 6.0 Hz), 43.6, 34.8 (d,  $J_{\text{PC}}$  = 98.0 Hz), 33.9, 31.6, 25.6, 22.8, 21.9, 20.9, 15.5; HRMS (EI+)  $m/z$  calcd for  $\text{C}_{21}\text{H}_{30}\text{O}_5\text{P}$  ( $[\text{M}+\text{H}]^+$ ) 394.1783, found 394.1777;  $[\alpha]_{\text{D}}^{25}$  = -24.5° (chloroform).

***(R\_p)*-Menthyl (acetoxymethyl)octylphosphinate 15:<sup>3</sup>**

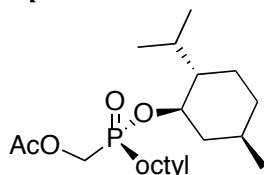

To a solution of (*R\_p*)-2 (703 mg, 3 mmol, 1 equiv, >99% de) in dichloromethane (15 mL) at 0°C under  $\text{N}_2$  was added pyridine (0.30 mL, 3.75 mmol, 1.25 equiv) and acetic anhydride (0.34 mL, 3.6 mmol, 1.2 equiv). The ice-bath was removed and the reaction mixture was stirred for 16h at rt. The solvent was removed under vacuum and the residue obtained was solubilized in ethyl acetate. The organic layer was washed with  $\text{NaHCO}_3$  and brine, dried over  $\text{MgSO}_4$ , filtered and concentrated under vacuum to afford the product as a white solid (829 mg, 100%, 95% de).<sup>7</sup>  $^{31}\text{P}$  NMR (162 MHz,  $\text{CDCl}_3$ ):  $\delta$  = 26.8 (dm,  $J$  = 567 Hz);  $^1\text{H}$  NMR (400 MHz,  $\text{CDCl}_3$ ):  $\delta$  = 7.14 (dt,  $J$  = 1.8 and 567 Hz, 1H), 4.09-4.21 (m, 2H), 3.94-4.05 (m, 1H), 2.01-2.08 (m, 1H), 1.95 (s, 3H), 1.83-1.92 (m, 1H), 1.47-1.55 (m, 2H), 1.20-

1.36 (m, 2H), 1.10 (q,  $J = 11.1$  Hz, 1H), 0.79-0.92 (m, 1H), 0.60-0.79 (m, 1H), 0.76 (d,  $J = 7.1$  Hz, 3H), 0.75 (d,  $J = 6.4$  Hz, 3H), 0.63 (d,  $J = 7.0$  Hz, 3H);  $^{13}\text{C}$  NMR (101 MHz,  $\text{CDCl}_3$ ):  $\delta = 170.0$  (d,  $J_{\text{PCOC}} = 6.5$  Hz), 79.6 (d,  $J_{\text{POC}} = 7.8$  Hz), 60.0 (d,  $J_{\text{PC}} = 113$  Hz), 48.4 (d,  $J_{\text{POCC}} = 6.1$  Hz), 43.2, 33.6, 31.4, 25.5, 22.8, 21.7, 20.7, 20.1, 15.6.

To a solution of (*R<sub>p</sub>*)-7 (553 mg, 2 mmol, 1 equiv) in DMSO (5 mL) was added 1-octene (0.31 mL, 2 mmol, 1 equiv) and  $\text{Mn}(\text{OAc})_2$  (17 mg, 0.1 mmol, 5 mol%). The reaction mixture was stirred for 16 h at 100°C under air. Ethyl acetate and an aqueous solution of  $\text{Na}_2\text{S}_2\text{O}_4$  at 0.5M were added and the two layers were stirred for 10 minutes and then separated. The organic layer was washed with brine, dried over  $\text{MgSO}_4$ , filtered and concentrated under vacuum. The crude obtained was purified by column chromatography (hexane/ethyl acetate 8:2 to 7:3) to afford the product as a white solid (424 mg, 55%, 94% de). Mp = 57-59°C;  $^{31}\text{P}$  NMR (162 MHz,  $\text{CDCl}_3$ ):  $\delta = 46.3$  (s);  $^1\text{H}$  NMR (400 MHz,  $\text{CDCl}_3$ ):  $\delta = 3.97$ -4.12 (m, 2H), 1.88 (s, 3H), 1.49-1.59 (1H), 1.32-1.47 (m, 3H), 0.98-1.28 (m, 9H), 0.91 (q,  $J = 11.5$  Hz, 1H), 0.71-0.84 (m, 1H), 0.54-0.72 (m, 1H), 0.68 (d,  $J = 7.0$  Hz, 3H), 0.68 (d,  $J = 6.4$  Hz, 3H), 0.64 (t,  $J = 6.8$  Hz, 3H), 0.59 (d,  $J = 7.0$  Hz, 3H);  $^{13}\text{C}$  NMR (75.46 MHz,  $\text{CDCl}_3$ ):  $\delta = 169.5$  (d,  $J_{\text{PCOC}} = 7.9$  Hz), 76.2 (d,  $J_{\text{POC}} = 7.7$  Hz), 59.6 (d,  $J_{\text{PC}} = 106$  Hz), 48.4 (d,  $J_{\text{POCC}} = 6.0$  Hz), 43.1, 33.8, 31.6, 31.3, 30.5 (d,  $J_{\text{PCC}} = 15.5$  Hz), 28.8, 28.7, 27.2 (d,  $J_{\text{PC}} = 95.9$  Hz), 25.4, 22.6, 22.4, 21.8, 20.9 (d,  $J_{\text{PCC}} = 4.2$  Hz), 20.8, 20.3, 15.4, 13.8; HRMS (EI+)  $m/z$  calcd for  $\text{C}_{21}\text{H}_{41}\text{O}_4\text{P}$  ( $[\text{M}+\text{H}]^+$ ) 389.2821, found 389.2812;  $[\alpha]_{\text{D}} = -34.6^\circ$ .

**(*R<sub>p</sub>*)-Menthyl phenyl-H-phosphinate 1:1**

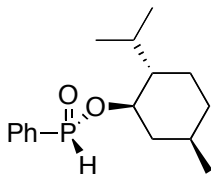

To a solution of *N*-chlorosuccinimide (4.0 g, 30 mmol, 3 equiv) in dichloromethane (150 mL) at -78°C and under  $\text{N}_2$  was added dropwise a solution of dimethyl sulfide (2.2 mL, 30 mmol, 3 equiv) in dichloromethane (10 mL). After 30 minutes at -78°C, a solution of (*S<sub>p</sub>*)-3 (3.1 g, 10 mmol, 1 equiv, >99% de) in dichloromethane (30 mL) was added over 20 minutes. After 1h at -78°C, triethylamine (7 mL, 50 mmol, 5 equiv) was added over 15 minutes and the reaction was stirred for 30 minutes at -78°C. After warming up the reaction to rt, water was added and the two layers were separated. The aqueous layer was extracted with dichloromethane (X2). The combined organic layer was dried over  $\text{MgSO}_4$ , filtered and concentrated under vacuum. The crude obtained was purified by column chromatography (hexane/ethyl acetate 9:1 to 8:2) to afford the product as a colorless oil (2.58 g, 92%, >99% de).  $^{31}\text{P}$  NMR (162 MHz,  $\text{CDCl}_3$ ):  $\delta = 24.7$  (dm,  $J = 553$  Hz);  $^1\text{H}$  NMR (400 MHz,  $\text{CDCl}_3$ ):  $\delta = 7.73$ -7.84 (m, 2H), 7.66 (d,  $J = 553$  Hz, 1H), 7.46-7.64 (m, 3H), 4.22-4.36 (m, 1H), 2.14-2.27 (m, 2H), 1.62-1.75 (m, 2H), 1.38-1.54 (m, 2H), 1.24 (q,  $J = 11.2$  Hz, 1H), 0.78-1.13 (m, 2H), 0.96 (d,  $J = 7.0$  Hz, 3H), 0.90 (d,  $J = 6.4$  Hz, 3H), 0.86 (d,  $J = 7.0$  Hz, 3H);  $[\alpha]_{\text{D}}^{23} = -35.5^\circ$  (chloroform, literature with 90% de: -21.0° in benzene).

**(*R<sub>p</sub>*)-Menthyl phenyl-H-phosphinate 1:1**

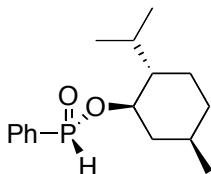

To a solution of *N*-chlorosuccinimide (12.95 g, 97 mmol, 3 equiv) in dichloromethane (400 mL) at -78°C and under  $\text{N}_2$  was added dropwise a solution of 1-(methylthio)dodecane (21 g, 97 mmol, 3 equiv) in dichloromethane (30 mL). After 30 minutes at -78°C, a solution of (*S<sub>p</sub>*)-3 (10 g, 32 mmol, 1 equiv, >99% de) in dichloromethane (70 mL) was added over 20 minutes. After 1h at -78°C, triethylamine (22.5 mL, 161 mmol, 5 equiv) was added over 15 minutes and the reaction was stirred for 30 minutes at -78°C. After warming up the reaction to rt, water was added and the two layers were separated. The aqueous layer was extracted with dichloromethane (X2). The combined organic

layer was dried over  $\text{MgSO}_4$ , filtered and concentrated under vacuum. The crude obtained was purified by column chromatography (hexane/ethyl acetate 9:1 to 7:3) to afford the product as a colorless oil (5.8 g, 65%, >99% de).  $^{31}\text{P}$  NMR (162 MHz,  $\text{CDCl}_3$ ):  $\delta$  = 24.7 (dm,  $J$  = 553 Hz);  $^1\text{H}$  NMR (400 MHz,  $\text{CDCl}_3$ ):  $\delta$  = 7.73-7.84 (m, 2H), 7.66 (d,  $J$  = 553 Hz, 1H), 7.46-7.64 (m, 3H), 4.22-4.36 (m, 1H), 2.14-2.27 (m, 2H), 1.62-1.75 (m, 2H), 1.38-1.54 (m, 2H), 1.24 (q,  $J$  = 11.2 Hz, 1H), 0.78-1.13 (m, 2H), 0.96 (d,  $J$  = 7.0 Hz, 3H), 0.90 (d,  $J$  = 6.4 Hz, 3H), 0.86 (d,  $J$  = 7.0 Hz, 3H);  $[\alpha]_{\text{D}}^{23}$  = -35.5° (chloroform, literature with 90% de: -21.0° in benzene).

***(S<sub>p</sub>)-Menthyl phenyl-H-phosphinate 1:1***

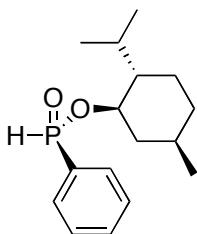

To a solution of *N*-chlorosuccinimide (110 mg, 0.82 mmol, 1.5 equiv) in dichloromethane (5 mL) at -78°C and under  $\text{N}_2$  was added dropwise a solution of dimethyl sulfide (0.06 mL, 0.82 mmol, 1.5 equiv) in dichloromethane (1 mL). After 10 minutes at -78°C, a solution of *(R<sub>p</sub>)-Menthyl (hydroxymethyl)phenylphosphinate* (170 mg, 0.55 mmol, 1 equiv, >99% de) in dichloromethane (2 mL) was added over 20 minutes. After 1h at -78°C, triethylamine (0.38 mL, 2.74 mmol, 5 equiv) was added over 15 minutes and the reaction was allowed to warm up to rt. After 1h at rt, water was added and the two layers were separated. The aqueous layer was extracted with dichloromethane (X2). The combined organic layer was dried over  $\text{MgSO}_4$ , filtered and concentrated under vacuum. The crude obtained was purified by column chromatography (hexane/ethyl acetate 6:4) to afford the product as a colorless oil (125 mg, 81%, > 99% de).  $^{31}\text{P}$  NMR (162 MHz,  $\text{CDCl}_3$ ):  $\delta$  = 22.4 (d,  $J$  = 557 Hz);  $^1\text{H}$  NMR (400 MHz,  $\text{CDCl}_3$ ):  $\delta$  = 7.67-7.82 (m, 2H), 7.68 (d,  $J$  = 557 Hz, 1H), 7.42-7.62 (m, 3H), 4.18-4.32 (m, 1H), 2.25-2.35 (m, 1H), 2.02-2.16 (m, 1H), 1.62-1.75 (m, 2H), 1.22-1.58 (m, 3H), 0.80-1.14 (m, 2H), 0.95 (d,  $J$  = 6.4 Hz, 3H), 0.88 (d,  $J$  = 7.0 Hz, 3H), 0.67 (d,  $J$  = 7.0 Hz, 3H);  $[\alpha]_{\text{D}}^{23}$  = -77.4° (chloroform, literature with 70% de: -89.6° in benzene).

***(S<sub>p</sub>)-Menthyl methyl-H-phosphinate 16:1***

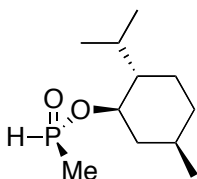

To a solution of *N*-chlorosuccinimide (470 mg, 3.5 mmol, 3 equiv) in dichloromethane (35 mL) at -78°C and under  $\text{N}_2$  was added dropwise a solution of dimethyl sulfide (0.26 mL, 3.5 mmol, 3 equiv) in dichloromethane (3 mL). After 10 minutes at -78°C, a solution of *(R<sub>p</sub>)-10* (290 mg, 1.17 mmol, 1 equiv, >99% de) in dichloromethane (5 mL) was added over 20 minutes. After 1h at -78°C, triethylamine (0.81 mL, 5.84 mmol, 5 equiv) was added over 15 minutes and the reaction was stirred for 30 minutes at -78°C. After warming up the reaction to rt, water was added and the two layers were separated. The aqueous layer was extracted with dichloromethane (X2). The combined organic layer was dried over  $\text{MgSO}_4$ , filtered and concentrated under vacuum. The crude obtained was purified by column chromatography (hexane/ethyl acetate 8:2 to 4:6) to afford the product as a colorless oil (134 mg, 61%, 96% de).  $^{31}\text{P}$  NMR (162 MHz,  $\text{CDCl}_3$ ):  $\delta$  = 28.5 (dm,  $J$  = 537 Hz);  $^1\text{H}$  NMR (400 MHz,  $\text{CDCl}_3$ ):  $\delta$  = 7.33 (d,  $J$  = 537 Hz, 1H), 4.15-4.29 (m, 1H), 2.06-2.20 (m, 2H), 1.62-1.73 (m, 2H), 1.52 (d,  $J$  = 15.2 Hz, 3H), 1.24-1.58 (m, 2H), 1.14 (q,  $J$  = 11.4 Hz, 1H), 0.93 (d,  $J$  = 6.2 Hz, 6H), 0.78-1.10 (m, 2H), 0.83 (d,  $J$  = 7.1 Hz, 3H);  $^{13}\text{C}$  NMR (101 MHz,  $\text{CDCl}_3$ ):  $\delta$  = 76.8 (d,  $J_{\text{POC}}$  = 7.2 Hz), 48.4 (d,  $J_{\text{POCC}}$  = 6.1 Hz), 41.8, 34.0, 31.4, 29.6, 25.7, 23.1, 22.0, 20.8, 15.9, 15.3 (d,  $J_{\text{PC}}$  = 95.6 Hz);  $[\alpha]_{\text{D}}^{23}$  = -92.2° (chloroform, literature: -96.6° in benzene).

**(*S<sub>p</sub>*)-Menthyl-1-naphthyl-*H*-phosphinate 17:<sup>1</sup>**

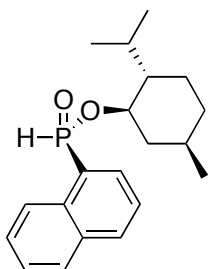

To a solution of *N*-chlorosuccinimide (100 mg, 0.75 mmol, 3 equiv) in dichloromethane (15 mL) at -78°C and under N<sub>2</sub> was added dropwise a solution of dimethyl sulfide (0.055 mL, 0.75 mmol, 3 equiv) in dichloromethane (2 mL). After 10 minutes at -78°C, a solution of (*R<sub>p</sub>*)-5 (90 mg, 0.25 mmol, 1 equiv, 94% de) in dichloromethane (2 mL) was added over 20 minutes. After 1h at -78°C, triethylamine (0.38 mL, 2.74 mmol, 5 equiv) was added over 15 minutes and the reaction was stirred for 30 minutes at -78°C. After warming up the reaction to rt, water was added and the two layers were separated. The aqueous layer was extracted with dichloromethane (X2). The combined organic layer was dried over MgSO<sub>4</sub>, filtered and concentrated under vacuum. The crude obtained was purified by column chromatography (hexane/ethyl acetate 9:1 to 7:3) to afford the product as a colorless oil (72 mg, 87%, 94% de). <sup>31</sup>P NMR (162 MHz, CDCl<sub>3</sub>): δ = 23.3 (dm, *J* = 557 Hz); <sup>1</sup>H NMR (400 MHz, CDCl<sub>3</sub>): δ = 8.45-8.51 (m, 1H), 7.99-8.10 (m, 2H), 8.05 (d, *J* = 557 Hz, 1H), 7.90-7.96 (m, 1H), 7.54-7.67 (m, 3H), 4.31-4.44 (m, 1H), 2.34-2.44 (m, 1H), 2.05 (dq, *J* = 2.6 and 7.0 Hz, 1H), 1.61-1.74 (m, 2H), 1.24-1.56 (m, 3H), 0.97 (d, *J* = 6.4 Hz, 3H), 0.75-1.10 (m, 2H), 0.80 (d, *J* = 7.0 Hz, 3H), 0.61 (d, *J* = 6.7 Hz, 3H); <sup>13</sup>C NMR (101 MHz, CDCl<sub>3</sub>): δ = 133.6 (d, *J*<sub>PCCC</sub> = 2.8 Hz), 133.4 (d, *J*<sub>PCC</sub> = 10.5 Hz), 132.5 (d, *J*<sub>PCCC</sub> = 10.0 Hz), 131.7 (d, *J*<sub>PCCC</sub> = 14.4 Hz), 128.9 (d, *J*<sub>PCCCC</sub> = 1.7 Hz), 127.5, 126.7 (d, *J*<sub>PC</sub> = 132 Hz), 126.7, 125.2 (d, *J*<sub>PCCC</sub> = 7.2 Hz), 124.6 (d, *J*<sub>PCC</sub> = 16.6 Hz), 77.8 (d, *J*<sub>POC</sub> = 7.1 Hz), 48.5 (d, *J*<sub>POCC</sub> = 6.7 Hz), 43.5, 42.2 (d, *J*<sub>POCC</sub> = 1.1 Hz), 34.0, 31.6, 25.3, 22.8, 22.0, 20.8, 15.4; [α]<sub>D</sub><sup>23</sup> = -74.0° (chloroform).

**(*S<sub>p</sub>*)-Menthyl cinnamyl-*H*-phosphinate 18:<sup>1</sup>**

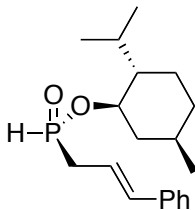

To a solution of *N*-chlorosuccinimide (200 mg, 1.5 mmol, 3 equiv) in dichloromethane (20 mL) at -78°C and under N<sub>2</sub> was added dropwise a solution of dimethyl sulfide (0.11 mL, 1.5 mmol, 3 equiv) in dichloromethane (3 mL). After 10 minutes at -78°C, a solution of (*R<sub>p</sub>*)-4 (175 mg, 0.5 mmol, 1 equiv, >99% de) in dichloromethane (3 mL) was added over 20 minutes. After 1h at -78°C, triethylamine (0.35 mL, 2.5 mmol, 5 equiv) was added over 15 minutes and the reaction was stirred for 30 minutes at -78°C. After warming up to rt, water was added and the two layers were separated. The aqueous layer was then extracted with dichloromethane (X2). The combined organic layer was dried over MgSO<sub>4</sub>, filtered and concentrated under vacuum. The crude obtained was purified by column chromatography (hexane/ethyl acetate 9:1 to 7:3) to afford the product as a colorless oil (132 mg, 82%, > 99% de). <sup>31</sup>P NMR (121.47 MHz, CDCl<sub>3</sub>): δ = 30.9 (dm, *J* = 539 Hz); <sup>1</sup>H NMR (300 MHz, CDCl<sub>3</sub>): δ = 7.20-7.41 (m, 5H), 7.17 (d, *J* = 539 Hz, 1H), 6.56 (dd, *J* = 5.9 and 15.8 Hz, 1H), 6.05-6.20 (m, 1H), 4.37-4.63 (m, 1H), 2.80 (dd, *J* = 7.6 and 18.5 Hz, 2H), 2.06-2.24 (m, 2H), 1.62-1.73 (m, 2H), 1.34-1.55 (m, 2H), 1.15 (q, *J* = 11.4 Hz, 1H), 0.75-1.12 (m, 2H), 0.92 (d, *J* = 6.5 Hz, 3H), 0.91 (d, *J* = 7.0 Hz, 3H), 0.82 (d, *J* = 7.0 Hz, 3H); <sup>13</sup>C NMR (75.46 MHz, CDCl<sub>3</sub>): δ = 136.8 (d, *J*<sub>PCCCC</sub> = 3.3 Hz), 135.8 (d, *J*<sub>PCC</sub> = 14.4 Hz), 128.6 (d, *J* = 1.1 Hz, 2C), 127.8, 126.2 (d, *J*<sub>PCCCC</sub> = 2.3 Hz, 2C), 117.0 (d, *J*<sub>PCC</sub> = 10.0 Hz), 77.3 (d, *J*<sub>POC</sub> = 7.8 Hz), 48.4 (d, *J*<sub>POCC</sub> = 6.1 Hz), 41.8, 34.3 (d, *J*<sub>PC</sub> = 91.8 Hz), 34.0, 31.4, 25.7, 23.1, 21.9, 20.8, 15.8; HRMS (EI<sup>+</sup>) *m/z* calcd for C<sub>19</sub>H<sub>29</sub>O<sub>2</sub>P ([M]<sup>+</sup>) 320.1905, found 320.1907; [α]<sub>D</sub><sup>23</sup> = -89.8° (chloroform).

***(S<sub>p</sub>)-Menthyl (3-phenylpropyl)-H-phosphinate 19:***

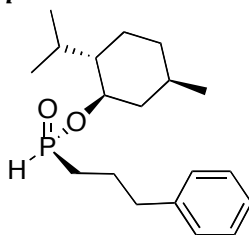

To a solution of *N*-chlorosuccinimide (721 mg, 5.4 mmol, 3 equiv) in dichloromethane (30 mL) at -78°C and under N<sub>2</sub> was added dropwise a solution of dimethyl sulfide (0.4 mL, 5.4 mmol, 3 equiv) in dichloromethane (5 mL). After 10 minutes at -78°C, a solution of *(R<sub>p</sub>)-menthyl hydroxymethyl(3-phenylpropyl)-H-phosphinate* (630 mg, 1.8 mmol, 1 equiv, 98% de) in dichloromethane (5 mL) was added over 20 minutes. After 1h at -78°C, triethylamine (1.25 mL, 9 mmol, 5 equiv) was added over 15 minutes and the reaction was allowed to warm up to rt. After 1h at rt, water was added and the two layers were separated. The aqueous layer was extracted with dichloromethane (X2). The combined organic layer was dried over MgSO<sub>4</sub>, filtered and concentrated under vacuum. The crude obtained was purified by column chromatography (dichloromethane/acetone 99:1 to 97:3) to afford the product as a colorless oil (554 mg, 96%, 96% de). <sup>31</sup>P NMR (162 MHz, CDCl<sub>3</sub>): δ = 33.3 (d, sextuplet, *J* = 12.7 and 528 Hz); <sup>1</sup>H NMR (400 MHz, CDCl<sub>3</sub>): δ = 7.16-7.23 (m, 2H), 7.05-7.13 (m, 3H), 7.08 (d, *J* = 528 Hz, 1H), 4.07-4.19 (m, 1H), 2.62 (t, *J* = 7.4 Hz, 2H), 1.99-2.10 (m, 2H), 1.77-1.91 (m, 2H), 1.53-1.73 (m, 4H), 1.21-1.43 (m, 2H), 1.02 (q, *J* = 11.6 Hz, 1H), 0.94 (dq, *J* = 3.0 and 12.4 Hz, 1H), 0.84 (d, *J* = 6.8 Hz, 6H), 0.69-0.85 (m, 1H), 0.74 (d, *J* = 6.9 Hz, 3H); <sup>13</sup>C NMR (101 MHz, CDCl<sub>3</sub>): δ = 140.7, 128.4 (2C), 128.4 (2C), 126.1, 76.7 (d, *J*<sub>POC</sub> = 7.4 Hz), 48.3 (d, *J*<sub>POCC</sub> = 5.9 Hz), 41.6, 36.2 (d, *J*<sub>PCC</sub> = 16.0 Hz), 33.9, 31.3, 28.1 (d, *J*<sub>PC</sub> = 95.0 Hz), 25.6, 22.9, 22.4 (d, *J*<sub>PCCC</sub> = 2.5 Hz), 21.9, 20.8, 15.7; [α]<sub>D</sub><sup>23</sup> = -27.3° (chloroform).

***(S<sub>p</sub>)-Menthyl cyclohexyl-H-phosphinate 20:***

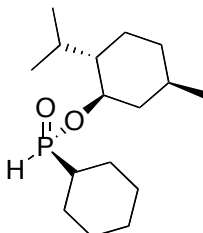

To a solution of *N*-chlorosuccinimide (400 mg, 3 mmol, 3 equiv) in dichloromethane (25 mL) at -78°C and under N<sub>2</sub> was added dropwise a solution of dimethyl sulfide (0.22 mL, 3 mmol, 3 equiv) in dichloromethane (3 mL). After 10 minutes at -78°C, a solution of *(S<sub>p</sub>)-methyl (hydroxymethyl)cyclohexylphosphinate* (316 mg, 1 mmol, 1 equiv, > 99% de) in dichloromethane (5 mL) was added over 20 minutes. After 1h at -78°C, triethylamine (0.70 mL, 5 mmol, 5 equiv) was added over 15 minutes and the reaction was allowed to warm up to rt. After 1h at rt, water was added and the two layers were separated. The aqueous layer was then extracted with dichloromethane (X2). The combined organic layer was dried over MgSO<sub>4</sub>, filtered and concentrated under vacuum. The crude obtained was purified by column chromatography (dichloromethane/acetone 100:0 to 90:10) to afford the product as a colorless oil (181 mg, 63%, > 99% de). <sup>31</sup>P NMR (162 MHz, CDCl<sub>3</sub>): δ = 37.1 (s); <sup>1</sup>H NMR (400 MHz, CDCl<sub>3</sub>): δ = 6.84 (d, *J* = 512 Hz, 1H), 4.08-4.17 (m, 1H), 2.01-2.14 (m, 2H), 1.71-1.90 (m, 4H), 1.53-1.69 (m, 4H), 1.10-1.47 (m, 7H), 1.04 (q, *J* = 11.2 Hz, 1H), 0.99 (dq, *J* = 2.4 and 12.6 Hz, 1H), 0.78-0.95 (m, 1H), 0.89 (d, *J* = 7.0 Hz, 3H), 0.88 (d, *J* = 6.5 Hz, 3H), 0.78 (d, *J* = 6.9 Hz, 3H); <sup>13</sup>C NMR (101 MHz, CDCl<sub>3</sub>): δ = 76.4 (d, *J*<sub>POC</sub> = 7.8 Hz), 48.4 (d, *J*<sub>POCC</sub> = 5.8 Hz), 41.5 (d, *J*<sub>POCC</sub> = 1.2 Hz), 37.1 (d, *J*<sub>PC</sub> = 97.7 Hz), 34.0, 31.3, 25.8 (2C), 25.6 (d, *J*<sub>PCC</sub> = 10.7 Hz), 25.6 (d, *J*<sub>PCC</sub> = 9.5 Hz), 24.1 (2C), 22.9, 21.9, 20.8, 15.6.

***(S<sub>p</sub>)-Menthyl triphenylmethyl-H-phosphinate 21:***



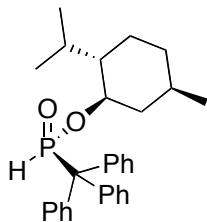

To a solution of *N*-chlorosuccinimide (100 mg, 0.75 mmol, 3 equiv) in dichloromethane (20 mL) at -78°C and under N<sub>2</sub> was added dropwise a solution of dimethyl sulfide (0.06 mL, 0.75 mmol, 3 equiv) in dichloromethane (2 mL). After 10 minutes at -78°C, a solution of (*R<sub>p</sub>*)-13 (119 mg, 0.25 mmol, 1 equiv, 95% de) in dichloromethane (3 mL) was added over 20 minutes. After 1h at -78°C, triethylamine (0.17 mL, 1.25 mmol, 5 equiv) was added over 15 minutes and the reaction was allowed to warm up to rt. After 1h at rt, water was added and the two layers were separated. The aqueous layer was extracted with dichloromethane (X2). The combined organic layer was dried over MgSO<sub>4</sub>, filtered and concentrated under vacuum. The crude obtained was purified by column chromatography (dichloromethane/acetone 100:0 to 97:3) to afford the product as a white solid (93 mg, 83%, 95% de). <sup>31</sup>P NMR (162 MHz, CDCl<sub>3</sub>): δ = 35.4 (dd, *J* = 4.4 and 550 Hz); <sup>1</sup>H NMR (400 MHz, CDCl<sub>3</sub>): δ = 7.66 (d, *J* = 549 Hz, 1H), 7.27-7.37 (m, 15H), 4.21-4.32 (m, 1H), 2.03-2.11 (m, 1H), 1.57-1.69 (m, 3H), 1.35-1.48 (m, 1H), 1.15-1.24 (m, 1H), 1.00 (q, *J* = 11.4 Hz, 1H), 0.98 (dq, *J* = 3.2 and 14.7 Hz, 1H), 0.89 (d, *J* = 6.6 Hz, 3H), 0.81 (dq, *J* = 3.4 and 12.1 Hz, 1H), 0.74 (d, *J* = 7.1 Hz, 3H), 0.70 (d, *J* = 6.9 Hz, 3H); <sup>13</sup>C NMR (101 MHz, CDCl<sub>3</sub>): δ = 140.5 (d, *J<sub>PCC</sub>* = 3.2 Hz, 3C), 130.6 (d, *J<sub>PCCC</sub>* = 6.9 Hz, 6C), 128.2 (s, 6C), 127.2 (d, *J<sub>PCCCC</sub>* = 1.8 Hz, 3C), 78.7 (d, *J<sub>POC</sub>* = 8.7 Hz), 62.0 (d, *J<sub>PC</sub>* = 90.7 Hz), 48.6 (d, *J<sub>POCC</sub>* = 5.8 Hz), 41.1 (d, *J<sub>POCC</sub>* = 1.9 Hz), 33.9, 31.5, 24.8, 22.6, 22.0, 20.9, 15.5; [α]<sub>D</sub><sup>23</sup> = -21.1<sup>0</sup> (chloroform).

**(*S<sub>p</sub>*)-Menthyl mesityl-*H*-phosphinate 22:**

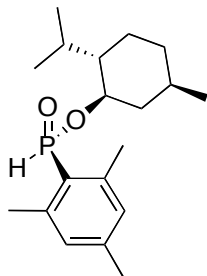

To a solution of *N*-chlorosuccinimide (400 mg, 3 mmol, 3 equiv) in dichloromethane (40 mL) at -78°C and under N<sub>2</sub> was added dropwise a solution of dimethyl sulfide (0.22 mL, 3 mmol, 3 equiv) in dichloromethane (3 mL). After 10 minutes at -78°C, a solution of (*R<sub>p</sub>*)-8b (352 mg, 1 mmol, 1 equiv, 94% de) in dichloromethane (5 mL) was added over 20 minutes. After 1h at -78°C, triethylamine (0.7 mL, 5 mmol, 5 equiv) was added over 15 minutes and the reaction was allowed to warm up to rt. After 1h at rt, water was added and the two layers were separated. The aqueous layer was extracted with dichloromethane (X2). The combined organic layer was dried over MgSO<sub>4</sub>, filtered and concentrated under vacuum. The crude obtained was purified by column chromatography (dichloromethane/acetone 100:0 to 97:3) to afford the product as a colorless oil (275 mg, 85%, 94% de). <sup>31</sup>P NMR (162 MHz, CDCl<sub>3</sub>): δ = 18.7 (d, *J* = 548 Hz); <sup>1</sup>H NMR (400 MHz, CDCl<sub>3</sub>): δ = 8.09 (d, *J* = 548 Hz, 1H), 6.89 (s, 1H), 6.88 (s, 1H), 4.27-4.37 (m, 1H), 2.58 (s, 6H), 2.27-2.34 (m, 1H), 2.31 (s, 3H), 2.17 (dq, *J* = 2.7 and 7.0 Hz, 1H), 1.65-1.74 (m, 2H), 1.45-1.57 (m, 1H), 1.34-1.43 (m, 1H), 1.22 (q, *J* = 11.3 Hz, 1H), 1.06 (dq, *J* = 3.2 and 12.5 Hz, 1H), 0.77-0.99 (m, 1H), 0.97 (d, *J* = 6.6 Hz, 3H), 0.90 (d, *J* = 7.1 Hz, 3H), 0.80 (d, *J* = 6.9 Hz, 3H); <sup>13</sup>C NMR (101 MHz, CDCl<sub>3</sub>): δ = 142.2 (d, *J<sub>PCCCC</sub>* = 1.9 Hz), 141.5 (d, *J<sub>PCCC</sub>* = 11.4 Hz, 2C), 130.0 (d, *J<sub>PCC</sub>* = 12.2 Hz, 2C), 123.7 (d, *J<sub>PC</sub>* = 136 Hz), 76.8 (d, *J<sub>POC</sub>* = 7.0 Hz), 48.4 (d, *J<sub>POCC</sub>* = 6.3 Hz), 41.6, 34.0, 31.4, 25.3, 22.8, 21.9, 21.1, 20.9, 20.8 (2C), 15.4; [α]<sub>D</sub><sup>22</sup> = -28.8<sup>0</sup> (chloroform).

**(*S<sub>p</sub>*)-Menthyl (benzoxymethyl)phenylphosphinate 23:**

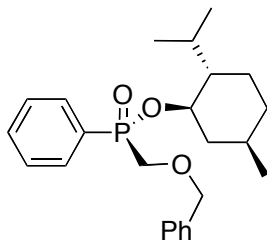

To a suspension of NaH (120 mg, 3 mmol, 1.5 equiv, 60% in mineral oil) in dichloromethane (15 mL) was added at 0°C under N<sub>2</sub> a solution of (*S<sub>p</sub>*)-3 (621 mg, 2 mmol, 1 equiv, >99% de) in dichloromethane (5 mL). After 30 minutes at 0°C, benzylbromide (0.29 mL, 2.4 mmol, 1.2 equiv) was added. The reaction was stirred for 4 hours at rt. A saturated solution of NH<sub>4</sub>Cl was added and the two layers were separated. The aqueous layer was extracted with dichloromethane (3X). The combined organic layers was dried over MgSO<sub>4</sub>, filtered and concentrated under vacuum. The crude obtained was purified by column chromatography (hexane/ethyl acetate 9:1 to 7:3) to afford the product as colorless oil (801 mg, 100%, >99% de). <sup>31</sup>P NMR (162 MHz, CDCl<sub>3</sub>): δ = 31.3 (s); <sup>1</sup>H NMR (400 MHz, CDCl<sub>3</sub>): δ = 7.80-7.91 (m, 2H), 7.52-7.62 (m, 1H), 7.42-7.52 (m, 2H), 7.24-7.34 (m, 3H), 7.13-7.21 (m, 2H), 4.56 (s, 2H), 4.29-4.43 (m, 1H), 3.75-3.94 (m, 2H), 2.18-2.33 (m, 1H), 1.90-2.01 (m, 1H), 1.56-1.72 (m, 2H), 1.22-1.48 (m, 2H), 0.74-1.17 (m, 3H), 0.92 (d, *J* = 7.0 Hz, 3H), 0.82 (d, *J* = 6.7 Hz, 3H), 0.79 (d, *J* = 6.4 Hz, 3H); <sup>13</sup>C NMR (100.62 MHz, CDCl<sub>3</sub>): δ = 137.0, 132.3 (d, *J*<sub>PCCC</sub> = 2.7 Hz), 131.8 (d, *J*<sub>PCCC</sub> = 10.0 Hz, 2C), 131.2 (d, *J*<sub>PC</sub> = 129 Hz), 128.3 (2C), 128.3 (d, *J*<sub>PCC</sub> = 12.7 Hz, 2C), 127.8 (3C), 77.2 (d, *J*<sub>POC</sub> = 7.2 Hz), 75.0 (d, *J*<sub>POC</sub> = 12.2 Hz), 67.1 (d, *J*<sub>PC</sub> = 119 Hz), 48.7 (d, *J*<sub>POCC</sub> = 6.1 Hz), 43.4, 34.0, 31.5, 25.5, 22.8, 21.9, 21.1, 15.7; HRMS (EI+) *m/z* calcd for C<sub>24</sub>H<sub>34</sub>O<sub>3</sub>P ([M+H]<sup>+</sup>) 401.2244, found 401.2246; [α]<sub>D</sub><sup>25</sup> = -12.2° (chloroform).

**(*S<sub>p</sub>*)-Menthyl (benzoxymethyl)phenylphosphinate 23:**

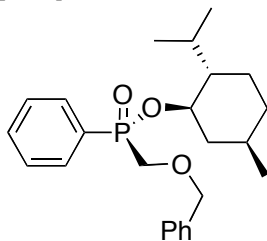

To a solution of (*S<sub>p</sub>*)-3 (3.1 g, 10 mmol, 1 equiv, >99% de) in acetonitrile (30 mL) was added benzylbromide (6 mL, 50 mmol, 5 equiv) followed by potassium fluoride on alumina (7.25 g, 50 mmol, 5 equiv, 40% w.t). The reaction was stirred for 3 days at rt under N<sub>2</sub>. The suspension was filtered through celite. The solid was washed twice with acetonitrile and the filtrate was concentrated under vacuum. The crude obtained was purified by column chromatography (dichloromethane/acetone 100:0 to 95:5) to afford the product as colorless oil (3.97 g, 99%, >99% de). <sup>31</sup>P NMR (162 MHz, CDCl<sub>3</sub>): δ = 31.3 (s); <sup>1</sup>H NMR (400 MHz, CDCl<sub>3</sub>): δ = 7.80-7.91 (m, 2H), 7.52-7.62 (m, 1H), 7.42-7.52 (m, 2H), 7.24-7.34 (m, 3H), 7.13-7.21 (m, 2H), 4.56 (s, 2H), 4.29-4.43 (m, 1H), 3.75-3.94 (m, 2H), 2.18-2.33 (m, 1H), 1.90-2.01 (m, 1H), 1.56-1.72 (m, 2H), 1.22-1.48 (m, 2H), 0.74-1.17 (m, 3H), 0.92 (d, *J* = 7.0 Hz, 3H), 0.82 (d, *J* = 6.7 Hz, 3H), 0.79 (d, *J* = 6.4 Hz, 3H); <sup>13</sup>C NMR (100.62 MHz, CDCl<sub>3</sub>): δ = 137.0, 132.3 (d, *J*<sub>PCCC</sub> = 2.7 Hz), 131.8 (d, *J*<sub>PCCC</sub> = 10.0 Hz, 2C), 131.2 (d, *J*<sub>PC</sub> = 129 Hz), 128.3 (2C), 128.3 (d, *J*<sub>PCC</sub> = 12.7 Hz, 2C), 127.8 (3C), 77.2 (d, *J*<sub>POC</sub> = 7.2 Hz), 75.0 (d, *J*<sub>POC</sub> = 12.2 Hz), 67.1 (d, *J*<sub>PC</sub> = 119 Hz), 48.7 (d, *J*<sub>POCC</sub> = 6.1 Hz), 43.4, 34.0, 31.5, 25.5, 22.8, 21.9, 21.1, 15.7; HRMS (EI+) *m/z* calcd for C<sub>24</sub>H<sub>34</sub>O<sub>3</sub>P ([M+H]<sup>+</sup>) 401.2244, found 401.2246; [α]<sub>D</sub><sup>25</sup> = -12.2° (chloroform).

**(*S<sub>p</sub>*)-Menthyl [(*tert*-butyldimethylsilyloxy)methyl]phenylphosphinate 24:**

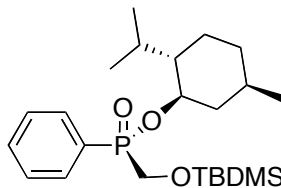

To a solution of (*S<sub>p</sub>*)-3 (3.1 g, 10 mmol, 1 equiv, >99% de) in dichloromethane (20 mL) was added at 0°C under N<sub>2</sub> imidazole (1.5 mL, 27 mmol, 2.7 equiv) followed by *tert*-butyldimethylsilyl chloride (2.6 mL, 15 mmol, 1.5 equiv). The ice bath was removed and the reaction was stirred for 16 h under N<sub>2</sub> at rt. The solvent was then removed under vacuum and the crude obtained was dissolved in ethyl acetate. The organic layer was washed with NaHCO<sub>3</sub> and brine, dried over MgSO<sub>4</sub>, filtered and concentrated under vacuum. The crude obtained was purified by column chromatography (dichloromethane/acetone 100:0 to 95:5) to afford the product as colorless oil (4.23 g, 100%, > 99% de). <sup>31</sup>P NMR (162 MHz, CDCl<sub>3</sub>): δ = 35.6 (s); <sup>1</sup>H NMR (400 MHz, CDCl<sub>3</sub>): δ = 7.83-7.90 (m, 2H), 7.53-7.58 (m, 1H), 7.43-7.50 (m, 2H), 4.31-4.41 (m, 1H), 4.03 (dd, *J* = 9.3 and 13.8 Hz, 1H), 3.94 (dd, *J* = 4.6 and 13.8 Hz, 1H), 2.34 (dq, *J* = 2.5 and 7.0 Hz, 1H), 1.98-2.05 (m, 1H), 1.61-1.73 (m, 2H), 1.32-1.48 (m, 2H), 1.12 (q, *J* = 11.1 Hz, 1H), 0.85-1.09 (m, 2H), 0.97 (d, *J* = 7.1 Hz, 3H), 0.89 (d, *J* = 6.9 Hz, 3H), 0.82 (d, *J* = 6.8 Hz, 3H), 0.81 (s, 9H), -0.06 (s, 3H), -0.10 (s, 3H); <sup>13</sup>C NMR (101 MHz, CDCl<sub>3</sub>): δ = 132.1 (d, *J*<sub>PCCC</sub> = 2.8 Hz), 132.1 (d, *J*<sub>PCCC</sub> = 9.7 Hz, 2C), 130.8 (d, *J*<sub>PC</sub> = 128 Hz), 128.0 (d, *J*<sub>PCC</sub> = 12.5 Hz, 2C), 76.9 (d, *J*<sub>POC</sub> = 7.5 Hz), 61.0 (d, *J*<sub>PC</sub> = 123 Hz), 48.7 (d, *J*<sub>POCC</sub> = 6.1 Hz), 43.5, 34.0, 31.5, 25.6 (3C), 25.4, 22.9, 21.9, 21.1, 18.2, 15.8, -5.9, -6.0; HRMS (EI<sup>+</sup>) *m/z* calcd for C<sub>23</sub>H<sub>42</sub>O<sub>3</sub>PSi ([M+H]<sup>+</sup>) 425.2641, found 425.2629; [α]<sub>D</sub><sup>25</sup> = -14.1° (chloroform).

**(*S<sub>p</sub>*)-Menthyl (acetoxymethyl)phenylphosphinate 25:<sup>2</sup>**

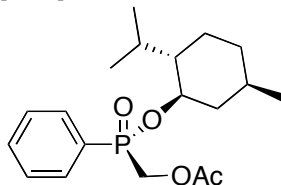

To a solution of (*S<sub>p</sub>*)-3 (1.55 g, 5 mmol, 1 equiv, >99% de) in dichloromethane (10 mL) was slowly added at 0°C and under N<sub>2</sub> triethylamine (0.87 mL, 6.25 mmol, 1.25 equiv) followed by acetic anhydride (0.57 mL, 6 mmol, 1.2 equiv). The ice bath was removed and the reaction mixture was stirred at rt for 16 h. The solvent was removed under vacuum and the residue obtained was solubilized in ethyl acetate. The organic layer was washed with a saturated aqueous solution of NaHCO<sub>3</sub> and brine, dried over MgSO<sub>4</sub>, filtered and concentrated under vacuum to afford the product as a colorless oil (1.73 g, 98%, >99% de). <sup>31</sup>P NMR (162 MHz, CDCl<sub>3</sub>): δ = 30.3 (s).

**(*S<sub>p</sub>*)-Menthyl [(tosyloxy)methyl]phenylphosphinate 26:<sup>4</sup>**

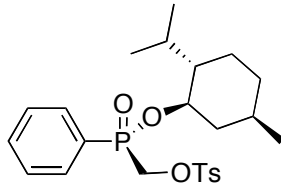

To a solution of (*S<sub>p</sub>*)-3 (3.1 g, 10 mmol, 1 equiv, >99% de) in dichloromethane (20 mL) under N<sub>2</sub> was added *N,N*-diisopropylethylamine (4.4 mL, 25 mmol, 2.5 equiv). The mixture was cooled down to 0°C and a solution of tosyl chloride (2.89 g, 20 mmol, 2 equiv) in dichloromethane (15 mL) was added over 1h. The ice-bath was removed and the solution was stirred for 20h at rt. A saturated aqueous solution of NaHCO<sub>3</sub> was added and the two layers were separated. The aqueous layer was extracted with dichloromethane (2X). The combined organic layers was dried over MgSO<sub>4</sub>, filtered and concentrated under vacuum. The residue obtained was purified by column chromatography (hexanes/ethyl acetate 9:1 to 7:3) to afford the product as colorless crystals (4.6 g, 99%, > 99% de). *Mp* = 68-70°C; <sup>31</sup>P NMR (162 MHz, CDCl<sub>3</sub>): δ = 29.3 (s); <sup>1</sup>H NMR (400 MHz, CDCl<sub>3</sub>): δ = 7.67-7.75 (m,

2H), 7.49-7.56 (m, 3H), 7.36-7.43 (m, 2H), 7.17-7.22 (m, 2H), 4.10-4.35 (m, 3H), 2.35 (s, 3H), 2.10 (dq,  $J = 2.6$  and  $7.0$  Hz, 1H), 1.86-1.93 (m, 1H), 1.53-1.66 (m, 2H), 1.22-1.42 (m, 2H), 1.06 (q,  $J = 11.1$  Hz, 1H), 0.76-1.06 (m, 2H), 0.87 (d,  $J = 7.0$  Hz, 3H), 0.75 (d,  $J = 6.8$  Hz, 3H), 0.74 (d,  $J = 6.5$  Hz, 3H);  $^{13}\text{C}$  NMR (101 MHz,  $\text{CDCl}_3$ ):  $\delta = 145.2, 133.0$  (d,  $J_{\text{PCCC}} = 2.8$  Hz), 131.8 (d,  $J_{\text{PCC}} = 10.0$  Hz, 2C), 131.4, 129.9 (2C), 129.3 (d,  $J_{\text{PC}} = 137$  Hz), 128.5 (d,  $J_{\text{PCC}} = 13.3$  Hz, 2C), 128.0 (2C), 78.5 (d,  $J_{\text{POC}} = 7.4$  Hz), 64.3 (d,  $J_{\text{PC}} = 115$  Hz), 48.5 (d,  $J_{\text{POCC}} = 6.1$  Hz), 43.3, 33.9, 31.5, 25.5, 22.8, 21.8, 21.6, 21.0, 15.6; HRMS (EI+)  $m/z$  calcd for  $\text{C}_{24}\text{H}_{34}\text{O}_5\text{PS}$  ( $[\text{M}+\text{H}]^+$ ) 465.1865, found 465.1857;  $[\alpha]_{\text{D}}^{25} = -20.1^\circ$  (chloroform).

***(S<sub>p</sub>)-Menthyl (benzoxymethyl)phenylphosphinate borane 27:***

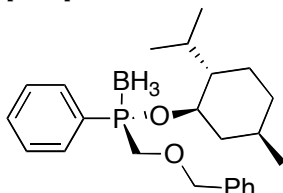

To a solution of *(S<sub>p</sub>)-23* (400 mg, 1 mmol, 1 equiv, >99% de) in benzene (5 mL) was added triethylamine (0.7 mL, 5 mmol, 5 equiv) followed by trichlorosilane (0.5 mL, 5 mmol, 5 equiv). After 2 hours at reflux under  $\text{N}_2$ , the reaction was cooled down to rt and then borane dimethylsulfide (2.5 mL, 5 mmol, 5 equiv, 2.0M solution in tetrahydrofuran) was added and the reaction was stirred for 12 hours at rt under  $\text{N}_2$ . The solvent was removed under vacuum and the crude obtained was purified by column chromatography (hexane/ethyl acetate 100:0 to 90:10) to afford the product as colorless oil (302 mg, 76%, > 99% de).  $^{31}\text{P}$  NMR (162 MHz,  $\text{CDCl}_3$ ):  $\delta = 104.7$  (d,  $J = 85.8$  Hz);  $^1\text{H}$  NMR (400 MHz,  $\text{CDCl}_3$ ):  $\delta = 7.80$ -7.87 (m, 2H), 7.53-7.59 (m, 1H), 7.46-7.52 (m, 2H), 7.27-7.36 (m, 3H), 7.19-7.24 (m, 2H), 4.54-4.62 (m, 2H), 4.18-4.28 (m, 1H), 3.87-3.98 (m, 2H), 2.23 (dq,  $J = 2.6$  and  $7.0$  Hz, 1H), 1.84-1.91 (m, 1H), 1.61-1.72 (m, 2H), 1.34-1.49 (m, 2H), 0.74-1.30 (m, 3H), 1.04 (dq,  $J = 3.6$  and  $12.5$  Hz, 1H), 0.98 (q,  $J = 11.1$  Hz, 1H), 0.95 (d,  $J = 7.0$  Hz, 3H), 0.77-0.90 (m, 1H), 0.84 (d,  $J = 6.9$  Hz, 3H), 0.82 (d,  $J = 6.6$  Hz, 3H);  $^{13}\text{C}$  NMR (100.62 MHz,  $\text{CDCl}_3$ ):  $\delta = 137.1, 131.8$  (d,  $J_{\text{PCCC}} = 2.6$  Hz), 131.5 (d,  $J_{\text{PC}} = 57.2$  Hz), 131.2 (d,  $J_{\text{PCC}} = 10.5$  Hz, 2C), 128.4 (d,  $J_{\text{PCC}} = 10.2$  Hz, 2C), 128.4 (2C), 127.8, 127.8 (2C), 80.3 (d,  $J_{\text{POC}} = 3.8$  Hz), 75.2 (d,  $J_{\text{PCOC}} = 7.8$  Hz), 69.9 (d,  $J_{\text{PC}} = 56.1$  Hz), 48.9 (d,  $J_{\text{POCC}} = 6.5$  Hz), 43.5, 34.1, 31.4, 25.4, 22.9, 22.0, 21.0, 15.9; HRMS (EI+)  $m/z$  calcd for  $\text{C}_{24}\text{H}_{35}\text{BO}_2\text{P}$  ( $[\text{M}-\text{H}]^+$ ) 397.2468, found 397.2461;  $[\alpha]_{\text{D}}^{24} = -0.9^\circ$  (chloroform).

***(R<sub>p</sub>)-Menthyl [(tert-butyldimethylsilyloxy)methyl]phenylthiophosphinate 28a:***

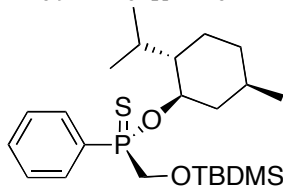

To a solution of *(S<sub>p</sub>)-24* (2.12 g, 5 mmol, 1 equiv, >99% de) in toluene (20 mL) was added Lawesson's reagent (1.21 g, 3 mmol, 0.6 equiv). The reaction mixture was stirred for 16 hours at reflux under  $\text{N}_2$ . After cooling down the reaction to rt, the solvent was concentrated under vacuum and the residue obtained was purified by column chromatography (Hexane/ethyl acetate 98:2 to 95:5) to afford the product as a yellow oil (2.05 g, 93%, > 99% de).  $^{31}\text{P}$  NMR (162 MHz,  $\text{CDCl}_3$ ):  $\delta = 82.4$  (s);  $^1\text{H}$  NMR (400 MHz,  $\text{CDCl}_3$ ):  $\delta = 7.92$ -8.01 (m, 2H), 7.49-7.55 (m, 1H), 7.41-7.48 (m, 2H), 4.45-4.56 (m, 1H), 4.13 (dd,  $J = 8.1$  and  $13.2$  Hz, 1H), 3.95 (d,  $J = 13.3$  Hz, 1H), 2.29 (dq,  $J = 2.5$  and  $7.0$  Hz, 1H), 1.79-1.87 (m, 1H), 1.60-1.73 (m, 2H), 1.32-1.53 (m, 2H), 0.75-1.13 (m, 3H), 0.95 (d,  $J = 7.0$  Hz, 3H), 0.89 (d,  $J = 6.9$  Hz, 3H), 0.82 (s, 9H), 0.78 (d,  $J = 6.5$  Hz, 3H), -0.05 (s, 3H), -0.12 (s, 3H);  $^{13}\text{C}$  NMR (101 MHz,  $\text{CDCl}_3$ ):  $\delta = 133.2$  (d,  $J_{\text{PC}} = 101$  Hz), 132.0 (d,  $J_{\text{PCC}} = 10.4$  Hz, 2C), 131.9 (d,  $J_{\text{PCCC}} = 3.0$  Hz), 127.9 (d,  $J_{\text{PCC}} = 12.6$  Hz, 2C), 77.2 (d,  $J_{\text{POC}} = 7.9$  Hz), 67.7 (d,  $J_{\text{PC}} = 99.1$  Hz), 48.5 (d,  $J_{\text{POCC}} = 7.1$  Hz), 43.4, 34.1, 31.4, 25.6 (3C), 25.3, 23.0, 22.0, 21.1, 18.2, 16.1, -5.8, -5.8; HRMS (EI+)  $m/z$  calcd for  $\text{C}_{23}\text{H}_{42}\text{O}_2\text{PSSi}$  ( $[\text{M}+\text{H}]^+$ ) 441.2412, found 441.2394;  $[\alpha]_{\text{D}}^{25} = -16.8^\circ$  (chloroform).

**(*R<sub>p</sub>*)-Menthyl (acetoxymethyl)phenylthiophosphinate 28b:**

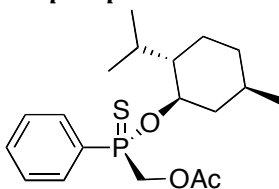

To a solution of (*S<sub>p</sub>*)-25 (1.73 g, 5 mmol, 1 equiv, >99% de) in toluene (10 mL) was added Lawesson's reagent (1.21 g, 3 mmol, 0.6 equiv). The reaction mixture was stirred for 16 hours at reflux under N<sub>2</sub>. After cooling down the reaction to rt, the solvent was concentrated under vacuum and the residue obtained was purified by column chromatography (Hexane/ethyl acetate 99:1 to 97:3) to afford the product as a colorless oil (1.85 g, 100%, > 99% de). <sup>31</sup>P NMR (162 MHz, CDCl<sub>3</sub>): δ = 78.9 (s); <sup>1</sup>H NMR (400 MHz, CDCl<sub>3</sub>): δ = 7.92-7.99 (m, 2H), 7.55-7.61 (m, 1H), 7.47-7.53 (m, 2H), 4.48-4.61 (m, 3H), 2.19 (dq, *J* = 2.7 and 7.0 Hz, 1H), 2.04 (s, 3H), 1.61-1.80 (m, 3H), 1.46-1.55 (m, 1H), 1.33-1.45 (m, 1H), 1.08 (dq, *J* = 3.4 and 13.3 Hz, 1H), 0.98 (q, *J* = 11.8 Hz, 1H), 0.98 (d, *J* = 7.0 Hz, 3H), 0.91 (d, *J* = 7.0 Hz, 3H), 0.85 (dq, *J* = 3.3 and 11.9 Hz, 1H), 0.78 (d, *J* = 6.6 Hz, 3H); <sup>13</sup>C NMR (101 MHz, CDCl<sub>3</sub>): δ = 169.8 (d, *J*<sub>POC</sub> = 7.6 Hz), 132.9 (d, *J*<sub>PC</sub> = 104 Hz), 132.4 (d, *J*<sub>PCCC</sub> = 2.8 Hz), 131.6 (d, *J*<sub>PCCC</sub> = 11.0 Hz, 2C), 128.3 (d, *J*<sub>PCC</sub> = 13.1 Hz, 2C), 77.9 (d, *J*<sub>POC</sub> = 7.5 Hz), 65.6 (d, *J*<sub>PC</sub> = 98.2 Hz), 48.4 (d, *J*<sub>POCC</sub> = 7.3 Hz), 43.2, 34.1, 31.4, 25.6, 23.0, 21.9, 21.0, 20.5, 16.0.

**(*R<sub>p</sub>*)-Menthyl (hydroxymethyl)phenylthiophosphinate 29:**

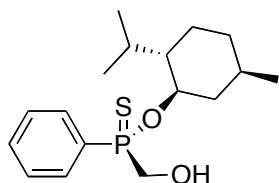

To a solution of (*R<sub>p</sub>*)-28b (1.84 g, 5 mmol, 1 equiv, >99% de) in methanol (10 mL) was added potassium carbonate (69 mg, 0.5 mmol, 0.1 equiv.) and the mixture was stirred for 16 h at rt. The solvent was removed under vacuum and then the residue was solubilized in ethyl acetate. The organic layer was washed with saturated NaHCO<sub>3</sub> (150 mL) and brine (150 mL), dried over MgSO<sub>4</sub>, filtered and concentrated under vacuum to afford the product as a white solid (1.63 g, 100%, 96% de). Mp = 67-68 °C; <sup>31</sup>P NMR (162 MHz, CDCl<sub>3</sub>): δ = 83.6 (s); <sup>1</sup>H NMR (400 MHz, CDCl<sub>3</sub>): δ = 7.87-7.97 (m, 2H), 7.51-7.58 (m, 1H), 7.43-7.50 (m, 2H), 4.47 (dd, *J* = 4.4 and 10.6 Hz, 1H), 3.84-4.03 (m, 2H), 2.75 (s, 1H), 2.17 (dq, *J* = 2.6 and 7.0 Hz, 1H), 1.58-1.77 (m, 3H), 1.43-1.52 (m, 1H), 1.29-1.41 (m, 1H), 1.05 (dq, *J* = 3.0 and 12.9 Hz, 1H), 0.76-1.01 (m, 2H), 0.95 (d, *J* = 7.0 Hz, 3H), 0.88 (d, *J* = 6.9 Hz, 3H), 0.75 (d, *J* = 6.6 Hz, 3H); <sup>13</sup>C NMR (101 MHz, CDCl<sub>3</sub>): δ = 133.0 (d, *J*<sub>PC</sub> = 98.4 Hz), 132.4 (d, *J*<sub>PCCC</sub> = 3.0 Hz), 131.4 (d, *J*<sub>PCCC</sub> = 10.6 Hz, 2C), 128.4 (d, *J*<sub>PCC</sub> = 12.9 Hz, 2C), 77.9 (d, *J*<sub>POC</sub> = 8.3 Hz), 65.2 (d, *J*<sub>PC</sub> = 88.0 Hz), 48.5 (d, *J*<sub>POCC</sub> = 7.1 Hz), 43.2, 34.1, 31.4, 25.6, 23.0, 22.0, 21.0, 16.0; HRMS (EI+) *m/z* calcd for C<sub>17</sub>H<sub>27</sub>O<sub>2</sub>PS ([M]<sup>+</sup>) 326.1469, found 326.1466; [α]<sub>D</sub><sup>25</sup> = -24.9° (chloroform).

**(*S<sub>p</sub>*)-Menthyl (iodomethyl)phenylphosphinate 30:<sup>4</sup>**

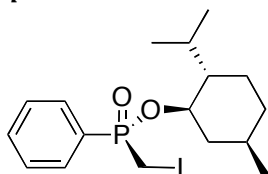

To a solution of (*S<sub>p</sub>*)-26 (4.78 g, 12.5 mmol, 1 equiv, >99% de) in acetone (40 mL) was added sodium iodide (7.5 g, 50 mmol, 4 equiv). The reaction mixture was stirred for 24h at reflux. The solvent was removed under vacuum and the residue obtained was dissolved in dichloromethane. The organic layer was washed with brine, dried over MgSO<sub>4</sub>, filtered and concentrated under vacuum. The solid obtained was purified by column chromatography (dichloromethane/ethyl acetate 10:0 to 9:1) to

afford the product as a yellow solid (4.06 g, 94%, 96% de). Mp = 66-68°C; <sup>31</sup>P NMR (162 MHz, CDCl<sub>3</sub>): δ = 31.9 (s); <sup>1</sup>H NMR (400 MHz, CDCl<sub>3</sub>): δ = 7.59-7.68 (m, 2H), 7.30-7.36 (m, 1H), 7.20-7.28 (m, 2H), 4.11-4.23 (m, 1H), 3.01 (dd, *J* = 8.9 and 12.7 Hz, 1H), 2.88 (dd, *J* = 5.9 and 12.7 Hz, 1H), 2.12-2.24 (m, 1H), 1.58-1.67 (m, 1H), 1.35-1.51 (m, 2H), 1.18-1.28 (m, 1H), 1.03-1.17 (m, 1H), 0.54-0.86 (m, 3H), 0.75 (d, *J* = 7.0 Hz, 3H), 0.69 (d, *J* = 6.9 Hz, 3H), 0.52 (d, *J* = 6.6 Hz, 3H); <sup>13</sup>C NMR (101 MHz, CDCl<sub>3</sub>): δ = 132.5 (d, *J*<sub>PCCC</sub> = 2.7 Hz), 131.8 (d, *J*<sub>PCCC</sub> = 9.8 Hz, 2C), 130.2 (d, *J*<sub>PC</sub> = 136 Hz), 128.3 (d, *J*<sub>PCC</sub> = 13.1 Hz, 2C), 77.9 (d, *J*<sub>POC</sub> = 7.2 Hz), 48.6 (d, *J*<sub>POCC</sub> = 6.2 Hz), 42.9, 33.8, 31.3, 25.5, 22.7, 21.8, 21.0, 15.8, -6.5 (d, *J*<sub>PC</sub> = 102 Hz); HRMS (EI+) *m/z* calcd for C<sub>17</sub>H<sub>27</sub>IO<sub>2</sub>P ([M+H]<sup>+</sup>) 421.0793, found 421.0793; [α]<sub>D</sub> = -29.5°.

**(*R<sub>p</sub>*, *R<sub>p</sub>*)-Ethane-1,2-diylbis(menthyl phenylphosphinate 31):<sup>4</sup>**

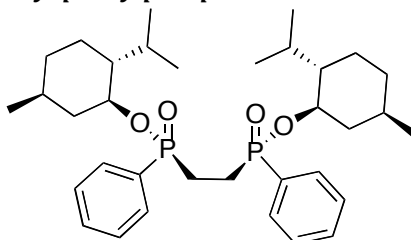

To a solution of (*S<sub>p</sub>*)-30 (420.3 mg, 1 mmol, 1 equiv, 96% de) in THF (8 mL) at -78°C under N<sub>2</sub> was slowly added isopropylmagnesium chloride (0.55 mL, 1.1 mmol, 1.1 equiv, 2.0M in THF). After 1 h of stirring at -78°C, CuCl<sub>2</sub> (403 mg, 3 mmol, 3 equiv) was added. The dry ice-bath was removed and the reaction mixture was stirred for 2 h at rt. A saturated solution of NH<sub>4</sub>Cl was added and the two layers were separated. The aqueous layer was extracted with dichloromethane (3X). The combined organic layers was dried over MgSO<sub>4</sub>, filtered and concentrated under vacuum. The crude obtained was purified by column chromatography (hexane/ethyl acetate 8:2 to 6:4) to afford the product as a white solid (237 mg, 81%, de = 89%). Mp = 78-79°C; <sup>31</sup>P NMR (162 MHz, CDCl<sub>3</sub>): δ = 39.7 (m); <sup>1</sup>H NMR (400 MHz, CDCl<sub>3</sub>): δ = 7.77-7.87 (m, 4H), 7.44-7.59 (m, 6H), 4.23-4.36 (m, 2H), 2.21 (dq, *J* = 2.3 and 7.0 Hz, 2H), 1.78-1.87 (m, 2H), 1.66 (d, *J* = 14.4 Hz, 4H), 1.56-1.72 (m, 4H), 1.25-1.44 (m, 4H), 0.74-1.11 (m, 6H), 0.97 (d, *J* = 7.1 Hz, 6H), 0.90 (d, *J* = 7.0 Hz, 6H), 0.78 (d, *J* = 6.4 Hz, 6H); <sup>13</sup>C NMR (101 MHz, CDCl<sub>3</sub>): δ = 133.8 (d, *J*<sub>PC</sub> = 129 Hz, 2C), 131.8 (d, *J*<sub>PCCC</sub> = 2.7 Hz, 2C), 130.7 (d, *J*<sub>PCCC</sub> = 9.9 Hz, 4C), 128.3 (d, *J*<sub>PCC</sub> = 12.7 Hz, 4C), 76.2 (d, *J*<sub>POC</sub> = 7.2 Hz, 2C), 48.6 (d, *J*<sub>POCC</sub> = 6.1 Hz, 4C), 43.1 (2C), 34.0 (2C), 31.3 (2C), 25.7 (2C), 21.9 (d, *J*<sub>PC</sub> = 138 Hz, 2C), 21.8 (2C), 17.1 (2C), 15.7 (2C); [α]<sub>D</sub><sup>25</sup> = -17.1° (chloroform).

**(*S<sub>p</sub>*)-Menthyl [(diphenylphosphino)methyl]phenylphosphinate 32:**

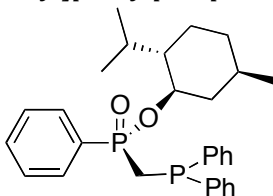

To a solution of (*S<sub>p</sub>*)-30 (676 mg, 2 mmol, 1 equiv, 96% de) in tetrahydrofuran (10 mL) was added at -78°C and under N<sub>2</sub> isopropylmagnesium chloride (1.1 mL, 2.2 mmol, 1.1 equiv, 2.0M solution). After 2 hours at -78°C, chlorodiphenylphosphine (0.37 mL, 2 mmol, 1 equiv) was added. The dry-ice bath was removed and the reaction was allowed to warm up to rt and was stirred for 4 hours at rt. A saturated solution of NH<sub>4</sub>Cl was added and the two layers were separated. The aqueous layer was extracted with dichloromethane (3X). The combined organic layers was dried over MgSO<sub>4</sub>, filtered and concentrated under vacuum. The crude obtained was purified by column chromatography (dichloromethane/acetone 100:0 to 98:2) to afford the product as a white solid (371 g, 39%, 96% de). Mp = 54-55°C; <sup>31</sup>P NMR (162 MHz, CDCl<sub>3</sub>): δ = 32.2 (d, *J* = 9.7 Hz, 46%), 11.9 (s, 54%); <sup>1</sup>H NMR (400 MHz, CDCl<sub>3</sub>): δ = 7.84-7.92 (m, 2H), 7.50-7.59 (m, 4H), 7.39-7.49 (m, 4H), 7.32-7.38 (m, 1H), 7.21-7.31 (m, 4H), 4.09-4.20 (m, 1H), 3.03 (dd, *J* = 2.1 and 11.1 Hz, 1H), 2.99 (d, *J* = 11.1 Hz, 1H), 2.07 (dq, *J* = 2.1 and 7.0 Hz, 1H), 1.51-1.65 (m, 3H), 1.12-1.29 (m, 2H), 0.69-1.50 (m, 3H), 0.94 (q, *J* = 11.0 Hz, 1H), 0.69-0.97 (m, 2H), 0.87 (d, *J* = 7.0 Hz, 3H), 0.80 (d, *J* = 6.9 Hz, 3H), 0.70 (d, *J* = 6.5 Hz, 3H);

$^{13}\text{C}$  NMR (101 MHz,  $\text{CDCl}_3$ ):  $\delta$  = 132.8 (d,  $J_{\text{PCCC}} = 9.9$  Hz, 2C), 132.7 (d,  $J_{\text{PCCC}} = 9.6$  Hz, 2C), 132.2 (d,  $J_{\text{PC}} = 134$  Hz), 132.1 (d,  $J_{\text{PCCC}} = 2.8$  Hz), 131.5 (d,  $J_{\text{PCCC}} = 10.5$  Hz, 2C), 131.4 (d,  $J_{\text{PCCC}} = 2.3$  Hz), 131.2 (d,  $J_{\text{PCCC}} = 2.4$  Hz), 128.7 (d,  $J_{\text{PCC}} = 10.7$  Hz, 2C), 128.5 (d,  $J_{\text{PC}} = 134$  Hz), 128.5 (d,  $J_{\text{PC}} = 135$  Hz), 128.4 (d,  $J_{\text{PCC}} = 10.3$  Hz, 2C), 128.2 (d,  $J_{\text{PCC}} = 13.3$  Hz, 2C), 77.7 (d,  $J_{\text{POC}} = 7.4$  Hz), 48.5 (d,  $J_{\text{POCC}} = 5.3$  Hz), 42.9, 33.9, 31.4, 28.8 (dd,  $J_{\text{PC}} = 92.6$  Hz), 25.5, 22.7, 21.9, 21.2, 15.6; HRMS (EI+)  $m/z$  calcd for  $\text{C}_{29}\text{H}_{36}\text{O}_2\text{P}_2$  ( $[\text{M}]^+$ ) 478.2191, found 478.2190;  $[\alpha]_{\text{D}}^{24} = -0.9^\circ$  (chloroform).

***(R<sub>p</sub>)-Menthyl (hydroxymethyl) (3-phenylpropyl)phosphinate 33:***

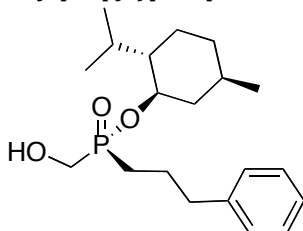

To a suspension of Pd/C (191 mg, 0.18 mmol, 10 mol%) in ethanol (2 mL) flushed with  $\text{N}_2$  was added a solution of *(R<sub>p</sub>)-4* (630 g, 1.8 mmol, 1 equiv, >99% de) in ethanol (8 mL). The tube was placed in a hydrogenator and stirred for 20 hours at 50 psi of  $\text{H}_2$ . The suspension was then filtered through celite and the solid was washed with ethanol three times. The filtrate was concentrated under vacuum to afford the product as a white solid (633 g, 100%, 98% de).  $^{31}\text{P}$  NMR (162 MHz,  $\text{CDCl}_3$ ):  $\delta$  = 52.5 (septuplet,  $J = 6.5$  Hz);  $^1\text{H}$  NMR (400 MHz,  $\text{CDCl}_3$ ):  $\delta$  = 7.24-7.31 (m, 2H), 7.13-7.21 (m, 3H), 4.12-4.22 (m, 1H), 3.83 (dd,  $J = 6.1$  and 14.5 Hz, 1H), 3.75 (dd,  $J = 1.9$  and 14.5 Hz, 1H), 2.69 (t,  $J = 7.4$  Hz, 2H), 2.01-2.12 (m, 2H), 1.88-1.99 (m, 2H), 1.74-1.84 (m, 2H), 1.61-1.69 (m, 2H), 1.37-1.51 (m, 1H), 1.25-1.34 (m, 1H), 1.16 (q,  $J = 11.3$  Hz, 1H), 0.98 (dq,  $J = 2.5$  and 12.8 Hz, 1H), 0.90 (d,  $J = 6.4$  Hz, 3H), 0.90 (d,  $J = 7.2$  Hz, 3H), 0.69-0.90 (m, 1H), 0.77 (d,  $J = 7.0$  Hz, 3H);  $^{13}\text{C}$  NMR (101 MHz,  $\text{CDCl}_3$ ):  $\delta$  = 141.0, 128.5 (2C), 128.4 (2C), 126.1, 76.3 (d,  $J_{\text{POC}} = 7.7$  Hz), 59.8 (d,  $J_{\text{PC}} = 105$  Hz), 48.6 (d,  $J_{\text{POCC}} = 5.6$  Hz), 43.6, 36.8 (d,  $J_{\text{PCC}} = 15.7$  Hz), 34.0, 31.5, 25.9 (d,  $J_{\text{PC}} = 90.2$  Hz), 25.6, 23.3 (d,  $J_{\text{PCCC}} = 3.5$  Hz), 22.7, 22.0, 21.0, 15.6.

***(S<sub>p</sub>)-Menthyl (3-phenylpropyl)-H-phosphinate 19:***

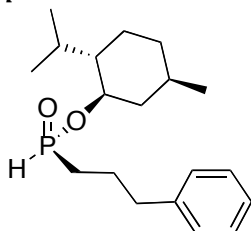

To a solution of *N*-chlorosuccinimide (721 mg, 5.4 mmol, 3 equiv) in dichloromethane (30 mL) at  $-78^\circ\text{C}$  and under  $\text{N}_2$  was added dropwise a solution of dimethyl sulfide (0.4 mL, 5.4 mmol, 3 equiv) in dichloromethane (5 mL). After 10 minutes at  $-78^\circ\text{C}$ , a solution of *(R<sub>p</sub>)-33* (630 mg, 1.8 mmol, 1 equiv, 98% de) in dichloromethane (5 mL) was added over 20 minutes. After 1h at  $-78^\circ\text{C}$ , triethylamine (1.25 mL, 9 mmol, 5 equiv) was added over 15 minutes and the reaction was allowed to warm up to rt. After 1h at rt, water was added and the two layers were separated. The aqueous layer was extracted with dichloromethane (X2). The combined organic layer was dried over  $\text{MgSO}_4$ , filtered and concentrated under vacuum. The crude obtained was purified by column chromatography (dichloromethane/acetone 99:1 to 97:3) to afford the product as a colorless oil (554 mg, 96%, 96% de).  $^{31}\text{P}$  NMR (162 MHz,  $\text{CDCl}_3$ ):  $\delta$  = 33.3 (dsxtuplet,  $J = 12.7$  and 528 Hz);  $^1\text{H}$  NMR (400 MHz,  $\text{CDCl}_3$ ):  $\delta$  = 7.16-7.23 (m, 2H), 7.05-7.13 (m, 3H), 7.08 (d,  $J = 528$  Hz, 1H), 4.07-4.19 (m, 1H), 2.62 (t,  $J = 7.4$  Hz, 2H), 1.99-2.10 (m, 2H), 1.77-1.91 (m, 2H), 1.53-1.73 (m, 4H), 1.21-1.43 (m, 2H), 1.02 (q,  $J = 11.6$  Hz, 1H), 0.94 (dq,  $J = 3.0$  and 12.4 Hz, 1H), 0.84 (d,  $J = 6.8$  Hz, 6H), 0.69-0.85 (m, 1H), 0.74 (d,  $J = 6.9$  Hz, 3H);  $^{13}\text{C}$  NMR (101 MHz,  $\text{CDCl}_3$ ):  $\delta$  = 140.7, 128.4 (2C), 128.4 (2C), 126.1, 76.7 (d,  $J_{\text{POC}} = 7.4$  Hz), 48.3 (d,  $J_{\text{POCC}} = 5.9$  Hz), 41.6, 36.2 (d,  $J_{\text{PCC}} = 16.0$  Hz), 33.9, 31.3, 28.1 (d,  $J_{\text{PC}} = 95.0$  Hz), 25.6, 22.9, 22.4 (d,  $J_{\text{PCCC}} = 2.5$  Hz), 21.9, 20.8, 15.7;  $[\alpha]_{\text{D}}^{23} = -27.3^\circ$  (chloroform).

**(*R<sub>p</sub>*)-1-Menthyloxy-1,2,3,4-tetrahydro-1-phosphinoline-1-oxide 34:**

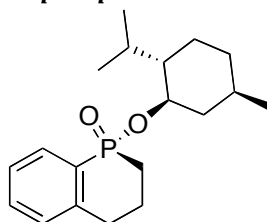

To a suspension of  $\text{Mn}(\text{OAc})_2$  (8.7 mg, 0.05 mmol, 5 mol%),  $\text{MnO}_2$  (261 mg, 3 mmol, 3 equiv.) and sodium acetate (246 mg, 3 mmol, 3 equiv.) in acetic acid (2.5 mL) at 70°C under  $\text{N}_2$  was added a solution of (*S<sub>p</sub>*)-19 (322 mg, 1 mmol, 1 equiv, 96% de) in acetic acid (2.5 mL) over 2 h *via* a syringe pump. The reaction mixture was then stirred for an additional 2h at 70°C under  $\text{N}_2$ . Ethyl acetate (~30 mL) and an aqueous solution of  $\text{Na}_2\text{S}_2\text{O}_4$  0.2M saturated with  $\text{NaHCO}_3$  (~40 mL) were added. The suspension was stirred vigorously for 5 minutes, filtered through celite and the two layers were separated. The organic layer was washed with an aqueous solution of  $\text{Na}_2\text{S}_2\text{O}_4$  0.2M saturated with  $\text{NaHCO}_3$  (~40 mL), a saturated aqueous solution of  $\text{NaHCO}_3$  (~40 mL) and brine (~40 mL), dried over  $\text{MgSO}_4$ , filtered and concentrated under vacuum. The crude obtained was purified by column chromatography (dichloromethane/acetone 100:0 to 95:5) to afford the product as a colorless oil (300 mg, 94%, 96% de).  $^{31}\text{P}$  NMR (162 MHz,  $\text{CDCl}_3$ ):  $\delta$  = 36.3 (s);  $^1\text{H}$  NMR (400 MHz,  $\text{CDCl}_3$ ):  $\delta$  = 7.71-7.79 (m, 1H), 7.28-7.34 (m, 1H), 7.20-7.27 (m, 1H), 7.05-7.12 (m, 1H), 4.17-4.28 (m, 1H), 2.33-2.47 (m, 2H), 1.54-1.79 (m, 6H), 1.53-1.62 (m, 2H), 1.29-1.42 (m, 1H), 1.18-1.28 (m, 1H), 1.02 (q,  $J$  = 10.9 Hz, 1H), 0.94 (dq,  $J$  = 2.6 and 12.5 Hz, 1H), 0.83 (d,  $J$  = 7.0 Hz, 3H), 0.79 (d,  $J$  = 6.9 Hz, 3H), 0.79 (d,  $J$  = 6.6 Hz, 3H), 0.75 (dq,  $J$  = 3.2 and 12.8 Hz, 1H);  $^{13}\text{C}$  NMR (101 MHz,  $\text{CDCl}_3$ ):  $\delta$  = 143.7 (d,  $J_{\text{PCC}}$  = 9.9 Hz), 131.6 (d,  $J_{\text{PCCC}}$  = 2.4 Hz), 129.8 (d,  $J_{\text{PCCC}}$  = 5.1 Hz), 129.8 (d,  $J_{\text{PC}}$  = 123 Hz), 128.9 (d,  $J_{\text{PCC}}$  = 11.5 Hz), 126.5 (d,  $J_{\text{PCCC}}$  = 11.5 Hz), 76.4 (d,  $J_{\text{POC}}$  = 7.2 Hz), 48.6 (d,  $J_{\text{POCC}}$  = 5.9 Hz), 43.6, 34.0, 31.5, 31.3 (d,  $J_{\text{PCC}}$  = 8.5 Hz), 26.5 (d,  $J_{\text{PC}}$  = 92.8 Hz), 25.6, 22.7, 22.0, 21.2 (d,  $J_{\text{PCCC}}$  = 5.1 Hz), 21.1, 15.6; HRMS (EI+)  $m/z$  calcd for  $\text{C}_{19}\text{H}_{29}\text{O}_2\text{P}$  ( $[\text{M}]^+$ ) 320.1905, found 320.1907;  $[\alpha]_{\text{D}}^{22}$  = -8.6° (chloroform).

**(*S<sub>p</sub>*)-1-menthyl-2,3-diphenyl-1-phosphindole 35:5**

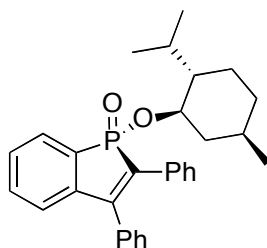

To a suspension of  $\text{Mn}(\text{OAc})_2$  (8.7 mg, 0.05 mmol, 5 mol%),  $\text{MnO}_2$  (261 mg, 3 mmol, 3 equiv.), sodium acetate (246 mg, 3 mmol, 3 equiv.) and diphenylacetylene (178 mg, 1 mmol, 1 equiv.) in acetic acid (2.5 mL) at 70°C under  $\text{N}_2$  was added a solution of (*R<sub>p</sub>*)-1 (280 mg, 1 mmol, 1 equiv, >99% de) in acetic acid (2.5 mL) over 2 h *via* a syringe pump. The reaction mixture was then stirred for an additional 2h at 70°C under  $\text{N}_2$ . Ethyl acetate (~30 mL) and an aqueous solution of  $\text{Na}_2\text{S}_2\text{O}_4$  0.2M saturated with  $\text{NaHCO}_3$  (~40 mL) were added. The suspension was stirred vigorously for 5 minutes, filtered through celite and the two layers were separated. The organic layer was washed with an aqueous solution of  $\text{Na}_2\text{S}_2\text{O}_4$  0.2M saturated with  $\text{NaHCO}_3$  (~40 mL), a saturated aqueous solution of  $\text{NaHCO}_3$  (~40 mL) and brine (~40 mL), dried over  $\text{MgSO}_4$ , filtered and concentrated under vacuum. The crude obtained was purified by column chromatography (dichloromethane/acetone 100:0 to 98:2) to afford the product as a white solid (130 mg, 29%, >99% de). Mp = 159-160°C;  $^{31}\text{P}$  NMR (162 MHz,  $\text{CDCl}_3$ ):  $\delta$  = 44.8 (s);  $^1\text{H}$  NMR (400 MHz,  $\text{CDCl}_3$ ):  $\delta$  = 7.69-7.79 (m, 1H), 7.05-7.56 (m, 13H), 4.29-4.42 (m, 1H), 2.25-2.38 (s, 1H), 1.53-1.76 (m, 3H), 1.38-1.51 (m, 1H), 1.16-1.36 (m, 2H), 0.75-1.10 (m, 2H), 0.92 (d,  $J$  = 6.4 Hz, 3H), 0.66 (d,  $J$  = 7.0 Hz, 3H), 0.43 (d,  $J$  = 6.8 Hz, 3H); HRMS (EI+)  $m/z$  calcd for  $\text{C}_{30}\text{H}_{33}\text{O}_2\text{P}$  ( $[\text{M}]^+$ ) 456.2218, found 456.2212;  $[\alpha]_{\text{D}}^{25}$  = -52.9° (chloroform).

**(*R<sub>p</sub>*)-Menthyl (acetoxymethyl)cyclohexylphosphinate 36:**



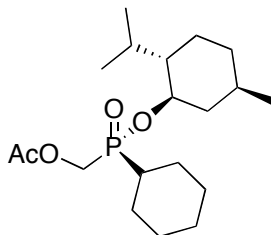

To a solution of (*R<sub>p</sub>*)-7 (2.76 g, 10 mmol, 1 equiv, 96% de) in acetonitrile (40 mL) in a sealed tube was added cyclohexene (2.03 mL, 20 mmol, 2 equiv) and AIBN (82 mg, 0.5 mmol, 5 mol%) and the reaction was stirred at reflux under N<sub>2</sub> for 2 hours. After cooling down the reaction to rt, AIBN (82 mg, 0.5 mmol, 5 mol%) was added and the reaction was stirred at reflux under N<sub>2</sub> for 2 hours. 2 additional addition of AIBN was made every 2 hours. 2 hours after the last addition, the reaction was cooled down to rt (81% NMR).

**(*S<sub>p</sub>*)-Menthyl (acetoxymethyl)(1-hydroxycyclohexyl)phosphinate 37:**

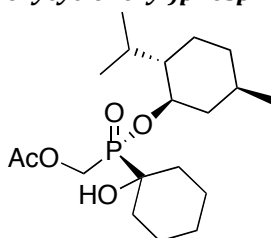

To a solution of (*S<sub>p</sub>*)/(*R<sub>p</sub>*)-7 (13.8 g, 50 mmol, 1 equiv, dr 54:46) in toluene (75 mL) was added at rt and under N<sub>2</sub> pyridine (0.4 mL, 5 mmol, 0.1 equiv) and cyclohexanone (10.3 mL, 100 mmol, 2 equiv). The reaction mixture was stirred for 3 days at reflux. After cooling down to rt, the solvent was removed under vacuum and the residue obtained was purified by column chromatography (dichloromethane/acetone 98:2 to 90:10) to afford the (*R<sub>p</sub>*)/(*S<sub>p</sub>*) mixture product as a white solid (15 g, 80%, 54:46 dr). This solid was recrystallized at -18°C in diethyl ether to afford the product as a white solid (5.1 g, 27%, 92% de). Mp = 125-126°C; <sup>31</sup>P NMR (162 MHz, CDCl<sub>3</sub>): δ = 42.6 (s); <sup>1</sup>H NMR (400 MHz, CDCl<sub>3</sub>): δ = 4.46-4.55 (m, 2H), 4.25-4.35 (m, 1H), 3.22 (s, 1H), 2.19 (dq, *J* = 2.7 and 7.0 Hz, 1H), 2.10-2.16 (m, 1H), 2.12 (s, 3H), 1.91-1.98 (m, 1H), 1.77-1.85 (m, 1H), 1.64-1.74 (m, 7H), 1.54-1.63 (m, 3H), 1.41-1.52 (m, 1H), 1.31-1.40 (m, 1H), 1.16-1.29 (m, 1H), 1.14 (q, *J* = 11.2 Hz, 1H), 1.01 (dq, *J* = 3.5 and 12.4 Hz, 1H), 0.92 (d, *J* = 7.0 Hz, 3H), 0.92 (d, *J* = 6.5 Hz, 3H), 0.78-0.92 (m, 1H), 0.81 (d, *J* = 6.9 Hz, 3H); <sup>13</sup>C NMR (101 MHz, CDCl<sub>3</sub>): δ = 170.2 (d, *J*<sub>PCOC</sub> = 7.5 Hz), 77.5 (d, *J*<sub>POC</sub> = 8.9 Hz), 72.3 (d, *J*<sub>PC</sub> = 116 Hz), 57.2 (d, *J*<sub>PC</sub> = 97.9 Hz), 48.8 (d, *J*<sub>POCC</sub> = 5.3 Hz), 43.2, 34.0, 31.6, 30.8 (d, *J*<sub>PCCC</sub> = 3.5 Hz), 30.2 (d, *J*<sub>PCCC</sub> = 3.7 Hz), 25.4, 22.6, 22.0, 21.2, 20.7, 20.0 (d, *J*<sub>PCC</sub> = 9.9 Hz), 19.9 (d, *J*<sub>PCC</sub> = 10.1 Hz), 15.4; [α]<sub>D</sub><sup>24</sup> = -22.4° (chloroform).

**(*R<sub>p</sub>*)-Menthyl (acetoxymethyl)(cyclohex-1-ene)phosphinate 38:**

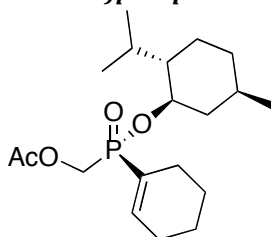

To a solution of (*S<sub>p</sub>*)-37 (374 mg, 1 mmol, 1 equiv, 92% de) in benzene (5 mL) was added at rt under N<sub>2</sub> thionyl chloride (0.087 mL, 1.2 mmol, 1.2 equiv.) followed by triethylamine (0.17 mL, 1.2 mmol, 1.2 equiv.). The mixture was then stirred for 16 h at reflux under N<sub>2</sub>. After cooling down the reaction to rt, the solvent was removed under vacuum. The residue obtained was solubilized in ethyl acetate and the organic layer was washed with a saturated aqueous solution of NaHCO<sub>3</sub> and brine, dried over MgSO<sub>4</sub>, filtered and concentrated under vacuum. The crude obtained was purified by column

chromatography (dichloromethane/acetone 99:1 to 95:5) to afford the product as a colorless oil (307 mg, 86%, 92% de).  $^{31}\text{P}$  NMR (162 MHz,  $\text{CDCl}_3$ ):  $\delta = 32.8$  (s);  $^1\text{H}$  NMR (400 MHz,  $\text{CDCl}_3$ ):  $\delta = 6.71$  (d,  $J = 20.4$  Hz, 1H), 4.03-4.31 (m, 3H), 1.98-2.16 (m, 5H), 1.99 (s, 3H), 1.92 (dq,  $J = 2.5$  and 7.0 Hz, 1H), 1.46-1.61 (m, 6H), 1.27-1.40 (m, 1H), 1.17-1.26 (m, 1H), 1.06 (q,  $J = 11.4$  Hz, 1H), 0.88 (dq,  $J = 2.4$  and 10.6 Hz, 1H), 0.79 (d,  $J = 6.4$  Hz, 3H), 0.79 (d,  $J = 7.0$  Hz, 3H), 0.67-0.79 (m, 1H), 0.64 (d,  $J = 6.9$  Hz, 3H);  $^{13}\text{C}$  NMR (101 MHz,  $\text{CDCl}_3$ ):  $\delta = 170.0$  (d,  $J_{\text{POC}} = 8.1$  Hz), 144.3 (d,  $J_{\text{PCC}} = 7.9$  Hz), 129.0 (d,  $J_{\text{PC}} = 127$  Hz), 76.7 (d,  $J_{\text{POC}} = 7.3$  Hz), 59.4 (d,  $J_{\text{PC}} = 115$  Hz), 48.5 (d,  $J_{\text{POCC}} = 5.8$  Hz), 43.5, 33.9, 31.5, 26.0 (d,  $J_{\text{PCC}} = 15.4$  Hz), 25.5, 24.1 (d,  $J_{\text{PCCC}} = 9.8$  Hz), 22.7, 21.9 (d,  $J_{\text{PCCC}} = 8.9$  Hz), 21.9, 21.2, 21.0, 20.4, 15.6; HRMS (EI+)  $m/z$  calcd for  $\text{C}_{19}\text{H}_{33}\text{O}_4\text{P}$  ( $[\text{M}]^+$ ) 356.2116, found 356.2114;  $[\alpha]_{\text{D}}^{23} = -28.7^\circ$  (chloroform).

***(R<sub>p</sub>)-Menthyl (hydroxymethyl)cyclohexylphosphinate 39:***

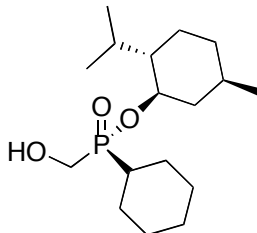

To a solution of *(R<sub>p</sub>)-38* (356 mg, 1 mmol, 1 equiv, 92% de) in methanol (5 mL) was added potassium carbonate (14 mg, 0.1 mmol, 0.1 equiv.) and the mixture was stirred for 20 h at rt. The solvent was removed under vacuum and the crude obtained was purified by column chromatography (dichloromethane/acetone 95:5 to 85:15) to afford the product as a white solid (135 mg, 43%, 80% de). Mp = 80-81°C;  $^{31}\text{P}$  NMR (162 MHz,  $\text{CDCl}_3$ ):  $\delta = 38.7$  (s);  $^1\text{H}$  NMR (400 MHz,  $\text{CDCl}_3$ ):  $\delta = 6.74$  (d,  $J = 20.4$  Hz, 1H), 5.16 (s, 1H), 4.03-4.13 (m, 1H), 3.76-3.89 (m, 2H), 2.07-2.22 (m, 5H), 1.99 (dq,  $J = 2.5$  and 7.0 Hz, 1H), 1.52-1.71 (m, 6H), 1.32-1.46 (m, 1H), 1.19-1.30 (m, 1H), 1.10 (q,  $J = 11.2$  Hz, 1H), 0.92 (dq,  $J = 2.5$  and 12.8 Hz, 1H), 0.86 (d,  $J = 6.1$  Hz, 3H), 0.84 (d,  $J = 6.6$  Hz, 3H), 0.73-0.90 (m, 1H), 0.69 (d,  $J = 6.9$  Hz, 3H);  $^{13}\text{C}$  NMR (101 MHz,  $\text{CDCl}_3$ ):  $\delta = 143.6$  (d,  $J_{\text{PCC}} = 7.4$  Hz), 129.0 (d,  $J_{\text{PC}} = 119$  Hz), 76.4 (d,  $J_{\text{POC}} = 7.7$  Hz), 58.8 (d,  $J_{\text{PC}} = 112$  Hz), 48.6 (d,  $J_{\text{POCC}} = 5.5$  Hz), 43.7, 34.0, 31.5, 26.1 (d,  $J_{\text{PCC}} = 14.7$  Hz), 25.5, 24.2 (d,  $J_{\text{PCCC}} = 9.7$  Hz), 22.7, 22.0, 22.0 (d,  $J_{\text{PCCC}} = 10.4$  Hz), 21.1, 21.0, 15.7; HRMS (EI+)  $m/z$  calcd for  $\text{C}_{17}\text{H}_{31}\text{O}_3\text{P}$  ( $[\text{M}]^+$ ) 314.2011, found 314.2007;  $[\alpha]_{\text{D}}^{24} = -29.9^\circ$  (chloroform).

To a suspension of Pd/C (34 mg, 0.032 mmol, 10 mol%) in ethanol (1 mL) flushed with  $\text{N}_2$  was added a solution of *(R<sub>p</sub>)-menthyl (hydroxymethyl)(cyclohex-1-ene)phosphinate* (100 mg, 0.32 mmol, 1 equiv, 80% de) in ethanol (4 mL). The tube was placed in a hydrogenator and stirred for 20 hours at 50 psi of  $\text{H}_2$ . The suspension was then filtered through celite and the solid was washed with ethanol three times. The filtrate was concentrated under vacuum to afford the product as a white solid (102 mg, 100%, 80% de). Mp = 134-135°C;  $^{31}\text{P}$  NMR (162 MHz,  $\text{CDCl}_3$ ):  $\delta = 51.8$  (s, 90%);  $^1\text{H}$  NMR (400 MHz,  $\text{CDCl}_3$ ):  $\delta = 5.06$  (s, 1H), 4.10-4.23 (m, 1H), 3.76-3.89 (m, 2H), 2.04-2.22 (m, 2H), 1.74-2.03 (m, 5H), 1.69-1.71 (m, 3H), 1.16-1.48 (m, 7H), 1.07 (q,  $J = 11.4$  Hz, 1H), 0.97 (dq,  $J = 2.5$  and 12.8 Hz, 1H), 0.89 (d,  $J = 7.0$  Hz, 3H), 0.88 (d,  $J = 6.4$  Hz, 3H), 0.74-0.87 (m, 1H), 0.79 (d,  $J = 6.9$  Hz, 3H);  $^{13}\text{C}$  NMR (101 MHz,  $\text{CDCl}_3$ ):  $\delta = 76.0$  (d,  $J_{\text{POC}} = 8.0$  Hz), 58.2 (d,  $J_{\text{PC}} = 99.1$  Hz), 48.8 (d,  $J_{\text{POCC}} = 5.2$  Hz), 43.5, 36.1 (d,  $J_{\text{PC}} = 92.3$  Hz), 34.1, 31.5, 26.3 (d,  $J_{\text{PCC}} = 14.1$  Hz), 26.3 (d,  $J_{\text{PCC}} = 13.9$  Hz), 25.9, 25.4, 25.3 (d,  $J_{\text{PCCC}} = 3.3$  Hz), 24.8 (d,  $J_{\text{PCCC}} = 2.9$  Hz), 22.6, 22.1, 21.1, 15.5; HRMS (EI+)  $m/z$  calcd for  $\text{C}_{17}\text{H}_{33}\text{O}_3\text{P}$  ( $[\text{M}]^+$ ) 316.2167, found 316.2162;  $[\alpha]_{\text{D}}^{23} = -32.1^\circ$  (chloroform).

***(R<sub>p</sub>)-Menthyl (hydroxymethyl)cyclohexylphosphinate 39:***

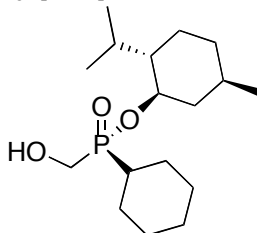

To a solution of (*S<sub>p</sub>*)/(*R<sub>p</sub>*)-7 (13.8 g, 50 mmol, 1 equiv, 54:46 dr) in toluene (75 mL) was added at rt and under N<sub>2</sub> pyridine (0.4 mL, 5 mmol, 0.1 equiv) and cyclohexanone (10.3 mL, 100 mmol, 2 equiv). The reaction mixture was stirred for 3 days at reflux. After cooling down to rt, the solvent was removed under vacuum and the residue obtained was purified by column chromatography (dichloromethane/acetone 98:2 to 90:10) to afford the (*R<sub>p</sub>*)/(*S<sub>p</sub>*) mixture as a white solid (15 g, 80%). <sup>31</sup>P NMR (162 MHz, CDCl<sub>3</sub>): δ = 43.9 (s, 46%), 42.8 (s, 54%).

To a solution of (*S<sub>p</sub>*)/(*R<sub>p</sub>*)-37 (10.5 g, 28 mmol, 1 equiv, 54:46 dr) in benzene (80 mL) was added at rt under N<sub>2</sub> thionyl chloride (2.3 mL, 31 mmol, 1.1 equiv.) followed by triethylamine (4.3 mL, 31 mmol, 1.1 equiv.). The mixture was then stirred for 16 h at reflux under N<sub>2</sub>. After cooling down the reaction, the solvent was removed under vacuum. The residue obtained was solubilized in ethyl acetate and the organic layer was washed with a saturated aqueous solution of NaHCO<sub>3</sub> and brine, dried over MgSO<sub>4</sub>, filtered and concentrated under vacuum. The crude obtained was purified by column chromatography (dichloromethane/acetone 99:1 to 95:5) to afford the product as a colorless oil (8.57 g, 86%). <sup>31</sup>P NMR (162 MHz, CDCl<sub>3</sub>): δ = 37.9 (s, 42%), 37.2 (s, 58%).

To a solution of the crude obtained (8.5 g, 24 mmol, 1 equiv, 52:48 dr) in methanol (50 mL) was added potassium carbonate (331 mg, 2.4 mmol, 0.1 equiv.) and the mixture was stirred for 20 h at rt. The solvent was removed under vacuum and the crude obtained was purified by column chromatography (dichloromethane/acetone 80:20) to afford the product as a white solid (6.58 g, 87%). <sup>31</sup>P NMR (162 MHz, CDCl<sub>3</sub>): δ = 39.2 (s, 44%), 38.5 (s, 56%).

To a suspension of Pd/C (2.2 g, 2.07 mmol, 10 mol%) in ethanol (25 mL) flushed with N<sub>2</sub> was added a solution of the crude obtained (6.5 g, 20.7 mmol, 1 equiv) in ethanol (50 mL). The flask was placed in a hydrogenator and stirred for 4 days at 50 psi of H<sub>2</sub>. The suspension was then filtered through celite and the solid was washed with ethanol three times. The filtrate was concentrated under vacuum to afford the product as a white solid (6.54 g, 100%). This solid was crystallized in ethyl acetate (200 mL) at rt to afford the product as a white solid (1.55 g, 24%, > 99% de, 14% overall yield). <sup>31</sup>P NMR (162 MHz, CDCl<sub>3</sub>): δ = 47.3 (s); <sup>1</sup>H NMR (400 MHz, CDCl<sub>3</sub>): δ = 4.76-4.83 (m, 1H), 4.11-4.22 (m, 1H), 3.78-3.90 (m, 2H), 2.18-2.25 (m, 1H), 1.89-2.06 (m, 3H), 1.76-1.88 (m, 3H), 1.60-1.73 (m, 3H), 1.18-1.51 (m, 7H), 1.11 (q, *J* = 11.0 Hz, 1H), 0.98 (dq, *J* = 2.5 and 12.9 Hz, 1H), 0.90 (d, *J* = 7.0 Hz, 3H), 0.90 (d, *J* = 6.4 Hz, 3H), 0.77-0.90 (m, 1H), 0.79 (d, *J* = 6.9 Hz, 3H); <sup>13</sup>C NMR (101 MHz, CDCl<sub>3</sub>): δ = 76.5 (d, *J*<sub>POC</sub> = 8.0 Hz), 57.5 (d, *J*<sub>PC</sub> = 100 Hz), 48.7 (d, *J*<sub>POCC</sub> = 5.9 Hz), 44.0, 36.3 (d, *J*<sub>PC</sub> = 91.2 Hz), 34.1, 31.5, 26.2 (d, *J*<sub>PCC</sub> = 13.6 Hz), 26.2 (d, *J*<sub>PCC</sub> = 14.7 Hz), 25.9, 25.5, 25.3 (d, *J*<sub>PCCC</sub> = 3.2 Hz), 24.7 (d, *J*<sub>PCCC</sub> = 3.1 Hz), 22.7, 22.0, 21.2, 15.6; HRMS (EI+) *m/z* calcd for C<sub>17</sub>H<sub>33</sub>O<sub>3</sub>P ([M]<sup>+</sup>) 316.2167, found 316.2162; [α]<sub>D</sub><sup>23</sup> = -32.1° (chloroform).

**(*R<sub>p</sub>*)-Menthyl (hydroxymethyl)cyclohexylphosphinate 39:**

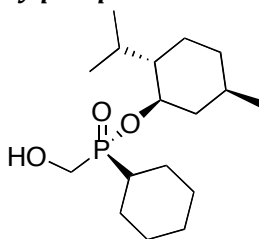

To a solution of (*R<sub>p</sub>*)/(*S<sub>p</sub>*)-7 (8.28 g, 30 mmol, 1 equiv, 54:46 dr) in DMSO (150 mL) was added Mn(OAc)<sub>2</sub> (368 mg, 1.5 mmol, 5 mol%) and cyclohexene (15.2 mL, 150 mmol, 5 equiv.) and the reaction was stirred at 100°C under N<sub>2</sub> for 16 hours. After cooling down the reaction to rt, ethyl acetate (~ 150 mL) and an aqueous solution of Na<sub>2</sub>S<sub>2</sub>O<sub>4</sub> 0.2M saturated with NaHCO<sub>3</sub> (~150 mL) were added and the suspension was stirred vigorously for 5 minutes. The 2 layers were separated and the organic layer was washed with an aqueous solution of Na<sub>2</sub>S<sub>2</sub>O<sub>4</sub> 0.2M saturated with NaHCO<sub>3</sub> (~150 mL), a saturated aqueous solution of NaHCO<sub>3</sub> (~ 150 mL) and brine (~ 150 mL), dried over MgSO<sub>4</sub>, filtered and concentrated under vacuum. The crude obtained was purified by column chromatography (dichloromethane/acetone 100:0 to 94:6) to afford the product as a colorless oil (5.37 g, 50%).

To a solution of the crude obtained (5.37 g, 15 mmol, 1 equiv, 54:46 dr) in methanol (50 mL) was added potassium carbonate (207 mg, 1.5 mmol, 0.1 equiv.) and the mixture was stirred for 20 h at rt.

The solvent was removed under vacuum and the crude obtained was purified by column chromatography (dichloromethane/acetone 95:5 to 60:40) to afford the product as a white solid (4.31 g, 91%). This solid was crystallized in acetonitrile at rt to afford the product as a white solid (1.47g, 31%, > 99% de). Mp = 143-144 °C; <sup>31</sup>P NMR (162 MHz, CDCl<sub>3</sub>): δ = 52.3 (s); <sup>1</sup>H NMR (400 MHz, CDCl<sub>3</sub>): δ = 4.35-4.42 (m, 1H), 4.13-4.24 (m, 1H), 3.80-3.91 (m, 2H), 2.19-2.27 (m, 1H), 1.90-2.07 (m, 3H), 1.78-1.88 (m, 3H), 1.62-1.74 (m, 3H), 1.20-1.51 (m, 7H), 1.13 (q, *J* = 11.0 Hz, 1H), 0.99 (dq, *J* = 2.8 and 12.7 Hz, 1H), 0.78-0.95 (m, 1H), 0.92 (d, *J* = 7.1 Hz, 3H), 0.91(d, *J* = 6.4 Hz, 3H), 0.80 (d, *J* = 6.9 Hz, 3H); <sup>13</sup>C NMR (101 MHz, CDCl<sub>3</sub>): δ = 76.6 (d, *J*<sub>POC</sub> = 8.0 Hz), 57.6 (d, *J*<sub>PC</sub> = 99.3 Hz), 48.7 (d, *J*<sub>POCC</sub> = 5.9 Hz), 44.0, 36.4 (d, *J*<sub>PC</sub> = 91.5 Hz), 34.1, 31.5, 26.3 (d, *J*<sub>PCC</sub> = 13.7 Hz, 2C), 25.9, 25.5, 25.3 (d, *J*<sub>PCCC</sub> = 3.3 Hz), 24.8 (d, *J*<sub>PCCC</sub> = 3.0 Hz), 22.8, 22.0, 21.2, 15.6; HRMS (EI+) *m/z* calcd for C<sub>17</sub>H<sub>33</sub>O<sub>3</sub>P ([M]<sup>+</sup>) 316.2167, found 316.2162; [α]<sub>D</sub><sup>23</sup> = -32.1° (chloroform).

***(R<sub>p</sub>)/(S<sub>p</sub>) Menthyl acetoxymethyl(1,1-diethoxyethyl)phosphinate 40:***

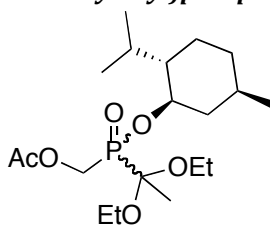

*(R<sub>p</sub>)/(S<sub>p</sub>)-7* (4.95 g, 17.9 mmol, 1 equiv, 51:49 dr), triethyl orthoformate (19.7 mL, 107.5 mmol, 6 equiv) and boron trifluoride diethyl etherate (0.45 mL, 3.6 mmol, 0.2 equiv.) were introduced in a flask and the reaction mixture was stirred at rt under N<sub>2</sub> for 24 hours. Ethyl acetate (~ 150 mL) and an aqueous solution of NaHCO<sub>3</sub> (~150 mL) were added and the 2 layers were separated. The organic layer was washed with brine (~ 150 mL), dried over MgSO<sub>4</sub>, filtered and concentrated under vacuum. The crude obtained was purified by column chromatography (hexane/ethyl acetate 90:10 to 70:30) to afford the product as a colorless oil (5.17 g, 74%). <sup>31</sup>P NMR (162 MHz, CDCl<sub>3</sub>): δ = 35.9 (s, 52%) and 35.1 (s, 48%).

***(R<sub>p</sub>)/(S<sub>p</sub>) Menthyl hydroxymethyl(1,1-diethoxyethyl)phosphinate 41:***

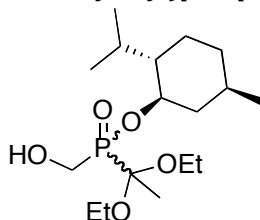

To a solution of *40* (6.6 g, 17 mmol, 1 equiv) in methanol (30 mL) was added potassium carbonate (235 mg, 1.7 mmol, 0.1 equiv.) and the mixture was stirred for 20 h at rt. The solvent was removed under vacuum to afford the product as a colorless oil (5.95 g, 100%). <sup>31</sup>P NMR (162 MHz, CDCl<sub>3</sub>): δ = 42.0 (s, 53%) and 41.7 (s, 47%).

***(R<sub>p</sub>)/(S<sub>p</sub>) Menthyl (1,1-diethoxyethyl)-H-phosphinate 43:***

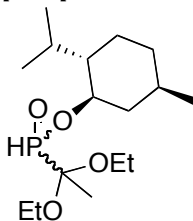

To a solution of concentrated H<sub>3</sub>PO<sub>2</sub> (3.3 g, 50 mmol, 1 equiv) was added slowly, at room temperature under nitrogen, trifluoroacetic acid (1.14 mL, 10 mmol, 0.2 equiv) followed by triethyl orthoformate (20 mL, 110 mmol, 2.2 equiv.). After 4 hours of stirring at room temperature, chloroform was added (100 mL) as well as a saturated aqueous solution of NaHCO<sub>3</sub> (~100 mL). The 2

layers were separated and the organic layer was washed with brine (~ 100 mL), dried over MgSO<sub>4</sub>, filtered and concentrated under vacuum to afford the product as a yellow oil (9.87 g, 84% purity). <sup>31</sup>P NMR (162 MHz, CDCl<sub>3</sub>): δ = 31.0 (d, *J* = 543 Hz, 84%), 17.4 (s, 3%) and 7.3 (d, 13%). <sup>1</sup>H NMR (400 MHz, CDCl<sub>3</sub>): δ = 6.96 (d, *J* = 543 Hz, 1H), 4.09-4.32 (m, 2H), 3.63-3.82 (m, 4H), 1.50 (d, *J* = 12.6 Hz, 3H), 1.40 (t, *J* = 7.0 Hz, 3H), 1.24 (t, *J* = 7.1 Hz, 3H), 1.24 (t, *J* = 7.0 Hz, 3H).

To a solution of *ethyl (1,1-diethoxyethyl)-H-phosphinate* (6 g, 28.6 mmol, 1 equiv, 84% purity) in toluene (40 mL) was added L-menthol (17.85 g, 114 mmol, 4 equiv) followed by Ti(OiPr)<sub>4</sub> (0.85 mL, 2.86 mmol, 10 mol%). The reaction mixture was stirred for 24 hours under N<sub>2</sub> at a slow reflux with a Dean-Stark trap to remove the ethanol generated during the reaction. After cooling down the reaction to rt, the solvent was removed under vacuum and the residue was purified by column chromatography (dichloromethane/acetone 100:0 to 95:5) to afford the product a colorless oil (5.44 g, 72%). <sup>31</sup>P NMR (162 MHz, CDCl<sub>3</sub>): δ = 29.8 (s, 51%), 25.3 (s, 49%).

**(*R<sub>p</sub>*)/(*S<sub>p</sub>*) Menthyl hydroxymethyl(1,1-diethoxyethyl)phosphinate 41:**

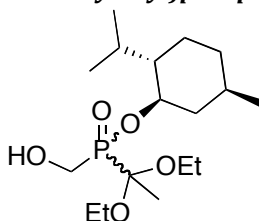

To a solution of *menthyl (1,1-diethoxyethyl)-H-phosphinate* (5.12 g, 16 mmol, 1 equiv, 51:49 dr) in toluene (30 mL) was added paraformaldehyde (0.53 g, 17.6 mmol, 1.1 equiv). The reaction mixture was stirred in a sealed tube at reflux for 20 hours under N<sub>2</sub>. After cooling down the reaction to rt, the solvent was removed under vacuum and the residue was purified by column chromatography (dichloromethane/acetone 100:0 to 90:10) to afford the product a colorless oil (2.58 g, 46%). <sup>31</sup>P NMR (162 MHz, CDCl<sub>3</sub>): δ = 42.0 (s, 54%) and 41.7 (s, 46%).

**(*R<sub>p</sub>*)/(*S<sub>p</sub>*) Menthyl benzoxymethyl (hydroxymethyl)phosphinate 44:**

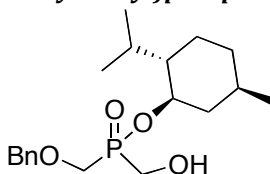

To a solution of (*R<sub>p</sub>*)/(*S<sub>p</sub>*)-2 (4.68 g, 20 mmol, 1 equiv, 54:46 dr) in dichloromethane (30 mL) at 0°C and under N<sub>2</sub> was added bis(trimethylsilyl)acetamide (10 mL, 40 mmol, 2 equiv) followed by benzyl chloromethyl ether (5.6 mL, 40 mmol, 2 equiv). The ice-bath was removed and the reaction mixture was then stirred for 20 h at rt. Methanol was added (1.62 mL, 40 mmol, 2 equiv) and the reaction mixture was concentrated under vacuum. The residue obtained was dissolved in ethyl acetate and the organic layer was washed with a saturated aqueous solution of NaHCO<sub>3</sub> and brine. The organic layer was dried over MgSO<sub>4</sub>, filtered and concentrated under vacuum. The crude obtained was purified by column chromatography (dichloromethane/acetone 10:0 to 9:1) to afford the product as white solid (5.27 g, 74%). <sup>31</sup>P NMR (162 MHz, CDCl<sub>3</sub>): δ = 41.8 (s, 40%), 41.7 (s, 60%).

**(*R<sub>p</sub>*)/(*S<sub>p</sub>*) Menthyl acetoxyethyl(hydroxymethyl)phosphinate 45:**

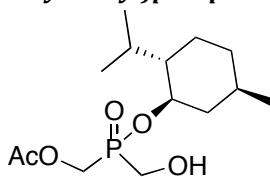

Paraformaldehyde (4.95 g, 165 mmol, 1.1 equiv) and hypophosphorous acid (9.9 g, 150 mmol, 1 equiv, 50% in water) were introduced in a round bottom flask and the reaction mixture was stirred for 24h at 75°C. The reaction was cooled down to rt and the crude was diluted in toluene (150 mL). L-

menthol (23.44 g, 150 mmol, 1 equiv) was added and the reaction mixture was stirred for 24h at reflux under N<sub>2</sub> in a flask equipped with a Dean-Stark trap. The solvent was then removed under vacuum and the residue obtained was dissolved in dichloromethane (300 mL). triethylamine (26 mL, 187.5 mmol, 1.25 equiv) and acetic anhydride (17.1 mL, 180 mmol, 1.2 equiv) was then added at 0°C under N<sub>2</sub>. The ice-bath was removed and the reaction mixture was stirred for 16h at rt. The solvent was removed under vacuum and the residue obtained was solubilized in ethyl acetate. The organic layer was washed with NaHCO<sub>3</sub> and brine, dried over MgSO<sub>4</sub>, filtered and concentrated under vacuum to afford the product as a white solid (38.7 g, 93%, 46:54 dr). <sup>31</sup>P NMR (162 MHz, CDCl<sub>3</sub>): δ = 25.9 (dm, *J* = 567 Hz, 46%), 21.9 (dm, *J* = 567 Hz, 54%).

To a solution of *menthyl (acetoxymethyl)-H-phosphinate* (38.7 g, 140 mmol, 1 equiv, 46:54 dr) in toluene (250 mL) was added paraformaldehyde (5.11 g, 170 mmol, 1.2 equiv) and the reaction was stirred at reflux under N<sub>2</sub> for 16 hours. The solvent was removed under vacuum to afford the product as a white solid (42.7 g, 100%, 52:48 dr). <sup>31</sup>P NMR (162 MHz, CDCl<sub>3</sub>): δ = 43.8 (s, 52%), 43.3 (s, 48%).

#### ***Menthyl [(3,5-dinitrobenzoyloxy)methyl](acetoxymethyl)phenylphosphinate 46:***

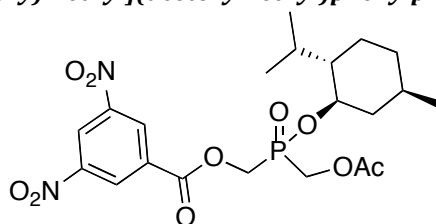

To a solution of (*R<sub>p</sub>*)/(*S<sub>p</sub>*)-45 (9.18 g, 30 mmol, 1 equiv, 54:46 dr) in dichloromethane (60 mL) was added at 0°C under N<sub>2</sub> triethylamine (4.81 mL, 34.5 mmol, 1.15 equiv) followed by 3,5-dinitrobenzoyl chloride (7.61 g, 33 mmol, 1.1 equiv) in dichloromethane (20 mL). The reaction mixture was then stirred for 20 hours at rt. The reaction mixture was concentrated under vacuum. The residue was dissolved in ethyl acetate (~ 100 mL) and the organic layer was washed with an aqueous solution of NaHCO<sub>3</sub> (~ 100 mL) and brine (~ 100 mL), dried over MgSO<sub>4</sub>, filtered and concentrated under vacuum. The crude obtained was crystallized in toluene (80 mL) to obtain the product as yellow needles (4.35 g, 29%, >99% de). Mp = 139-140°C; <sup>31</sup>P NMR (121.47 MHz, CDCl<sub>3</sub>): δ = 34.9 (s); <sup>1</sup>H NMR (400 MHz, CDCl<sub>3</sub>): δ = 9.27 (s, 1H), 9.17 (s, 2H), 4.71-4.84 (m, 2H), 4.48-4.57 (m, 2H), 4.36-4.47 (m, 1H), 2.13-2.22 (m, 1H), 2.15 (s, 3H), 2.02-2.11 (m, 1H), 1.65-1.74 (m, 2H), 1.36-1.57 (m, 2H), 1.25 (d, *J* = 11.8 Hz, 1H), 1.04 (d, *J* = 13.2 Hz, 1H), 0.85-0.97 (m, 1H), 0.94 (d, *J* = 6.2 Hz, 3H), 0.90 (d, *J* = 6.3 Hz, 3H), 0.82 (d, *J* = 6.7 Hz, 3H); <sup>13</sup>C NMR (101 MHz, CDCl<sub>3</sub>): δ = 169.9 (d, *J*<sub>PCOC</sub> = 7.2 Hz), 162.0 (d, *J*<sub>PCOC</sub> = 7.1 Hz), 148.8 (2C), 132.6, 129.6 (2C), 123.0, 79.1 (d, *J*<sub>POC</sub> = 7.8 Hz), 60.0 (d, *J*<sub>PC</sub> = 112 Hz), 59.0 (d, *J*<sub>PC</sub> = 114 Hz), 48.4 (d, *J*<sub>POCC</sub> = 5.9 Hz), 43.4, 33.8, 31.6, 25.9, 22.8, 21.9, 20.8, 20.5, 15.6; HRMS (EI+) *m/z* calcd for C<sub>21</sub>H<sub>30</sub>N<sub>2</sub>O<sub>10</sub>P ([M+H]<sup>+</sup>) 501.1638, found 501.1621; [α]<sub>D</sub><sup>25</sup> = -18.2° (chloroform).

#### ***(R<sub>p</sub>)-Menthyl phenyl-H-phosphinate 1:***<sup>1</sup>

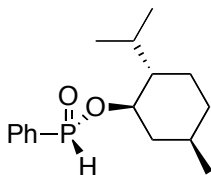

To a solution of (*R<sub>p</sub>*)/(*S<sub>p</sub>*)-1 (8.4 g, 30 mmol, 1 equiv, 50:50 dr) in diethylether (200 mL) was slowly added at rt under N<sub>2</sub> phosphorus trichloride (3.14 mL, 36 mmol, 1.2 equiv) followed by pyridine (2.91 mL, 36 mmol, 1.2 equiv). After 2 hours at rt, the reaction was cooled down to -78°C and then a mixture of diethylether – water (50 mL) was added over 20 minutes. After 4 hours at -78°C, the reaction was allowed to warm up to rt. Brine was added and the 2 layers were separated. The organic layer was dried over magnesium sulfate, filtered and concentrated. The crude obtained was purified by column chromatography (hexane/ethyl acetate 7:3) to afford the product as a colorless oil (7.3 g, 65%, 63% de). The oil obtained was crystallized in petroleum ether (7.5 mL) at -30°C to afford the product as a colorless oil (2.5 g, 22%, 96% de). <sup>31</sup>P NMR (162 MHz, CDCl<sub>3</sub>): δ = 24.7 (dm, *J* = 553 Hz);

<sup>1</sup>H NMR (400 MHz, CDCl<sub>3</sub>): δ = 7.73-7.84 (m, 2H), 7.66 (d, *J* = 553 Hz, 1H), 7.46-7.64 (m, 3H), 4.22-4.36 (m, 1H), 2.14-2.27 (m, 2H), 1.62-1.75 (m, 2H), 1.38-1.54 (m, 2H), 1.24 (q, *J* = 11.2 Hz, 1H), 0.78-1.13 (m, 2H), 0.96 (d, *J* = 7.0 Hz, 3H), 0.90 (d, *J* = 6.4 Hz, 3H), 0.86 (d, *J* = 7.0 Hz, 3H); [α]<sub>D</sub><sup>23</sup> = -35.5° (chloroform, literature with 90% de: -21.0° in benzene).

<sup>1</sup>O. Berger, J.-L. Montchamp *Angew. Chem. Int. Ed.* **2013**, *52*, 11377-11380.

<sup>2</sup>O. Berger, J.-L. Montchamp *Chemistry - A European Journal* **2014**, *20*, 12385-12388.

<sup>3</sup>H. C. Fisher, O. Berger, F. Gelat, J.-L. Montchamp *Adv. Synth. Catal.* **2014**, *356*, 1199-1204.

<sup>4</sup>J.-L. Montchamp, O. Berger U.S. Pat. Appl. Publ. 2013, US 20130331594 A1 20131212.

<sup>5</sup>Y.-R. Chen, W.-L. Duan *J. Am. Chem. Soc.* **2013**, *135*, 16754-16757.

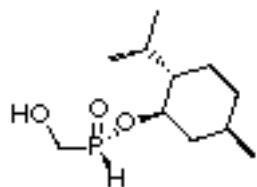

Compound (R<sub>p</sub>)-2  
<sup>31</sup>P/<sup>1</sup>H NMR decoupled

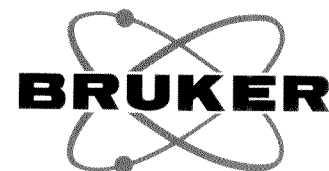

Current Data Parameters  
 NAME OB 1883 after crystallization  
 EXPNO 1  
 PROCNO 1

F2 - Acquisition Parameters  
 Date\_ 20150114  
 Time\_ 10.09  
 INSTRUM spect  
 PROBHD 5 mm PABBO BB/  
 PULPROG zgpg30  
 TD 65536  
 SOLVENT CDC13  
 NS 16  
 DS 4  
 SWH 64102.563 Hz  
 FIDRES 0.978127 Hz  
 AQ 0.5111809 sec  
 RG 203.57  
 DW 7.800 usec  
 DE 6.50 usec  
 TE 298.4 K  
 D1 2.0000000 sec  
 D11 0.0300000 sec  
 TD0 1

===== CHANNEL f1 =====  
 SFO1 161.9674942 MHz  
 NUC1 31P  
 P1 14.25 usec  
 PLW1 15.0000000 W

===== CHANNEL f2 =====  
 SFO2 400.1316005 MHz  
 NUC2 1H  
 CPDPRG2 waltz16  
 PCPD2 90.00 usec  
 PLW2 10.0000000 W  
 PLW12 0.31604999 W  
 PLW13 0.25600001 W

F2 - Processing parameters  
 SI 32768  
 SF 161.9755930 MHz  
 WDW EM  
 SSB 0  
 LB 1.00 Hz  
 GB 0  
 PC 1.40

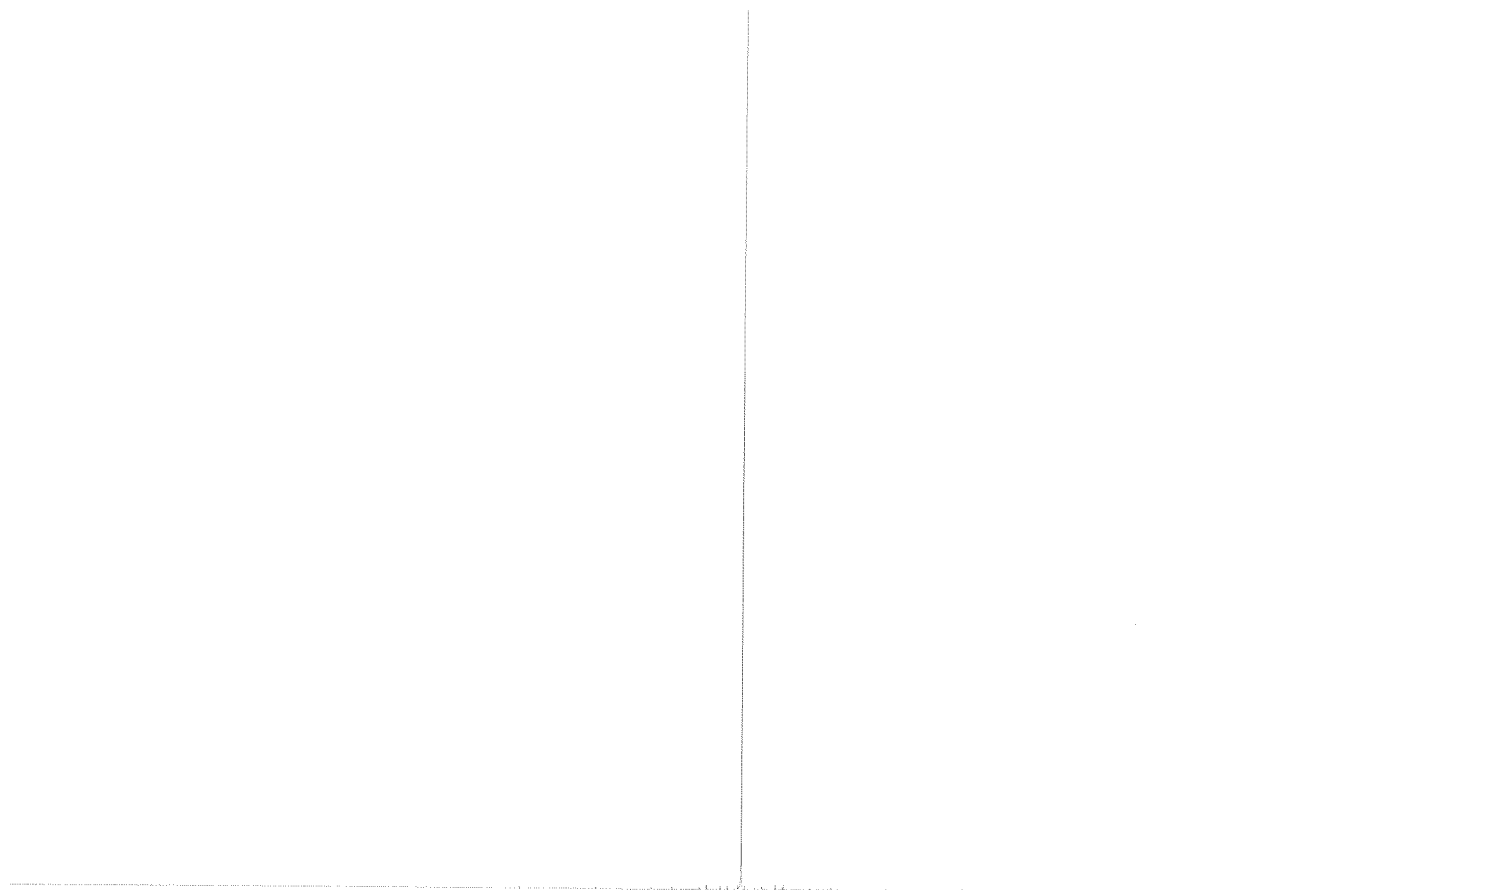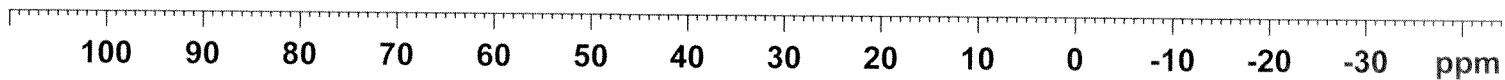



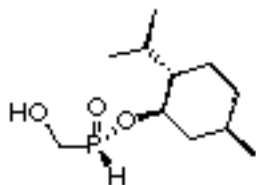

Compound (R<sub>p</sub>)-2  
<sup>31</sup>P/<sup>1</sup>H NMR coupled

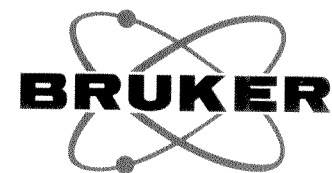

Current Data Parameters  
NAME OB 1883 after crystallization  
EXPNO 2  
PROCNO 1

F2 - Acquisition Parameters  
Date\_ 20150114  
Time\_ 10.11  
INSTRUM spect  
PROBHD 5 mm PABBO BB/  
PULPROG zg30  
TD 65536  
SOLVENT CDCl3  
NS 32  
DS 4  
SWH 64102.563 Hz  
FIDRES 0.978127 Hz  
AQ 0.5111808 sec  
RG 203.57  
DW 7.800 usec  
DE 6.50 usec  
TE 298.1 K  
D1 2.0000000 sec  
TD0 1

===== CHANNEL f1 =====  
SF01 161.9674942 MHz  
NUC1 31P  
P1 14.25 usec  
PLW1 15.0000000 W

F2 - Processing parameters  
SI 32768  
SF 161.9755930 MHz  
WDW EM  
SSB 0  
LB 1.00 Hz  
GB 0  
PC 1.40

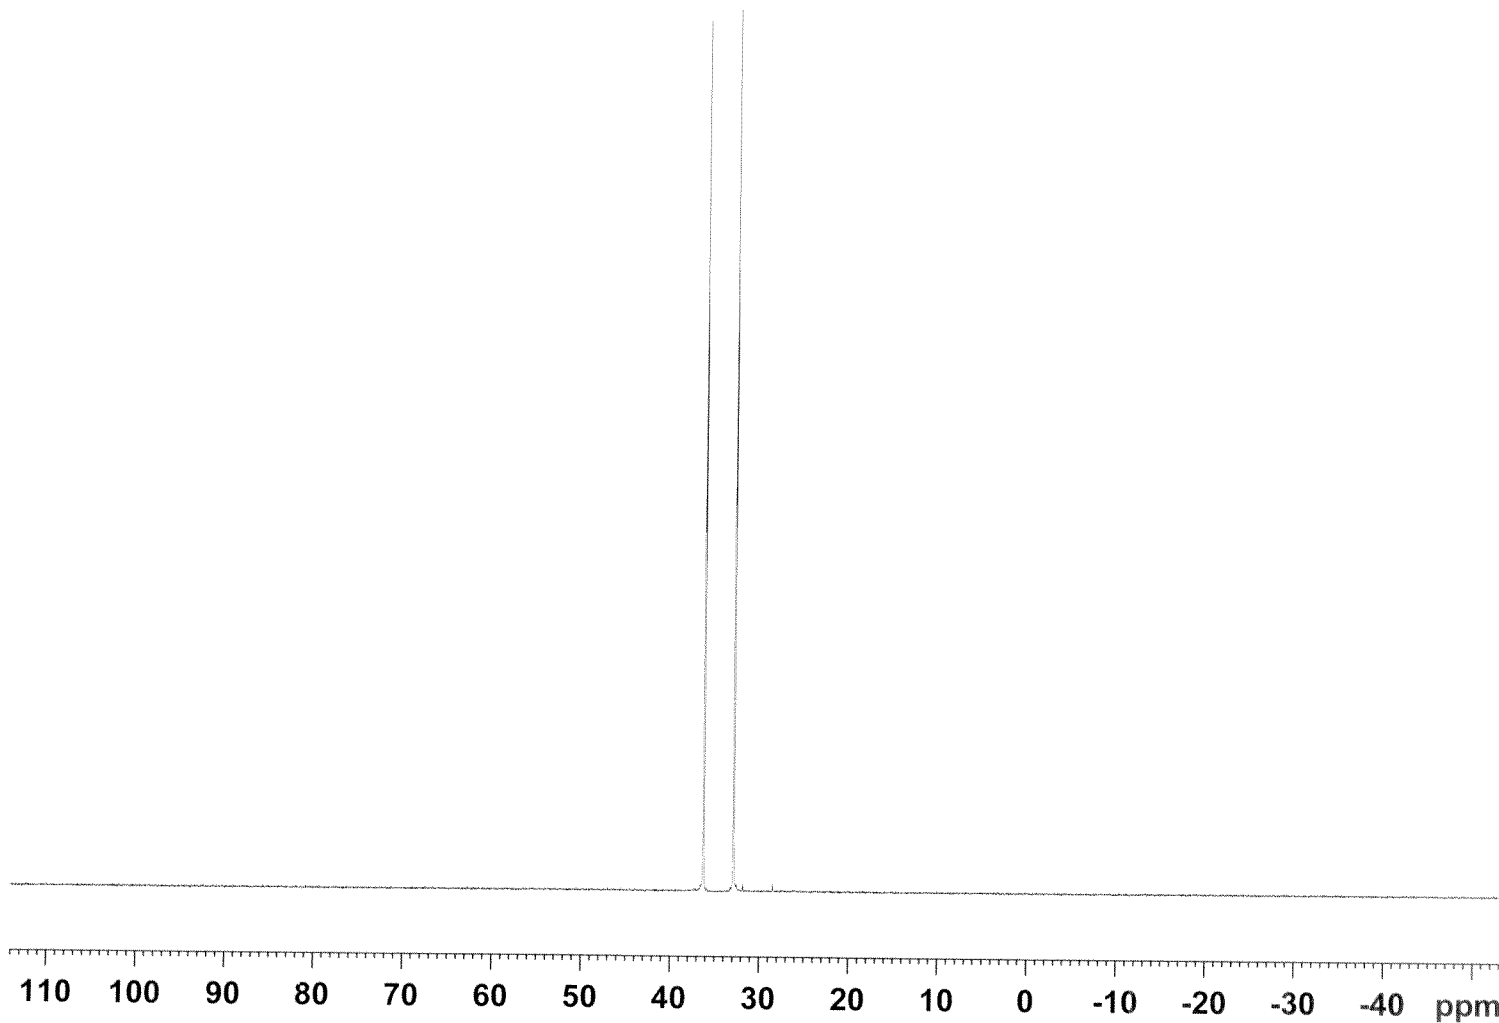

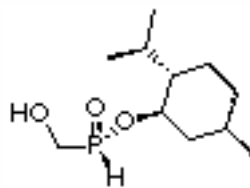

Compound (R<sub>p</sub>)-2  
<sup>1</sup>H NMR

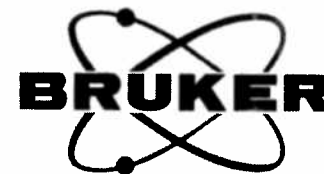

Current Data Parameters  
 NAME OB 1883 after crystallization  
 EXPNO 3  
 PROCNO 1

F2 - Acquisition Parameters  
 Date\_ 20150114  
 Time\_ 10.13  
 INSTRUM spect  
 PROBHD 5 mm PABBO BB/  
 PULPROG zg30  
 TD 65536  
 SOLVENT CDCl3  
 NS 11  
 DS 2  
 SWH 8012.820 Hz  
 FIDRES 0.122266 Hz  
 AQ 4.089465 sec  
 RG 18.98  
 DW 62.400 usec  
 DE 6.50 usec  
 TE 298.0 K  
 D1 1.00000000 sec  
 TDO 1

===== CHANNEL f1 =====  
 SFO1 400.1324710 MHz  
 NUC1 1H  
 P1 10.00 usec  
 PLW1 25.00300026 W

F2 - Processing parameters  
 SI 65536  
 SF 400.1300000 MHz  
 WDW EM  
 SSB 0  
 LB 0.30 Hz  
 GB 0  
 PC 1.00

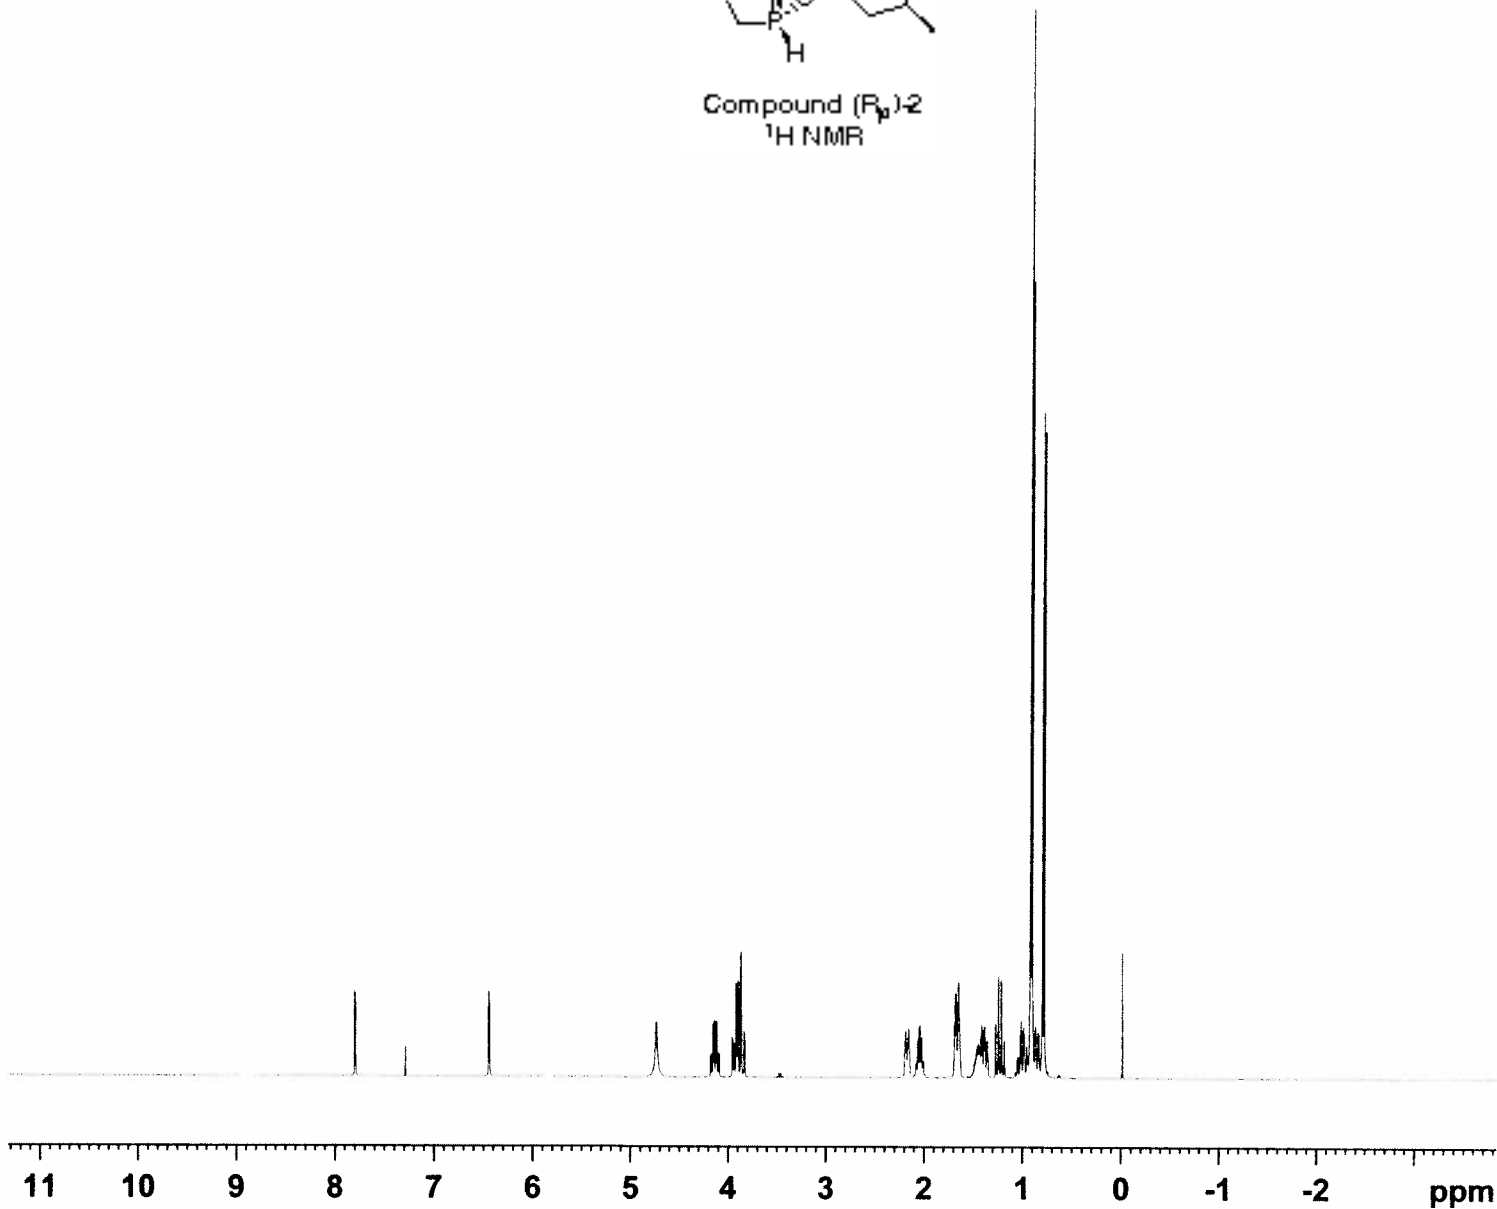

0.50

0.50

1.02

1.01

1.03

1.02

1.02

1.02

2.04

2.07

1.06

1.17

6.19

0.89

3.16

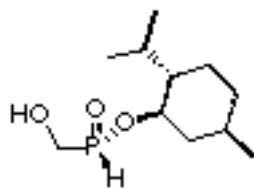

Compound (Rp)-2  
<sup>13</sup>C NMR

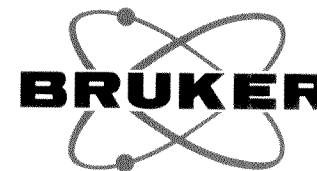

Current Data Parameters  
 NAME OB 1883 after crystallization  
 EXPNO 4  
 PROCNO 1

F2 - Acquisition Parameters  
 Date\_ 20150114  
 Time\_ 10.46  
 INSTRUM spect  
 PROBHD 5 mm PABBO BB/  
 PULPROG zgpg30  
 TD 65536  
 SOLVENT CDC13  
 NS 545  
 DS 4  
 SWH 24038.461 Hz  
 FIDRES 0.366798 Hz  
 AQ 1.3631488 sec  
 RG 203.57  
 DW 20.800 usec  
 DE 6.50 usec  
 TE 299.3 K  
 D1 2.0000000 sec  
 D11 0.0300000 sec  
 TD0 1

===== CHANNEL f1 =====  
 SFO1 100.6228293 MHz  
 NUC1 13C  
 P1 10.00 usec  
 PLW1 45.00000000 W

===== CHANNEL f2 =====  
 SFO2 400.1316005 MHz  
 NUC2 1H  
 CPDPRGf2 waitz16  
 PCPD2 90.00 usec  
 PLW2 10.00000000 W  
 PLW12 0.31604999 W  
 PLW13 0.25600001 W

F2 - Processing parameters  
 SI 32768  
 SF 100.6127685 MHz  
 WDW EM  
 SSB 0  
 LB 1.00 Hz  
 GB 0  
 PC 1.40

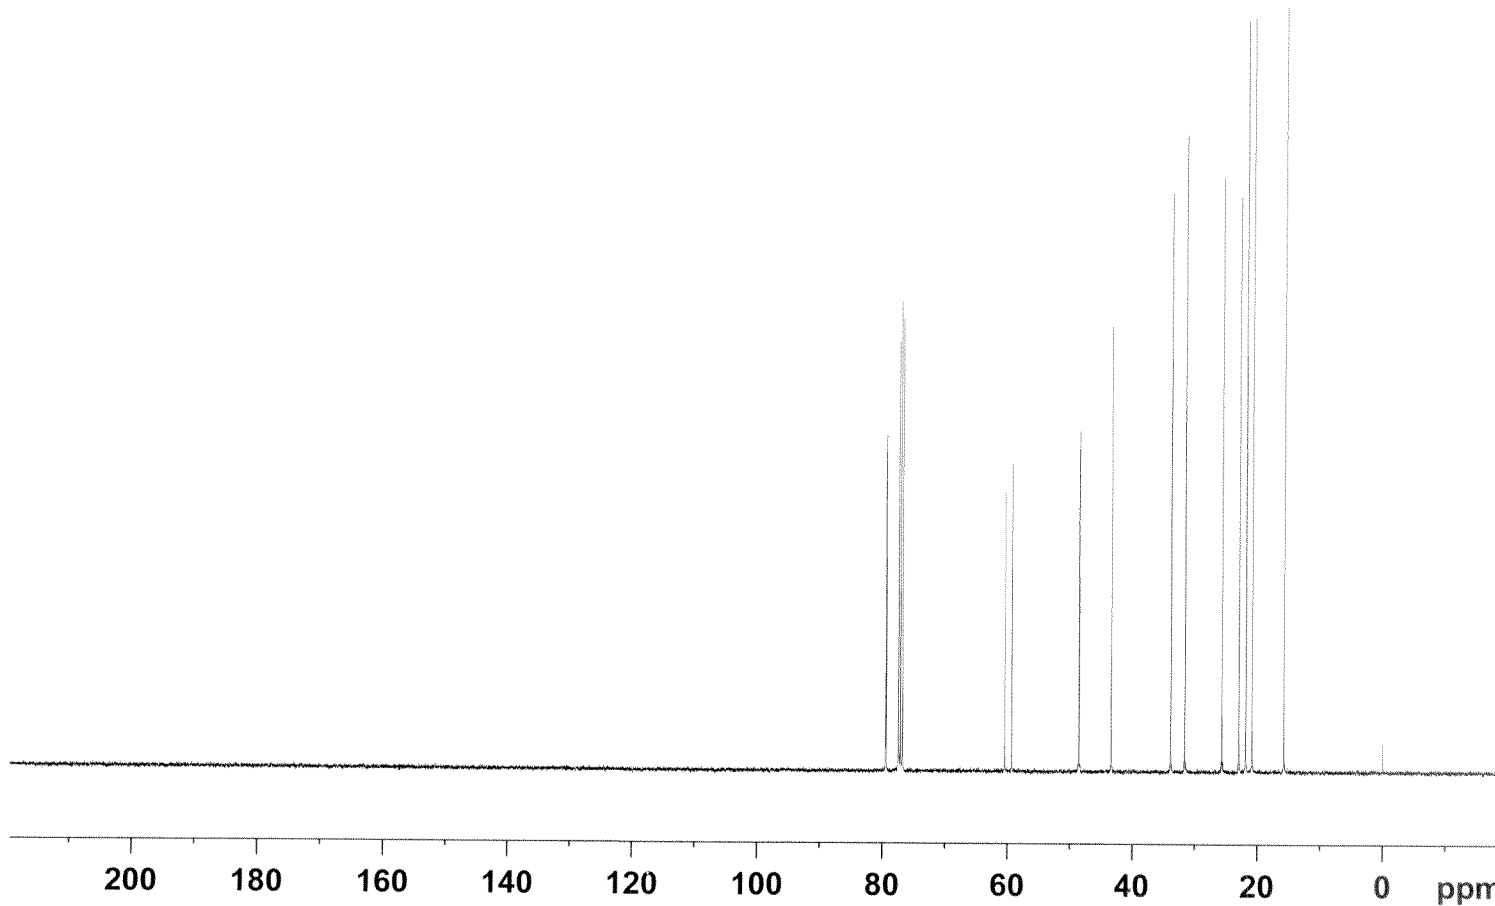

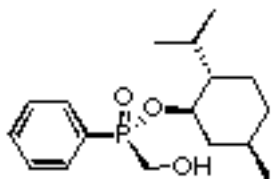

Compound (S<sub>p</sub>)-3  
<sup>31</sup>P/<sup>1</sup>H NMR decoupled

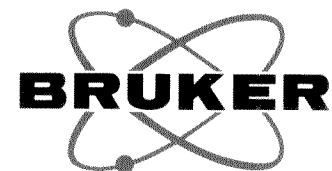

Current Data Parameters  
 NAME OB 1888 2nd crystallization in Et2O  
 EXPNO 1  
 PROCNO 1

F2 - Acquisition Parameters  
 Date\_ 20150212  
 Time\_ 12.16  
 INSTRUM spect  
 PROBHD 5 mm PABBO BB/  
 PULPROG zgpg30  
 TD 65536  
 SOLVENT CDCl3  
 NS 16  
 DS 4  
 SWH 64102.563 Hz  
 FIDRES 0.978127 Hz  
 AQ 0.5111808 sec  
 RG 203.57  
 DW 7.880 usec  
 DE 6.50 usec  
 TE 297.4 K  
 D1 2.00000000 sec  
 D11 0.03000000 sec  
 TDO 1

\*\*\*\*\* CHANNEL f1 \*\*\*\*\*  
 SFO1 161.9674942 MHz  
 NUC1 31P  
 P1 14.25 usec  
 PLW1 15.00000000 W

\*\*\*\*\* CHANNEL f2 \*\*\*\*\*  
 SFO2 400.1316005 MHz  
 NUC2 1H  
 CPDPRG[2] waltz16  
 PCPD2 90.00 usec  
 PLW2 10.00000000 W  
 PLW12 0.31604999 W  
 PLW13 0.25600001 W

F2 - Processing parameters  
 S1 32768  
 SF 161.9755930 MHz  
 HDW EM  
 SSB 0  
 LB 1.00 Hz  
 GB 0  
 PC 1.40

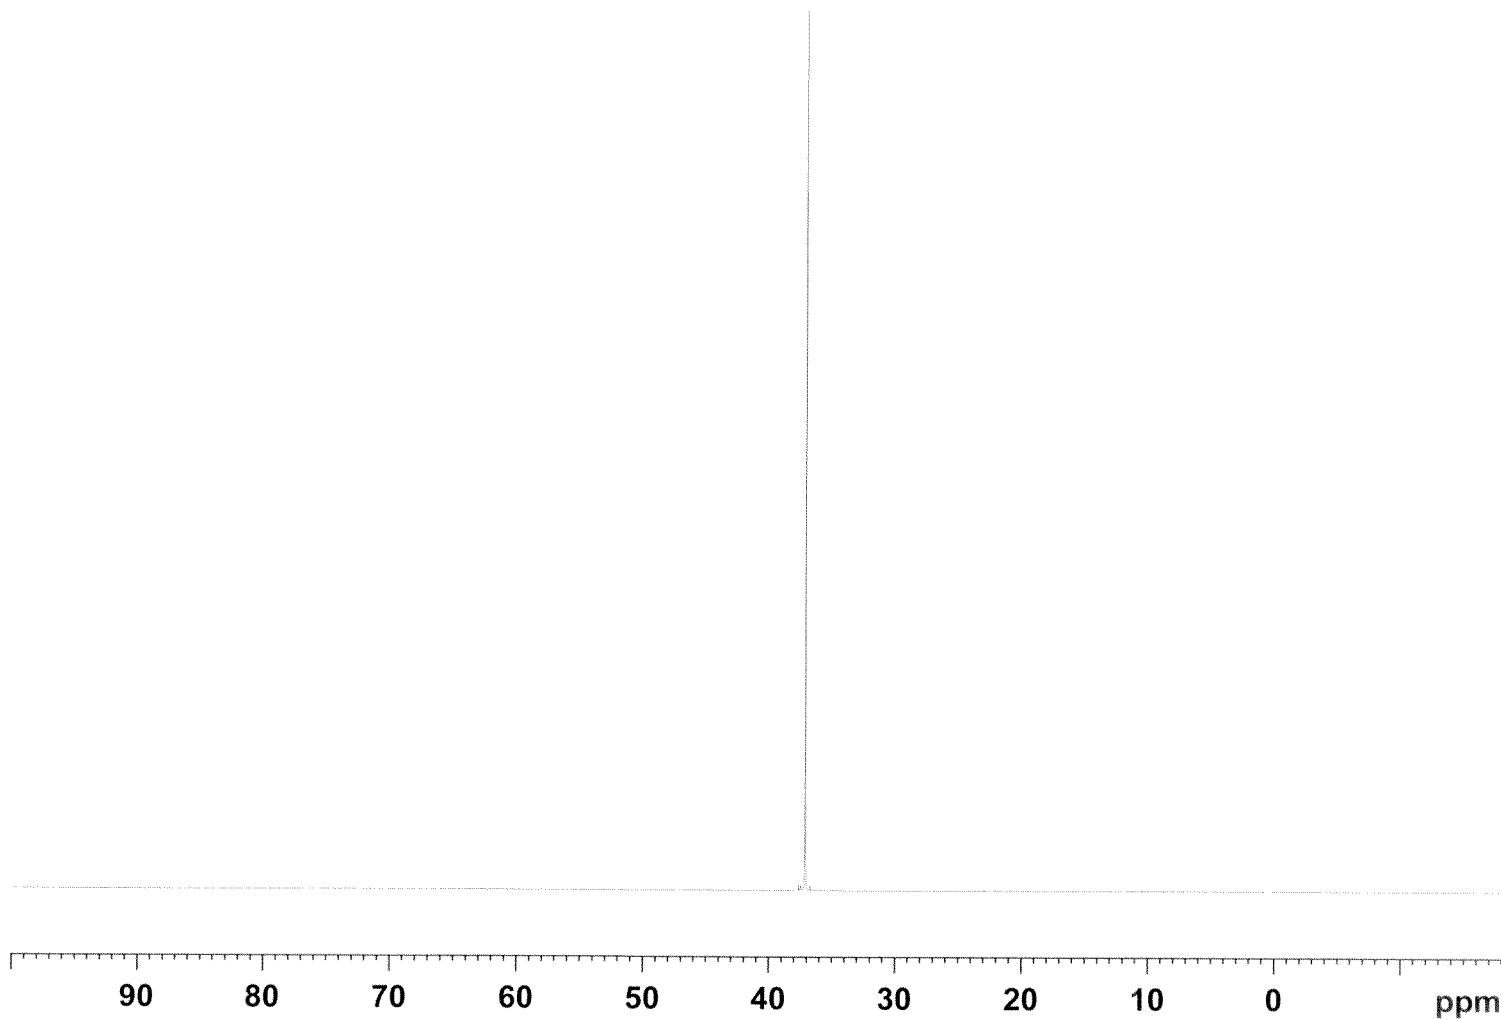

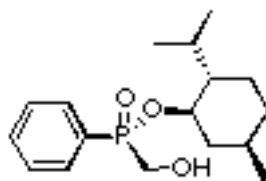

Compound (S<sub>p</sub>)-8  
<sup>31</sup>P/<sup>1</sup>H NMR coupled

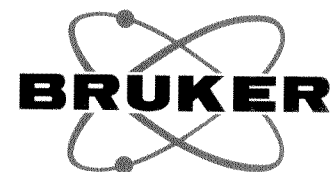

Current Data Parameters  
 NAME OB 1888 2nd crystallization in Et2O  
 EXPNO 2  
 PROCNO 1

F2 - Acquisition Parameters  
 Date\_ 20150212  
 Time\_ 12.17  
 INSTRUM spect  
 PROBHD 5 mm PABBO BB/  
 PULPROG zg30  
 TD 65536  
 SOLVENT CDCl3  
 NS 32  
 DS 4  
 SWH 64102.563 Hz  
 FIDRES 0.978127 Hz  
 AQ 0.5111808 sec  
 RG 203.57  
 DW 7.800 usec  
 DE 6.50 usec  
 TE 297.1 K  
 D1 2.0000000 sec  
 TDO 1

\*\*\*\*\* CHANNEL f1 \*\*\*\*\*  
 SFO1 161.9674942 MHz  
 NUC1 31P  
 P1 14.25 usec  
 PLW1 15.0000000 W

F2 - Processing parameters  
 SI 32768  
 SF 161.9755930 MHz  
 WDW EM  
 SSB 0  
 LB 1.00 Hz  
 GB 0  
 PC 1.40

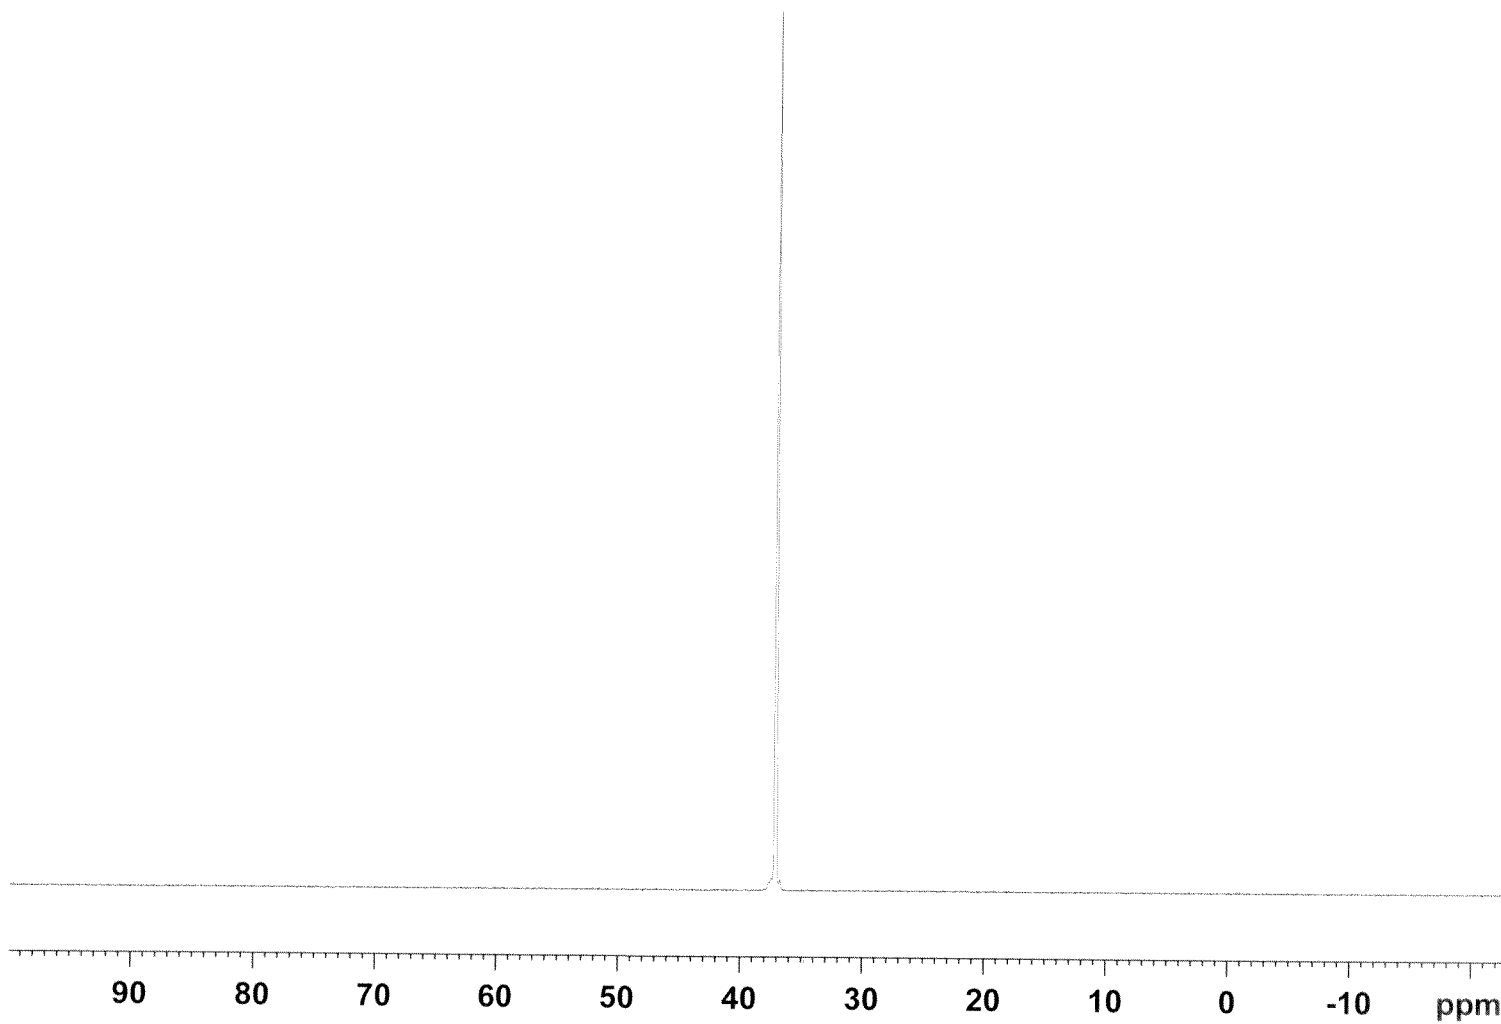

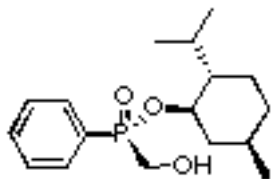

Compound (S<sub>p</sub>)-3  
<sup>1</sup>H NMR

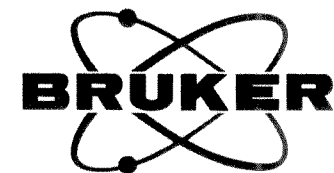

Current Data Parameters  
 NAME OB 1888 2nd crystallization in Et2O  
 EXPNO 3  
 PROCNO 1

F2 - Acquisition Parameters  
 Date\_ 20150212  
 Time\_ 12.21  
 INSTRUM spect  
 PROBHD 5 mm PABBO BB/  
 PULPROG zg30  
 TD 65536  
 SOLVENT CDCl3  
 NS 13  
 DS 2  
 SWH 8012.820 Hz  
 FIDRES 0.122266 Hz  
 AQ 4.0894465 sec  
 RG 16.39  
 DN 62.400 usec  
 DE 6.50 usec  
 TE 297.0 K  
 D1 1.0000000 sec  
 TDO 1

\*\*\*\*\* CHANNEL f1 \*\*\*\*\*  
 SF01 400.1324710 MHz  
 NUC1 1H  
 P1 10.00 usec  
 PLW1 25.00300026 W

F2 - Processing parameters  
 SI 65536  
 SF 400.1300000 MHz  
 WDW EM  
 SSB 0  
 LB 0.30 Hz  
 GB 0  
 PC 1.00

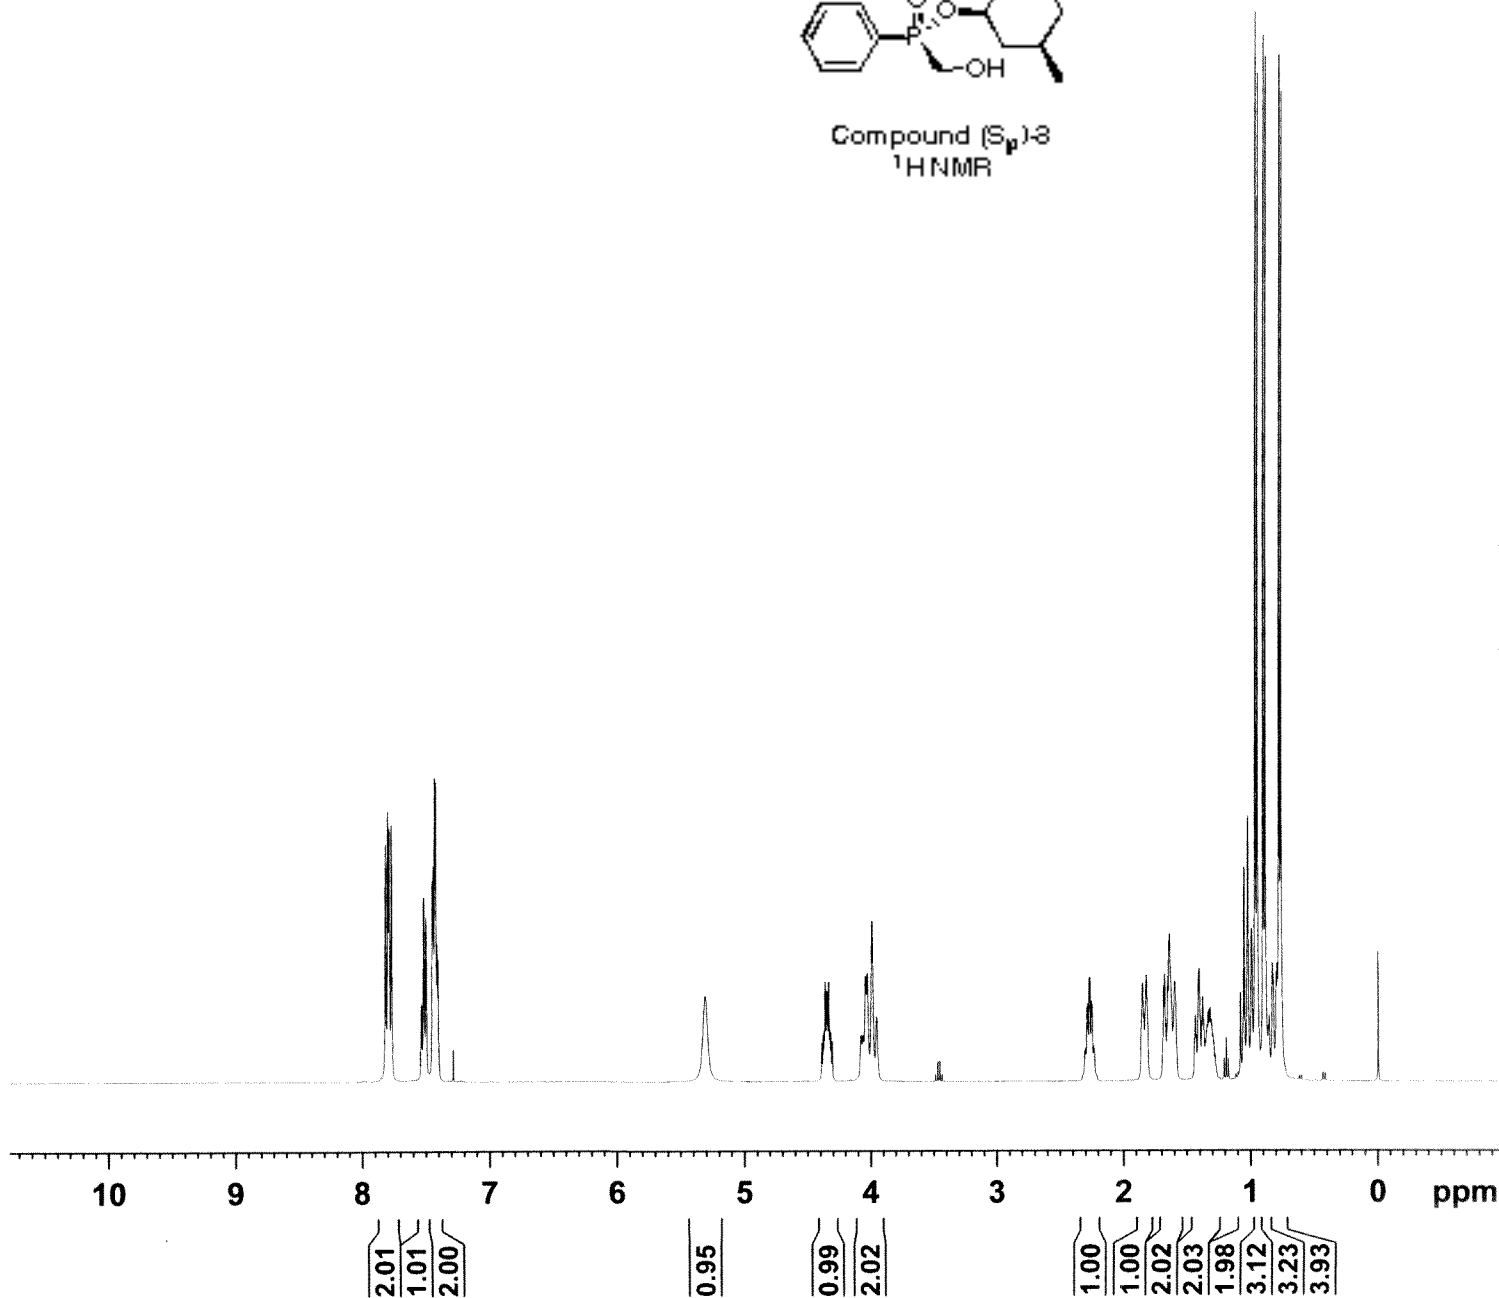

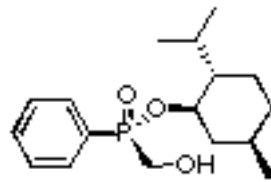

Compound (S<sub>P</sub>)-3  
<sup>13</sup>C NMR

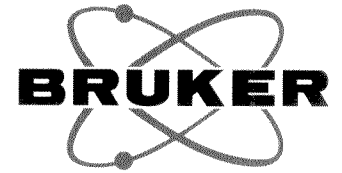

Current Data Parameters  
 NAME OB 1888 2nd crystallization in Et2O  
 EXPNO 4  
 PROCNO 1

F2 - Acquisition Parameters  
 Date\_ 20150212  
 Time 12.30  
 INSTRUM spect  
 PROBHD 5 mm PABBO BB/  
 PULPROG zgpg30  
 TD 65536  
 SOLVENT CDCl3  
 NS 120  
 DS 4  
 SWH 24038.461 Hz  
 FIDRES 0.366798 Hz  
 AQ 1.3631488 sec  
 RG 203.57  
 DW 20.800 usec  
 DE 6.50 usec  
 TE 298.1 K  
 D1 2.0000000 sec  
 D11 0.0300000 sec  
 TD0 1

\*\*\*\*\* CHANNEL f1 \*\*\*\*\*  
 SFO1 100.6228293 MHz  
 NUC1 13C  
 P1 10.00 usec  
 PLW1 45.0000000 W

\*\*\*\*\* CHANNEL f2 \*\*\*\*\*  
 SFO2 400.1316095 MHz  
 NUC2 1H  
 CPDPRG[2] waltz16  
 PCPD2 90.00 usec  
 PLW2 10.0000000 W  
 PLW12 0.31604999 W  
 PLW13 0.25600001 W

F2 - Processing parameters  
 SI 32768  
 SF 100.6127695 MHz  
 WDW EM  
 SSB 0  
 LB 1.00 Hz  
 GB 0  
 PC 1.40

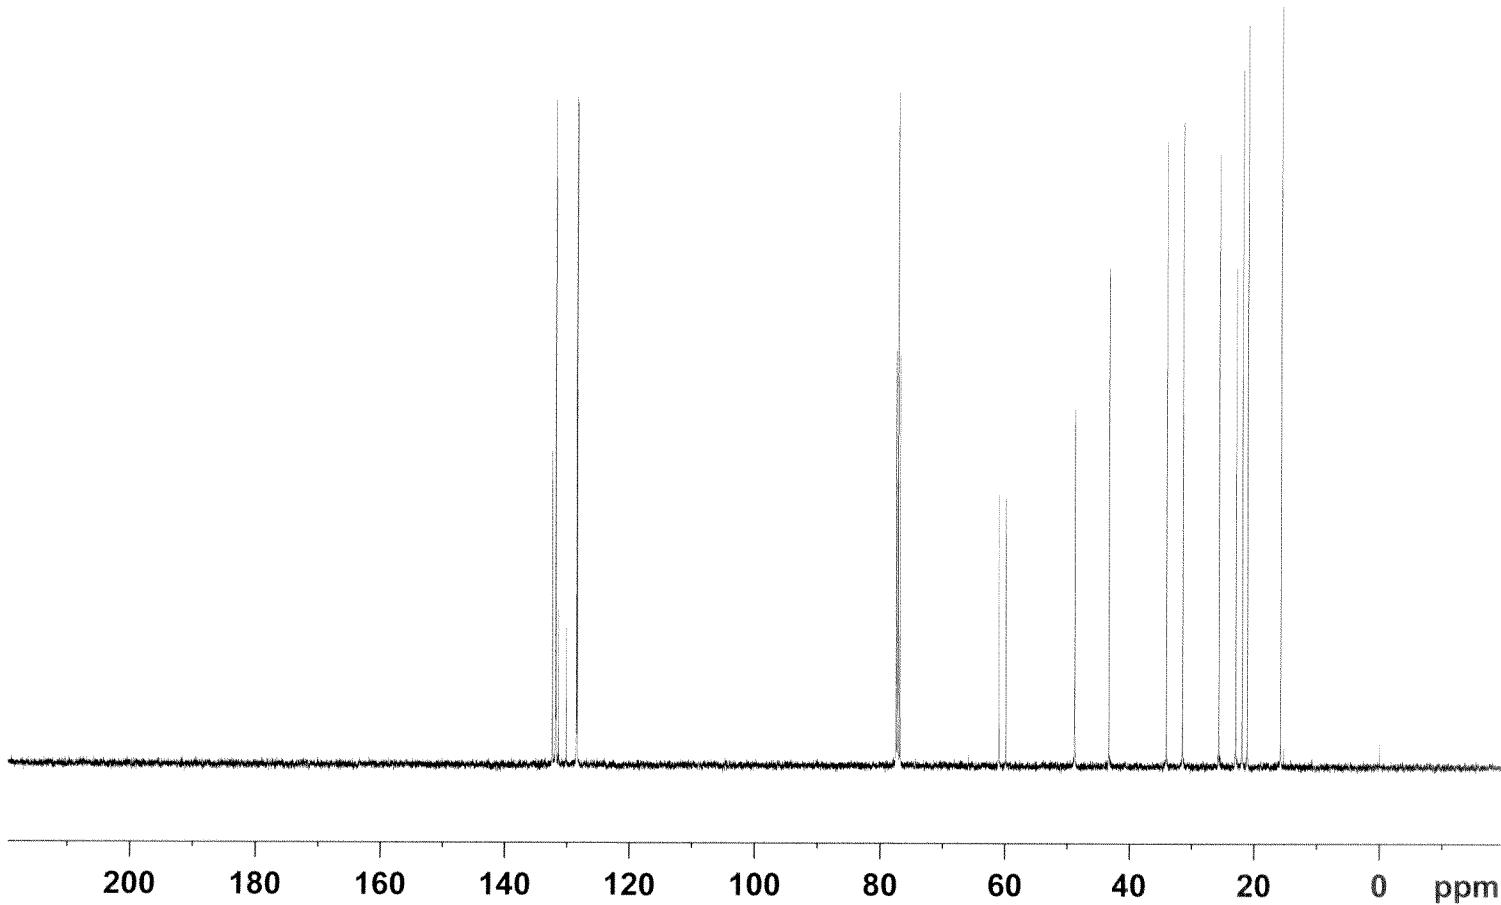

OB 900  
pad=10 run with findz0 before acquisition

expl Phosphorus

| SAMPLE              |                | SPECIAL    |          |
|---------------------|----------------|------------|----------|
| date                | Feb 1 2013     | temp       | not used |
| solvent             | cdc13          | gain       | 20       |
| file                | /home/TCUuser~ | spin       | 20       |
| /vnmrsys/data/autow |                | hst        | 0.008    |
| _2013.01.20/s_2013~ |                | pw90       | 18.300   |
| 0201_12/data/cdc13~ |                | alfa       | 10.000   |
| 02.fid              |                | FLAGS      |          |
| ACQUISITION         |                | il         | n        |
| sw                  | 15797.8        | in         | n        |
| at                  | 1.600          | dp         | y        |
| np                  | 50552          | hs         | ny       |
| fb                  | 8800           | PROCESSING |          |
| bs                  | 64             | lb         | 1.00     |
| d1                  | 1.000          | fn         | not used |
| nt                  | 16             | DISPLAY    |          |
| ct                  | 16             | sp         | -3647.3  |
| TRANSMITTER         |                | wp         | 15797.3  |
| tn                  | P31            | rfl        | 3647.8   |
| sfrq                | 121.465        | rfp        | 0        |
| tof                 | 7421.1         | rp         | 24.6     |
| tpwr                | 55             | lp         | -113.7   |
| pw                  | 9.150          | PLOT       |          |
| DECOUPLER           |                | wc         | 250      |
| dn                  | H1             | sc         | 0        |
| dof                 | 0              | vs         | 12       |
| dm                  | yyy            | th         | 7        |
| dmm                 | w              | ai         | cdc ph   |
| dpwr                | 35             |            |          |
| dmf                 | 6700           |            |          |

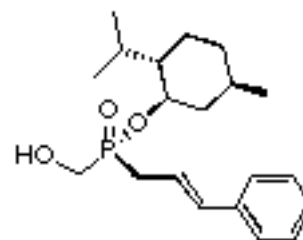

Compound (Rp)-4  
<sup>31</sup>P/<sup>1</sup>H NMR decoupled

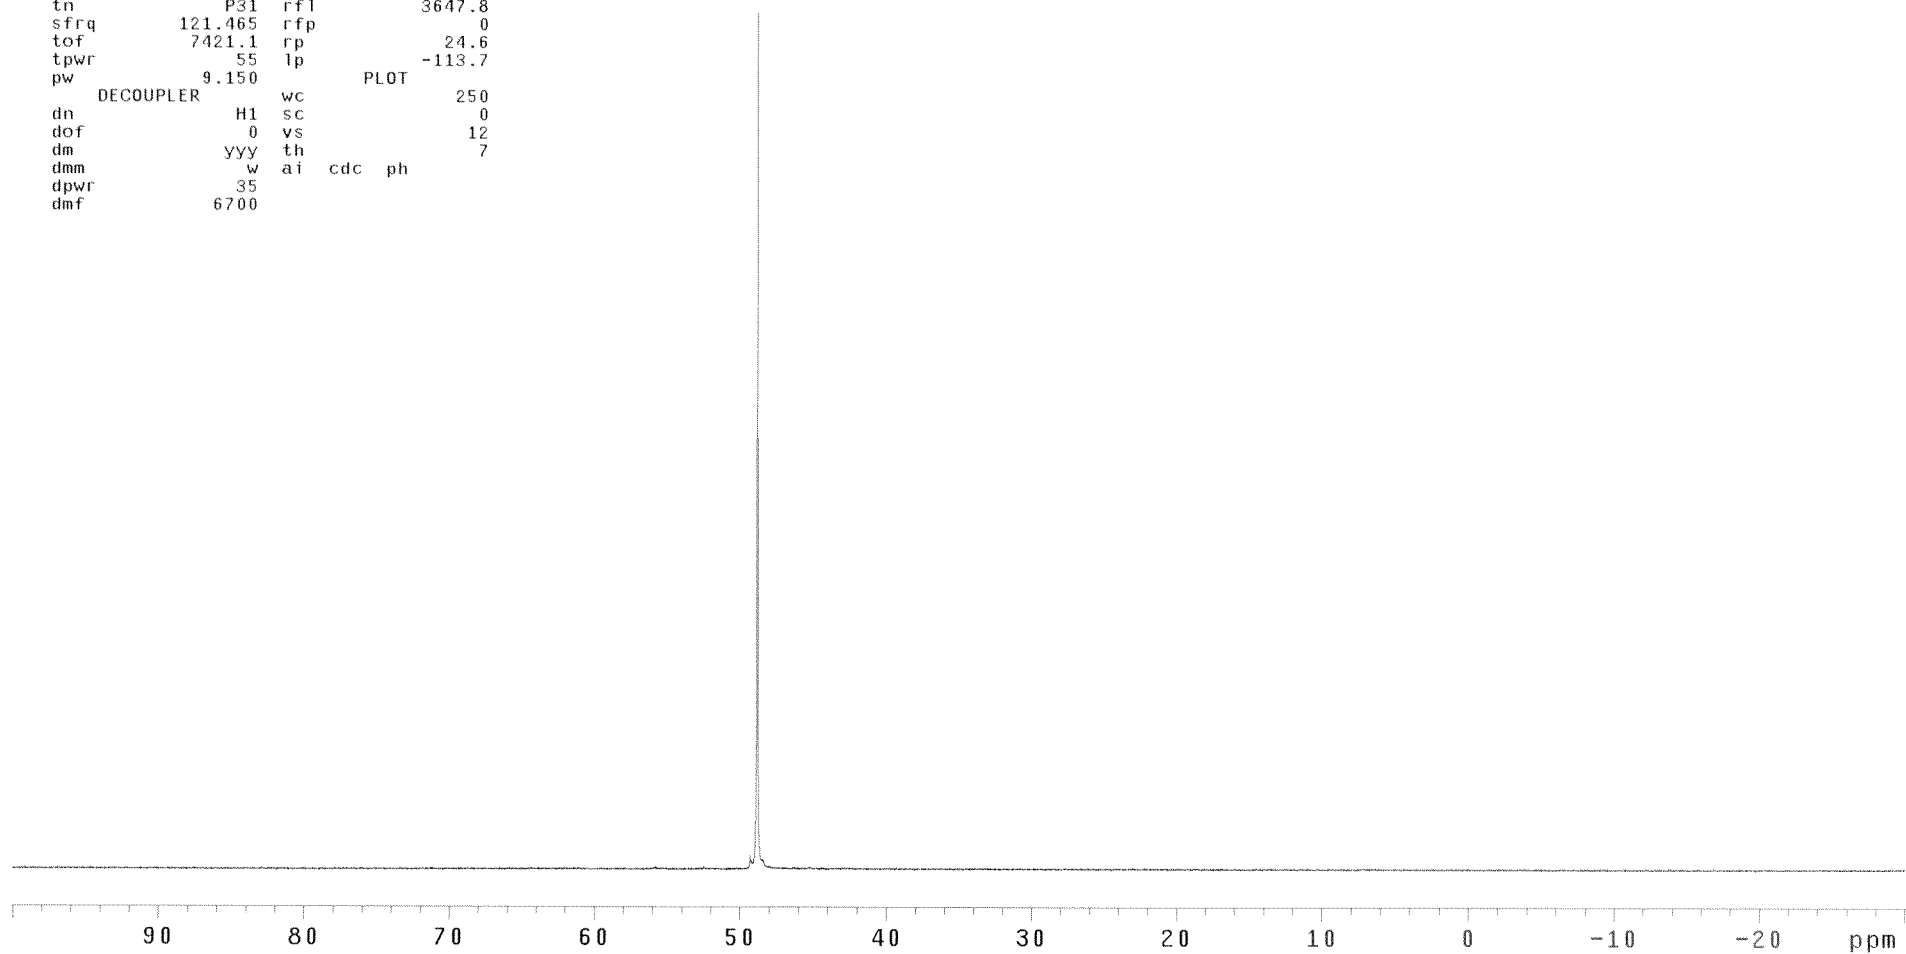



OB 900

exp1 Phosphorus

| SAMPLE              |                | SPECIAL    |          |
|---------------------|----------------|------------|----------|
| date                | Feb 1 2013     | temp       | not used |
| solvent             | cdc13          | gain       | 20       |
| file                | /home/TCUuser~ | spin       | 20       |
| /vnmrsys/data/auto~ |                | hst        | 0.008    |
| _2013.01.20/s_2013~ |                | pw90       | 18.300   |
| 0201_12/data/cdc13~ |                | alfa       | 10.000   |
| _04.fid             |                | FLAGS      |          |
| ACQUISITION         |                | PROCESSING |          |
| sw                  | 15797.8        | il         | n        |
| at                  | 1.600          | in         | n        |
| np                  | 50552          | dp         | y        |
| fb                  | 8800           | hs         | ny       |
| bs                  | 64             | lb         | 1.00     |
| d1                  | 1.000          | fn         | not used |
| nt                  | 16             | DISPLAY    |          |
| ct                  | 16             | sp         | -3647.3  |
| TRANSMITTER         |                | wp         | 15797.3  |
| tn                  | P31            | rfl        | 3647.8   |
| sfrq                | 121.465        | rfp        | 0        |
| tof                 | 7421.1         | rp         | 15.6     |
| tpwr                | 55             | lp         | -113.7   |
| pw                  | 9.150          | PLOT       |          |
| DECOUPLER           |                | wc         | 250      |
| dn                  | H1             | sc         | 0        |
| dof                 | 0              | vs         | 35       |
| dm                  | ynn            | th         | 3        |
| dmm                 | w              | ai         | cdc ph   |
| dpwr                | 35             |            |          |
| dmf                 | 6700           |            |          |

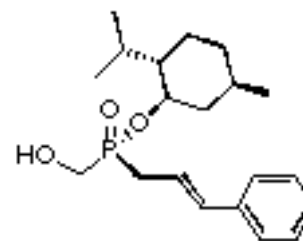

Compound (R<sub>p</sub>)<sub>4</sub>  
<sup>31</sup>P/<sup>1</sup>H NMR coupled

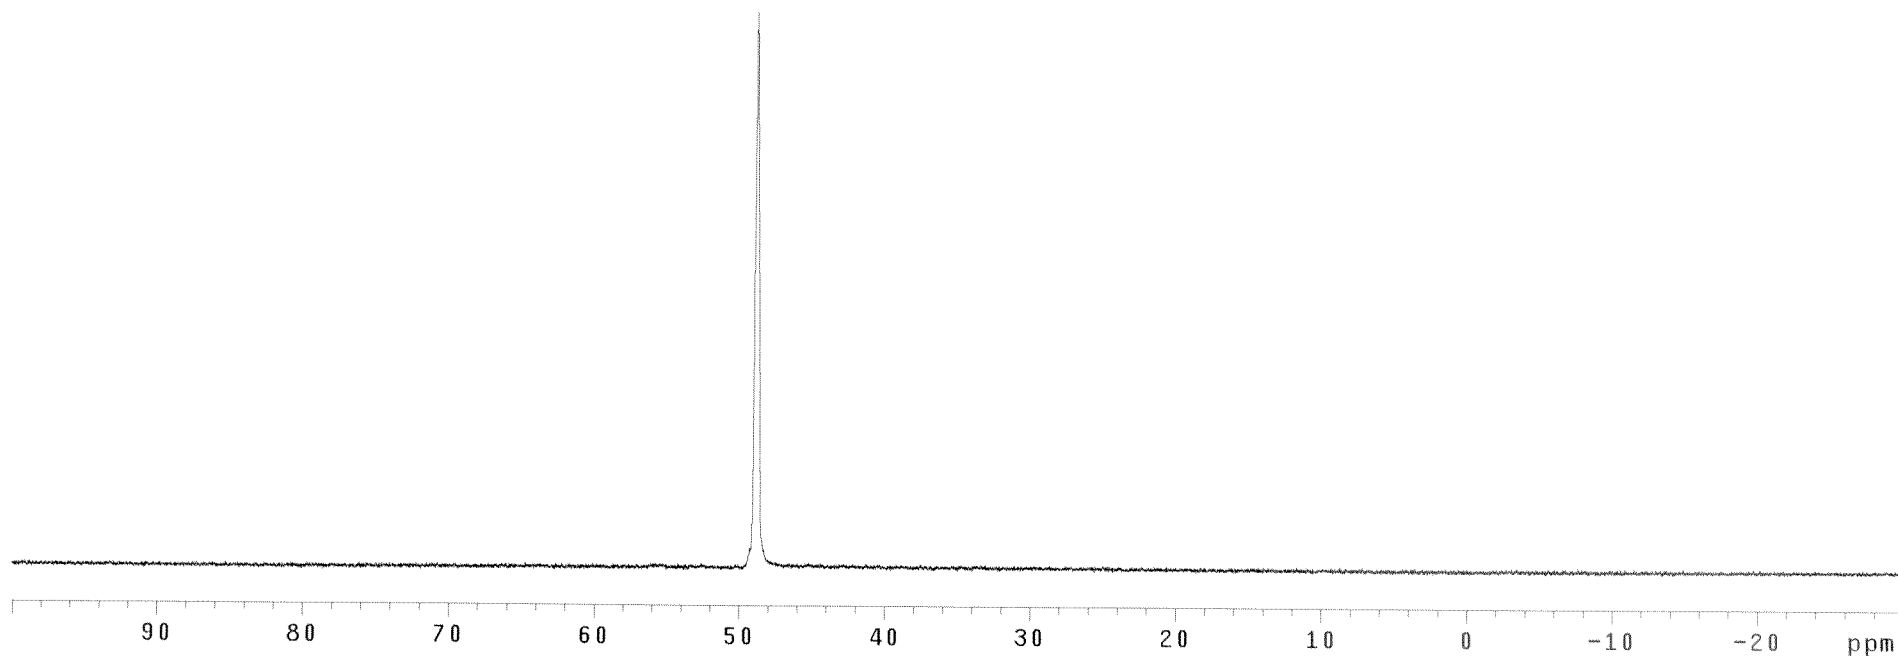

OB 900  
pad=10 run with findz0 before acquisition

exp1 Proton

```
SAMPLE          DEC. & VT
date Feb 1 2013 dfrq          75.454
solvent cdc13 dn             C13
file /home/TCUuser~ dpwr      43
/vnmrsys/data/auto~ dof       0
_2013.01.20/s_2013~ dm        nnn
0201_10/data/cdc13~ dmm       c
_01.fid dmf                 13100

ACQUISITION     PROCESSING
sfrq 300.047 wtfile
tn H1 proc ft
at 1.998 fn not used
np 19184
sw 4800.8 werr xmreact
fb 2600 wexp abortoff flus~
bs 16 h proclplot aborton
tpwr 55 wbs
pw 7.9 wnt
d1 1.000
tof 277.9
nt 16
ct 16
alock y
gain not used

FLAGS
il n
in n
dp y

DISPLAY
sp -598.3
wp 4800.5
vs 378
sc 0
wc 240
hzmm 20.00
is 563.16
rfl 598.6
rfp 0
th 2
ins 1.000
ai cdc ph
```

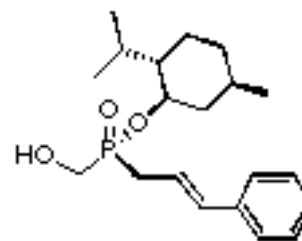

Compound (R<sub>p</sub>)-4  
<sup>1</sup>H NMR

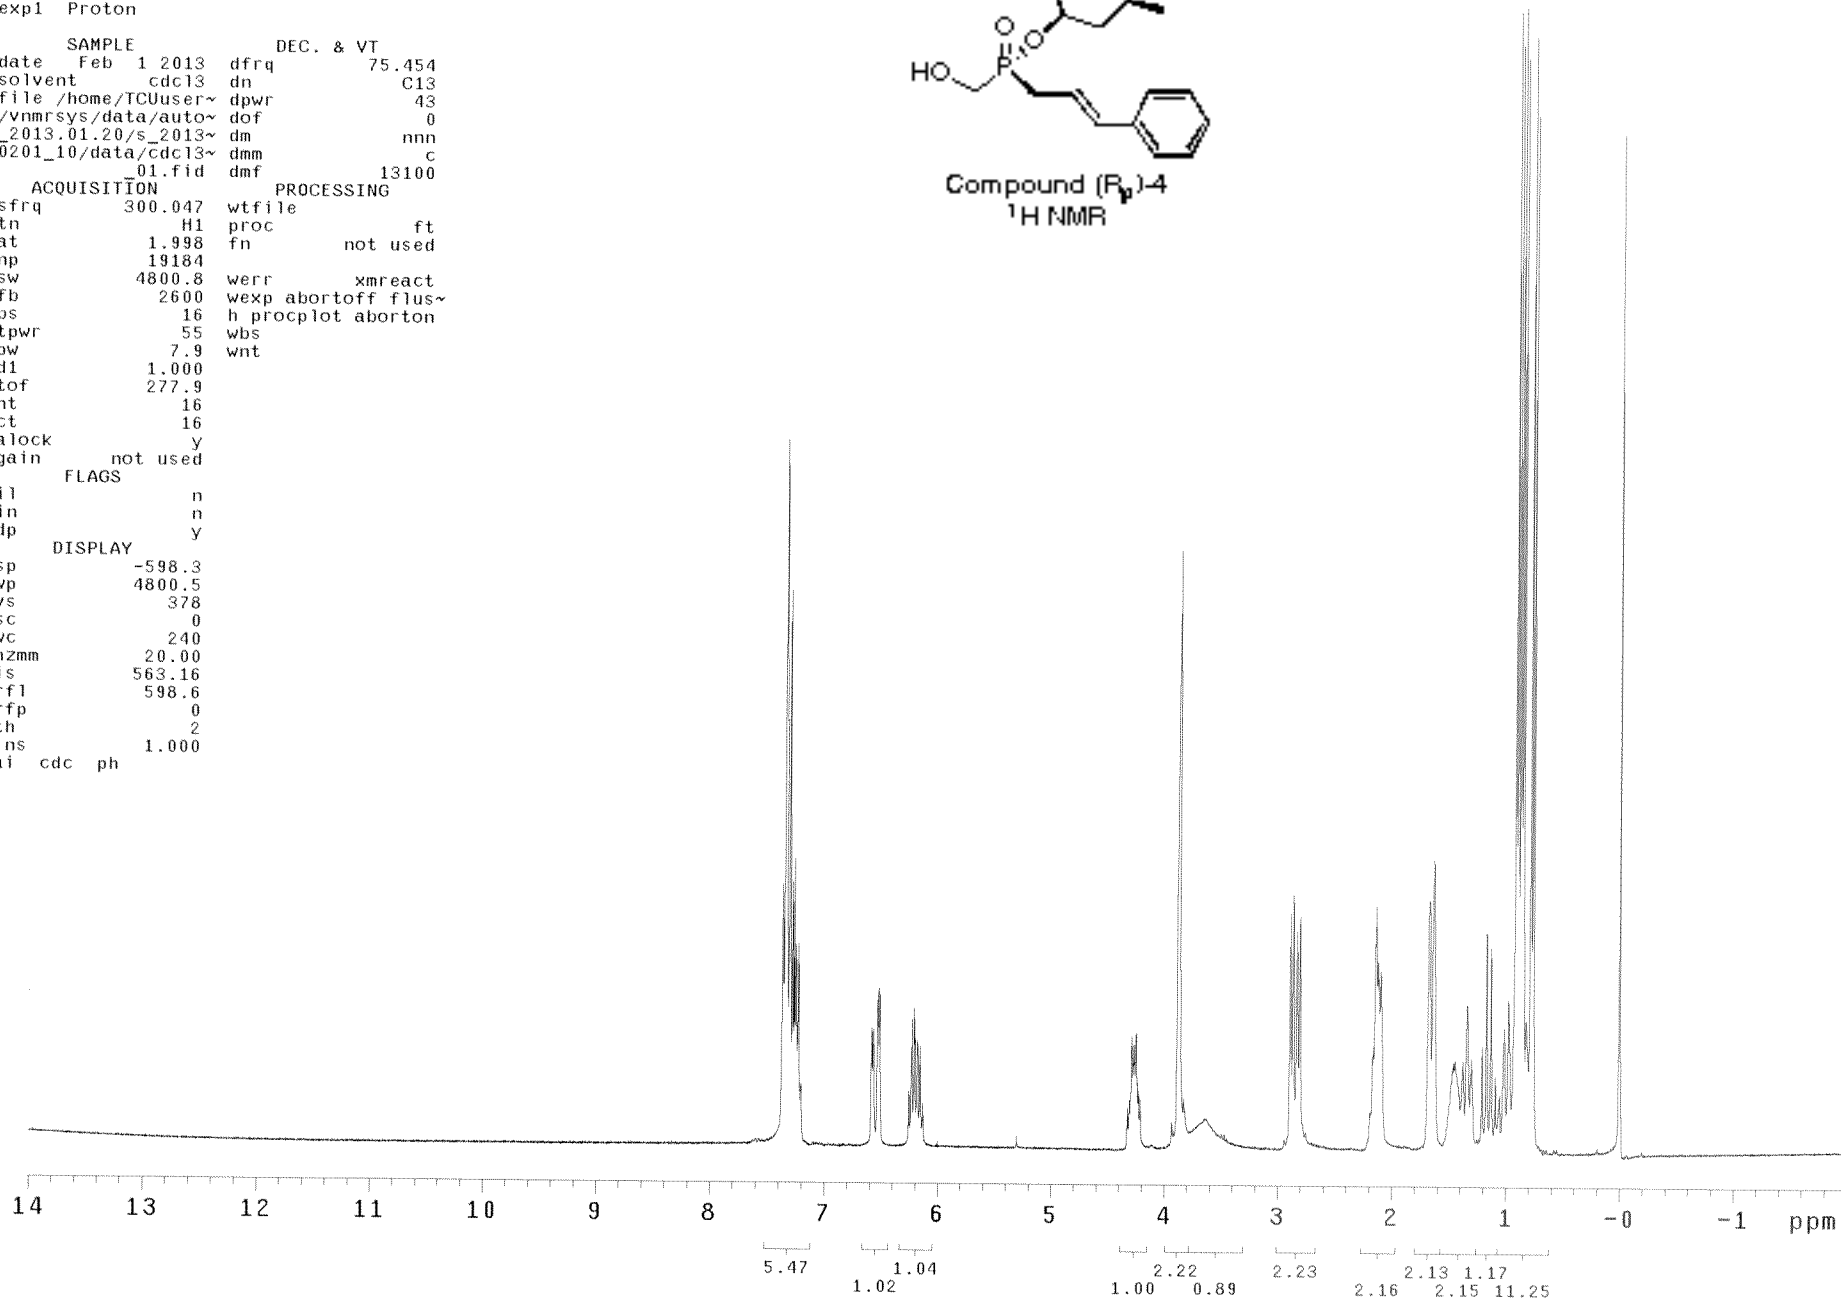

OB 900

exp1 Carbon

| SAMPLE              |                | SPECIAL    |          |
|---------------------|----------------|------------|----------|
| date                | Feb 1 2013     | temp       | not used |
| solvent             | cdcl3          | gain       | 20       |
| file                | /home/TCUuser~ | spin       | 20       |
| /vnmr               | sys/data/auto~ | hst        | 0.008    |
| _2013.01.20/s_2013~ |                | pw90       | 18.500   |
| 0201_12/data/cdc13~ |                | alfa       | 10.000   |
| _05.fid             |                | FLAGS      |          |
| ACQUISITION         |                | PROCESSING |          |
| sw                  | 18115.9        | il         | n        |
| at                  | 1.301          | in         | n        |
| np                  | 47120          | dp         | y        |
| fb                  | 10000          | hs         | nn       |
| bs                  | 64             | lb         | 0.50     |
| d1                  | 2.000          | fn         | not used |
| nt                  | 750            | DISPLAY    |          |
| ct                  | 750            | sp         | -1135.5  |
| TRANSMITTER         |                | wp         | 18115.4  |
| tn                  | C13            | rfl        | 1136.1   |
| sfrq                | 75.454         | rfp        | 0        |
| tof                 | 766.0          | rp         | 9.2      |
| tpwr                | 58             | lp         | -182.4   |
| pw                  | 9.250          | PLOT       |          |
| DECOUPLER           |                | wc         | 250      |
| dn                  | H1             | sc         | 0        |
| dof                 | 0              | vs         | 332      |
| dm                  | yyy            | th         | 6        |
| dmm                 | w              | ai         | cdc ph   |
| dpwr                | 35             |            |          |
| dmf                 | 6700           |            |          |

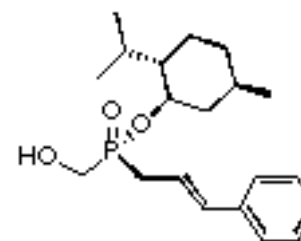

Compound (R<sub>p</sub>)-4  
<sup>13</sup>C NMR

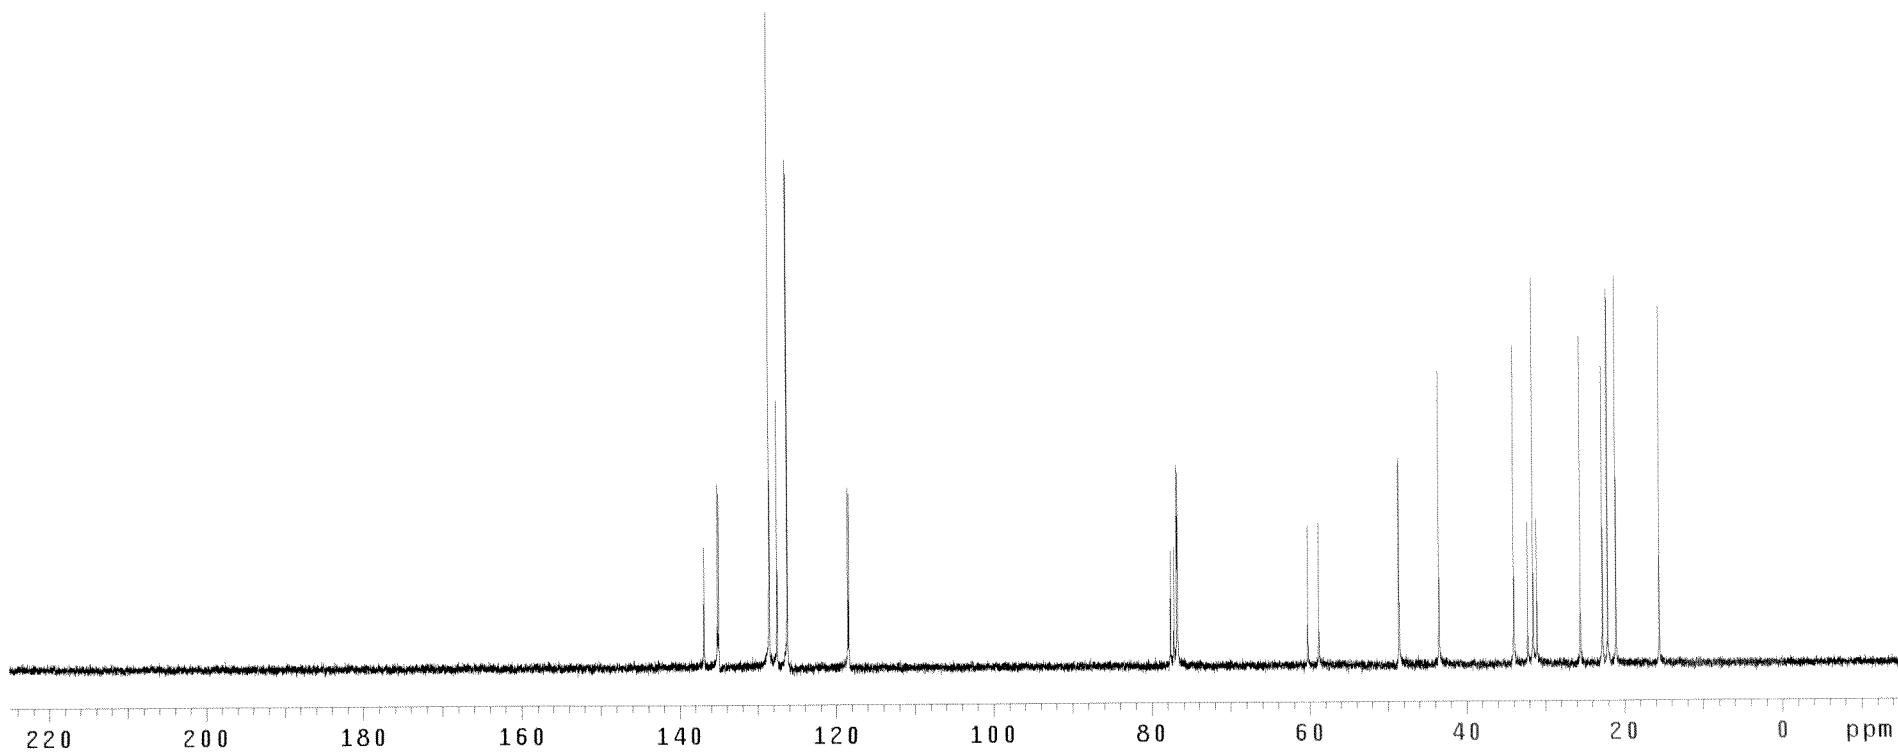

OB 876  
pad=10 run with findz0 before acquisition

exp1 Phosphorus

| SAMPLE              |                | SPECIAL    |          |
|---------------------|----------------|------------|----------|
| date                | Dec 18 2012    | temp       | not used |
| solvent             | cdc13          | gain       | 25       |
| file                | /home/TCUuser~ | spin       | 20       |
| /vnmrsys/data/auto~ |                | hst        | 0.008    |
| _2012.12.14/s_2012~ |                | pw90       | 18.300   |
| I218_04/data/Cdc13~ |                | alfa       | 10.000   |
| 01.fid              |                | FLAGS      |          |
| ACQUISITION         |                | PROCESSING |          |
| sw                  | 15797.8        | il         | n        |
| at                  | 1.600          | in         | n        |
| np                  | 50552          | dp         | y        |
| fb                  | 8800           | hs         | ny       |
| bs                  | 64             | 1b         | 1.00     |
| d1                  | 1.000          | fn         | not used |
| nt                  | 16             | DISPLAY    |          |
| ct                  | 16             | sp         | -3647.3  |
| TRANSMITTER         |                | wp         | 15797.3  |
| tn                  | P31            | rfl        | 3647.8   |
| sfrq                | 121.465        | rfp        | 0        |
| tof                 | 7421.1         | rp         | 68.9     |
| tpwr                | 55             | lp         | -113.7   |
| pw                  | 9.150          | PLOT       |          |
| DECOUPLER           |                | wc         | 250      |
| dn                  | H1             | sc         | 0        |
| dof                 | 0              | vs         | 12       |
| dm                  | yyy            | th         | 2        |
| dmm                 | w              | ai         | cdc ph   |
| dpwr                | 35             |            |          |
| dmf                 | 6700           |            |          |

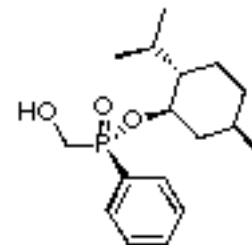

Compound (P<sub>p</sub>)-3  
<sup>31</sup>P/<sup>1</sup>H NMR decoupled

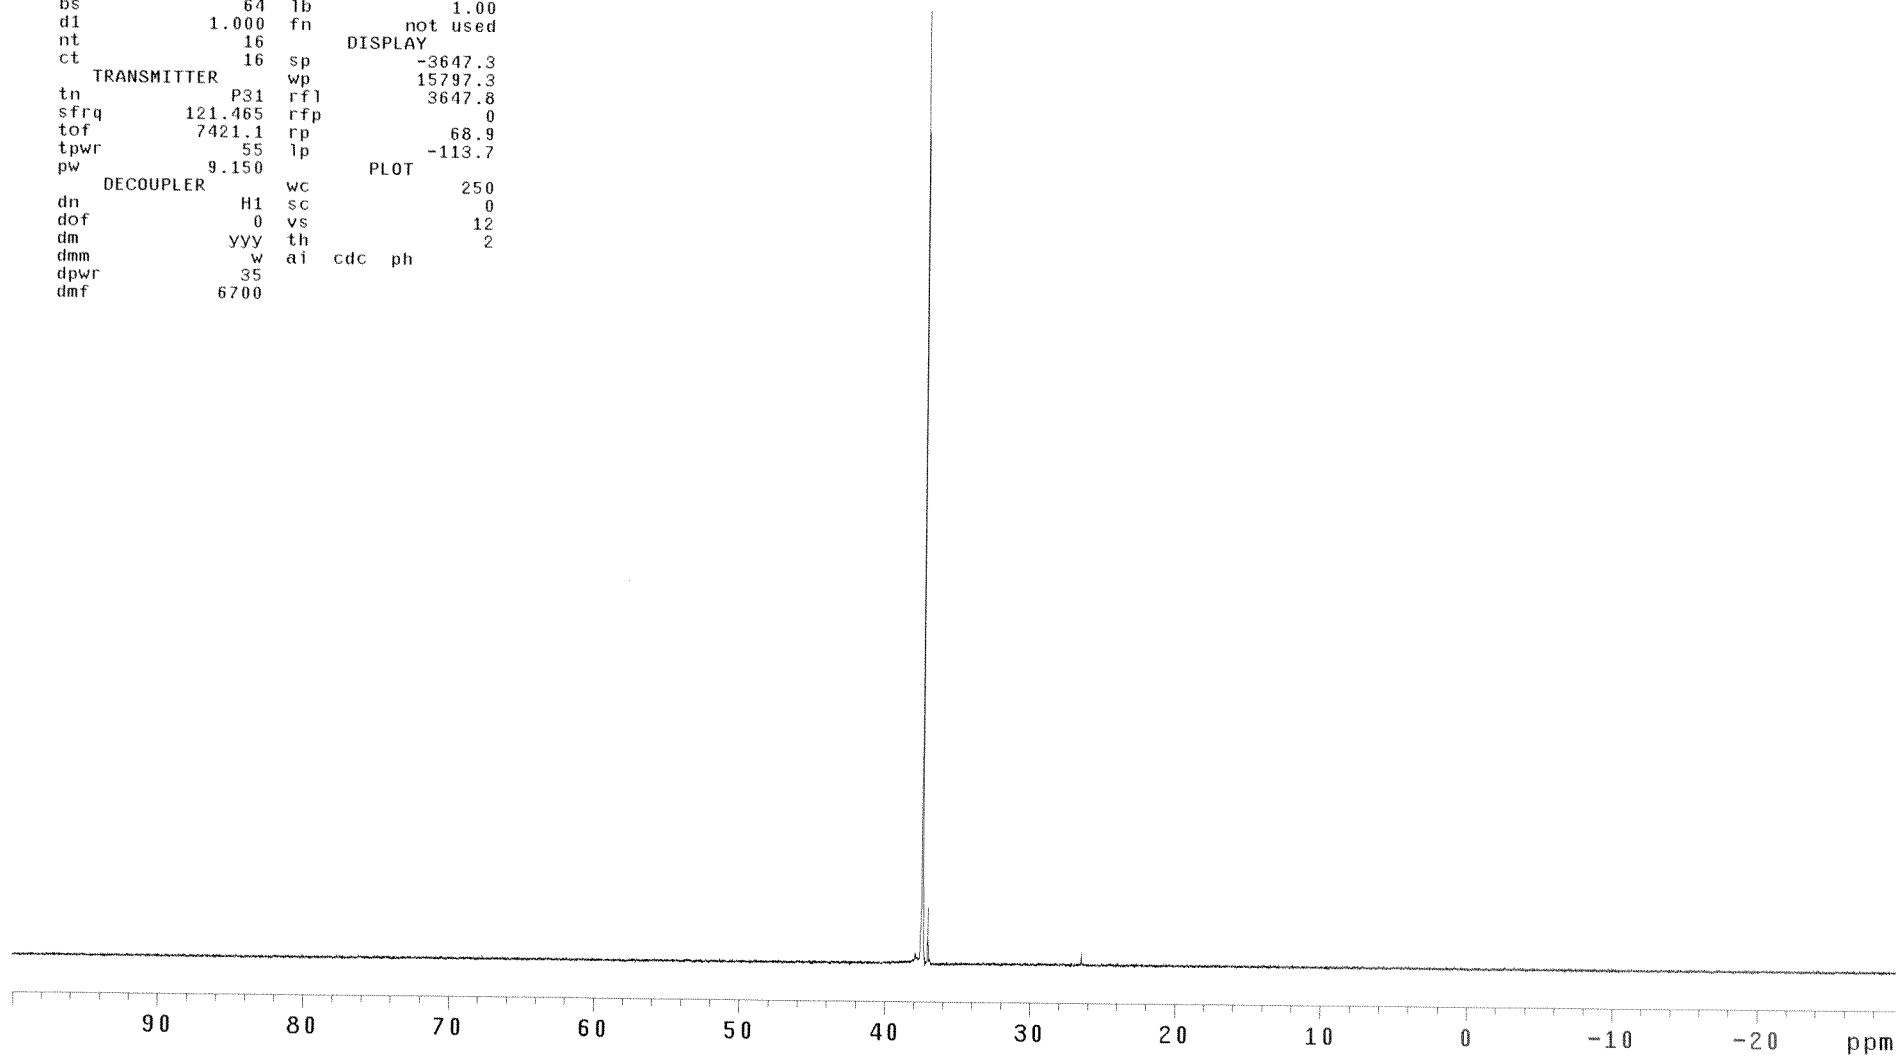

OB 876

exp1 Phosphorus

| SAMPLE              |                | SPECIAL    |          |
|---------------------|----------------|------------|----------|
| date                | Dec 18 2012    | temp       | not used |
| solvent             | cdc13          | gain       | 25       |
| file                | /home/TCUuser~ | spin       | 20       |
| /vnmrsys/data/auto~ |                | hst        | 0.008    |
| _2012.12.14/s_2012~ |                | pw90       | 18.300   |
| 1218_04/data/cdc13~ |                | alfa       | 10.000   |
| _02.fid             |                | FLAGS      |          |
| ACQUISITION         |                | PROCESSING |          |
| sw                  | 15797.8        | il         | n        |
| at                  | 1.600          | in         | n        |
| np                  | 50552          | dp         | y        |
| fb                  | 8800           | hs         | ny       |
| bs                  | 64             | PROCESSING |          |
| d1                  | 1.000          | lb         | 1.00     |
| nt                  | 16             | fn         | not used |
| ct                  | 16             | DISPLAY    |          |
| TRANSMITTER         |                | sp         | -3647.3  |
| tn                  | P31            | wp         | 15797.3  |
| sfrq                | 121.465        | rfl        | 3647.8   |
| tof                 | 7421.1         | rfp        | 0        |
| tpwr                | 55             | rp         | 50.4     |
| pw                  | 9.150          | lp         | -113.7   |
| DECOUPLER           |                | PLOT       |          |
| dn                  | H1             | wc         | 250      |
| dof                 | 0              | sc         | 0        |
| dm                  | ynn            | vs         | 58       |
| dmm                 | w              | th         | 4        |
| dpwr                | 35             | ai         | cdc ph   |
| dmf                 | 6700           |            |          |

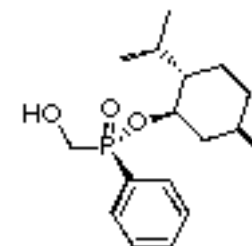

Compound (Rp)-3  
<sup>31</sup>P/<sup>1</sup>H NMR coupled

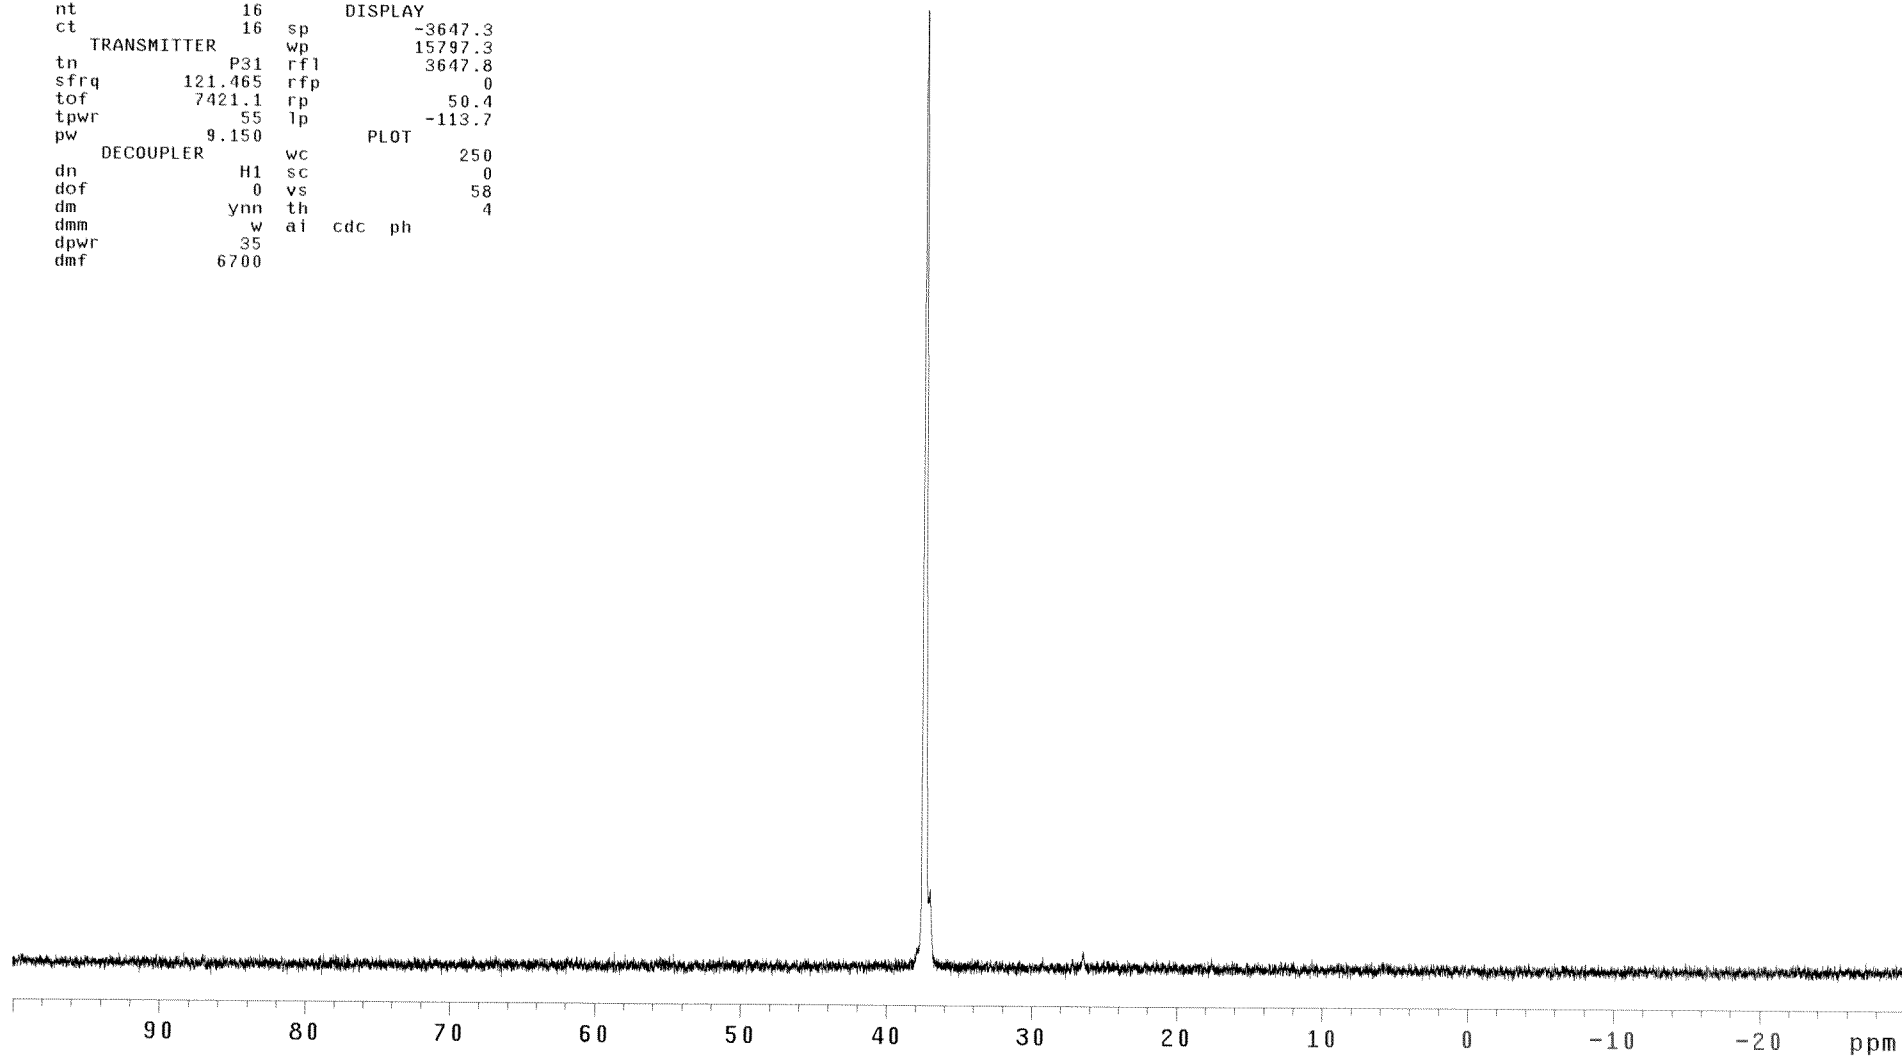

OB 876  
pad=10 run with findz0 before acquisition

exp1 Proton

| SAMPLE              |                | DEC. & VT |        |
|---------------------|----------------|-----------|--------|
| date                | Dec 18 2012    | dfrq      | 75.454 |
| solvent             | cdcl3          | dn        | C13    |
| file                | /home/TCUuser~ | dpwr      | 43     |
| /vnmrsys/data/auto~ |                | dof       | 0      |
| _2012.12.14/s_2012~ |                | dm        | nnn    |
| I218_02/data/cdc13~ |                | dmm       | c      |
| _01.fid             |                | dmf       | 13100  |

| ACQUISITION |          | PROCESSING |                 |
|-------------|----------|------------|-----------------|
| sfrq        | 300.047  | wtfile     |                 |
| tn          | H1       | proc       | ft              |
| at          | 1.998    | fn         | not used        |
| np          | 19184    |            |                 |
| sw          | 4800.8   | werr       | xmreact         |
| fb          | 2600     | wexp       | abortoff flus~  |
| bs          | 16       | h          | proplot aborton |
| tpwr        | 55       | wbs        |                 |
| pw          | 7.9      | wnt        |                 |
| d1          | 1.000    |            |                 |
| tof         | 277.9    |            |                 |
| nt          | 16       |            |                 |
| ct          | 16       |            |                 |
| alock       | y        |            |                 |
| gain        | not used |            |                 |

| FLAGS |   |
|-------|---|
| il    | n |
| in    | n |
| dp    | y |

| DISPLAY |        |
|---------|--------|
| sp      | -593.9 |
| wp      | 4800.5 |
| vs      | 253    |
| sc      | 0      |
| wc      | 240    |
| hzmm    | 20.00  |
| is      | 564.36 |
| rfl     | 594.2  |
| rfp     | 0      |
| th      | 4      |
| ins     | 3.000  |
| ai      | cdc ph |

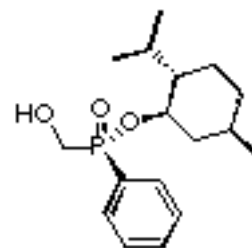

Compound (R<sub>p</sub>)-3  
<sup>1</sup>H NMR

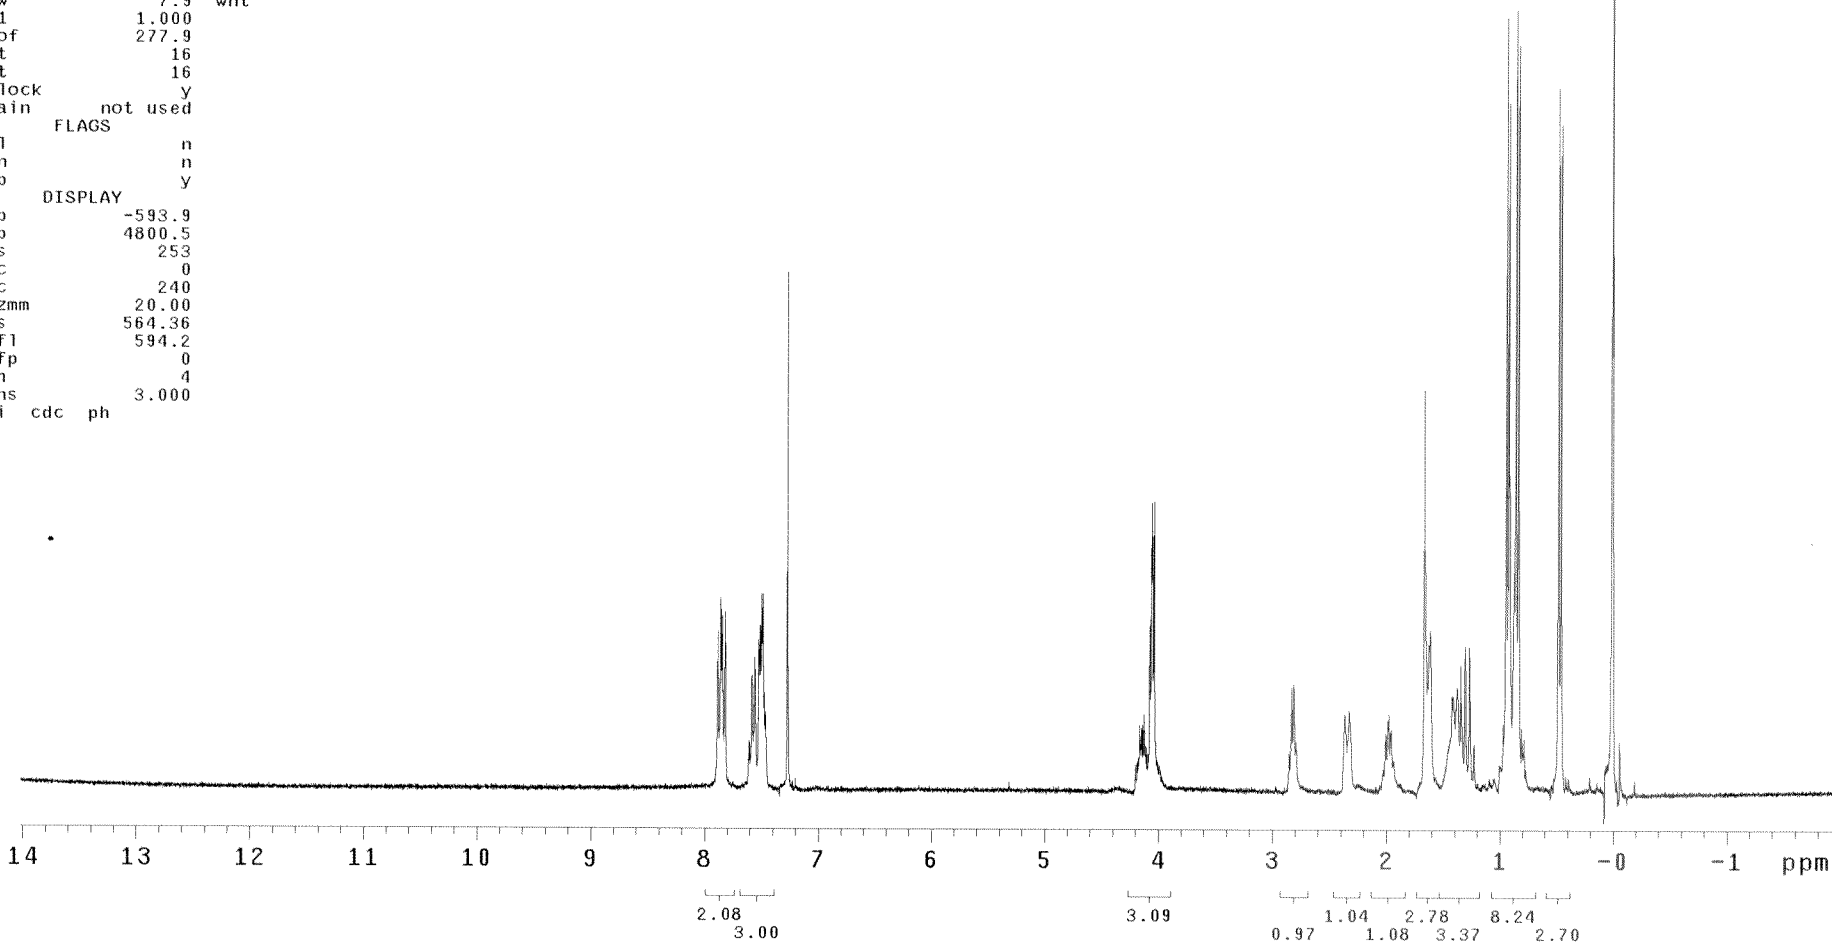

OB 876

exp1 Carbon

| SAMPLE              |               | SPECIAL    |          |
|---------------------|---------------|------------|----------|
| date                | Dec 18 2012   | temp       | not used |
| solvent             | cdcl3         | gain       | 20       |
| file                | /home/TCUser~ | spin       | 20       |
| /vnmrsw/data/auto~  |               | hst        | 0.008    |
| _2012.12.14/s_2012~ |               | pw90       | 18.500   |
| I218_04/data/cdc13~ |               | alfa       | 10.000   |
| _03.fid             |               | FLAGS      |          |
| ACQUISITION         |               | PROCESSING |          |
| sw                  | 18115.9       | il         | n        |
| at                  | 1.301         | in         | n        |
| np                  | 47120         | dp         | y        |
| fb                  | 10000         | hs         | nn       |
| bs                  | 64            | lb         | 0.50     |
| d1                  | 2.000         | fn         | not used |
| nt                  | 800           | DISPLAY    |          |
| ct                  | 800           | sp         | -1135.5  |
| TRANSMITTER         |               | wp         | 18115.4  |
| tn                  | C13           | rfl        | 1136.1   |
| sfrq                | 75.454        | rfp        | 0        |
| tof                 | 766.0         | rp         | 43.1     |
| tpwr                | 58            | lp         | -199.8   |
| pw                  | 9.250         | PLOT       |          |
| DECOUPLER           |               | wc         | 250      |
| dn                  | H1            | sc         | 0        |
| dof                 | 0             | vs         | 483      |
| dm                  | yyy           | th         | 7        |
| dmm                 | w             | ai         | cdc ph   |
| dpwr                | 35            |            |          |
| dmf                 | 6700          |            |          |

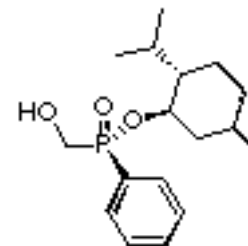

Compound (Rp)-8  
13C NMR

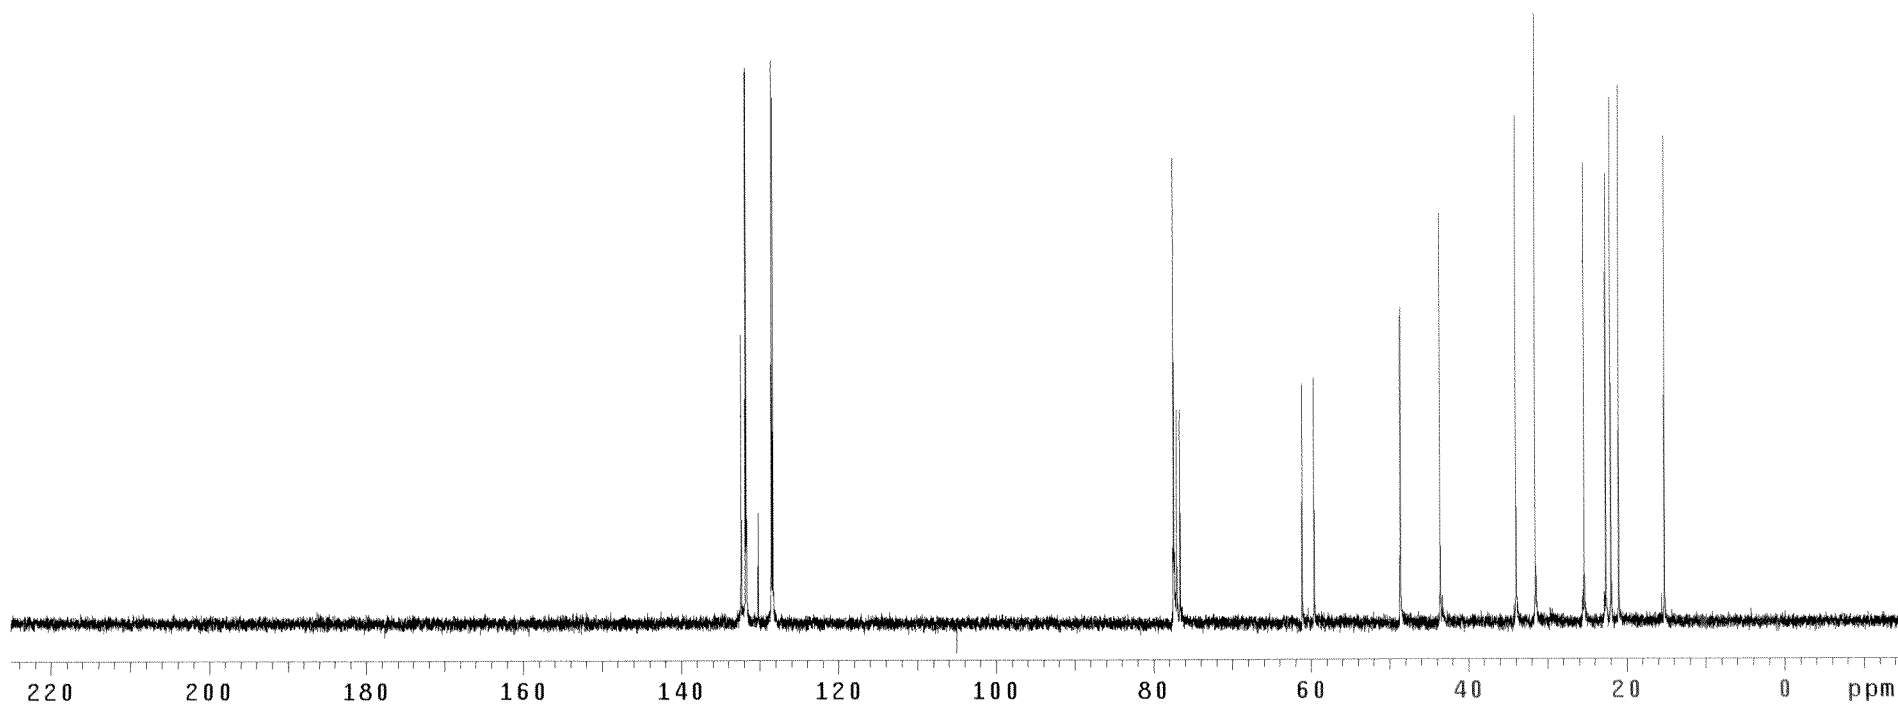

OB 882  
pad=10 run with findz0 before acquisition

exp1 Phosphorus

| SAMPLE              |                | SPECIAL    |          |
|---------------------|----------------|------------|----------|
| date                | Dec 18 2012    | temp       | not used |
| solvent             | cdc13          | gain       | 20       |
| file                | /home/TCUuser~ | spin       | 20       |
| /vnmrsys/data/auto~ |                | hst        | 0.008    |
| _2012.12.14/s_2012~ |                | pw90       | 18.300   |
| i218_31/data/cdc13~ |                | alfa       | 10.000   |
| _02.fid             |                | FLAGS      |          |
| ACQUISITION         |                | PROCESSING |          |
| sw                  | 15797.8        | il         | n        |
| at                  | 1.600          | in         | n        |
| np                  | 50552          | dp         | y        |
| fb                  | 8800           | hs         | ny       |
| bs                  | 64             | 1b         | 1.00     |
| d1                  | 1.000          | fn         | not used |
| nt                  | 16             | DISPLAY    |          |
| ct                  | 16             | sp         | -3647.3  |
| TRANSMITTER         |                | wp         | 15797.3  |
| tn                  | P31            | rfl        | 3647.8   |
| sfrq                | 121.465        | rfl        | 0        |
| tof                 | 7421.1         | rfp        | 29.2     |
| tpwr                | 55             | lp         | -113.7   |
| pw                  | 9.150          | PLOT       |          |
| DECOUPLER           |                | wc         | 250      |
| dn                  | H1             | sc         | 0        |
| dof                 | 0              | vs         | 7        |
| dm                  | YYY            | th         | 2        |
| dmm                 | w              | ai         | cdc ph   |
| dpwr                | 35             |            |          |
| dmf                 | 6700           |            |          |

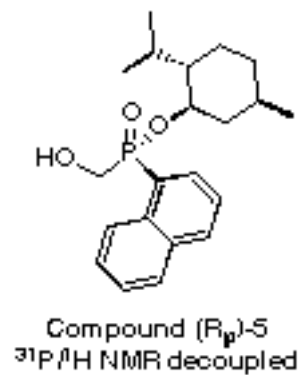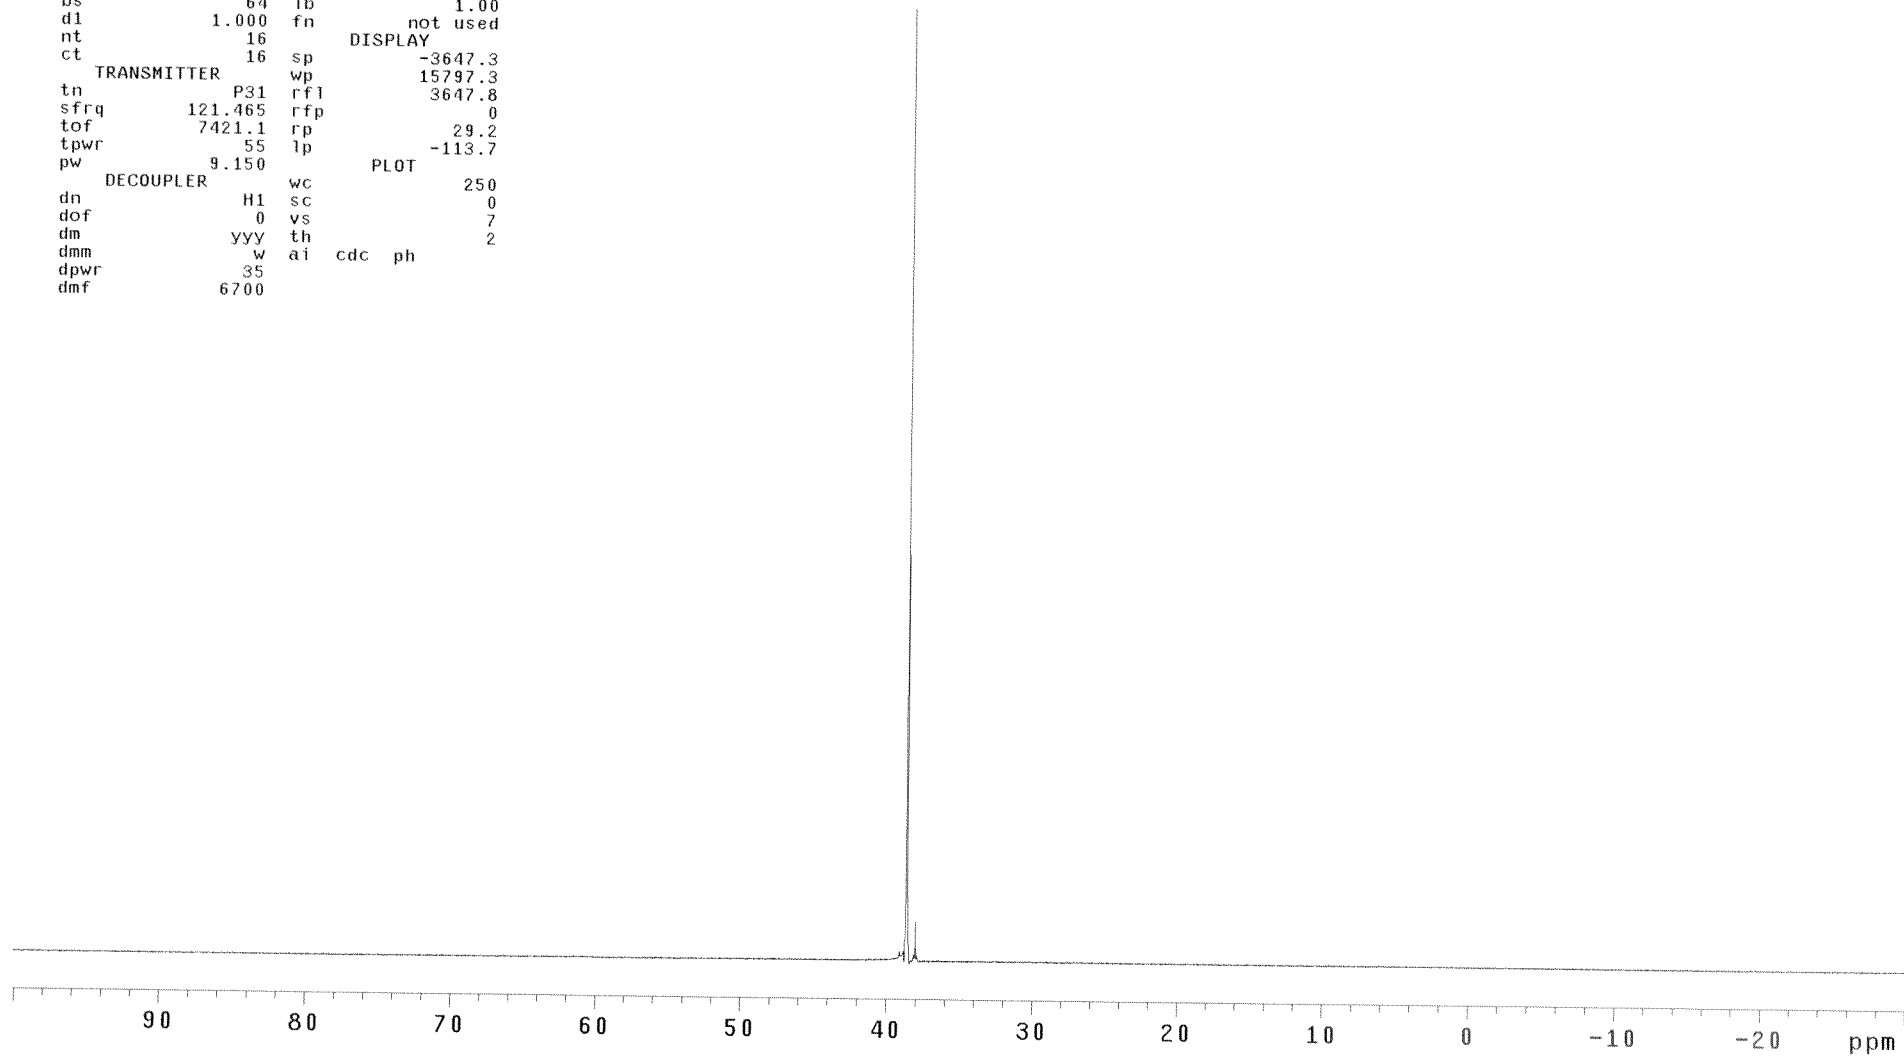



0B 882

exp1 Phosphorus

| SAMPLE              |                | SPECIAL    |          |
|---------------------|----------------|------------|----------|
| date                | Dec 18 2012    | temp       | not used |
| solvent             | cdc13          | gain       | 20       |
| file                | /home/TCUuser~ | spin       | 20       |
| /vnmrsys/data/auto~ |                | hst        | 0.008    |
| _2012.12.14/s_2012~ |                | pw90       | 18.300   |
| 1218_31/data/cdc13~ |                | alfa       | 10.000   |
| _04.fid             |                | FLAGS      |          |
| ACQUISITION         |                | PROCESSING |          |
| sw                  | 15797.8        | il         | n        |
| at                  | 1.600          | in         | n        |
| np                  | 50552          | dp         | y        |
| fb                  | 8800           | hs         | ny       |
| bs                  | 64             | lb         | 1.00     |
| d1                  | 1.000          | fn         | not used |
| nt                  | 16             | DISPLAY    |          |
| ct                  | 16             | sp         | -3647.3  |
| TRANSMITTER         |                | wp         | 15797.3  |
| tn                  | P31            | rfl        | 3647.8   |
| sfrq                | 121.465        | rfp        | 0        |
| tof                 | 7421.1         | rp         | 31.8     |
| tpwr                | 55             | lp         | -113.7   |
| pw                  | 9.150          | PLOT       |          |
| DECOUPLER           |                | wc         | 250      |
| dn                  | H1             | sc         | 0        |
| dof                 | 0              | vs         | 26       |
| dm                  | ynn            | th         | 2        |
| dmm                 | w              | ai         | cdc ph   |
| dpwr                | 35             |            |          |
| dmf                 | 6700           |            |          |

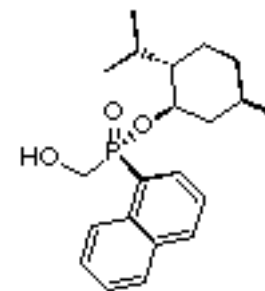

Compound (Rp)-5  
<sup>31</sup>P/<sup>1</sup>H NMR coupled

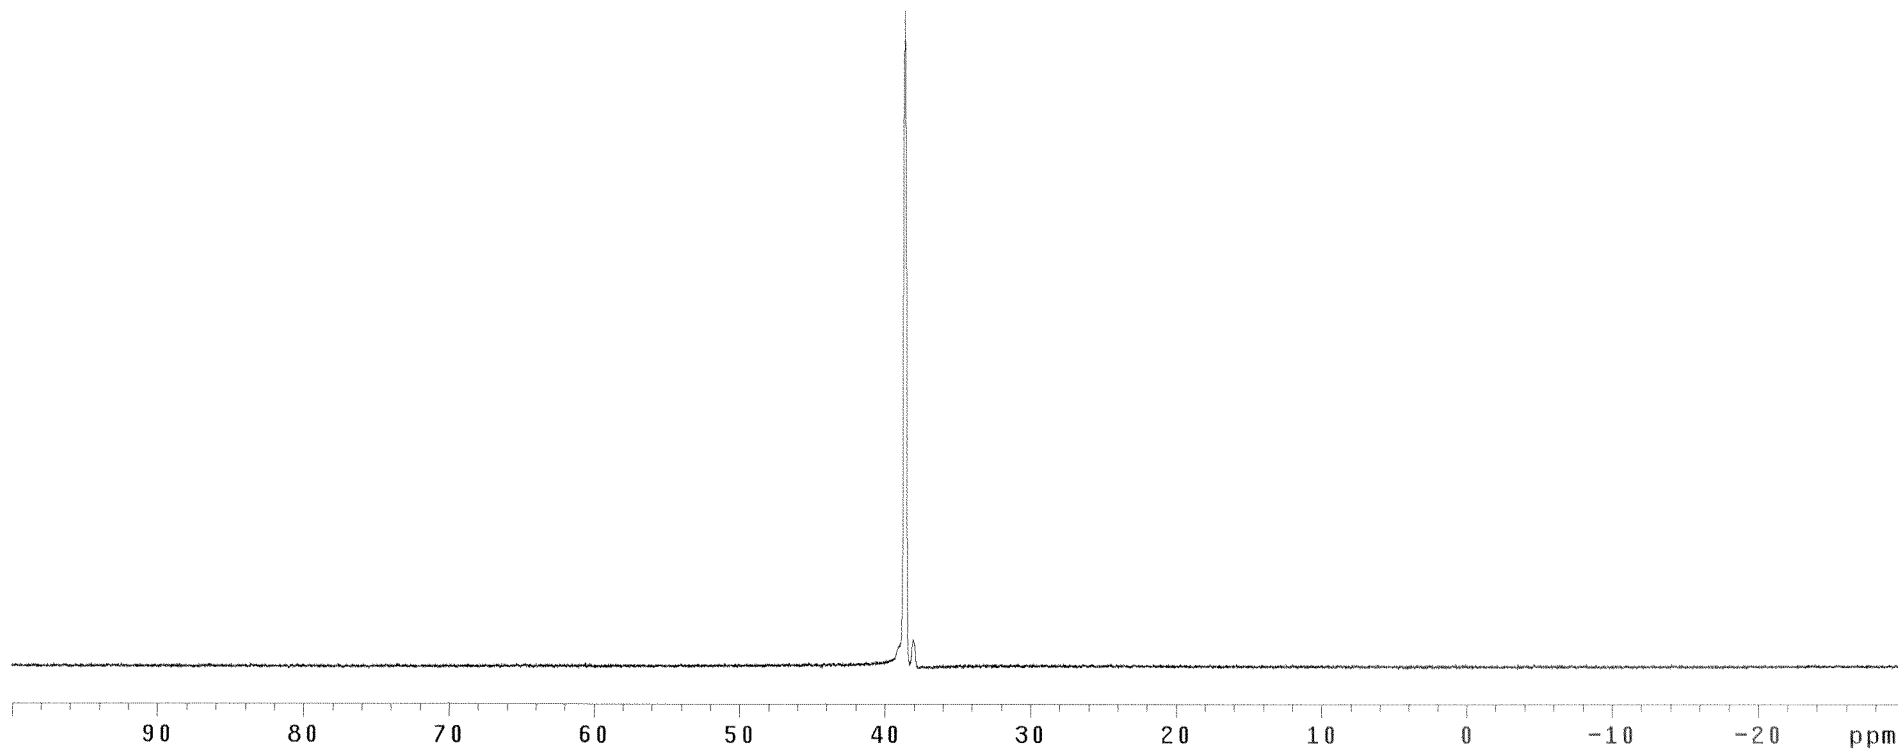

OB 882  
pad=10 run with findz0 before acquisition

expl Proton

```
SAMPLE          DEC. & VT
date   Dec 18 2012  dfrq      75.454
solvent  cdcl3      dn        C13
file /home/TCUuser~ dpwr      43
/vnmrsys/data/auto~ dof       0
_2012.12.14/s_2012~ dm        nnn
1218_28/data/cdc13~ dmm      c
_01.fid      dmf      13100

ACQUISITION      PROCESSING
sfrq      300.047  wtfile
tn         H1      proc      ft
at         1.998  fn        not used
np         19184
sw         4800.8  werr      xmreact
fb         2600   wexp abortoff flus~
bs         16     h procplot aborton
tpwr       55     wbs
pw         7.9    wnt
d1         1.000
tof        277.9
nt         16
ct         16
alock      y
gain       not used

FLAGS
il         n
in         n
dp         y

DISPLAY
sp         -594.2
wp         4800.5
vs         260
sc         0
wc         240
hzmm       20.00
is         462.37
rfl        594.5
rfp        0
th         3
ins        3.000
ai cdc ph
```

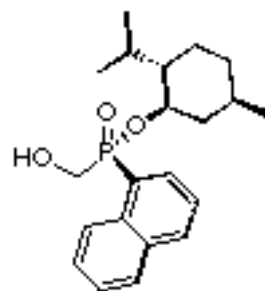

Compound (R<sub>p</sub>)-5  
<sup>1</sup>H NMR

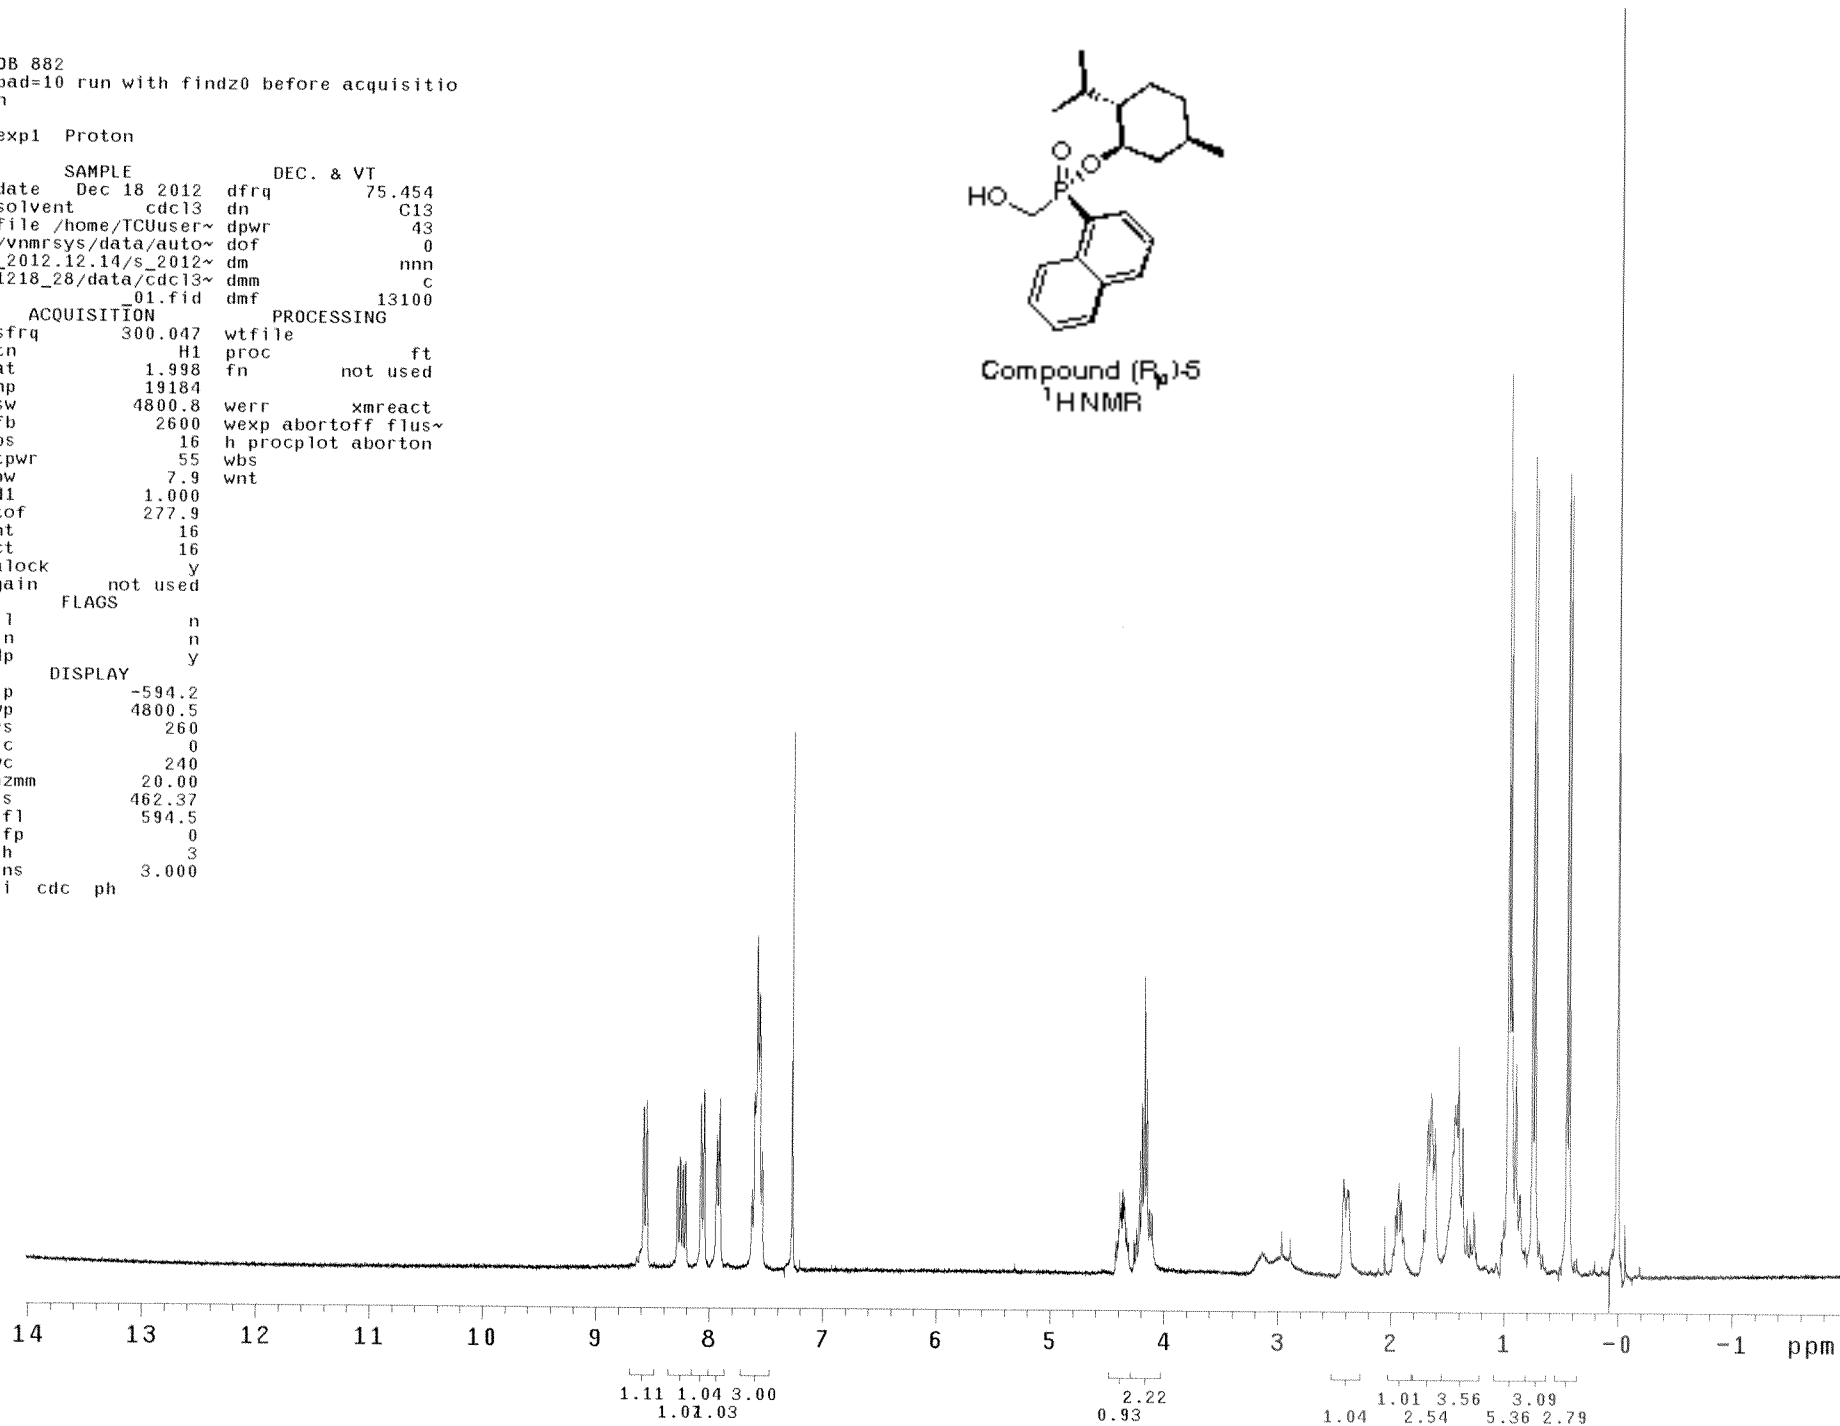

OB 882

exp1 Carbon

```
SAMPLE          SPECIAL
date   Dec 18 2012  temp   not used
solvent cdc13      gain    20
file   /home/TCUuser~ spin    20
/vnmrsvs/data/auto~ hst     0.008
_2012.12.14/s_2012~ pw90   18.500
1218_31/data/cdc13~ alfa   10.000
_05.fid          FLAGS
ACQUISITION     il      n
sw             18115.9 in    n
at             1.301 dp    y
np             47120 hs    nn
fb            10000
bs             64 lb     0.50
d1             2.000 fn   not used
nt             1000
ct             1000 sp   -1135.5
TRANSMITTER     wp     18115.4
tn             C13    rfl   1136.1
sfrq          75.454 rfp    0
tof           766.0 rp    -7.6
tpwr          58 lp    -201.1
pw           9.250
DECOUPLER       wc     250
dn             H1    sc     0
dof            0 vs    272
dm            yyy th     6
dmm           w ai   cdc ph
dpwr          35
dmf           6700
```

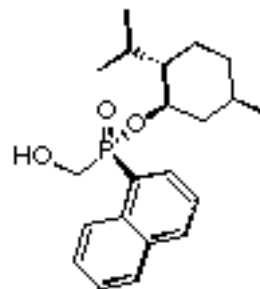

Compound (Rp)-5  
<sup>13</sup>C NMR

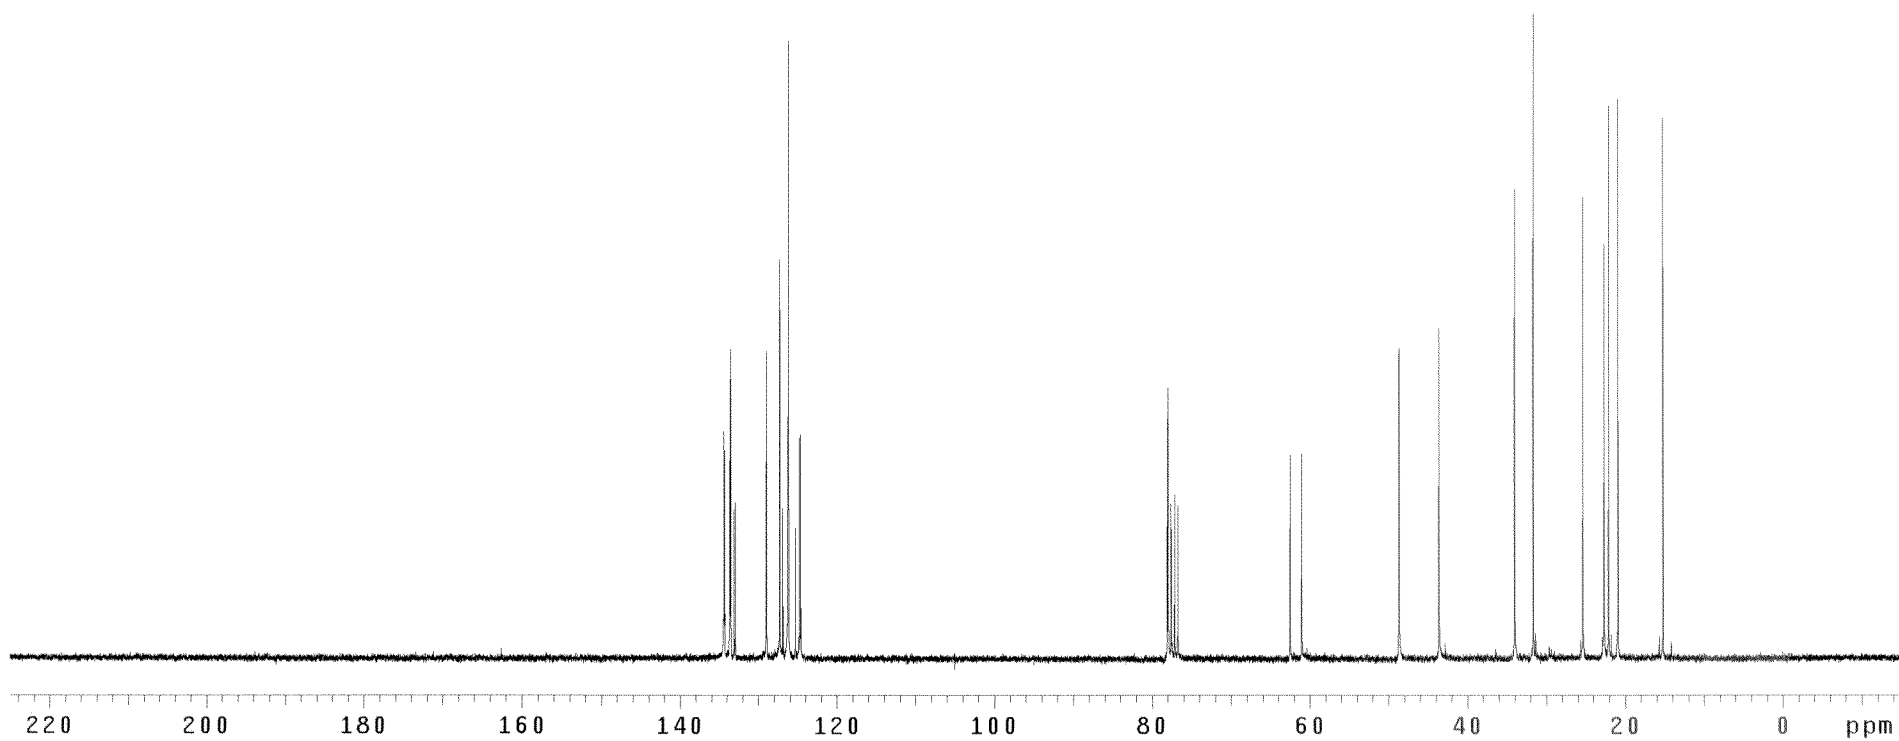

OB 883  
pad=10 run with findz0 before acquisition

exp1 Phosphorus

| SAMPLE              |                | SPECIAL    |          |
|---------------------|----------------|------------|----------|
| date                | Dec 19 2012    | temp       | not used |
| solvent             | cdcl3          | gain       | 25       |
| file                | /home/TCUuser~ | spin       | 20       |
| /vnmrsys/data/auto~ |                | hst        | 0.008    |
| _2012.12.14/s_2012~ |                | pw90       | 18.300   |
| I219_02/data/cdc13~ |                | alfa       | 10.000   |
| _01.fid             |                | FLAGS      |          |
| ACQUISITION         |                | PROCESSING |          |
| sw                  | 15797.8        | il         | n        |
| at                  | 1.600          | in         | n        |
| np                  | 50552          | dp         | y        |
| fb                  | 8800           | hs         | ny       |
| bs                  | 64             | lb         | 1.00     |
| d1                  | 1.000          | fn         | not used |
| nt                  | 16             | DISPLAY    |          |
| ct                  | 16             | sp         | -3647.3  |
| TRANSMITTER         |                | wp         | 15797.3  |
| tn                  | P31            | rfl        | 3647.8   |
| sfrq                | 121.465        | rfl        | 0        |
| tof                 | 7421.1         | rfp        | 52.2     |
| tpwr                | 55             | lp         | -113.7   |
| pw                  | 9.150          | PLOT       |          |
| DECOUPLER           |                | wc         | 250      |
| dn                  | H1             | sc         | 0        |
| dof                 | 0              | vs         | 10       |
| dm                  | yyy            | th         | 5        |
| dmm                 | w              | ai         | cdc ph   |
| dpwr                | 35             |            |          |
| dmf                 | 6700           |            |          |

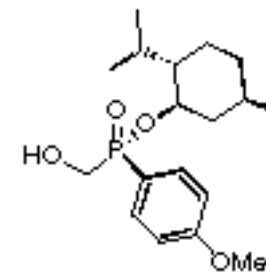

Compound (R<sub>p</sub>)-6  
<sup>31</sup>P/<sup>1</sup>H NMR decoupled

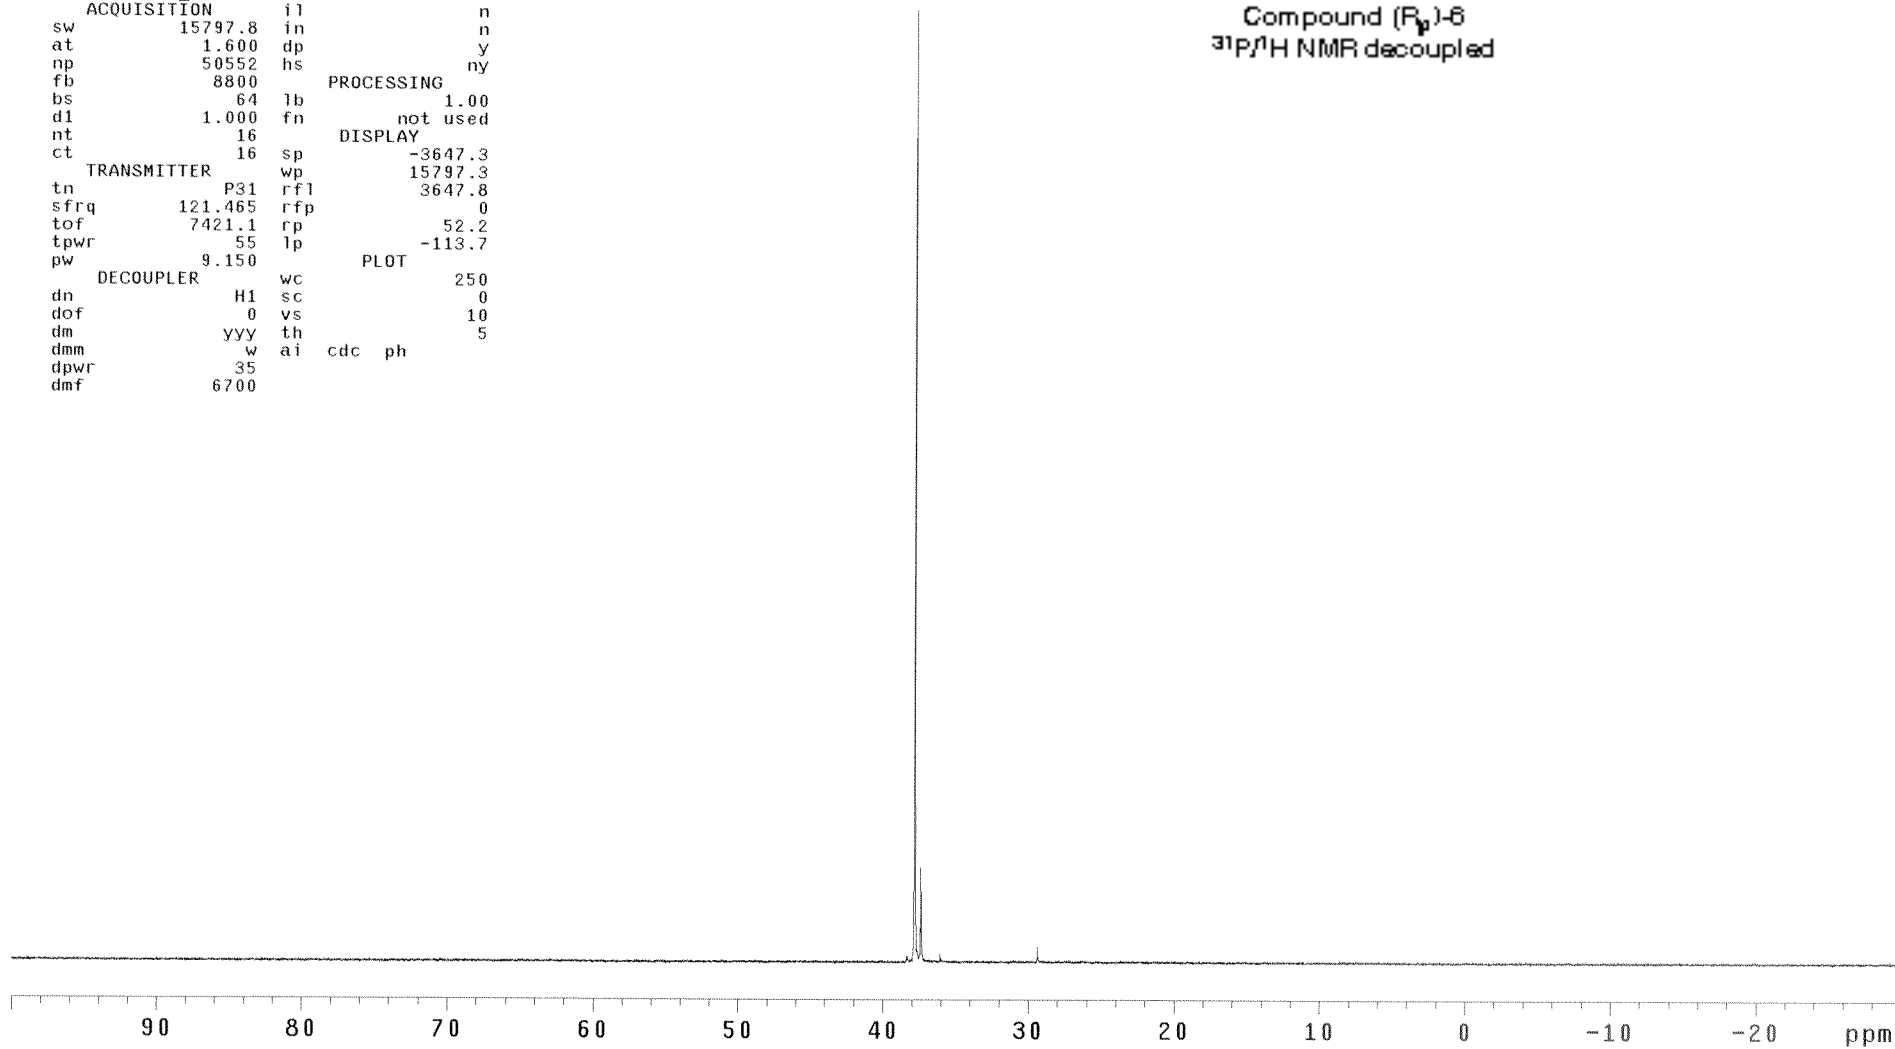

OB 883

exp1 Phosphorus

| SAMPLE              |                | SPECIAL    |          |
|---------------------|----------------|------------|----------|
| date                | Dec 19 2012    | temp       | not used |
| solvent             | cdcl3          | gain       | 25       |
| file                | /home/TCUuser~ | spin       | 20       |
| /vnmrsys/data/auto~ |                | hst        | 0.008    |
| _2012.12.14/s_2012~ |                | pw90       | 18.300   |
| 1219_02/data/cdc13~ |                | aifa       | 10.000   |
| _02.fid             |                | FLAGS      |          |
| ACQUISITION         |                | PROCESSING |          |
| sw                  | 15797.8        | il         | n        |
| at                  | 1.600          | in         | n        |
| np                  | 50552          | dp         | y        |
| fb                  | 8800           | hs         | ny       |
| bs                  | 64             | lb         | 1.00     |
| d1                  | 1.000          | fn         | not used |
| nt                  | 16             | DISPLAY    |          |
| ct                  | 16             | sp         | -3647.3  |
| tn                  | P31            | wp         | 15797.3  |
| sfrq                | 121.465        | rfl        | 3647.8   |
| tof                 | 7421.1         | rfp        | 0        |
| tpwr                | 55             | rp         | 70.0     |
| pw                  | 9.150          | lp         | -113.7   |
| DECOUPLER           |                | PLOT       |          |
| dn                  | H1             | wc         | 250      |
| dof                 | 0              | sc         | 0        |
| dm                  | ynn            | vs         | 59       |
| dmm                 | w              | th         | 4        |
| dpwr                | 35             | ai         | cdc ph   |
| dmf                 | 6700           |            |          |

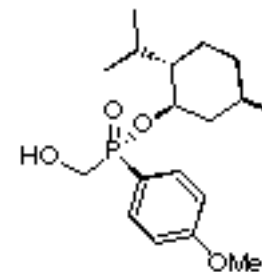

Compound (P<sub>p</sub>)-6  
<sup>31</sup>P/<sup>1</sup>H NMR coupled

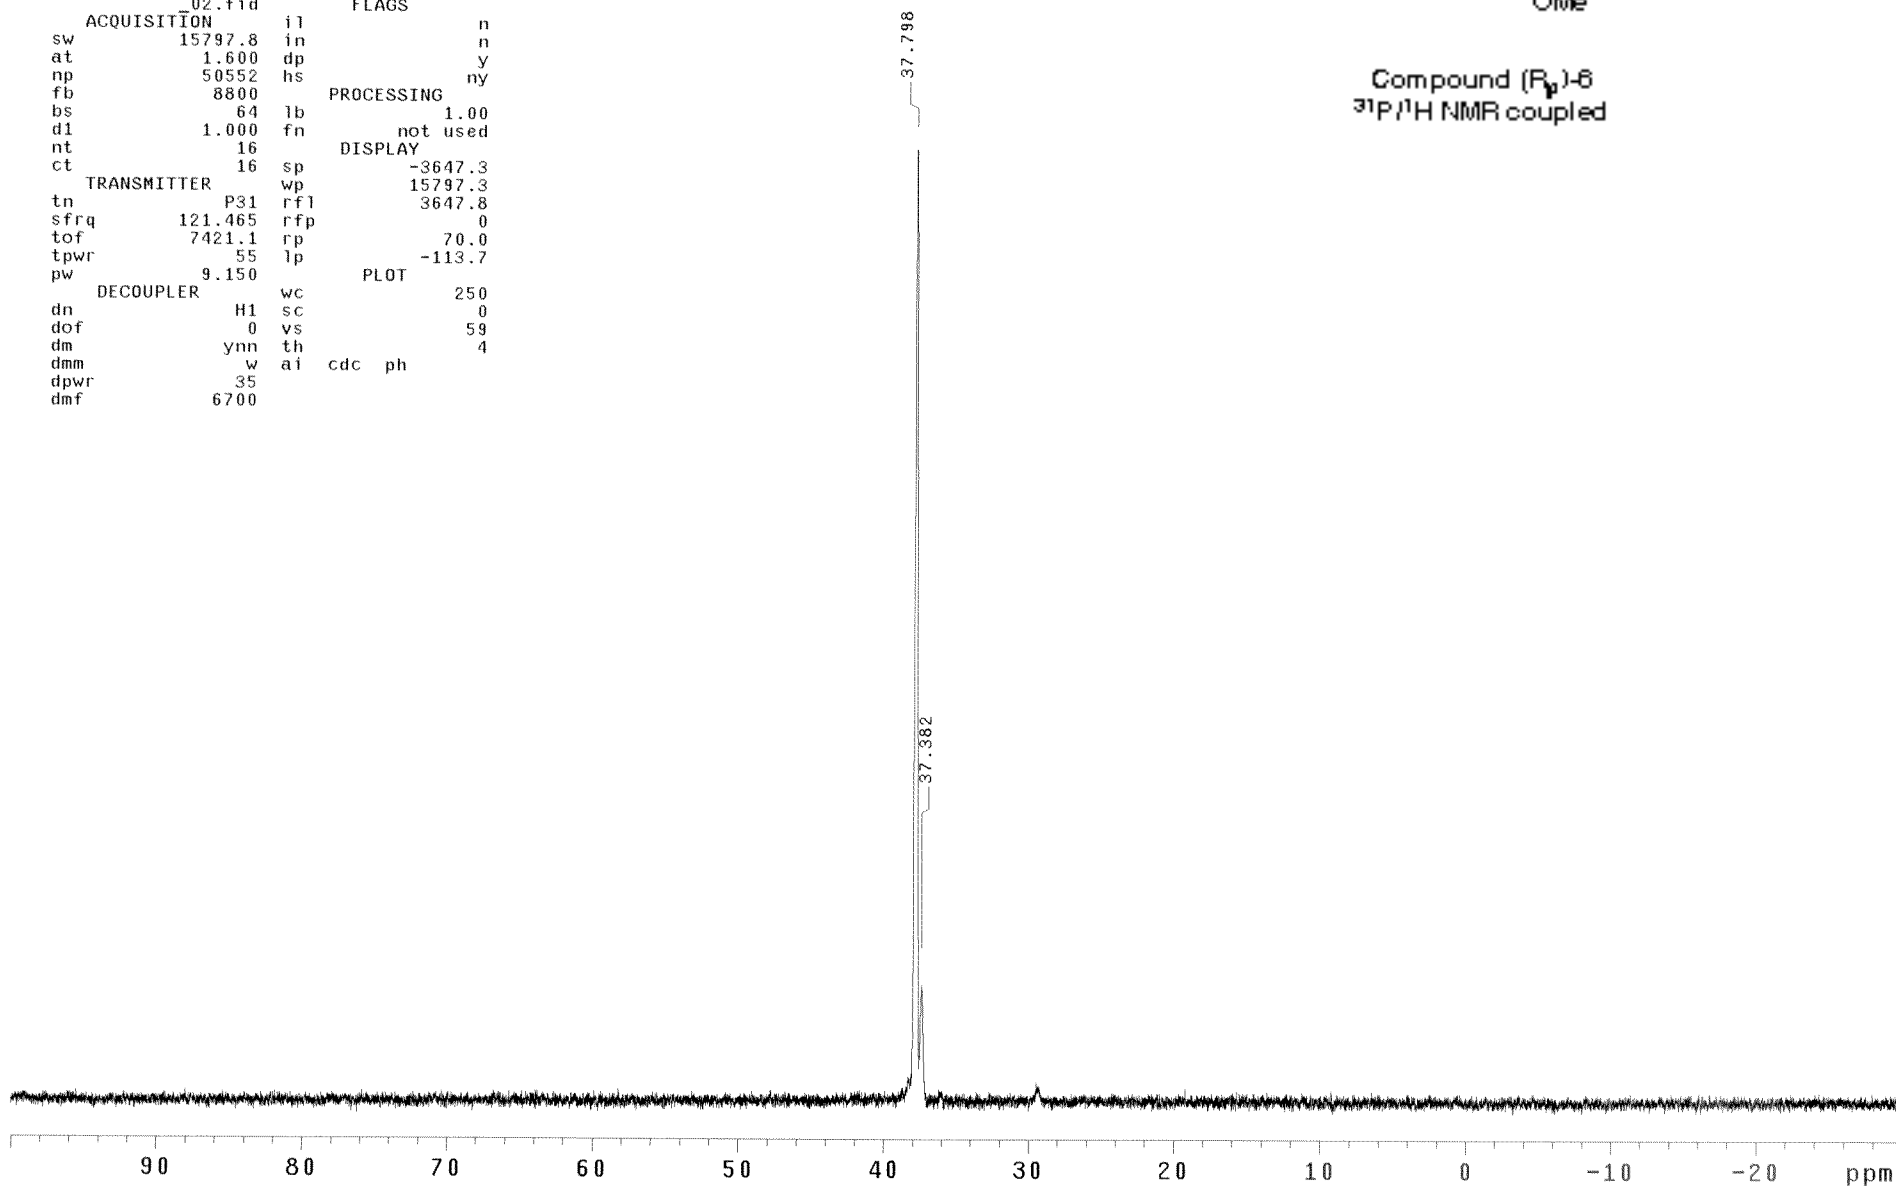

OB 883  
pad=10 run with findz0 before acquisition

expi Proton

SAMPLE DEC. & VT  
date Dec 19 2012 dfrq 75.454  
solvent cdcl3 dn C13  
file /home/TCUuser~ dpwr 43  
/vnmrsys/data/aut~ dof 0  
\_2012.12.14/s\_2012~ dm nnn  
1219\_01/data/cdcl3~ dmm c  
01.fid dmf 13100

ACQUISITION PROCESSING  
sfrq 300.047 wtfile  
tn H1 proc ft  
at 1.998 fn not used  
np 19184  
sw 4800.8 werr xmreact  
fb 2600 wexp abortoff flus~  
bs 16 h procplot aborton  
tpwr 55 wbs  
pw 7.9 wnt  
d1 1.000  
tof 277.9  
nt 16  
ct 16  
alock y  
gain not used

FLAGS  
il n  
in n  
dp y

DISPLAY  
sp -592.5  
wp 4800.5  
vs 97  
sc 0  
wc 240  
hzmm 20.00  
is 341.07  
rfl 592.8  
rfp 0  
th 3  
ins 2.000  
ai cdc ph

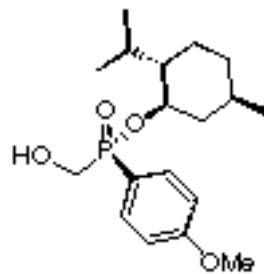

Compound (Rp)-8  
<sup>1</sup>H NMR

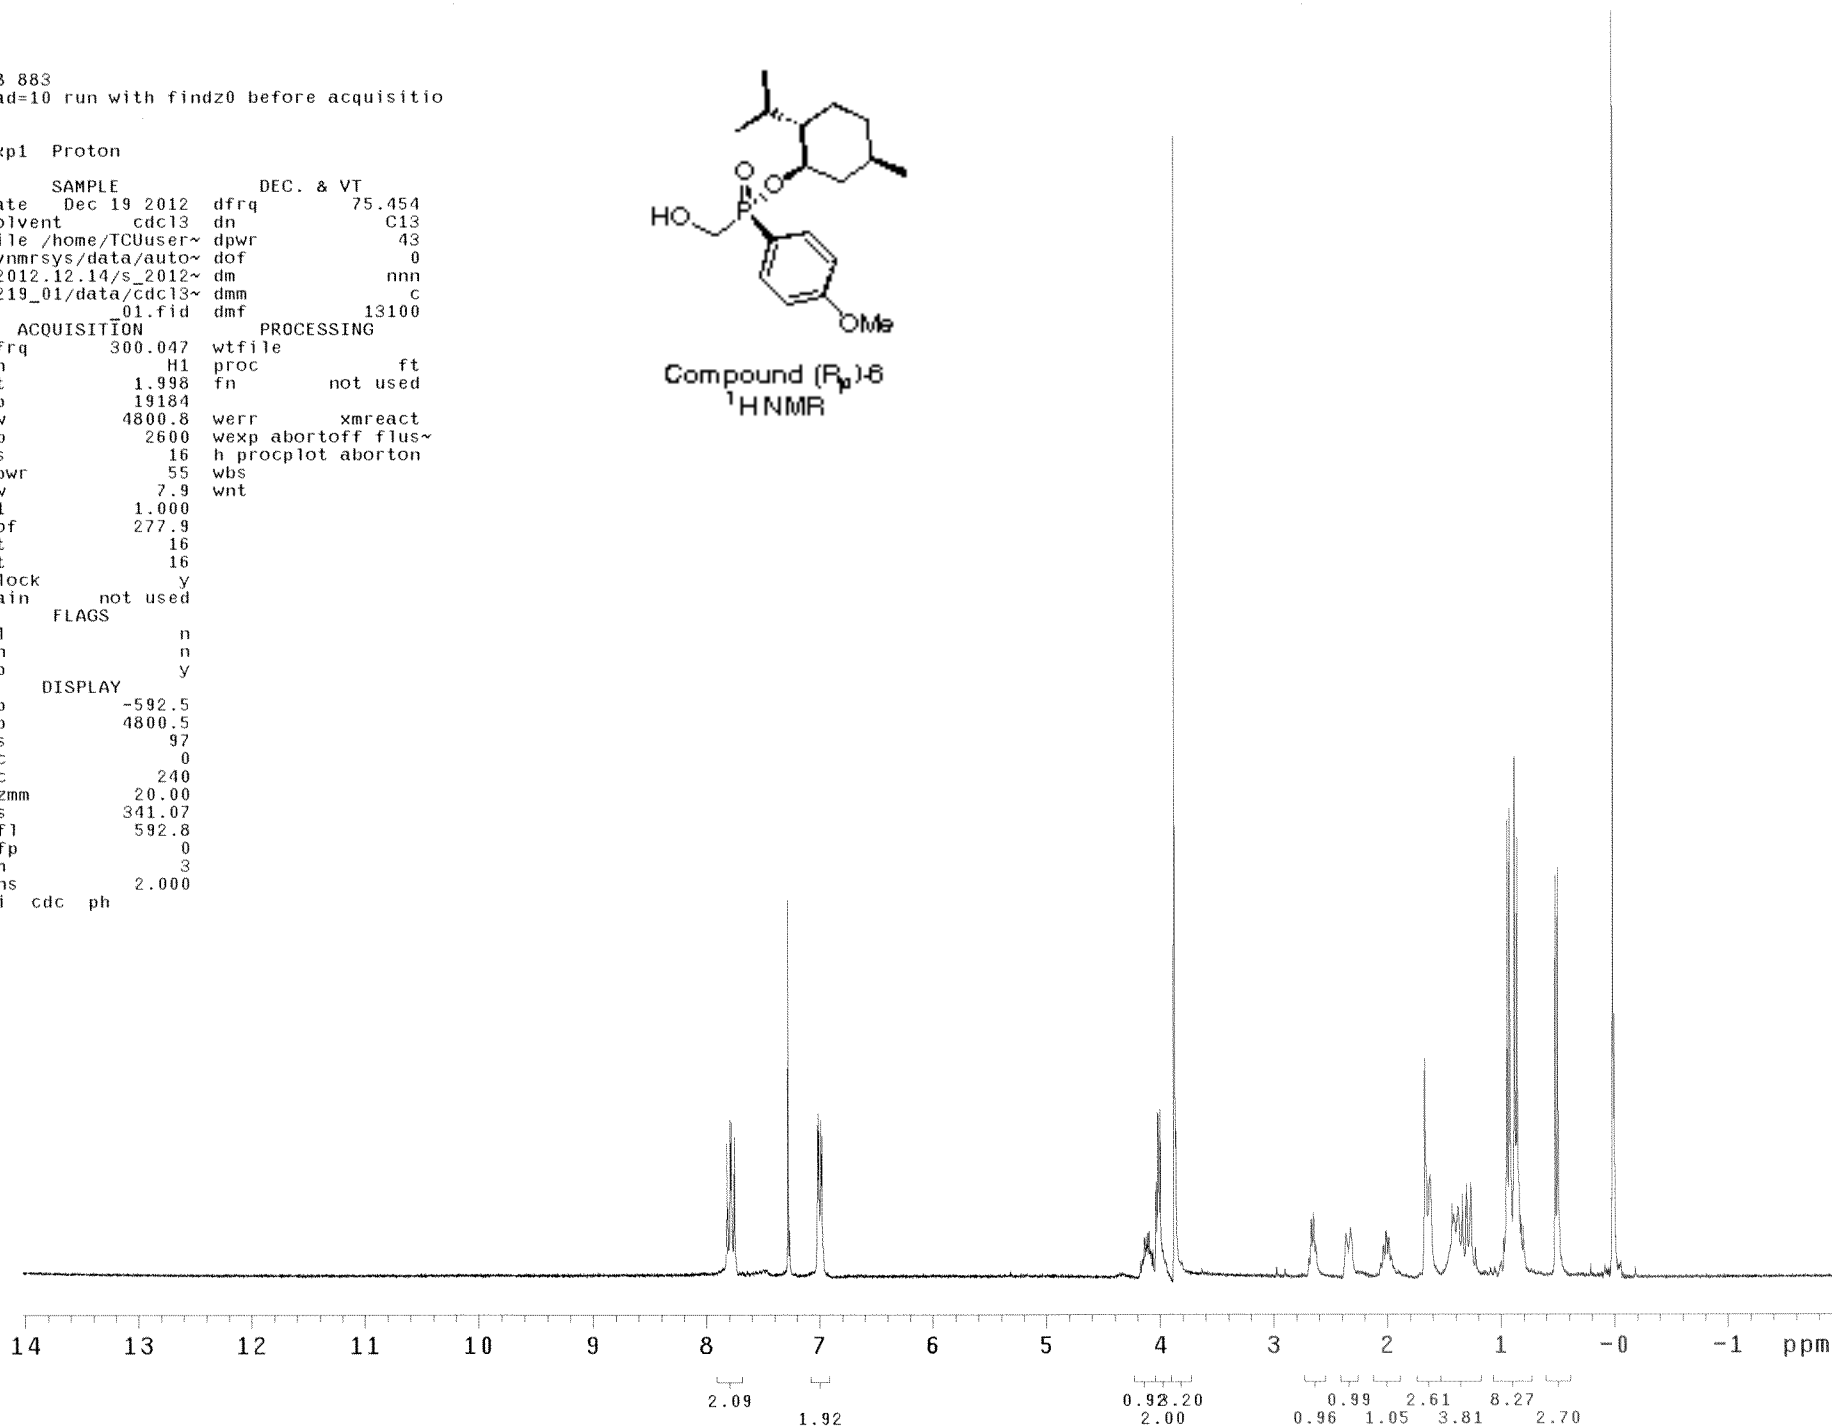

OB 883

exp1 Carbon

```

SAMPLE          SPECIAL
date    Dec 19 2012  temp    not used
solvent  cdc13      gain     20
file    /home/TCUser~  spin     20
/vnmr~   /data/auto~  hst      0.008
_2012.12.14/s_2012~  pw90    18.500
1219_02/data/cdc13~  alfa    10.000
03.fid
ACQUISITION     il      n
sw             18115.9  in      n
at             1.301  dp      y
np             47120  hs     nn
fb             10000
bs             64     lb     0.50
d1             2.000  fn     not used
nt             800
ct             800   sp     -1135.5
TRANSMITTER     wp     18115.4
tn             C13   rfl    1136.1
sfrq          75.454  rfp     0
tof           766.0  rp      5.2
tpwr          58     lp     -204.1
pw           9.250
DECOUPLER      wc     250
dn             H1   sc     0
dof            0    vs     510
dm            yyy  th     7
dmm            w   ai    cdc ph
dpwr          35
dmf           6700

```

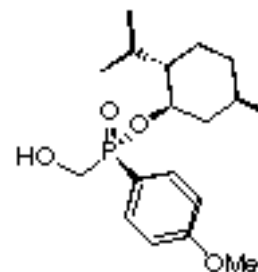

Compound (F<sub>p</sub>)-6  
13C NMR

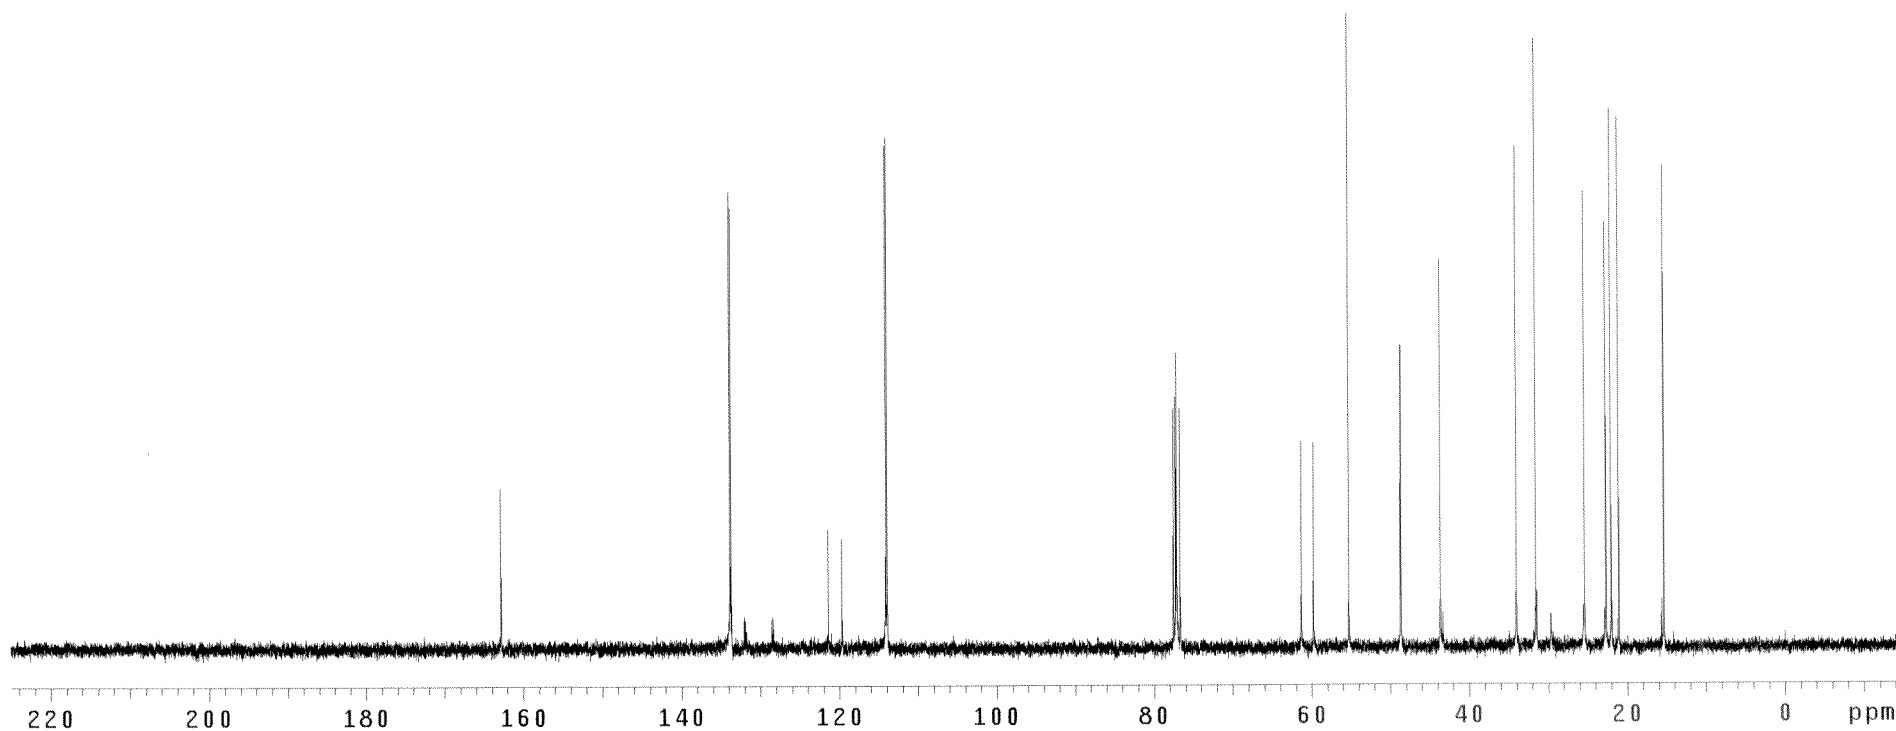

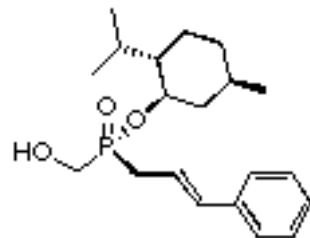

Compound (R<sub>p</sub>)-4  
<sup>31</sup>P/<sup>1</sup>H NMR decoupled

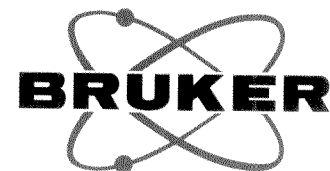

Current Data Parameters  
 NAME OB 2157 after column  
 EXPNO 1  
 PROCNO 1

F2 - Acquisition Parameters  
 Date\_ 20150828  
 Time\_ 18.10  
 INSTRUM spect  
 PROBHD 5 mm PABBO BB/  
 PULPROG zgpg30  
 TD 65536  
 SOLVENT CDC13  
 NS 16  
 DS 4  
 SWH 64102.563 Hz  
 FIDRES 0.978127 Hz  
 AQ 0.5111808 sec  
 RG 203.57  
 DW 7.800 usec  
 DE 6.50 usec  
 TE 295.4 K  
 D1 2.00000000 sec  
 D11 0.03000000 sec  
 TDO 1

==== CHANNEL f1 =====  
 SFO1 161.9674942 MHz  
 NUC1 31P  
 P1 14.25 usec  
 PLW1 15.00000000 W

==== CHANNEL f2 =====  
 SFO2 400.1316005 MHz  
 NUC2 1H  
 CPDPRG[2] waltz16  
 PCPD2 90.00 usec  
 PLW2 10.00000000 W  
 PLW12 0.31604999 W  
 PLW13 0.25600001 W

F2 - Processing parameters  
 SI 32768  
 SF 161.9755930 MHz  
 WDW EM  
 SSB 0  
 LB 1.00 Hz  
 GB 0  
 PC 1.40

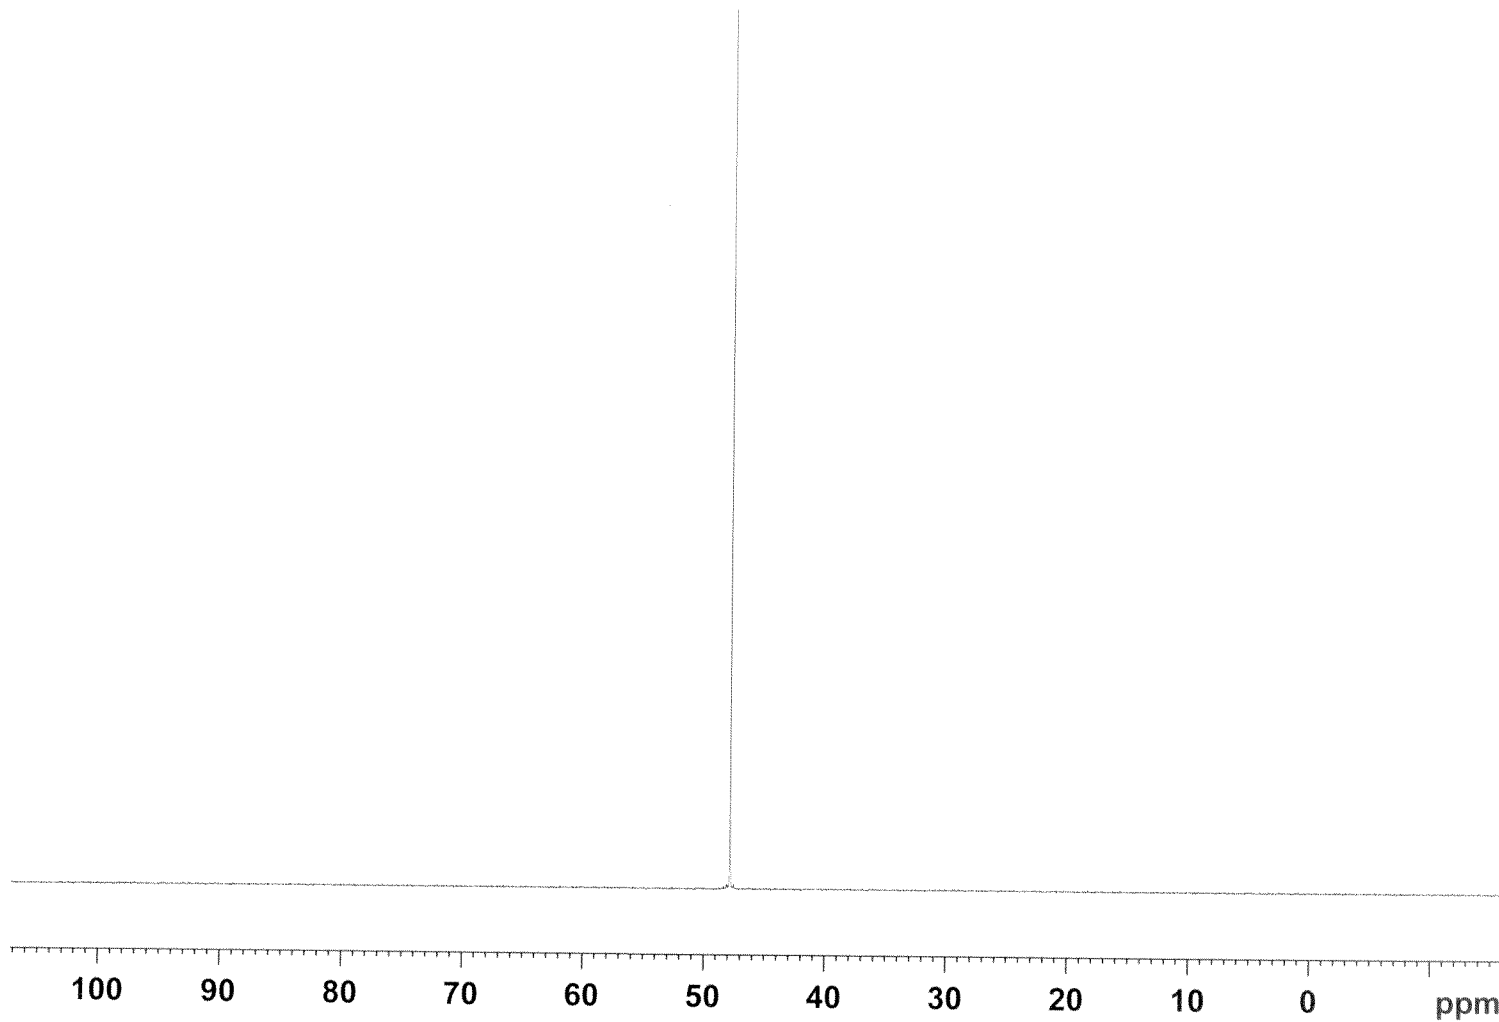



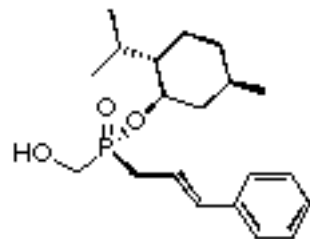

Compound (Fp)4  
<sup>31</sup>P/<sup>1</sup>H NMR coupled

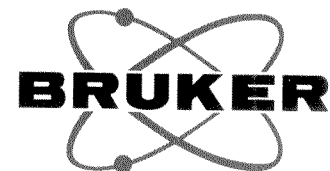

Current Data Parameters  
 NAME OB 2157 after column  
 EXPNO 2  
 PROCNO 1

F2 - Acquisition Parameters  
 Date\_ 20150828  
 Time\_ 18.14  
 INSTRUM spect  
 PROBHD 5 mm PABBO BB/  
 PULPROG zg30  
 TD 65536  
 SOLVENT CDC13  
 NS 32  
 DS 4  
 SWH 64102.563 Hz  
 FIDRES 0.978127 Hz  
 AQ 0.5111808 sec  
 RG 203.57  
 DW 7.800 usec  
 DE 6.50 usec  
 TE 294.9 K  
 D1 2.00000000 sec  
 TD0 1

==== CHANNEL f1 =====  
 SFO1 161.9674942 MHz  
 NUC1 31P  
 P1 14.25 usec  
 PLW1 15.00000000 W

F2 - Processing parameters  
 SI 32768  
 SF 161.9755930 MHz  
 WDW EM  
 SSB 0  
 LB 1.00 Hz  
 GB 0  
 PC 1.40

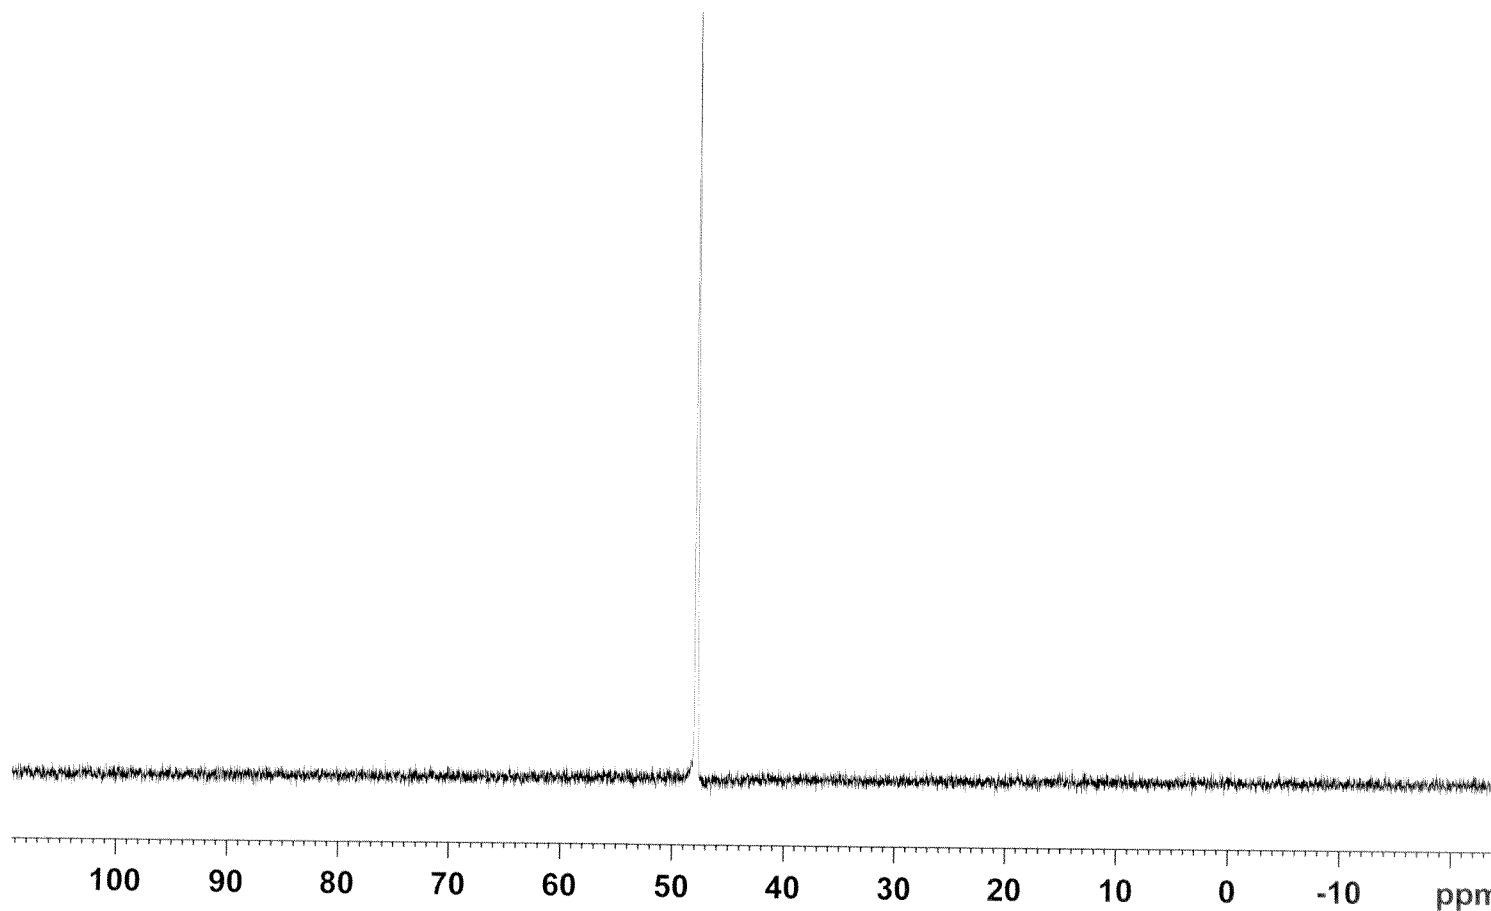

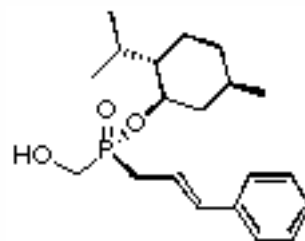

Compound (F<sub>p</sub>)-4  
<sup>1</sup>H NMR

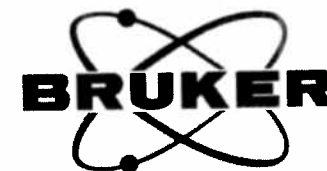

Current Data Parameters  
 NAME OB 2157 after column  
 EXPNO 3  
 PROCNO 1

F2 - Acquisition Parameters  
 Date 20150828  
 Time 18.16  
 INSTRUM spect  
 PROBHD 5 mm PABBO BB/  
 PULPROG zg30  
 TD 65536  
 SOLVENT CDC13  
 NS 9  
 DS 2  
 SWH 8012.820 Hz  
 FIDRES 0.122266 Hz  
 AQ 4.0894465 sec  
 RG 81.67  
 DW 62.400 usec  
 DE 6.50 usec  
 TE 294.9 K  
 D1 1.0000000 sec  
 TD0 1

===== CHANNEL f1 =====  
 SFO1 400.1324710 MHz  
 NUC1 1H  
 P1 10.00 usec  
 PLW1 25.00300026 W

F2 - Processing parameters  
 SI 65536  
 SF 400.1300000 MHz  
 WDW EM  
 SSB 0  
 LB 0.30 Hz  
 GB 0  
 PC 1.00

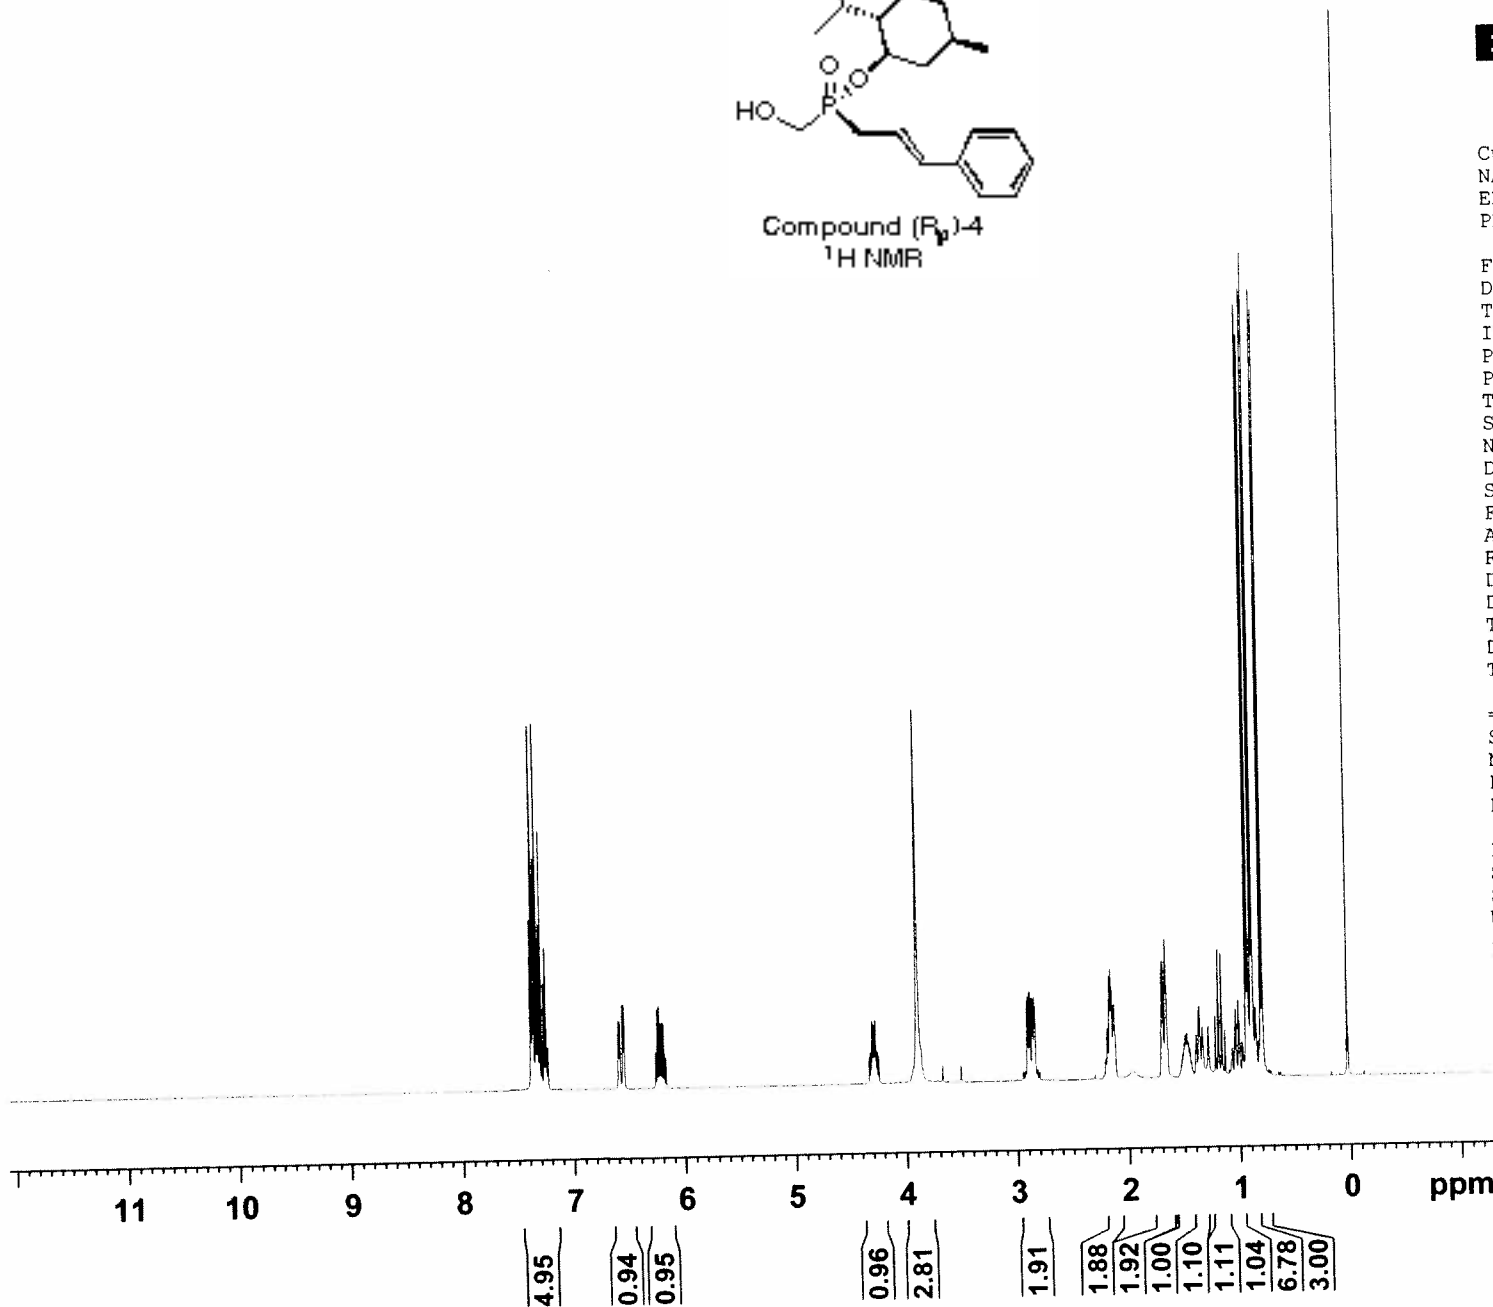

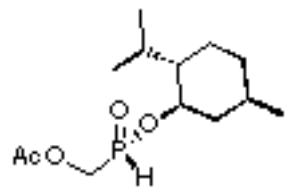

Compound (Rp)-7  
<sup>31</sup>P/<sup>1</sup>H NMR decoupled

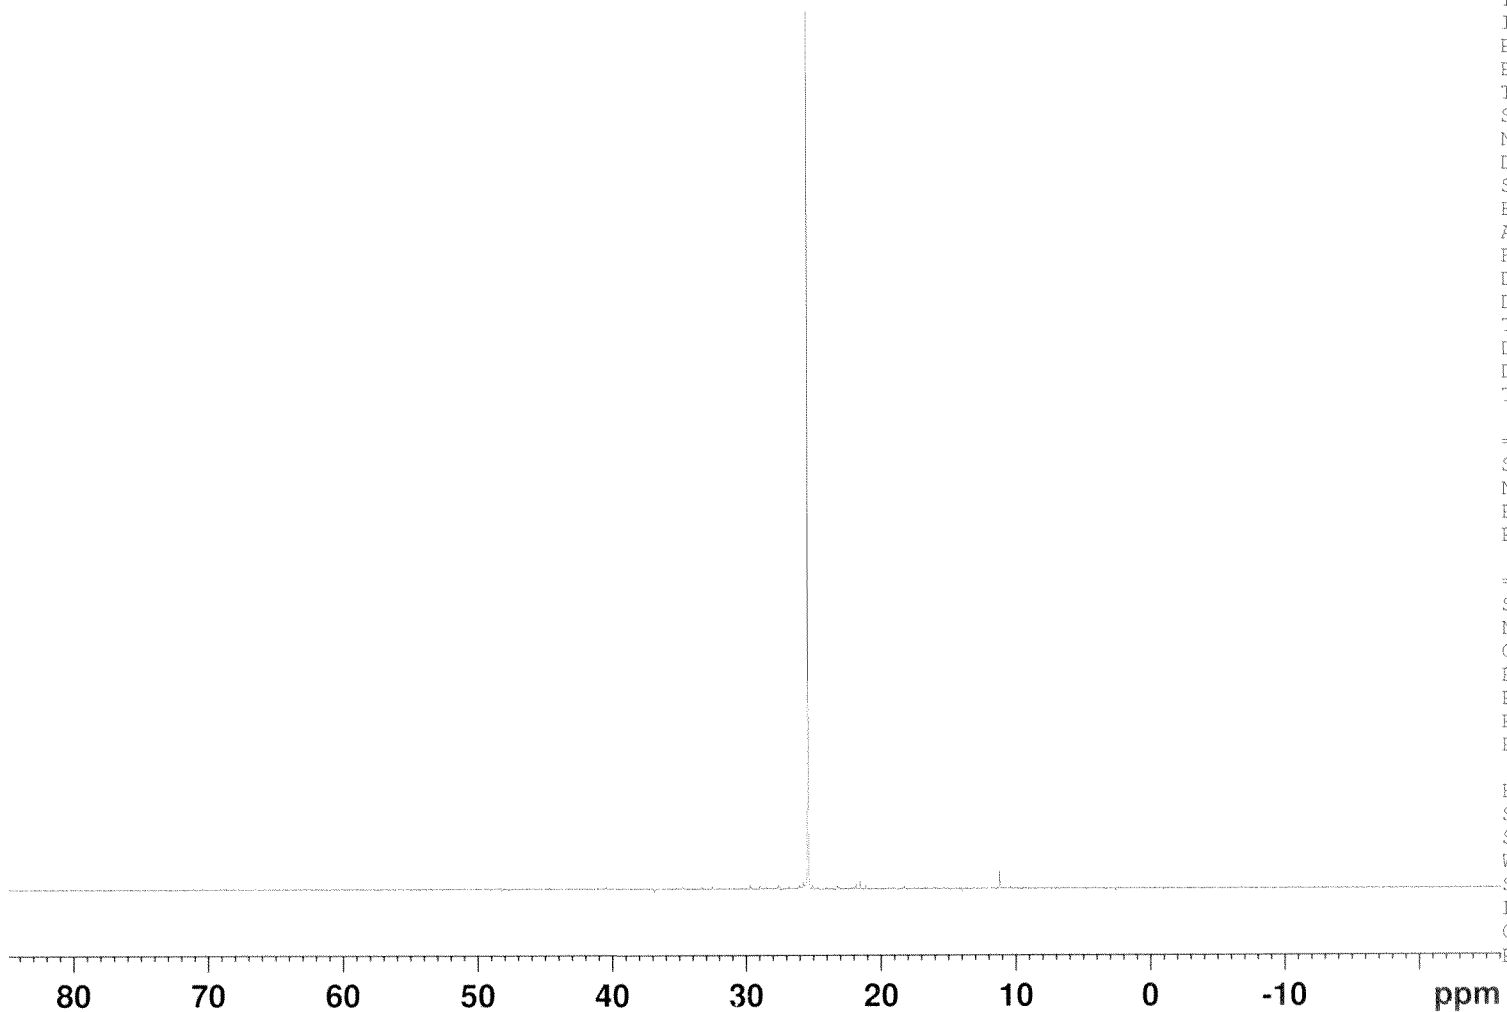

Current Data Parameters  
 NAME OB 1904  
 EXPNO 1  
 PROCNO 1

F2 - Acquisition Parameters  
 Date\_ 20150121  
 Time 11.14  
 INSTRUM spect  
 PROBHD 5 mm PABBO BB/  
 PULPROG zgpg30  
 TD 65536  
 SOLVENT Acetone  
 NS 16  
 DS 4  
 SWH 64102.563 Hz  
 FIDRES 0.978127 Hz  
 AQ 0.5111808 sec  
 RG 203.57  
 DW 7.800 usec  
 DE 6.50 usec  
 TE 297.4 K  
 D1 2.00000000 sec  
 D11 0.03000000 sec  
 TD0 1

==== CHANNEL f1 =====  
 SF01 161.9674942 MHz  
 NUC1 31P  
 P1 14.25 usec  
 PLW1 15.00000000 W

==== CHANNEL f2 =====  
 SF02 400.1316005 MHz  
 NUC2 1H  
 CPDPRG[2] waltz16  
 PCPD2 90.00 usec  
 PLW2 10.00000000 W  
 PLW12 0.31604999 W  
 PLW13 0.25600001 W

F2 - Processing parameters  
 SI 32768  
 SF 161.9755930 MHz  
 WDW EM  
 SSB 0  
 LB 1.00 Hz  
 GB 0  
 PC 1.40

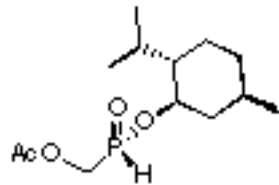

Compound (Rp)-7  
<sup>31</sup>P/<sup>1</sup>H NMR coupled

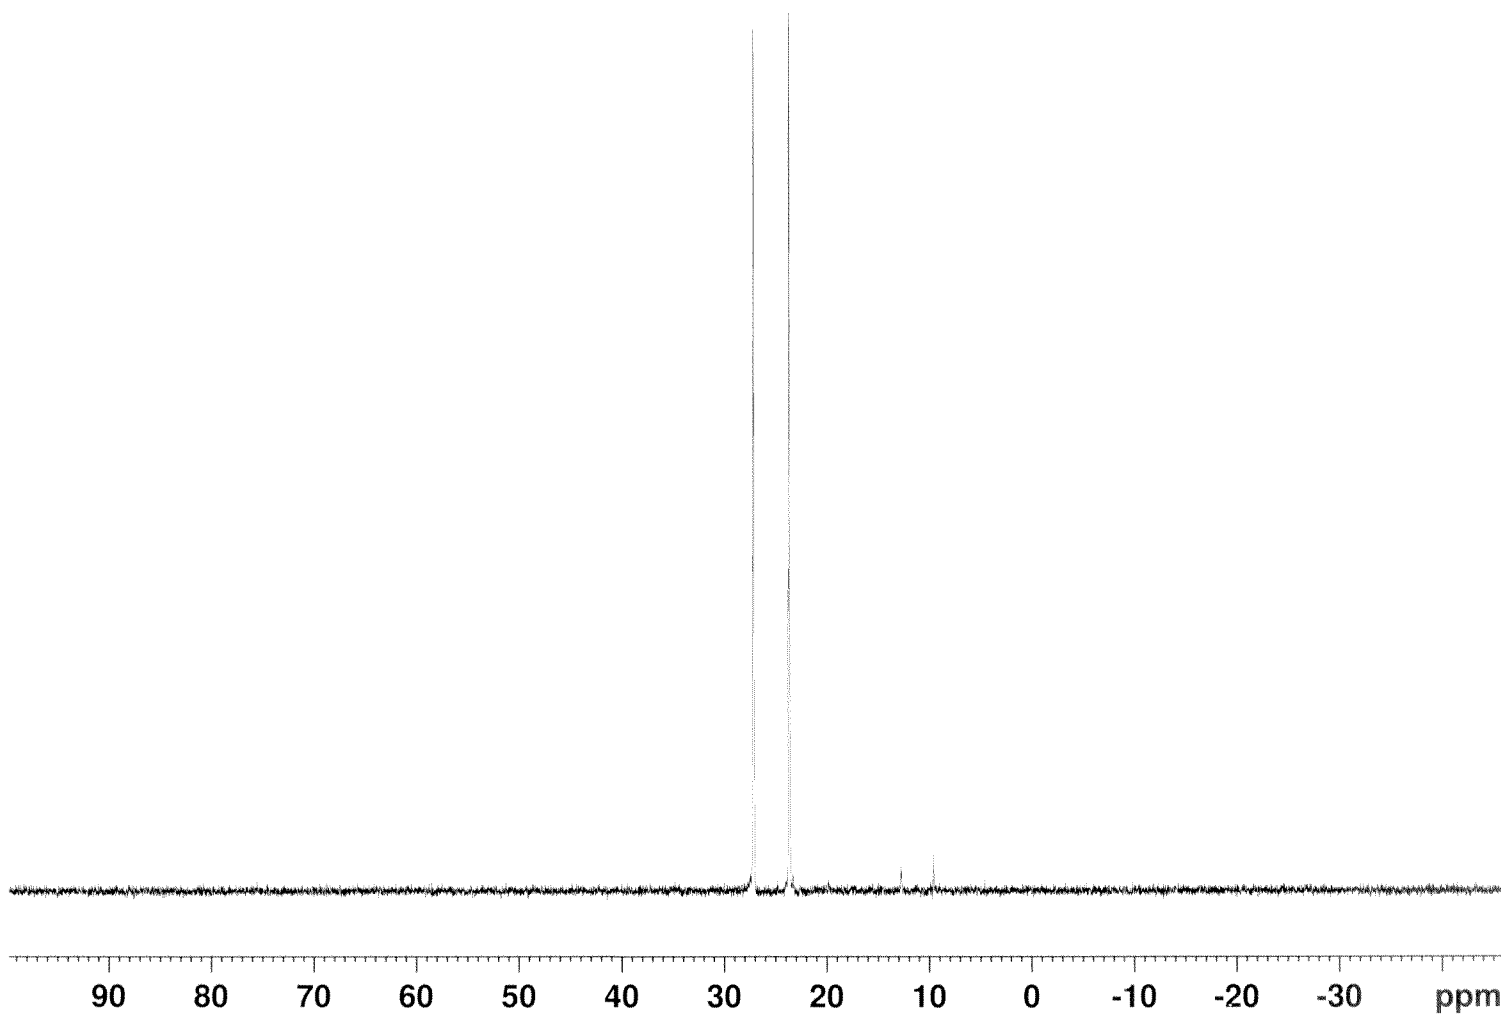

Current Data Parameters  
 NAME OB 1904  
 EXPNO 2  
 PROCNO 1

F2 - Acquisition Parameters  
 Date\_ 20150121  
 Time 11.16  
 INSTRUM spect  
 PROBHD 5 mm PABBO BB/  
 PULPROG zg30  
 TD 65536  
 SOLVENT Acetone  
 NS 32  
 DS 4  
 SWH 64102.563 Hz  
 FIDRES 0.978127 Hz  
 AQ 0.5111808 sec  
 RG 203.57  
 DW 7.800 usec  
 DE 6.50 usec  
 TE 297.0 K  
 D1 2.00000000 sec  
 TD0 1

==== CHANNEL f1 =====  
 SFO1 161.9674942 MHz  
 NUC1 31P  
 P1 14.25 usec  
 PLW1 15.00000000 W

F2 - Processing parameters  
 SI 32768  
 SF 161.9755930 MHz  
 WDW EM  
 SSB 0  
 LB 1.00 Hz  
 GB 0  
 PC 1.40

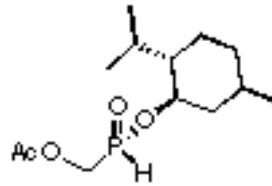

Compound (R<sub>p</sub>)-7  
<sup>1</sup>H NMR

Current Data Parameters  
 NAME OB 1781 after work-up  
 EXPNO 3  
 PROCNO 1

F2 - Acquisition Parameters  
 Date\_ 20141015  
 Time 18.09  
 INSTRUM spect  
 PROBHD 5 mm PABBO BB/  
 PULPROG zg30  
 TD 65536  
 SOLVENT CDCl3  
 NS 7  
 DS 2  
 SWH 8012.820 Hz  
 FIDRES 0.122266 Hz  
 AQ 4.0894465 sec  
 RG 81.67  
 DW 62.400 usec  
 DE 6.50 usec  
 TE 294.9 K  
 D1 1.00000000 sec  
 TD0 1

==== CHANNEL f1 =====  
 SFO1 400.1324710 MHz  
 NUC1 1H  
 P1 10.00 usec  
 PLW1 25.00300026 W

F2 - Processing parameters  
 SI 65536  
 SF 400.1300000 MHz  
 WDW EM  
 SSB 0  
 LB 0.30 Hz  
 GB 0  
 PC 1.00

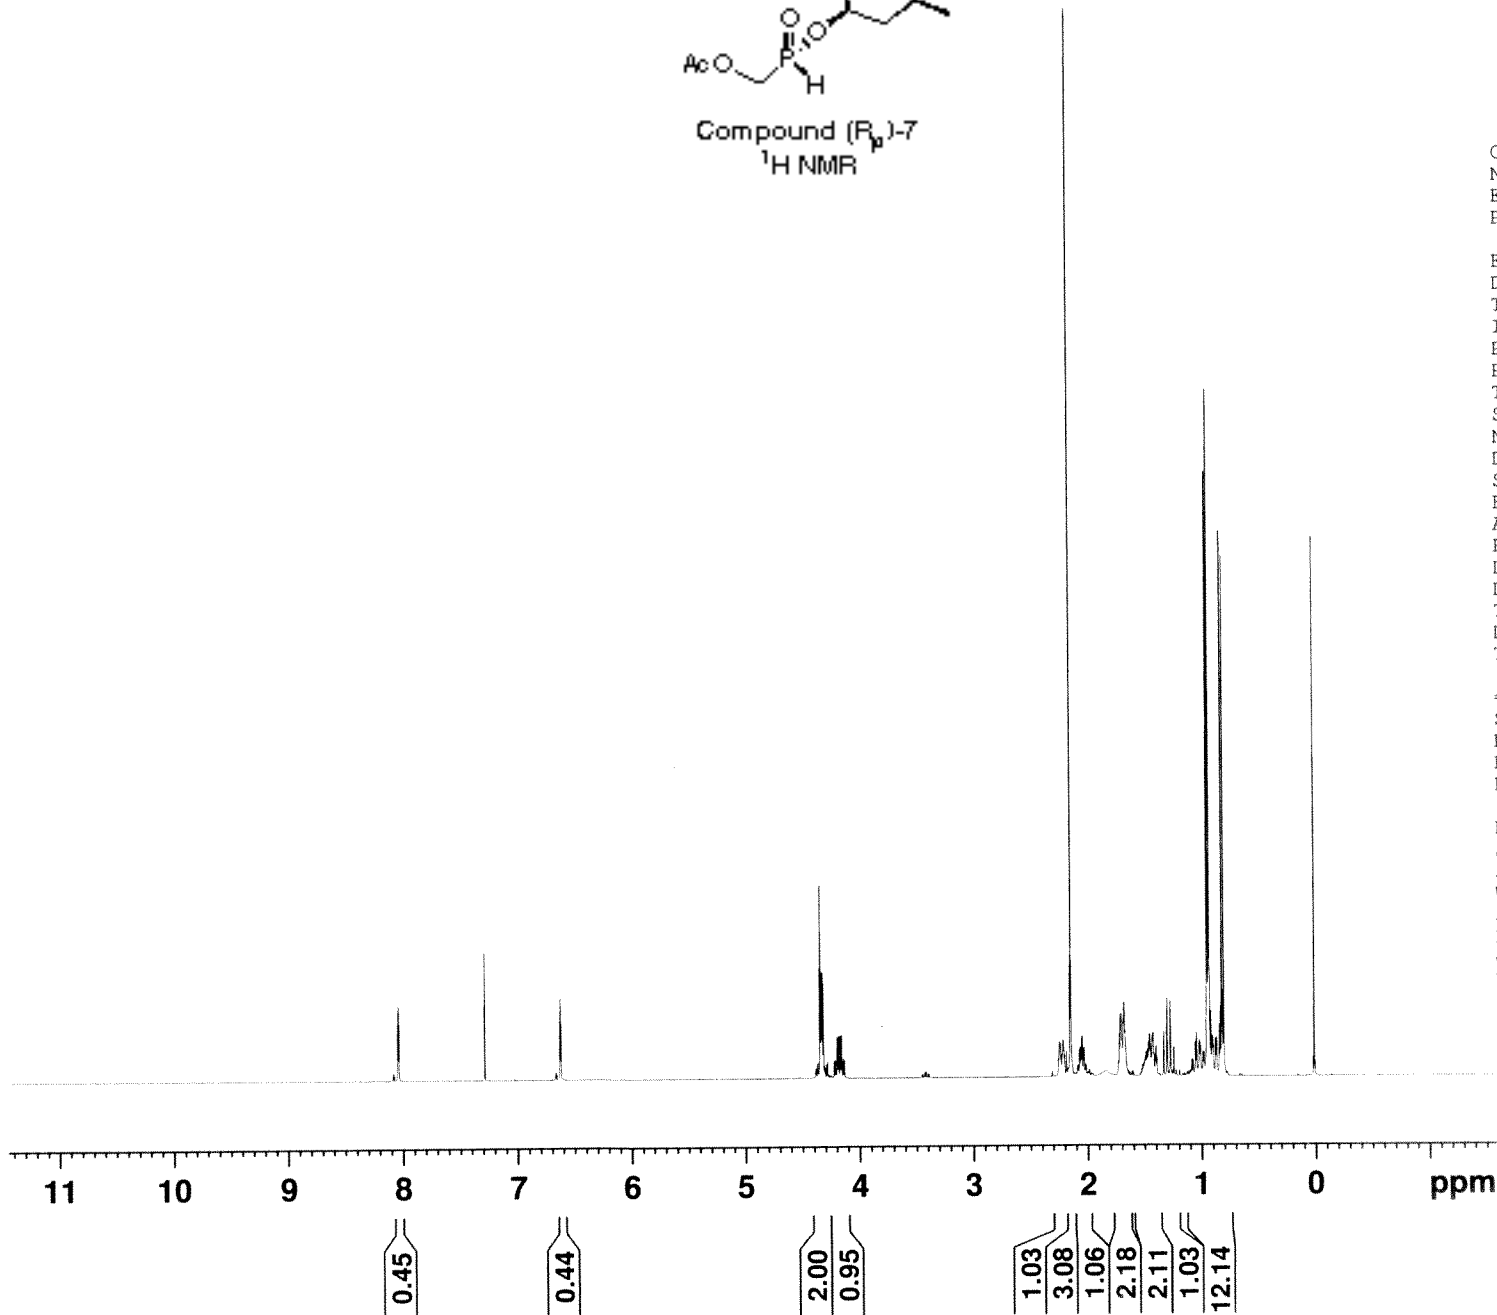

11 10 9 8 7 6 5 4 3 2 1 0 ppm

0.45

0.44

2.00  
0.95

1.03  
3.08  
1.06  
2.18  
2.11  
1.03  
12.14

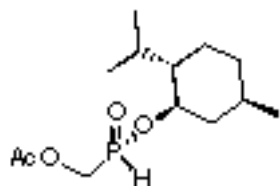

Compound (R<sub>p</sub>)-7  
<sup>13</sup>C NMR

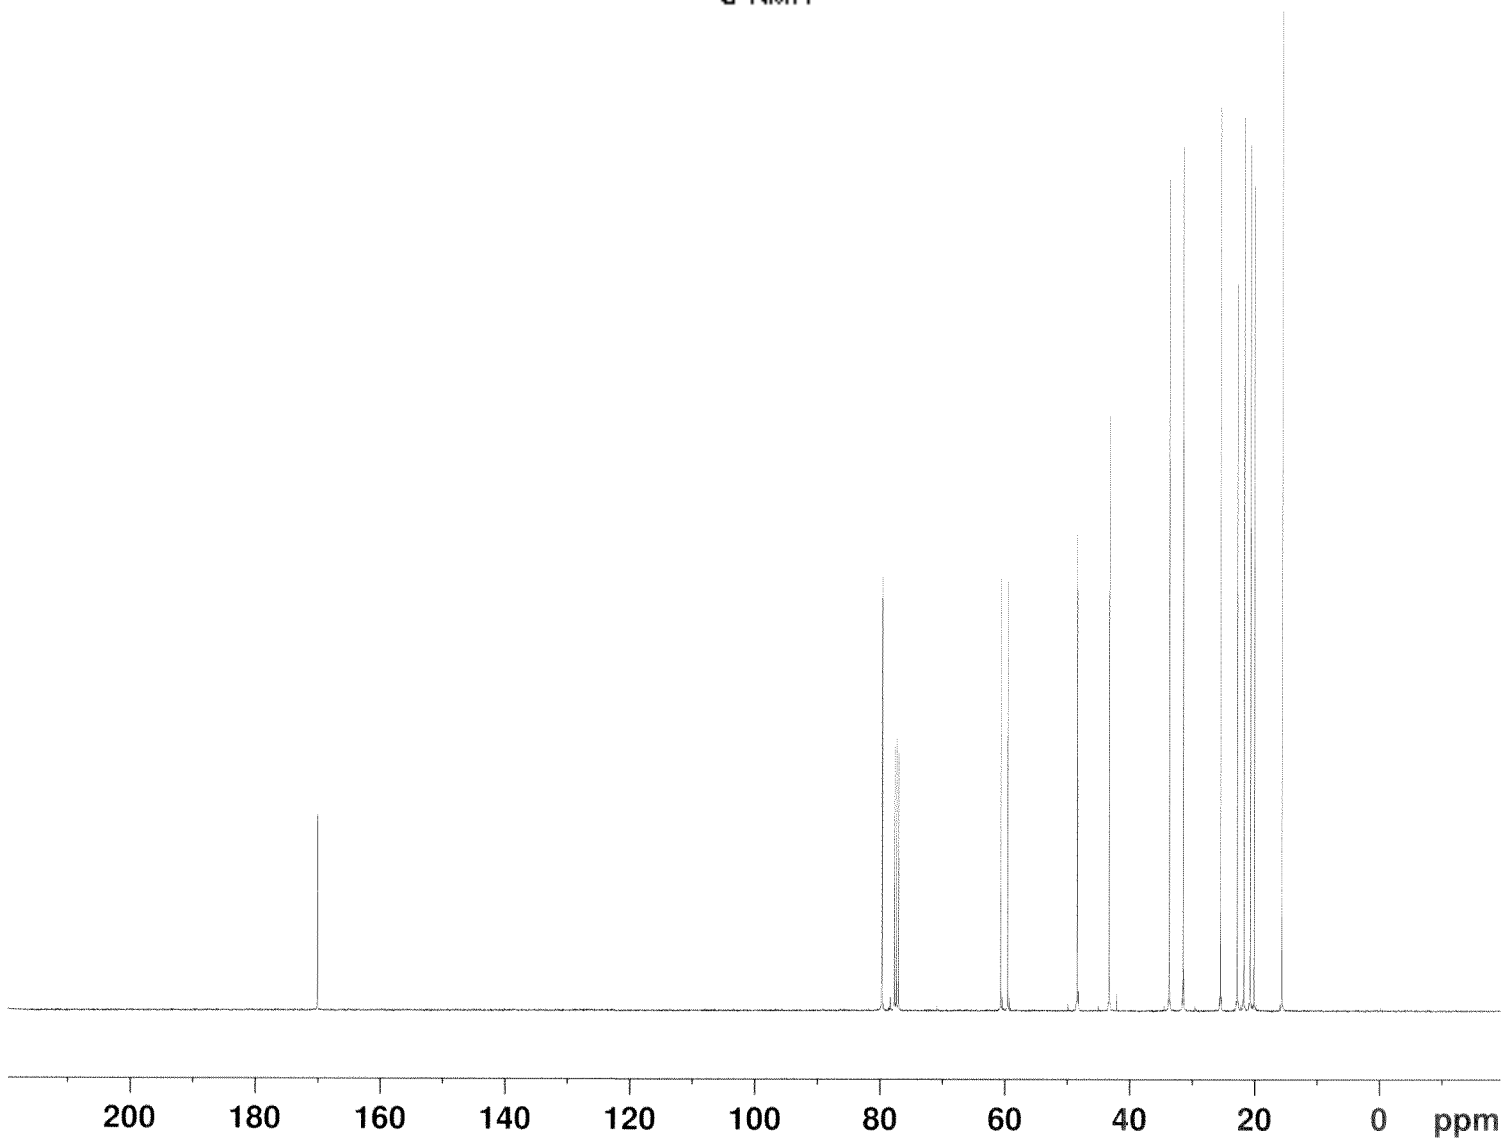

Current Data Parameters  
 NAME OB 1169  
 EXPNO 4  
 PROCNO 1

F2 - Acquisition Parameters  
 Date\_ 20130712  
 Time 18.02  
 INSTRUM spect  
 PROBHD 5 mm PABBO BB/  
 PULPROG zgpg30  
 TD 65536  
 SOLVENT CDCl3  
 NS 857  
 DS 4  
 SWH 24038.461 Hz  
 FIDRES 0.366798 Hz  
 AQ 1.3631488 sec  
 RG 203.57  
 DW 20.800 usec  
 DE 6.50 usec  
 TE 295.2 K  
 D1 2.00000000 sec  
 D11 0.03000000 sec  
 TD0 1

==== CHANNEL f1 =====  
 SFO1 100.6228293 MHz  
 NUC1 13C  
 P1 10.00 usec  
 PLW1 45.00000000 W

==== CHANNEL f2 =====  
 SFO2 400.1316005 MHz  
 NUC2 1H  
 CPDPRG[2] waltz16  
 PCPD2 90.00 usec  
 PLW2 10.00000000 W  
 PLW12 0.31604999 W  
 PLW13 0.25600001 W

F2 - Processing parameters  
 SI 32768  
 SF 100.6127690 MHz  
 WDW EM  
 SSB 0  
 LB 1.00 Hz  
 GB 0  
 PC 1.40

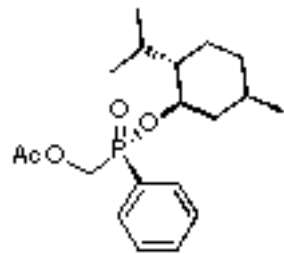

Compound (R<sub>p</sub>)-3a  
<sup>31</sup>P/<sup>1</sup>H NMR decoupled

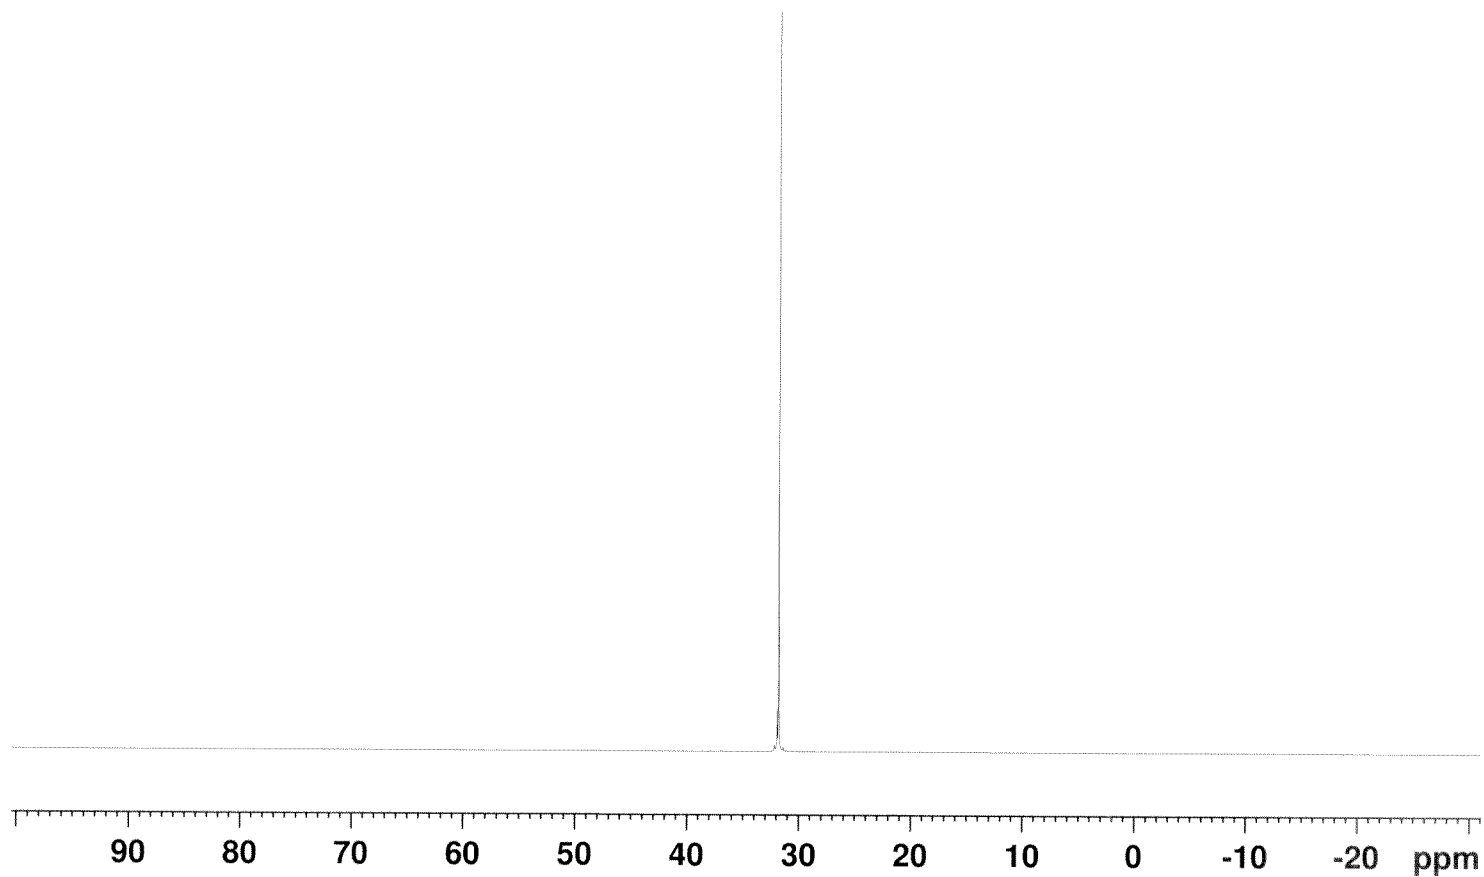

Current Data Parameters  
 NAME OB 1379 pure  
 EXPNO 5  
 PROCNO 1

F2 - Acquisition Parameters  
 Date\_ 20140320  
 Time 18.02  
 INSTRUM spect  
 PROBHD 5 mm PABBO BB/  
 PULPROG zgpg30  
 TD 65536  
 SOLVENT CDCl3  
 NS 16  
 DS 4  
 SWH 64102.563 Hz  
 FIDRES 0.978127 Hz  
 AQ 0.5111808 sec  
 RG 203.57  
 DW 7.800 usec  
 DE 6.50 usec  
 TE 296.5 K  
 D1 2.00000000 sec  
 D11 0.03000000 sec  
 TD0 1

==== CHANNEL f1 =====  
 SFO1 161.9674942 MHz  
 NUC1 31P  
 P1 14.25 usec  
 PLW1 15.00000000 W

==== CHANNEL f2 =====  
 SFO2 400.1316005 MHz  
 NUC2 1H  
 CPDPRG{2 waltz16  
 PCPD2 90.00 usec  
 PLW2 10.00000000 W  
 PLW12 0.31604999 W  
 PLW13 0.25600001 W

F2 - Processing parameters  
 SI 32768  
 SF 161.9755930 MHz  
 WDW EM  
 SSB 0  
 LB 1.00 Hz  
 GB 0  
 PC 1.40

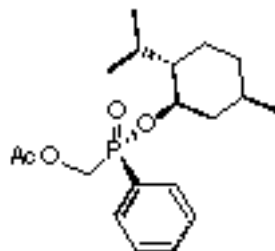

Compound (F<sub>2</sub>)-3a  
<sup>31</sup>P/<sup>1</sup>H NMR coupled

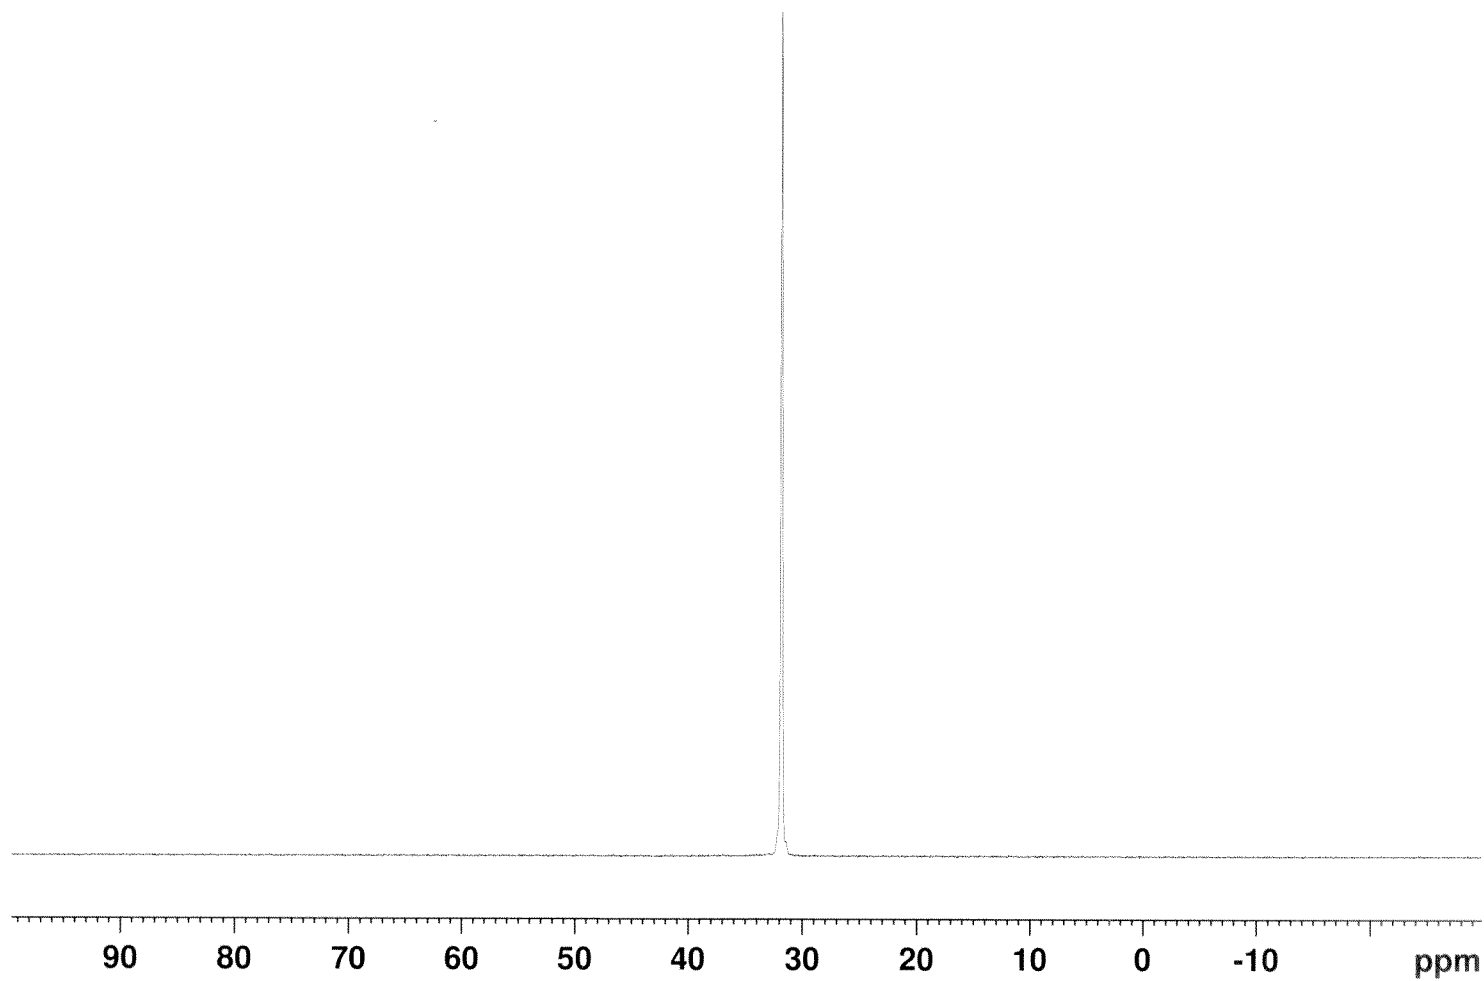

Current Data Parameters  
NAME OB 1379 pure  
EXPNO 2  
PROCNO 1

F2 - Acquisition Parameters  
Date\_ 20140320  
Time 18.06  
INSTRUM spect  
PROBHD 5 mm PABBO BB/  
PULPROG zg30  
TD 65536  
SOLVENT CDCl3  
NS 32  
DS 4  
SWH 64102.563 Hz  
FIDRES 0.978127 Hz  
AQ 0.5111808 sec  
RG 203.57  
DW 7.800 usec  
DE 6.50 usec  
TE 295.7 K  
D1 2.00000000 sec  
TDO 1

==== CHANNEL f1 =====  
SFO1 161.9674942 MHz  
NUC1 31P  
P1 14.25 usec  
PLW1 15.00000000 W

F2 - Processing parameters  
SI 32768  
SF 161.9755930 MHz  
WDW EM  
SSB 0  
LB 1.00 Hz  
GB 0  
PC 1.40



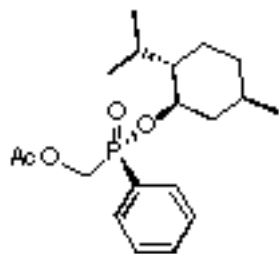

Compound (R<sub>p</sub>)-8a  
<sup>1</sup>H NMR

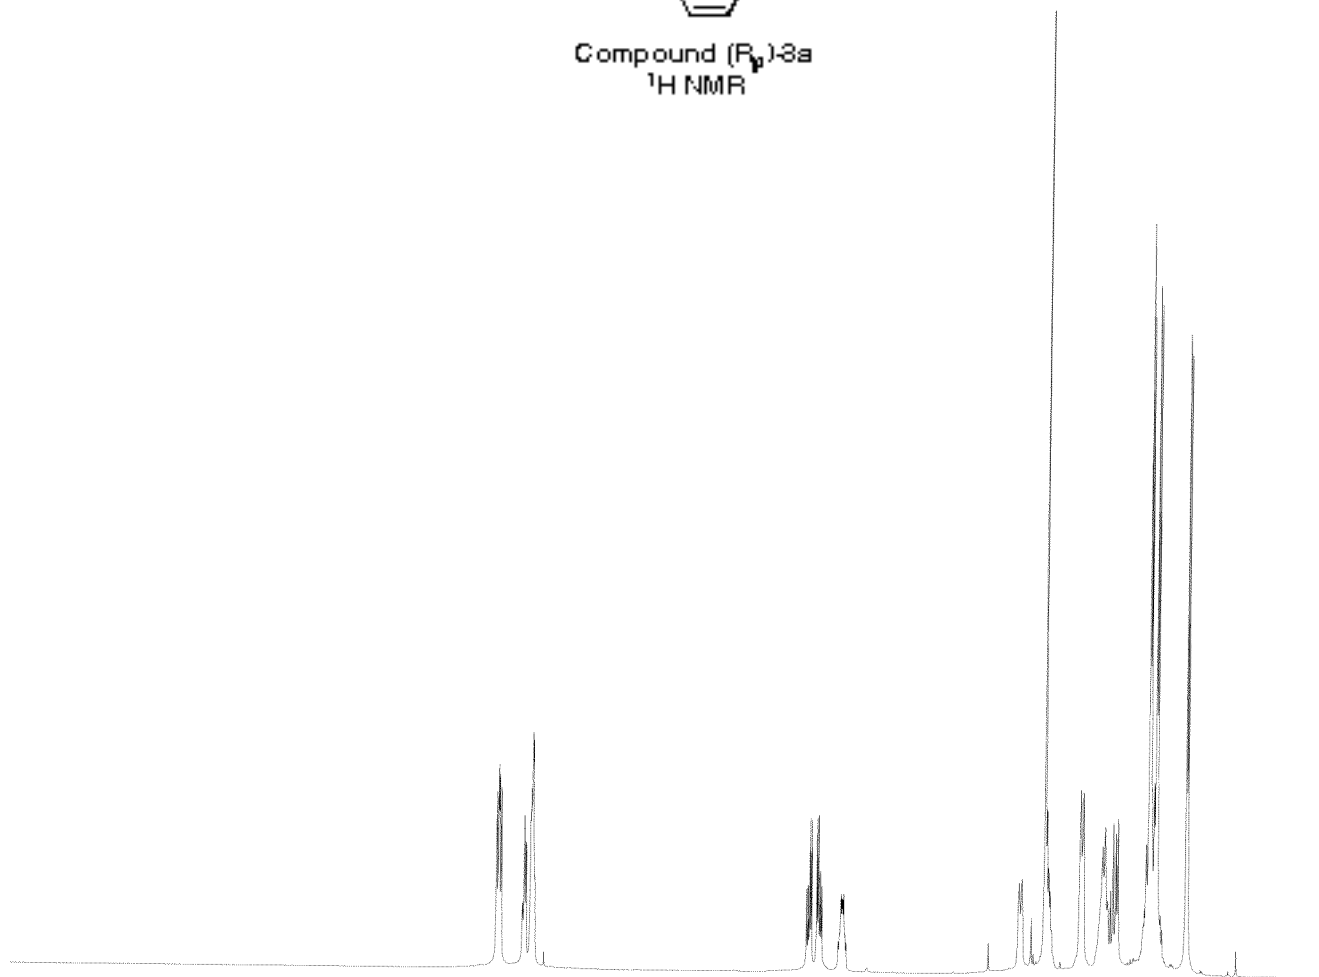

12 11 10 9 8 7 6 5 4 3 2 1 ppm

2.10  
3.05

2.16  
0.97

1.14  
4.21  
2.27  
4.18  
9.16  
3.00  
0.03

Current Data Parameters  
 NAME OB 1379 pure  
 EXPNO 3  
 PROCNO 1

F2 - Acquisition Parameters  
 Date\_ 20140320  
 Time 18.09  
 INSTRUM spect  
 PROBHD 5 mm PABBO BB/  
 PULPROG zg30  
 TD 65536  
 SOLVENT CDC13  
 NS 16  
 DS 2  
 SWH 8012.820 Hz  
 FIDRES 0.122266 Hz  
 AQ 4.0894465 sec  
 RG 12.96  
 DW 62.400 usec  
 DE 6.50 usec  
 TE 295.6 K  
 D1 1.00000000 sec  
 TD0 1

==== CHANNEL f1 =====  
 SFO1 400.1324710 MHz  
 NUC1 1H  
 P1 10.00 usec  
 PLW1 25.00300026 W

F2 - Processing parameters  
 SI 65536  
 SF 400.1300000 MHz  
 WDW EM  
 SSB 0  
 LB 0.30 Hz  
 GB 0  
 PC 1.00

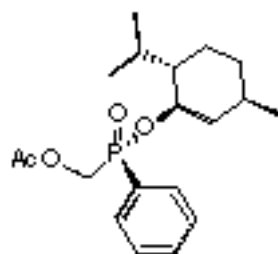

Compound (R<sub>p</sub>)-3a  
<sup>13</sup>C NMR

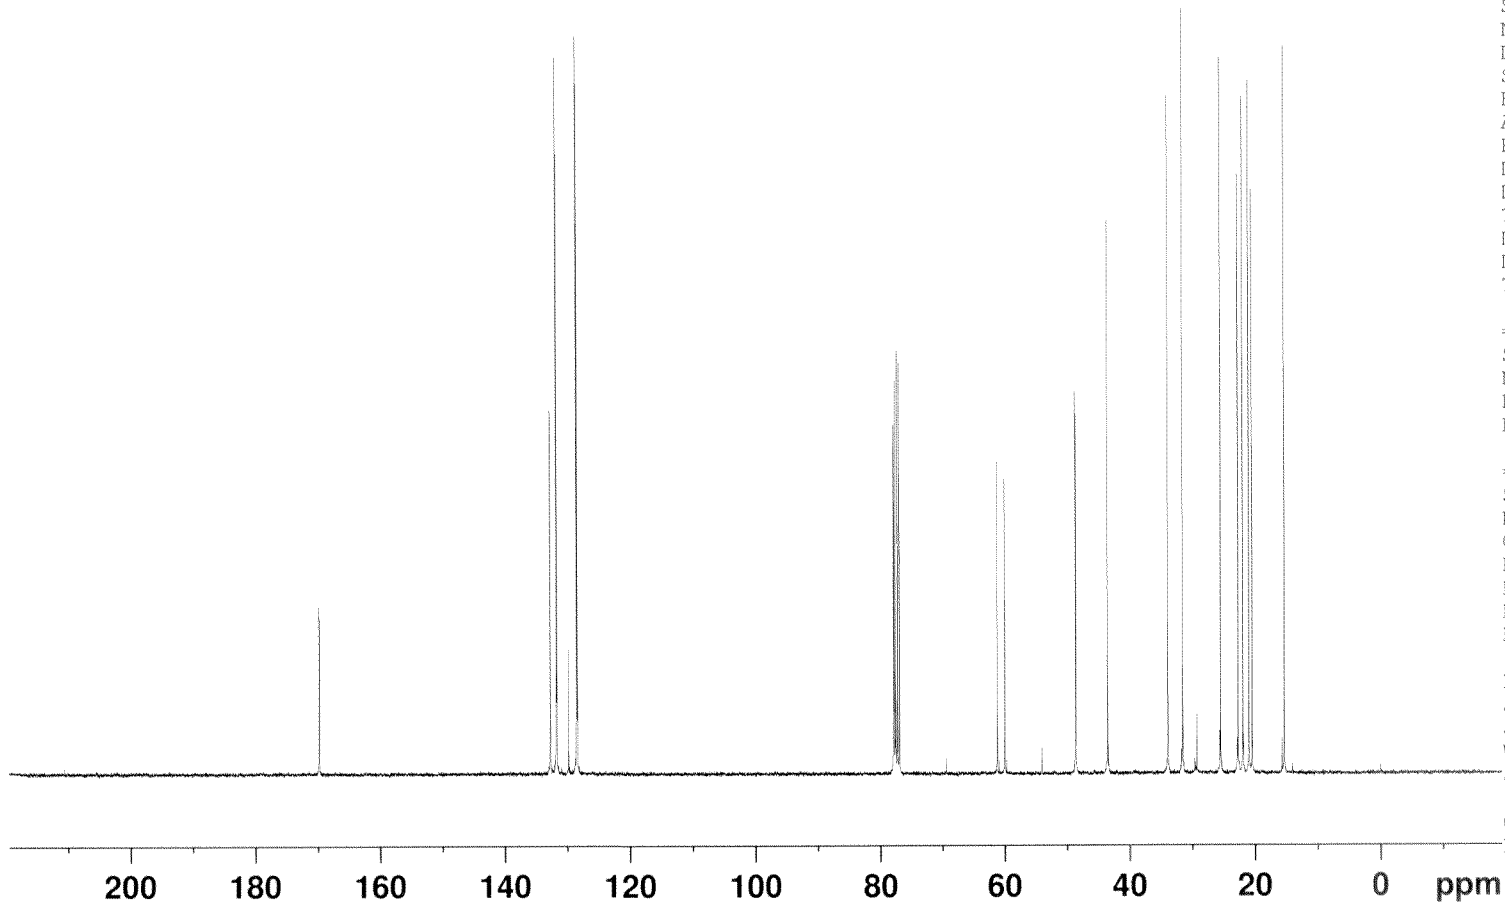

Current Data Parameters  
 NAME OB 1379 pure  
 EXPNO 4  
 PROCNO 1

F2 - Acquisition Parameters  
 Date\_ 20140320  
 Time 18.52  
 INSTRUM spect  
 PROBHD 5 mm PABBO BB/  
 PULPROG zgpg30  
 TD 65536  
 SOLVENT CDCl3  
 NS 733  
 DS 4  
 SWH 24038.461 Hz  
 FIDRES 0.366798 Hz  
 AQ 1.3631488 sec  
 RG 203.57  
 DW 20.800 usec  
 DE 6.50 usec  
 TE 296.9 K  
 D1 2.0000000 sec  
 D11 0.0300000 sec  
 TD0 1

==== CHANNEL f1 =====  
 SFO1 100.6228293 MHz  
 NUC1 13C  
 P1 10.00 usec  
 PLW1 45.0000000 W

==== CHANNEL f2 =====  
 SFO2 400.1316005 MHz  
 NUC2 1H  
 CPDPRG[2] waltz16  
 PCPD2 90.00 usec  
 PLW2 10.0000000 W  
 PLW12 0.31604999 W  
 PLW13 0.25600001 W

F2 - Processing parameters  
 SI 32768  
 SF 100.6127690 MHz  
 WDW EM  
 SSB 0  
 LB 1.00 Hz  
 GB 0  
 PC 1.40

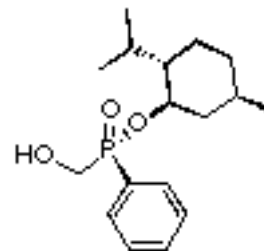

Compound (Rp)-3  
<sup>31</sup>P/<sup>1</sup>H NMR decoupled

Current Data Parameters  
 NAME OB 1438 pure  
 EXPNO 1  
 PROCNO 1

F2 - Acquisition Parameters  
 Date\_ 20140424  
 Time 17.03  
 INSTRUM spect  
 PROBHD 5 mm PABBO BB/  
 PULPROG zgpg30  
 TD 65536  
 SOLVENT CDCl3  
 NS 16  
 DS 4  
 SWH 64102.563 Hz  
 FIDRES 0.978127 Hz  
 AQ 0.5111808 sec  
 RG 203.57  
 DW 7.800 usec  
 DE 6.50 usec  
 TE 295.8 K  
 D1 2.0000000 sec  
 D11 0.03000000 sec  
 TD0 1

==== CHANNEL f1 =====  
 SFO1 161.9674942 MHz  
 NUC1 31P  
 P1 14.25 usec  
 PLW1 15.00000000 W

==== CHANNEL f2 =====  
 SFO2 400.1316005 MHz  
 NUC2 1H  
 CPDPRG{2 waltz16  
 PCPD2 90.00 usec  
 PLW2 10.00000000 W  
 PLW12 0.31604999 W  
 PLW13 0.25600001 W

F2 - Processing parameters  
 SI 32768  
 SF 161.9755930 MHz  
 WDW EM  
 SSB 0  
 LB 1.00 Hz  
 GB 0  
 PC 1.40

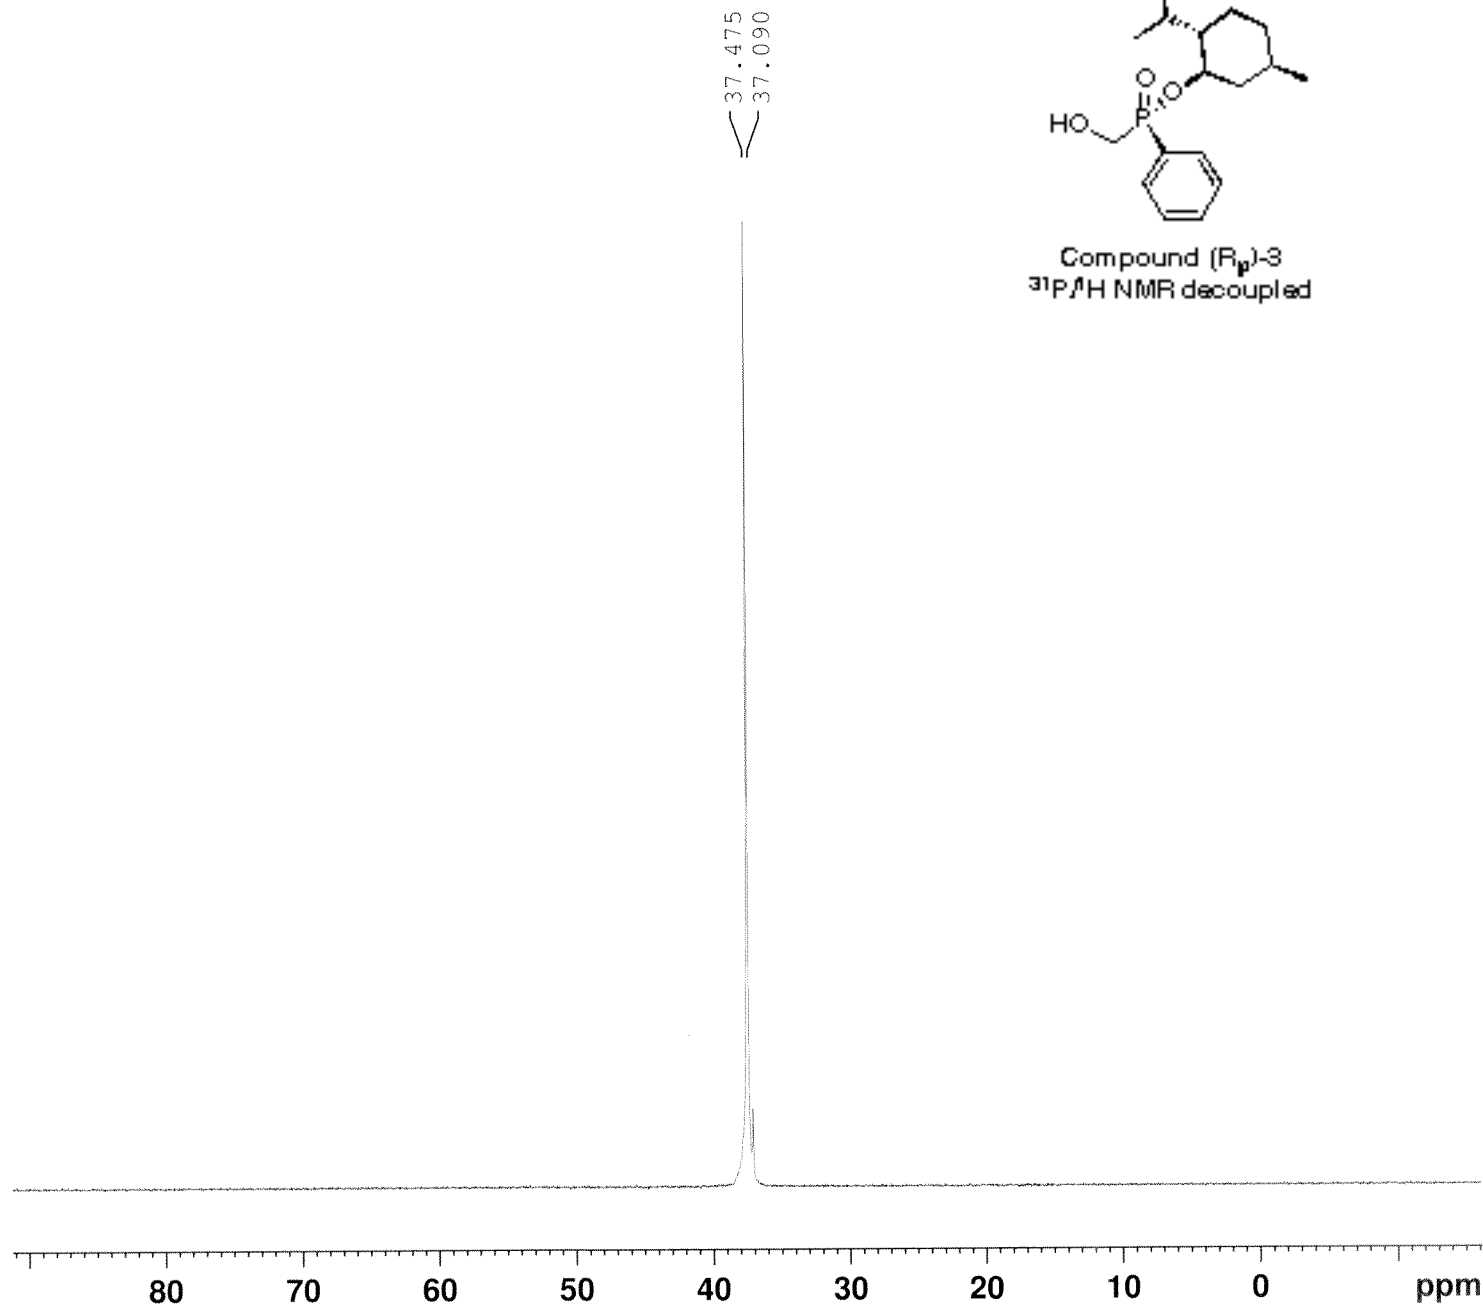

97.16  
 2.84

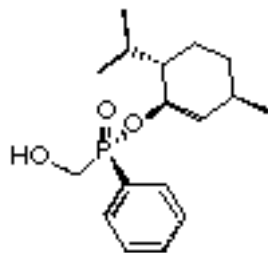

Compound (Rp)-3  
<sup>31</sup>P/<sup>1</sup>H NMR coupled

Current Data Parameters  
 NAME OB 1438 pure  
 EXPNO 2  
 PROCNO 1

F2 - Acquisition Parameters  
 Date\_ 20140424  
 Time 17.05  
 INSTRUM spect  
 PROBHD 5 mm PABBO BB/  
 PULPROG zg30  
 TD 65536  
 SOLVENT CDCl3  
 NS 32  
 DS 4  
 SWH 64102.563 Hz  
 FIDRES 0.978127 Hz  
 AQ 0.5111808 sec  
 RG 203.57  
 DW 7.800 usec  
 DE 6.50 usec  
 TE 295.2 K  
 D1 2.00000000 sec  
 TD0 1

==== CHANNEL f1 =====  
 SFO1 161.9674942 MHz  
 NUC1 31P  
 P1 14.25 usec  
 PLW1 15.00000000 W

F2 - Processing parameters  
 SI 32768  
 SF 161.9755930 MHz  
 WDW EM  
 SSB 0  
 LB 1.00 Hz  
 GB 0  
 PC 1.40

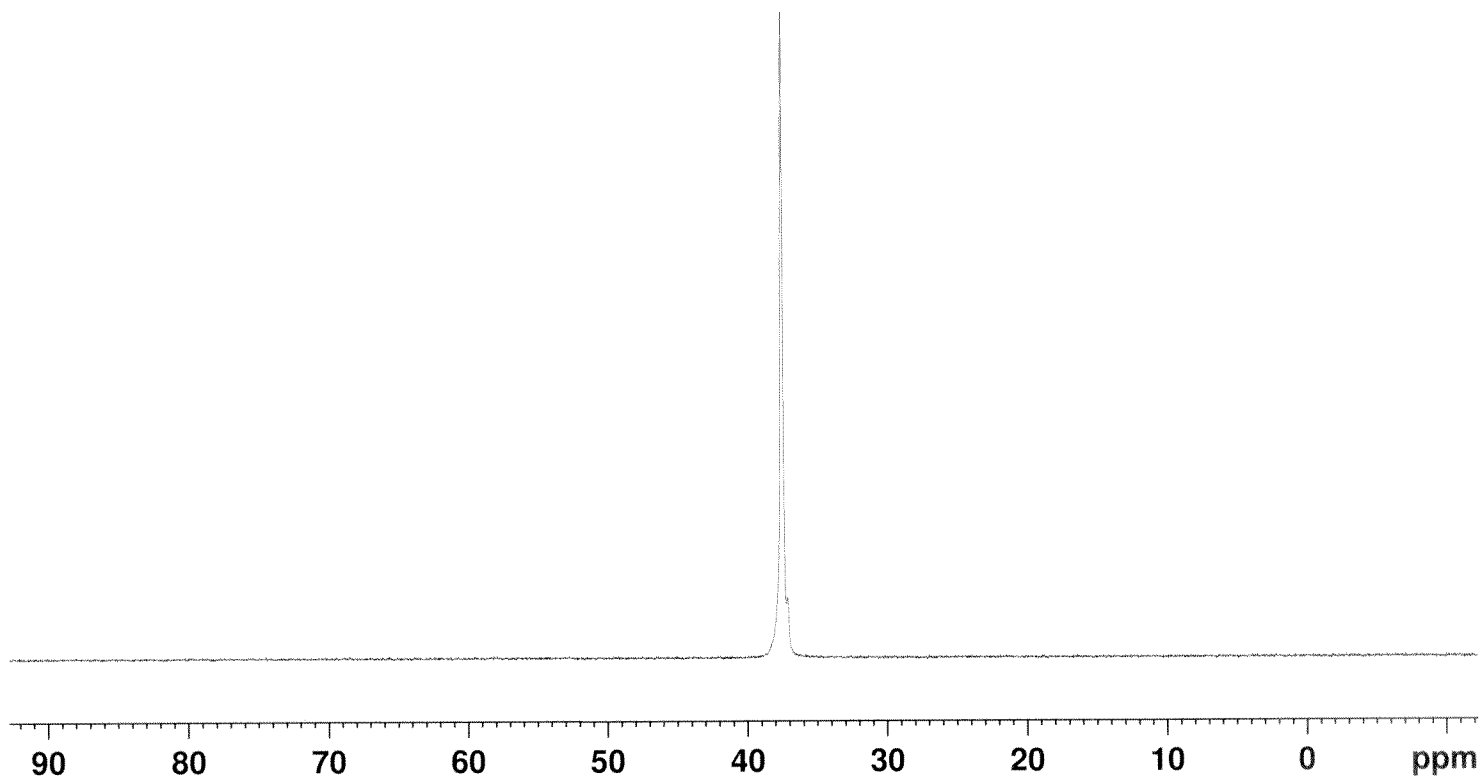

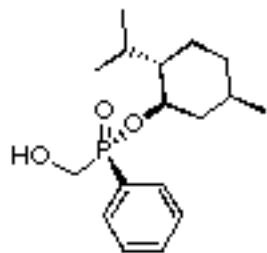

Compound (Rp)-3  
<sup>1</sup>H NMR

Current Data Parameters  
 NAME OB 1387 after precipitation  
 EXPNO 3  
 PROCNO 1

F2 - Acquisition Parameters  
 Date\_ 20140328  
 Time 14.26  
 INSTRUM spect  
 PROBHD 5 mm PABBO BB/  
 PULPROG zg30  
 TD 65536  
 SOLVENT CDCl3  
 NS 16  
 DS 2  
 SWH 8012.820 Hz  
 FIDRES 0.122266 Hz  
 AQ 4.089465 sec  
 RG 66.4  
 DW 62.400 usec  
 DE 6.50 usec  
 TE 297.1 K  
 D1 1.0000000 sec  
 TDO 1

==== CHANNEL f1 =====  
 SFO1 400.1324710 MHz  
 NUC1 1H  
 P1 10.00 usec  
 PLW1 25.00300026 W

F2 - Processing parameters  
 SI 65536  
 SF 400.1300000 MHz  
 WDW EM  
 SSB 0  
 LB 0.30 Hz  
 GB 0  
 PC 1.00

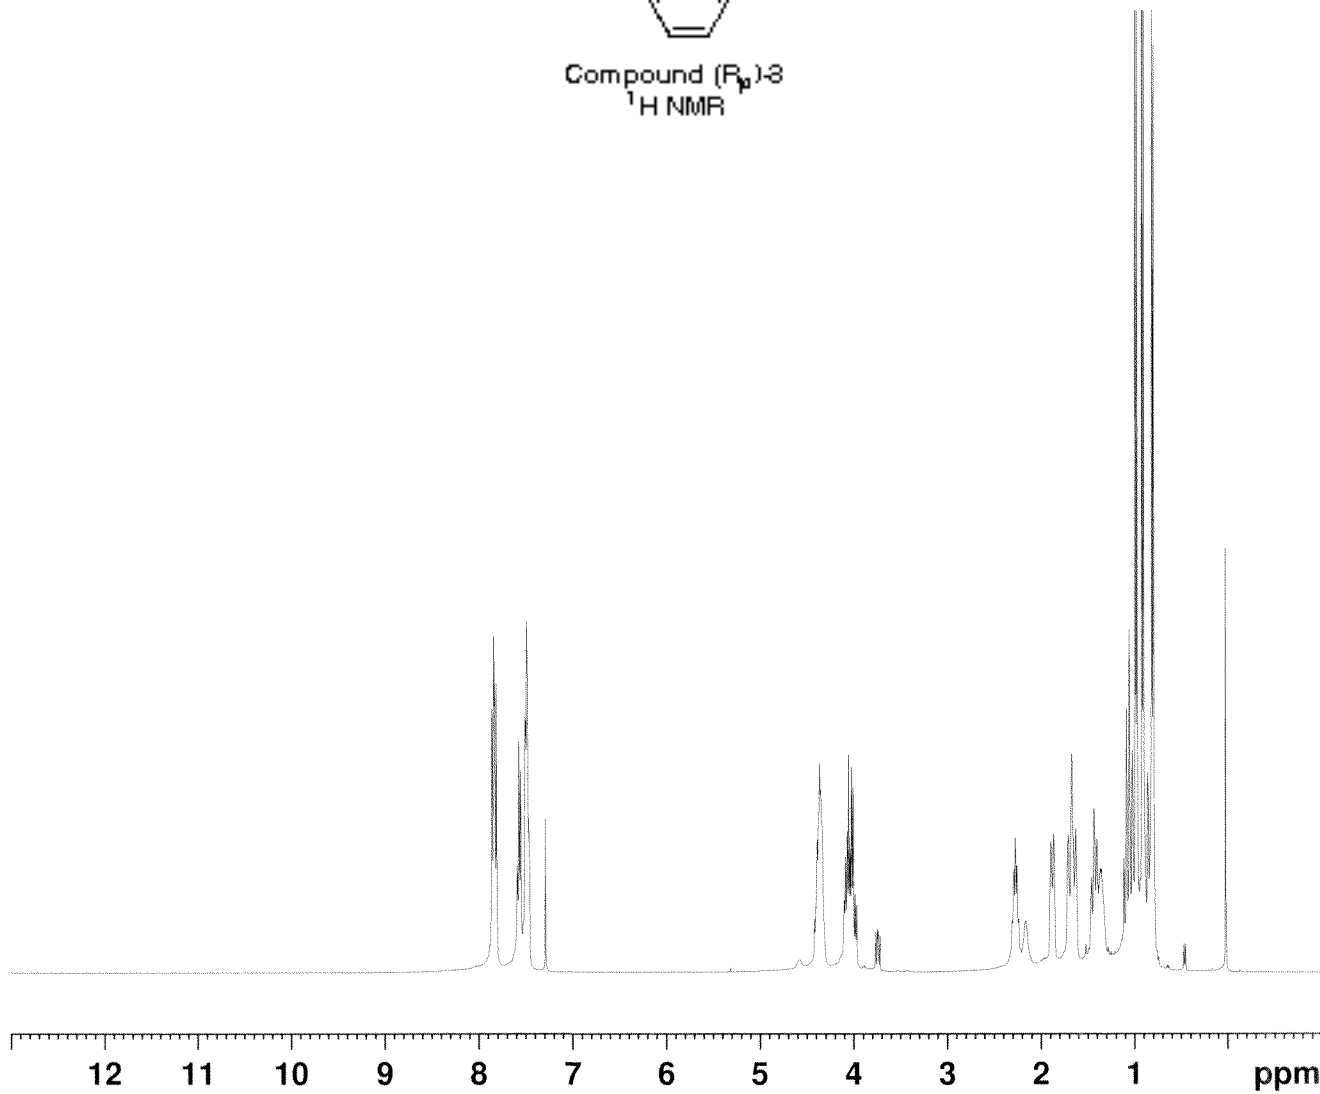

2.00  
 2.94

1.87  
 2.06

1.49  
 1.04  
 2.11  
 2.32  
 11.77  
 0.08

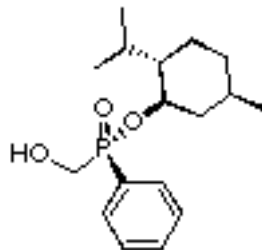

Compound (Rp)-8  
<sup>13</sup>C NMR

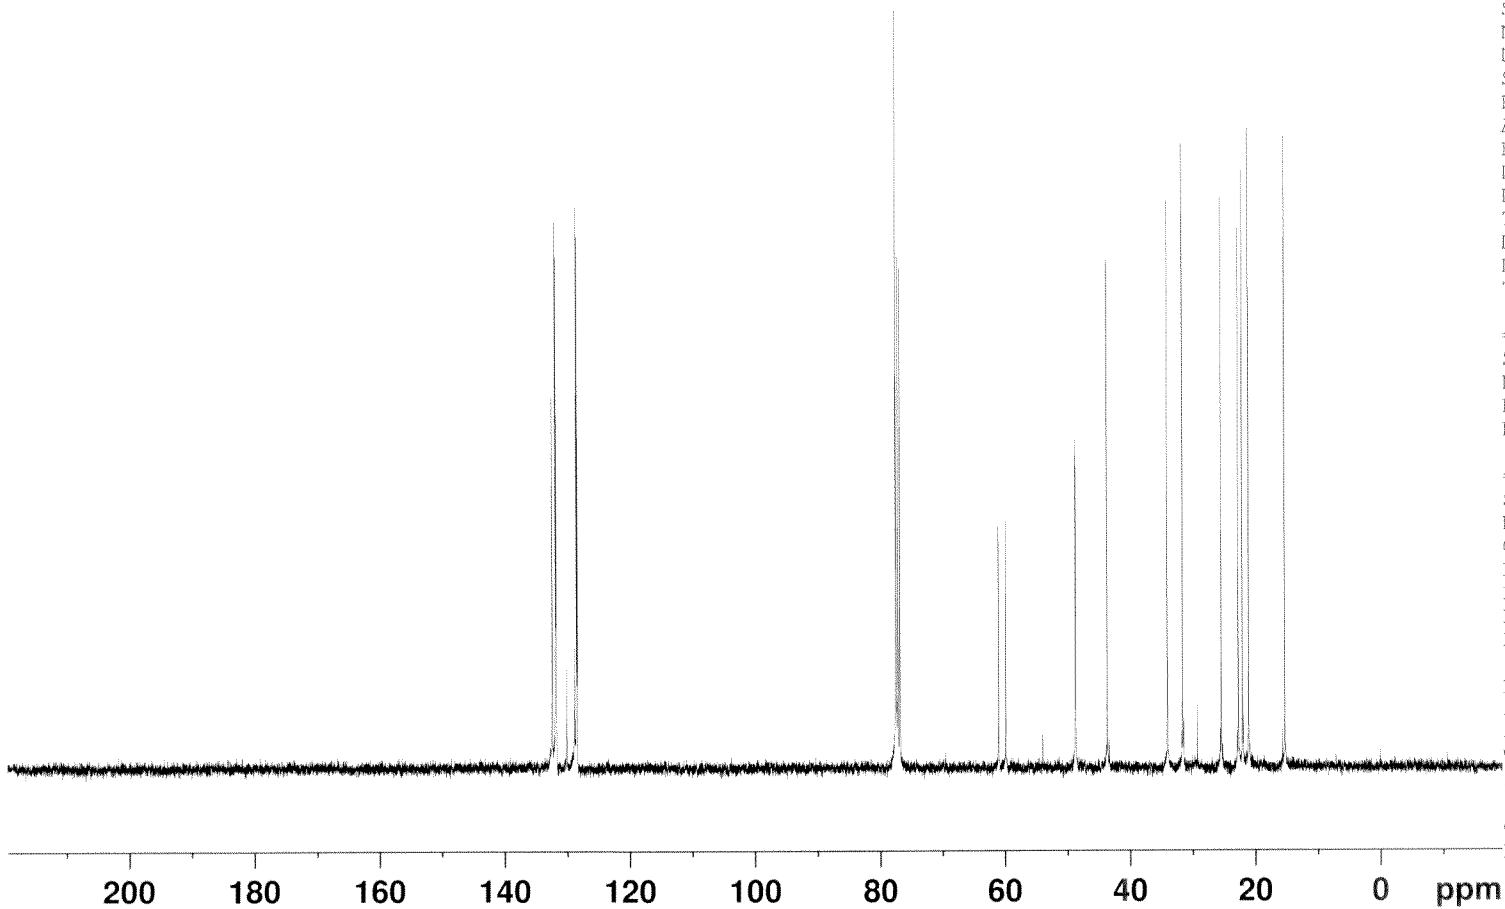

Current Data Parameters  
 NAME OB 1438 pure  
 EXPNO 4  
 PROCNO 1

F2 - Acquisition Parameters  
 Date\_ 20140424  
 Time 17.01  
 INSTRUM spect  
 PROBHD 5 mm PABBO BB/  
 PULPROG zgpg30  
 TD 65536  
 SOLVENT CDCl3  
 NS 300  
 DS 4  
 SWH 24038.461 Hz  
 FIDRES 0.366798 Hz  
 AQ 1.3631488 sec  
 RG 203.57  
 DW 20.800 usec  
 DE 6.50 usec  
 TE 296.1 K  
 D1 2.00000000 sec  
 D11 0.03000000 sec  
 TD0 1

==== CHANNEL f1 =====  
 SFO1 100.6228293 MHz  
 NUC1 13C  
 P1 10.00 usec  
 PLW1 45.00000000 W

==== CHANNEL f2 =====  
 SFO2 400.1316005 MHz  
 NUC2 1H  
 CPDPRG[2] waltz16  
 PCPD2 90.00 usec  
 PLW2 10.00000000 W  
 PLW12 0.31604999 W  
 PLW13 0.25600001 W

F2 - Processing parameters  
 SI 32768  
 SF 100.6127690 MHz  
 WDW EM  
 SSB 0  
 LB 1.00 Hz  
 GB 0  
 PC 1.40

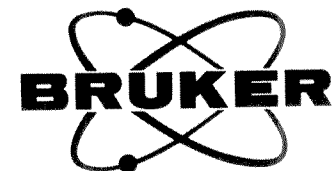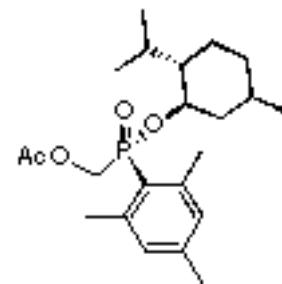

Compound (R<sub>p</sub>)-8a  
<sup>31</sup>P/<sup>1</sup>H NMR decoupled

Current Data Parameters  
NAME OB 184 after column  
EXPNO 1  
PROCNO 1

F2 - Acquisition Parameters  
Date\_ 20141121  
Time\_ 9.22  
INSTRUM spect  
PROBHD 5 mm PABBO BB/  
PULPROG zgpg30  
TD 65536  
SOLVENT CDC13  
NS 16  
DS 4  
SWH 64102.563 Hz  
FIDRES 0.978127 Hz  
AQ 0.5111808 sec  
RG 203.57  
DW 7.800 usec  
DE 6.50 usec  
TE 296.6 K  
D1 2.0000000 sec  
D11 0.03000000 sec  
TDO 1

==== CHANNEL f1 =====  
SFO1 161.9674942 MHz  
NUC1 31P  
P1 14.25 usec  
PLW1 15.00000000 W

==== CHANNEL f2 =====  
SFO2 400.1316005 MHz  
NUC2 1H  
CPDPRG[2] waltz16  
PCPD2 90.00 usec  
PLW2 10.00000000 W  
PLW12 0.31604999 W  
PLW13 0.25600001 W

F2 - Processing parameters  
SI 32768  
SF 161.9755930 MHz  
WDW EM  
SSB 0  
LB 1.00 Hz  
GB 0  
PC 1.40

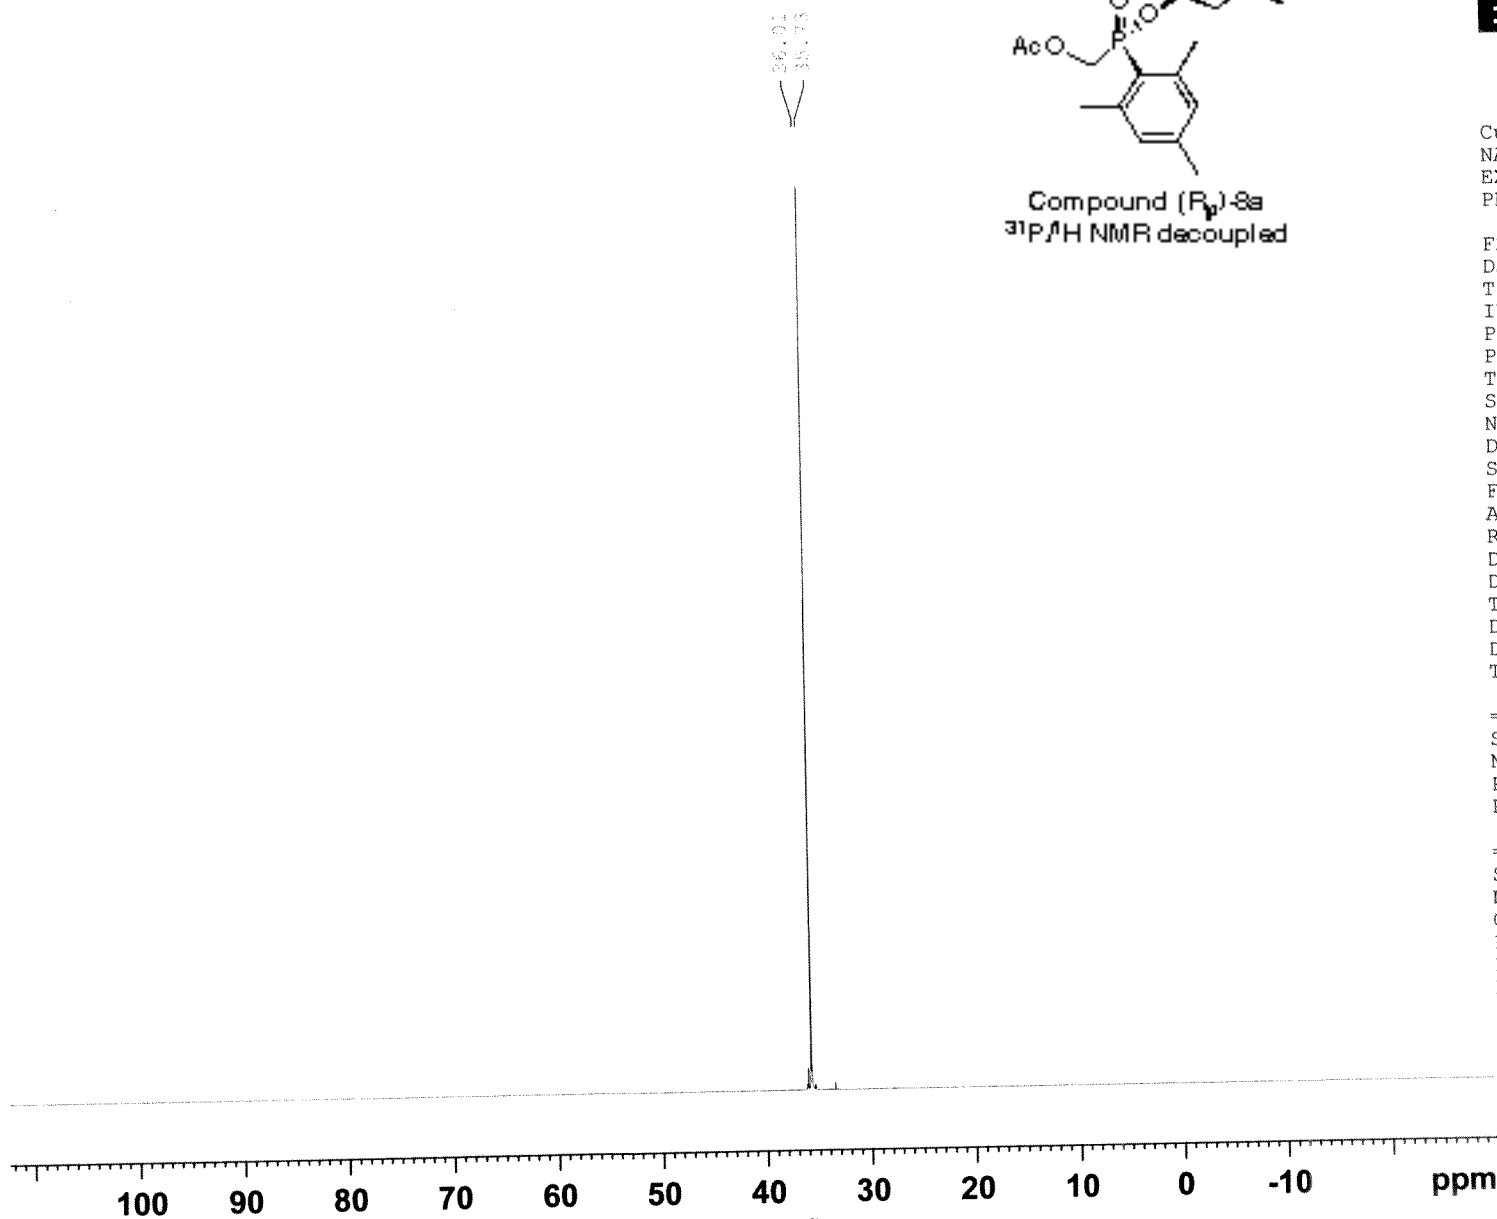

2.11  
97.89

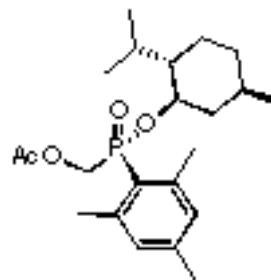

Compound (Rp)-8a  
<sup>31</sup>P/<sup>1</sup>H NMR coupled

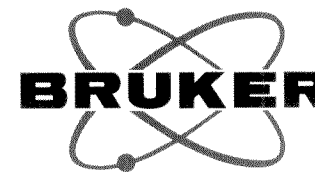

Current Data Parameters  
 NAME OB 1843 after column  
 EXPNO 2  
 PROCNO 1

F2 - Acquisition Parameters  
 Date 20141121  
 Time 9.24  
 INSTRUM spect  
 PROBHD 5 mm PABBO BB/  
 PULPROG zg30  
 TD 65536  
 SOLVENT CDC13  
 NS 32  
 DS 4  
 SWH 64102.563 Hz  
 FIDRES 0.978127 Hz  
 AQ 0.5111808 sec  
 RG 203.57  
 DW 7.800 usec  
 DE 6.50 usec  
 TE 296.1 K  
 D1 2.00000000 sec  
 TDO 1

==== CHANNEL f1 =====  
 SFO1 161.9674942 MHz  
 NUC1 31P  
 P1 14.25 usec  
 PLW1 15.00000000 W

F2 - Processing parameters  
 SI 32768  
 SF 161.9755930 MHz  
 WDW EM  
 SSB 0  
 LB 1.00 Hz  
 GB 0  
 PC 1.40

35.02  
 35.04

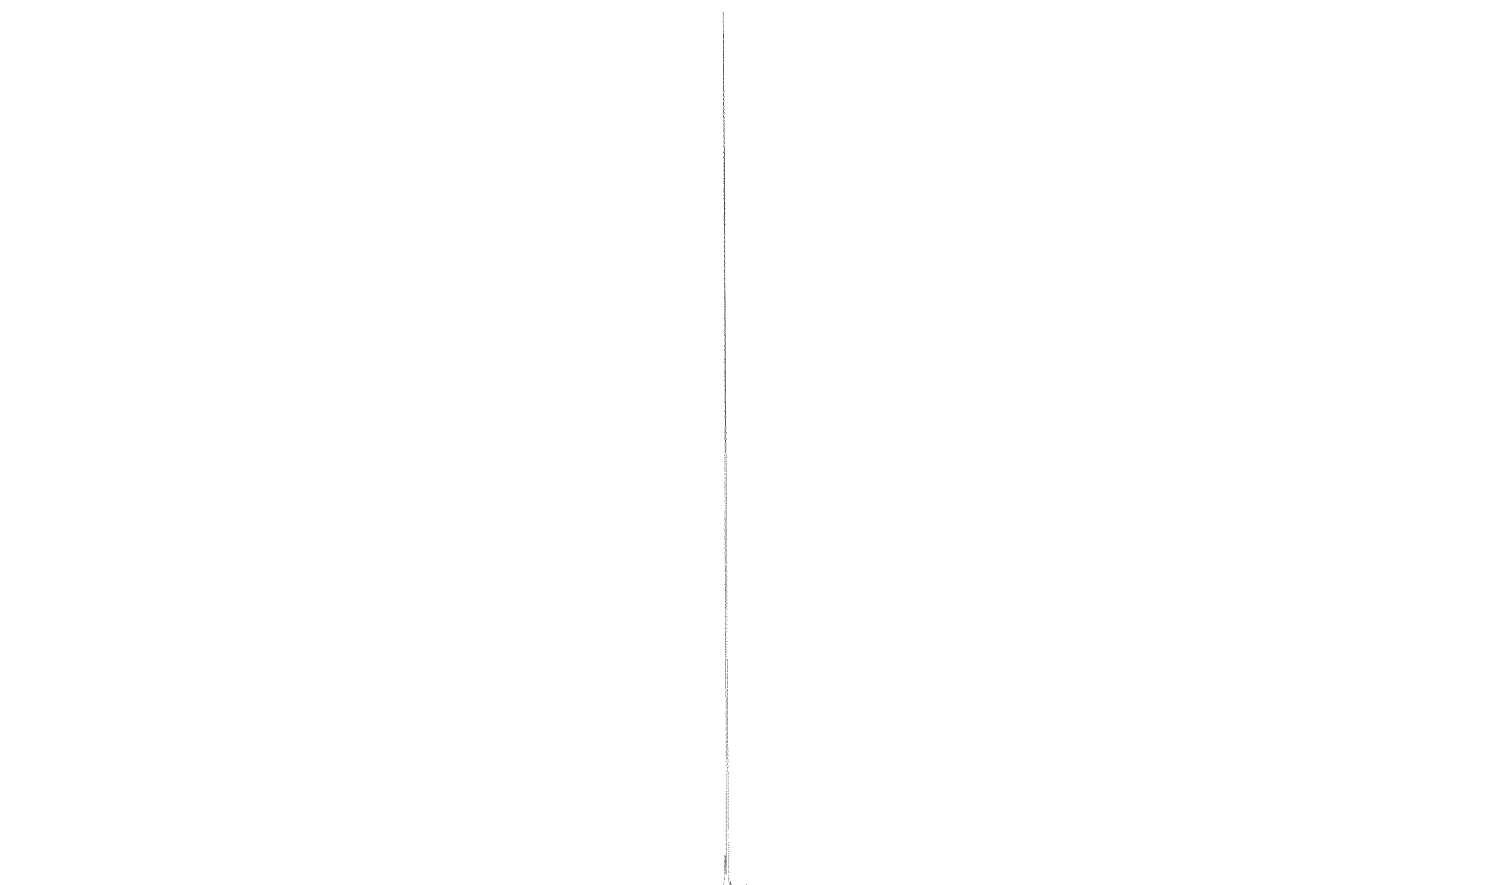

110 100 90 80 70 60 50 40 30 20 10 0 -10 -20 -30 -40 ppm



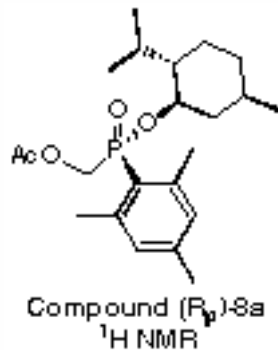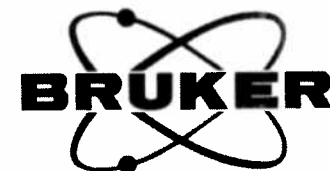

Current Data Parameters  
 NAME OB 1843 after column  
 EXPNO 3  
 PROCNO 1

F2 - Acquisition Parameters  
 Date\_ 20141121  
 Time 9.26  
 INSTRUM spect  
 PROBHD 5 mm PABBO BB/  
 PULPROG zg30  
 TD 65536  
 SOLVENT CDC13  
 NS 10  
 DS 2  
 SWH 8012.820 Hz  
 FIDRES 0.122266 Hz  
 AQ 4.0894465 sec  
 RG 8.79  
 DW 62.400 usec  
 DE 6.50 usec  
 TE 296.0 K  
 D1 1.00000000 sec  
 TD0 1

==== CHANNEL f1 =====  
 SFO1 400.1324710 MHz  
 NUC1 1H  
 P1 10.00 usec  
 PLW1 25.00300026 W

F2 - Processing parameters  
 SI 65536  
 SF 400.1300000 MHz  
 WDW EM  
 SSB 0  
 LB 0.30 Hz  
 GB 0  
 PC 1.00

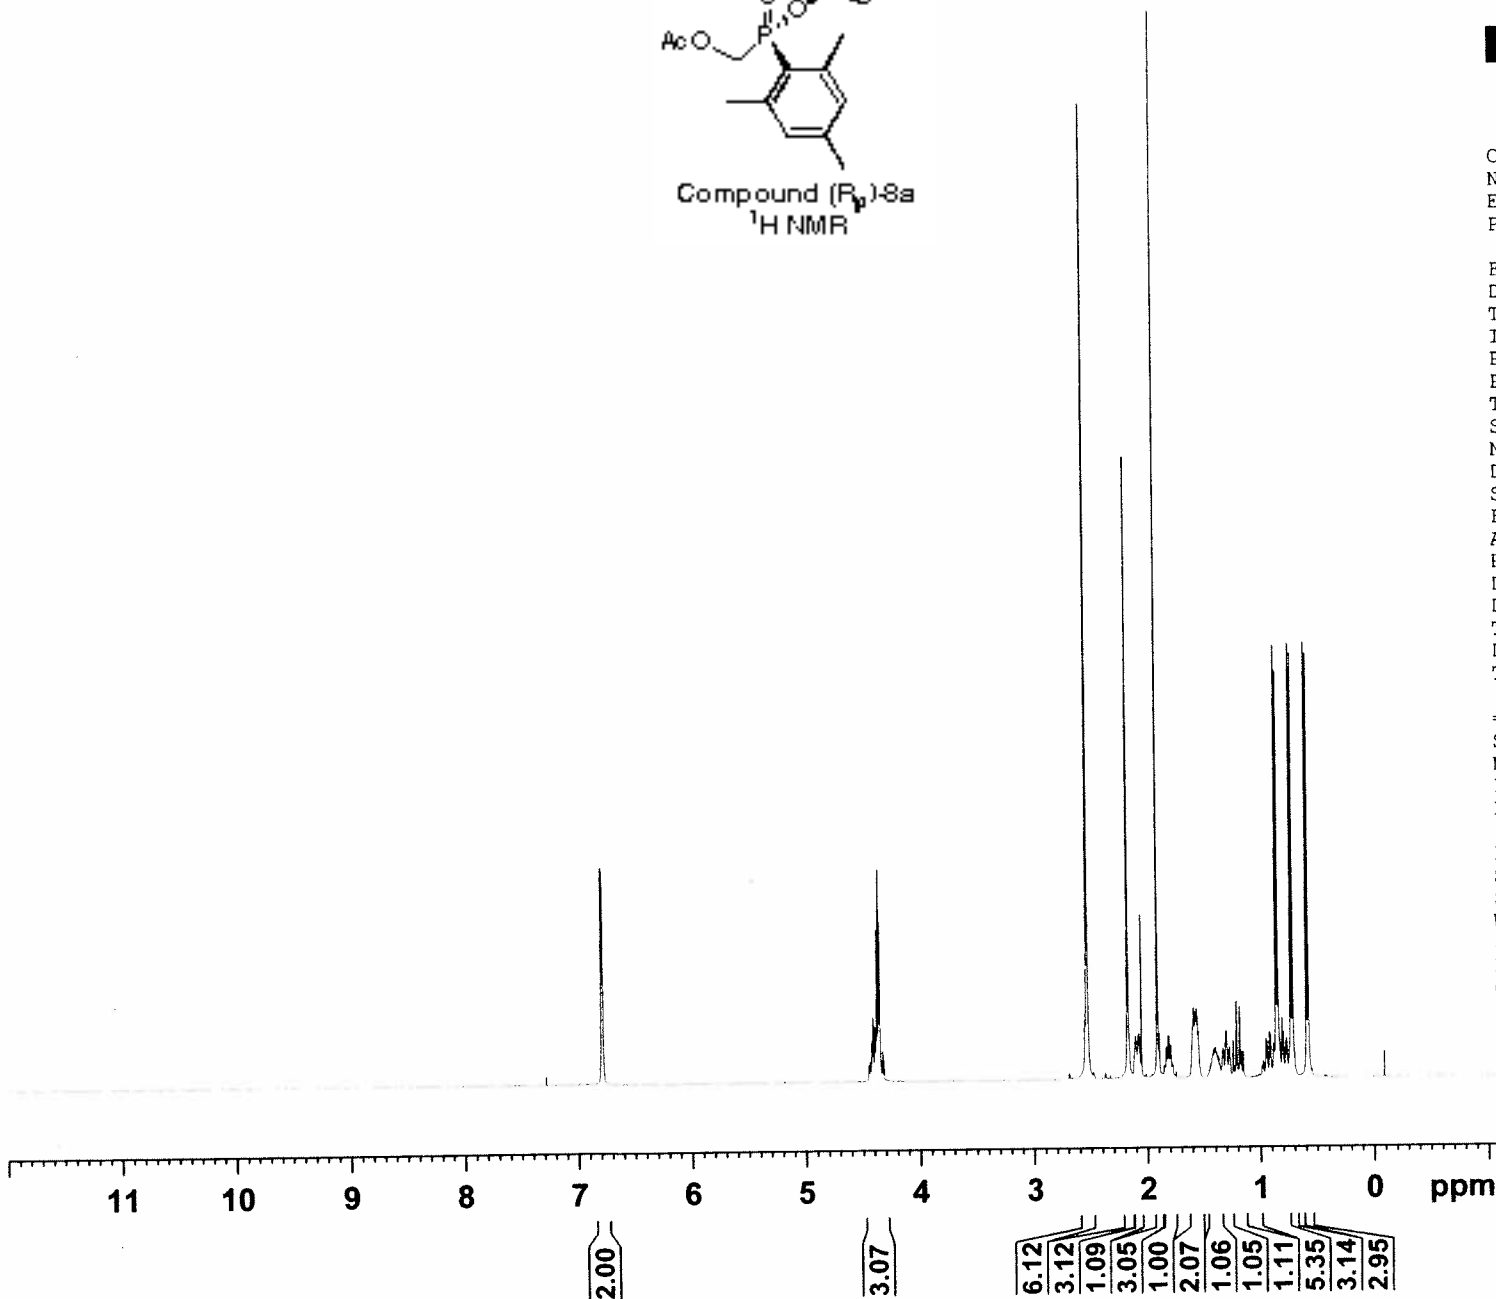

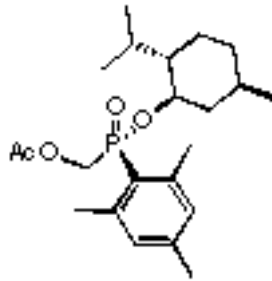

Compound (Rp)-8a  
<sup>13</sup>C NMR

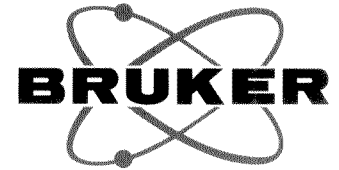

Current Data Parameters  
 NAME OB 1843 after column  
 EXPNO 4  
 PROCNO 1

F2 - Acquisition Parameters  
 Date\_ 20141121  
 Time 9.43  
 INSTRUM spect  
 PROBHD 5 mm PABBO BB/  
 PULPROG zgpg30  
 TD 65536  
 SOLVENT CDC13  
 NS 255  
 DS 4  
 SWH 24038.461 Hz  
 FIDRES 0.366798 Hz  
 AQ 1.3631488 sec  
 RG 203.57  
 DW 20.800 usec  
 DE 6.50 usec  
 TE 297.3 K  
 D1 2.00000000 sec  
 D11 0.03000000 sec  
 TD0 1

==== CHANNEL f1 =====  
 SFO1 100.6228293 MHz  
 NUC1 13C  
 P1 10.00 usec  
 PLW1 45.00000000 W

==== CHANNEL f2 =====  
 SFO2 400.1316005 MHz  
 NUC2 1H  
 CPDPRG[2] waltz16  
 PCPD2 90.00 usec  
 PLW2 10.00000000 W  
 PLW12 0.31604999 W  
 PLW13 0.25600001 W

F2 - Processing parameters  
 SI 32768  
 SF 100.6127685 MHz  
 WDW EM  
 SSB 0  
 LB 1.00 Hz  
 GB 0  
 PC 1.40

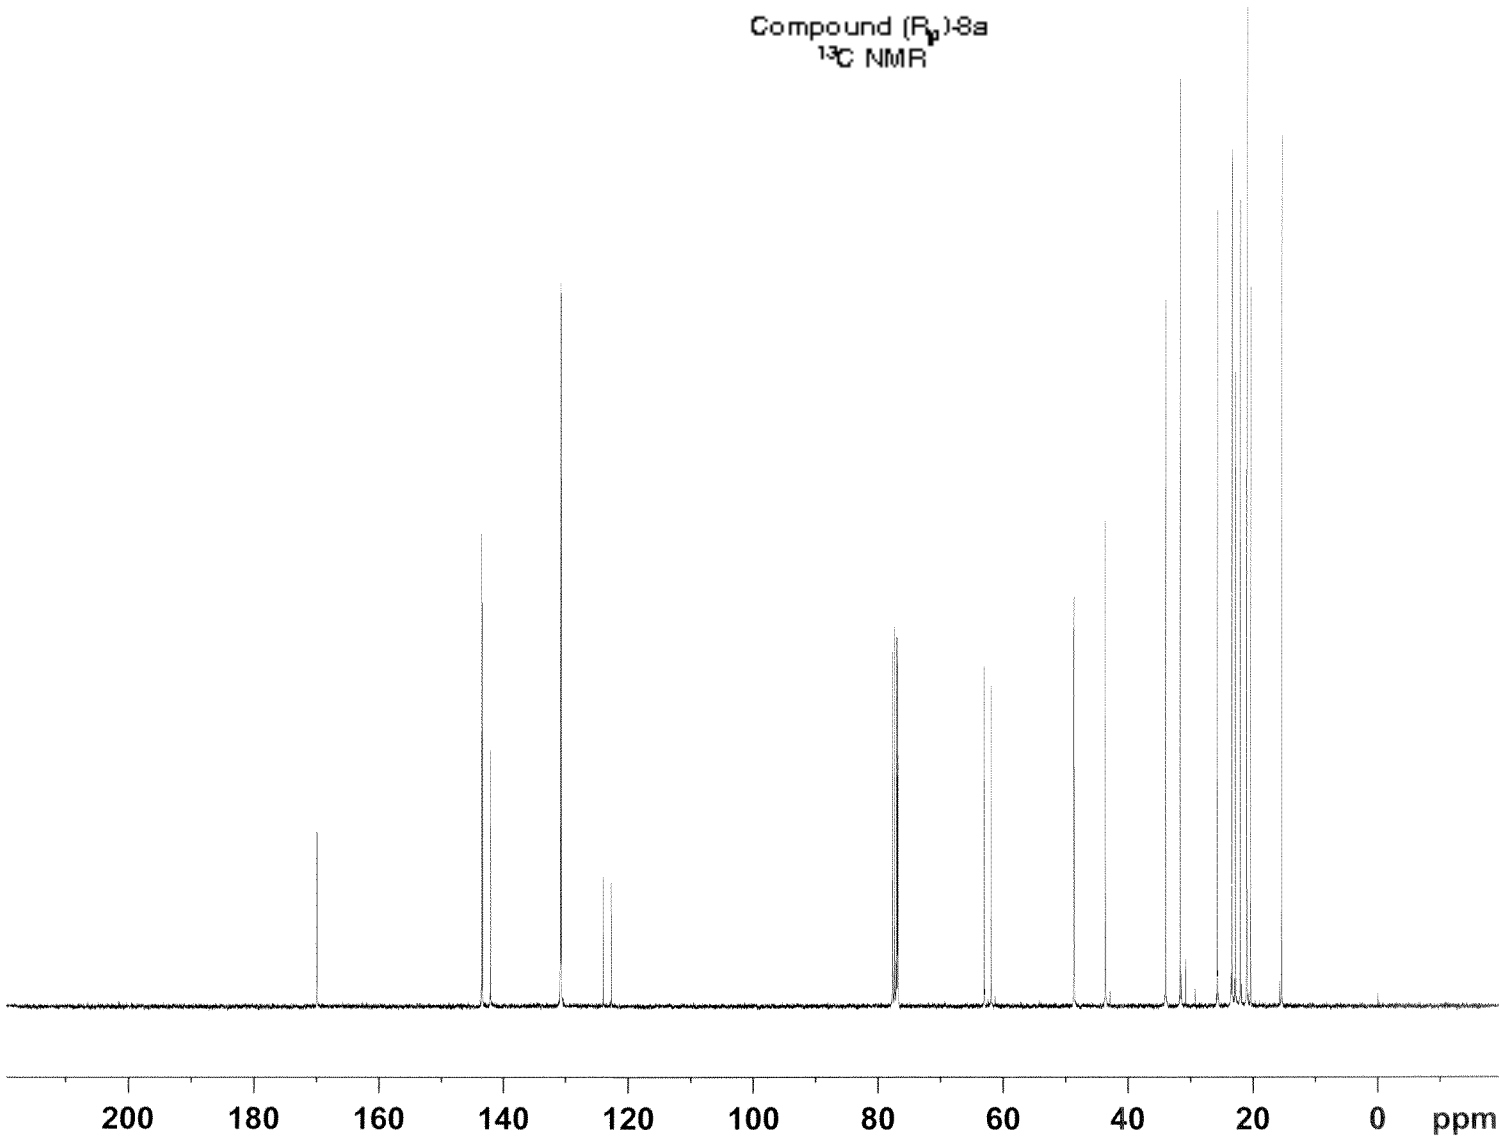

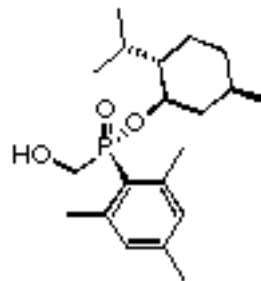

Compound (R<sub>p</sub>)-8b  
<sup>31</sup>P/<sup>1</sup>H NMR decoupled

Current Data Parameters  
 NAME OB 1857 after column  
 EXPNO 1  
 PROCNO 1

F2 - Acquisition Parameters  
 Date\_ 20141203  
 Time 17.06  
 INSTRUM spect  
 PROBHD 5 mm PABBO BB/  
 PULPROG zgpg30  
 TD 65536  
 SOLVENT CDC13  
 NS 16  
 DS 4  
 SWH 64102.563 Hz  
 FIDRES 0.978127 Hz  
 AQ 0.5111808 sec  
 RG 203.57  
 DW 7.800 usec  
 DE 6.50 usec  
 TE 298.0 K  
 D1 2.00000000 sec  
 D11 0.03000000 sec  
 TD0 1

==== CHANNEL f1 =====  
 SFO1 161.9674942 MHz  
 NUC1 31P  
 P1 14.25 usec  
 PLW1 15.00000000 W

==== CHANNEL f2 =====  
 SFO2 400.1316005 MHz  
 NUC2 1H  
 CPDPRG[2] waltz16  
 PCPD2 90.00 usec  
 PLW2 10.00000000 W  
 PLW12 0.31604999 W  
 PLW13 0.25600001 W

F2 - Processing parameters  
 SI 32768  
 SF 161.9755930 MHz  
 WDW EM  
 SSB 0  
 LB 1.00 Hz  
 GB 0  
 PC 1.40

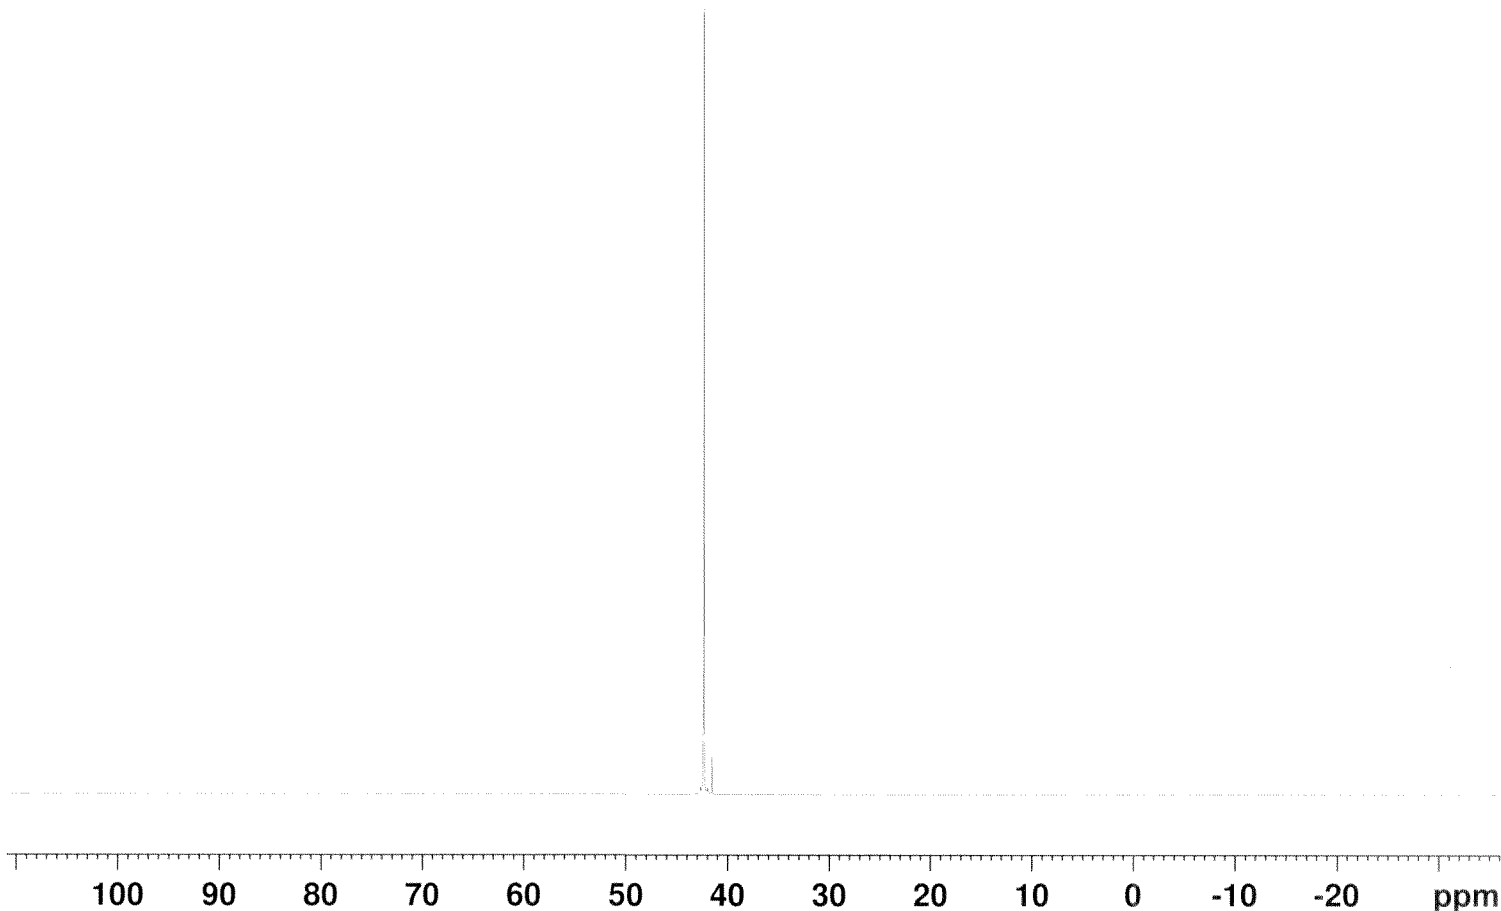

96.98  
 3.02

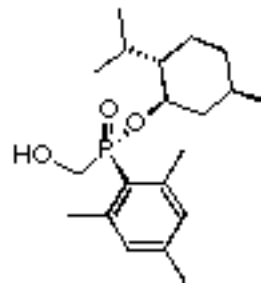

Compound (R<sub>p</sub>)-8b  
<sup>31</sup>P/<sup>1</sup>H NMR coupled

Current Data Parameters  
 NAME OB 1857 after column  
 EXPNO 2  
 PROCNO 1

F2 - Acquisition Parameters  
 Date\_ 20141203  
 Time 17.08  
 INSTRUM spect  
 PROBHD 5 mm PABBO BB/  
 PULPROG zg30  
 TD 65536  
 SOLVENT CDC13  
 NS 32  
 DS 4  
 SWH 64102.563 Hz  
 FIDRES 0.978127 Hz  
 AQ 0.5111808 sec  
 RG 203.57  
 DW 7.800 usec  
 DE 6.50 usec  
 TE 297.7 K  
 D1 2.0000000 sec  
 TD0 1

===== CHANNEL f1 =====  
 SFO1 161.9674942 MHz  
 NUC1 31P  
 P1 14.25 usec  
 PLW1 15.0000000 W

F2 - Processing parameters  
 SI 32768  
 SF 161.9755930 MHz  
 WDW EM  
 SSB 0  
 LB 1.00 Hz  
 GB 0  
 PC 1.40

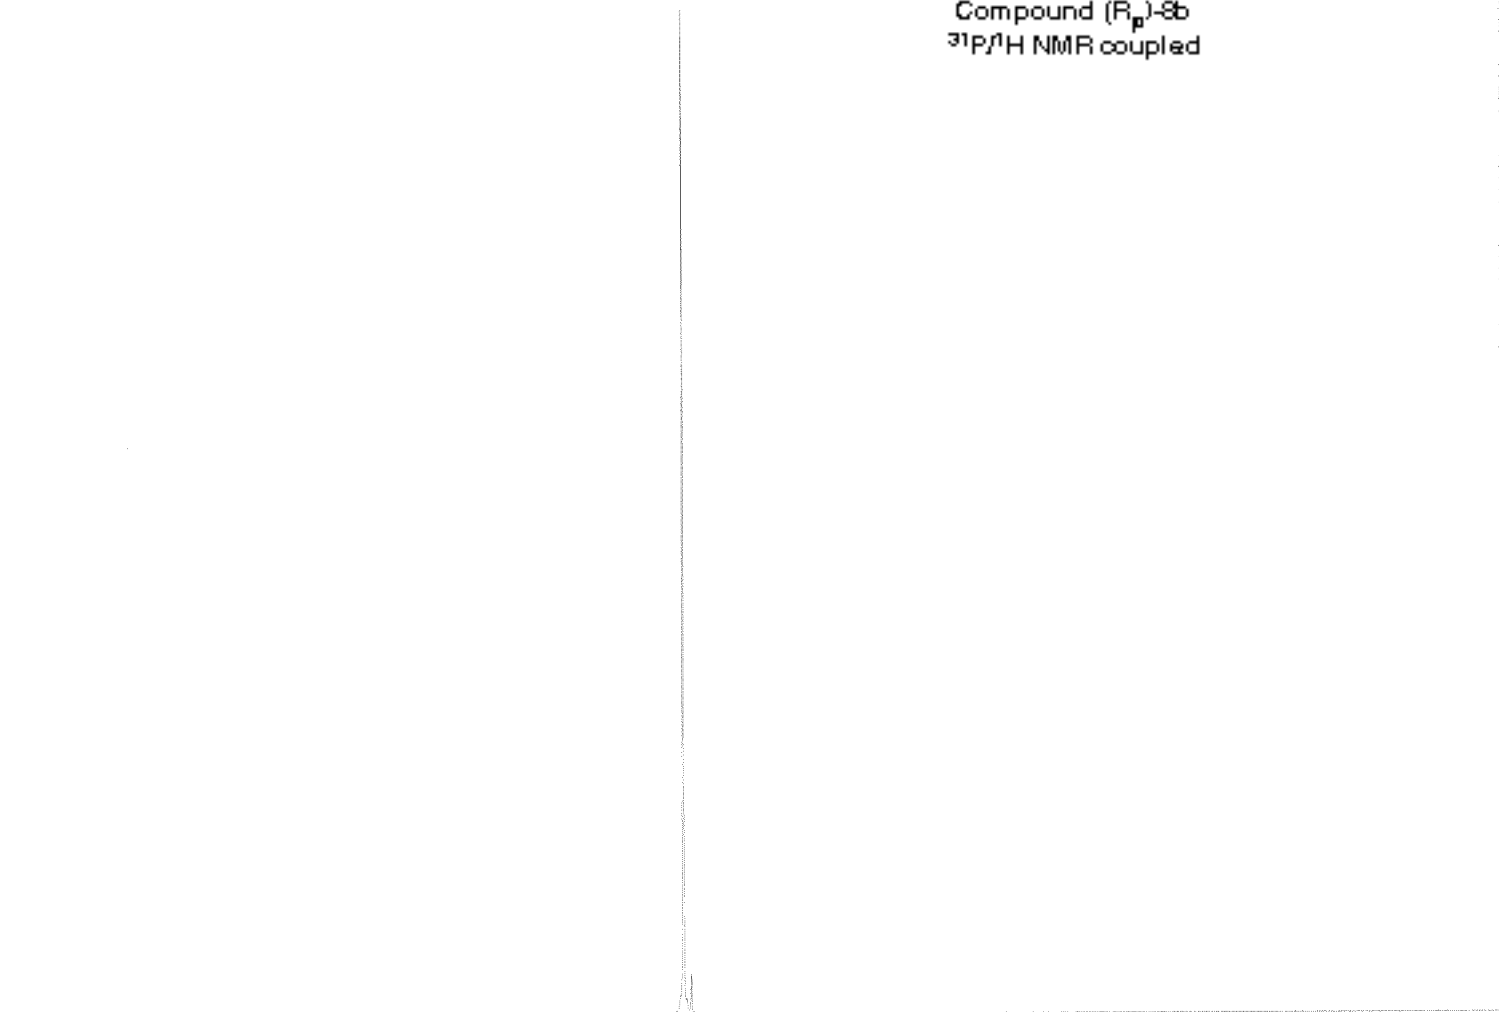

100 90 80 70 60 50 40 30 20 10 0 -10 -20 -30 ppm

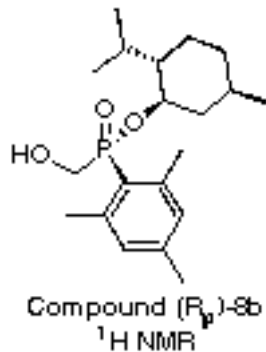

Current Data Parameters  
 NAME OB 1857 after column  
 EXPNO 3  
 PROCNO 1

F2 - Acquisition Parameters  
 Date\_ 20141203  
 Time 17.10  
 INSTRUM spect  
 PROBHD 5 mm PABBO BB/  
 PULPROG zg30  
 TD 65536  
 SOLVENT CDC13  
 NS 7  
 DS 2  
 SWH 8012.820 Hz  
 FIDRES 0.122266 Hz  
 AQ 4.0894465 sec  
 RG 6.9  
 DW 62.400 usec  
 DE 6.50 usec  
 TE 297.6 K  
 D1 1.0000000 sec  
 TD0 1

==== CHANNEL f1 =====  
 SFO1 400.1324710 MHz  
 NUC1 1H  
 P1 10.00 usec  
 PLW1 25.00300026 W

F2 - Processing parameters  
 SI 65536  
 SF 400.1300000 MHz  
 WDW EM  
 SSB 0  
 LB 0.30 Hz  
 GB 0  
 PC 1.00

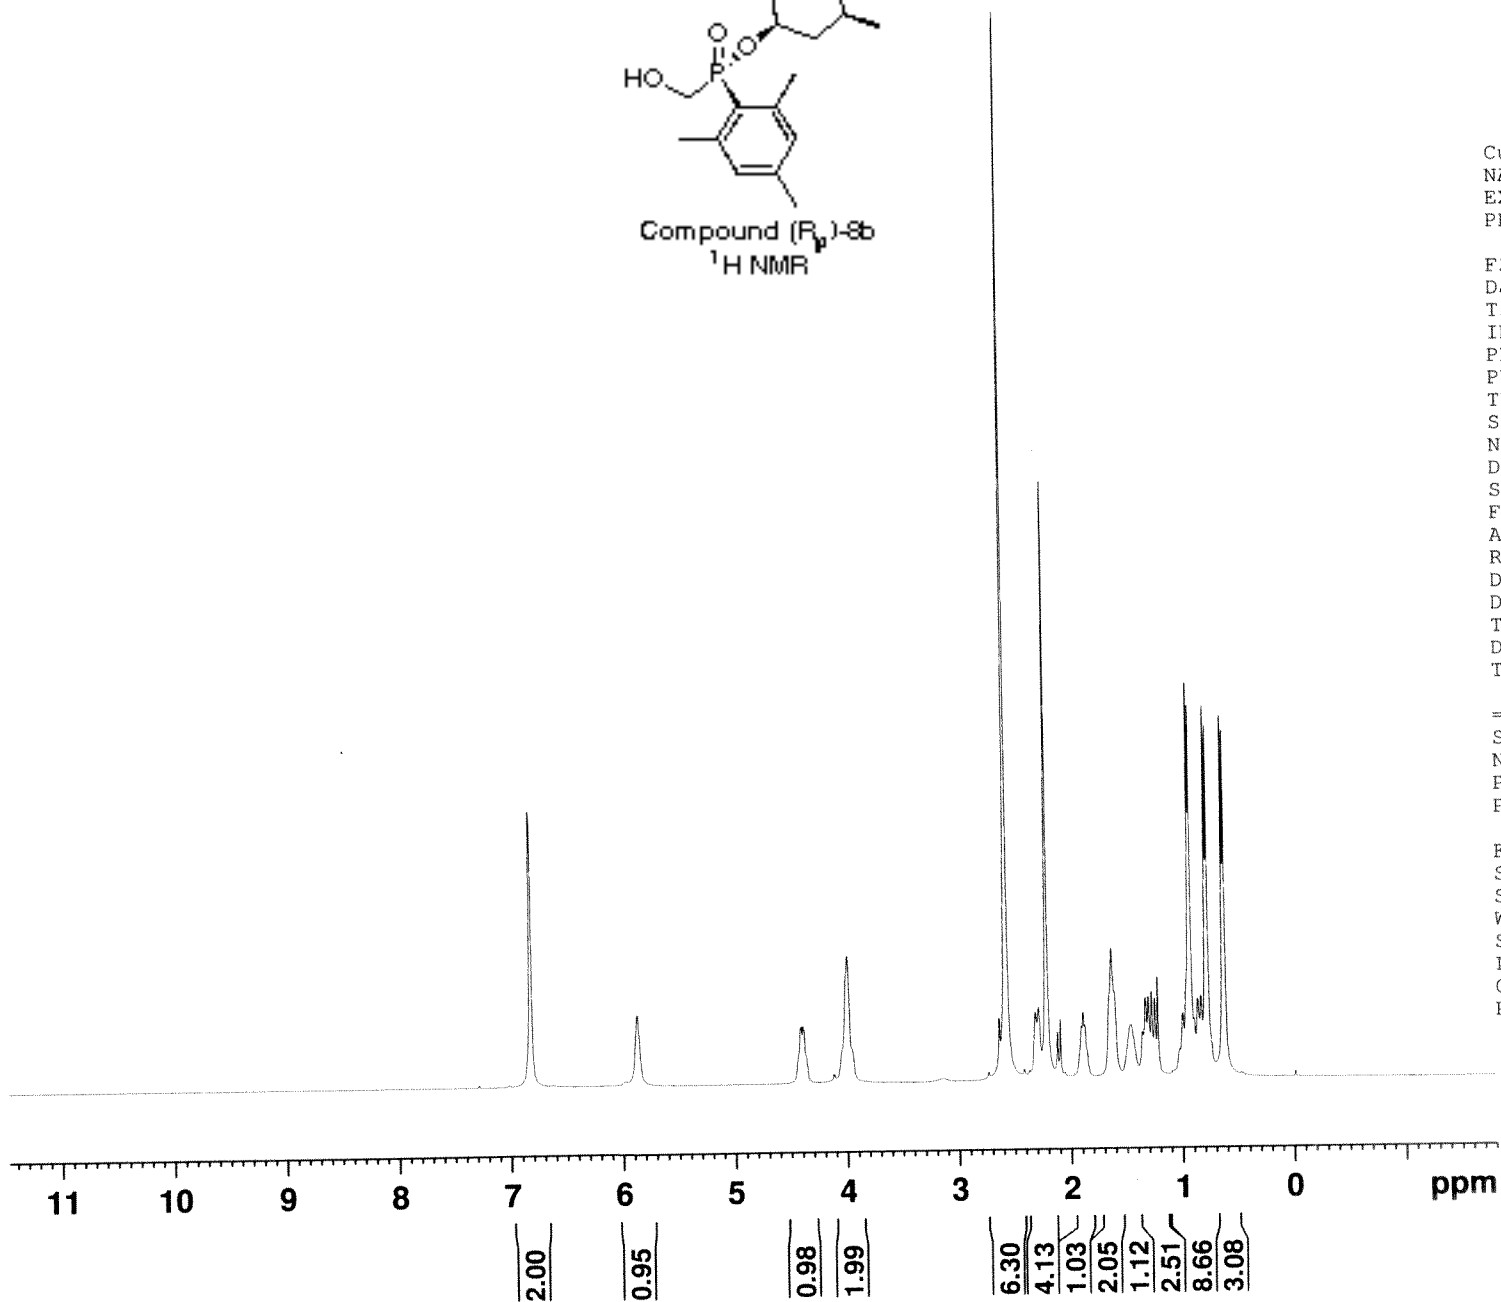

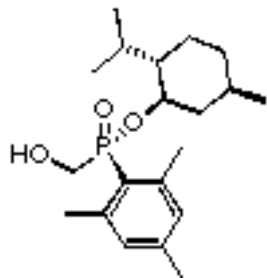

Compound (R<sub>p</sub>)-8b  
<sup>13</sup>C NMR

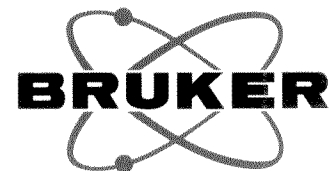

Current Data Parameters  
 NAME OB 1844 pure  
 EXPNO 4  
 PROCNO 1

F2 - Acquisition Parameters

Date\_ 20150306  
 Time\_ 17.58  
 INSTRUM spect  
 PROBHD 5 mm PABBO BB/  
 PULPROG zgpg30  
 TD 65536  
 SOLVENT CDCl3  
 NS 204  
 DS 4  
 SWH 24038.461 Hz  
 FIDRES 0.366798 Hz  
 AQ 1.3631488 sec  
 RG 203.57  
 DW 20.800 usec  
 DE 6.50 usec  
 TE 296.0 K  
 D1 2.00000000 sec  
 D11 0.03000000 sec  
 TD0 1

==== CHANNEL f1 =====  
 SFO1 100.6228293 MHz  
 NUC1 13C  
 P1 10.00 usec  
 PLW1 45.00000000 W

==== CHANNEL f2 =====  
 SFO2 400.1316005 MHz  
 NUC2 1H  
 CPDPRG[2] waltz16  
 PCPD2 90.00 usec  
 PLW2 10.00000000 W  
 PLW12 0.31604999 W  
 PLW13 0.25600001 W

F2 - Processing parameters

SI 32768  
 SF 100.6127685 MHz  
 WDW EM  
 SSB 0  
 LB 1.00 Hz  
 GB 0  
 PC 1.40

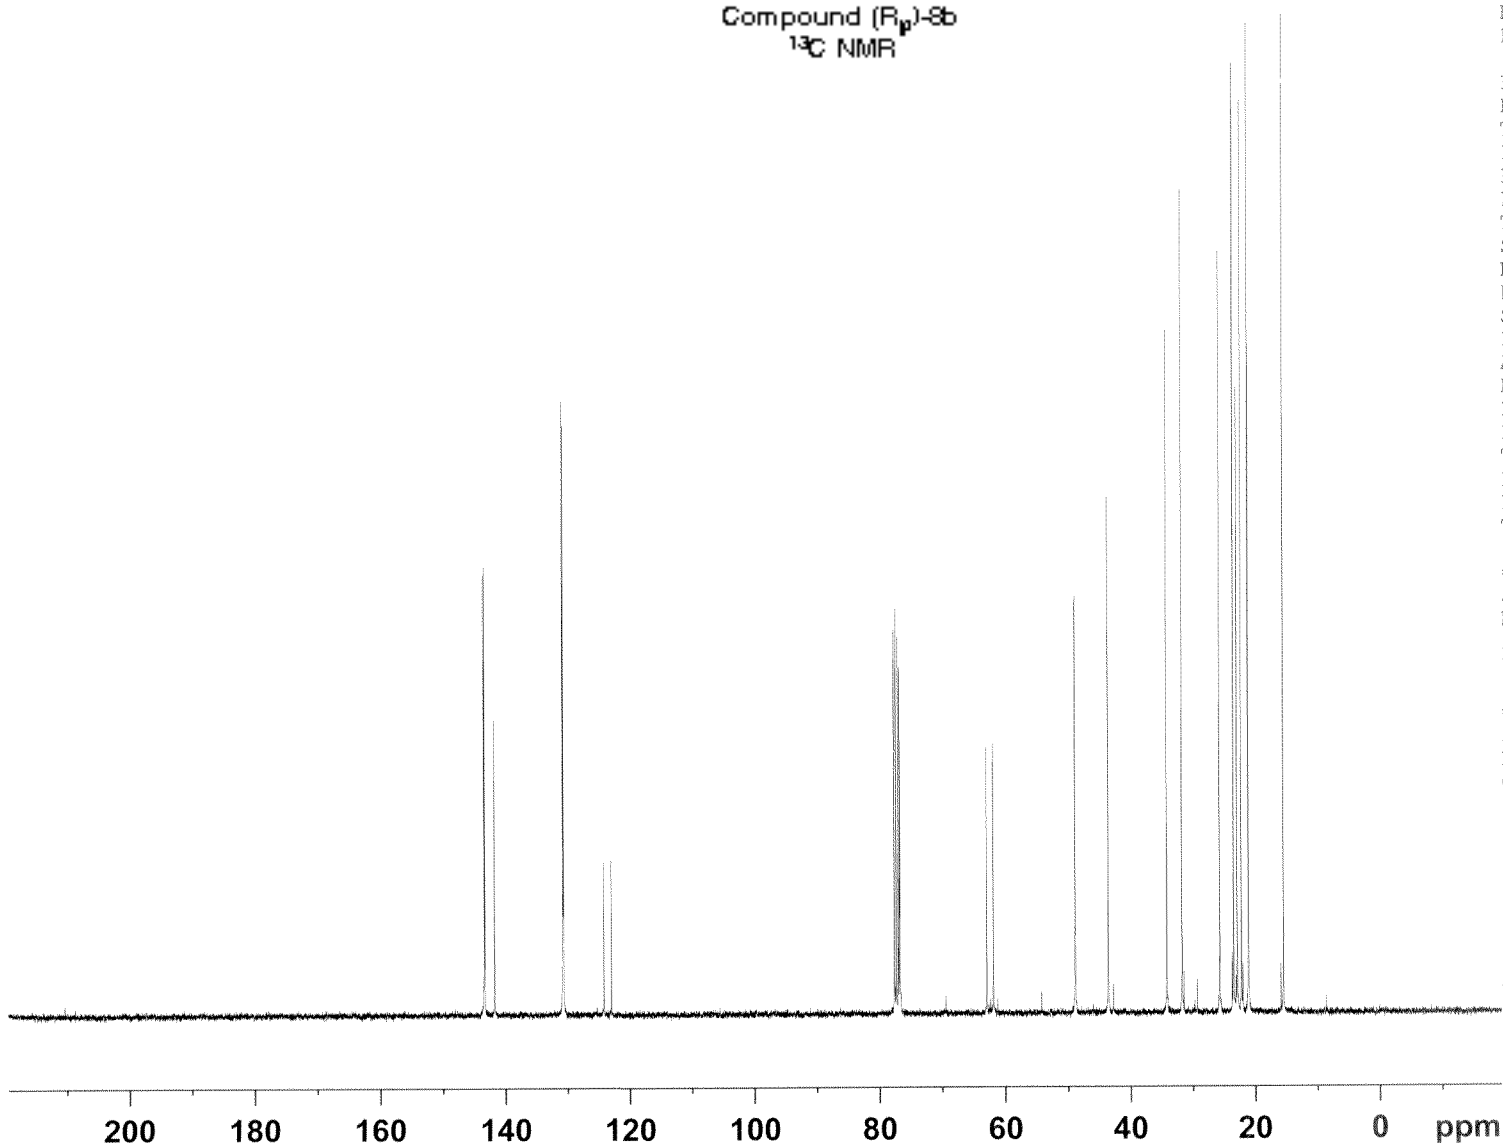

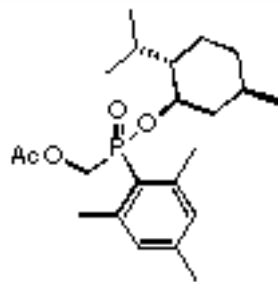

Compound 8a  
<sup>31</sup>P/<sup>1</sup>H NMR decoupled

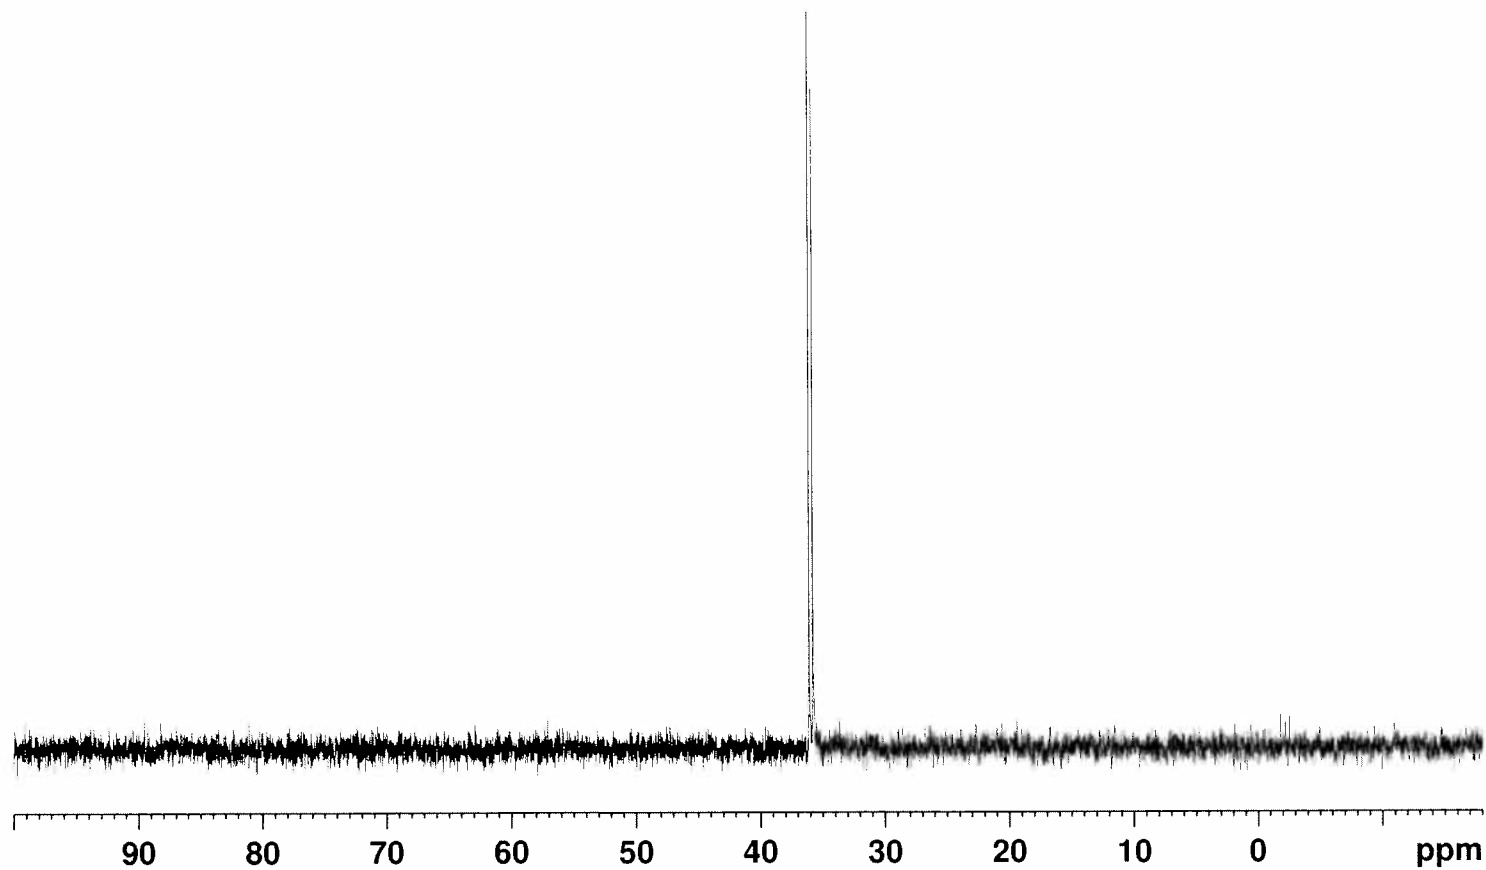

51.52  
 48.48

Current Data Parameters  
 NAME OB 1415  
 EXPNO 1  
 PROCNO 1

F2 - Acquisition Parameters  
 Date\_ 20140407  
 Time 16.55  
 INSTRUM spect  
 PROBHD 5 mm PABBO BB/  
 PULPROG zgpg30  
 TD 65536  
 SOLVENT CDCl3  
 NS 16  
 DS 4  
 SWH 64102.563 Hz  
 FIDRES 0.978127 Hz  
 AQ 0.5111808 sec  
 RG 203.57  
 DW 7.800 usec  
 DE 6.50 usec  
 TE 295.8 K  
 D1 2.0000000 sec  
 D11 0.0300000 sec  
 TD0 1

==== CHANNEL f1 =====  
 SFO1 161.9674942 MHz  
 NUC1 31P  
 P1 14.25 usec  
 PLW1 15.0000000 W

==== CHANNEL f2 =====  
 SFO2 400.1316005 MHz  
 NUC2 1H  
 CPDPRG2 waltz16  
 PCPD2 90.00 usec  
 PLW2 10.0000000 W  
 PLW12 0.31604999 W  
 PLW13 0.25600001 W

F2 - Processing parameters  
 SI 32768  
 SF 161.9755930 MHz  
 WDW EM  
 SSB 0  
 LB 1.00 Hz  
 GB 0  
 PC 1.40

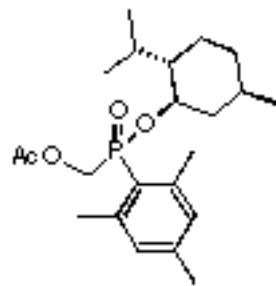

Compound 8a  
<sup>31</sup>P/<sup>1</sup>H NMR coupled

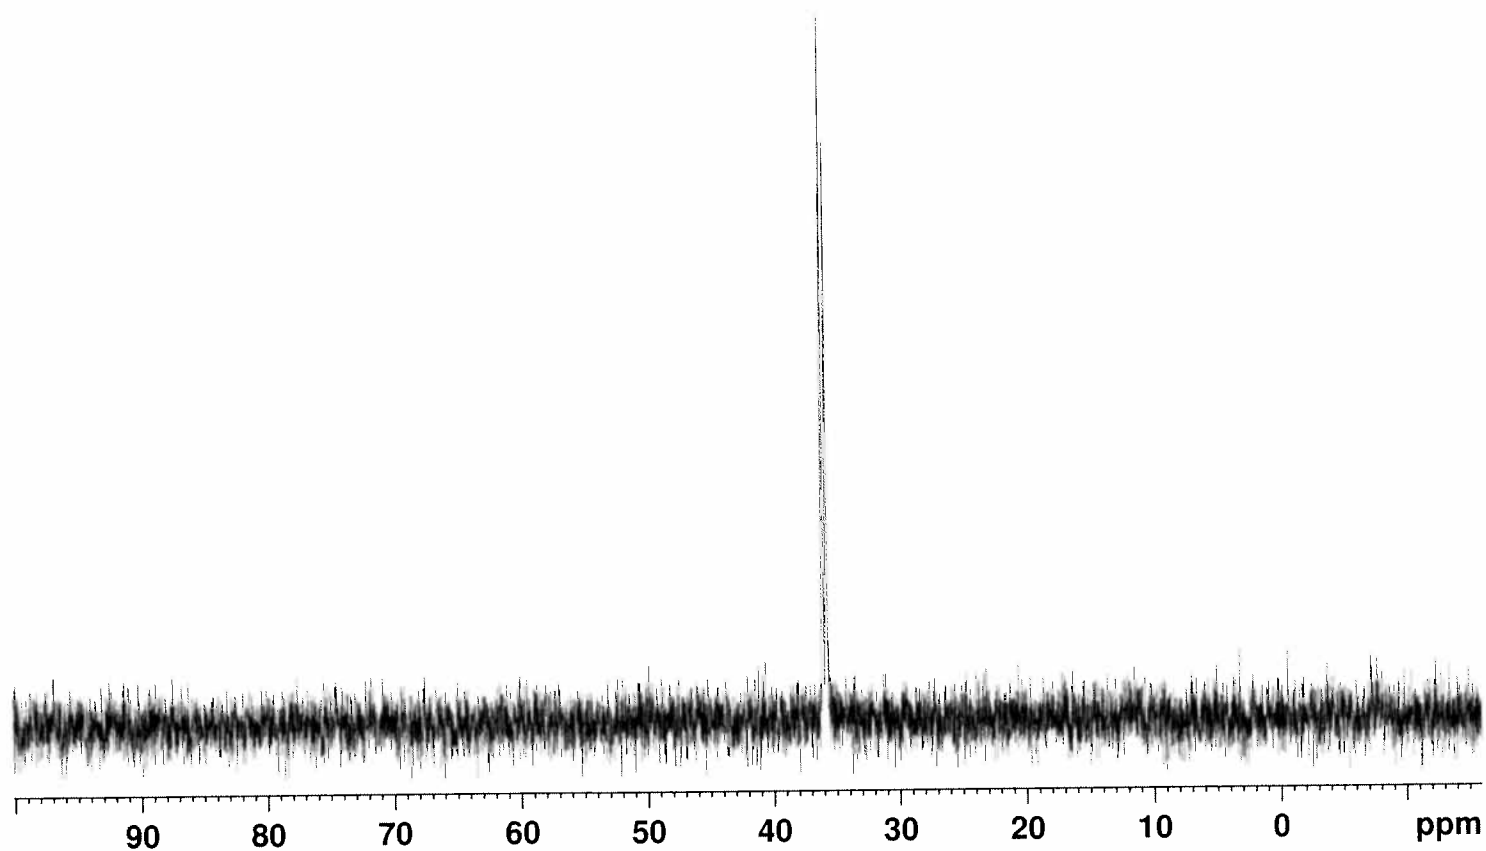

Current Data Parameters  
 NAME OB 1415  
 EXPNO 2  
 PROCNO 1

F2 - Acquisition Parameters  
 Date\_ 20140407  
 Time 16.59  
 INSTRUM spect  
 PROBHD 5 mm PABBO BB/  
 PULPROG zg30  
 TD 65536  
 SOLVENT CDC13  
 NS 32  
 DS 4  
 SWH 64102.563 Hz  
 FIDRES 0.978127 Hz  
 AQ 0.5111808 sec  
 RG 203.57  
 DW 7.800 usec  
 DE 6.50 usec  
 TE 295.7 K  
 D1 2.00000000 sec  
 TDO i

==== CHANNEL f1 =====  
 SFO1 161.9674942 MHz  
 NUC1 31P  
 P1 14.25 usec  
 PLW1 15.00000000 W

F2 - Processing parameters  
 SI 32768  
 SF 161.9755930 MHz  
 WDW EM  
 SSB 0  
 LB 1.00 Hz  
 GB 0  
 PC 1.40



41.483  
40.987

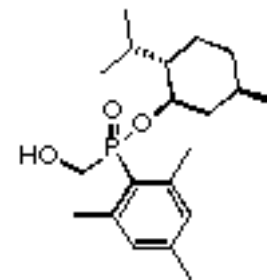

Compound 8b  
<sup>31</sup>P/<sup>1</sup>H NMR decoupled

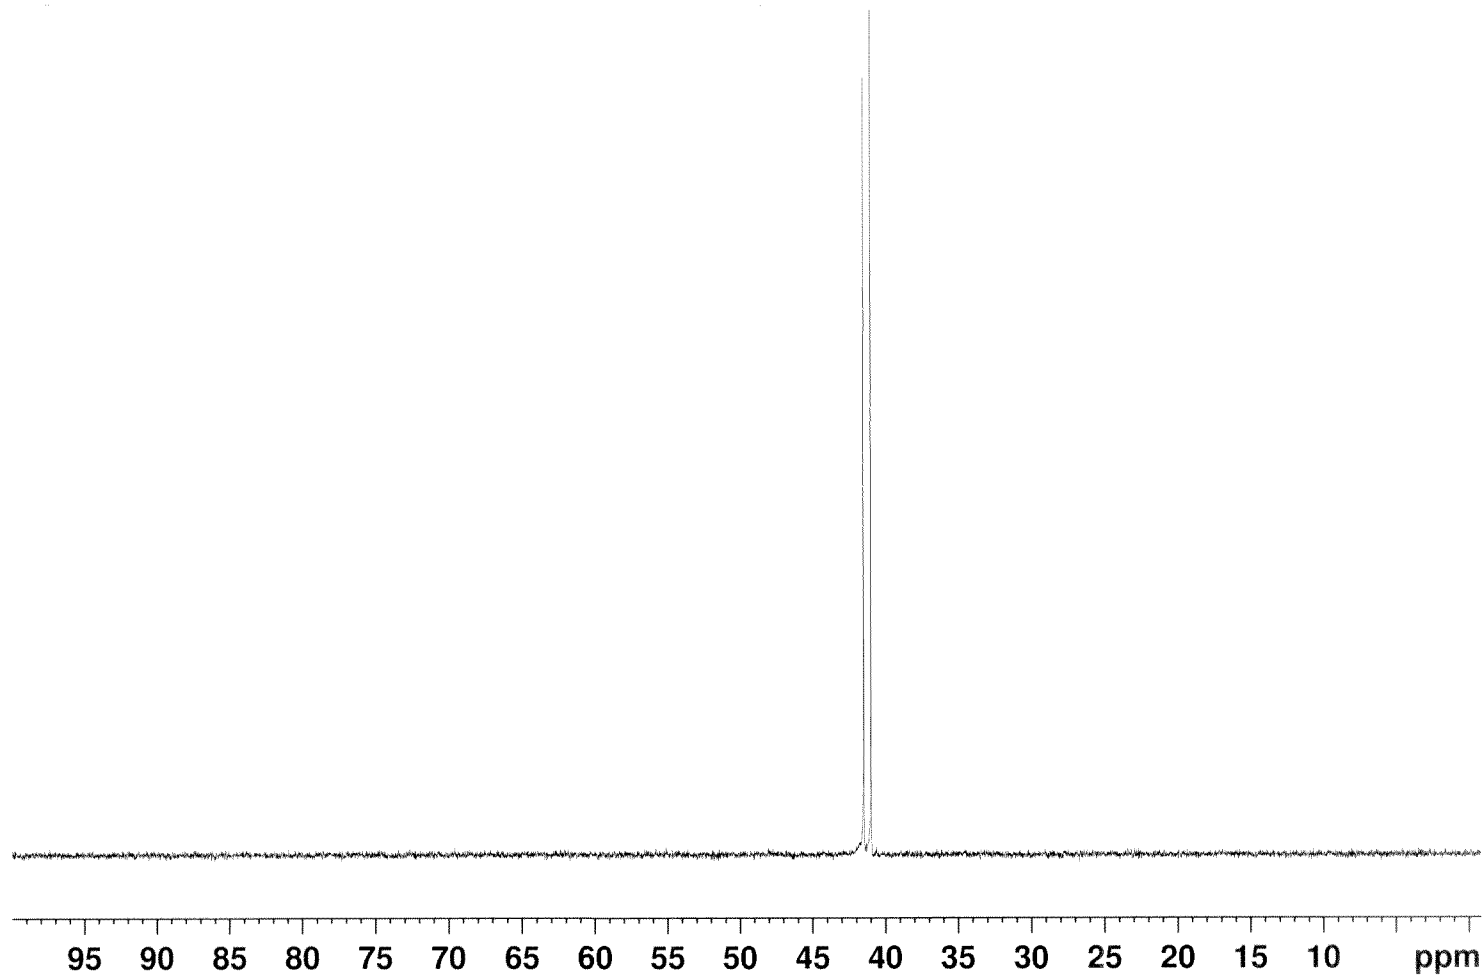

Current Data Parameters  
NAME OB 1419 pure  
EXPNO 1  
PROCNO 1

F2 - Acquisition Parameters  
Date\_ 20140411  
Time 10.39  
INSTRUM spect  
PROBHD 5 mm PABBO BB/  
PULPROG zgpg30  
TD 65536  
SOLVENT CDCl3  
NS 16  
DS 4  
SWH 64102.563 Hz  
FIDRES 0.978127 Hz  
AQ 0.5111808 sec  
RG 203.57  
DW 7.800 usec  
DE 6.50 usec  
TE 296.1 K  
D1 2.00000000 sec  
D11 0.03000000 sec  
TD0 1

==== CHANNEL f1 =====  
SFO1 161.9674942 MHz  
NUC1 31P  
P1 14.25 usec  
PLW1 15.00000000 W

==== CHANNEL f2 =====  
SFO2 400.1316005 MHz  
NUC2 1H  
CPDPRG[2] waltz16  
PCPD2 90.00 usec  
PLW2 10.00000000 W  
PLW12 0.31604999 W  
PLW13 0.25600001 W

F2 - Processing parameters  
SI 32768  
SF 161.9755930 MHz  
WDW EM  
SSB 0  
LB 1.00 Hz  
GB 0  
PC 1.40

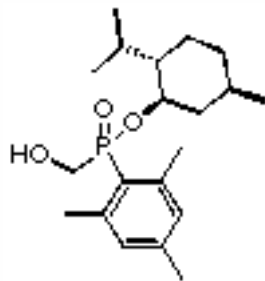

Compound 8b  
<sup>31</sup>P/<sup>1</sup>H NMR coupled

Current Data Parameters  
 NAME OB 1415  
 EXPNO 2  
 PROCNO 1

F2 - Acquisition Parameters  
 Date\_ 20140407  
 Time 16.59  
 INSTRUM spect  
 PROBHD 5 mm PABBO BB/  
 PULPROG zg30  
 TD 65536  
 SOLVENT CDC13  
 NS 32  
 DS 4  
 SWH 64102.563 Hz  
 FIDRES 0.978127 Hz  
 AQ 0.5111808 sec  
 RG 203.57  
 DW 7.800 usec  
 DE 6.50 usec  
 TE 295.7 K  
 D1 2.0000000 sec  
 TD0 1

==== CHANNEL f1 =====  
 SFO1 161.9674942 MHz  
 NUC1 31P  
 P1 14.25 usec  
 PLW1 15.00000000 W

F2 - Processing parameters  
 SI 32768  
 SF 161.9755930 MHz  
 WDW EM  
 SSB 0  
 LB 1.00 Hz  
 GB 0  
 PC 1.40

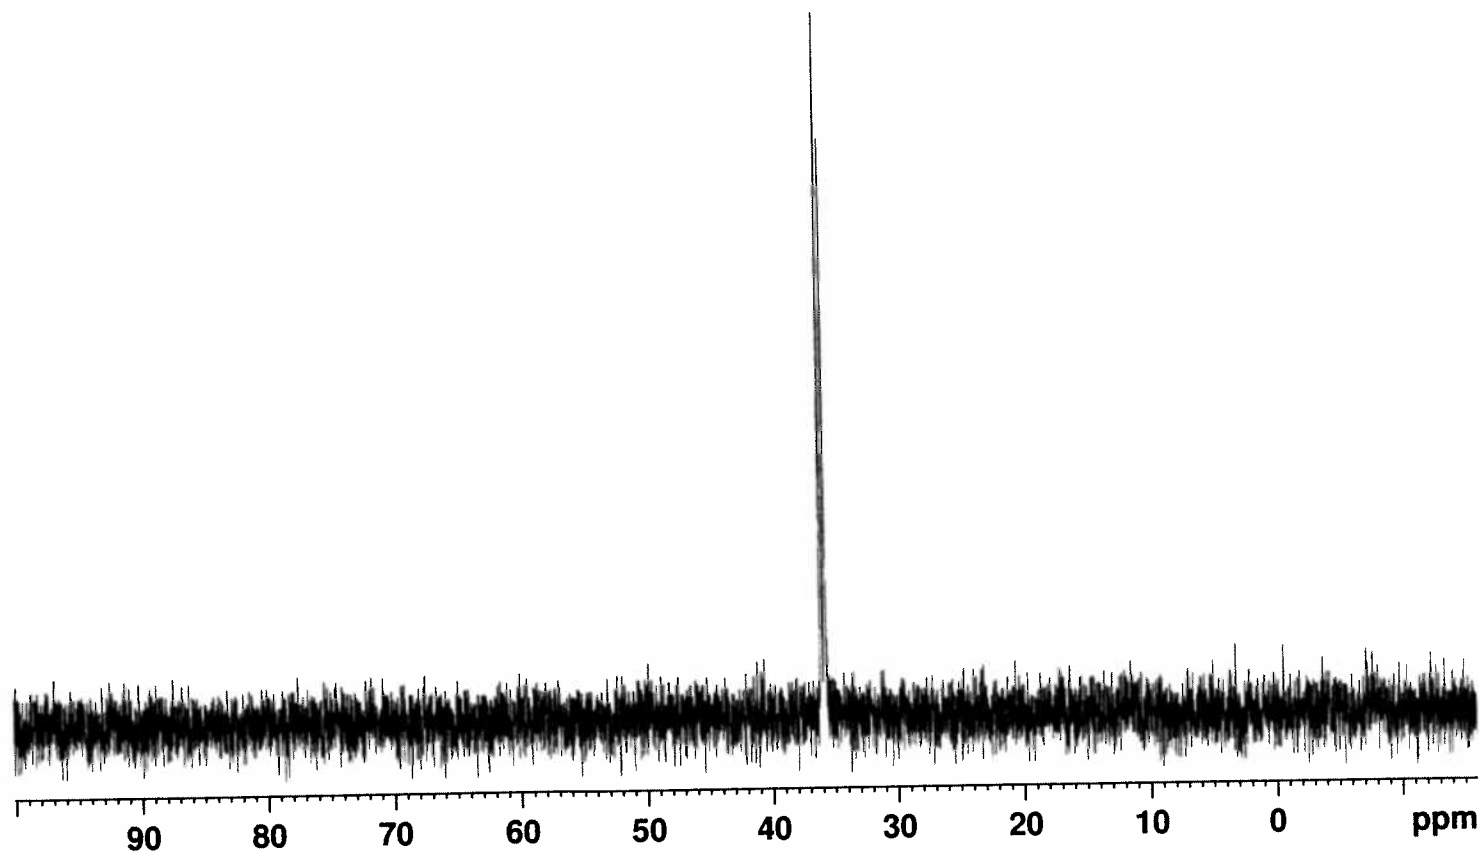

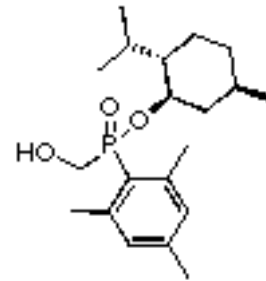

Compound 8b  
<sup>1</sup>H NMR

Current Data Parameters  
 NAME OB 1419 pure  
 EXPNO 3  
 PROCNO 1

F2 - Acquisition Parameters  
 Date\_ 20140411  
 Time 10.43  
 INSTRUM spect  
 PROBHD 5 mm PABBO BB/  
 PULPROG zg30  
 TD 65536  
 SOLVENT CDCl3  
 NS 16  
 DS 2  
 SWH 8012.820 Hz  
 FIDRES 0.122266 Hz  
 AQ 4.0894465 sec  
 RG 99.73  
 DW 62.400 usec  
 DE 6.50 usec  
 TE 295.7 K  
 D1 1.00000000 sec  
 TD0 1

==== CHANNEL f1 =====  
 SFO1 400.1324710 MHz  
 NUC1 1H  
 P1 10.00 usec  
 PLW1 25.00300026 W

F2 - Processing parameters  
 SI 65536  
 SF 400.1300000 MHz  
 WDW EM  
 SSB 0  
 LB 0.30 Hz  
 GB 0  
 PC 1.00

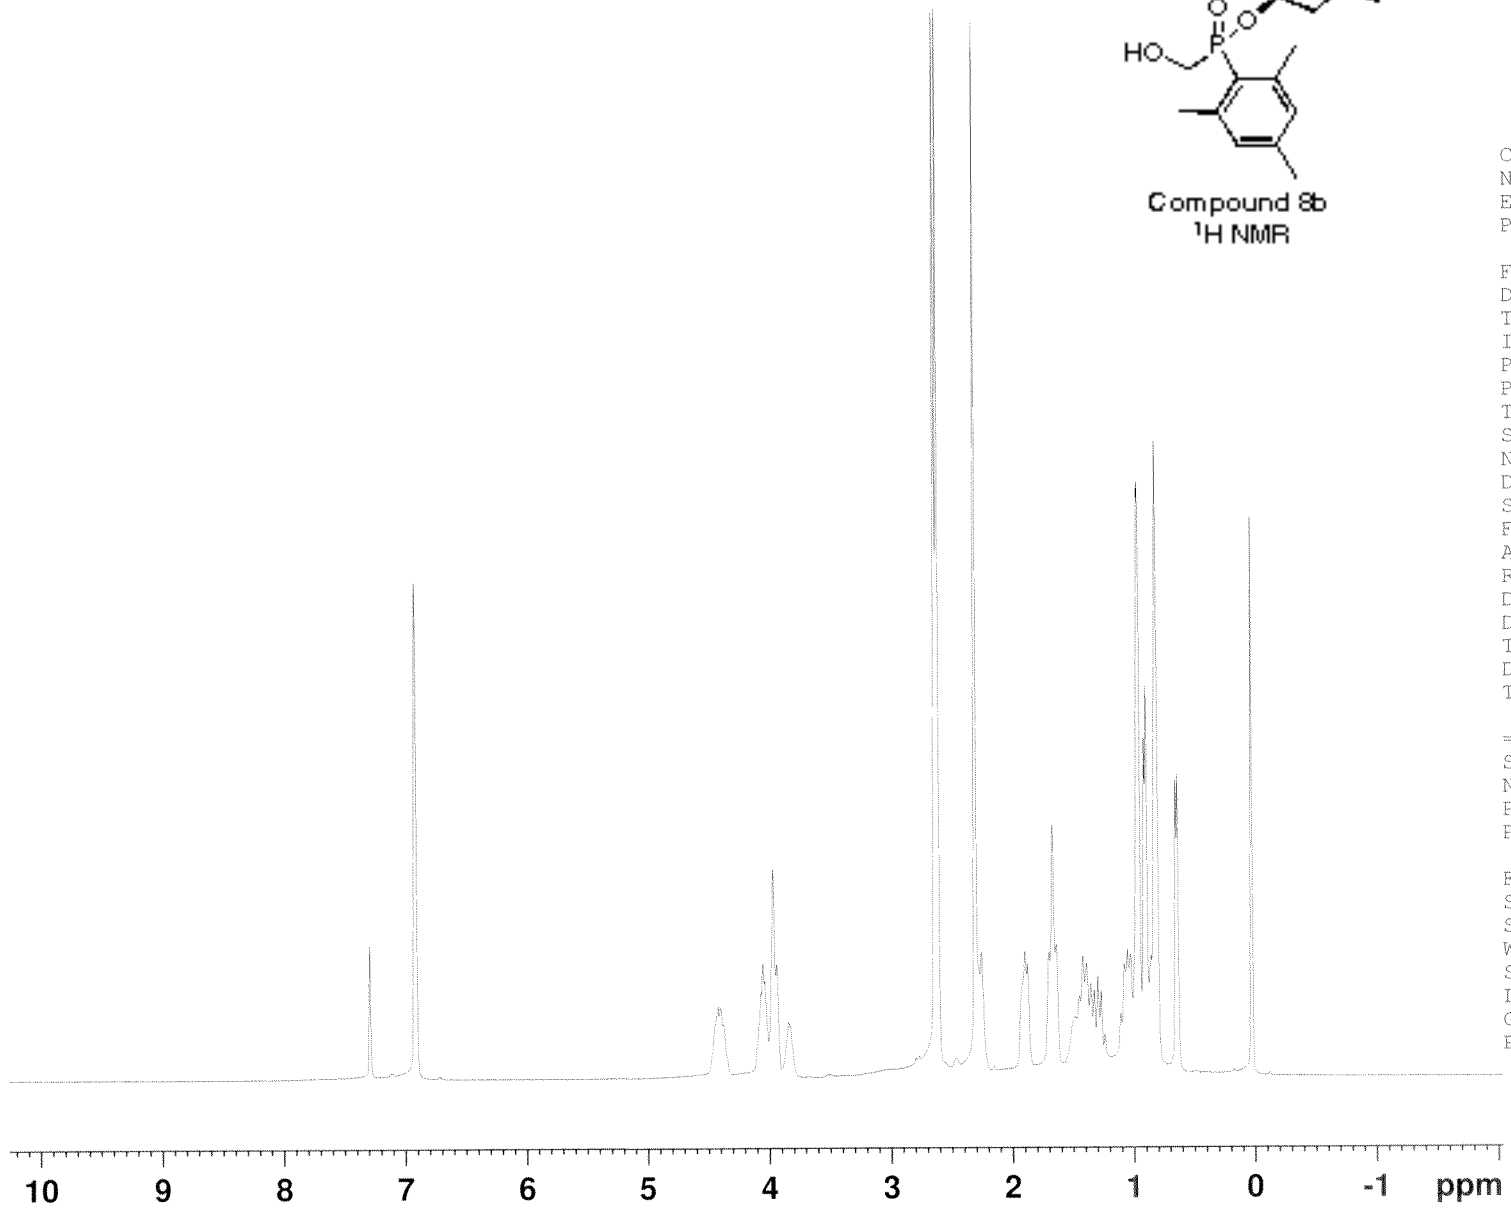

10 9 8 7 6 5 4 3 2 1 0 -1 ppm

2.00  
 1.13  
 2.60  
 0.55  
 6.40  
 4.24  
 1.47  
 2.25  
 3.56  
 11.10  
 1.63

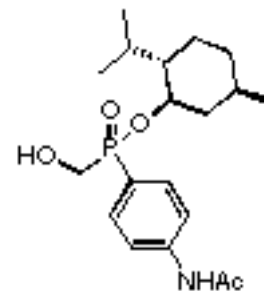

Compound 9b  
<sup>31</sup>P/<sup>1</sup>H NMR decoupled

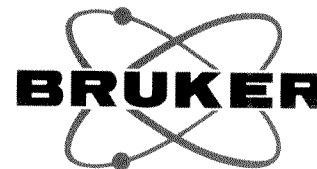

Current Data Parameters  
 NAME OB 1425 2nd crystallization in CH3CN  
 EXPNO 1  
 PROCNO 1

F2 - Acquisition Parameters  
 Date\_ 20151111  
 Time 11.48  
 INSTRUM spect  
 PROBHD 5 mm PABBO BB/  
 PULPROG zgpg30  
 TB 65536  
 SOLVENT CDCl3  
 NS 16  
 DS 4  
 SWH 84102.563 Hz  
 FIDRES 0.978127 Hz  
 AQ 0.5111808 sec  
 RG 203.57  
 DW 7.800 usec  
 DE 6.50 usec  
 TE 293.9 K  
 D1 2.00000000 sec  
 D11 0.03000000 sec  
 TD0 1

\*\*\*\*\* CHANNEL f1 \*\*\*\*\*  
 SF01 161.9674942 MHz  
 NUCL1 31P  
 P1 14.25 usec  
 PLW1 15.00000000 W

\*\*\*\*\* CHANNEL f2 \*\*\*\*\*  
 SF02 400.1316005 MHz  
 NUC2 1H  
 CPDPRG2 waltz16  
 PCPD2 90.00 usec  
 PLW2 10.00000000 W  
 PLW12 0.31604999 W  
 PLW13 0.25600001 W

F2 - Processing parameters  
 SI 32768  
 SF 161.9755930 MHz  
 RBW EM  
 SSB 0  
 LB 1.00 Hz  
 GB 0  
 PC 1.40

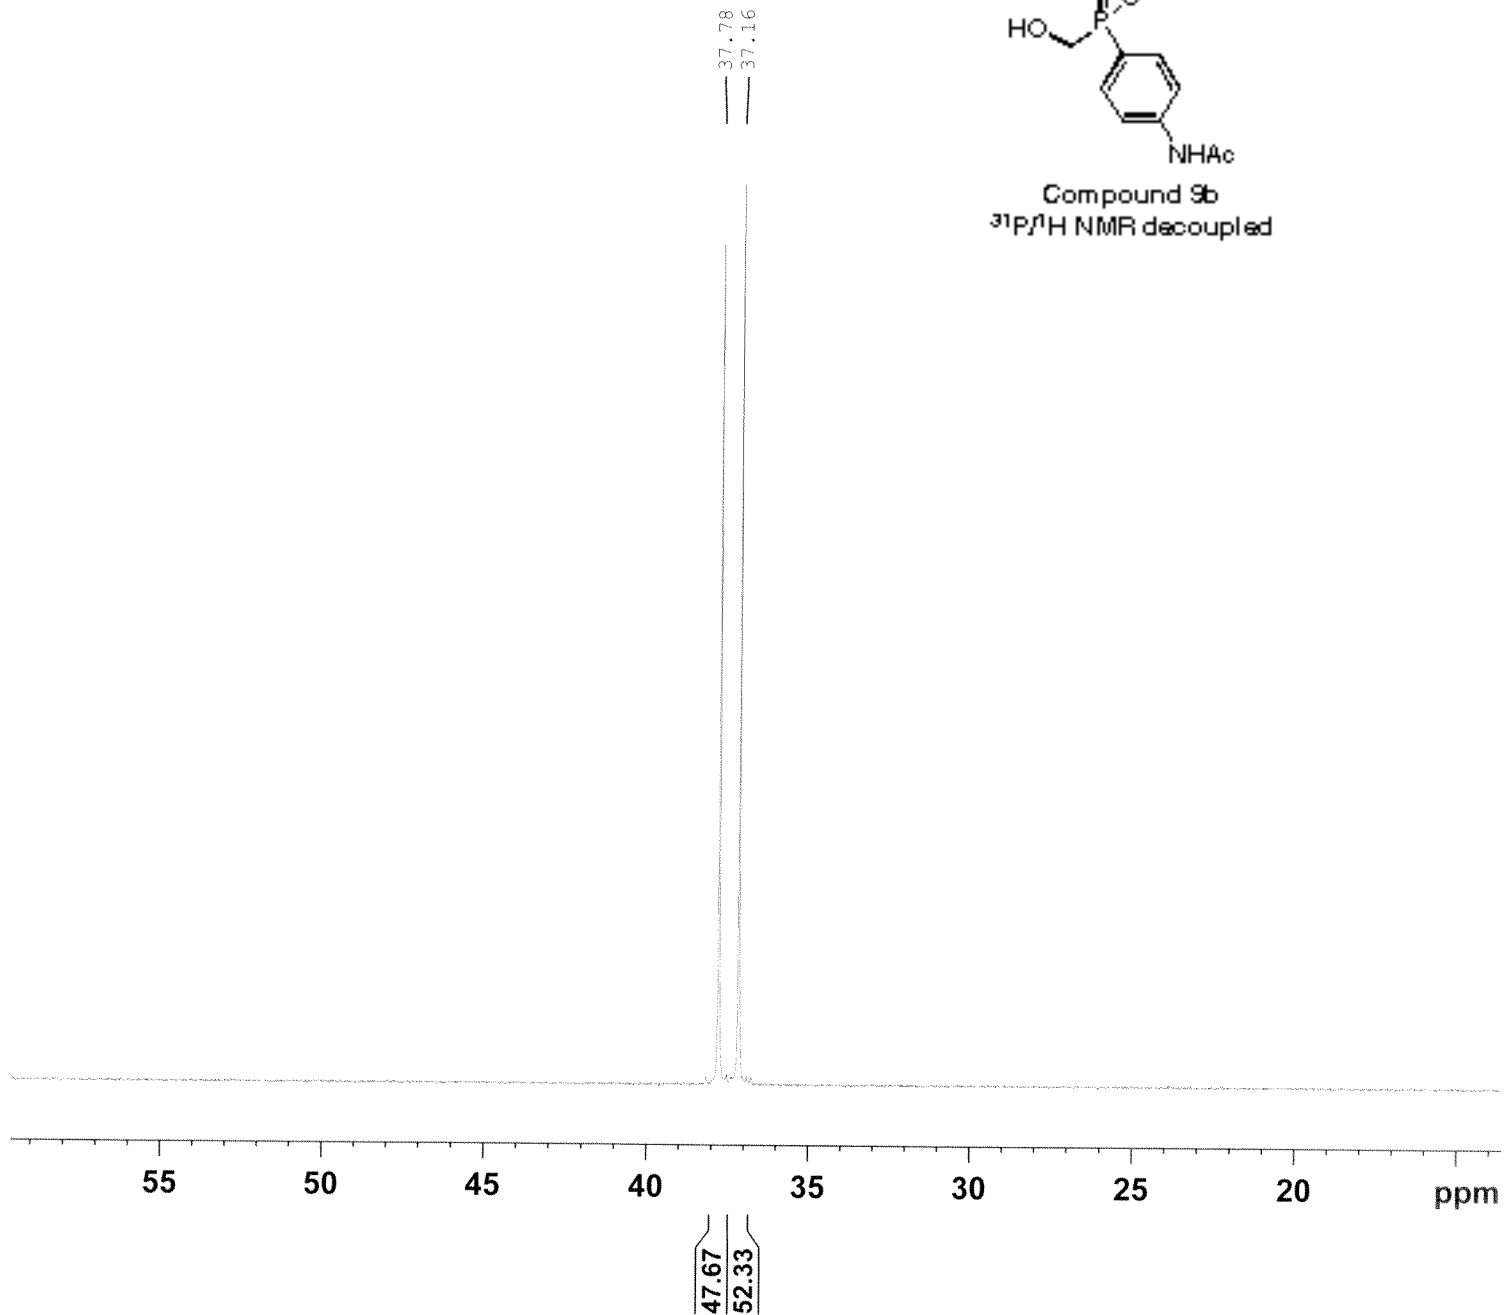

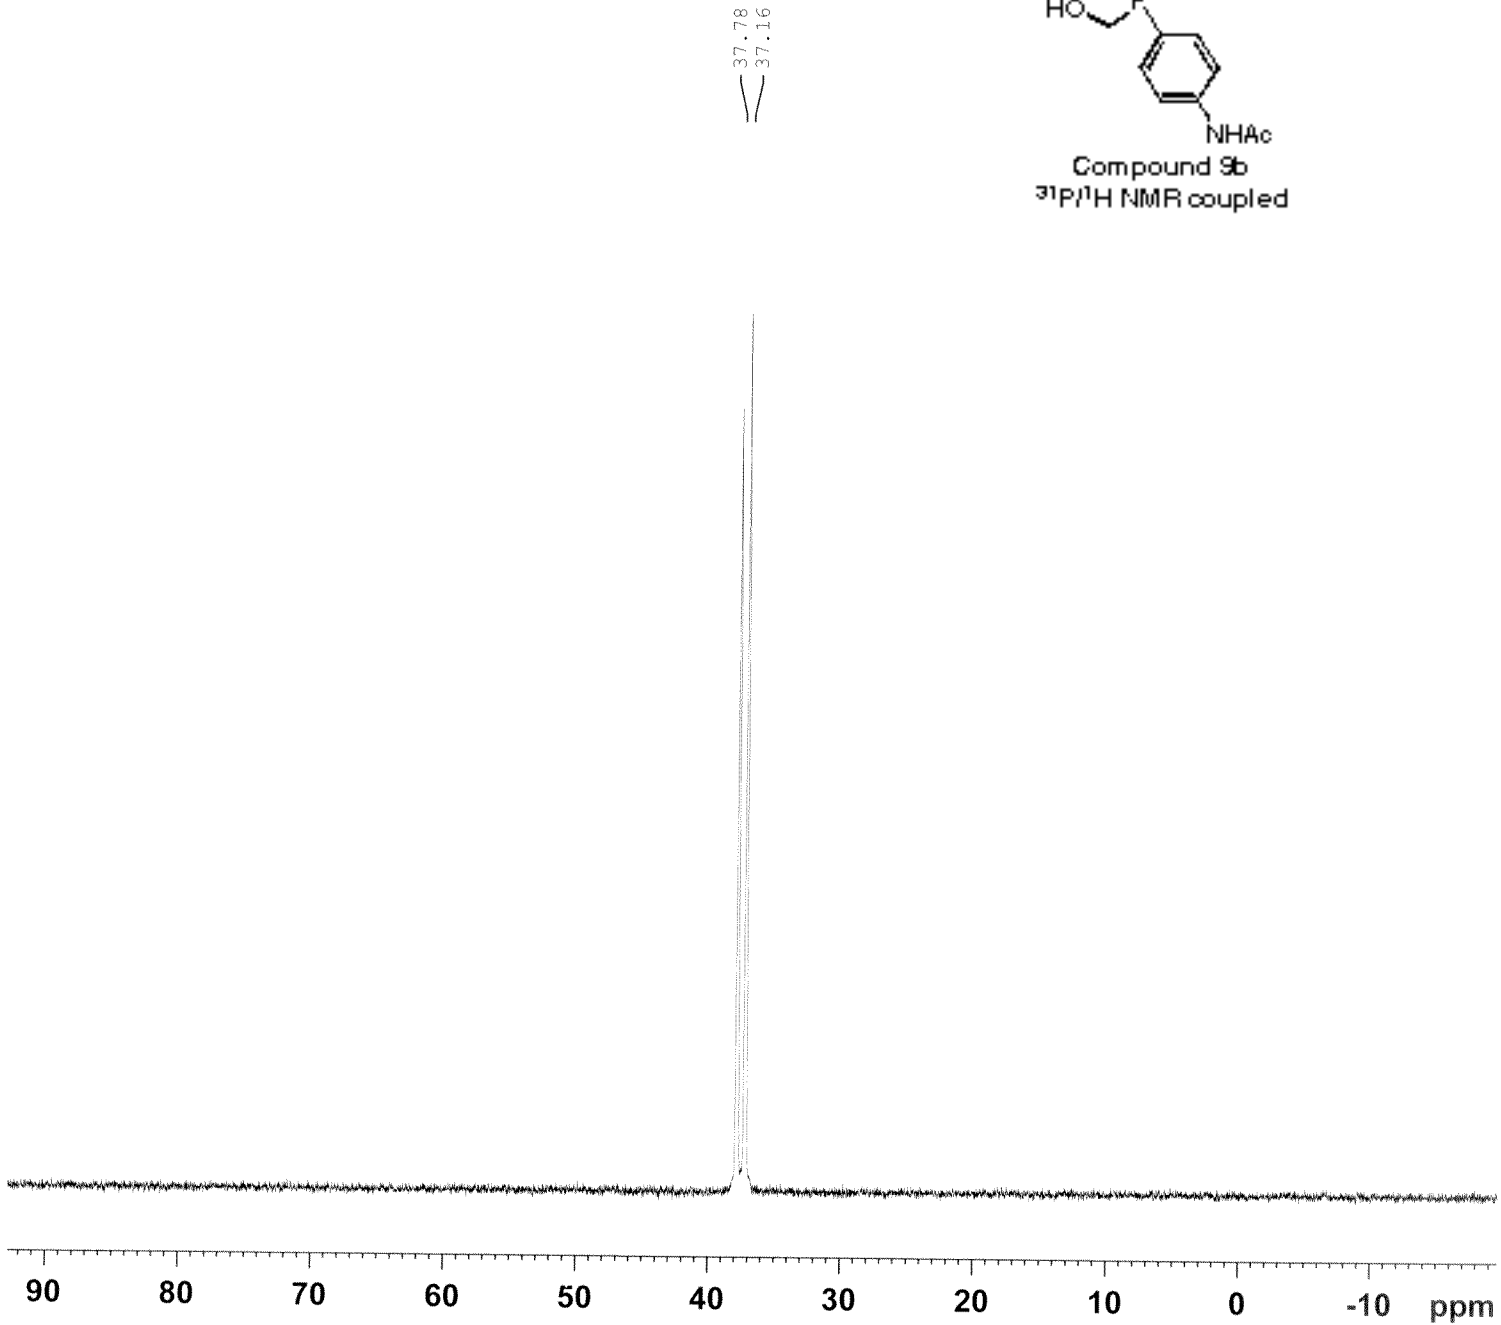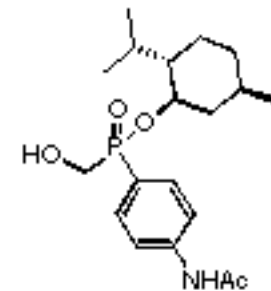

Compound 9b  
<sup>31</sup>P/<sup>1</sup>H NMR coupled

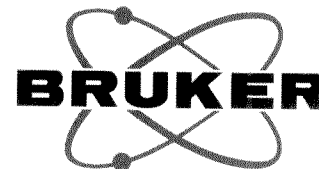

Current Data Parameters  
 NAME OB 1425 2nd crystallization in CH3CN  
 EXPNO 2  
 PROCNO 1

F2 - Acquisition Parameters  
 Date 20151111  
 Time 11.51  
 INSTRUM spect  
 PROBHD 5 mm PABBO BB/  
 PULPROG zg30  
 TD 65536  
 SOLVENT CDCl3  
 NS 32  
 DS 4  
 SWH 64102.563 Hz  
 FIDRES 0.978127 Hz  
 AQ 0.5111808 sec  
 RG 203.57  
 DW 7.800 usec  
 DE 6.50 usec  
 TE 293.5 K  
 DI 2.00000000 sec  
 TDO 1

\*\*\*\*\* CHANNEL f1 \*\*\*\*\*  
 SF01 161.9674942 MHz  
 NUC1 31P  
 P1 14.25 usec  
 PLW1 15.00000000 W

F2 - Processing parameters  
 SI 32768  
 SF 161.9755930 MHz  
 WDW EM  
 SSB 0  
 LB 1.00 Hz  
 GB 0  
 PC 1.40

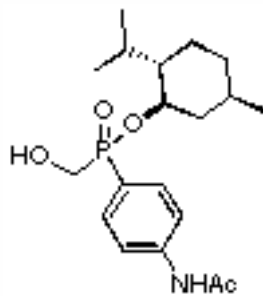

Compound 9b  
<sup>1</sup>H NMR

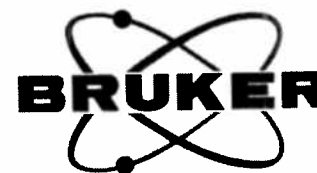

Current Data Parameters  
 NAME OB 1425 2nd crystallization in CH3CN  
 EXPNO 3  
 PROCNO 1

F2 - Acquisition Parameters  
 Date\_ 20151111  
 Time 11.52  
 INSTRUM spect  
 PROBHD 5 mm PABBO BB/  
 PULPROG zg30  
 TD 65536  
 SOLVENT CDCl3  
 NS 9  
 DS 2  
 SWH 8012.820 Hz  
 FIDRES 0.122266 Hz  
 AQ 4.0894465 sec  
 RG 32.38  
 DW 62.400 usec  
 DE 6.50 usec  
 TE 293.5 K  
 D1 1.00000000 sec  
 TDO 1

\*\*\*\*\* CHANNEL f1 \*\*\*\*\*  
 SFO1 400.1324710 MHz  
 NUC1 1H  
 P1 10.00 usec  
 PLW1 25.00300026 W

F2 - Processing parameters  
 SI 65536  
 SF 400.1300000 MHz  
 WDW EM  
 SSB 0  
 LB 0.30 Hz  
 GB 0  
 PC 1.00

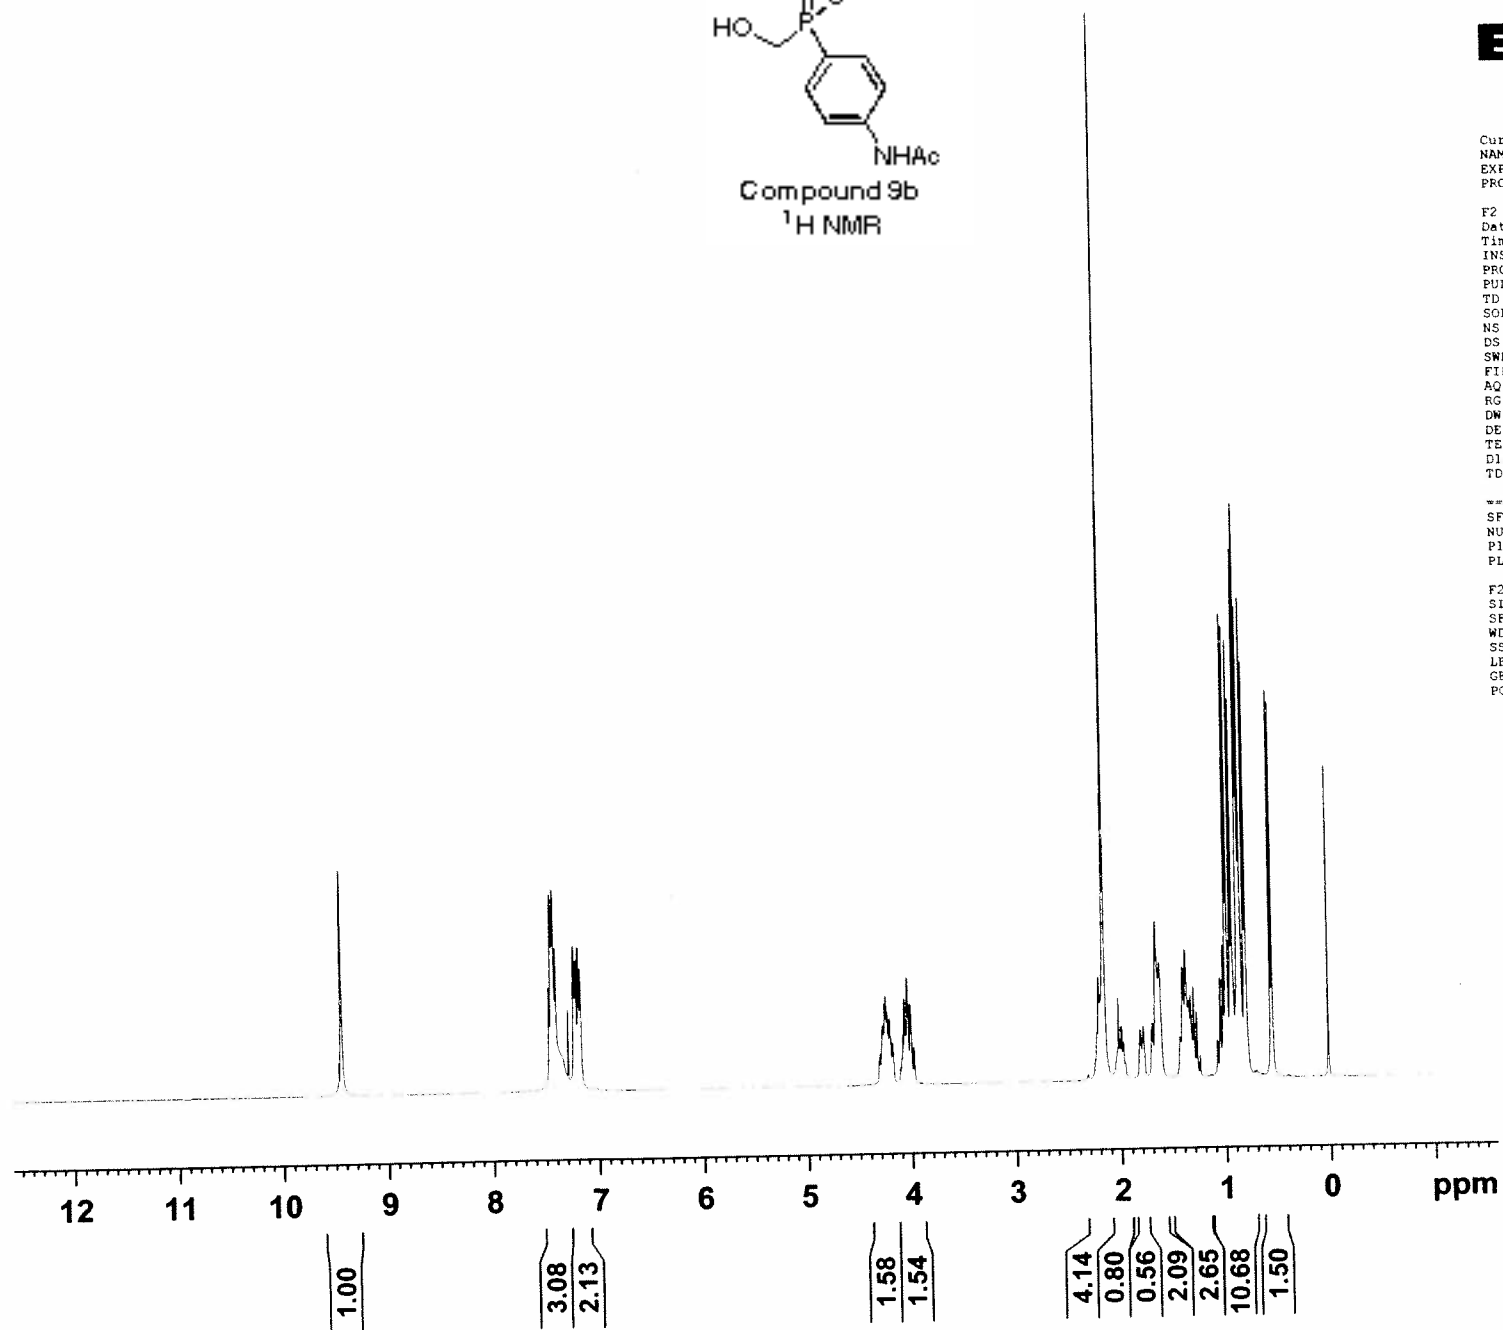

OB 320

pad=10 run with findz0 before acquisition

exp1 Phosphorus

| SAMPLE      |                     | SPECIAL    |          |
|-------------|---------------------|------------|----------|
| date        | Apr 12 2012         | temp       | not used |
| solvent     | cdc13               | gain       | 14       |
| file        | /home/TCUser~       | spin       | 20       |
|             | /vnmrsys/data/auto~ | hst        | 0.008    |
|             | _2012.04.10/s_2012~ | pw90       | 18.300   |
|             | 0412_30/data/cdc13~ | alfa       | 10.000   |
|             | 03.fid              | FLAGS      |          |
| ACQUISITION |                     | PROCESSING |          |
| sw          | 15797.8             | il         | n        |
| at          | 1.600               | in         | n        |
| np          | 50552               | dp         | y        |
| fb          | 8800                | hs         | ny       |
| bs          | 64                  | 1b         | 1.00     |
| d1          | 1.000               | fn         | not used |
| nt          | 16                  | DISPLAY    |          |
| ct          | 16                  | sp         | -3647.3  |
| TRANSMITTER |                     | wp         | 15797.3  |
| tn          | P31                 | rfl        | 3647.8   |
| sfrq        | 121.465             | rfp        | 0        |
| tof         | 7421.1              | rp         | 63.9     |
| tpwr        | 55                  | lp         | -113.7   |
| pw          | 9.150               | PLOT       |          |
| DECOUPLER   |                     | wc         | 250      |
| dn          | H1                  | sc         | 0        |
| dof         | 0                   | vs         | 37       |
| dm          | YYY                 | th         | 13       |
| dmm         | w                   | ai         | cdc ph   |
| dpwr        | 35                  |            |          |
| dmf         | 6700                |            |          |

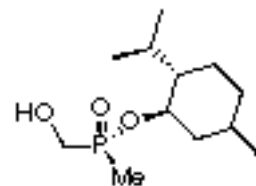

Compound (Rp)-10  
<sup>31</sup>P/<sup>1</sup>H NMR decoupled

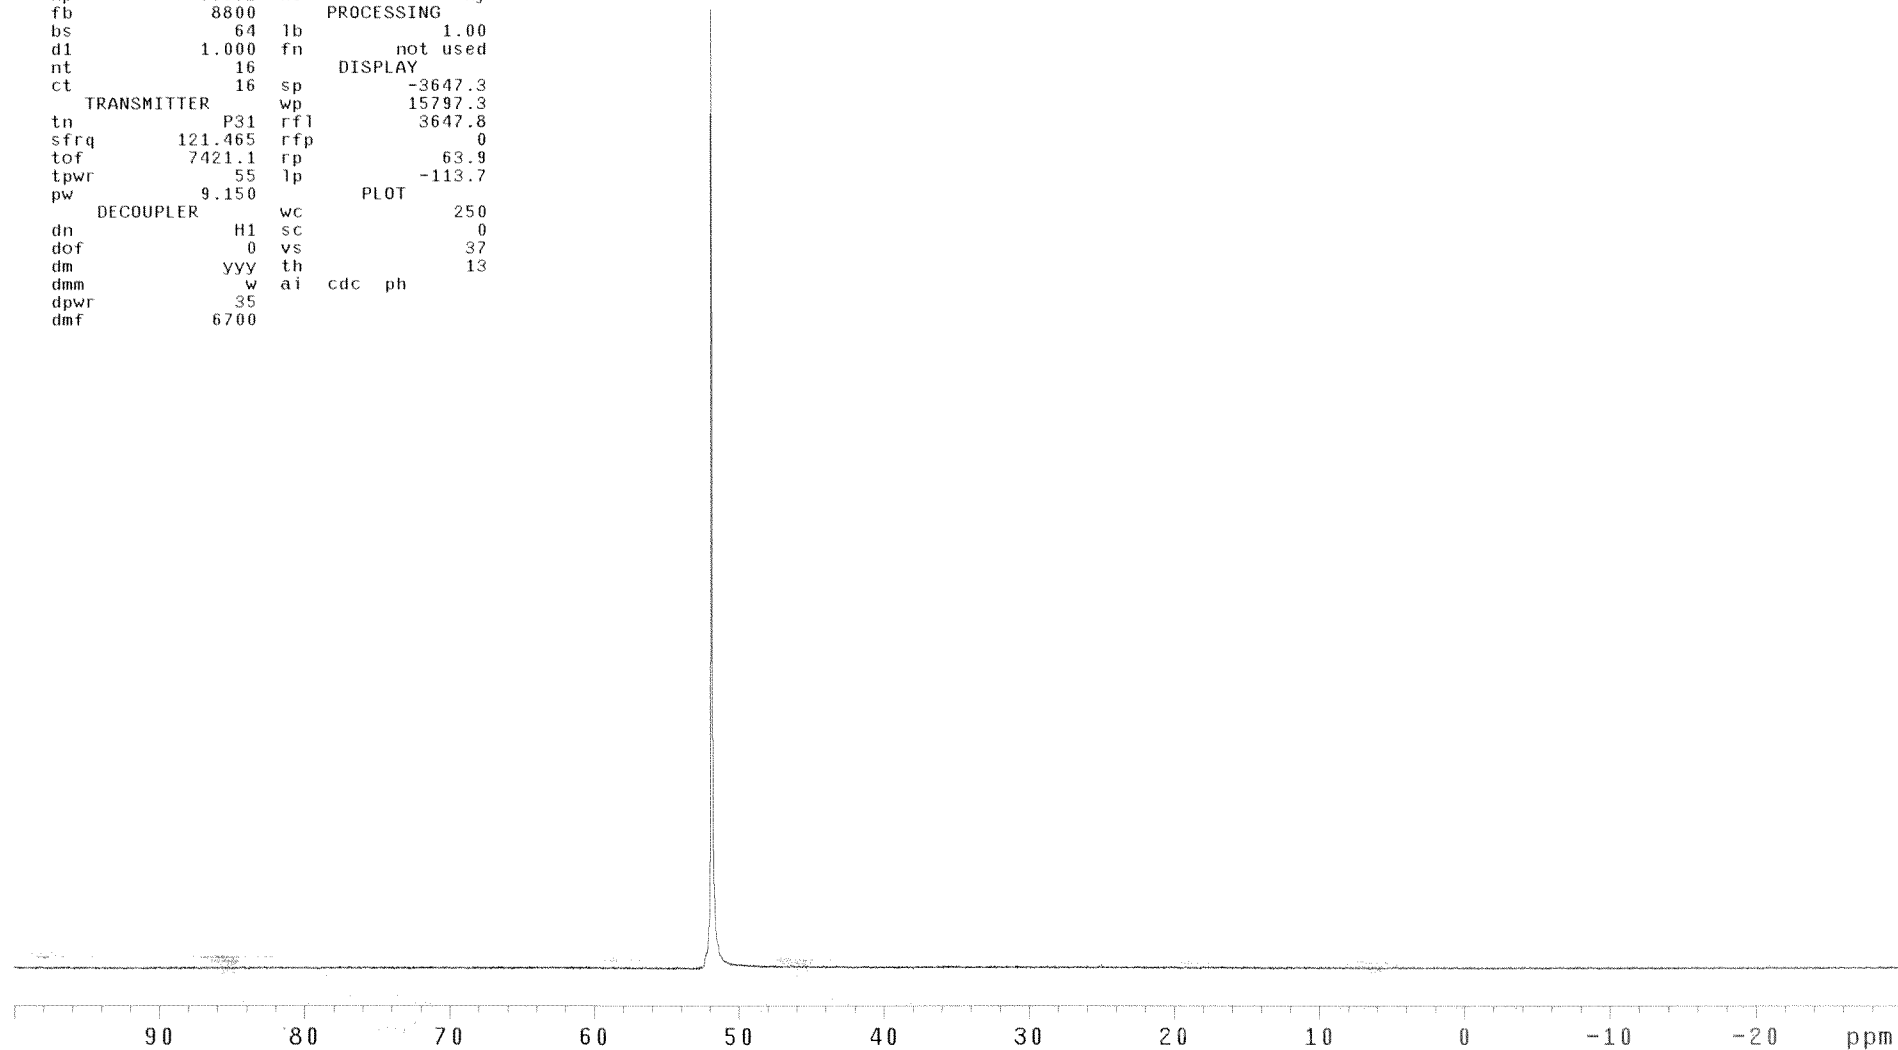

08 320

exp1 Phosphorus

| SAMPLE              |                | SPECIAL    |          |
|---------------------|----------------|------------|----------|
| date                | Apr 12 2012    | temp       | not used |
| solvent             | cdcl3          | gain       | 14       |
| file                | /home/TCUuser~ | spin       | 20       |
| /vnmrsys/data/autoc |                | hst        | 0.008    |
| _2012.04.10/s_2012~ |                | pw90       | 18.300   |
| 0412_30/data/cdc13~ |                | alfa       | 10.000   |
| _06.fid             |                | FLAGS      |          |
| ACQUISITION         |                | il         | n        |
| sw                  | 15797.8        | in         | n        |
| at                  | 1.600          | dp         | y        |
| np                  | 50552          | hs         | ny       |
| fb                  | 8800           | PROCESSING |          |
| bs                  | 64             | lb         | 1.00     |
| d1                  | 1.000          | fn         | not used |
| nt                  | 16             | DISPLAY    |          |
| ct                  | 16             | sp         | -3647.3  |
| TRANSMITTER         |                | wp         | 15797.3  |
| tn                  | P31            | rfl        | 3647.8   |
| sfrq                | 121.465        | rfp        | 0        |
| tof                 | 7421.1         | rp         | 67.1     |
| tpwr                | 55             | lp         | -113.7   |
| pw                  | 9.150          | PLOT       |          |
| DECOUPLER           |                | wc         | 250      |
| dn                  | H1             | sc         | 0        |
| dof                 | 0              | vs         | 116      |
| dm                  | ynn            | th         | 22       |
| dmm                 | w              | ai         | cdc ph   |
| dpwr                | 35             |            |          |
| dmf                 | 6700           |            |          |

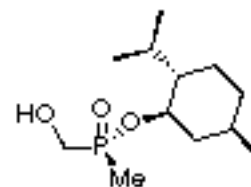

Compound (Rp)-10  
<sup>31</sup>P/<sup>1</sup>H NMR coupled

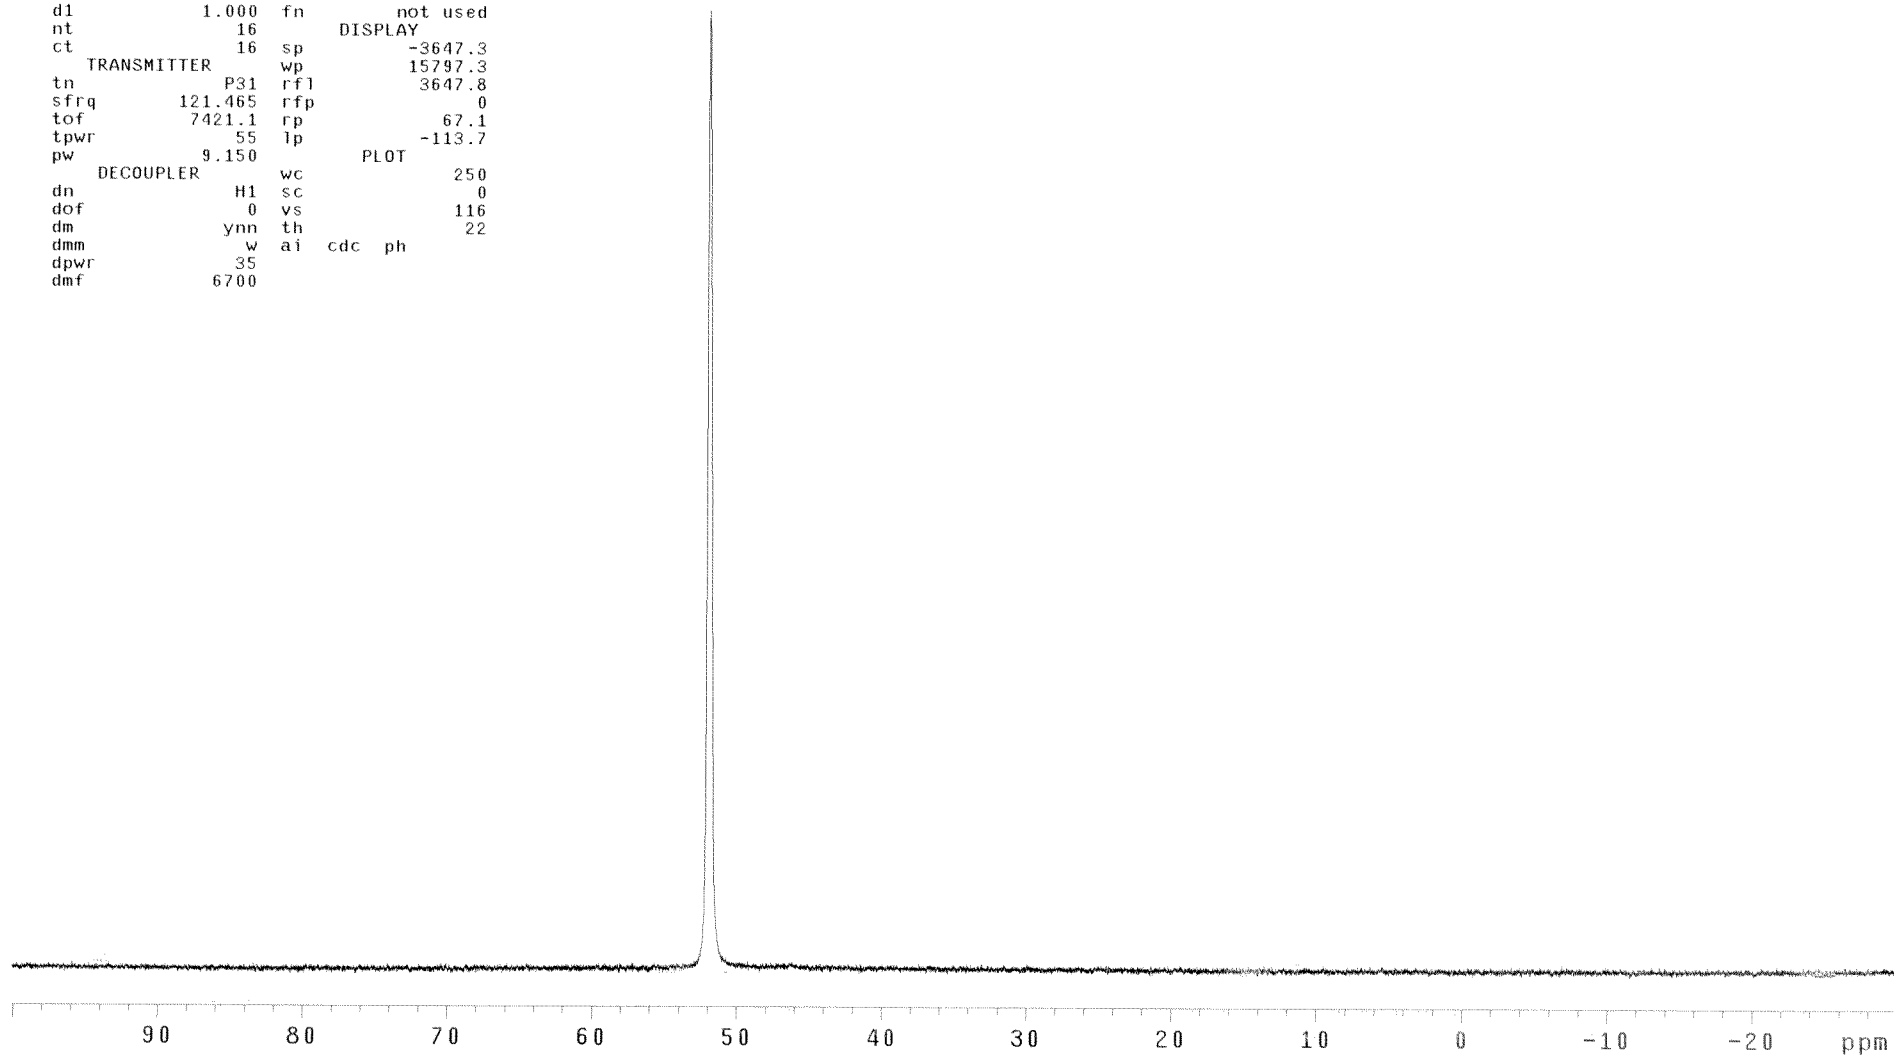



OB 320

exp1 Proton

SAMPLE DEC. & VT  
date Apr 12 2012 dfrq 75.454  
solvent cdc13 dn C13  
file /home/TCUuser~ dpwr 43  
/vnmrsys/data/autot~ dof 0  
\_2012.04.10/s\_2012~ dm nnn  
0412\_28/data/cdc13~ dmm c  
\_01.fid dmf 13100

ACQUISITION PROCESSING  
sfrq 300.047 wtfile  
tn H1 proc ft  
at 1.998 fn not used  
np 19184  
sw 4800.8 werr xmreact  
fb 2600 wexp abortoff flus~  
bs 16 h procplot aborton  
tpwr 55 wbs  
pw 7.9 wnt  
d1 1.000  
tof 277.9  
nt 32  
ct 32  
alock y  
gain not used

FLAGS  
il n  
in n  
dp y

DISPLAY  
sp -598.3  
wp 4800.5  
vs 202  
sc 0  
wc 240  
hzmm 20.00  
is 358.48  
rfl 598.6  
rfp 0  
th 3  
ins 1.000  
ai cdc ph

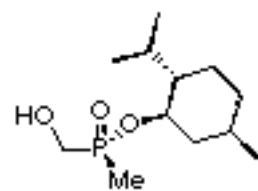

Compound (Rp)-10  
<sup>1</sup>H NMR

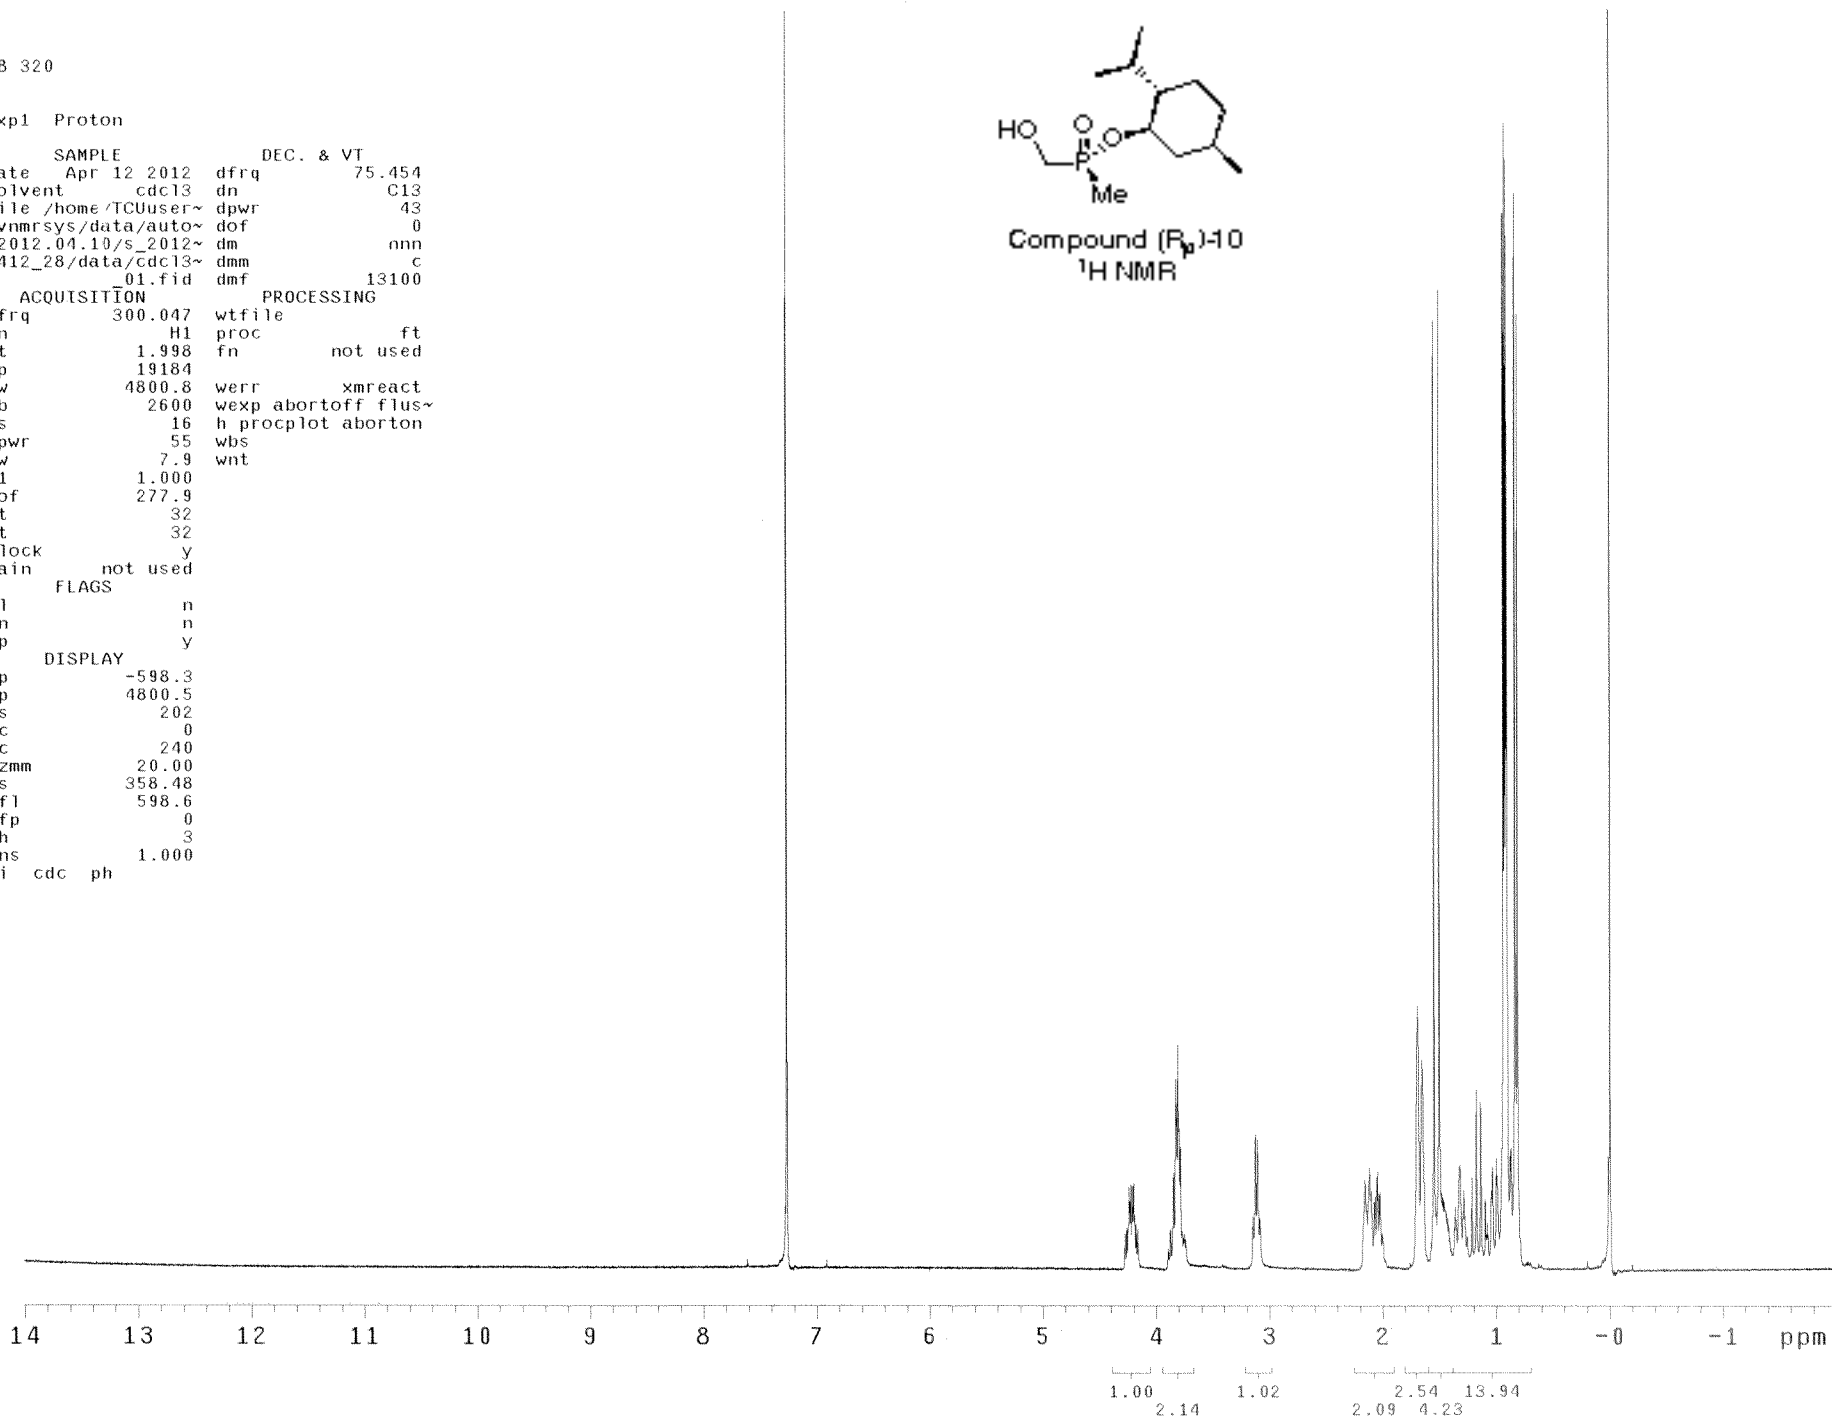

OB 320

exp1 Carbon

| SAMPLE              |                | SPECIAL    |          |
|---------------------|----------------|------------|----------|
| date                | Apr 12 2012    | temp       | not used |
| solvent             | cdc13          | gain       | 20       |
| file                | /home/!CUuser~ | spin       | 20       |
| /vnmr               | sys/data/auto~ | hst        | 0.008    |
| _2012.04.10/s_2012~ |                | pw90       | 18.500   |
| 0412_30/data/cdc13~ |                | alfa       | 10.000   |
| 07.fid              |                | FLAGS      |          |
| ACQUISITION         |                | PROCESSING |          |
| sw                  | 18115.9        | il         | n        |
| at                  | 1.301          | in         | n        |
| np                  | 47120          | dp         | y        |
| fb                  | 10000          | hs         | nn       |
| bs                  | 64             | lb         | 0.50     |
| d1                  | 2.000          | fn         | not used |
| nt                  | 512            | DISPLAY    |          |
| ct                  | 512            | sp         | -1135.5  |
| TRANSMITTER         |                | wp         | 18115.4  |
| tn                  | C13            | rfl        | 1136.1   |
| sfrq                | 75.454         | rfl        | 0        |
| tof                 | 766.0          | rp         | -3.0     |
| tpwr                | 58             | lp         | -195.3   |
| pw                  | 9.250          | PLOT       |          |
| DECOUPLER           |                | wc         | 250      |
| dn                  | H1             | sc         | 0        |
| dof                 | 0              | vs         | 297      |
| dm                  | yyy            | th         | 4        |
| dmm                 | w              | ai         | cdc ph   |
| dpwr                | 35             |            |          |
| dmf                 | 6700           |            |          |

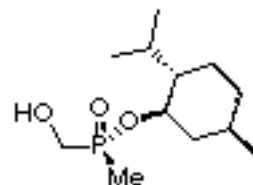

Compound (R<sub>p</sub>)-10  
<sup>13</sup>C NMR

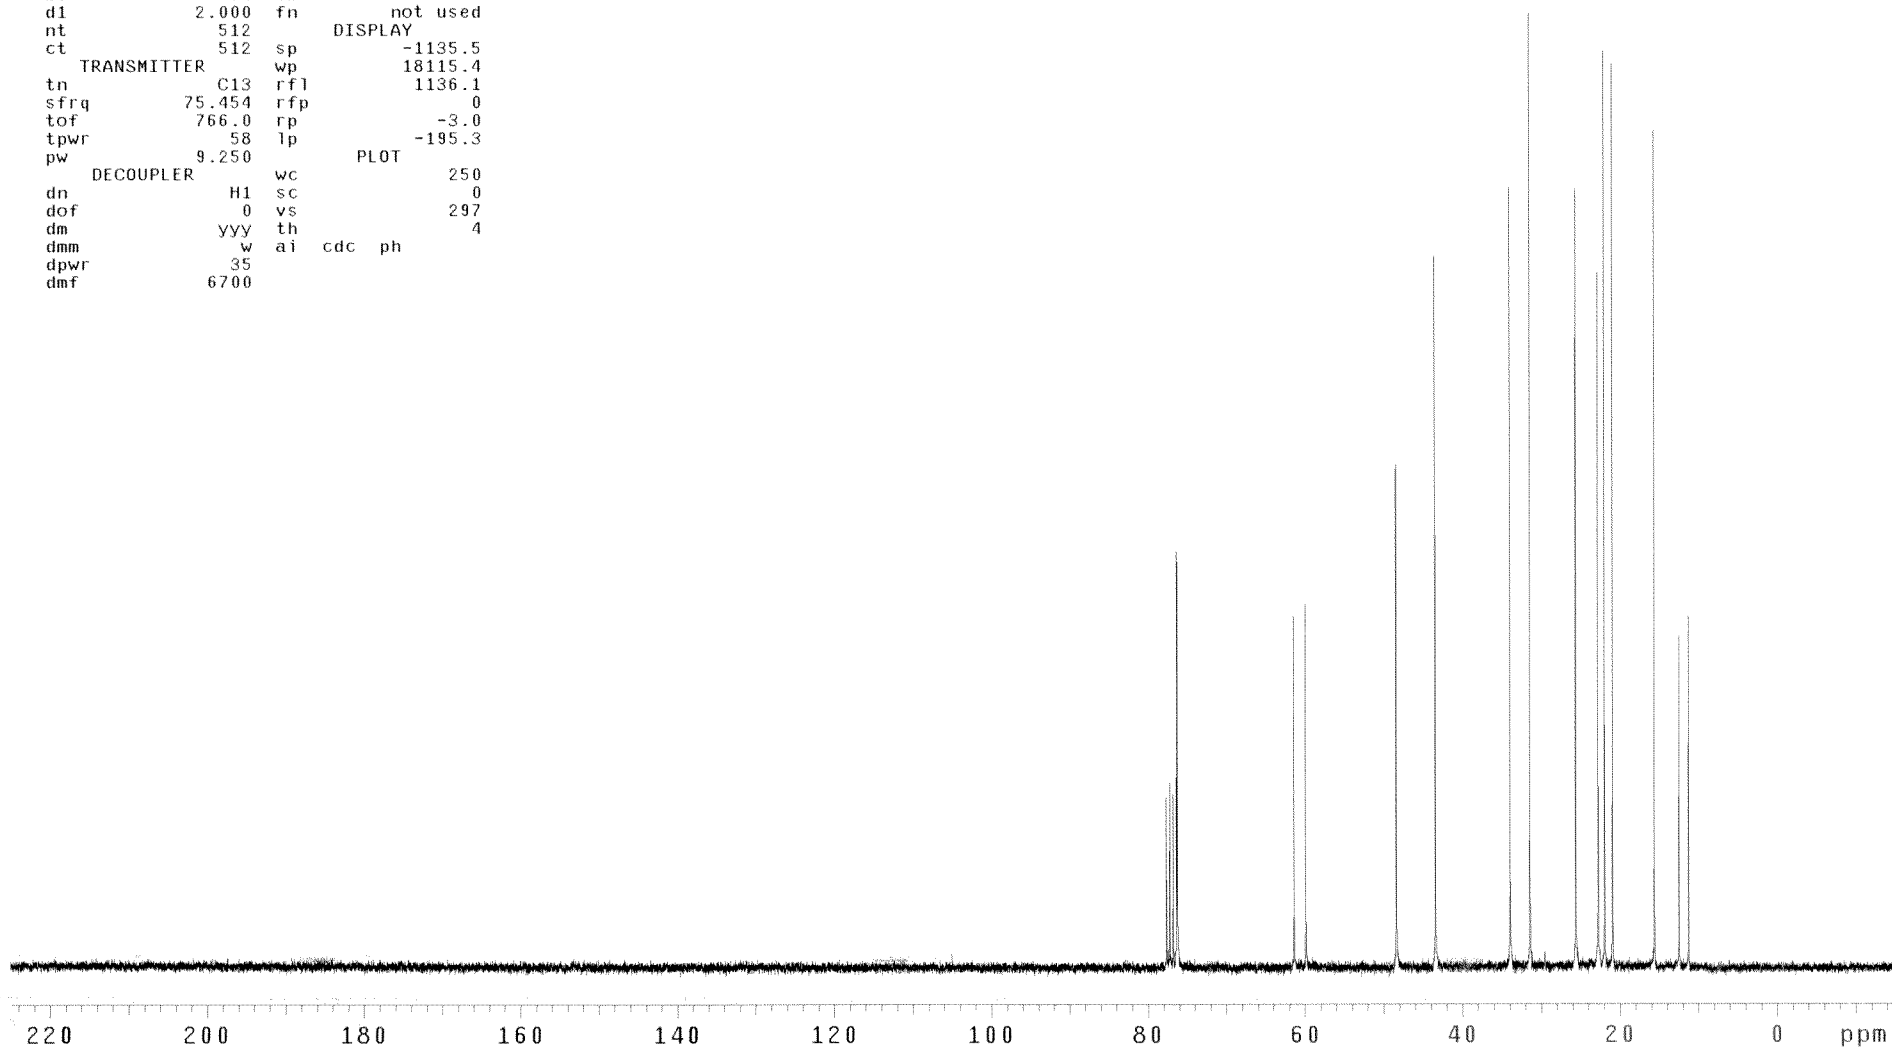

OB 877f2  
pad=10 run with findz0 before acquisition

exp1 Phosphorus

| SAMPLE              |                | SPECIAL    |          |
|---------------------|----------------|------------|----------|
| date                | Dec 19 2012    | temp       | not used |
| solvent             | cdc13          | gain       | 20       |
| file                | /home/TCUuser~ | spin       | 20       |
| /vnmrsys/data/auto~ |                | hst        | 0.008    |
| _2012.12.14/s_2012~ |                | pw90       | 18.300   |
| I219_28/data/Cdc13~ |                | alfa       | 10.000   |
| 02.fid              |                | FLAGS      |          |
| ACQUISITION         |                | PROCESSING |          |
| sw                  | 15797.8        | il         | n        |
| at                  | 1.600          | in         | n        |
| np                  | 50552          | dp         | y        |
| fb                  | 8800           | hs         | ny       |
| bs                  | 64             | lb         | 1.00     |
| d1                  | 1.000          | fn         | not used |
| nt                  | 16             | DISPLAY    |          |
| ct                  | 16             | sp         | -3647.3  |
| TRANSMITTER         |                | wp         | 15797.3  |
| tn                  | P31            | rf1        | 3647.8   |
| sfrq                | 121.465        | rfp        | 0        |
| tof                 | 7421.1         | rp         | 18.5     |
| tpwr                | 55             | lp         | -113.7   |
| pw                  | 9.150          | PLOT       |          |
| DECOUPLER           |                | wc         | 250      |
| dn                  | H1             | sc         | 0        |
| dof                 | 0              | vs         | 19       |
| dm                  | YYY            | th         | 3        |
| dmm                 | w              | ai         | cdc ph   |
| dpwr                | 35             |            |          |
| dmf                 | 6700           |            |          |

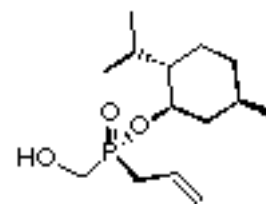

Compound (Rp)-11  
<sup>31</sup>P/<sup>1</sup>H NMR decoupled

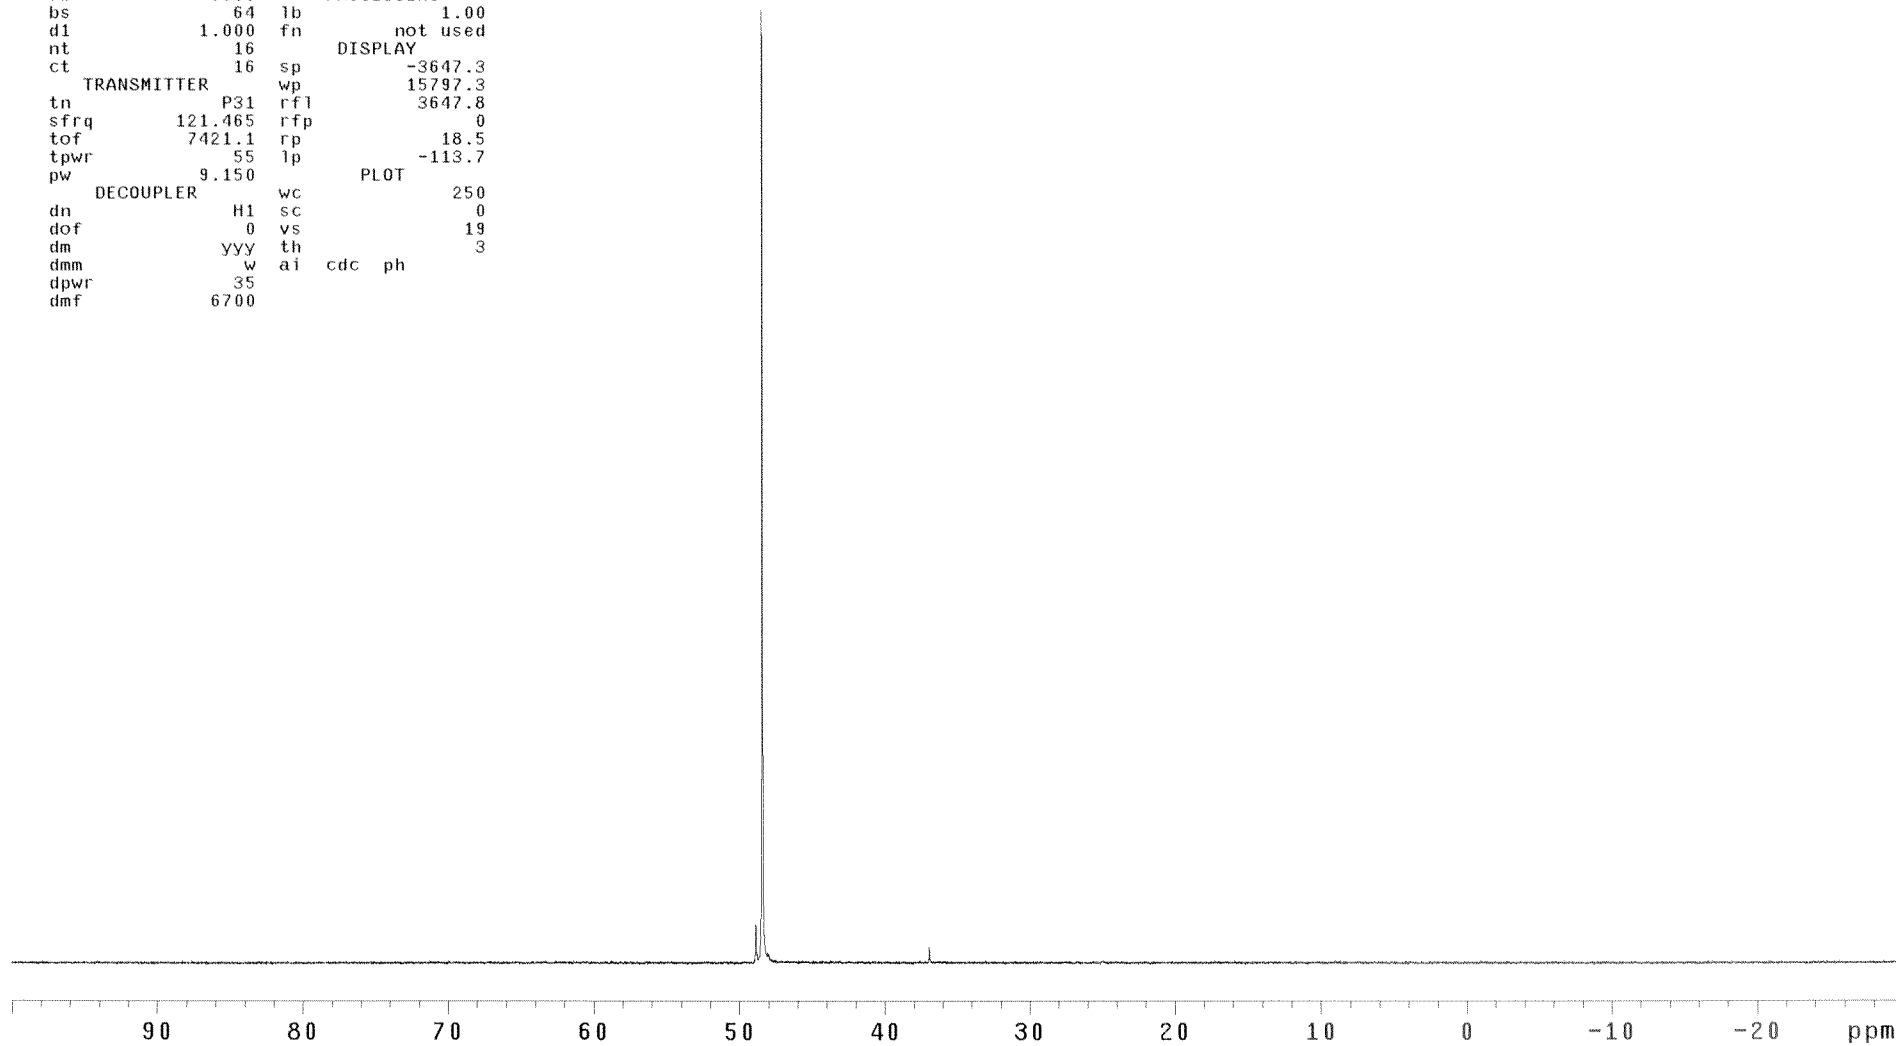

OB 877f2

exp1 Phosphorus

| SAMPLE               |                | SPECIAL |          |
|----------------------|----------------|---------|----------|
| date                 | Dec 19 2012    | temp    | not used |
| solvent              | cdcl3          | gain    | 20       |
| file                 | /home/TCUuser~ | spin    | 20       |
| /vnmr/sys/data/auto~ |                | hst     | 0.008    |
| _2012.12.14/s_2012~  |                | pw90    | 18.300   |
| 1219_28/data/cdcl3~  |                | alfa    | 10.000   |

| ACQUISITION |         | FLAGS      |          |
|-------------|---------|------------|----------|
| sw          | 15797.8 | il         | n        |
| at          | 1.600   | in         | n        |
| np          | 50552   | dp         | y        |
| fb          | 8800    | hs         | ny       |
| bs          | 64      | PROCESSING |          |
| d1          | 1.000   | lb         | 1.00     |
| nt          | 16      | fn         | not used |
| ct          | 16      | DISPLAY    |          |
| TRANSMITTER |         | sp         | -3647.3  |
| tn          | P31     | wp         | 15797.3  |
| sfrq        | 121.465 | rfl        | 3647.8   |
| tof         | 7421.1  | rfp        | 0        |
| tpwr        | 55      | rp         | 26.9     |
| pw          | 9.150   | lp         | -113.7   |
| DECOUPLER   |         | PLOT       |          |
| dn          | H1      | wc         | 250      |
| dof         | 0       | sc         | 0        |
| dm          | ynn     | vs         | 115      |
| dmm         | w       | th         | 4        |
| dpwr        | 35      | ai         | cdc ph   |
| dmf         | 6700    |            |          |

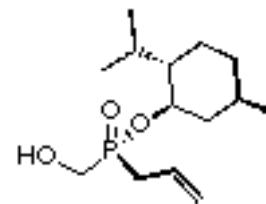

Compound (R<sub>p</sub>)-11  
<sup>31</sup>P/<sup>1</sup>H NMR coupled

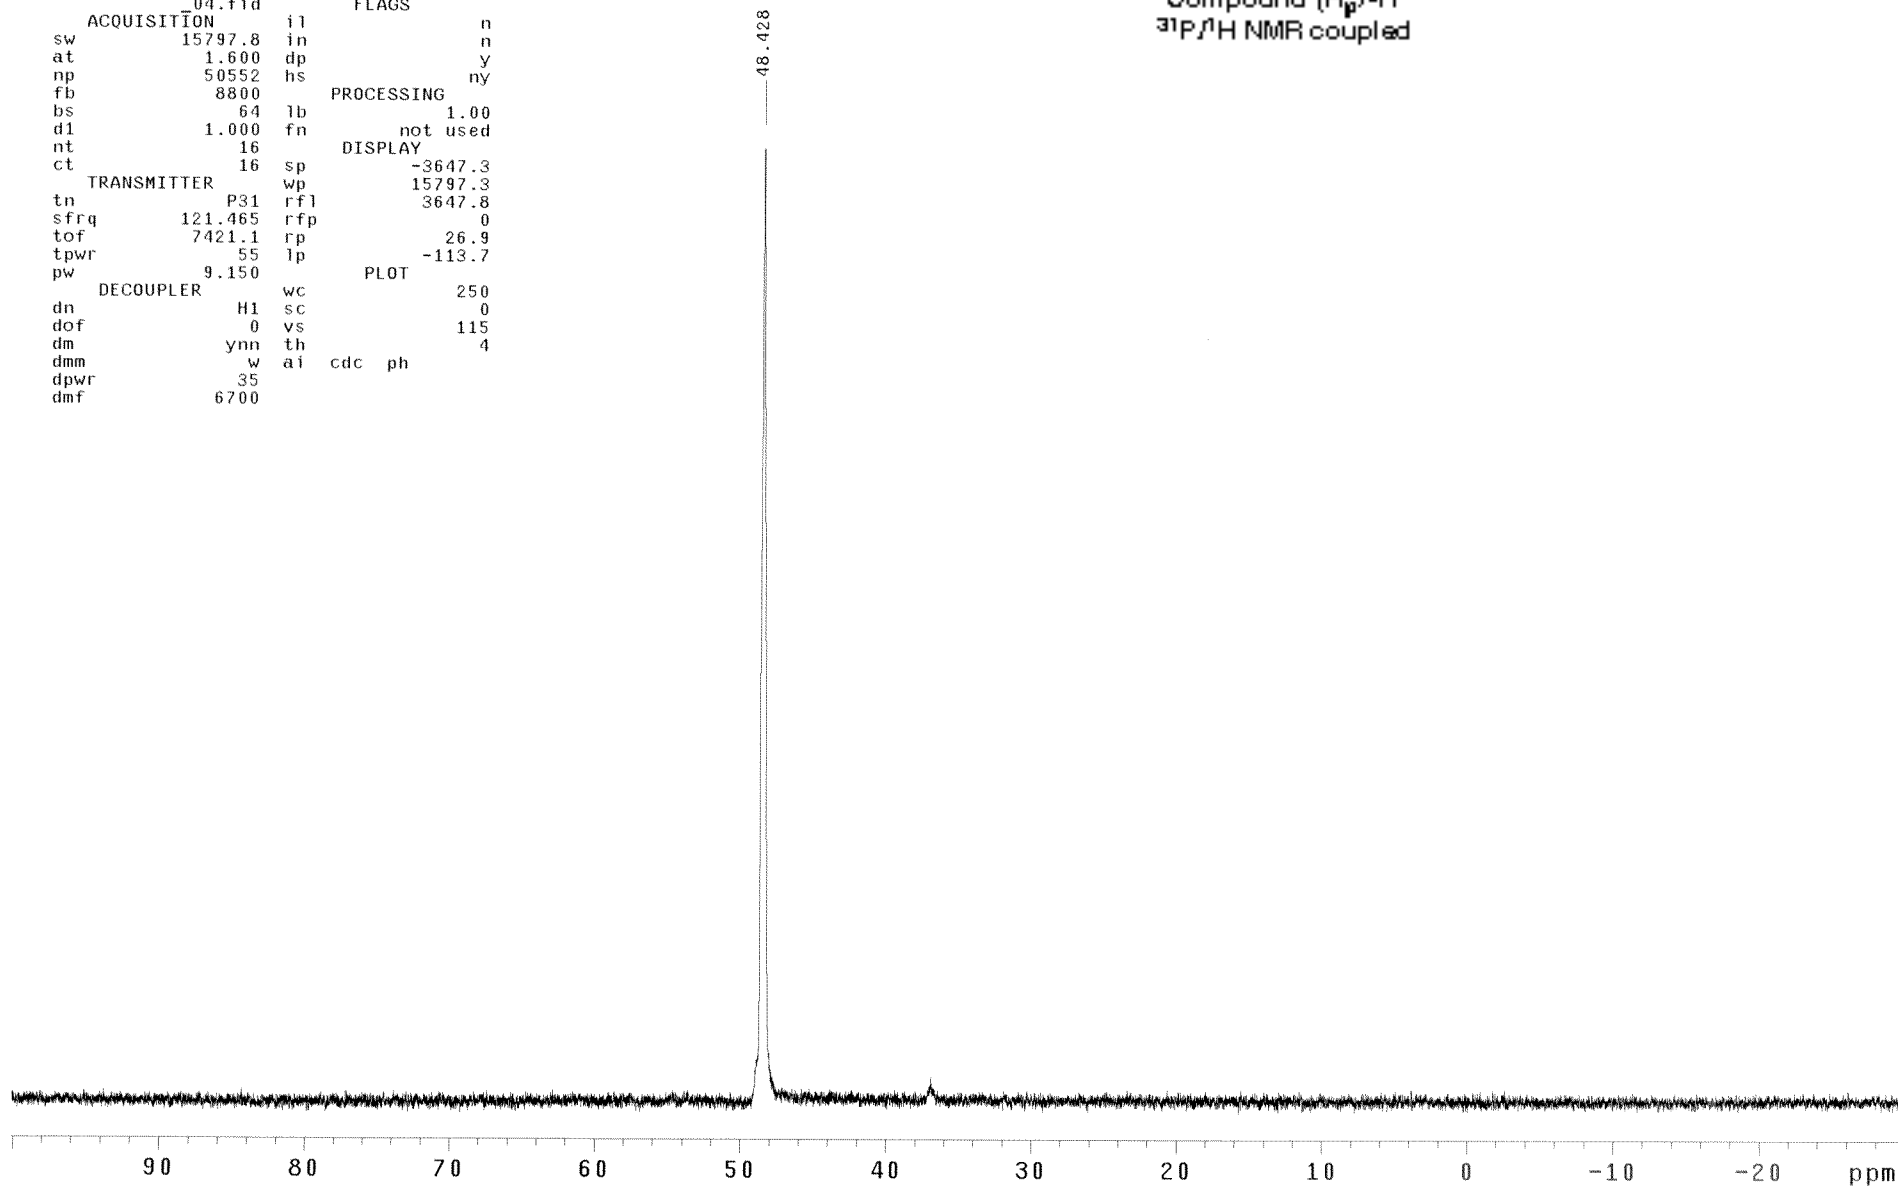

OB 877f1  
pad=10 run with findz0 before acquisition

exp1 Proton

```
SAMPLE          DEC. & VT
date   Dec 19 2012  dfrq      75.454
solvent  cdc13      dn        C13
file    /home/TCUuser~ dpwr     43
/vnmrsys/data/auto~ dof      0
_2012.12.14/s_2012~ dm       nnn
I219_26/data/cdc13~ dmm      c
_01.fid      dmf      13100

ACQUISITION     PROCESSING
sfrq      300.047  wtfile
tn         H1     proc      ft
at         1.998  fn       not used
np         19184
sw         4800.8  werr      xmreact
fb         2600   wexp abortoff flus~
bs         16     h procplot aborton
tpwr       55     wbs
pw         7.9    wnt
dl         1.000
tof        277.9
nt         8
ct         8
alock      y
gain       not used

FLAGS
il         n
in         n
dp         y

DISPLAY
sp        -594.2
wp        4800.5
vs         196
sc         0
wc         240
hzmm      20.00
is        444.09
rf1       594.5
rfp        0
th         2
ins       1.000
ai cdc ph
```

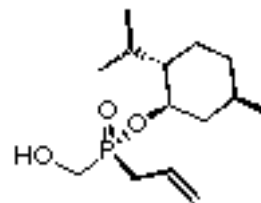

Compound (R<sub>p</sub>)-11  
<sup>1</sup>H NMR

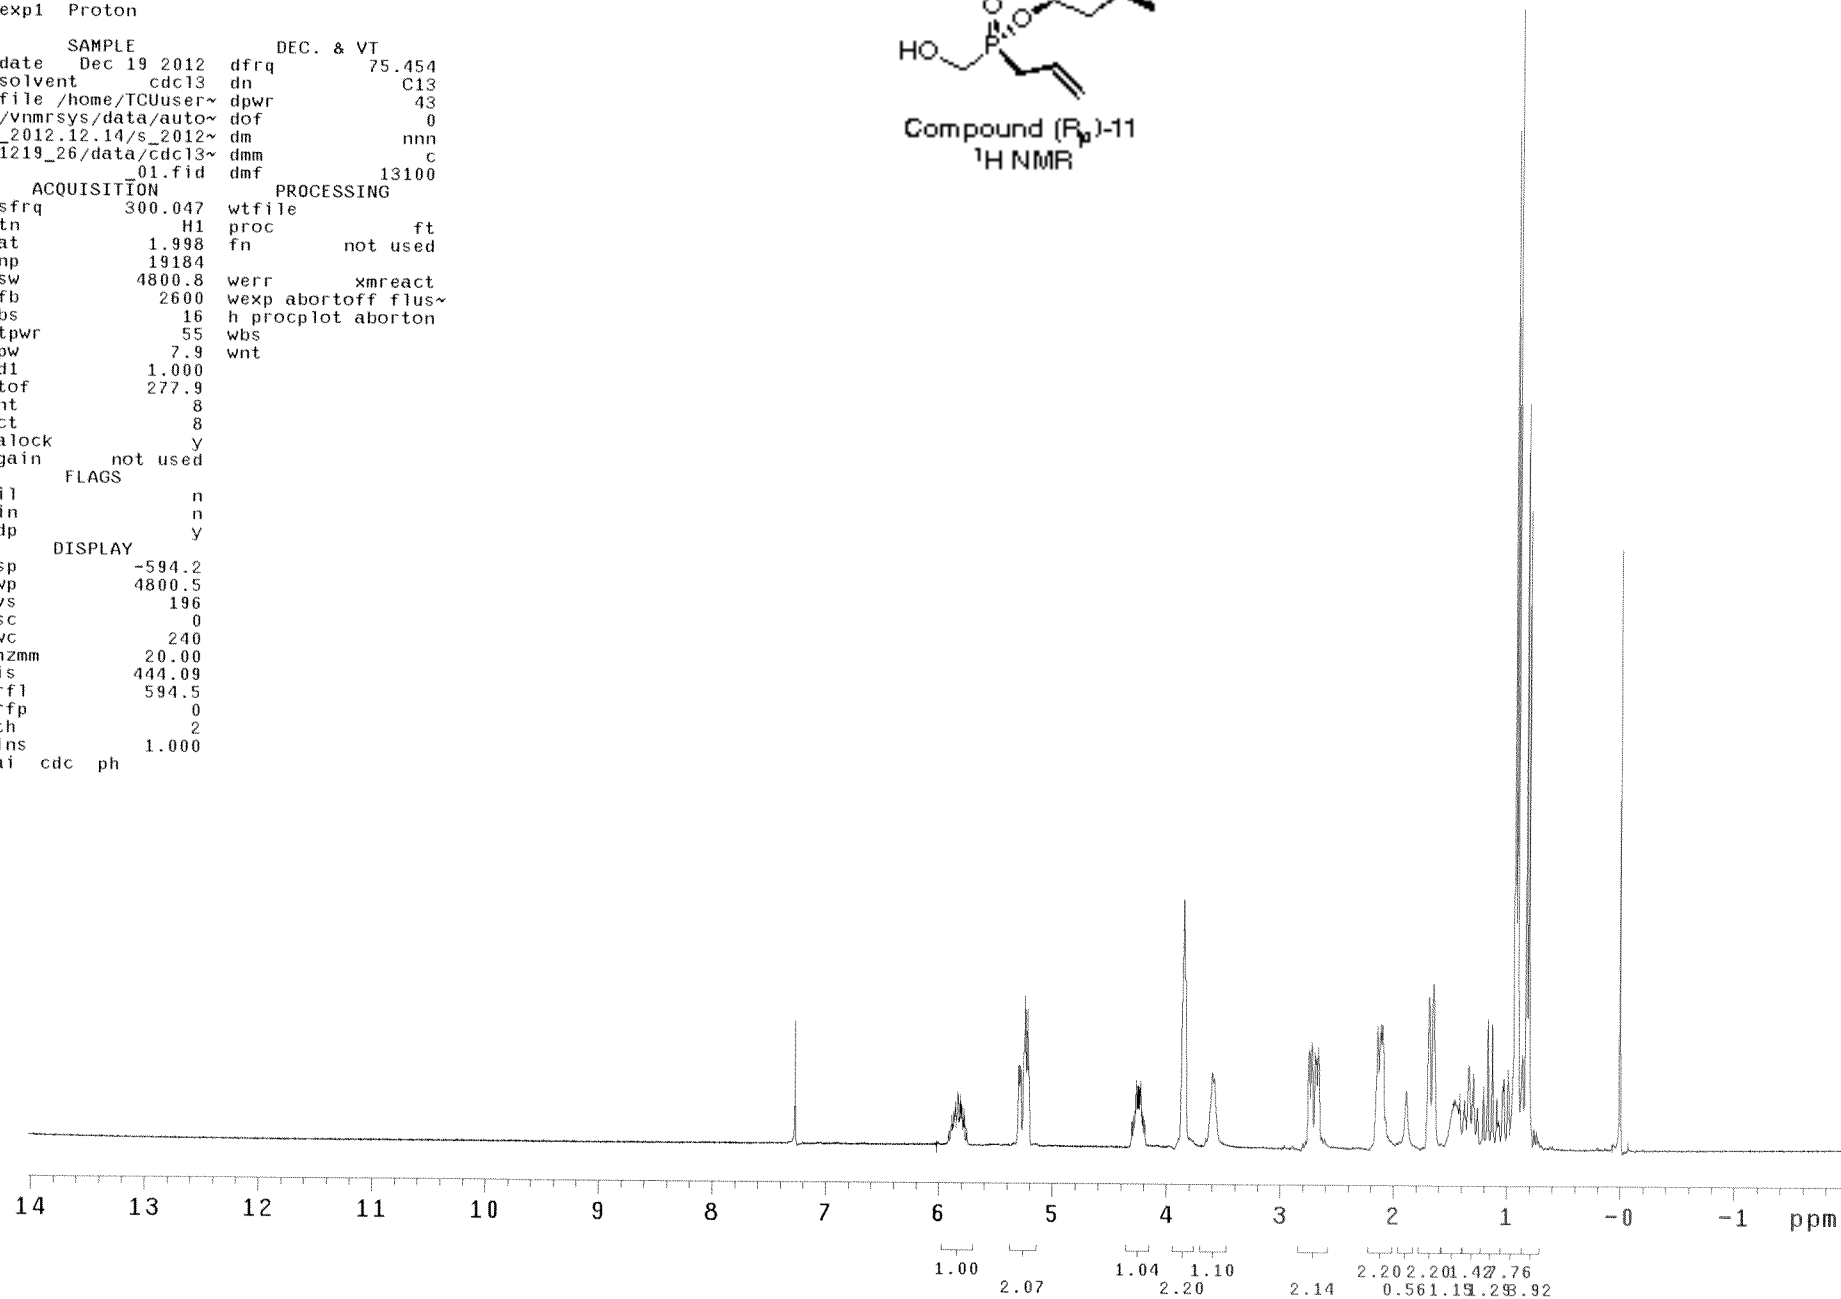

OB 877f2

expl Carbon

| SAMPLE              |                | SPECIAL    |          |
|---------------------|----------------|------------|----------|
| date                | Dec 19 2012    | temp       | not used |
| solvent             | cdc13          | gain       | 20       |
| file                | /home/TCUuser~ | spin       | 20       |
| /vnmrsys/data/auto~ |                | hst        | 0.008    |
| _2012.12.14/s_2012~ |                | pw90       | 18.500   |
| 1219_28/data/cdc13~ |                | alfa       | 10.000   |
| _05.fid             |                | FLAGS      |          |
| ACQUISITION         |                | PROCESSING |          |
| sw                  | 18115.9        | il         | n        |
| at                  | 1.301          | in         | n        |
| np                  | 47120          | dp         | y        |
| fb                  | 10000          | hs         | nn       |
| bs                  | 64             | lb         | 0.50     |
| d1                  | 2.000          | fn         | not used |
| nt                  | 1800           | DISPLAY    |          |
| ct                  | 1800           | sp         | -1135.5  |
| TRANSMITTER         |                | wp         | 18115.4  |
| tn                  | C13            | rfl        | 1136.1   |
| sfrq                | 75.454         | rfp        | 0        |
| tof                 | 766.0          | rp         | -2.0     |
| tpwr                | 58             | lp         | -210.4   |
| pw                  | 9.250          | PLOT       |          |
| DECOUPLER           |                | wc         | 250      |
| dn                  | H1             | sc         | 0        |
| dof                 | 0              | vs         | 513      |
| dm                  | yyy            | th         | 8        |
| dmm                 | w              | ai         | cdc ph   |
| dpwr                | 35             |            |          |
| dmf                 | 6700           |            |          |

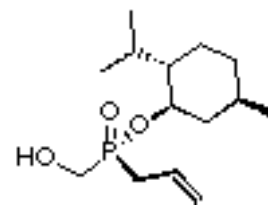

Compound (F<sub>p</sub>)-11  
<sup>13</sup>C NMR

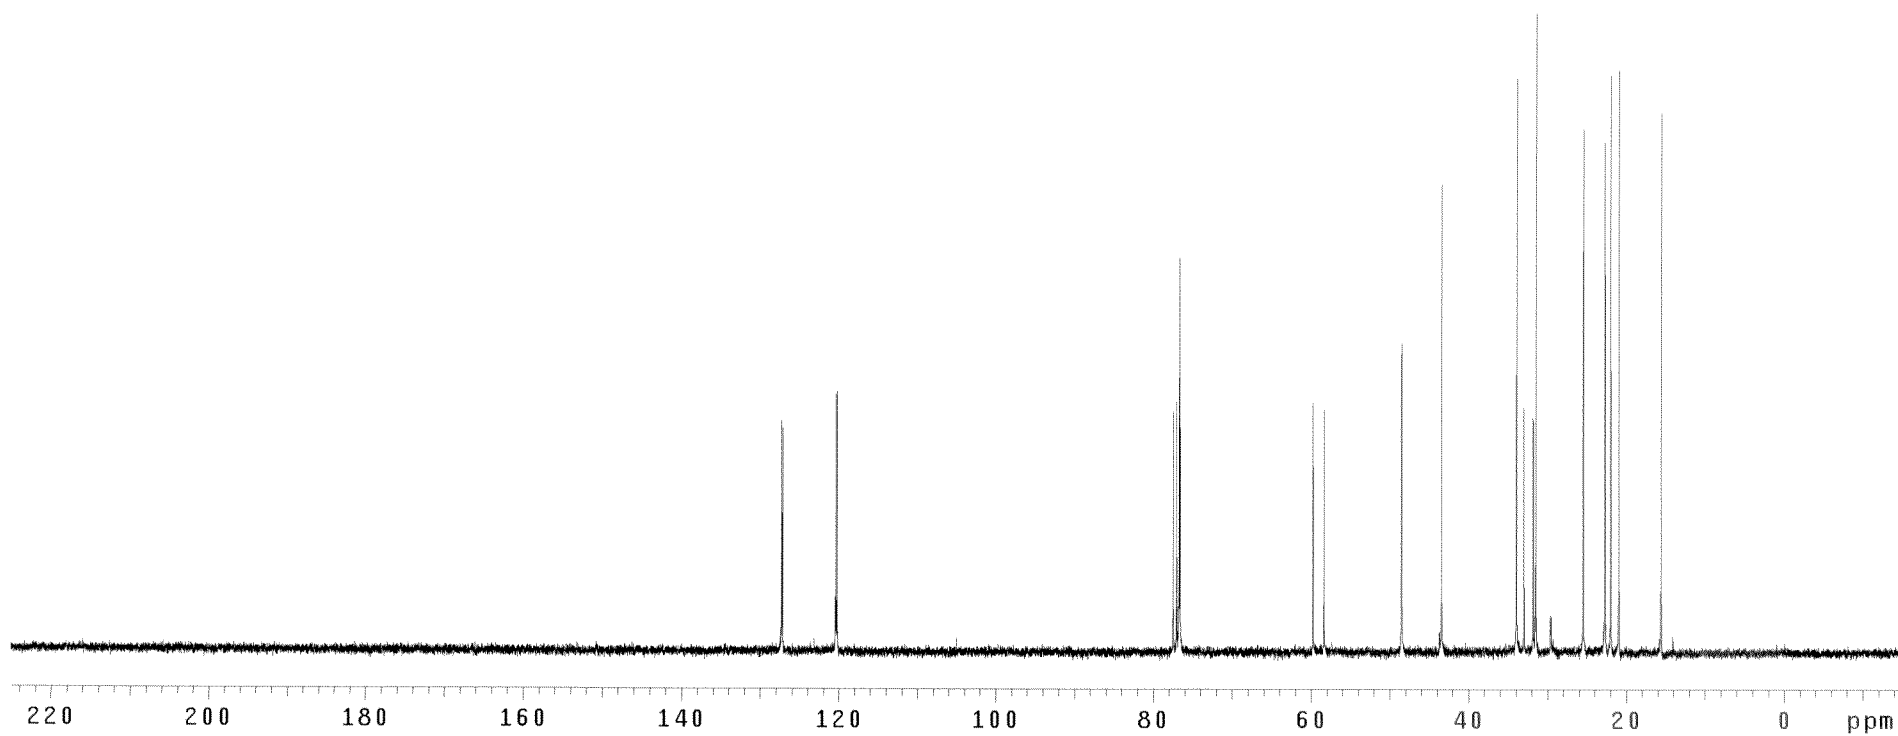

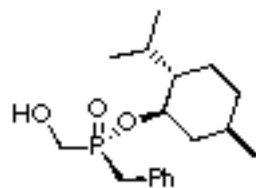

Compound (R<sub>p</sub>)-12  
<sup>31</sup>P/<sup>1</sup>H NMR decoupled

Current Data Parameters  
 NAME OB 1614 after column  
 EXPNO 1  
 PROCNO 1

F2 - Acquisition Parameters  
 Date\_ 20140805  
 Time 9.06  
 INSTRUM spect  
 PROBHD 5 mm PABBO BB/  
 PULPROG zgpg30  
 TD 65536  
 SOLVENT CDCl3  
 NS 16  
 DS 4  
 SWH 64102.563 Hz  
 FIDRES 0.978127 Hz  
 AQ 0.5111808 sec  
 RG 203.57  
 DW 7.800 usec  
 DE 6.50 usec  
 TE 295.4 K  
 D1 2.00000000 sec  
 D11 0.03000000 sec  
 TD0 1

==== CHANNEL f1 =====  
 SFO1 161.9674942 MHz  
 NUC1 31P  
 P1 14.25 usec  
 PLW1 15.00000000 W

==== CHANNEL f2 =====  
 SFO2 400.1316005 MHz  
 NUC2 1H  
 CPDPRG[2] waltz16  
 PCPD2 90.00 usec  
 PLW2 10.00000000 W  
 PLW12 0.31604999 W  
 PLW13 0.25600001 W

F2 - Processing parameters  
 SI 32768  
 SF 161.9755930 MHz  
 WDW EM  
 SSB 0  
 LB 1.00 Hz  
 GB 0  
 PC 1.40

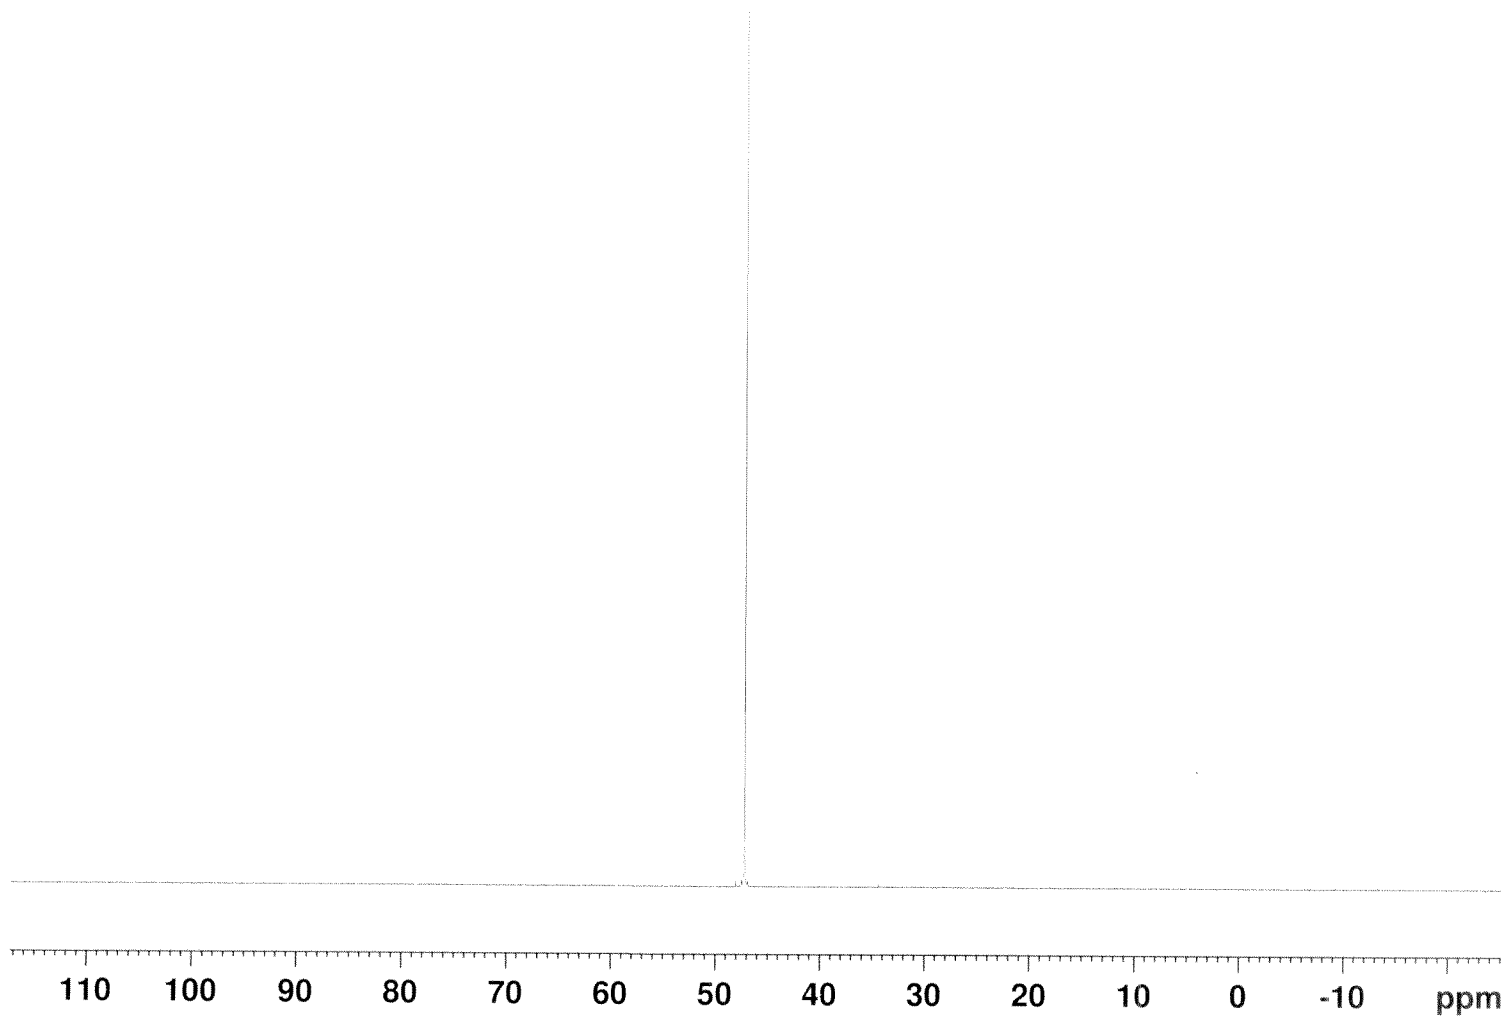

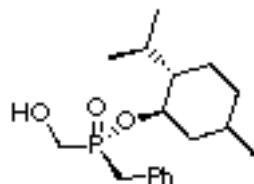

Compound (Rp)-12  
<sup>31</sup>P/<sup>1</sup>H NMR coupled

Current Data Parameters  
 NAME OB 1614 after column  
 EXPNO 2  
 PROCNO 1

F2 - Acquisition Parameters  
 Date\_ 20140805  
 Time 9.08  
 INSTRUM spect  
 PROBHD 5 mm PABBO BE/  
 PULPROG zg30  
 ID 65536  
 SOLVENT CDCl3  
 NS 32  
 DS 4  
 SWH 64102.563 Hz  
 FIDRES 0.978127 Hz  
 AQ 0.5111808 sec  
 RG 203.57  
 DW 7.800 usec  
 DE 6.50 usec  
 TE 295.0 K  
 D1 2.00000000 sec  
 TD0 1

==== CHANNEL f1 =====  
 SF01 161.9674942 MHz  
 NUC1 31P  
 P1 14.25 usec  
 PLW1 15.00000000 W

F2 - Processing parameters  
 SI 32768  
 SF 161.9755930 MHz  
 WDW EM  
 SSB 0  
 LB 1.00 Hz  
 GB 0  
 PC 1.40

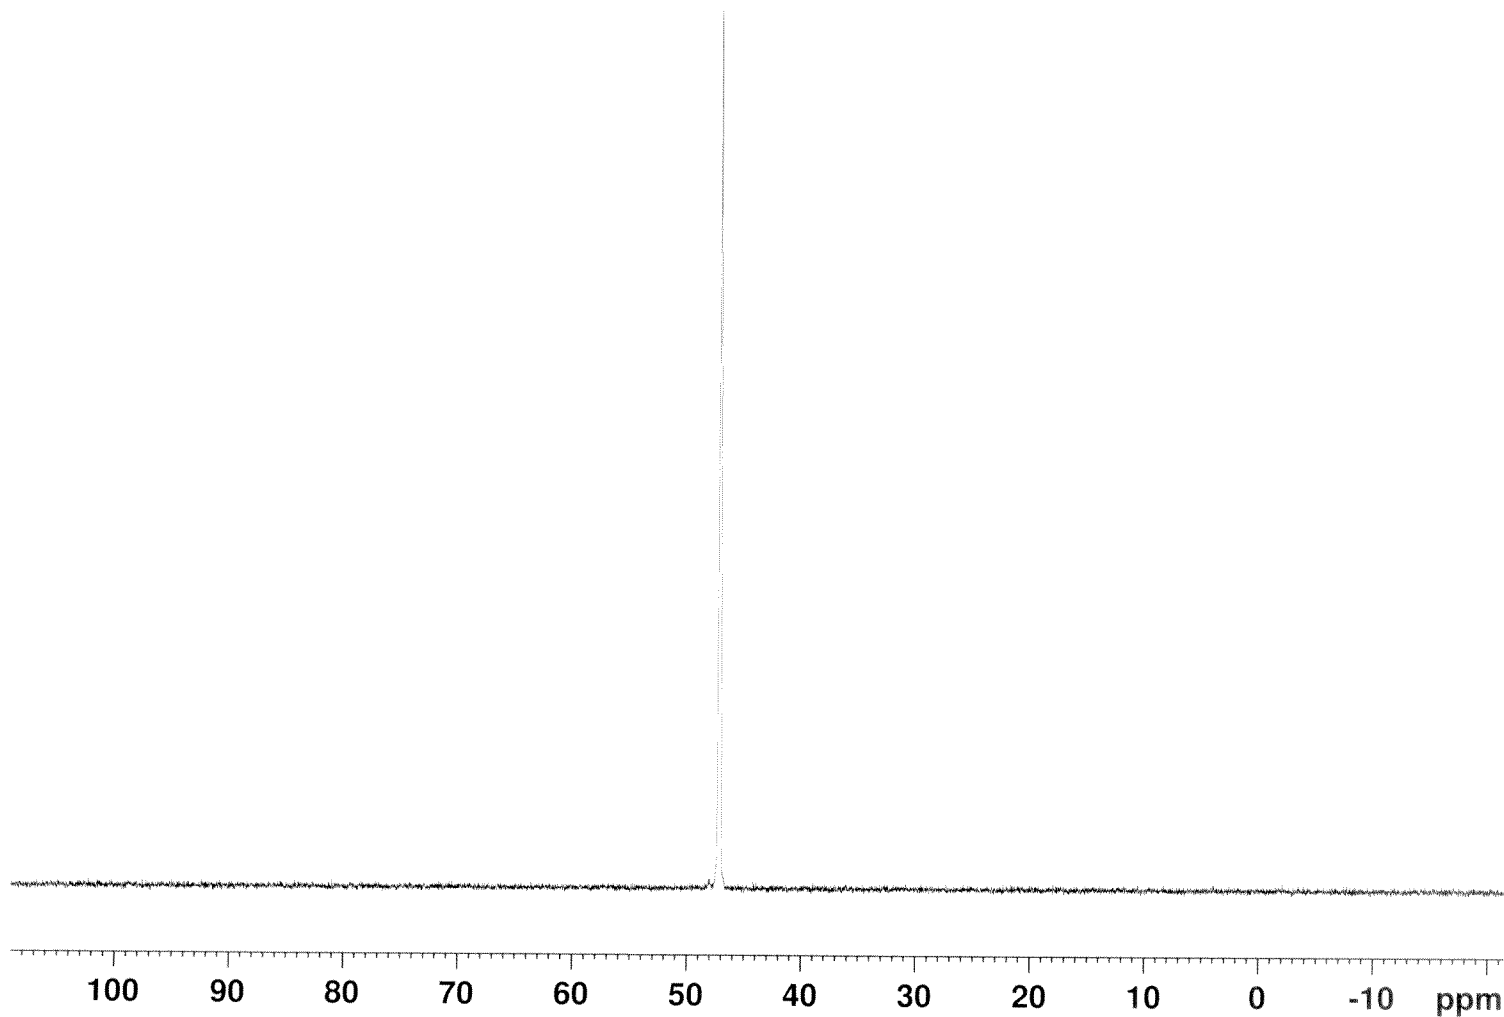



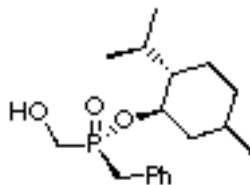

Compound (R<sub>v</sub>)-12  
<sup>1</sup>H NMR

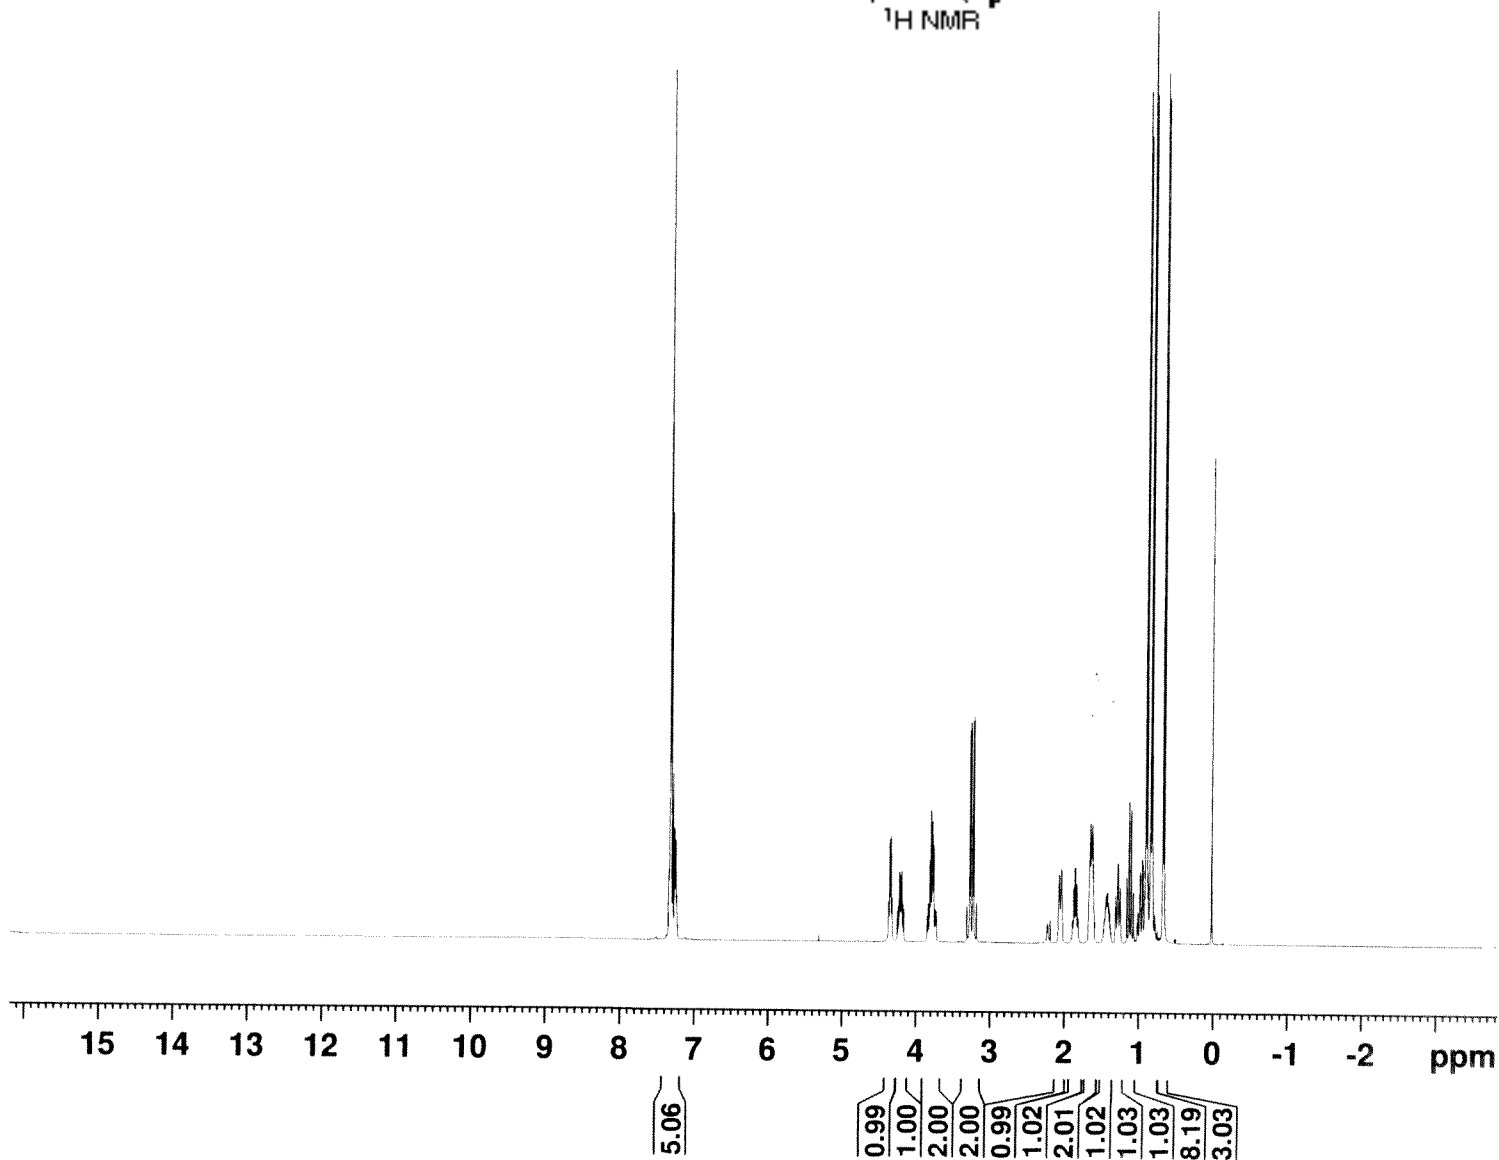

Current Data Parameters  
 NAME OB 1614 after column  
 EXPNO 3  
 PROCNO 1

F2 - Acquisition Parameters  
 Date\_ 20140805  
 Time 9.11  
 INSTRUM spect  
 PROBHD 5 mm PABBO BB/  
 PULPROG zg30  
 TD 65536  
 SOLVENT CDC13  
 NS 16  
 DS 2  
 SWH 8012.820 Hz  
 FIDRES 0.122266 Hz  
 AQ 4.0894465 sec  
 RG 32.38  
 DW 62.400 usec  
 DE 6.50 usec  
 TE 294.9 K  
 D1 1.0000000 sec  
 TD0 1

===== CHANNEL f1 =====  
 SFO1 400.1324710 MHz  
 NUC1 1H  
 P1 10.00 usec  
 PLW1 25.00300026 W

F2 - Processing parameters  
 SI 65536  
 SF 400.1300000 MHz  
 WDW EM  
 SSB 0  
 LB 0.30 Hz  
 GB 0  
 PC 1.00

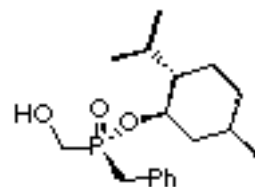

Compound (R<sub>p</sub>)-12  
<sup>13</sup>C NMR

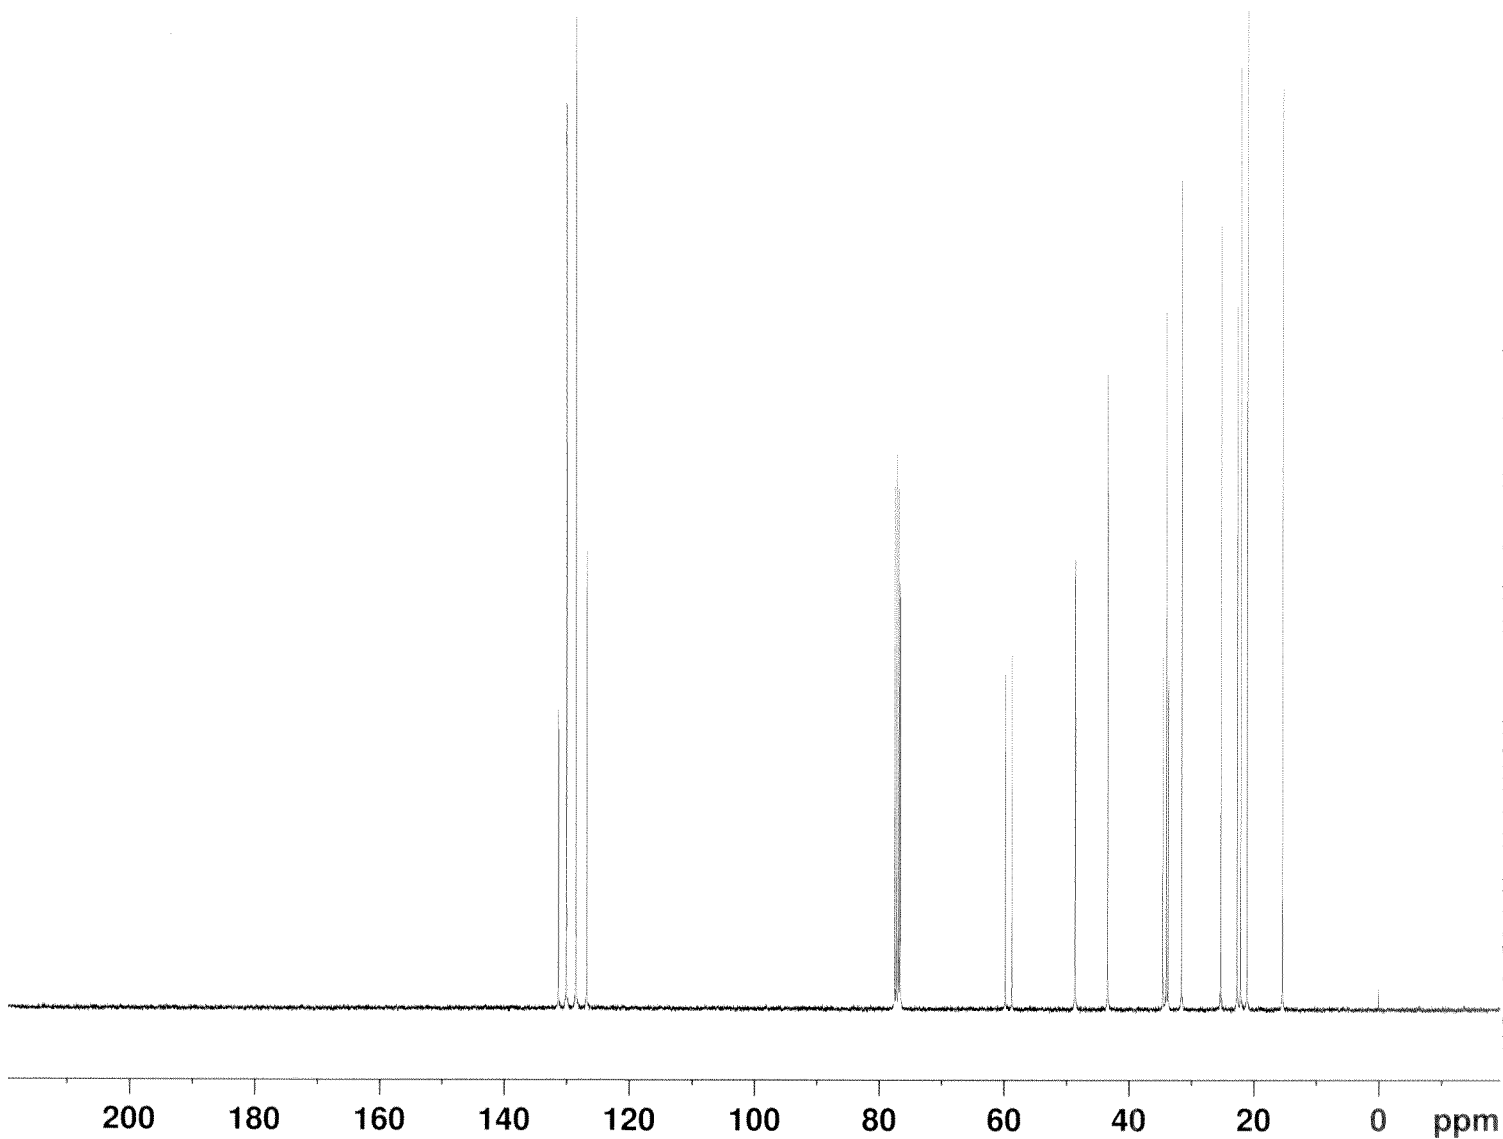

Current Data Parameters  
 NAME OB 1614 after column  
 EXPNO 4  
 PROCNO 1

F2 - Acquisition Parameters  
 Date\_ 20140805  
 Time 19.59  
 INSTRUM spect  
 PROBHD 5 mm PABBO BB/  
 PULPROG zgpg30  
 TD 65536  
 SOLVENT CDCl3  
 NS 456  
 DS 4  
 SWH 24038.461 Hz  
 FIDRES 0.366798 Hz  
 AQ 1.3631488 sec  
 RG 203.57  
 DW 20.800 usec  
 DE 6.50 usec  
 TE 295.6 K  
 D1 2.00000000 sec  
 D11 0.03000000 sec  
 TD0 1

==== CHANNEL f1 =====  
 SFO1 100.6228293 MHz  
 NUC1 13C  
 P1 10.00 usec  
 PLW1 45.00000000 W

==== CHANNEL f2 =====  
 SFO2 400.1316005 MHz  
 NUC2 1H  
 CPDPRG[2] waltz16  
 PCPD2 90.00 usec  
 PLW2 10.00000000 W  
 PLW12 0.31604999 W  
 PLW13 0.25600001 W

F2 - Processing parameters  
 SI 32768  
 SF 100.6127685 MHz  
 WDW EM  
 SSB 0  
 LB 1.00 Hz  
 GB 0  
 PC 1.40

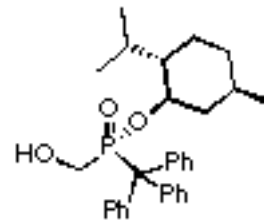

Compound (R<sub>p</sub>)-13  
<sup>31</sup>P/<sup>1</sup>H NMR decoupled

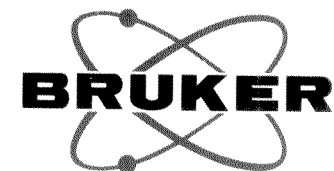

Current Data Parameters  
 NAME OB 1840f2  
 EXPNO 1  
 PROCNO 1

F2 - Acquisition Parameters  
 Date 20141120  
 Time 17.48  
 INSTRUM spect  
 PROBHD 5 mm PABBO BB/  
 PULPROG zgpg30  
 TD 65536  
 SOLVENT CDCl3  
 NS 16  
 DS 4  
 SWH 64102.563 Hz  
 FIDRES 0.978127 Hz  
 AQ 0.5111808 sec  
 RG 203.57  
 DW 7.800 usec  
 DE 6.50 usec  
 TE 296.2 K  
 D1 2.00000000 sec  
 D11 0.03000000 sec  
 TD0 1

==== CHANNEL f1 =====  
 SFO1 161.9674942 MHz  
 NUC1 31P  
 P1 14.25 usec  
 PLW1 15.00000000 W

==== CHANNEL f2 =====  
 SFO2 400.1316005 MHz  
 NUC2 1H  
 CPDPRG[2] waltz16  
 PCPD2 90.00 usec  
 PLW2 10.00000000 W  
 PLW12 0.31604999 W  
 PLW13 0.25600001 W

F2 - Processing parameters  
 SI 32768  
 SF 161.9755930 MHz  
 WDW EM  
 SSB 0  
 LB 1.00 Hz  
 GB 0  
 PC 1.40

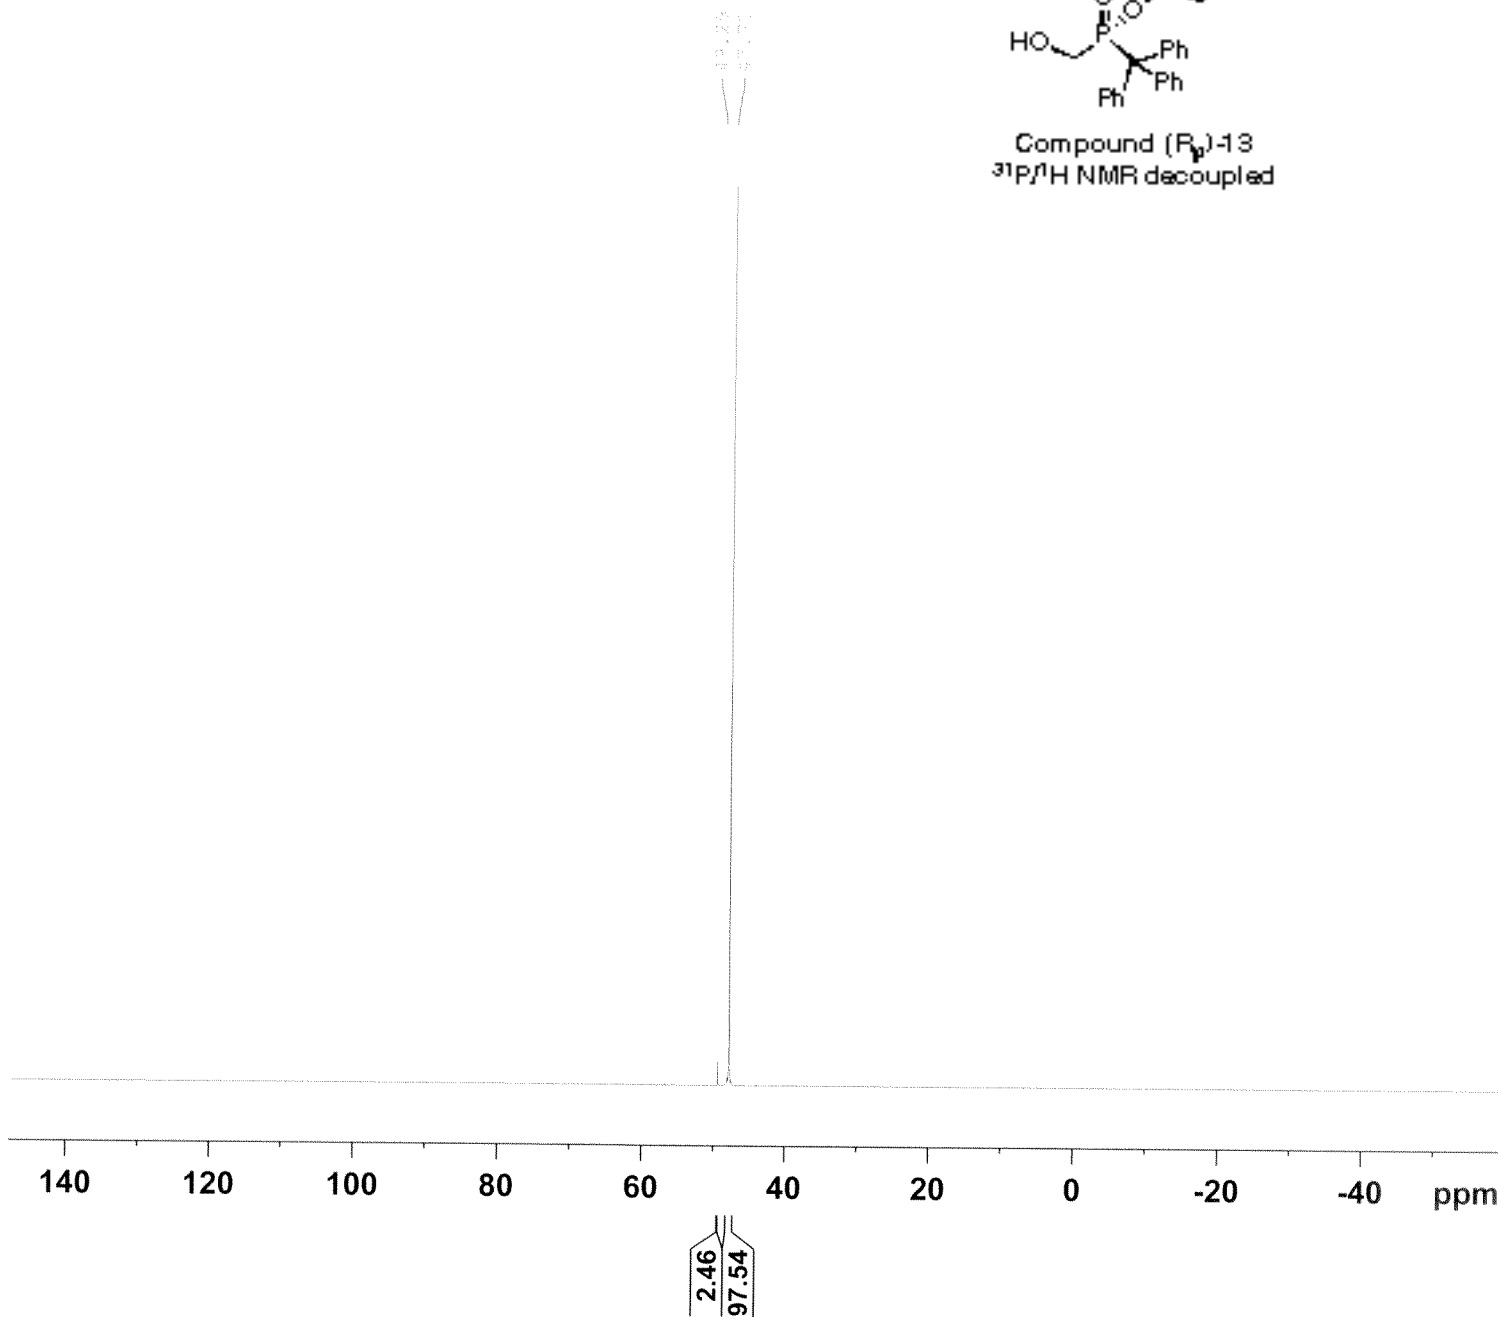

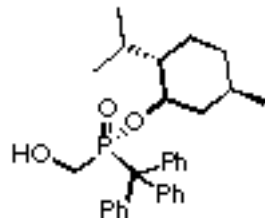

Compound (R<sub>y</sub>)-13  
<sup>31</sup>P/<sup>1</sup>H NMR coupled

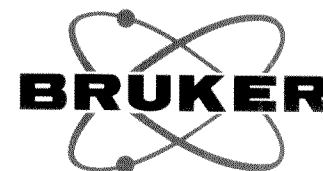

Current Data Parameters  
 NAME OB 1840f2  
 EXPNO 2  
 PROCNO 1

F2 - Acquisition Parameters  
 Date\_ 20141120  
 Time\_ 17.50  
 INSTRUM spect  
 PROBHD 5 mm PABBO BB/  
 PULPROG zg30  
 TD 65536  
 SOLVENT CDCl3  
 NS 32  
 DS 4  
 SWH 64102.563 Hz  
 FIDRES 0.978127 Hz  
 AQ 0.5111808 sec  
 RG 203.57  
 DW 7.800 usec  
 DE 6.50 usec  
 TE 295.6 K  
 D1 2.0000000 sec  
 TD0 1

===== CHANNEL f1 =====  
 SF01 161.9674942 MHz  
 NUC1 31P  
 P1 14.25 usec  
 PLW1 15.00000000 W

F2 - Processing parameters  
 SI 32768  
 SF 161.9755930 MHz  
 WDW EM  
 SSB 0  
 LB 1.00 Hz  
 GB 0  
 PC 1.40

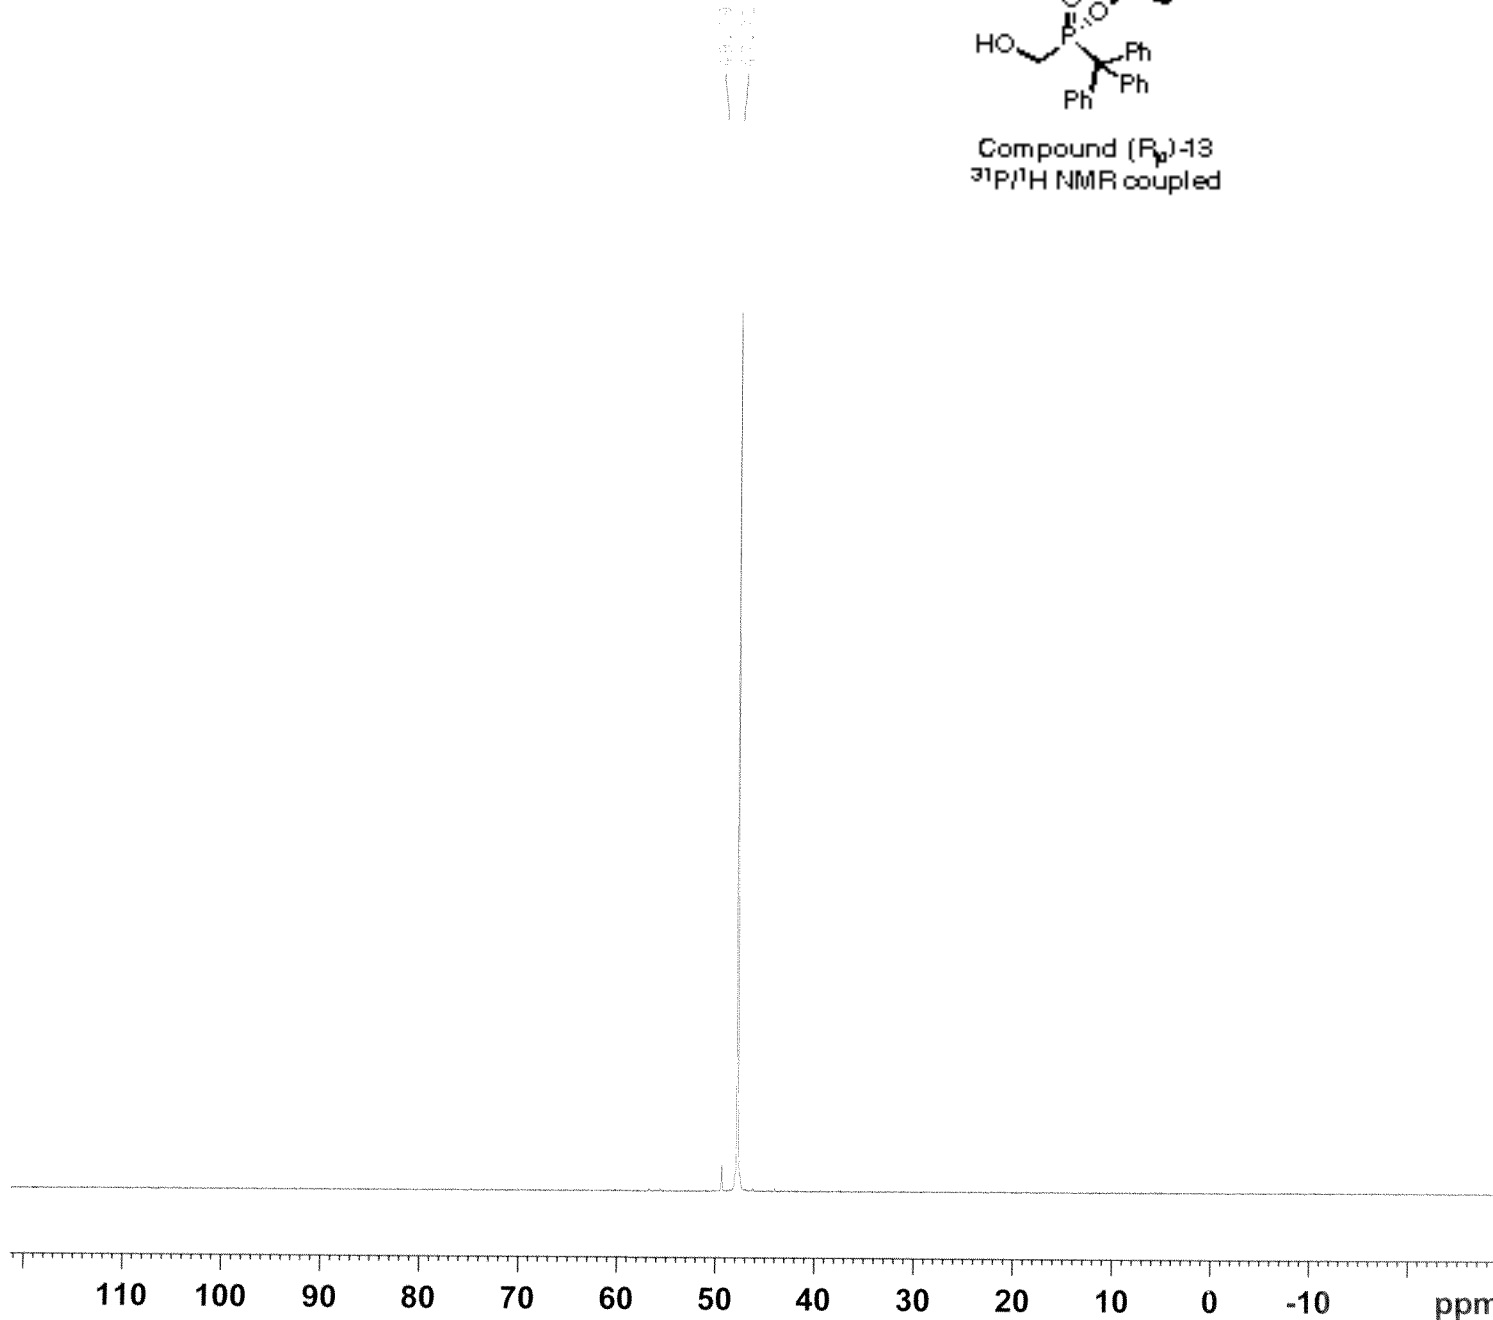

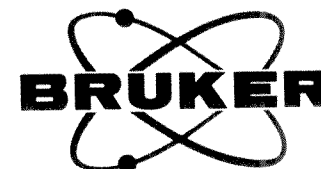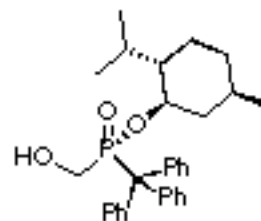

Compound (R<sub>p</sub>)-13  
<sup>1</sup>H NMR

Current Data Parameters  
NAME OB 1840f2  
EXPNO 3  
PROCNO 1

F2 - Acquisition Parameters  
Date\_ 20141120  
Time\_ 17.51  
INSTRUM spect  
PROBHD 5 mm PABBO BB/  
PULPROG zg30  
TD 65536  
SOLVENT CDCl3  
NS 8  
DS 2  
SWH 8012.820 Hz  
FIDRES 0.122266 Hz  
AQ 4.0894465 sec  
RG 13.94  
DW 62.400 usec  
DE 6.50 usec  
TE 295.5 K  
D1 1.00000000 sec  
TD0 1

==== CHANNEL f1 =====  
SFO1 400.1324710 MHz  
NUC1 1H  
P1 10.00 usec  
PLW1 25.00300026 W

F2 - Processing parameters  
SI 65536  
SF 400.1300000 MHz  
WDW EM  
SSB 0  
LB 0.30 Hz  
GB 0  
PC 1.00

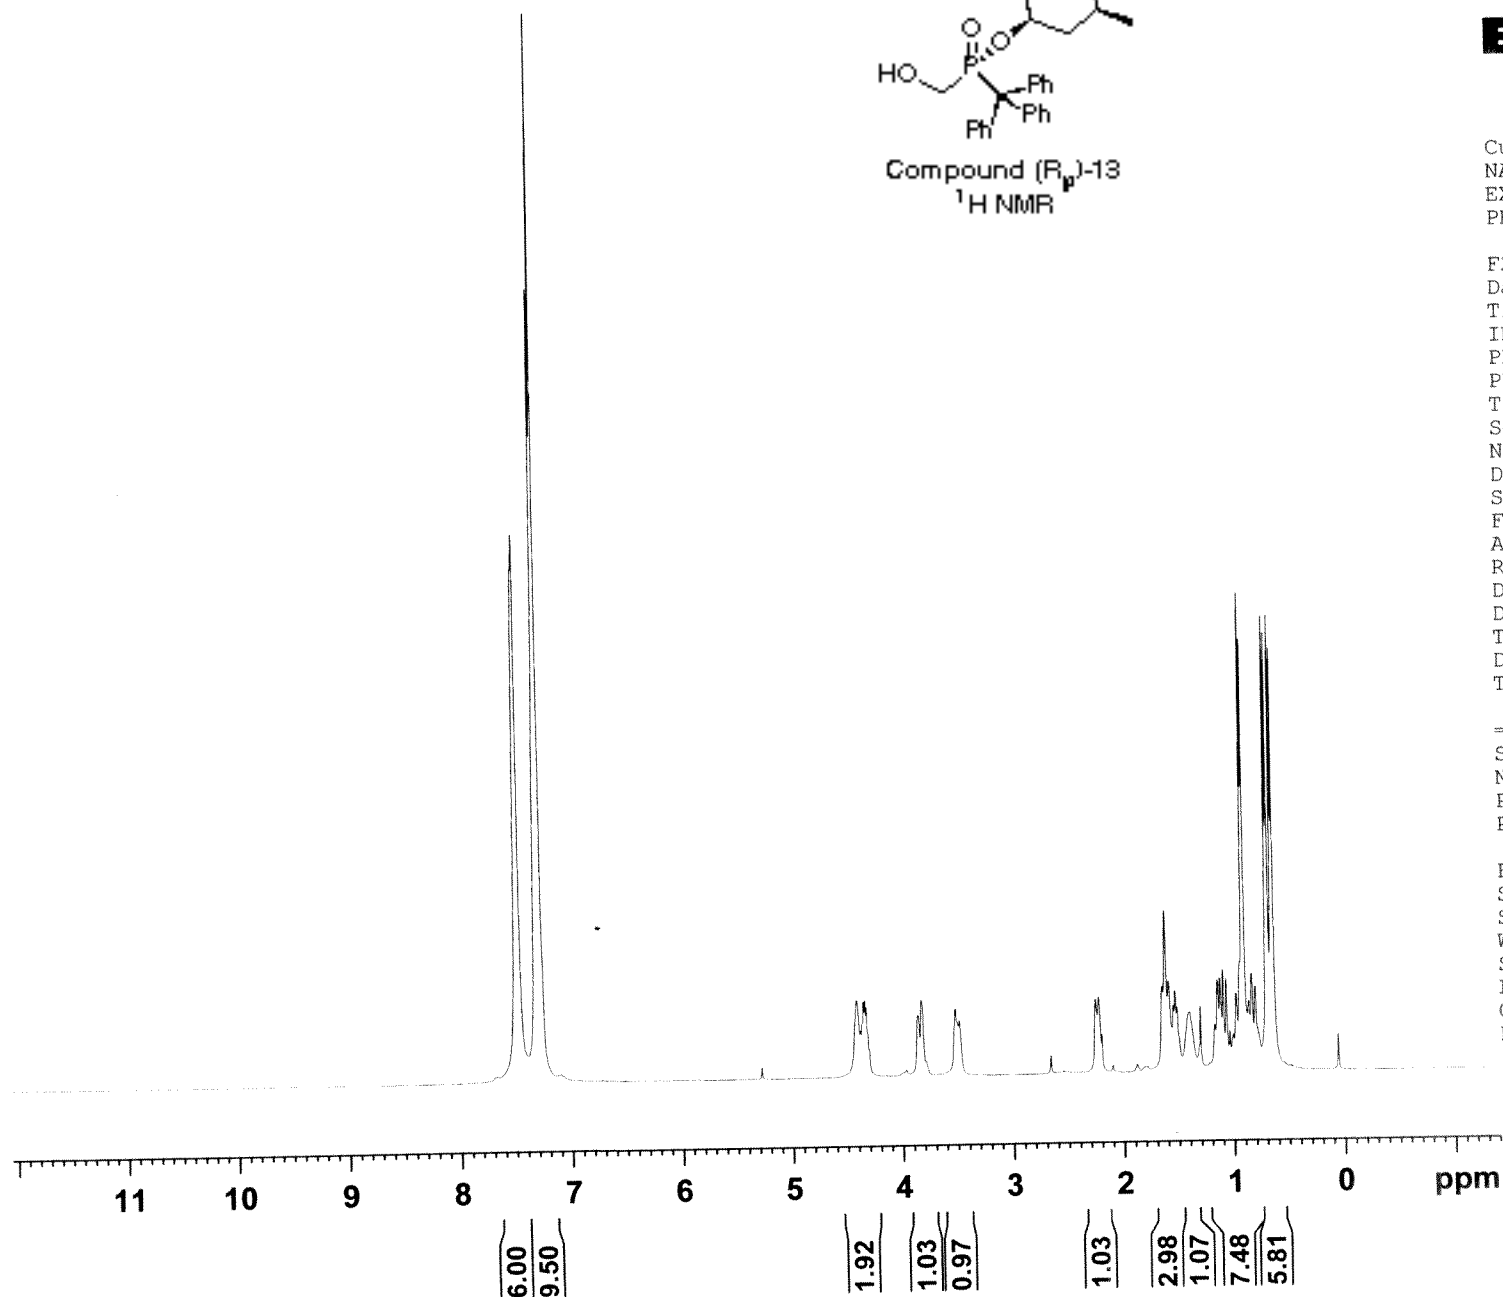

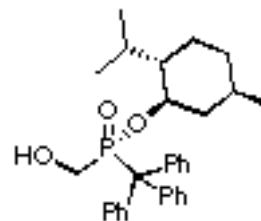

Compound (R<sub>p</sub>)-13  
<sup>13</sup>C NMR

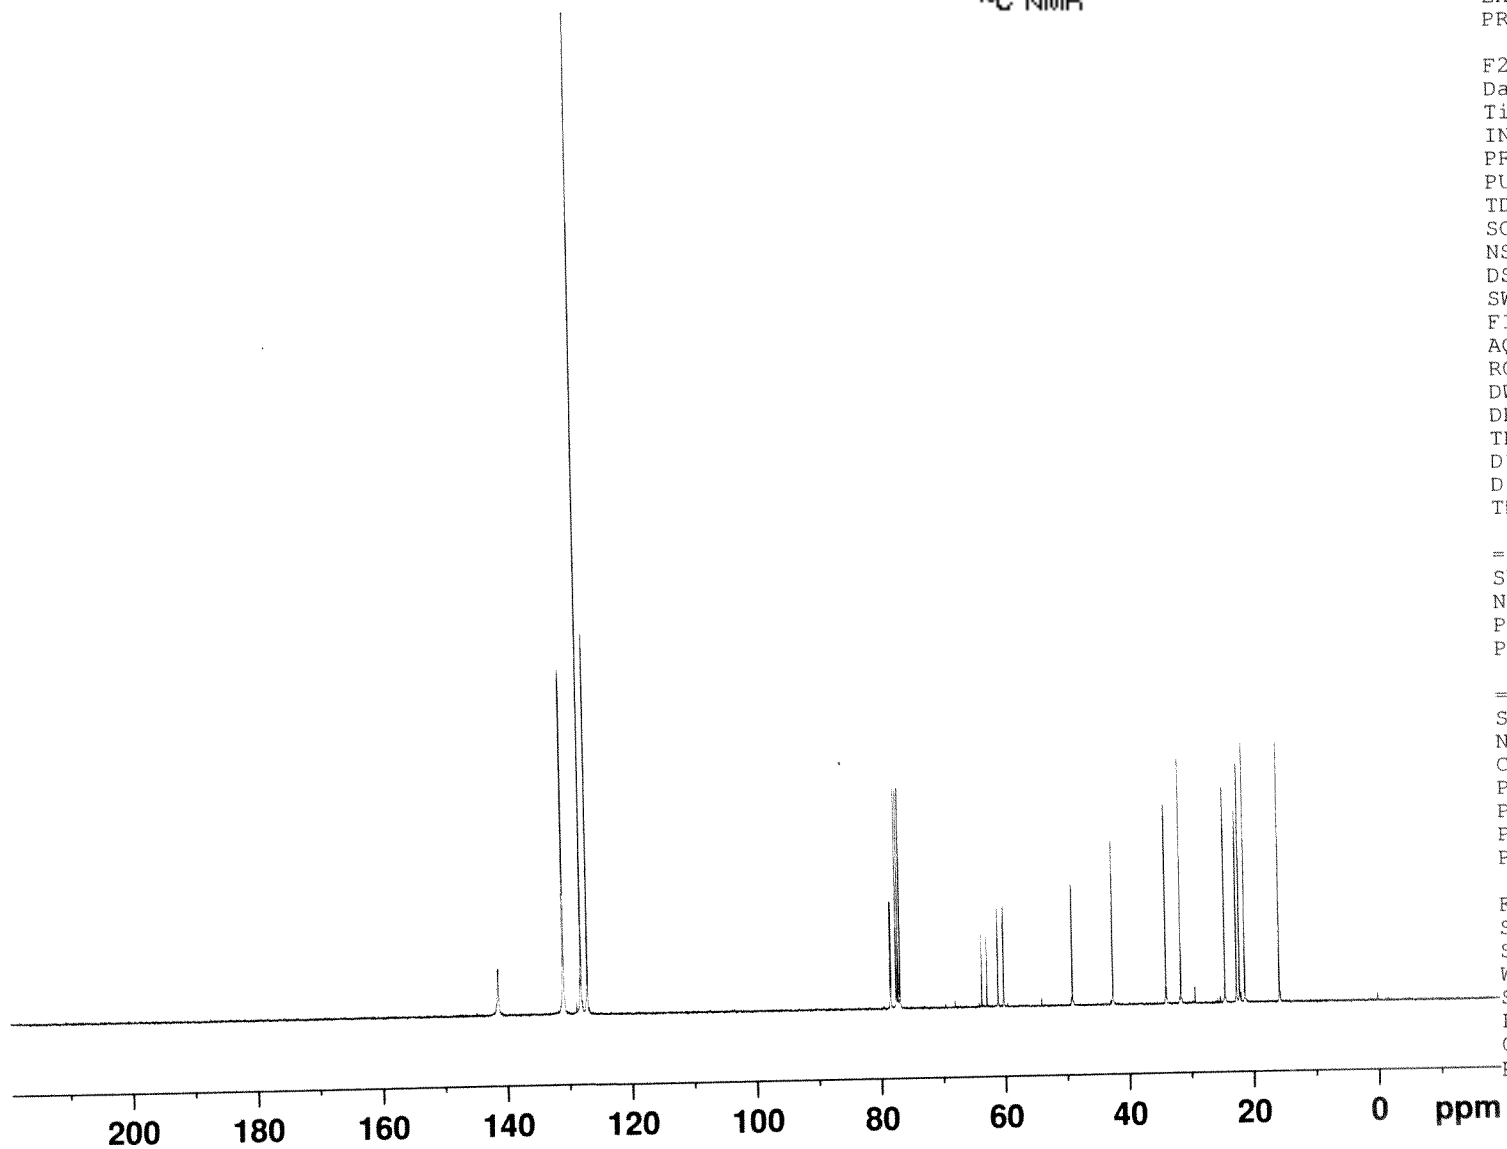

Current Data Parameters  
 NAME OB 1840f2  
 EXPNO 4  
 PROCNO 1

F2 - Acquisition Parameters  
 Date\_ 20141120  
 Time 17.44  
 INSTRUM spect  
 PROBHD 5 mm PABBO BB/  
 PULPROG zgpg30  
 TD 65536  
 SOLVENT CDCl<sub>3</sub>  
 NS 682  
 DS 4  
 SWH 24038.461 Hz  
 FIDRES 0.366798 Hz  
 AQ 1.3631488 sec  
 RG 203.57  
 DW 20.800 usec  
 DE 6.50 usec  
 TE 296.9 K  
 D1 2.00000000 sec  
 D11 0.03000000 sec  
 TD0 1

==== CHANNEL f1 =====  
 SFO1 100.6228293 MHz  
 NUC1 13C  
 P1 10.00 usec  
 PLW1 45.00000000 W

==== CHANNEL f2 =====  
 SFO2 400.1316005 MHz  
 NUC2 1H  
 CPDPRG[2] waltz16  
 PCPD2 90.00 usec  
 PLW2 10.00000000 W  
 PLW12 0.31604999 W  
 PLW13 0.25600001 W

F2 - Processing parameters  
 SI 32768  
 SF 100.6127685 MHz  
 WDW EM  
 SSB 0  
 LB 1.00 Hz  
 GB 0  
 PC 1.40

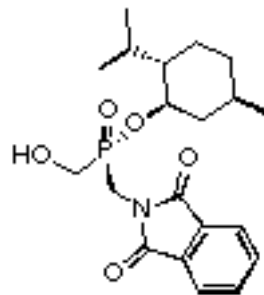

Compound (Pv)-14  
<sup>31</sup>P/<sup>1</sup>H NMR decoupled

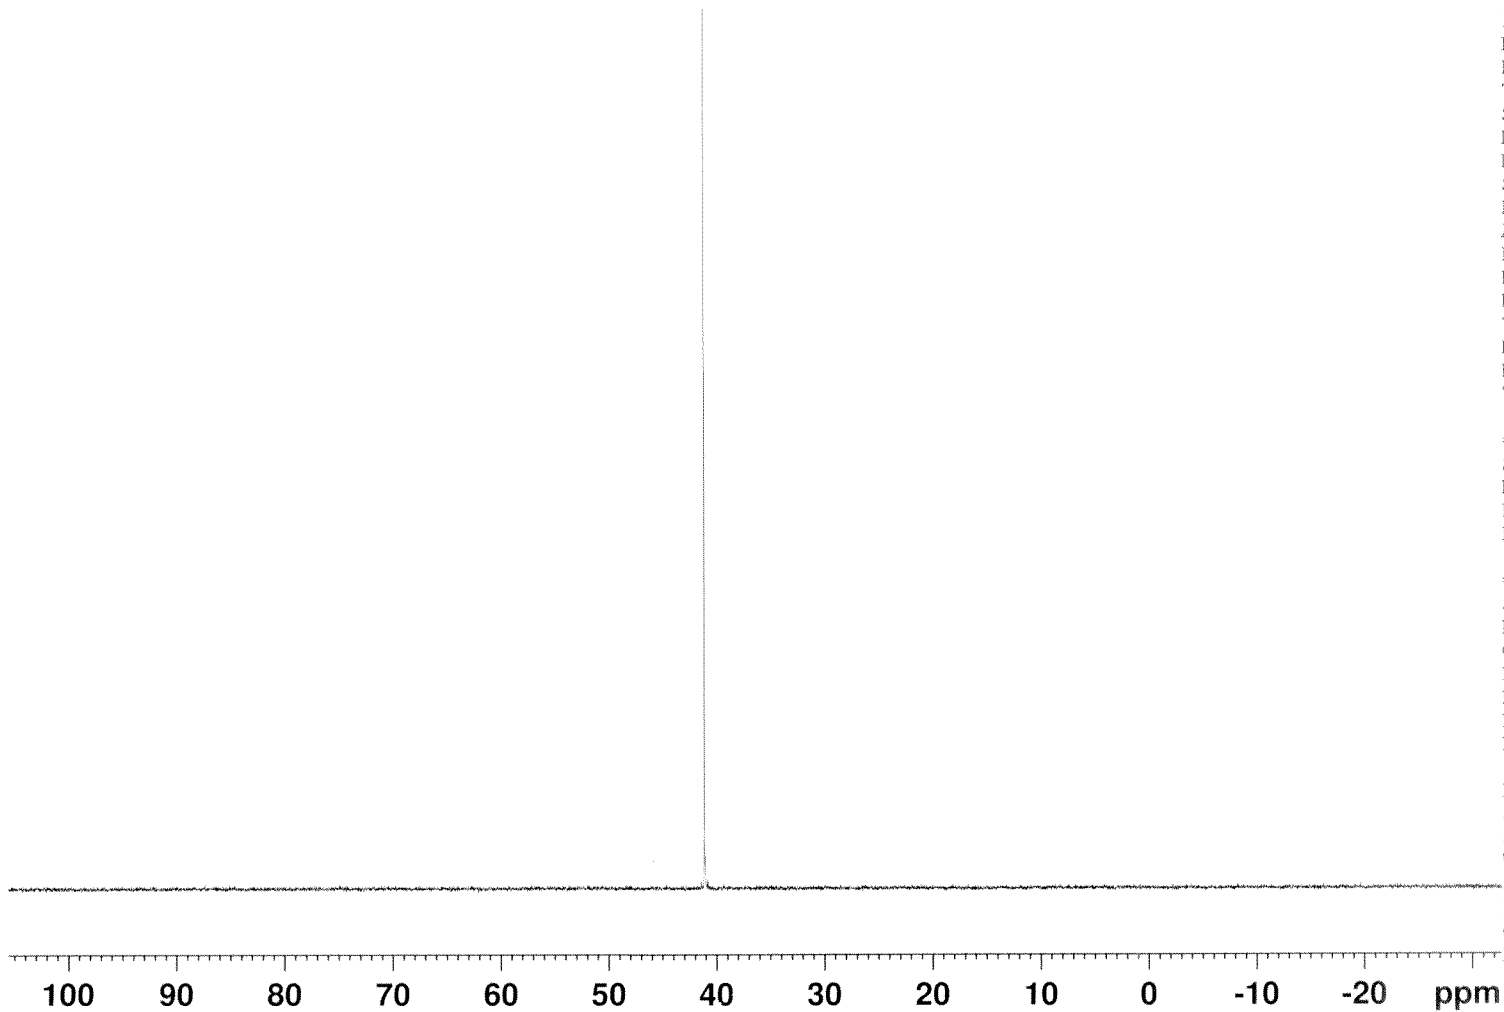

Current Data Parameters  
 NAME OB 1052  
 EXPNO 1  
 PROCNO 1

F2 - Acquisition Parameters  
 Date\_ 20130510  
 Time 10.02  
 INSTRUM spect  
 PROBHD 5 mm PABBO BB/  
 PULPROG zgpg30  
 TD 65536  
 SOLVENT CDC13  
 NS 16  
 DS 4  
 SWH 64102.563 Hz  
 FIDRES 0.978127 Hz  
 AQ 0.5111808 sec  
 RG 203.57  
 DW 7.800 usec  
 DE 6.50 usec  
 TE 297.0 K  
 D1 2.00000000 sec  
 D11 0.03000000 sec  
 TD0 1

==== CHANNEL f1 =====  
 SFO1 161.9674942 MHz  
 NUC1 31P  
 P1 14.25 usec  
 PLW1 15.00000000 W

==== CHANNEL f2 =====  
 SFO2 400.1316005 MHz  
 NUC2 1H  
 CPDPRG[2] waltz16  
 PCPD2 90.00 usec  
 PLW2 10.00000000 W  
 PLW12 0.31604999 W  
 PLW13 0.25600001 W

F2 - Processing parameters  
 SI 32768  
 SF 161.9755930 MHz  
 WDW EM  
 SSB 0  
 LB 1.00 Hz  
 GB 0  
 PC 1.40

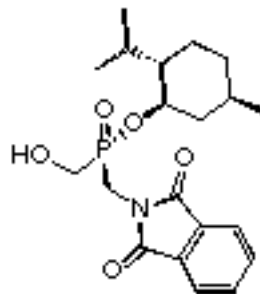

Compound (R<sub>p</sub>)-14  
<sup>31</sup>P/<sup>1</sup>H NMR coupled

Current Data Parameters  
NAME OB 1052  
EXPNO 2  
PROCNO 1

F2 - Acquisition Parameters

Date\_ 20130510  
Time 10.08  
INSTRUM spect  
PROBHD 5 mm PABBO BB/  
PULPROG zg30  
TD 65536  
SOLVENT CDC13  
NS 32  
DS 4  
SWH 64102.563 Hz  
FIDRES 0.978127 Hz  
AQ 0.5111808 sec  
RG 203.57  
DW 7.800 usec  
DE 6.50 usec  
TE 296.3 K  
D1 2.00000000 sec  
TD0 1

==== CHANNEL f1 =====

SFO1 161.9674942 MHz  
NUC1 31P  
P1 14.25 usec  
PLW1 15.00000000 W

F2 - Processing parameters

SI 32768  
SF 161.9755930 MHz  
WDW EM  
SSB 0  
LB 1.00 Hz  
GB 0  
PC 1.40

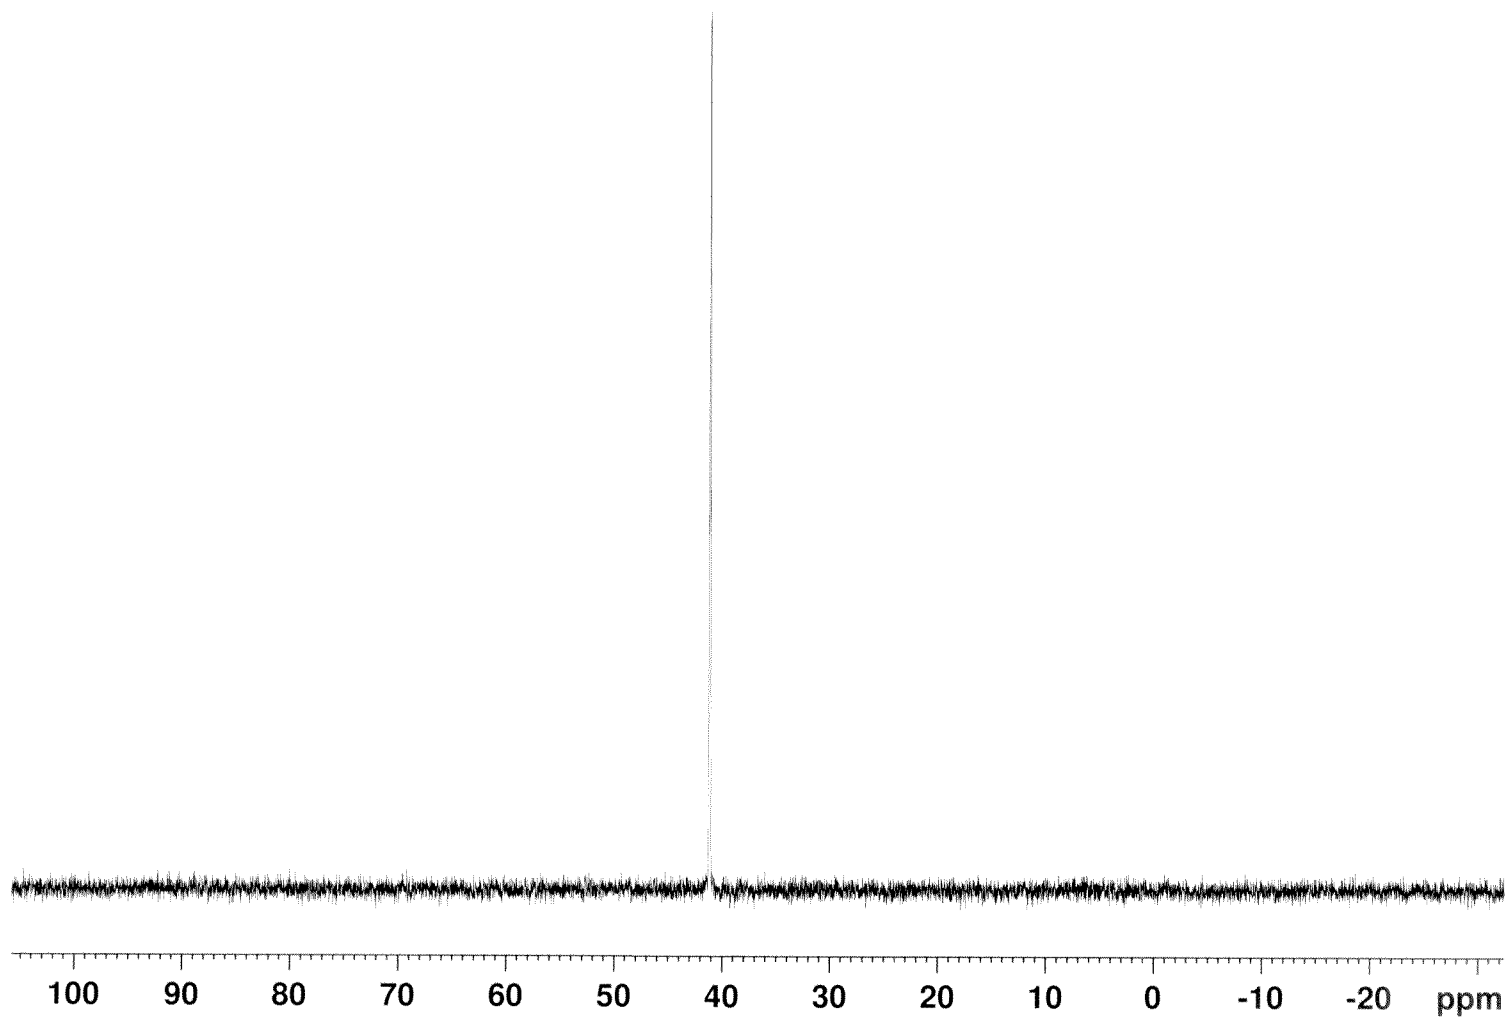



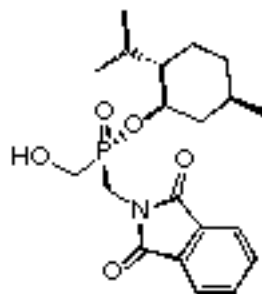

Compound (Rp)-14  
<sup>1</sup>H NMR

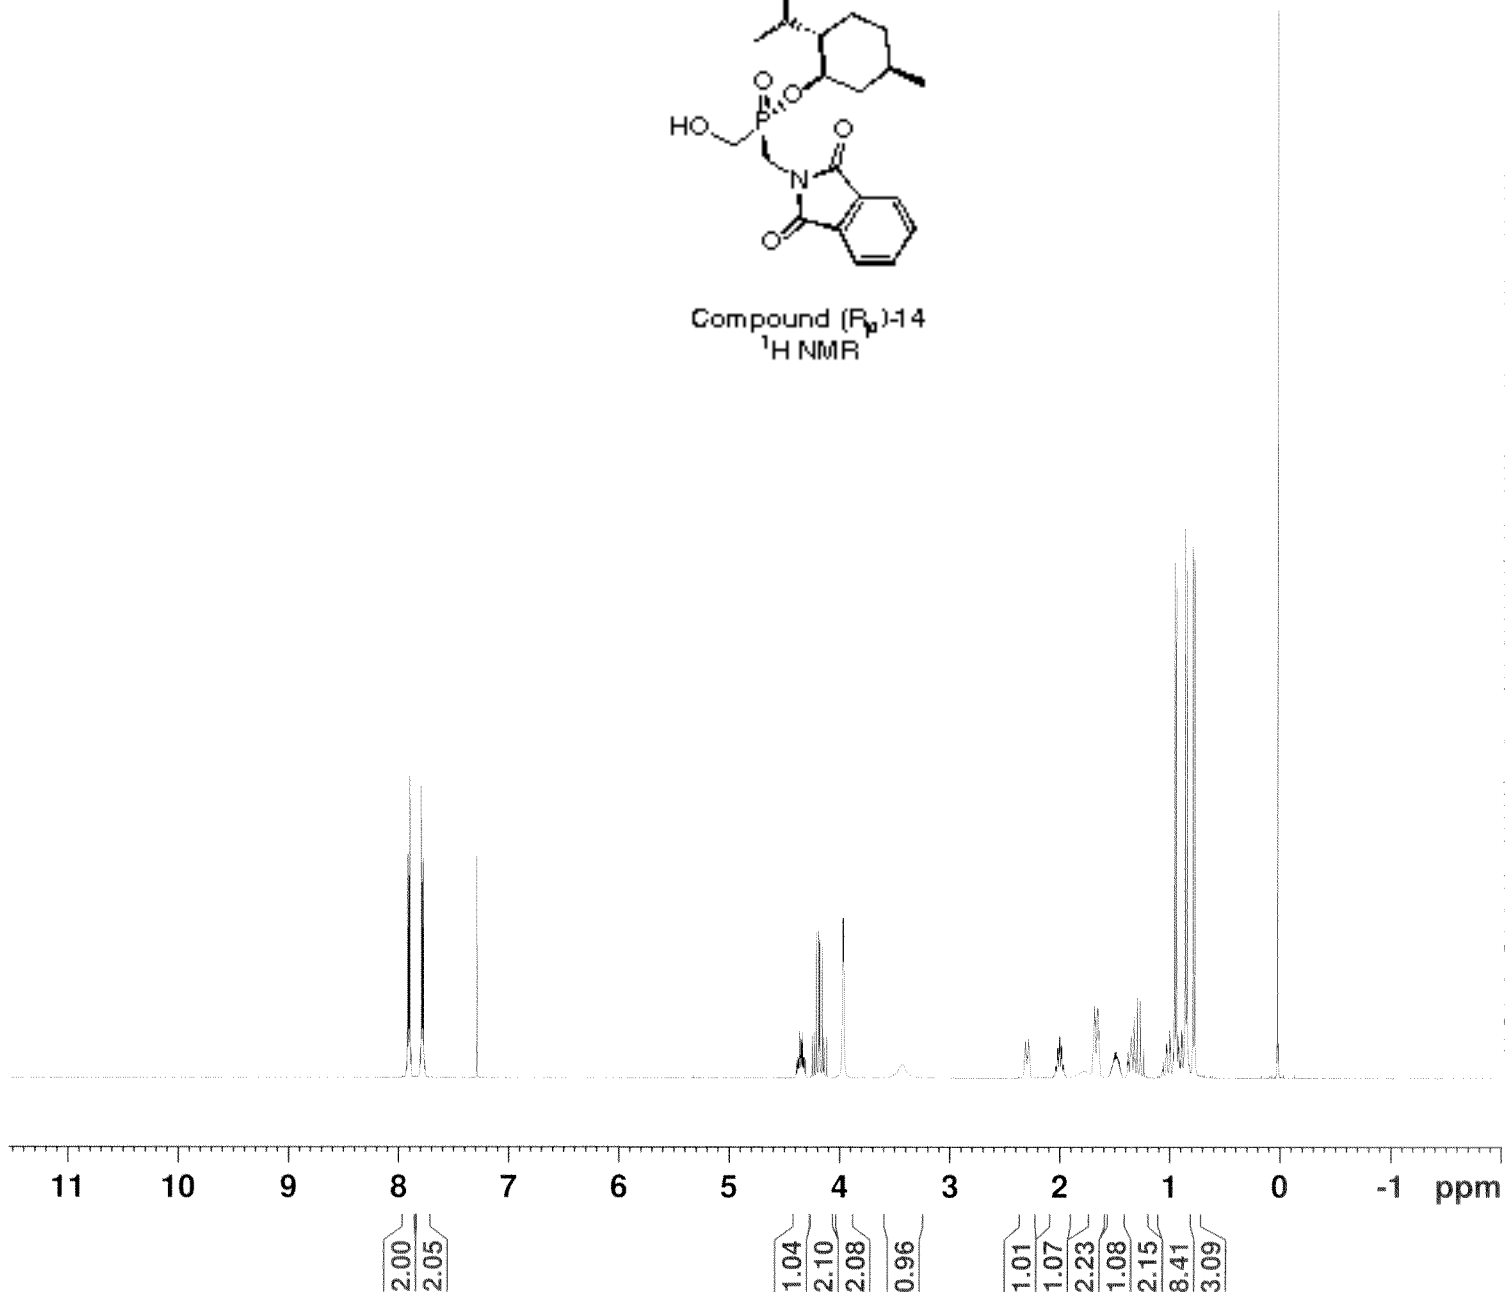

Current Data Parameters  
 NAME OB 1052  
 EXPNO 3  
 PROCNO 1

F2 - Acquisition Parameters  
 Date\_ 20130510  
 Time 10.15  
 INSTRUM spect  
 PROBHD 5 mm PABBO BB/  
 PULPROG zg30  
 TD 65536  
 SOLVENT CDCl3  
 NS 16  
 DS 2  
 SWH 8012.820 Hz  
 FIDRES 0.122266 Hz  
 AQ 4.0894465 sec  
 RG 128.8  
 DW 62.400 usec  
 DE 6.50 usec  
 TE 296.1 K  
 D1 1.00000000 sec  
 TD0 1

==== CHANNEL f1 =====  
 SFO1 400.1324710 MHz  
 NUC1 1H  
 P1 10.00 usec  
 PLW1 25.00300026 W

F2 - Processing parameters  
 SI 65536  
 SF 400.1300000 MHz  
 WDW EM  
 SSB 0  
 LB 0.30 Hz  
 GB 0  
 PC 1.00

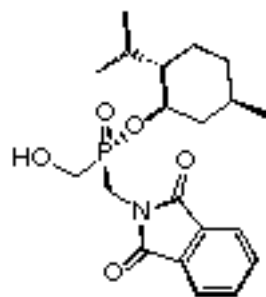

Compound (R<sub>2</sub>)-14  
<sup>13</sup>C NMR

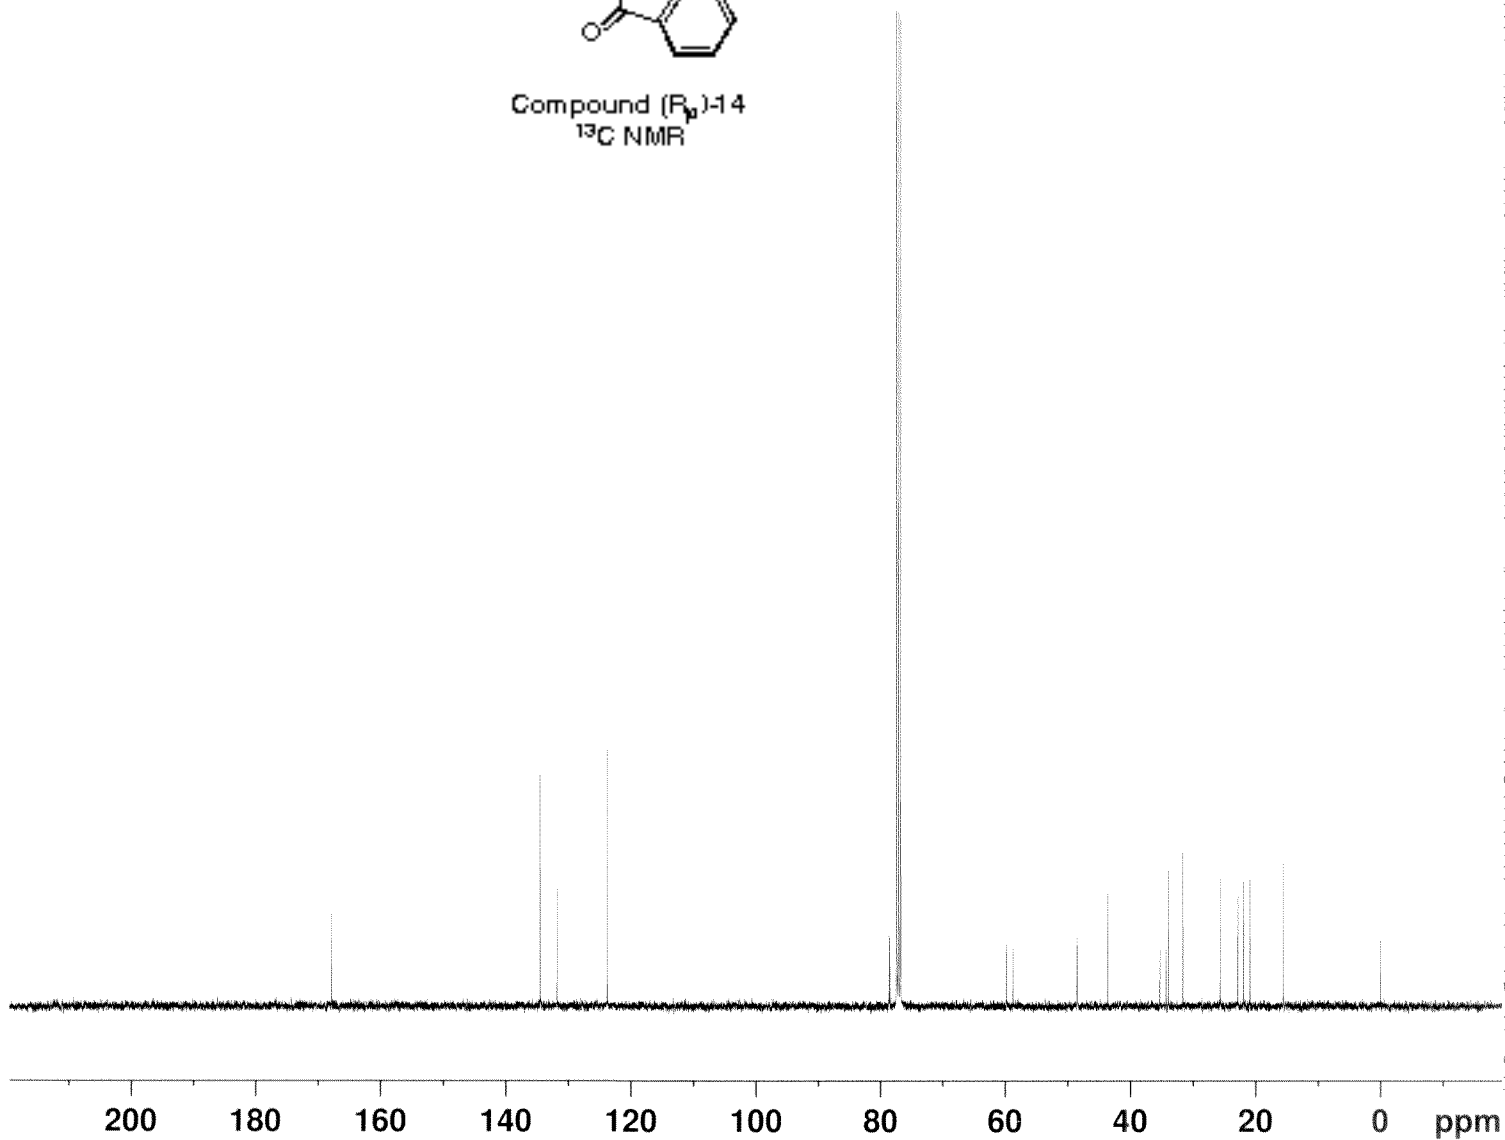

Current Data Parameters  
 NAME OB 1052  
 EXPNO 4  
 PROCNO 1

F2 - Acquisition Parameters  
 Date\_ 20130510  
 Time 10.58  
 INSTRUM spect  
 PROBHD 5 mm PABBO BB/  
 PULPROG zgpg30  
 TD 65536  
 SOLVENT CDC13  
 NS 639  
 DS 4  
 SWH 24038.461 Hz  
 FIDRES 0.366798 Hz  
 AQ 1.3631488 sec  
 RG 203.57  
 DW 20.800 usec  
 DE 6.50 usec  
 TE 297.6 K  
 D1 2.00000000 sec  
 D11 0.03000000 sec  
 TD0 1

==== CHANNEL f1 =====  
 SFO1 100.6228293 MHz  
 NUC1 13C  
 P1 10.00 usec  
 PLW1 45.00000000 W

==== CHANNEL f2 =====  
 SFO2 400.1316005 MHz  
 NUC2 1H  
 CPDPRG[2] waltz16  
 PCPD2 90.00 usec  
 PLW2 10.00000000 W  
 PLW12 0.31604999 W  
 PLW13 0.25600001 W

F2 - Processing parameters  
 SI 32768  
 SF 100.6127690 MHz  
 WDW EM  
 SSB 0  
 LB 1.00 Hz  
 GB 0  
 PC 1.40

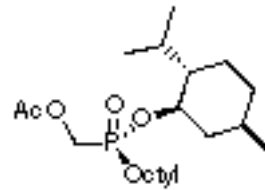

Compound (Rp)-15  
<sup>31</sup>P/<sup>1</sup>H NMR decoupled

Current Data Parameters  
 NAME OB 1172  
 EXPNO 1  
 PROCNO 1

F2 - Acquisition Parameters  
 Date\_ 20130717  
 Time 20.05  
 INSTRUM spect  
 PROBHD 5 mm PABBO BB/  
 PULPROG zgpg30  
 TD 65536  
 SOLVENT CDC13  
 NS 16  
 DS 4  
 SWH 64102.563 Hz  
 FIDRES 0.978127 Hz  
 AQ 0.5111808 sec  
 RG 203.57  
 DW 7.800 usec  
 DE 6.50 usec  
 TE 294.6 K  
 D1 2.00000000 sec  
 D11 0.03000000 sec  
 TD0 1

==== CHANNEL f1 =====  
 SFO1 161.9674942 MHz  
 NUC1 31P  
 P1 14.25 usec  
 PLW1 15.00000000 W

==== CHANNEL f2 =====  
 SFO2 400.1316005 MHz  
 NUC2 1H  
 CPDPRG[2] waltz16  
 PCPD2 90.00 usec  
 PLW2 10.00000000 W  
 PLW12 0.31604999 W  
 PLW13 0.25600001 W

F2 - Processing parameters  
 SI 32768  
 SF 161.9755930 MHz  
 WDW EM  
 SSB 0  
 LB 1.00 Hz  
 GB 0  
 PC 1.40

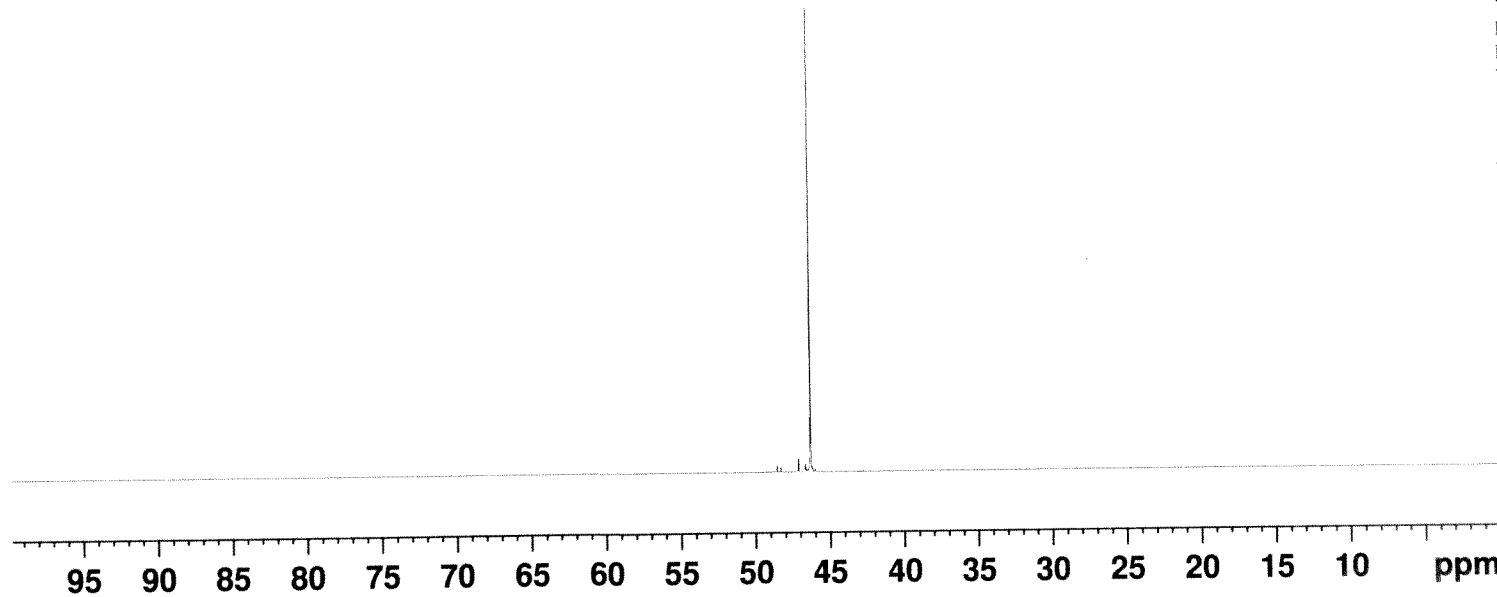

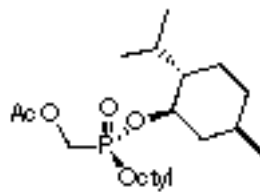

Compound (Rp)-15  
<sup>31</sup>P/<sup>1</sup>H NMR coupled

Current Data Parameters  
 NAME OB 1172  
 EXPNO 2  
 PROCNO 1

F2 - Acquisition Parameters  
 Date\_ 20130717  
 Time 20.11  
 INSTRUM spect  
 PROBHD 5 mm PABBO BB/  
 PULPROG zg30  
 TD 65536  
 SOLVENT CDC13  
 NS 32  
 DS 4  
 SWH 64102.563 Hz  
 FIDRES 0.978127 Hz  
 AQ 0.5111808 sec  
 RG 203.57  
 DW 7.800 usec  
 DE 6.50 usec  
 TE 293.9 K  
 D1 2.00000000 sec  
 TD0 1

==== CHANNEL f1 =====  
 SFO1 161.9674942 MHz  
 NUC1 31P  
 P1 14.25 usec  
 PLW1 15.00000000 W

F2 - Processing parameters  
 SI 32768  
 SF 161.9755930 MHz  
 WDW EM  
 SSB 0  
 LB 1.00 Hz  
 GB 0  
 PC 1.40

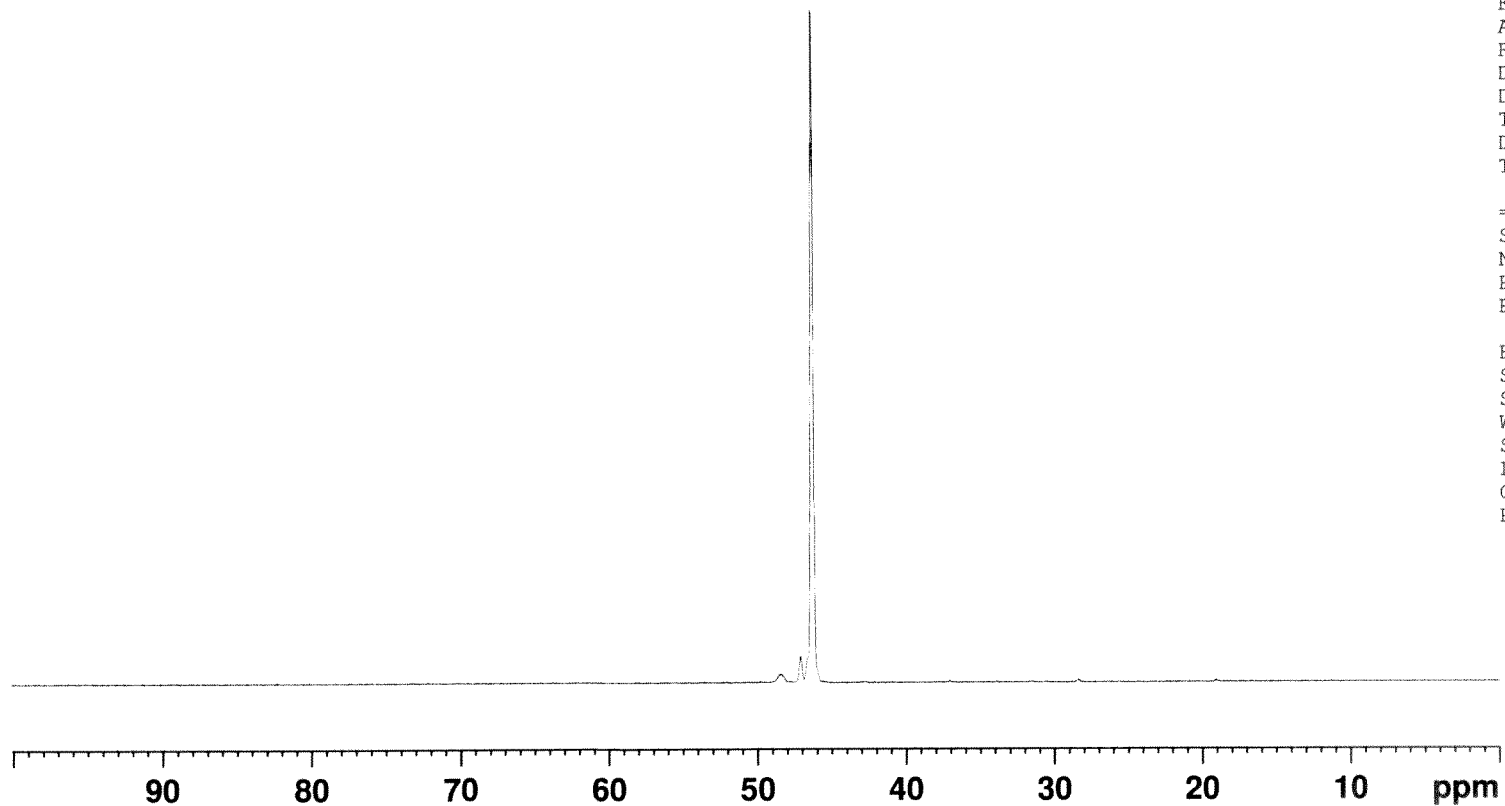

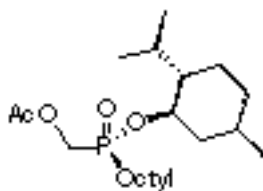

Compound (R<sub>p</sub>)-15  
<sup>1</sup>H NMR

Current Data Parameters  
 NAME OB 1172  
 EXPNO 3  
 PROCNO 1

F2 - Acquisition Parameters  
 Date\_ 20130717  
 Time 20.14  
 INSTRUM spect  
 PROBHD 5 mm PABBO BB/  
 PULPROG zg30  
 TD 65536  
 SOLVENT CDC13  
 NS 16  
 DS 2  
 SWH 8012.820 Hz  
 FIDRES 0.122266 Hz  
 AQ 4.0894465 sec  
 RG 6.28  
 DW 62.400 usec  
 DE 6.50 usec  
 TE 293.9 K  
 D1 1.00000000 sec  
 TD0 1

==== CHANNEL f1 =====  
 SFO1 400.1324710 MHz  
 NUC1 1H  
 P1 10.00 usec  
 PLW1 25.00300026 W

F2 - Processing parameters  
 SI 65536  
 SF 400.1300000 MHz  
 WDW EM  
 SSB 0  
 LB 0.30 Hz  
 GB 0  
 PC 1.00

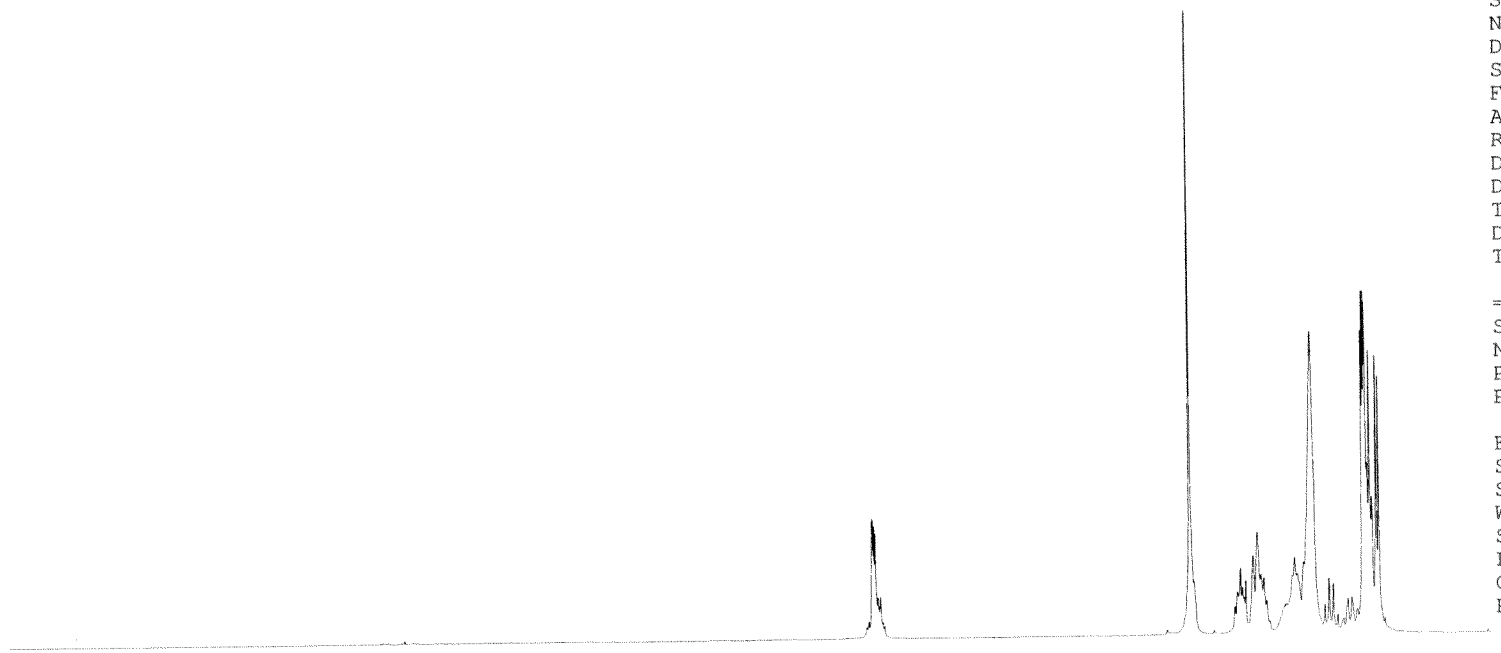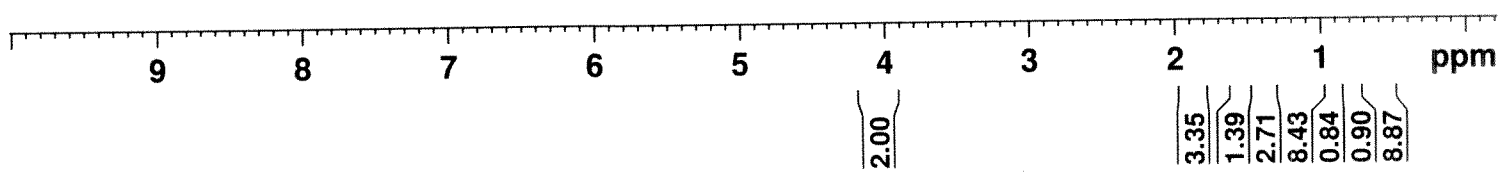

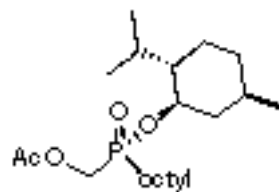

Compound (Rp)-15  
<sup>13</sup>C NMR

Current Data Parameters  
 NAME OB 1172  
 EXPNO 4  
 PROCNO 1

F2 - Acquisition Parameters  
 Date\_ 20130717  
 Time 20.59  
 INSTRUM spect  
 PROBHD 5 mm PABBO BE/  
 PULPROG zgpg30  
 TD 65536  
 SOLVENT CDCl3  
 NS 750  
 DS 4  
 SWH 24038.461 Hz  
 FIDRES 0.366798 Hz  
 AQ 1.3631488 sec  
 RG 203.57  
 DW 20.800 usec  
 DE 6.50 usec  
 TE 294.7 K  
 D1 2.00000000 sec  
 D11 0.03000000 sec  
 TD0 1

==== CHANNEL f1 =====  
 SFO1 100.6228293 MHz  
 NUC1 13C  
 P1 10.00 usec  
 PLW1 45.00000000 W

==== CHANNEL f2 =====  
 SFO2 400.1316005 MHz  
 NUC2 1H  
 CPDPRG[2] waltz16  
 PCPD2 90.00 usec  
 PLW2 10.00000000 W  
 PLW12 0.31604999 W  
 PLW13 0.25600001 W

F2 - Processing parameters  
 SI 32768  
 SF 100.6127690 MHz  
 WDW EM  
 SSB 0  
 LB 1.00 Hz  
 GB 0  
 PC 1.40

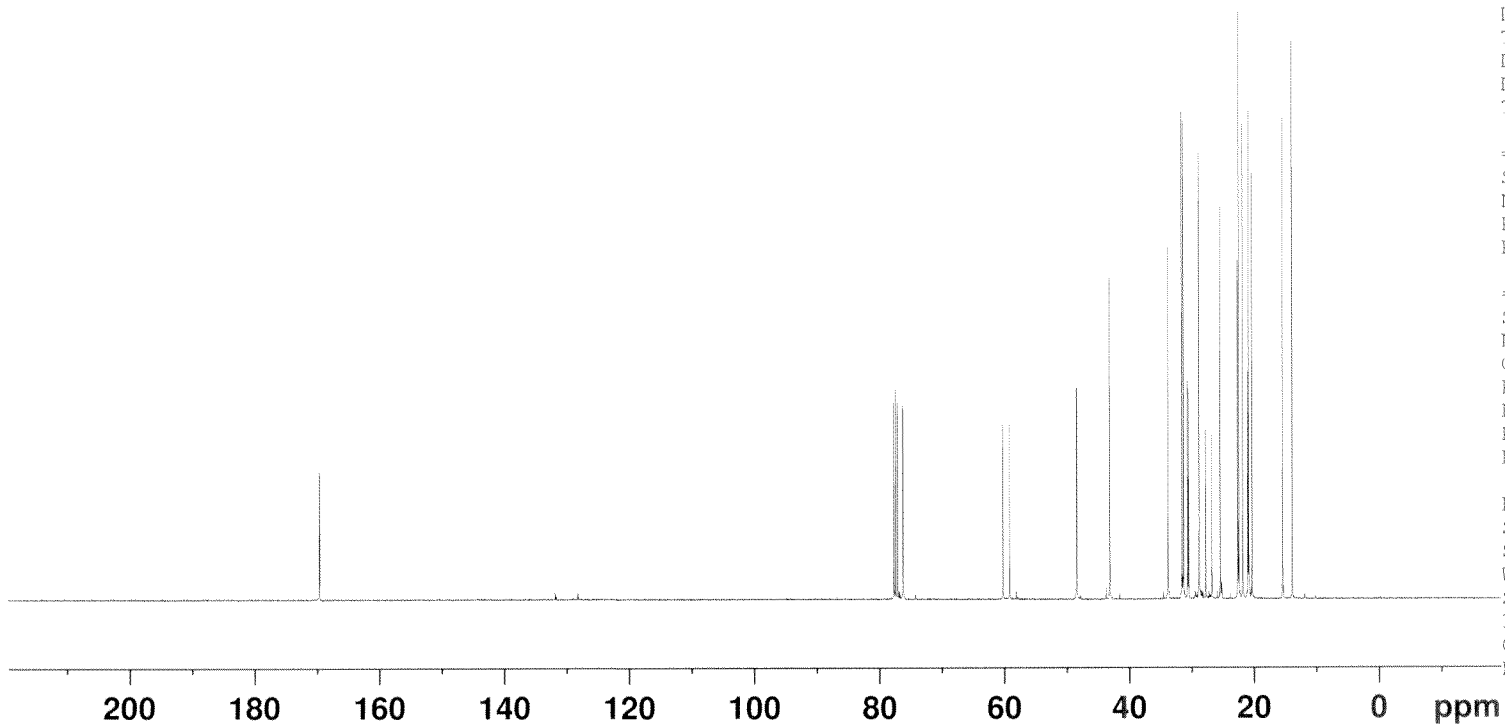

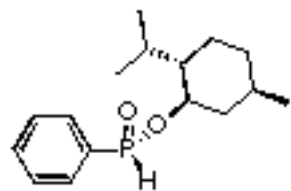

Compound (Rp)-1  
<sup>31</sup>P/<sup>1</sup>H NMR decoupled

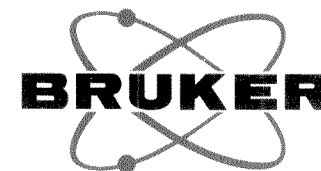

Current Data Parameters  
 NAME OB 2018  
 EXPNO 1  
 PROCNO 1

F2 - Acquisition Parameters  
 Date\_ 20150429  
 Time 17.03  
 INSTRUM spect  
 PROBHD 5 mm PABBO BB/  
 PULPROG zgpg30  
 TD 65536  
 SOLVENT CDCl3  
 NS 16  
 DS 4  
 SWH 64102.563 Hz  
 FIDRES 0.978127 Hz  
 AQ 0.5111808 sec  
 RG 203.57  
 DW 7.800 usec  
 DE 6.50 usec  
 TE 295.7 K  
 D1 2.00000000 sec  
 D11 0.03000000 sec  
 TDO 1

==== CHANNEL f1 =====  
 SFO1 161.9674942 MHz  
 NUC1 31P  
 P1 14.25 usec  
 PLW1 15.00000000 W

==== CHANNEL f2 =====  
 SFO2 400.1316005 MHz  
 NUC2 1H  
 CPDPRG[2] waltz16  
 PCPD2 90.00 usec  
 PLW2 10.00000000 W  
 PLW12 0.31604999 W  
 PLW13 0.25600001 W

F2 - Processing parameters  
 SI 32768  
 SF 161.9755930 MHz  
 WDW EM  
 SSB 0  
 LB 1.00 Hz  
 GB 0  
 PC 1.40

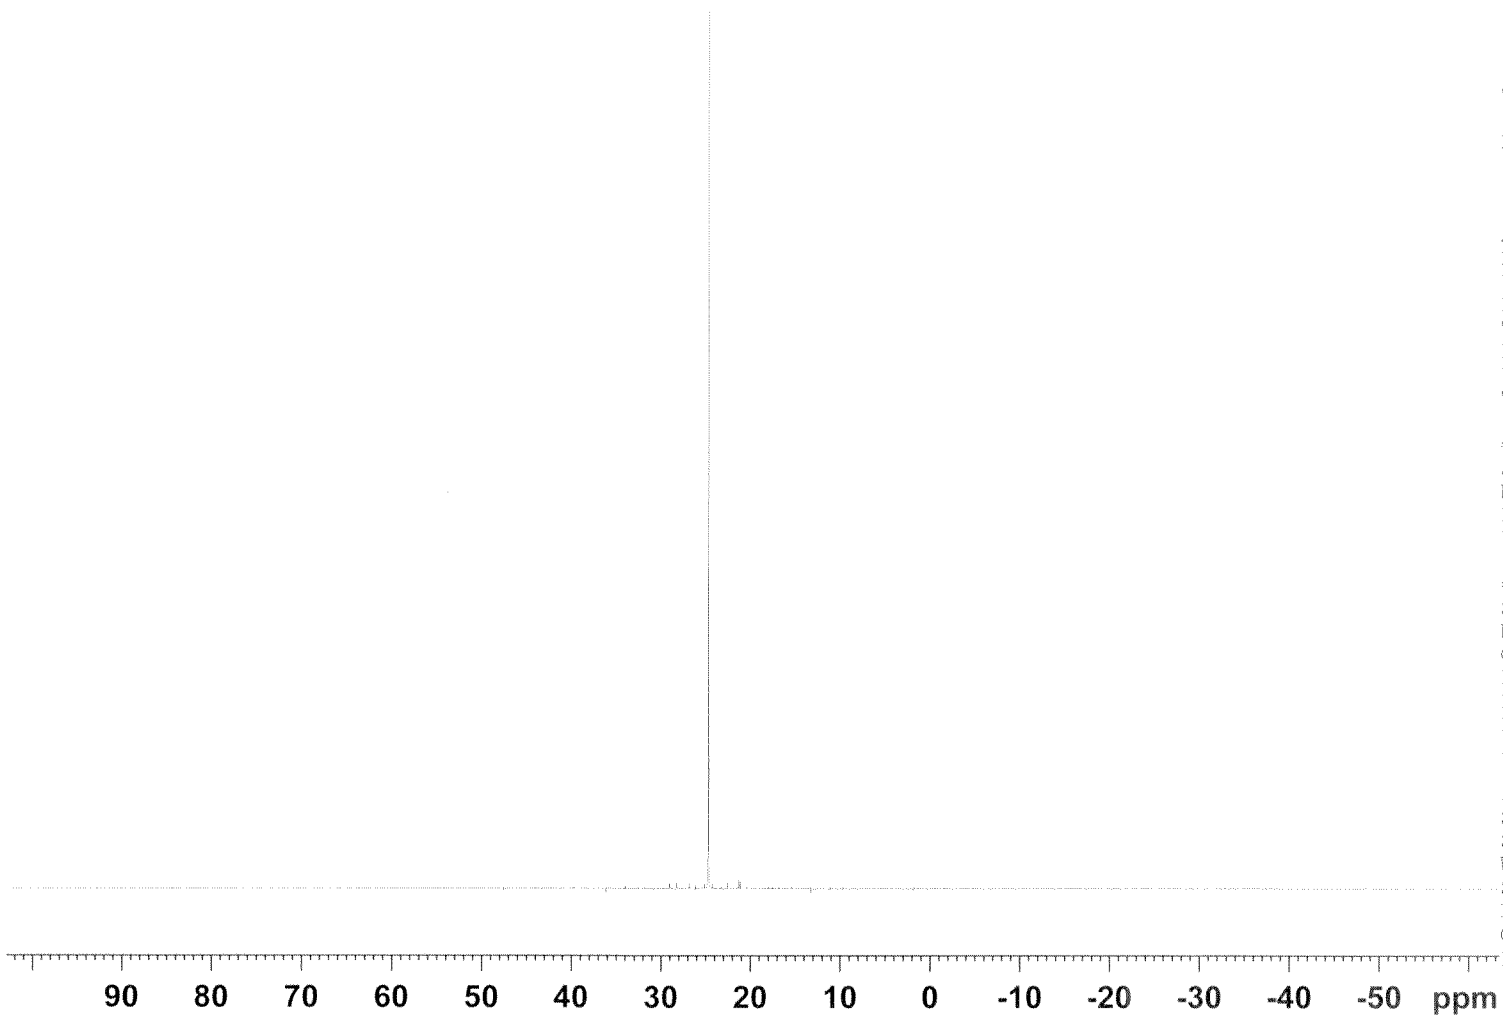

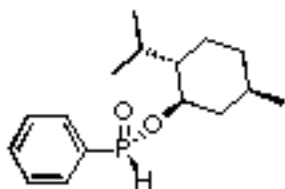

Compound (R<sub>p</sub>)-1  
<sup>31</sup>P/<sup>1</sup>H NMR coupled

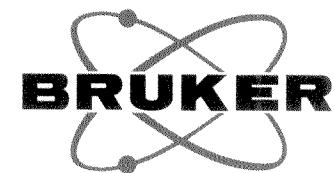

Current Data Parameters  
NAME OB 2018  
EXPNO 2  
PROCNO 1

F2 - Acquisition Parameters

Date\_ 20150429  
Time\_ 17.05  
INSTRUM spect  
PROBHD 5 mm PABBO BE/  
PULPROG zg30  
TD 65536  
SOLVENT CDC13  
NS 32  
DS 4  
SWH 64102.563 Hz  
FIDRES 0.978127 Hz  
AQ 0.5111808 sec  
RG 203.57  
DW 7.800 usec  
DE 6.50 usec  
TE 295.4 K  
D1 2.00000000 sec  
TDO 1

==== CHANNEL f1 =====  
SFO1 161.9674942 MHz  
NUC1 31P  
P1 14.25 usec  
PLW1 15.00000000 W

F2 - Processing parameters

SI 32768  
SF 161.9755930 MHz  
WDW EM  
SSB 0  
LB 1.00 Hz  
GB 0  
PC 1.40

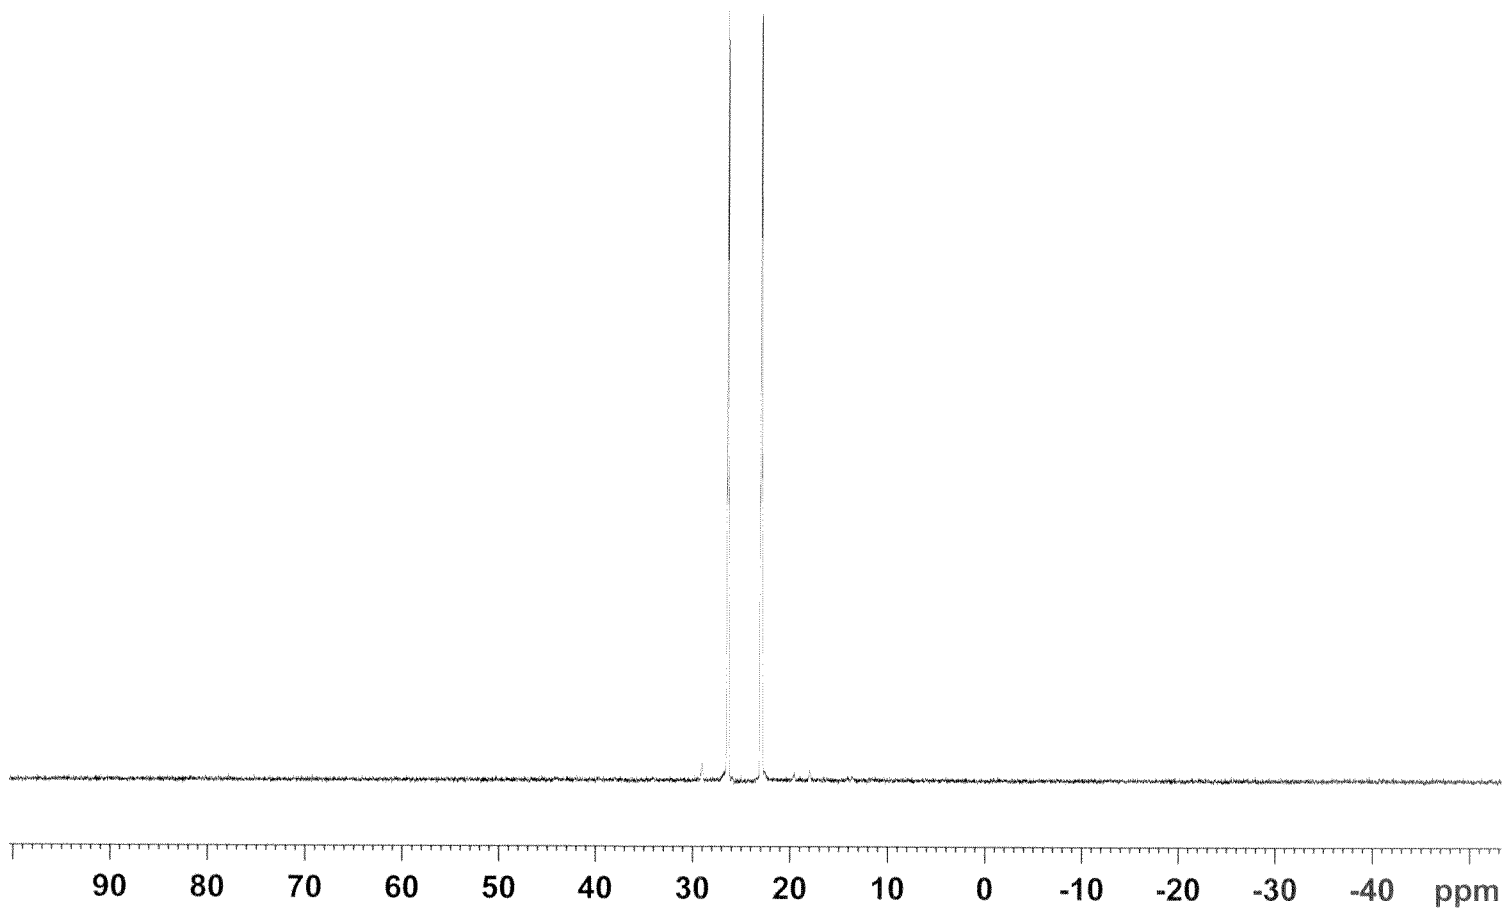



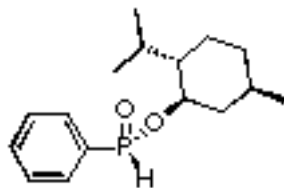

Compound (R<sub>p</sub>)-1  
<sup>1</sup>H NMR

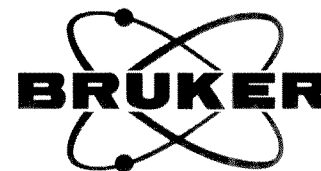

Current Data Parameters  
 NAME OB 2018  
 EXPNO 3  
 PROCNO 1

F2 - Acquisition Parameters  
 Date\_ 20150429  
 Time\_ 17.06  
 INSTRUM spect  
 PROBHD 5 mm PABBO BB/  
 PULPROG zg30  
 TD 65536  
 SOLVENT CDC13  
 NS 10  
 DS 2  
 SWH 8012.820 Hz  
 FIDRES 0.122266 Hz  
 AQ 4.0894465 sec  
 RG 32.38  
 DW 62.400 usec  
 DE 6.50 usec  
 TE 295.1 K  
 D1 1.00000000 sec  
 TD0 1

==== CHANNEL f1 =====  
 SF01 400.1324710 MHz  
 NUC1 1H  
 P1 10.00 usec  
 PLW1 25.00300026 W

F2 - Processing parameters  
 SI 65536  
 SF 400.1300000 MHz  
 WDW EM  
 SSB 0  
 LB 0.60 Hz  
 GB 0  
 PC 1.00

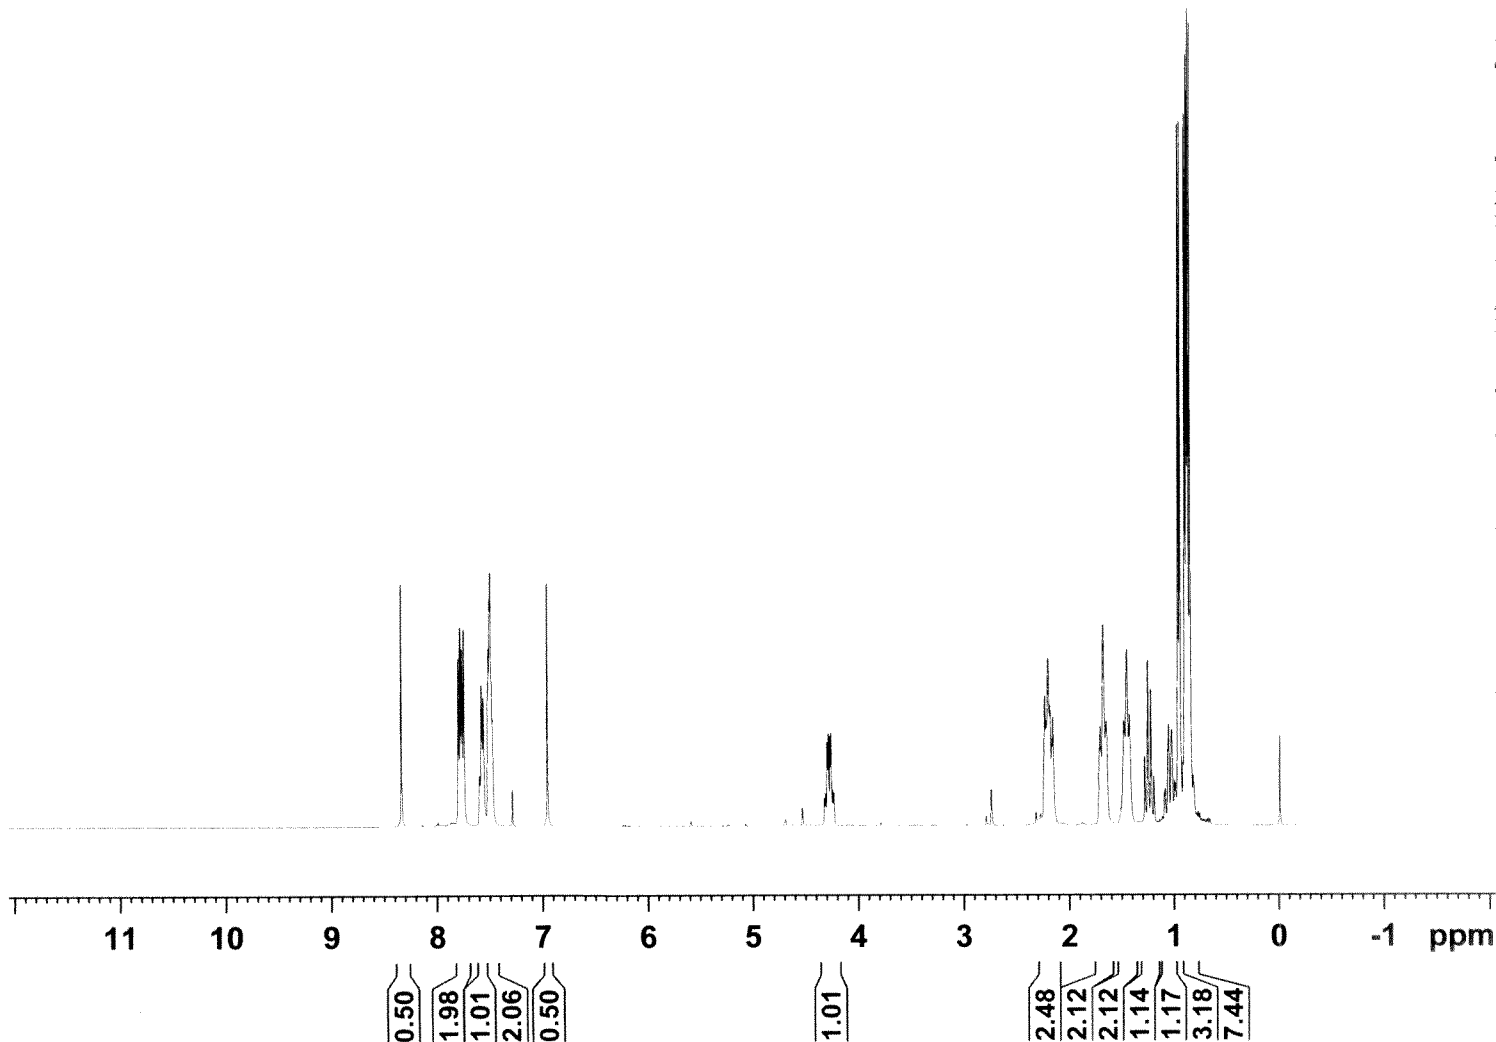

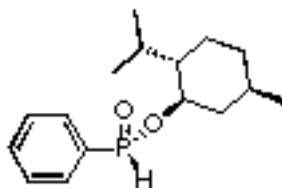

Compound (R<sub>p</sub>)-1  
<sup>13</sup>C NMR

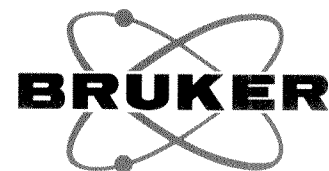

Current Data Parameters  
 NAME OB 2018  
 EXPNO 4  
 PROCNO 1

F2 - Acquisition Parameters  
 Date\_ 20150429  
 Time\_ 18.03  
 INSTRUM spect  
 PROBHD 5 mm PABBO BB/  
 PULPROG zgpg30  
 TD 65536  
 SOLVENT CDCl3  
 NS 942  
 DS 4  
 SWH 24038.461 Hz  
 FIDRES 0.366798 Hz  
 AQ 1.3631488 sec  
 RG 203.57  
 DW 20.800 usec  
 DE 6.50 usec  
 TE 295.2 K  
 D1 2.00000000 sec  
 D11 0.03000000 sec  
 TD0 1

==== CHANNEL f1 =====  
 SFO1 100.6228293 MHz  
 NUC1 13C  
 P1 10.00 usec  
 PLW1 45.00000000 W

==== CHANNEL f2 =====  
 SFO2 400.1316005 MHz  
 NUC2 1H  
 CPDPRG[2] waltz16  
 PCPD2 90.00 usec  
 PLW2 10.00000000 W  
 PLW12 0.31604999 W  
 PLW13 0.25600001 W

F2 - Processing parameters  
 SI 32768  
 SF 100.6127685 MHz  
 WDW EM  
 SSB 0  
 LB 1.00 Hz  
 GB 0  
 PC 1.40

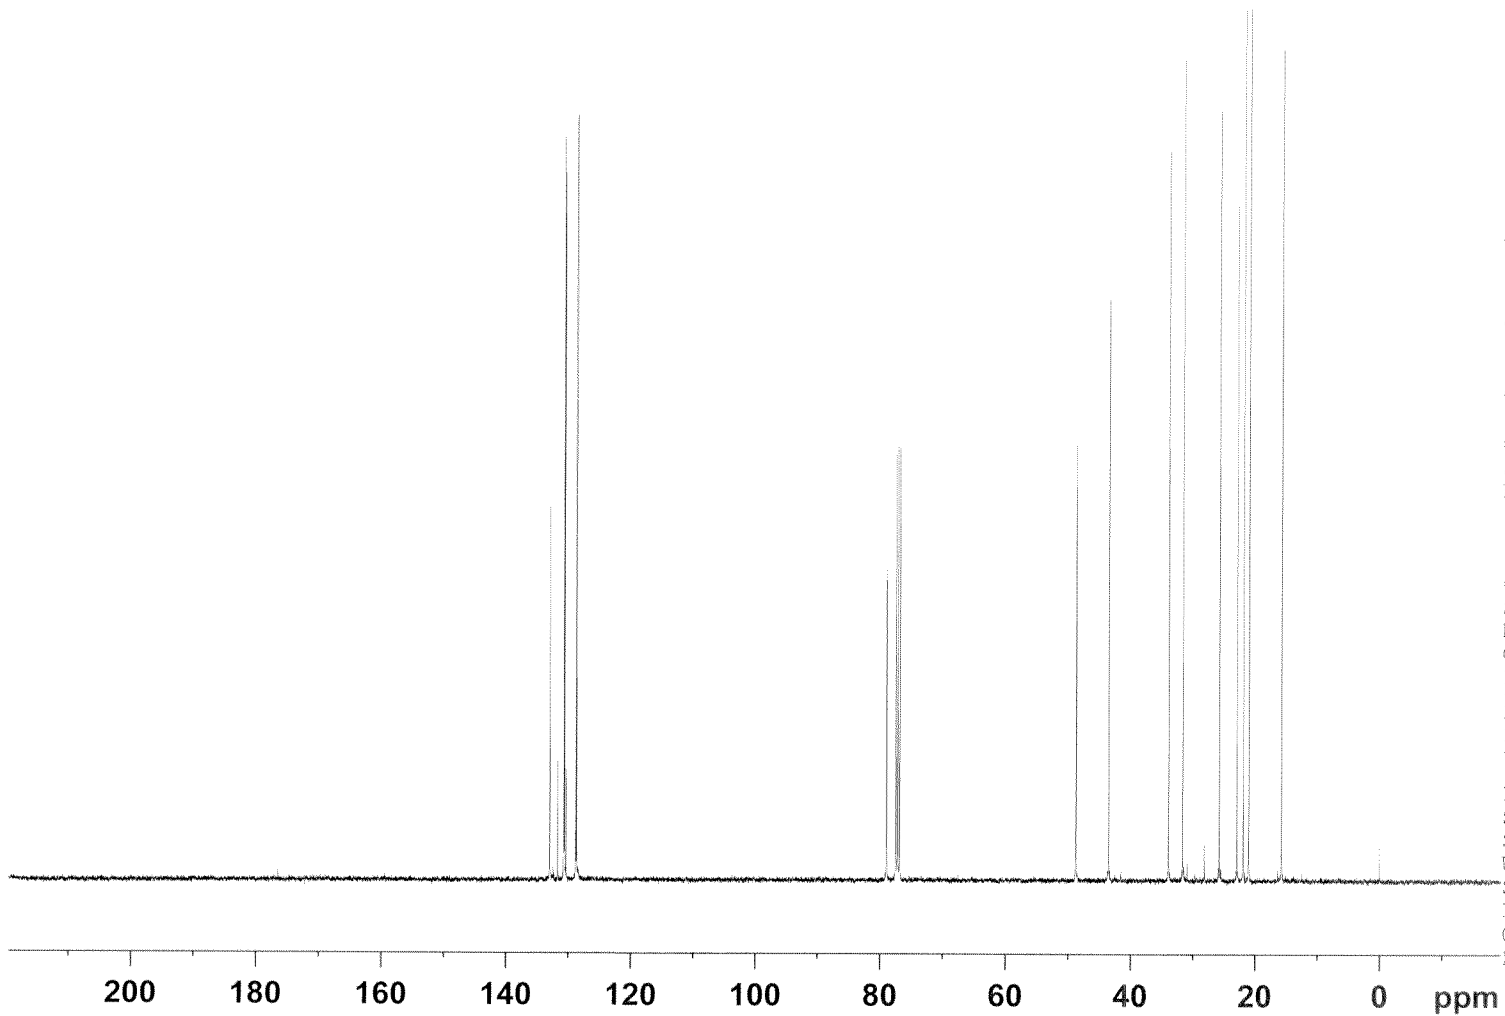

08085

~~exp1~~ s2pu1

| SAMPLE      |             | SPECIAL    |          |
|-------------|-------------|------------|----------|
| date        | Oct 24 2011 | temp       | not used |
| solvent     | CDC13       | gain       | not used |
| file        | exp         | spin       | 20       |
| ACQUISITION |             |            |          |
| sw          | 26738.0     | hst        | 0.008    |
| at          | 1.598       | pw90       | 18.300   |
| np          | 85476       | alfa       | 20.000   |
| fb          | 14800       | FLAGS      |          |
| bs          | 16          | il         | n        |
| ss          | 4           | in         | n        |
| d1          | 1.000       | dp         | y        |
| nt          | 64          | hs         | nn       |
| ct          | 32          | PROCESSING |          |
| tn          | P31         | ib         | 1.00     |
| TRANSMITTER |             | fr         | not used |
| sfrq        | 121.471     | DISPLAY    |          |
| tof         | 10588.6     | sp         | -0.2     |
| tpwr        | 55          | wp         | 10010.0  |
| pw          | 7.117       | rfl        | 2437.5   |
| DECOUPLER   |             | rfp        | 0        |
| dn          | H1          | fp         | -140.4   |
| dof         | 0           | lp         | -285.8   |
| dm          | yyy         | PLOT       |          |
| dnam        | w           | vc         | 250      |
| dpwr        | 35          | sc         | 0        |
| dmf         | 6700        | vs         | 5        |
|             |             | th         | 4        |
|             |             | ai         | no ph    |

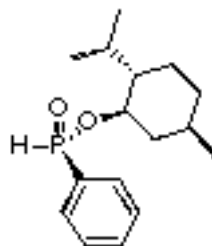

Compound (S<sub>p</sub>)-1  
31P/H NMR decoupled

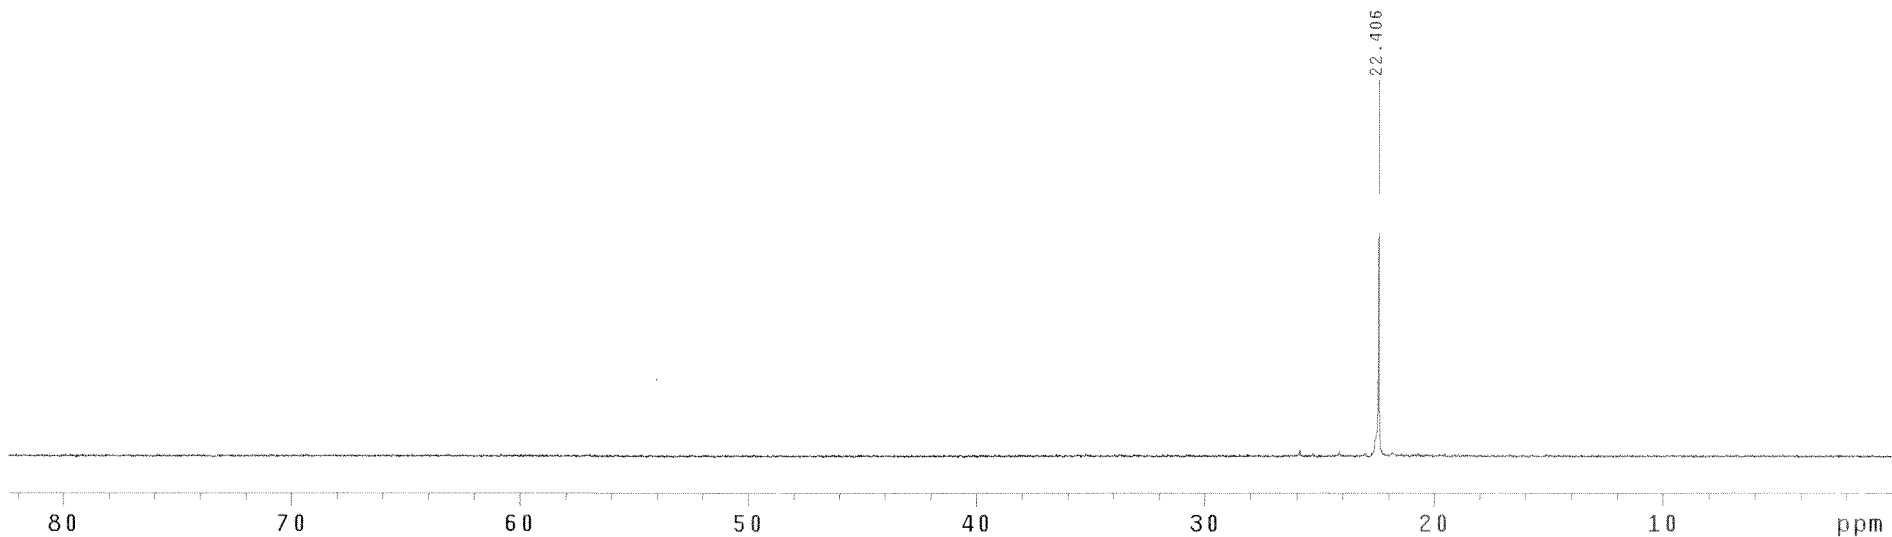

08085

~~exp1 s2put~~

| SAMPLE      |             | SPECIAL    |          |
|-------------|-------------|------------|----------|
| date        | Oct 24 2011 | temp       | not used |
| solvent     | CDCl3       | gain       | not used |
| file        | exp         | spin       | 20       |
| ACQUISITION |             | SPECIAL    |          |
| sw          | 26738.0     | hst        | 0.008    |
| at          | 1.598       | pw90       | 18.300   |
| np          | 85476       | alfa       | 20.000   |
| fb          | 14800       | FLAGS      |          |
| bs          | 16          | il         | n        |
| ss          | 4           | in         | n        |
| d1          | 1.000       | dp         | y        |
| nt          | 64          | hs         | nn       |
| ct          | 32          | PROCESSING |          |
| TRANSMITTER |             | lb         | 1.00     |
| tn          | P31         | fn         | not used |
| DISPLAY     |             | sp         | -0.2     |
| sfrq        | 121.471     | wp         | 10010.0  |
| tof         | 10598.6     | rfl        | 2437.5   |
| tpwr        | 55          | rfp        | 0        |
| pw          | 7.117       | rp         | -135.0   |
| DECOUPLER   |             | lp         | -326.4   |
| dn          | H1          | PLOT       |          |
| dof         | 0           | wc         | 250      |
| dm          | ywn         | sc         | 0        |
| dmm         | w           | vs         | 71       |
| dpwr        | 35          | th         | 12       |
| dmf         | 6700        | ai         | no       |
|             |             | ph         |          |

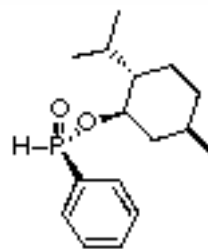

Compound (Sp)-1  
<sup>31</sup>P/<sup>1</sup>H NMR coupled

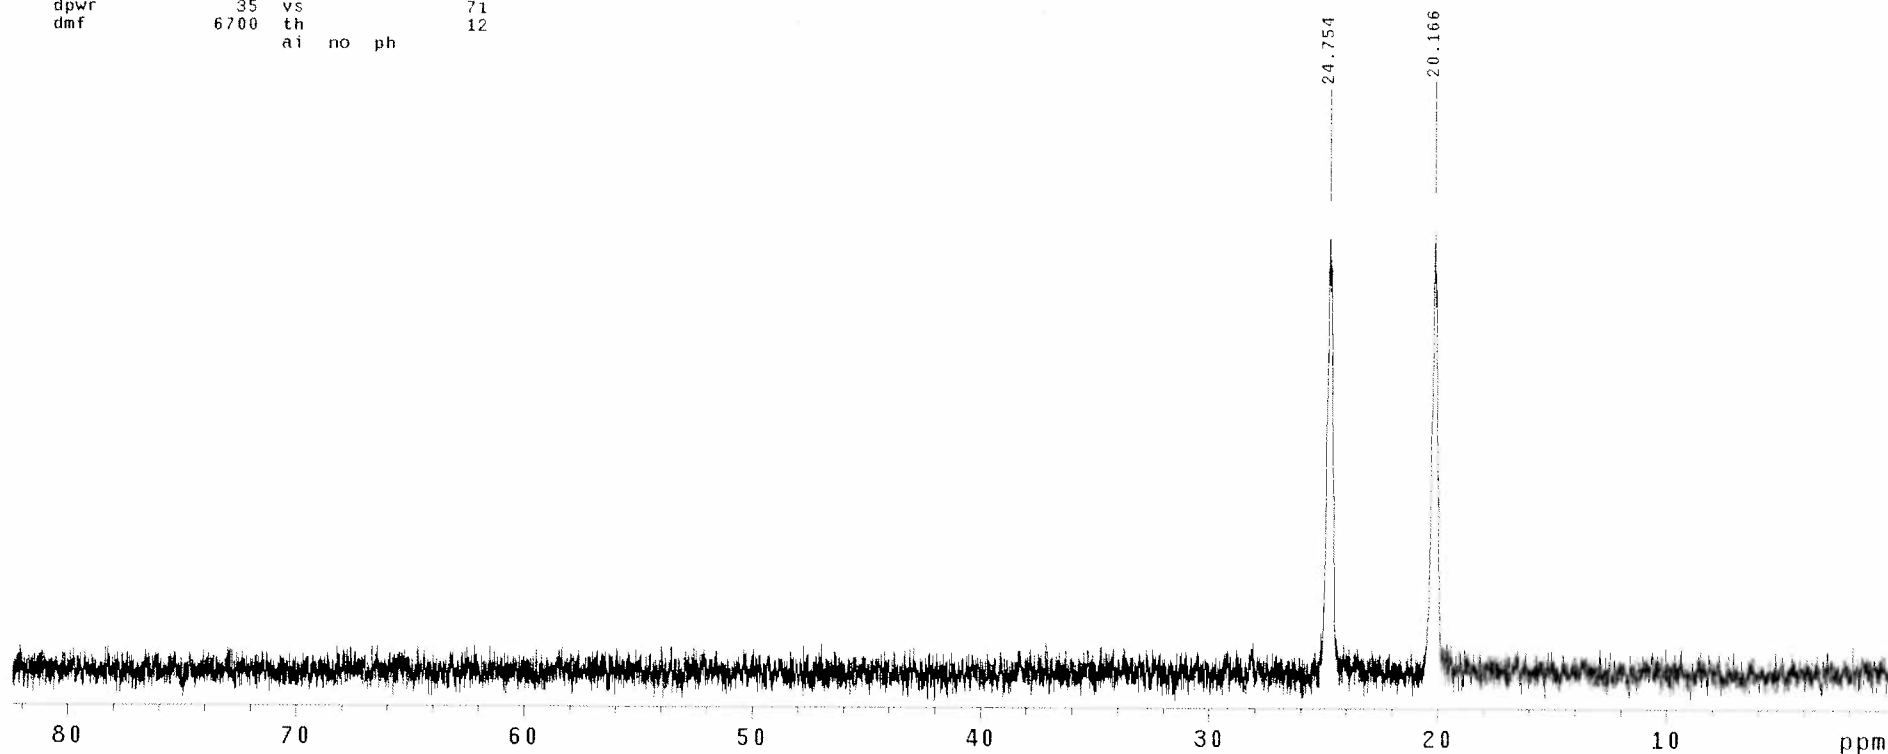

OB 085

exp1 s2pul

|             |             |            |          |
|-------------|-------------|------------|----------|
| SAMPLE      |             | SPECIAL    |          |
| date        | Oct 24 2011 | temp       | not used |
| solvent     | CDC13       | gain       | not used |
| file        | exp         | spin       | 20       |
| ACQUISITION |             | hst        | 0.008    |
| sw          | 4803.1      | pw90       | 17.200   |
| at          | 1.994       | alfa       | 20.000   |
| np          | 19158       | FLAGS      |          |
| fb          | not used    | il         | n        |
| bs          | 16          | in         | n        |
| ss          | 4           | dp         | y        |
| d1          | 1.000       | hs         | nn       |
| nt          | 16          | PROCESSING |          |
| ct          | 16          | fn         | not used |
| TRANSMITTER |             | DISPLAY    |          |
| tn          | H1          | sp         | -598.0   |
| sfrq        | 300.047     | wp         | 4802.8   |
| tof         | 277.8       | rfl        | 598.3    |
| tpwr        | 55          | rfl        | 0        |
| pw          | 8.600       | rp         | -117.1   |
| DECOUPLER   |             | lp         | -79.0    |
| dn          | C13         | PLOT       |          |
| dof         | 0           | wc         | 250      |
| dm          | nnn         | sc         | 0        |
| dmm         | c           | vs         | 179      |
| dpwr        | 45          | th         | 4        |
| dmf         | 13100       | ai         | cdc ph   |

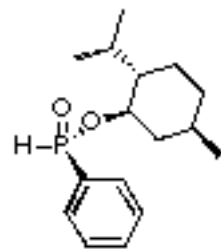

Compound (S<sub>p</sub>)-1  
<sup>1</sup>H NMR

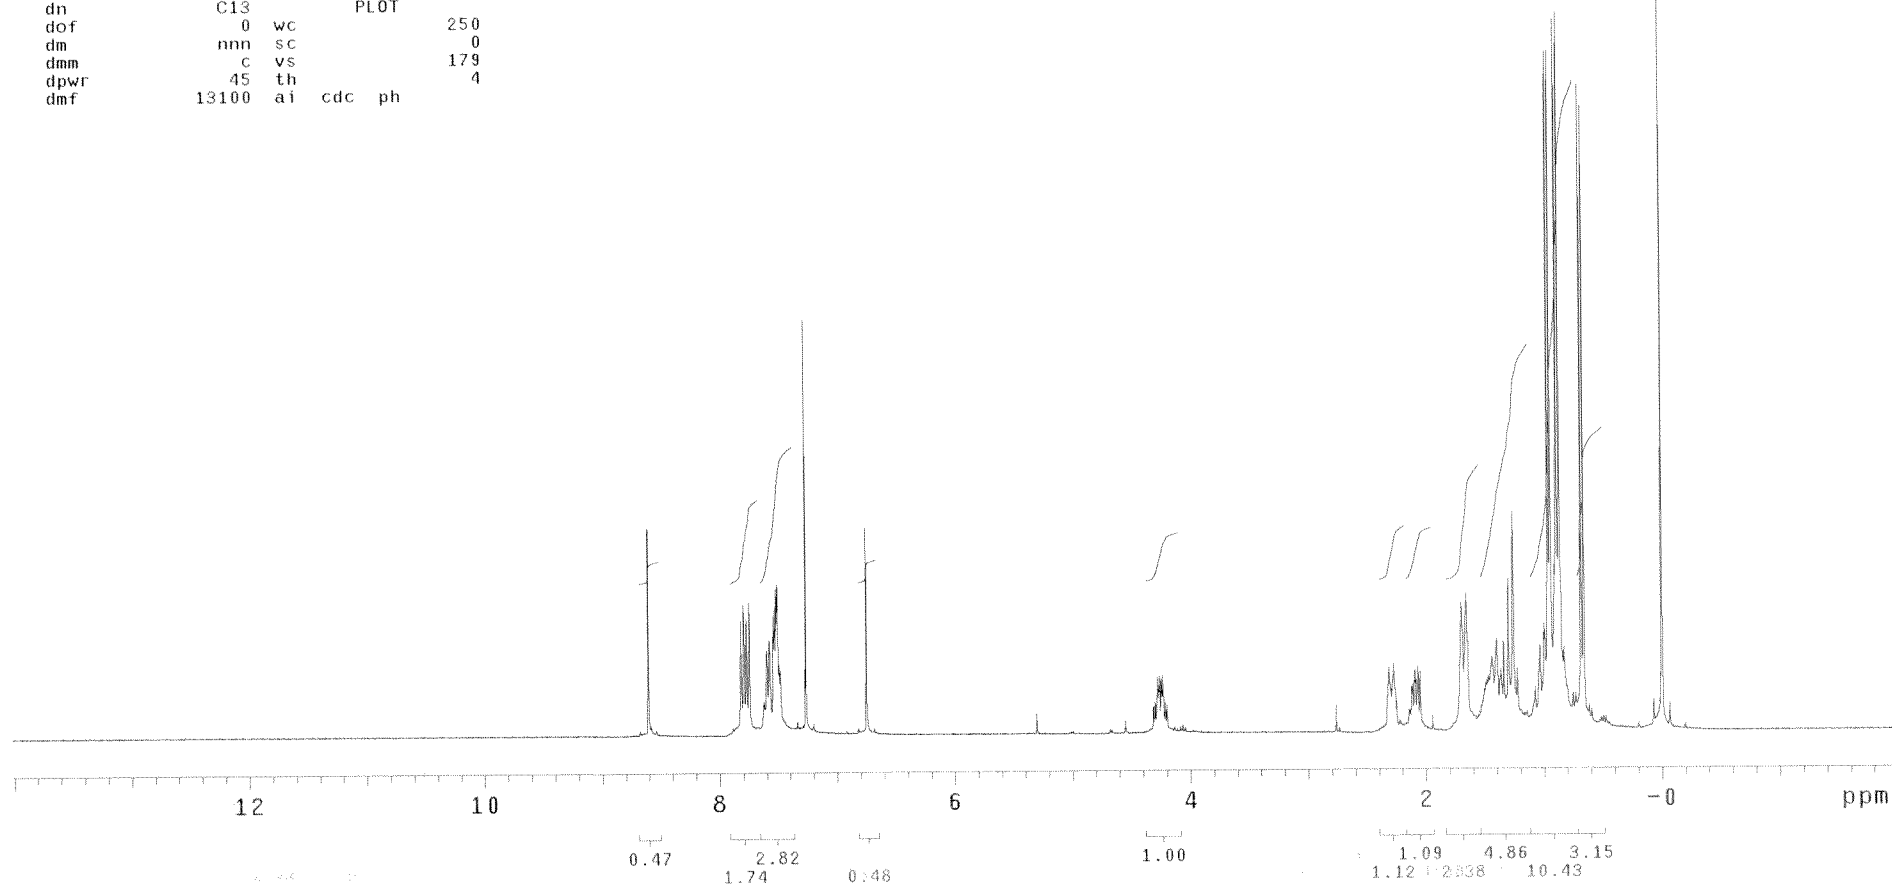

OB 953  
pad=10 run with findz0 before acquisition

exp10 Phosphorus

| SAMPLE              |                | SPECIAL    |          |
|---------------------|----------------|------------|----------|
| date                | Feb 14 2013    | temp       | not used |
| solvent             | cdc13          | gain       | 25       |
| file                | /home/TCUuser~ | spin       | 20       |
| /vnmrsys/data/auto~ |                | hst        | 0.008    |
| _2013.02.14/s_2013~ |                | pw90       | 18.300   |
| 0214_12/data/cdc13~ |                | alfa       | 10.000   |
| 01.fid              |                | FLAGS      |          |
| ACQUISITION         |                | PROCESSING |          |
| sw                  | 15797.8        | il         | n        |
| at                  | 1.600          | in         | n        |
| np                  | 50552          | dp         | y        |
| fb                  | 8800           | hs         | ny       |
| bs                  | 64             | lb         | 1.00     |
| d1                  | 1.000          | fn         | not used |
| nt                  | 64             | DISPLAY    |          |
| ct                  | 64             | sp         | -3647.3  |
| TRANSMITTER         |                | wp         | 15797.3  |
| tn                  | P31            | rfl        | 3647.8   |
| sfrq                | 121.465        | rfp        | 0        |
| tof                 | 7421.1         | rp         | 105.2    |
| tpwr                | 55             | lp         | -113.7   |
| pw                  | 9.150          | PLOT       |          |
| DECOUPLER           |                | wc         | 250      |
| dn                  | H1             | sc         | 0        |
| dof                 | 0              | vs         | 163      |
| dm                  | yyy            | th         | 21       |
| dmm                 | w              | ai         | cdc ph   |
| dpwr                | 35             |            |          |
| dmf                 | 6700           |            |          |

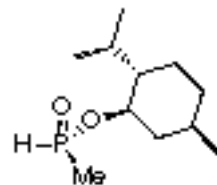

Compound (S<sub>p</sub>)-18  
<sup>31</sup>P/<sup>1</sup>H NMR decoupled

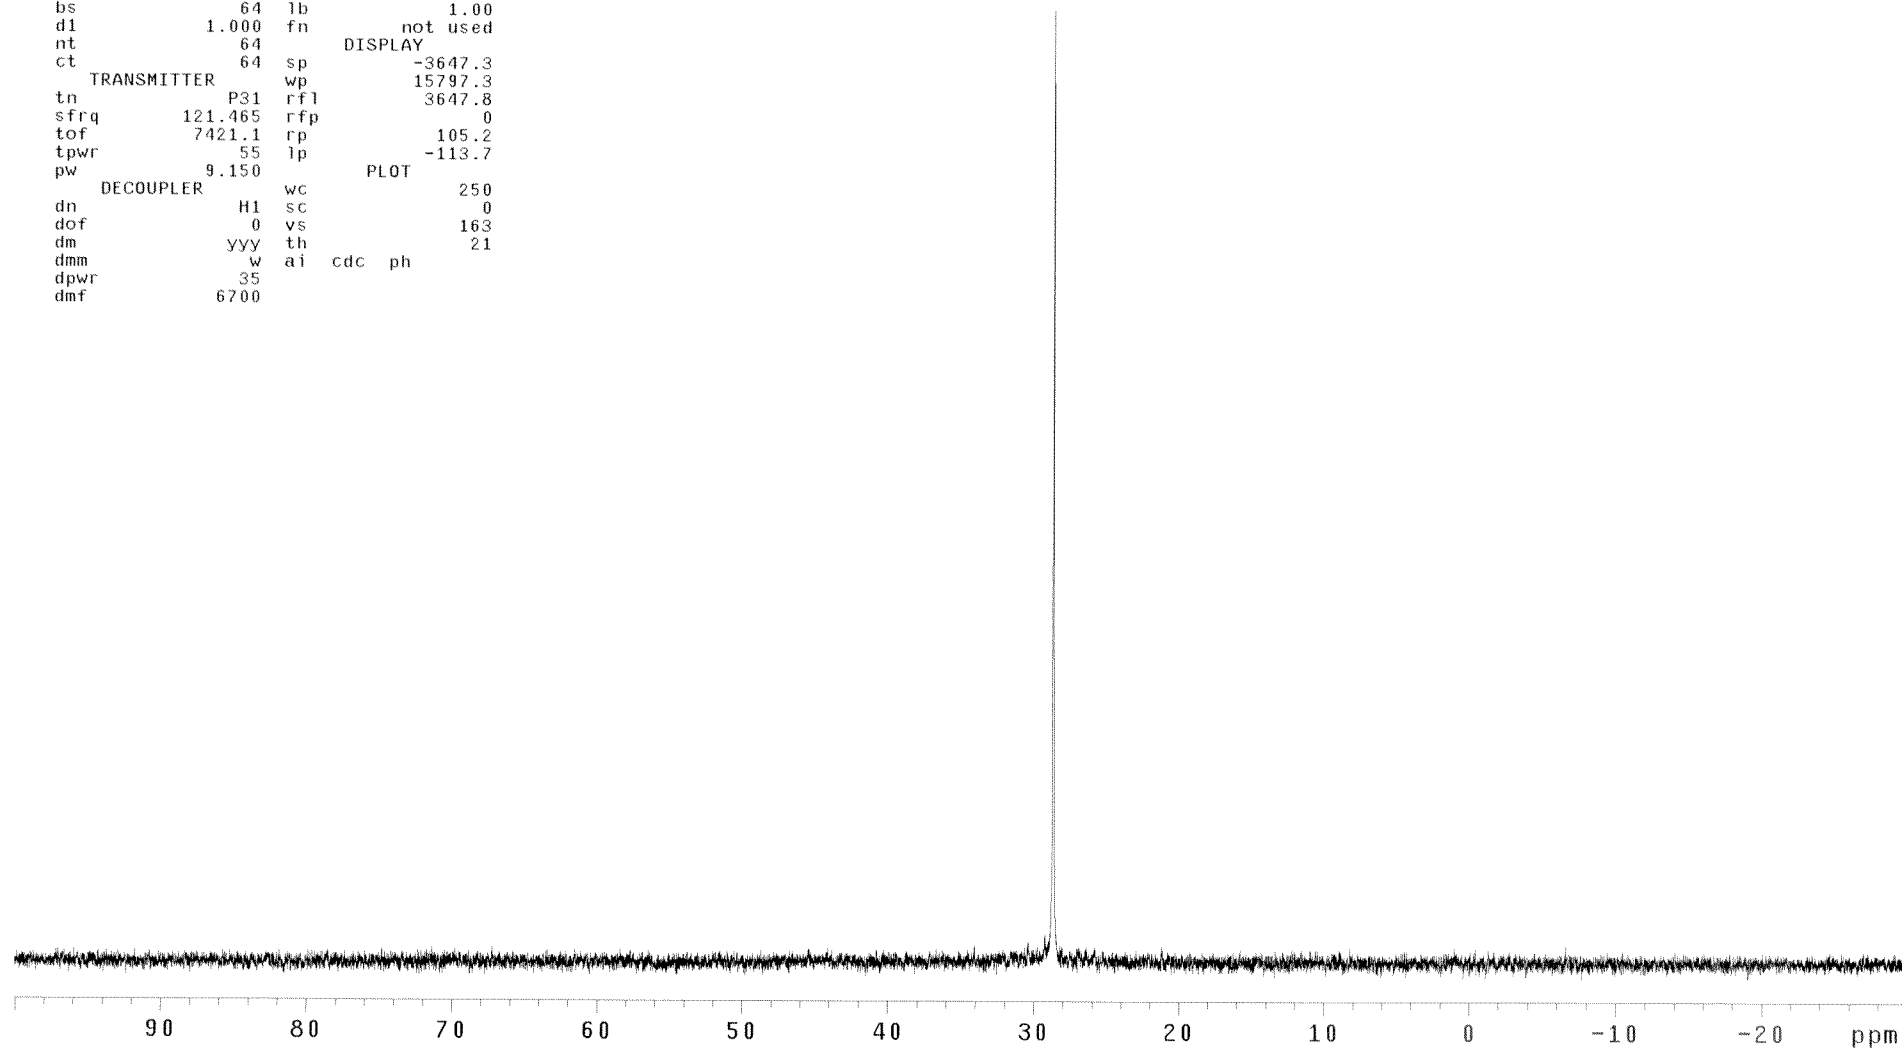

08 953

exp10 Phosphorus

| SAMPLE              |                | SPECIAL    |          |
|---------------------|----------------|------------|----------|
| date                | Feb 14 2013    | temp       | not used |
| solvent             | cdcl3          | gain       | 25       |
| file                | /home/TCUuser~ | spin       | 20       |
| /vnmrsys/data/auto~ |                | hst        | 0.008    |
| _2013.02.14/s_2013~ |                | pw90       | 18.300   |
| 0214_12/data/cdcl3~ |                | alfa       | 10.000   |
| _02.fid             |                | FLAGS      |          |
| ACQUISITION         |                | PROCESSING |          |
| sw                  | 15797.8        | il         | n        |
| at                  | 1.600          | in         | n        |
| np                  | 50552          | dp         | y        |
| fb                  | 8800           | hs         | ny       |
| bs                  | 64             | lb         | 1.00     |
| d1                  | 1.000          | fn         | not used |
| nt                  | 64             | DISPLAY    |          |
| ct                  | 64             | sp         | -3647.3  |
| TRANSMITTER         |                | wp         | 15797.3  |
| tn                  | P31            | rfl        | 3647.8   |
| sfrq                | 121.465        | rfl        | 0        |
| tof                 | 7421.1         | rp         | 113.7    |
| tpwr                | 55             | lp         | -113.7   |
| pw                  | 9.150          | PLOT       |          |
| DECOUPLER           |                | wc         | 250      |
| dn                  | H1             | sc         | 0        |
| dof                 | 0              | vs         | 357      |
| dm                  | ynn            | th         | 12       |
| dmm                 | w              | ai         | cdc ph   |
| dpwr                | 35             |            |          |
| dmf                 | 6700           |            |          |

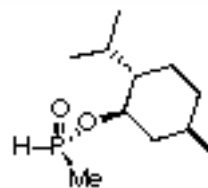

Compound (S<sub>p</sub>)-16  
<sup>31</sup>P/<sup>1</sup>H NMR coupled

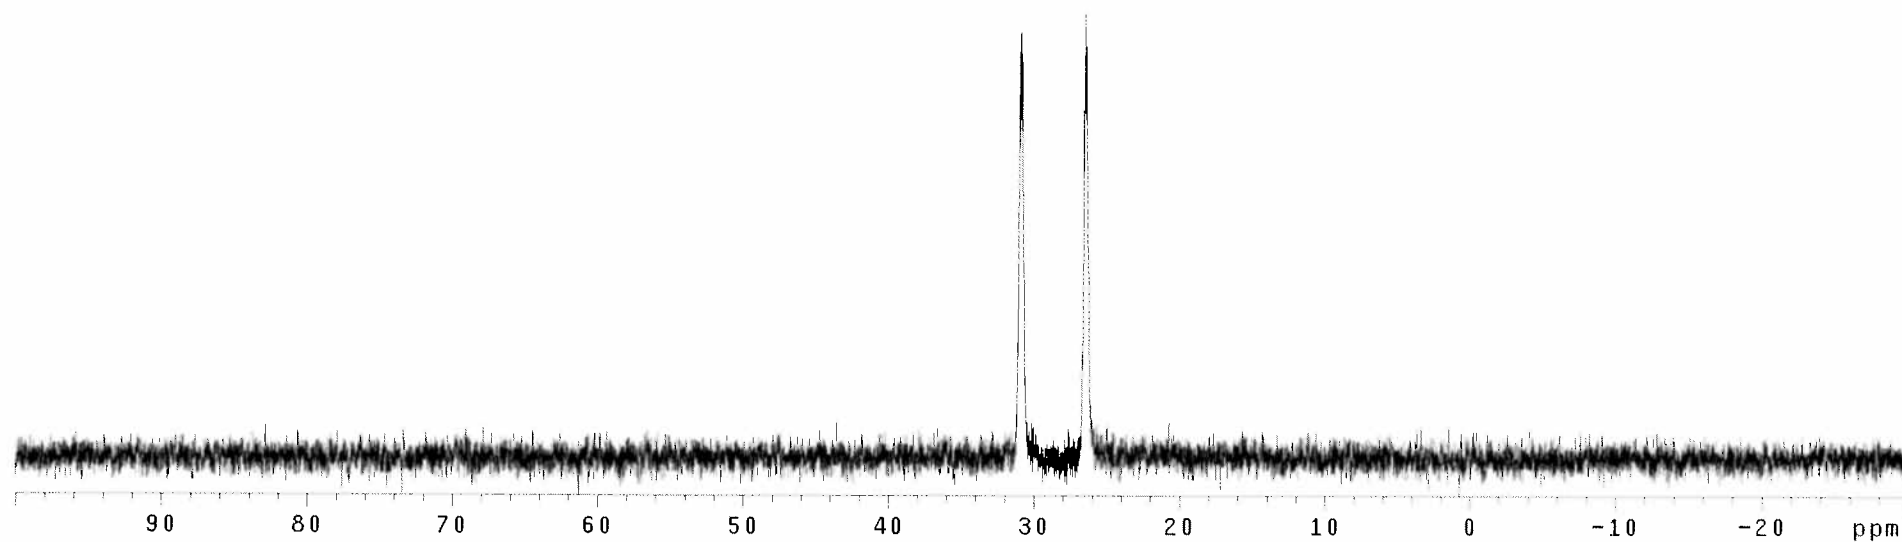

OB 970  
pad=10 run with findz0 before acquisition

exp10 Proton

```
SAMPLE      DEC. & VT
date Feb 20 2013 dfrq      75.454
solvent cdc13 dn          C13
file /home/TCUuser~ dpwr    43
/vnmrsys/data/auto~ dof     0
_2013.02.14/s_2013~ dm      nnn
0220_27/data/cdc13~ dmm     c
_01.fid dmf      13100

ACQUISITION  PROCESSING
sfrq      300.047 wtfile
tn         H1  proc      ft
at         1.998 fn       not used
np         19184
sw         4800.8 werr     xmreact
fb         2600  wexp abortoff flus~
bs         16    h procplot aborton
tpwr      55    wbs
pw         7.9  wnt
d1         1.000
tof        277.9
nt         32
ct         32
alock      y
gain       not used

FLAGS
il         n
in         n
dp         y

DISPLAY
sp        -596.6
wp        4800.5
vs        251
sc         0
wc         240
hzmm      20.00
is        419.69
rfl       596.9
rfp        0
th         2
ins        1.000
ai cdc ph
```

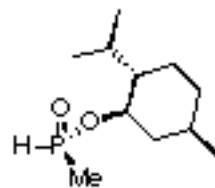

Compound (S<sub>p</sub>)-16  
<sup>1</sup>H NMR

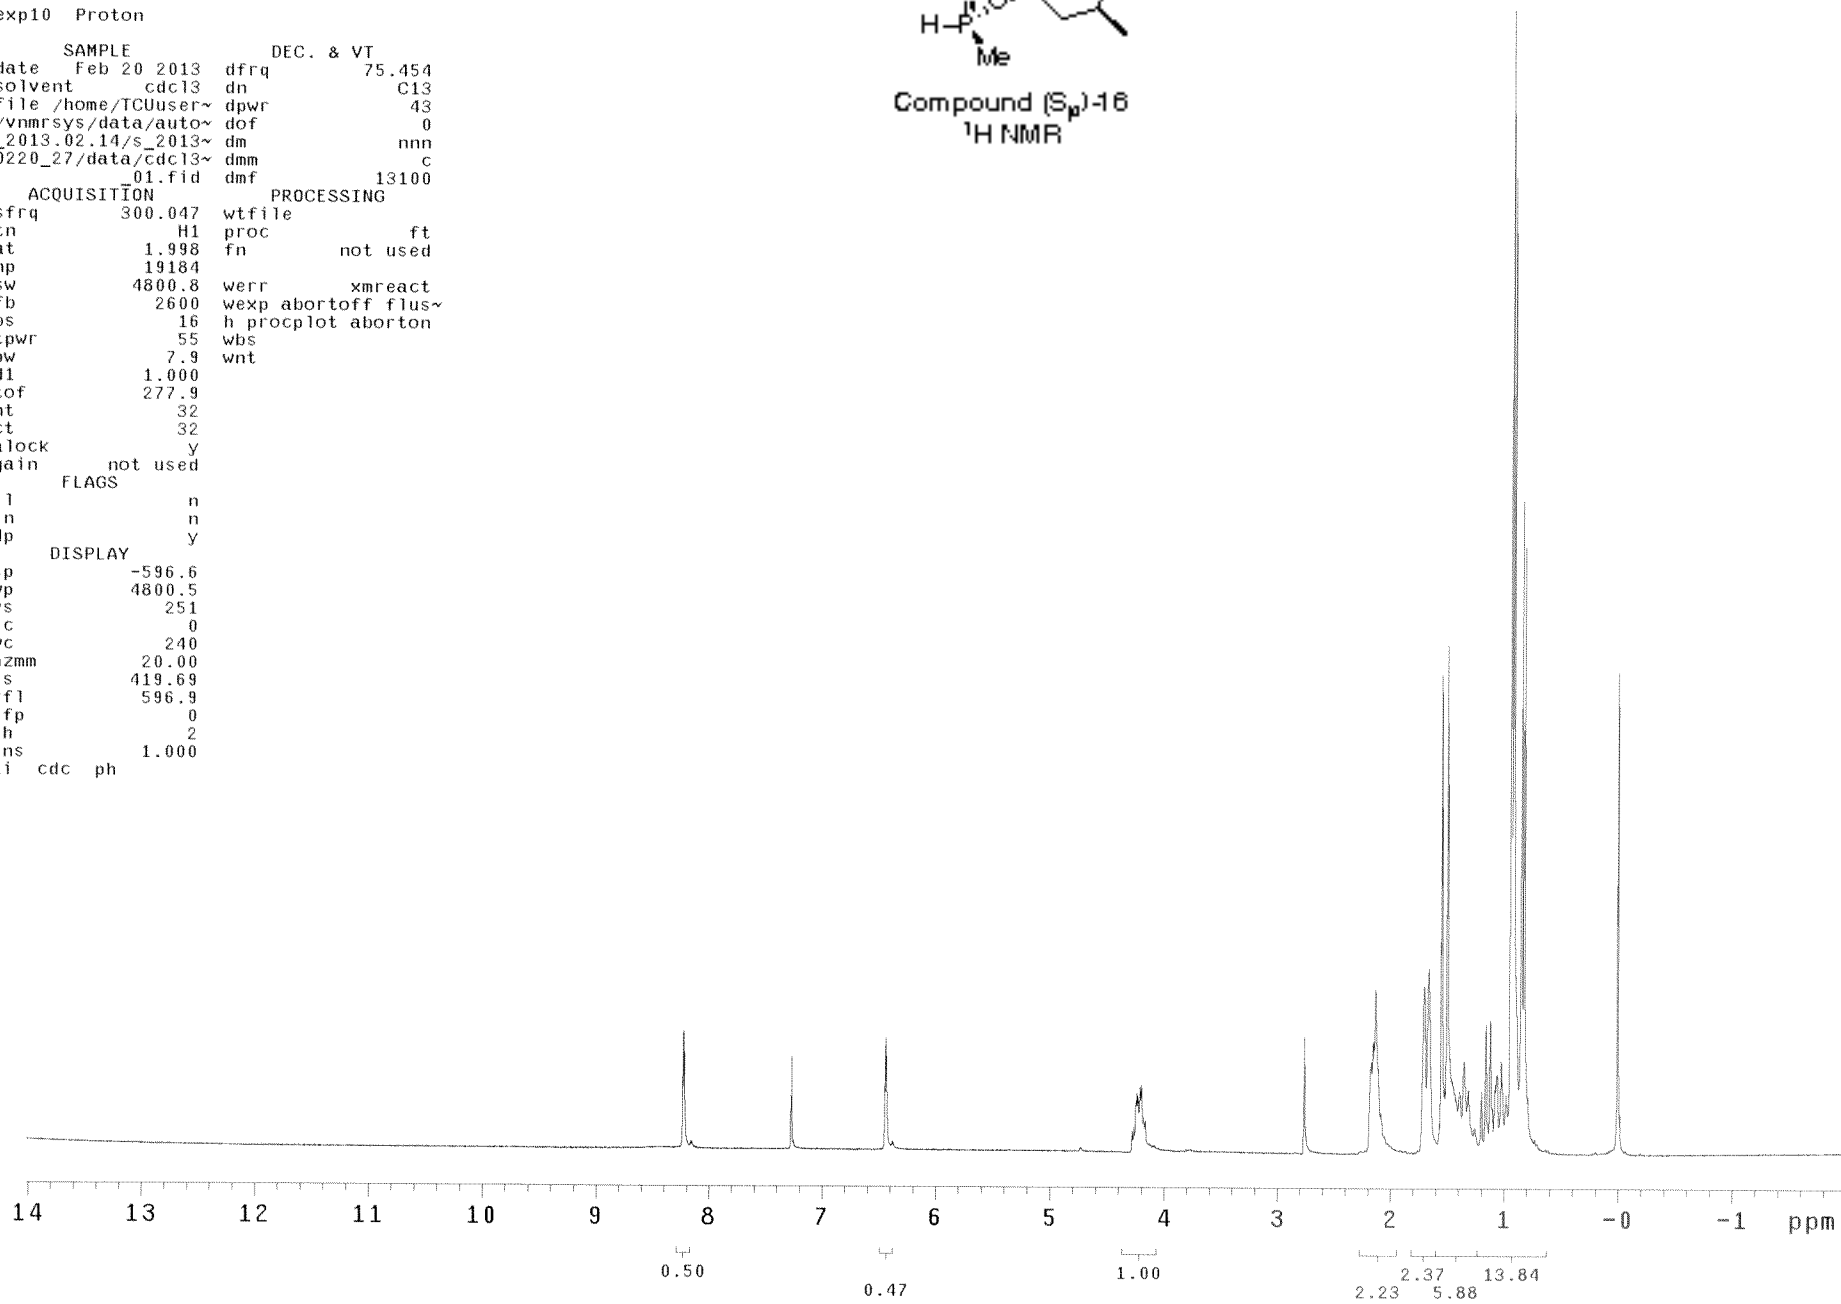



OB 970

exp10 Carbon

```
SAMPLE          SPECIAL
date   Feb 20 2013  temp      not used
solvent cdc13      gain       20
file   /home/TCUuser~ spin     20
/vnmrsys/data/auto~ hst       0.008
_2013.02.14/s_2013~ pw90    18.500
0220_28/data/cdc13~ alfa    10.000
_06.fid
ACQUISITION     FLAGS
sw      18115.9  in        n
at      1.301   dp        y
np      47120   hs        nn
fb      10000
bs      64      lb        0.50
d1      2.000   fn        not used
nt      800
ct      800    sp        -1135.5
TRANSMITTER     wp        18115.4
tn      C13    rfl       1136.1
sfrq    75.454 rfp       0
tof     766.0  rp        55.8
tpwr    58     lp        -160.4
pw      9.250
DECOUPLER      PLOT
dn      H1     wc        250
dof     0     sc        0
dm      YYY   vs        256
dmm     w     th        4
dpwr    35   ai      cdc ph
dmf     6700
```

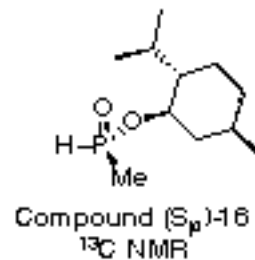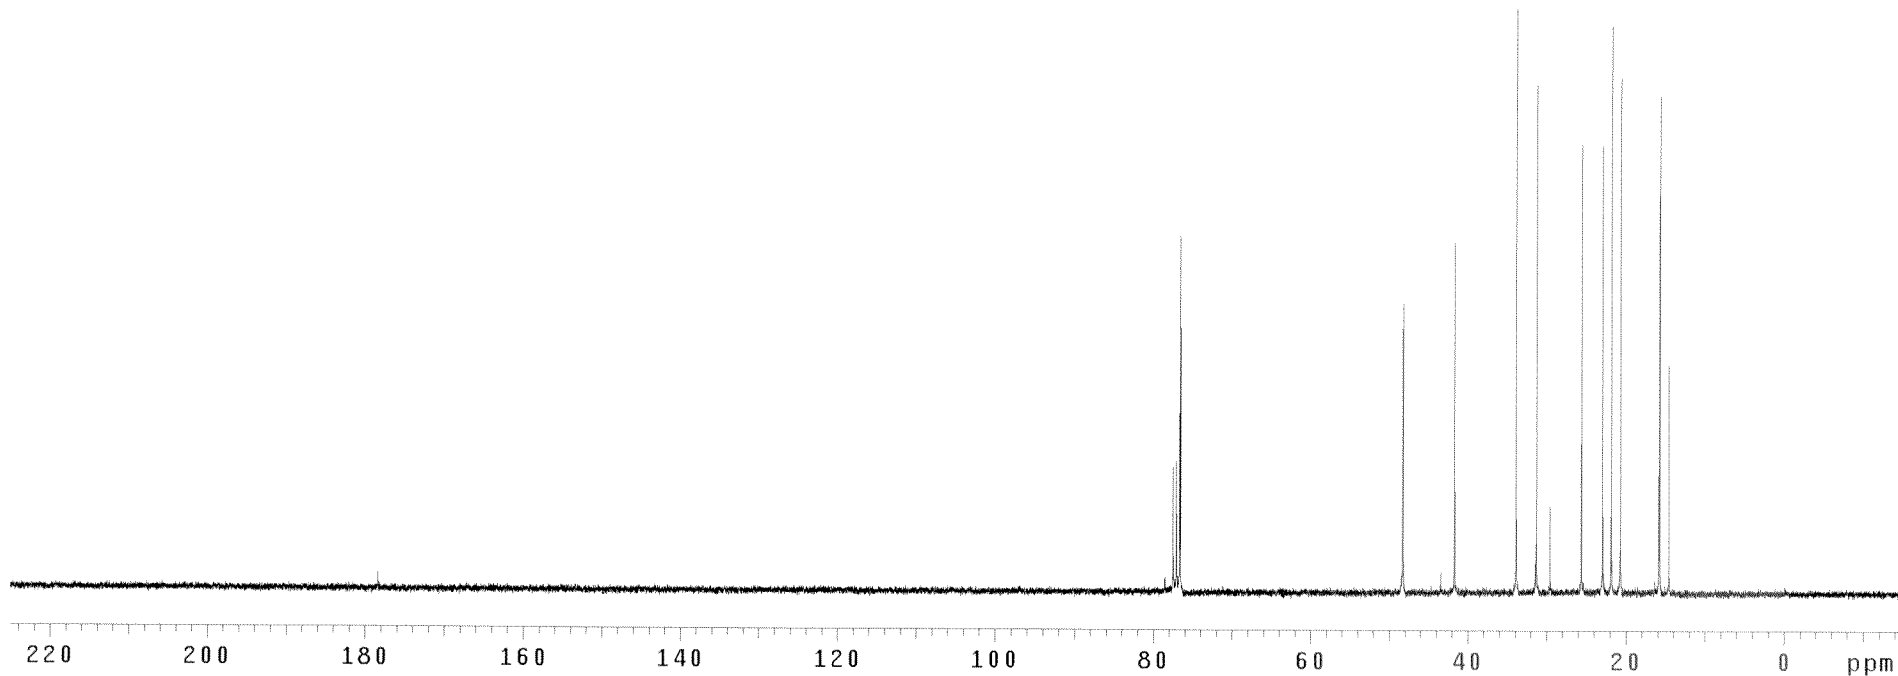

OB 949  
pad=10 run with findz0 before acquisition

exp1 Phosphorus

| SAMPLE              |                | SPECIAL    |          |
|---------------------|----------------|------------|----------|
| date                | Feb 9 2013     | temp       | not used |
| solvent             | cdc13          | gain       | 20       |
| file                | /home/TCUuser~ | spin       | 20       |
| /vnmrsys/data/auto~ |                | hst        | 0.008    |
| _2013.02.09/s_2013~ |                | pw90       | 18.300   |
| 0209_05/data/cdc13~ |                | alfa       | 10.000   |
| _02.fid             |                | FLAGS      |          |
| ACQUISITION         |                | PROCESSING |          |
| sw                  | 15797.8        | il         | n        |
| at                  | 1.600          | in         | n        |
| np                  | 50552          | dp         | y        |
| fb                  | 8800           | hs         | ny       |
| bs                  | 64             | lb         | 1.00     |
| d1                  | 1.000          | fn         | not used |
| nt                  | 16             | fn         | not used |
| ct                  | 16             | sp         | -3647.3  |
| TRANSMITTER         |                | DISPLAY    |          |
| tn                  | P31            | wp         | 15797.3  |
| sfrq                | 121.465        | rf1        | 3647.8   |
| tof                 | 7421.1         | rfp        | 0        |
| tpwr                | 55             | rp         | 136.0    |
| pw                  | 9.150          | lp         | -124.4   |
| DECOUPLER           |                | PLOT       |          |
| dn                  | H1             | wc         | 250      |
| dof                 | 0              | sc         | 0        |
| dm                  | yyy            | vs         | 7        |
| dmm                 | w              | th         | 12       |
| dpwr                | 35             | ai         | cdc ph   |
| dmf                 | 6700           |            |          |

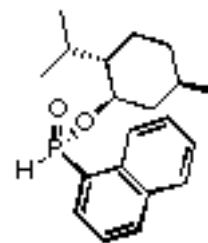

Compound (S<sub>p</sub>)-17  
<sup>31</sup>P/<sup>1</sup>H NMR decoupled

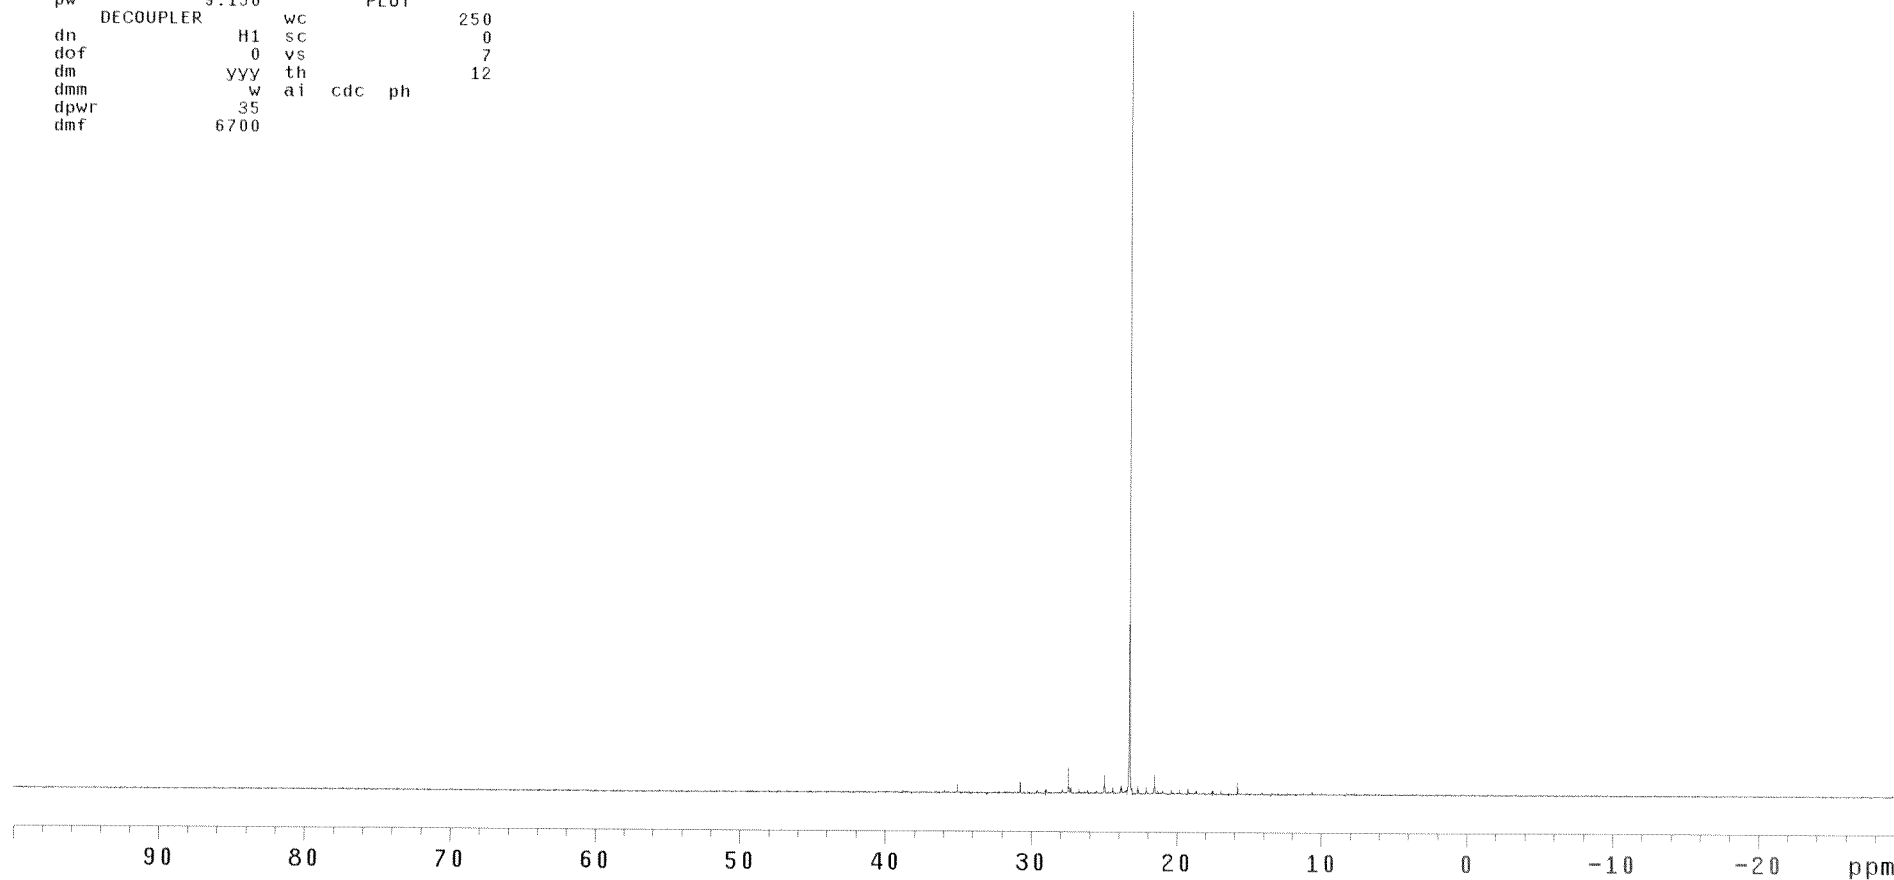

OB 949

exp1 Phosphorus

```
SAMPLE          SPECIAL
date Feb 9 2013 temp not used
solvent cdc13 gain 20
file /home/TCUser~/spin 20
/vnmrSYS/data/auto~ hst 0.008
_2013.02.09/s_2013~ pw90 18.300
0209_05/data/cdc13~ alfa 10.000
_04.fid          FLAGS
ACQUISITION    il n
sw 15797.8 in n
at 1.600 dp y
np 50552 hs ny
fb 8800
bs 64 lb PROCESSING 1.00
d1 1.000 fn not used
nt 16 DISPLAY
ct 16 sp -3647.3
TRANSMITTER    wp 15797.3
tn P31 rfl 3647.8
sfrq 121.465 rfp 0
tof 7421.1 rp 130.0
tpwr 55 lp -114.3
pw 9.150 PLOT
DECOUPLER      wc 250
dn H1 sc 0
dof 0 vs 111
dm ynn th 6
dmm w ai cdc ph
dpwr 35
dmf 6700
```

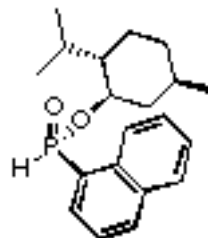

Compound (S<sub>p</sub>)-17  
<sup>31</sup>P/<sup>1</sup>H NMR coupled

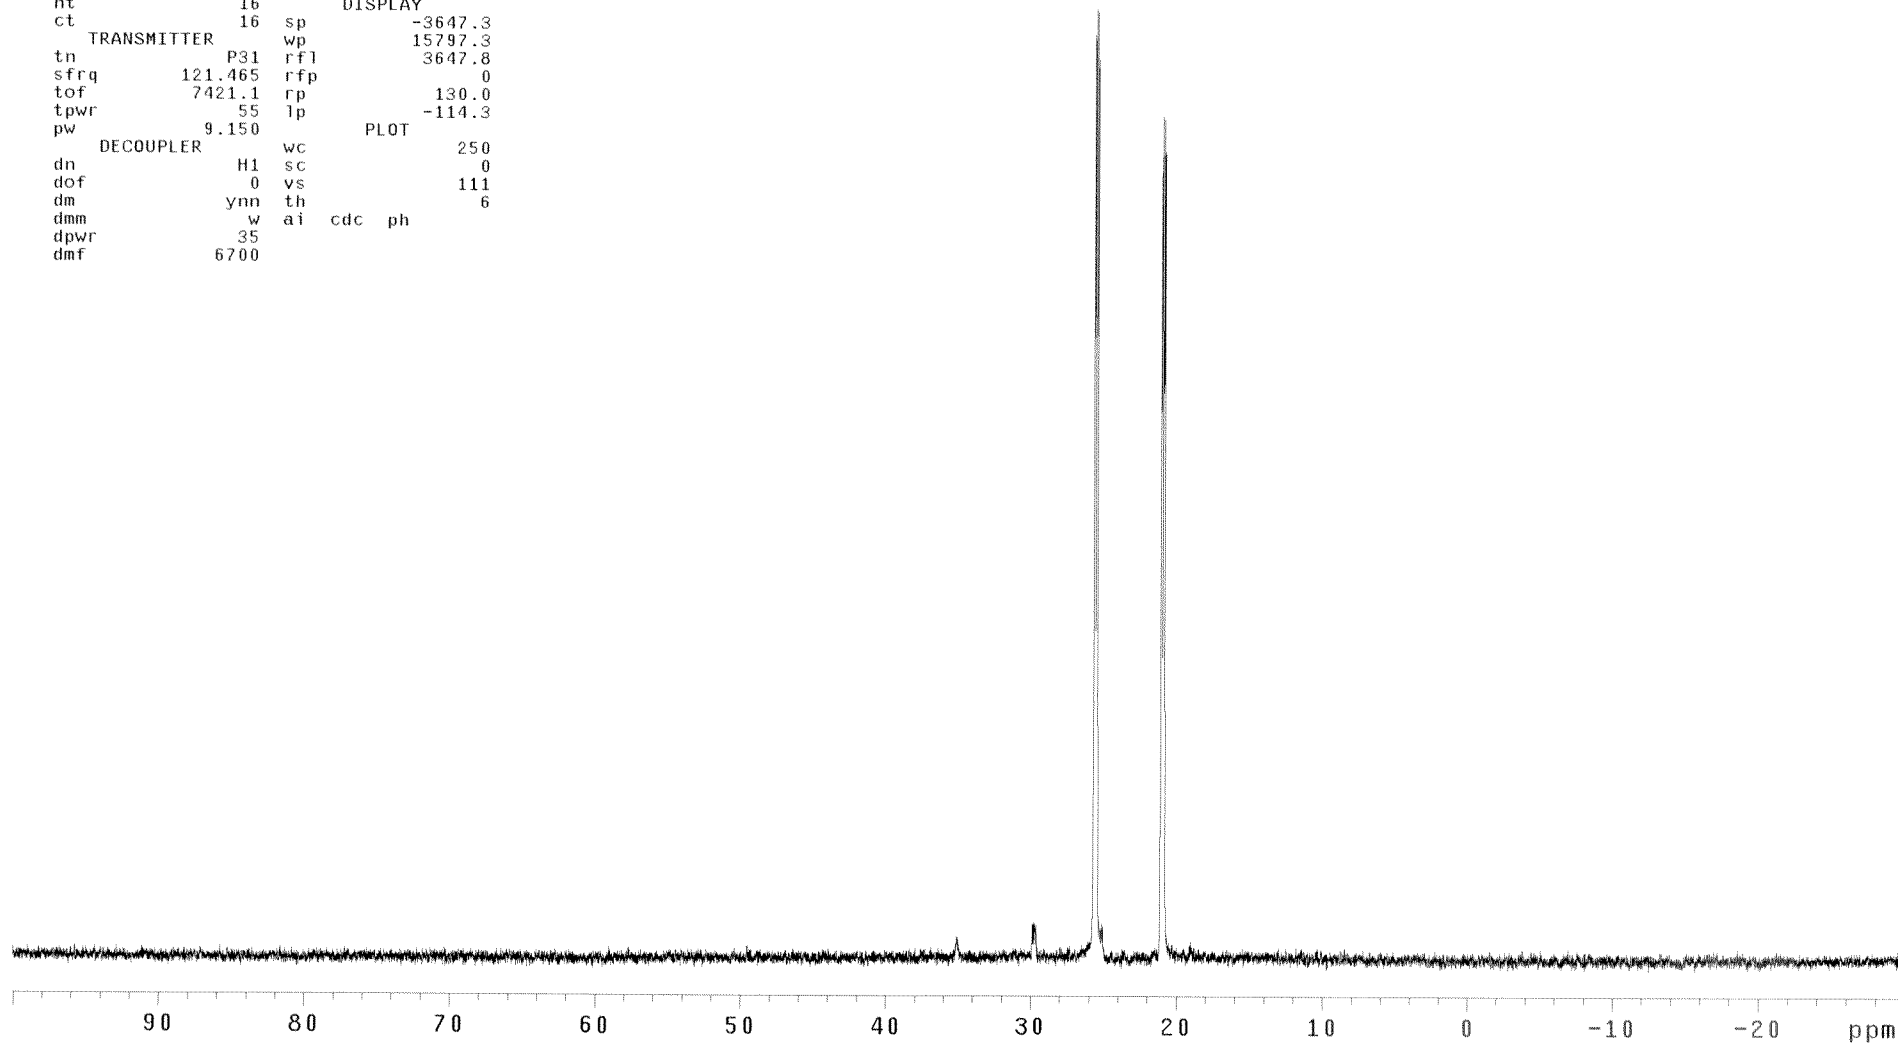

OB 952  
pad=10 run with findz0 before acquisition

exp1 Proton

| SAMPLE              |                | DEC. & VT |        |
|---------------------|----------------|-----------|--------|
| date                | Feb 9 2013     | dfrq      | 75.454 |
| solvent             | cdc13          | dn        | C13    |
| file                | /home/TCUuser~ | dpwr      | 43     |
| /vnmrsys/data/auto~ |                | doe       | 0      |
| _2013.02.09/s_2013~ |                | dm        | nnn    |
| 0209_04/data/cdc13~ |                | dmm       | c      |
| _01.fid             |                | dmg       | 13100  |

  

| ACQUISITION |          | PROCESSING |                  |
|-------------|----------|------------|------------------|
| sfrq        | 300.047  | wtfile     |                  |
| tn          | H1       | proc       | ft               |
| at          | 1.998    | fn         | not used         |
| np          | 19184    |            |                  |
| sw          | 4800.8   | werr       | xmreact          |
| fb          | 2600     | wexp       | abortoff flus~   |
| bs          | 16       | h          | procplot aborton |
| tpwr        | 55       | wbs        |                  |
| pw          | 7.9      | wnt        |                  |
| d1          | 1.000    |            |                  |
| tof         | 277.9    |            |                  |
| nt          | 16       |            |                  |
| ct          | 16       |            |                  |
| alock       | y        |            |                  |
| gain        | not used |            |                  |

  

| FLAGS |   |
|-------|---|
| il    | n |
| in    | n |
| dp    | y |

  

| DISPLAY |        |
|---------|--------|
| sp      | -597.2 |
| wp      | 4800.5 |
| vs      | 257    |
| sc      | 0      |
| wc      | 240    |
| hzmm    | 20.00  |
| is      | 554.72 |
| rfl     | 597.5  |
| rfp     | 0      |
| th      | 2      |
| ins     | 1.000  |
| ai      | cdc ph |

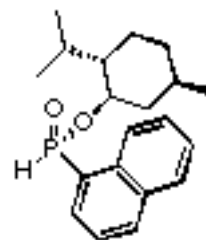

Compound (S<sub>p</sub>)-17  
<sup>1</sup>H NMR

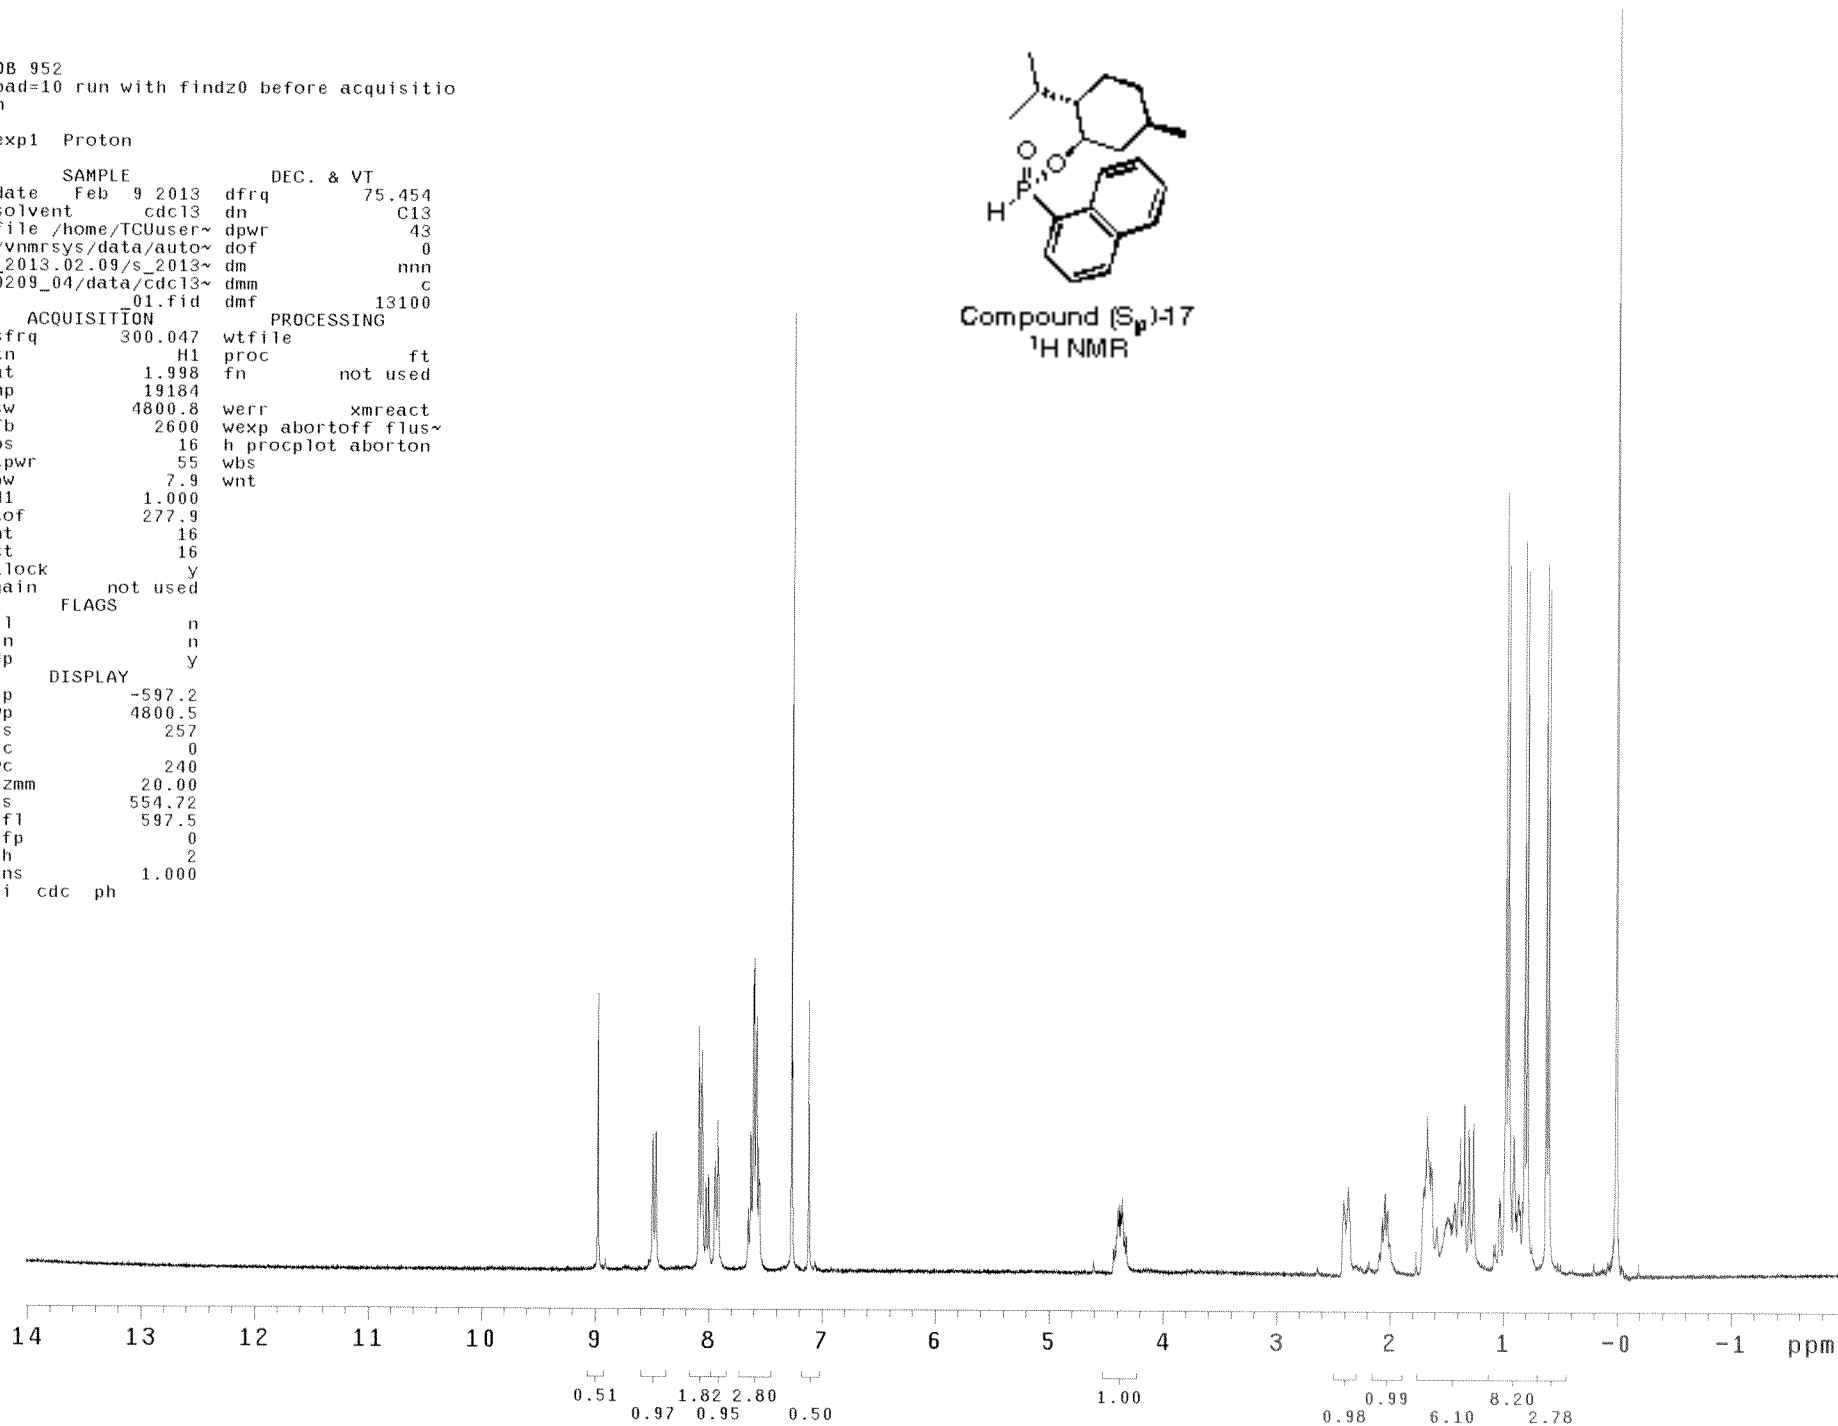

OB 949

exp1 Carbon

```
SAMPLE          SPECIAL
date Feb 9 2013 temp not used
solvent cdc13 gain 20
file /home/TCUuser~ spin 20
/vnmrsys/data/auto~ hst 0.008
_2013.02.09/s_2013~ pw90 18.500
0209_05/data/cdc13~ a1fa 10.000
_05.fid          FLAGS
ACQUISITION     il n
sw 18115.9 in n
at 1.301 dp y
np 47120 hs nn
fb 10000
bs 64 lb PROCESSING 0.50
dl 2.000 fn not used
nt 1600 ct DISPLAY
ct 1600 sp -1135.5
TRANSMITTER     wp 18115.4
tn C13 rfl 1136.1
sfrq 75.454 rfp 0
tof 766.0 rp 61.2
tpwr 58 lp -197.6
pw 9.250 PLOT
DECOUPLER       wc 250
dn H1 sc 0
dof 0 vs 396
dm yyy th 6
dmm w ai cdc ph
dpwr 35
dmf 6700
```

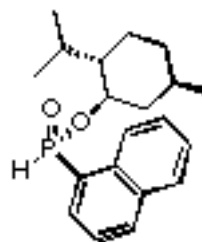

Compound (S<sub>P</sub>)-17  
13C NMR

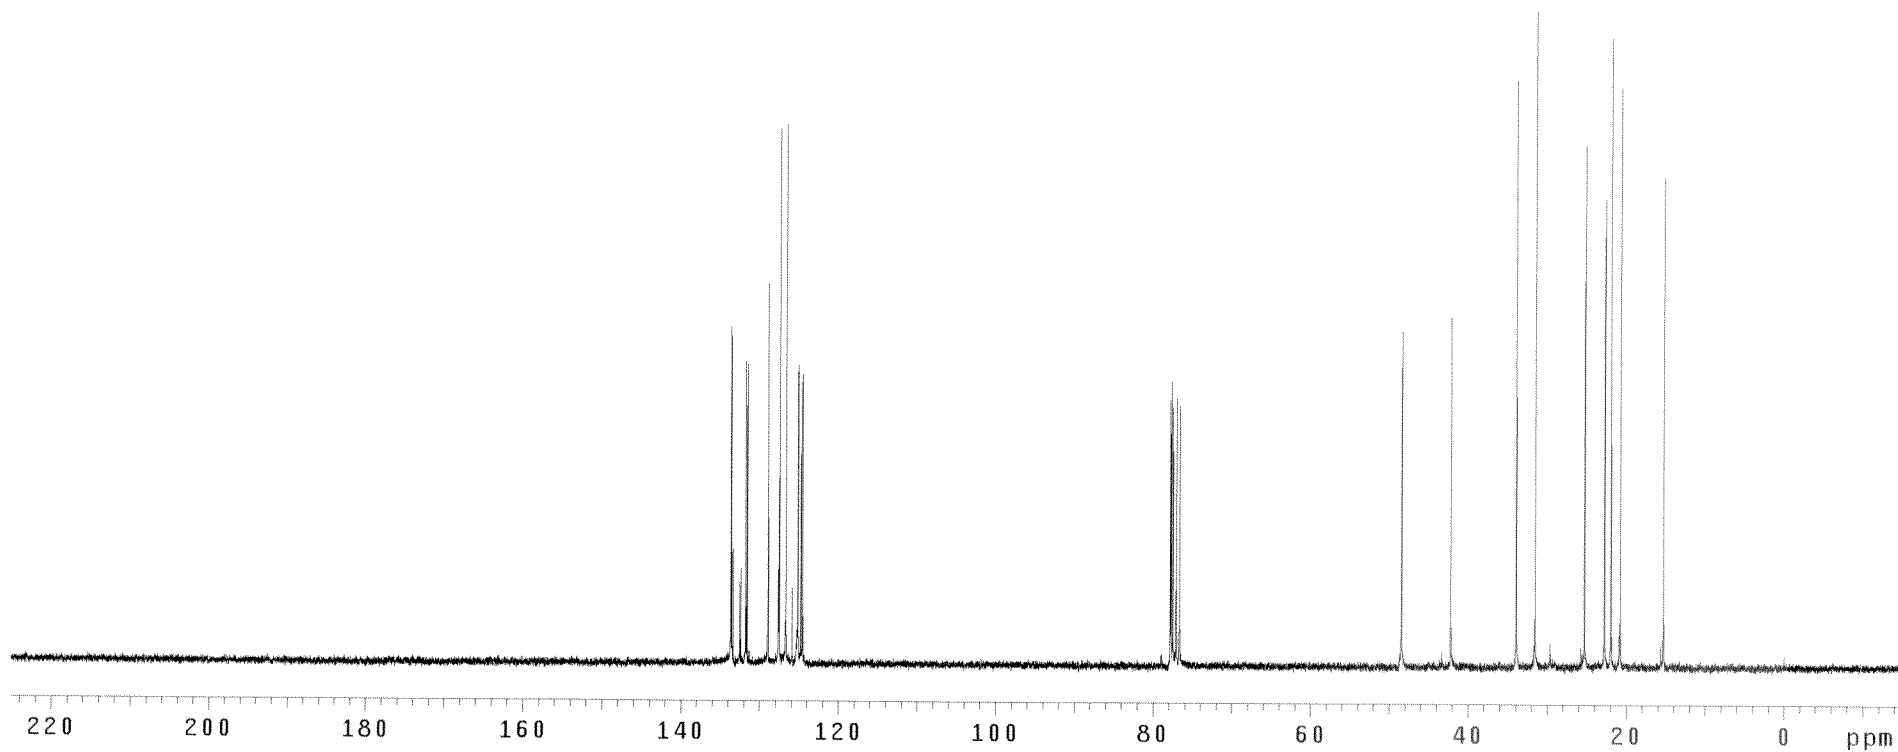

OB 948  
pad=10 run with findz0 before acquisition

exp1 Phosphorus

| SAMPLE               |               | SPECIAL    |          |
|----------------------|---------------|------------|----------|
| date                 | Feb 11 2013   | temp       | not used |
| solvent              | cdcl3         | gain       | 25       |
| file                 | /home/TCUser~ | spin       | 20       |
| /vnmr/sys/data/auto~ |               | hst        | 0.008    |
| _2013.02.09/s_2013~  |               | pw90       | 18.300   |
| 0211_20/data/cdcl3~  |               | alpha      | 10.000   |
|                      | 01.fid        |            |          |
| ACQUISITION          |               | FLAGS      |          |
| sw                   | 15797.8       | il         | n        |
| at                   | 1.600         | in         | n        |
| np                   | 50552         | dp         | y        |
| fb                   | 8800          | hs         | ny       |
|                      |               | PROCESSING |          |
| bs                   | 64            | lb         | 1.00     |
| d1                   | 1.000         | fn         | not used |
| nt                   | 16            |            |          |
| ct                   | 16            | sp         | -3647.3  |
| TRANSMITTER          |               | wp         | 15797.3  |
| tn                   | P31           | rfl        | 3647.8   |
| sfrq                 | 121.465       | rfp        | 0        |
| tof                  | 7421.1        | rp         | 113.6    |
| tpwr                 | 55            | lp         | -113.7   |
| pw                   | 9.150         |            |          |
| DECOUPLER            |               | PLOT       |          |
| dn                   | H1            | wc         | 250      |
| dof                  | 0             | sc         | 0        |
| dm                   | YYY           | vs         | 14       |
| dmm                  | w             | th         | 11       |
| dpwr                 | 35            | ai         | cdc ph   |
| dmf                  | 6700          |            |          |

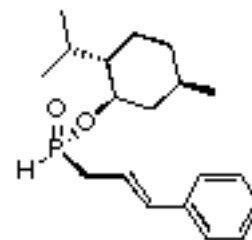

Compound (S<sub>p</sub>)-18  
<sup>31</sup>P/<sup>1</sup>H NMR decoupled

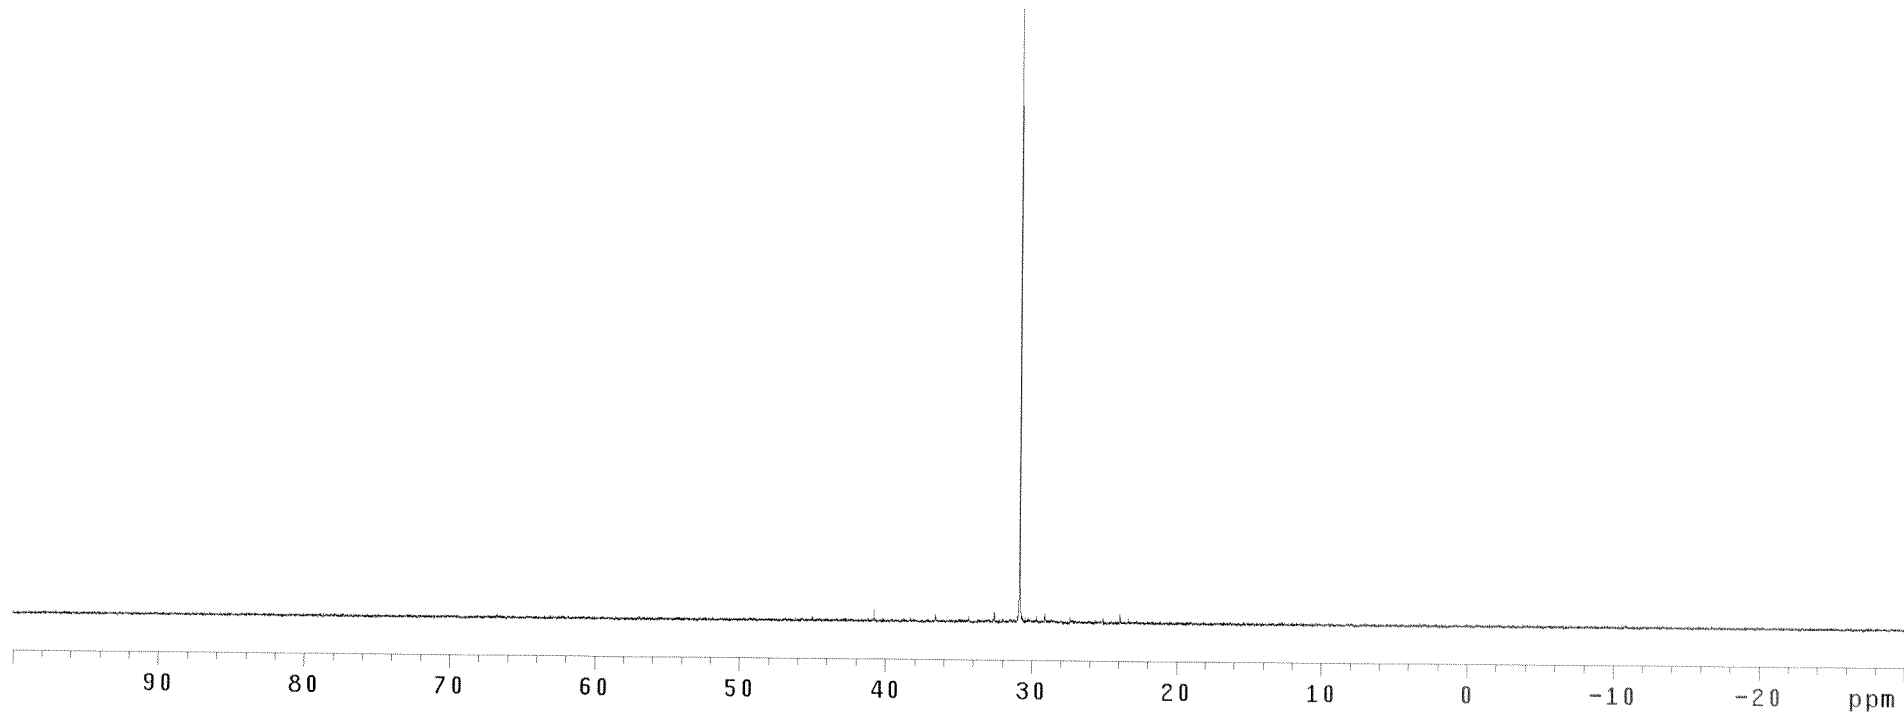

08 948

exp1 Phosphorus

```
SAMPLE          SPECIAL
date Feb 11 2013 temp not used
solvent cdc13 gain 25
file /home/TCUuser~ spin 20
/vnmrsys/data/auto~ hst 0.008
_2013.02.09/s_2013~ pw90 18.300
0211_20/data/cdc13~ alfa 10.000
02.fid          FLAGS
ACQUISITION    il n
sw 15797.8 in n
at 1.600 dp y
np 50552 hs ny
fb 8800
bs 64 ib 1.00
d1 1.000 fn not used
nt 16
ct 16 sp
TRANSMITTER    wp -3647.3
tn P31 rfl 15797.3
sfrq 121.465 rfp 3647.8
tof 7421.1 rp 0
tpwr 55 lp -142.4
pw 9.150 lp -336.5
DECOUPLER      wc PLOT 250
dn H1 sc 0
dof 0 vs 178
dm ynn th 12
dmm w ai cdc ph
dpwr 35
dmf 6700
```

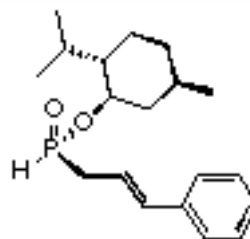

Compound (S<sub>p</sub>)-18  
<sup>31</sup>P/<sup>1</sup>H NMR coupled

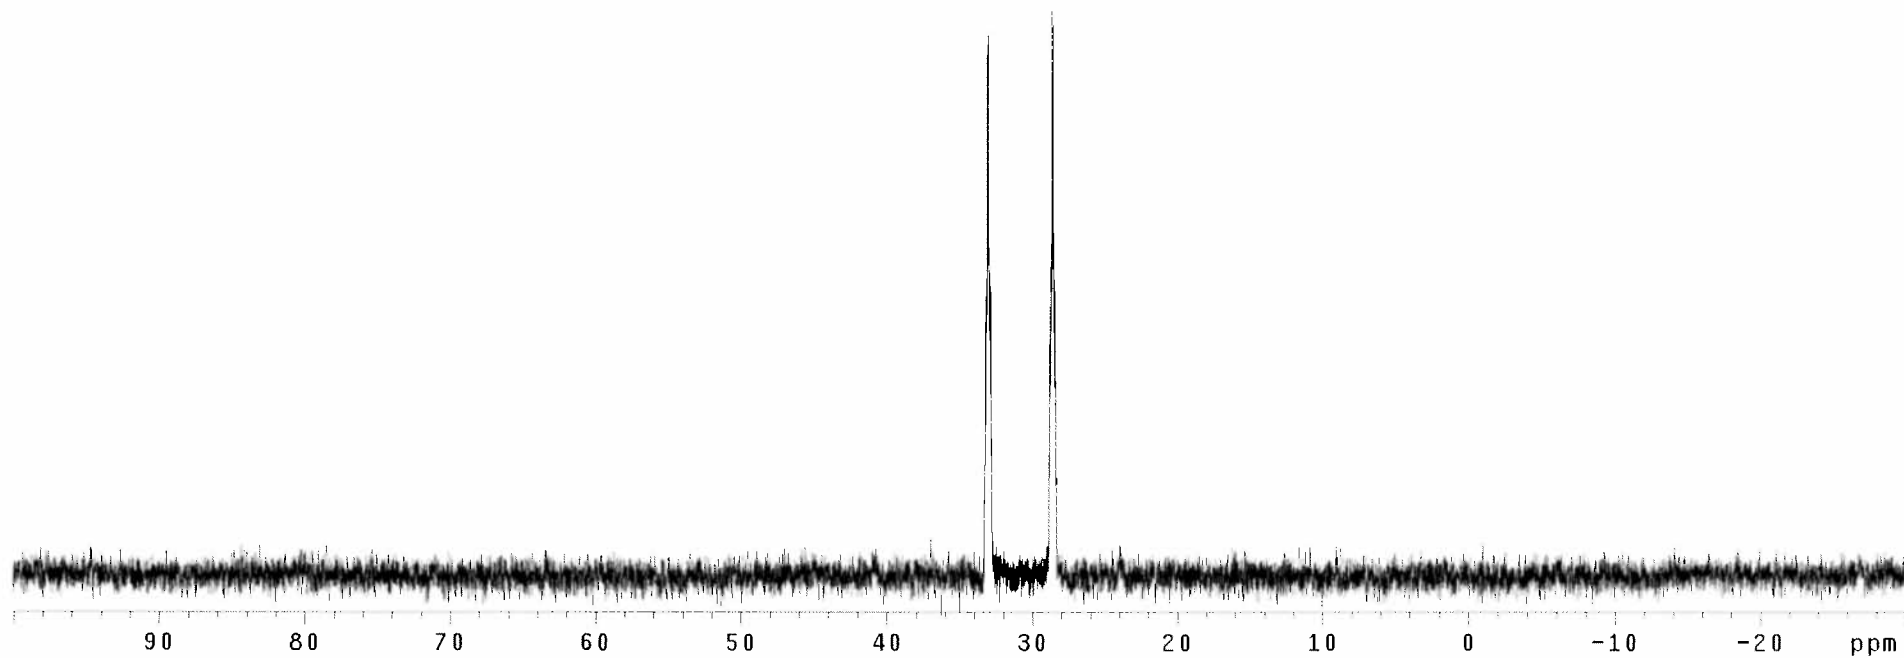

OB 948  
pad=10 run with findz0 before acquisition

exp1 Proton

SAMPLE DEC. & VT  
date Feb 11 2013 dfrq 75.454  
solvent cdc13 dn C13  
file /home/TCUuser~ dpwr 43  
/vnmrsys/data/auto~ dof 0  
\_2013.02.09/s\_2013~ dm nnn  
0211\_19/data/cdc13~ dmm c  
\_01.fid dmf 13100

ACQUISITION PROCESSING  
sfrq 300.047 wtf file  
tn H1 proc ft  
at 1.998 fn not used  
np 19184  
sw 4800.8 werr xmreact  
fb 2600 wexp abortoff flus~  
bs 16 h procplot aborton  
tpwr 55 wbs  
pw 7.9 wnt  
d1 1.000  
tof 277.9  
nt 16  
ct 16  
alock y  
gain not used

FLAGS  
il n  
in n  
dp y

DISPLAY  
sp -596.6  
wp 4800.5  
vs 317  
sc 0  
wc 240  
hzmm 20.00  
is 567.89  
rfl 596.9  
rfp 0  
th 4  
ins 1.000  
ai cdc ph

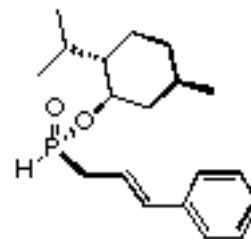

Compound (S<sub>p</sub>)-18  
<sup>1</sup>H NMR

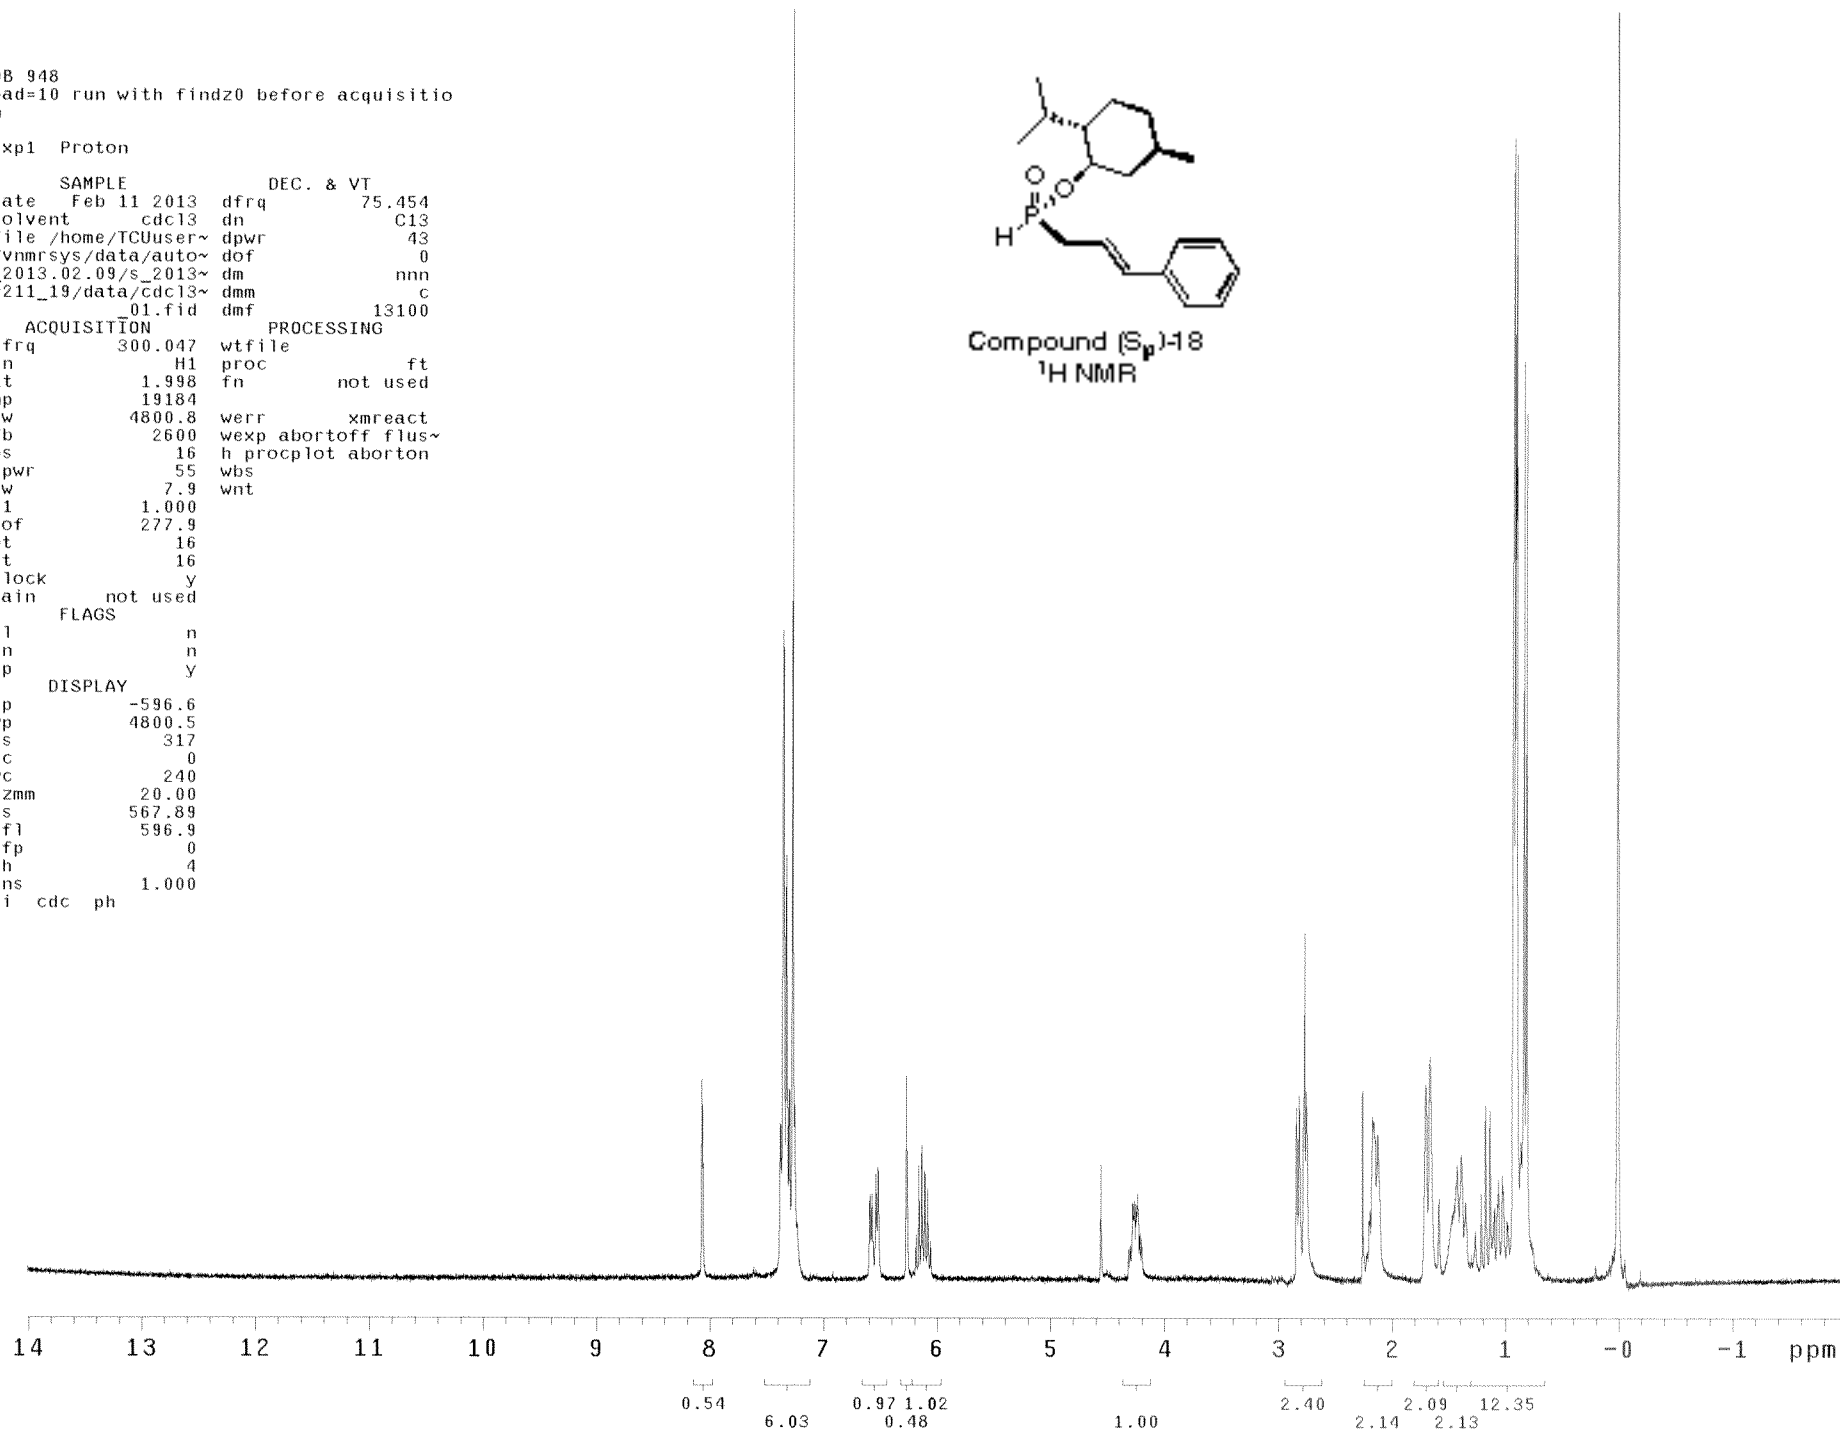



DB 948

exp1 Carbon

```
SAMPLE          SPECIAL
date Feb 11 2013 temp      not used
solvent cdc13    gain      20
file /home/TCUuser~ spin    20
/vnmrsys/data/auto~ hst     0.008
_2013.02.09/s_2013~ pw90   18.500
0211_20/data/cdc13~ alfa   10.000
  03.fid
ACQUISITION     FLAGS
sw 18115.9      in      n
at 1.301       dp      n
np 47120       hs      y
fb 10000
bs 64         lb      0.50
d1 2.000      fn      not used
nt 650
ct 650       sp      -1135.5
TRANSMITTER     wp      18115.4
tn C13        rf1     1136.1
sfrq 75.454  rfp     0
tof 766.0    rp      55.8
tpwr 58      lp      -193.3
pw 9.250
DECOUPLER      wc      250
dn H1         sc      0
dof 0        vs      1156
dm  yy       th      10
dmm w        ai      cdc ph
dpwr 35
dmf 6700
```

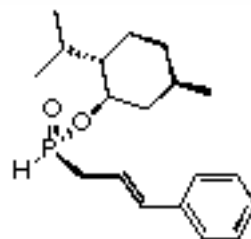

Compound (S<sub>p</sub>)-18  
<sup>13</sup>C NMR

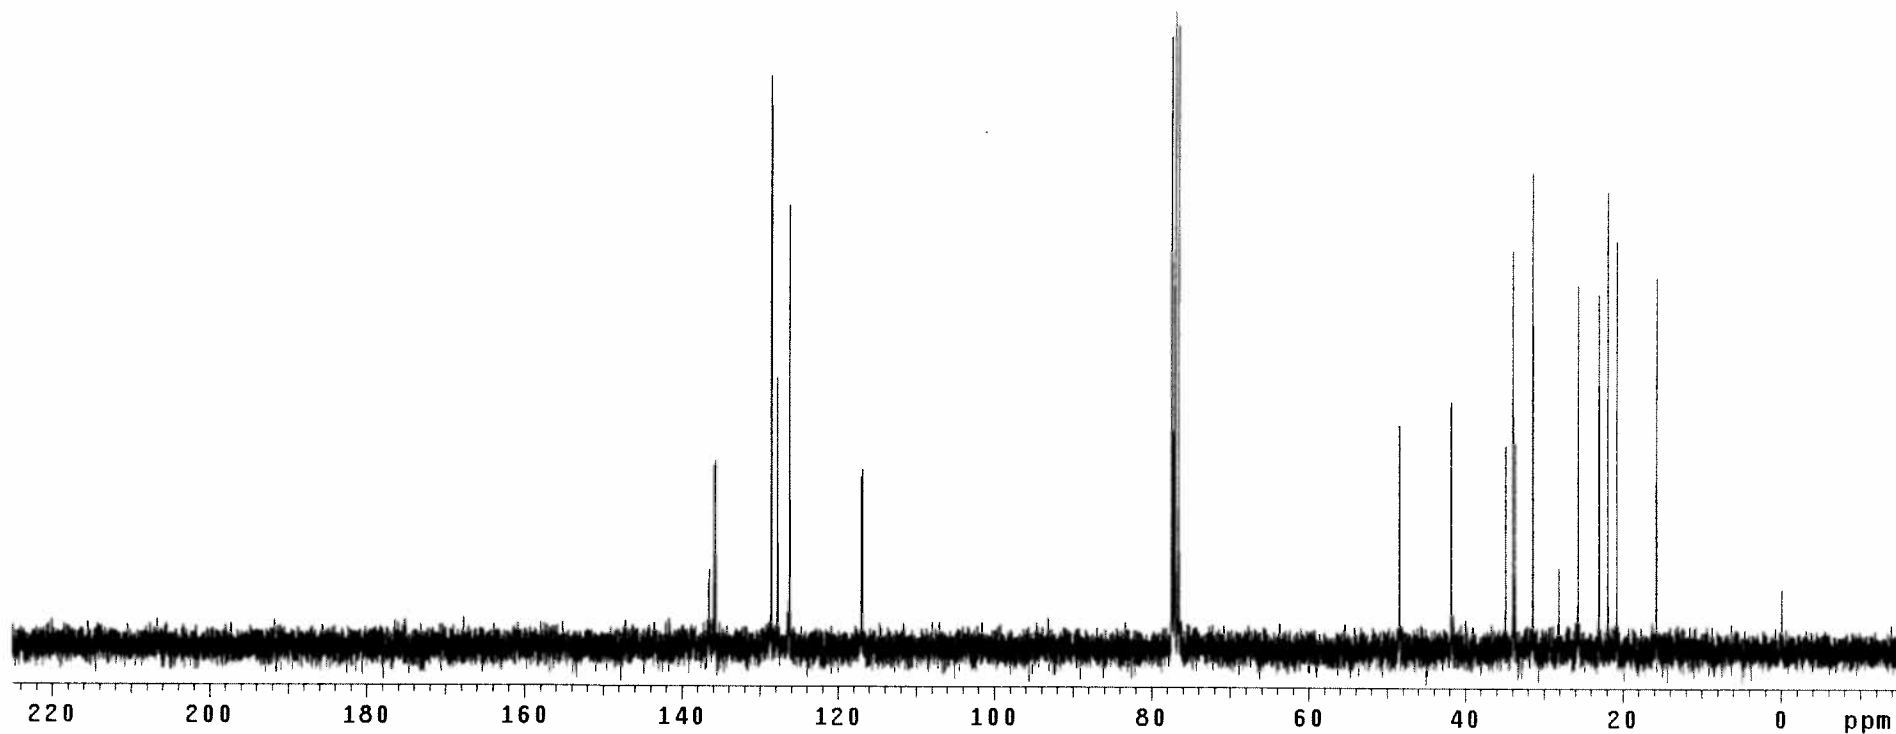

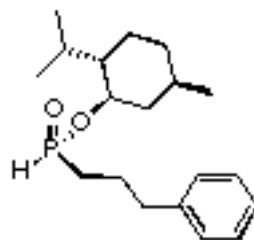

Compound (S<sub>p</sub>)-19  
<sup>31</sup>P/<sup>1</sup>H NMR decoupled

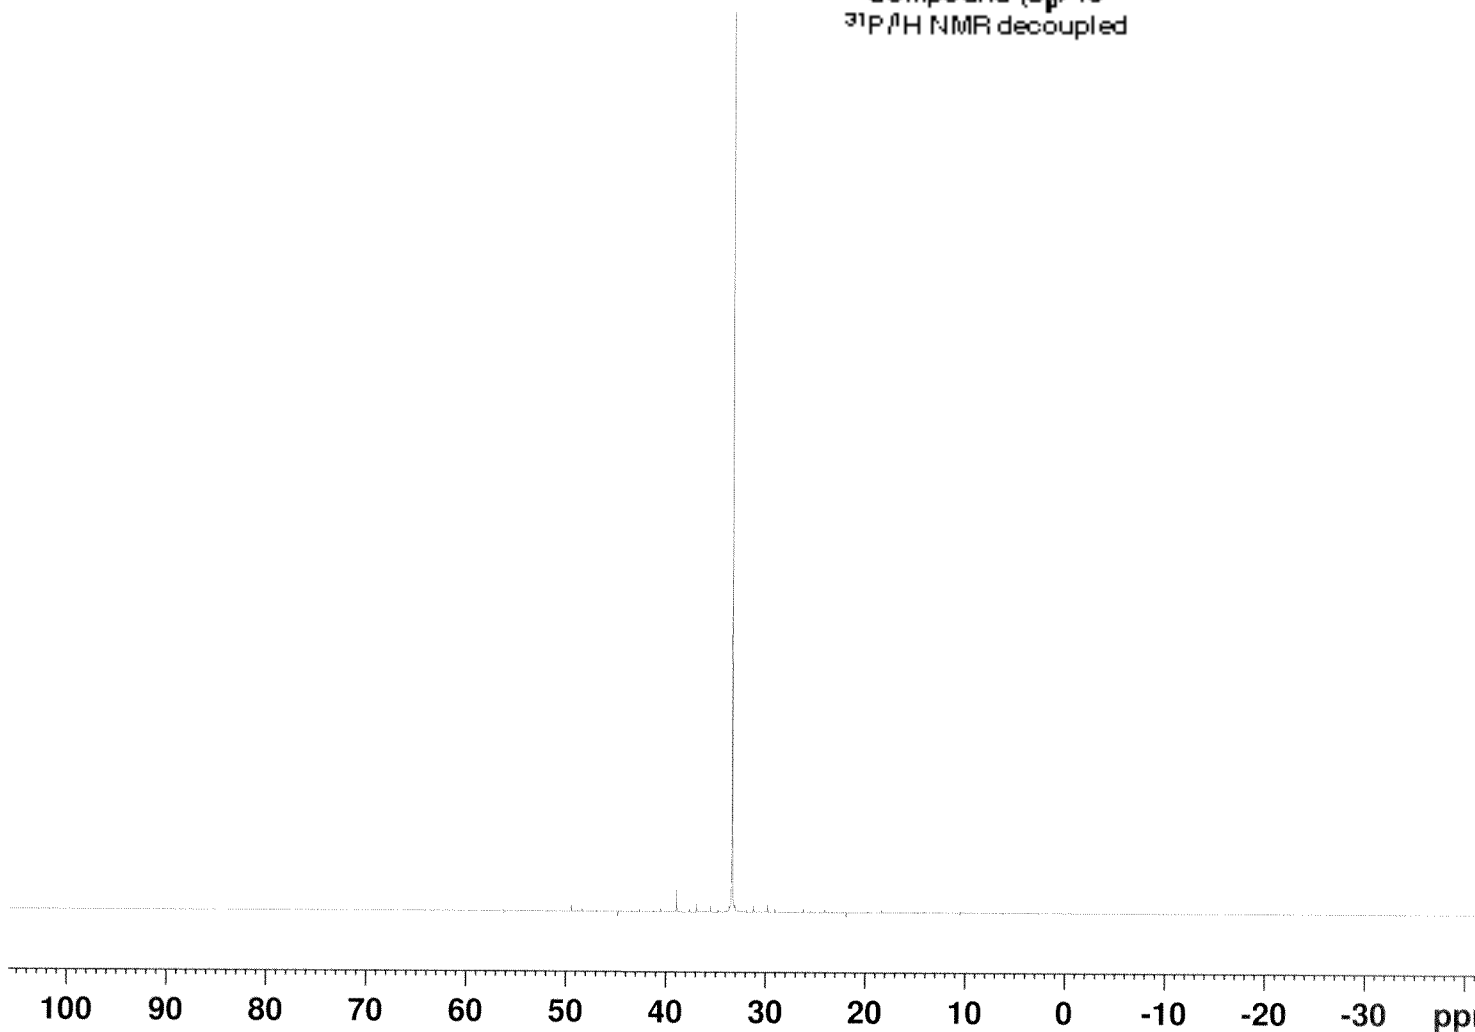

2.14  
 97.86

Current Data Parameters  
 NAME OB 2095 after column  
 EXPNO 1  
 PROCNO 1

F2 - Acquisition Parameters  
 Date\_ 20150630  
 Time 9.38  
 INSTRUM spect  
 PROBHD 5 mm PABBO BB/  
 PULPROG zgpg30  
 TD 65536  
 SOLVENT CDCl3  
 NS 16  
 DS 4  
 SWH 64102.563 Hz  
 FIDRES 0.978127 Hz  
 AQ 0.5111808 sec  
 RG 203.57  
 DW 7.800 usec  
 DE 6.50 usec  
 TE 294.4 K  
 D1 2.00000000 sec  
 D11 0.03000000 sec  
 TD0 1

==== CHANNEL f1 =====  
 SFO1 161.9674942 MHz  
 NUC1 31P  
 P1 14.25 usec  
 PLW1 15.00000000 W

==== CHANNEL f2 =====  
 SFO2 400.1316005 MHz  
 NUC2 1H  
 CPDPRG[2] waltz16  
 PCPD2 90.00 usec  
 PLW2 10.00000000 W  
 PLW12 0.31604999 W  
 PLW13 0.25600001 W

F2 - Processing parameters  
 SI 32768  
 SF 161.9755930 MHz  
 WDW EM  
 SSB 0  
 LB 1.00 Hz  
 GB 0  
 PC 1.40

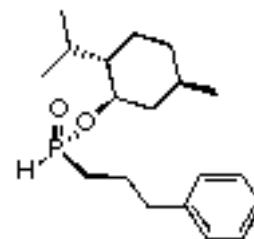

Compound (S<sub>N</sub>)-19  
<sup>31</sup>P/<sup>1</sup>H NMR coupled

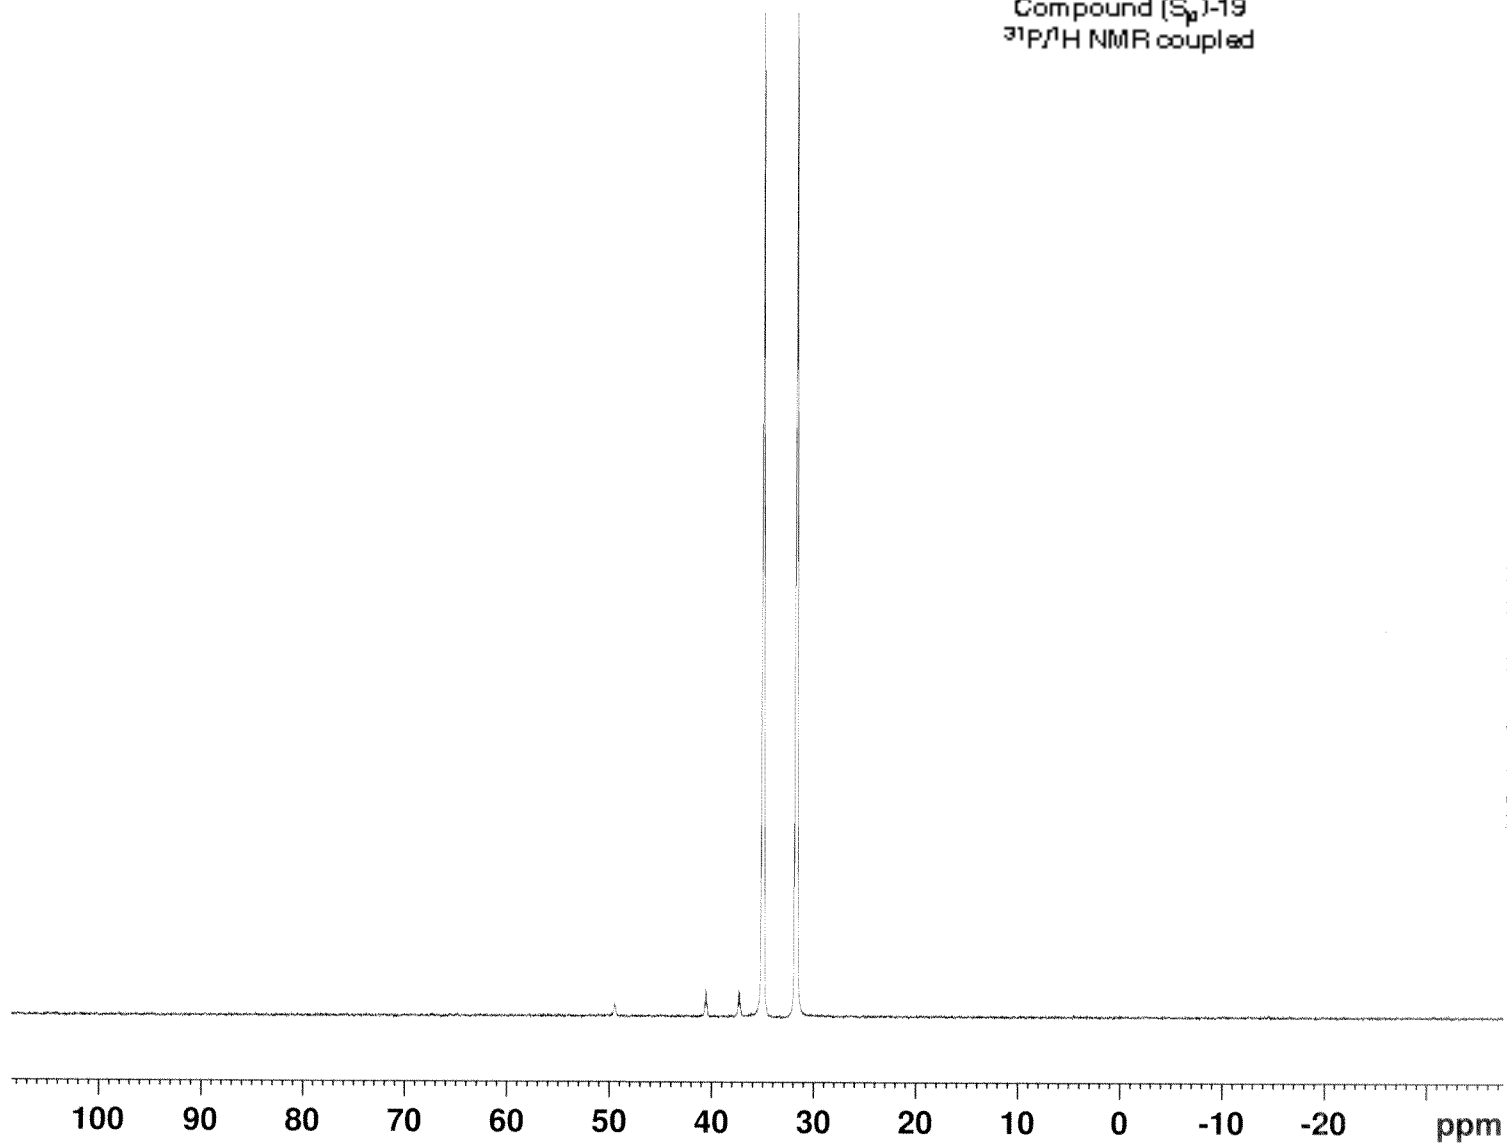

Current Data Parameters  
NAME OB 2095 after column  
EXPNO 2  
PROCNO 1

F2 - Acquisition Parameters  
Date\_ 20150630  
Time 9.40  
INSTRUM spect  
PROBHD 5 mm PABBO BB/  
PULPROG zg30  
TD 65536  
SOLVENT CDCl3  
NS 32  
DS 4  
SWH 64102.563 Hz  
FIDRES 0.978127 Hz  
AQ 0.5111808 sec  
RG 203.57  
DW 7.800 usec  
DE 6.50 usec  
TE 294.0 K  
D1 2.00000000 sec  
TD0 1

==== CHANNEL f1 =====  
SFO1 161.9674942 MHz  
NUC1 31P  
P1 14.25 usec  
PLW1 15.00000000 W

F2 - Processing parameters  
SI 32768  
SF 161.9755930 MHz  
WDW EM  
SSB 0  
LB 1.00 Hz  
GB 0  
PC 1.40

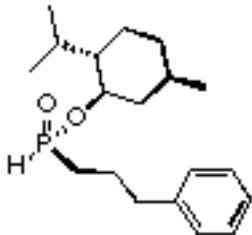

Compound (S<sub>p</sub>)-19  
<sup>1</sup>H NMR

Current Data Parameters  
 NAME OB 2095 after column  
 EXPNO 3  
 PROCNO 1

F2 - Acquisition Parameters  
 Date\_ 20150630  
 Time 9.42  
 INSTRUM spect  
 PROBHD 5 mm PABBO BB/  
 PULPROG zg30  
 TD 65536  
 SOLVENT CDC13  
 NS 16  
 DS 2  
 SWH 8012.820 Hz  
 FIDRES 0.122266 Hz  
 AQ 4.0894465 sec  
 RG 8.79  
 DW 62.400 usec  
 DE 6.50 usec  
 TE 293.9 K  
 D1 1.00000000 sec  
 TD0 1

===== CHANNEL f1 =====  
 SFO1 400.1324710 MHz  
 NUC1 1H  
 P1 10.00 usec  
 PLW1 25.00300026 W

F2 - Processing parameters  
 SI 65536  
 SF 400.130000 MHz  
 WDW EM  
 SSB 0  
 LB 0.30 Hz  
 GB 0  
 PC 1.00

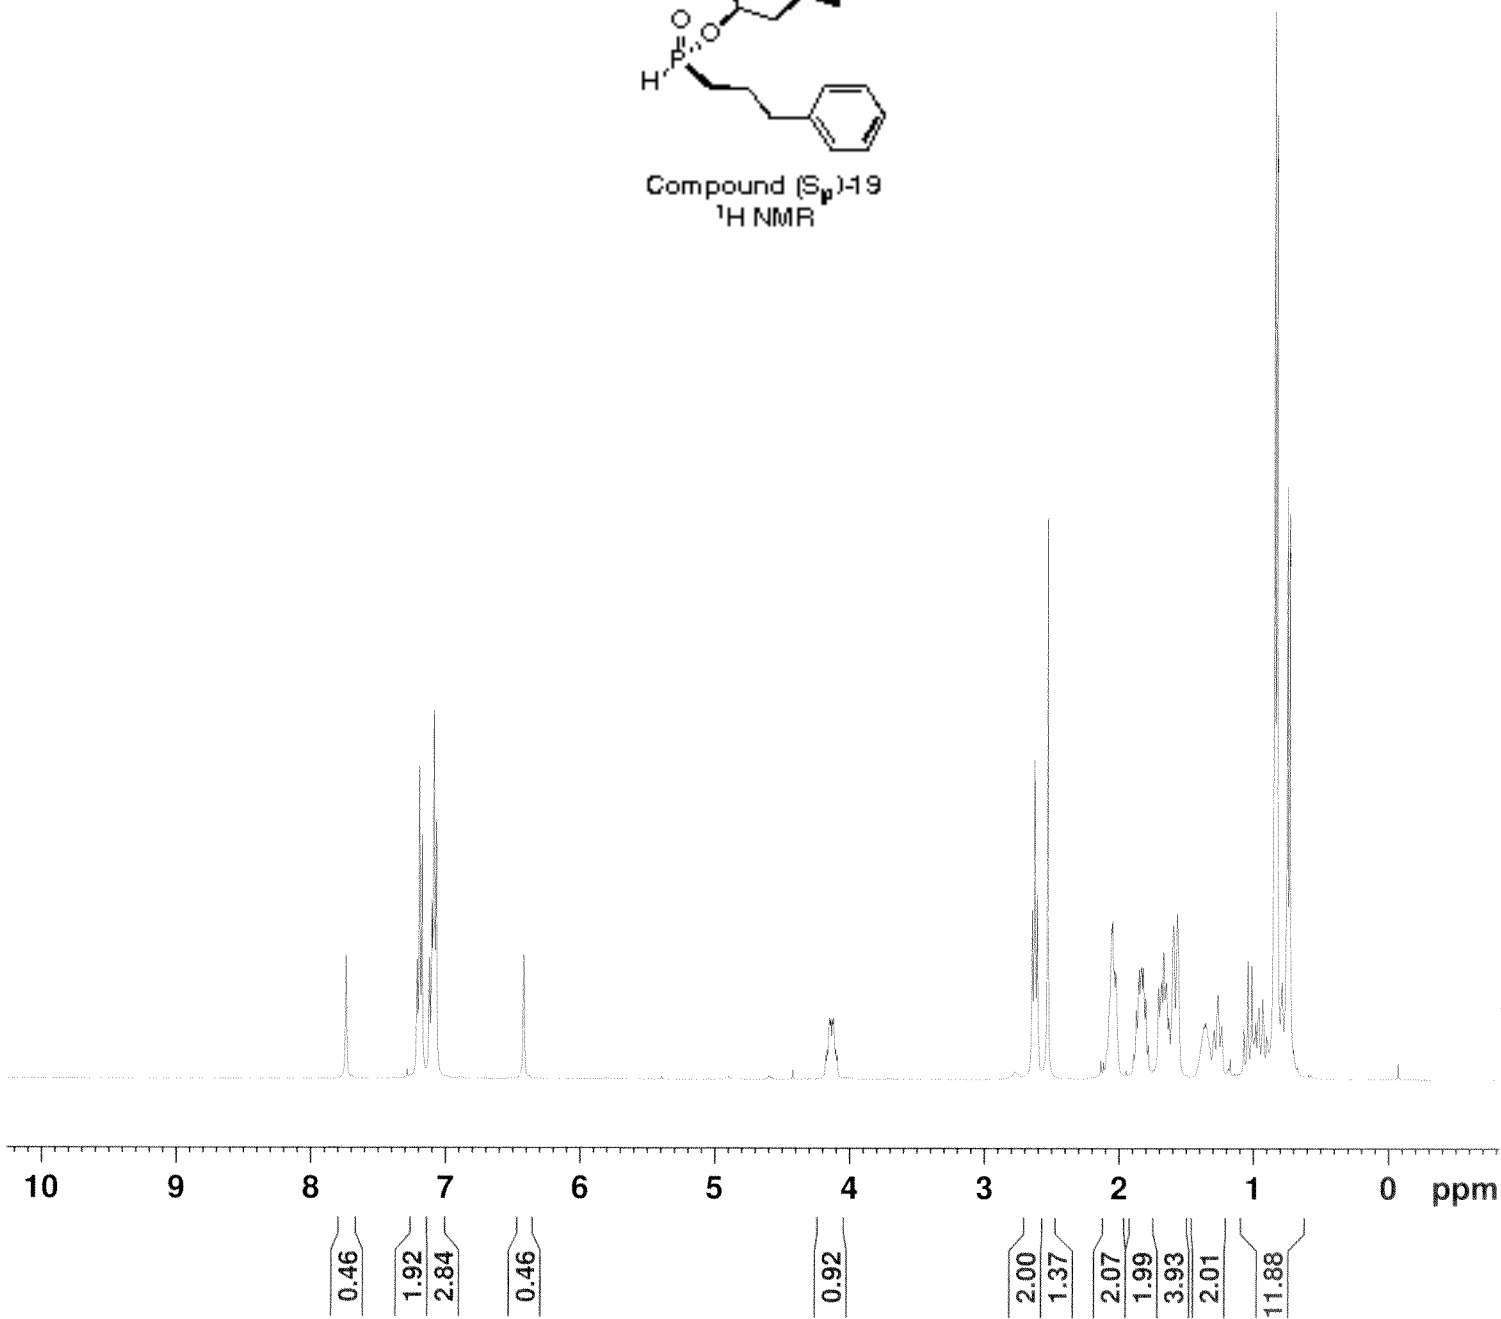

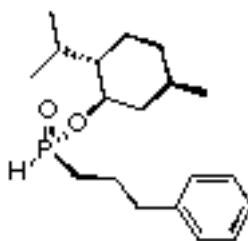

Compound (S<sub>p</sub>)-19  
<sup>13</sup>C NMR

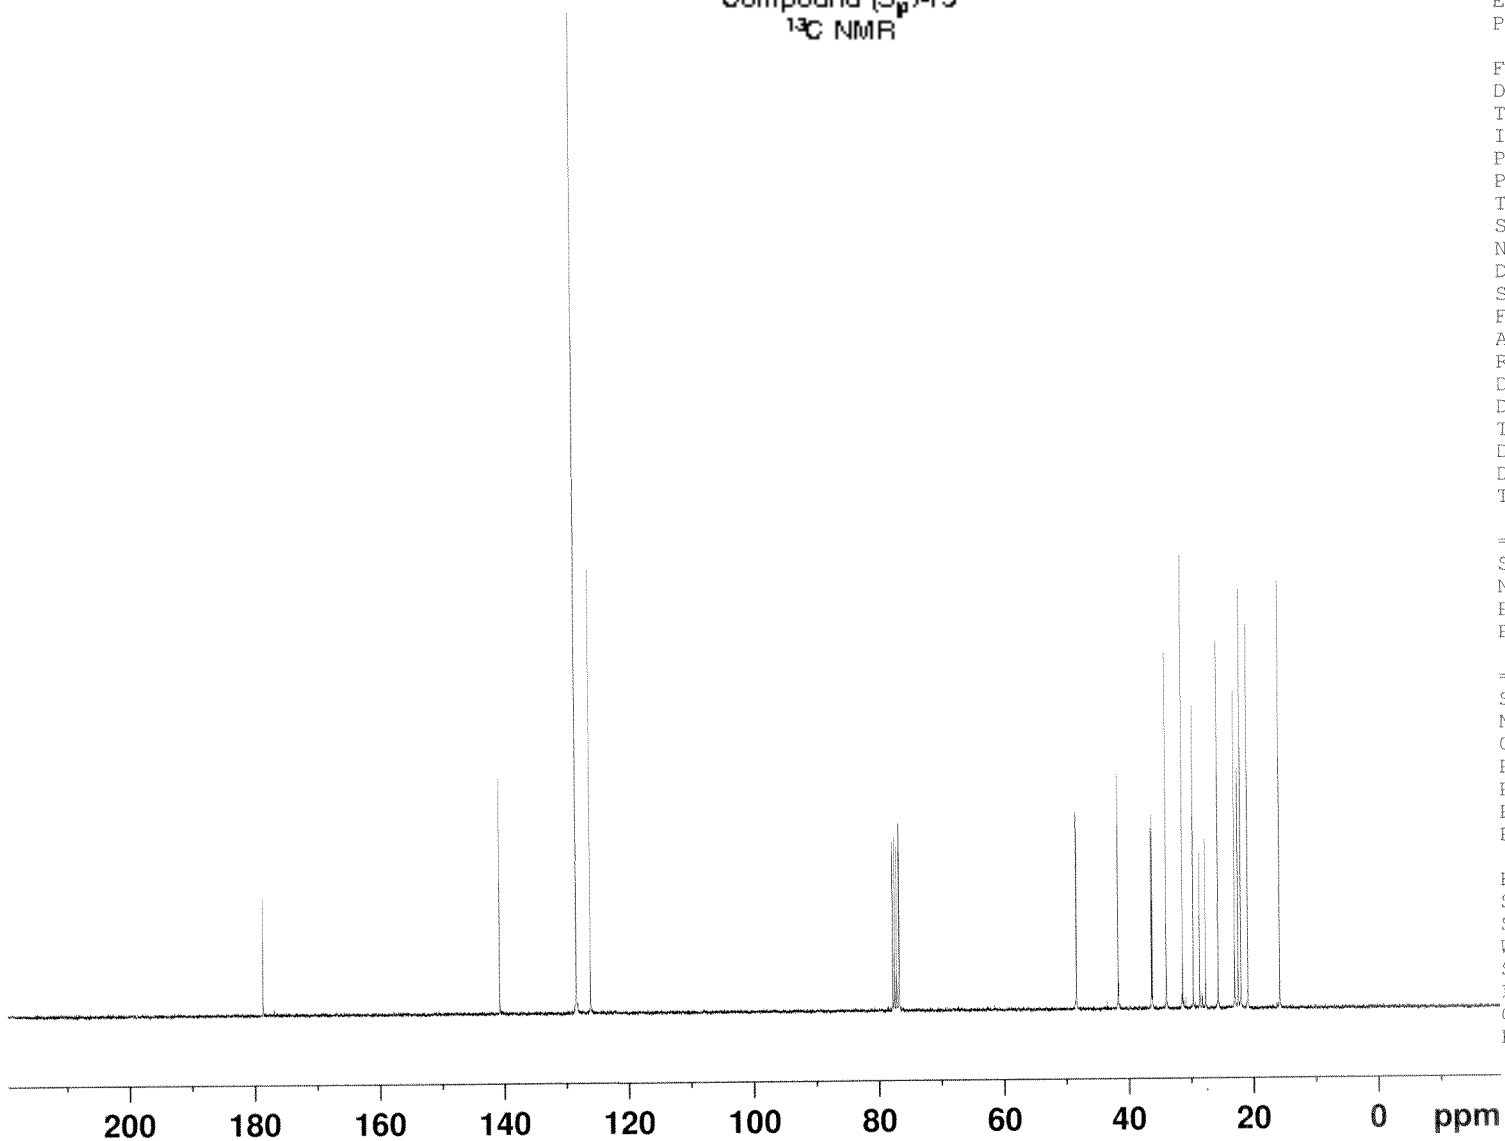

Current Data Parameters  
 NAME OB 2095 after column  
 EXPNO 4  
 PROCNO 1

F2 - Acquisition Parameters  
 Date\_ 20150630  
 Time 9.51  
 INSTRUM spect  
 PROBHD 5 mm PABBO BB/  
 PULPROG zgpg30  
 TD 65536  
 SOLVENT CDCl3  
 NS 101  
 DS 4  
 SWH 24038.461 Hz  
 FIDRES 0.366798 Hz  
 AQ 1.3631488 sec  
 RG 203.57  
 DW 20.800 usec  
 DE 6.50 usec  
 TE 295.0 K  
 D1 2.0000000 sec  
 D11 0.03000000 sec  
 TD0 1

==== CHANNEL f1 =====  
 SFO1 100.6228293 MHz  
 NUC1 13C  
 P1 10.00 usec  
 PLW1 45.00000000 W

==== CHANNEL f2 =====  
 SFO2 400.1316005 MHz  
 NUC2 1H  
 CPDPRG[2] waltz16  
 PCPD2 90.00 usec  
 PLW2 10.00000000 W  
 PLW12 0.31604999 W  
 PLW13 0.25600001 W

F2 - Processing parameters  
 SI 32768  
 SF 100.6127685 MHz  
 WDW EM  
 SSB 0  
 LB 1.00 Hz  
 GB 0  
 PC 1.40

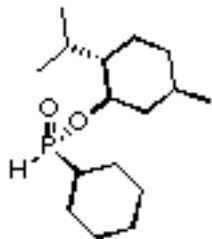

Compound (Sp)-20  
<sup>31</sup>P/<sup>1</sup>H NMR decoupled

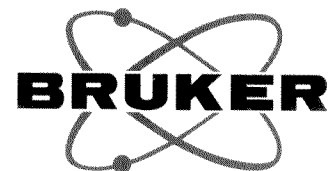

Current Data Parameters  
 NAME OB 1826 after column  
 EXPNO 1  
 PROCNO 1

F2 - Acquisition Parameters  
 Date\_ 20141112  
 Time\_ 9.44  
 INSTRUM spect  
 PROBHD 5 mm PABBO BB/  
 PULPROG zgpg30  
 TD 65536  
 SOLVENT CDCl3  
 NS 16  
 DS 4  
 SWH 64102.563 Hz  
 FIDRES 0.978127 Hz  
 AQ 0.5111808 sec  
 RG 203.57  
 DW 7.800 usec  
 DE 6.50 usec  
 TE 298.6 K  
 D1 2.00000000 sec  
 D11 0.03000000 sec  
 TD0 1

==== CHANNEL f1 =====  
 SFO1 161.9674942 MHz  
 NUC1 31P  
 P1 14.25 usec  
 PLW1 15.00000000 W

==== CHANNEL f2 =====  
 SFO2 400.1316005 MHz  
 NUC2 1H  
 CPDPRG[2] waltz16  
 PCPD2 90.00 usec  
 PLW2 10.00000000 W  
 PLW12 0.31604999 W  
 PLW13 0.25600001 W

F2 - Processing parameters  
 SI 32768  
 SF 161.9755930 MHz  
 WDW EM  
 SSB 0  
 LB 1.00 Hz  
 GB 0  
 PC 1.40

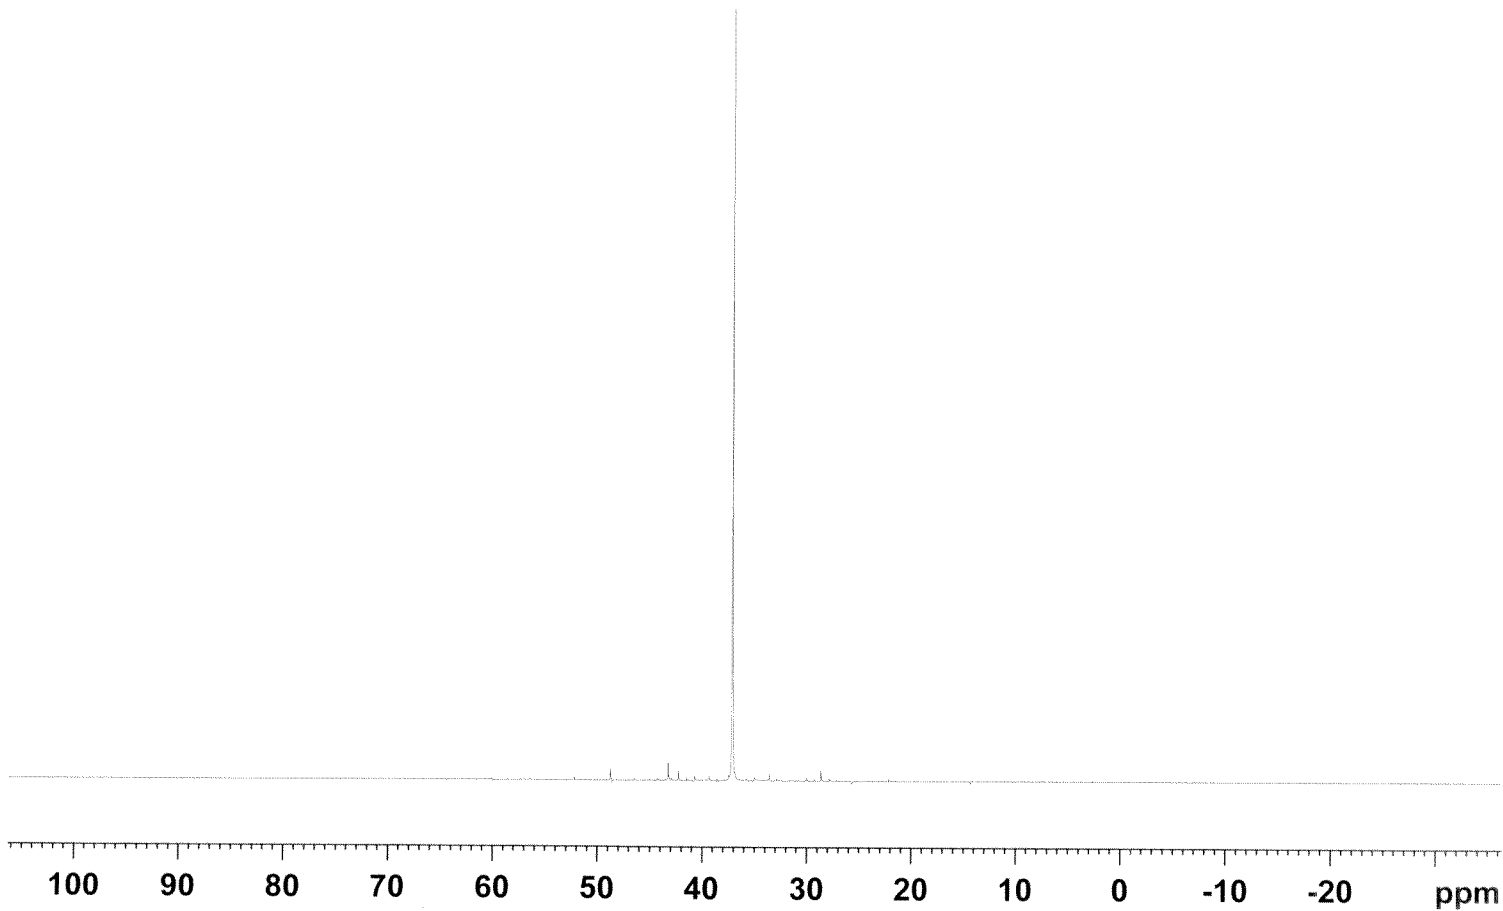

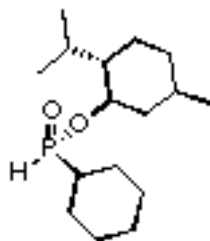

Compound (S<sub>p</sub>)-20  
<sup>31</sup>P/<sup>1</sup>H NMR coupled

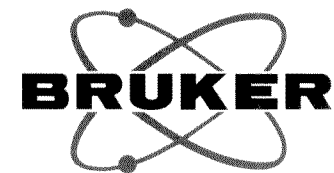

Current Data Parameters  
 NAME OB 1826 after column  
 EXPNO 2  
 PROCNO 1

F2 - Acquisition Parameters  
 Date\_ 20141112  
 Time 11.08  
 INSTRUM spect  
 PROBHD 5 mm PABBO BB/  
 PULPROG zg30  
 TD 65536  
 SOLVENT CDC13  
 NS 32  
 DS 4  
 SWH 64102.563 Hz  
 FIDRES 0.978127 Hz  
 AQ 0.5111808 sec  
 RG 203.57  
 DW 7.800 usec  
 DE 6.50 usec  
 TE 297.8 K  
 D1 2.00000000 sec  
 TDO 1

==== CHANNEL f1 =====  
 SFO1 161.9674942 MHz  
 NUC1 31P  
 P1 14.25 usec  
 PLW1 15.00000000 W

F2 - Processing parameters  
 SI 32768  
 SF 161.9755930 MHz  
 WDW EM  
 SSB 0  
 LB 1.00 Hz  
 GB 0  
 PC 1.40

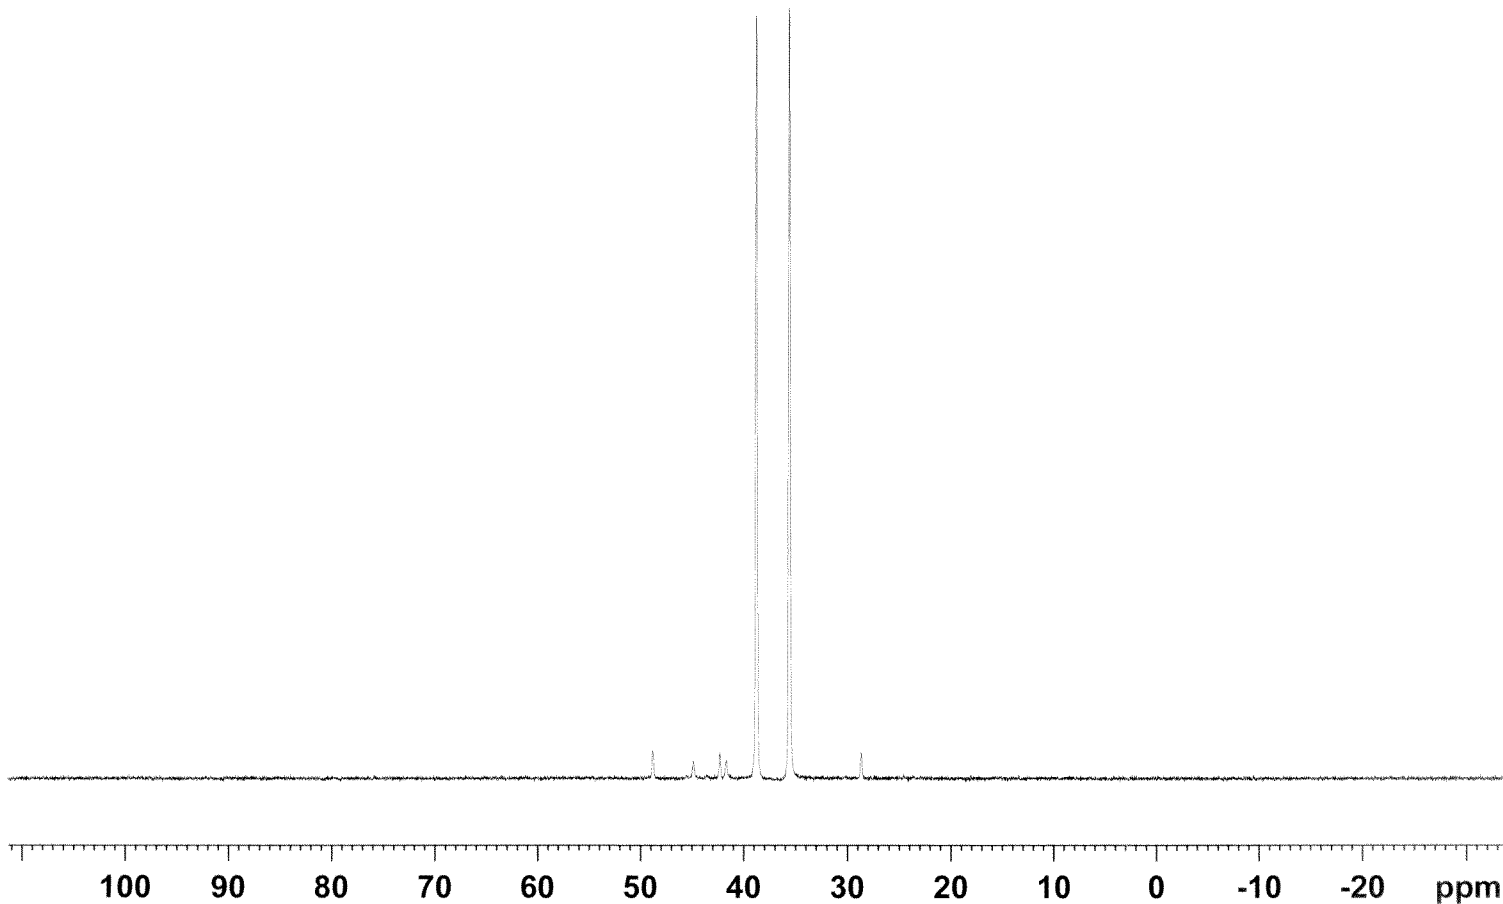

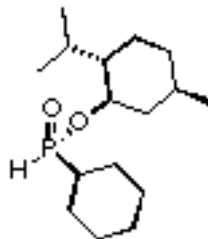

Compound (S<sub>p</sub>)-20  
<sup>1</sup>H NMR

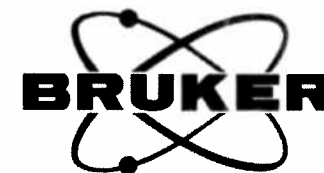

Current Data Parameters  
 NAME OB 1826 after column  
 EXPNO 3  
 PROCNO 1

F2 - Acquisition Parameters  
 Date\_ 20141112  
 Time\_ 11.10  
 INSTRUM spect  
 PROBHD 5 mm PABBO BB/  
 PULPROG zg30  
 TD 65536  
 SOLVENT CDC13  
 NS 8  
 DS 2  
 SWH 8012.820 Hz  
 FIDRES 0.122266 Hz  
 AQ 4.0894465 sec  
 RG 12.96  
 DW 62.400 usec  
 DE 6.50 usec  
 TE 297.8 K  
 D1 1.0000000 sec  
 TD0 1

==== CHANNEL f1 =====  
 SFO1 400.1324710 MHz  
 NUC1 1H  
 P1 10.00 usec  
 PLW1 25.00300026 W

F2 - Processing parameters  
 SI 65536  
 SF 400.1300000 MHz  
 WDW EM  
 SSB 0  
 LB 0.30 Hz  
 GB 0  
 PC 1.00

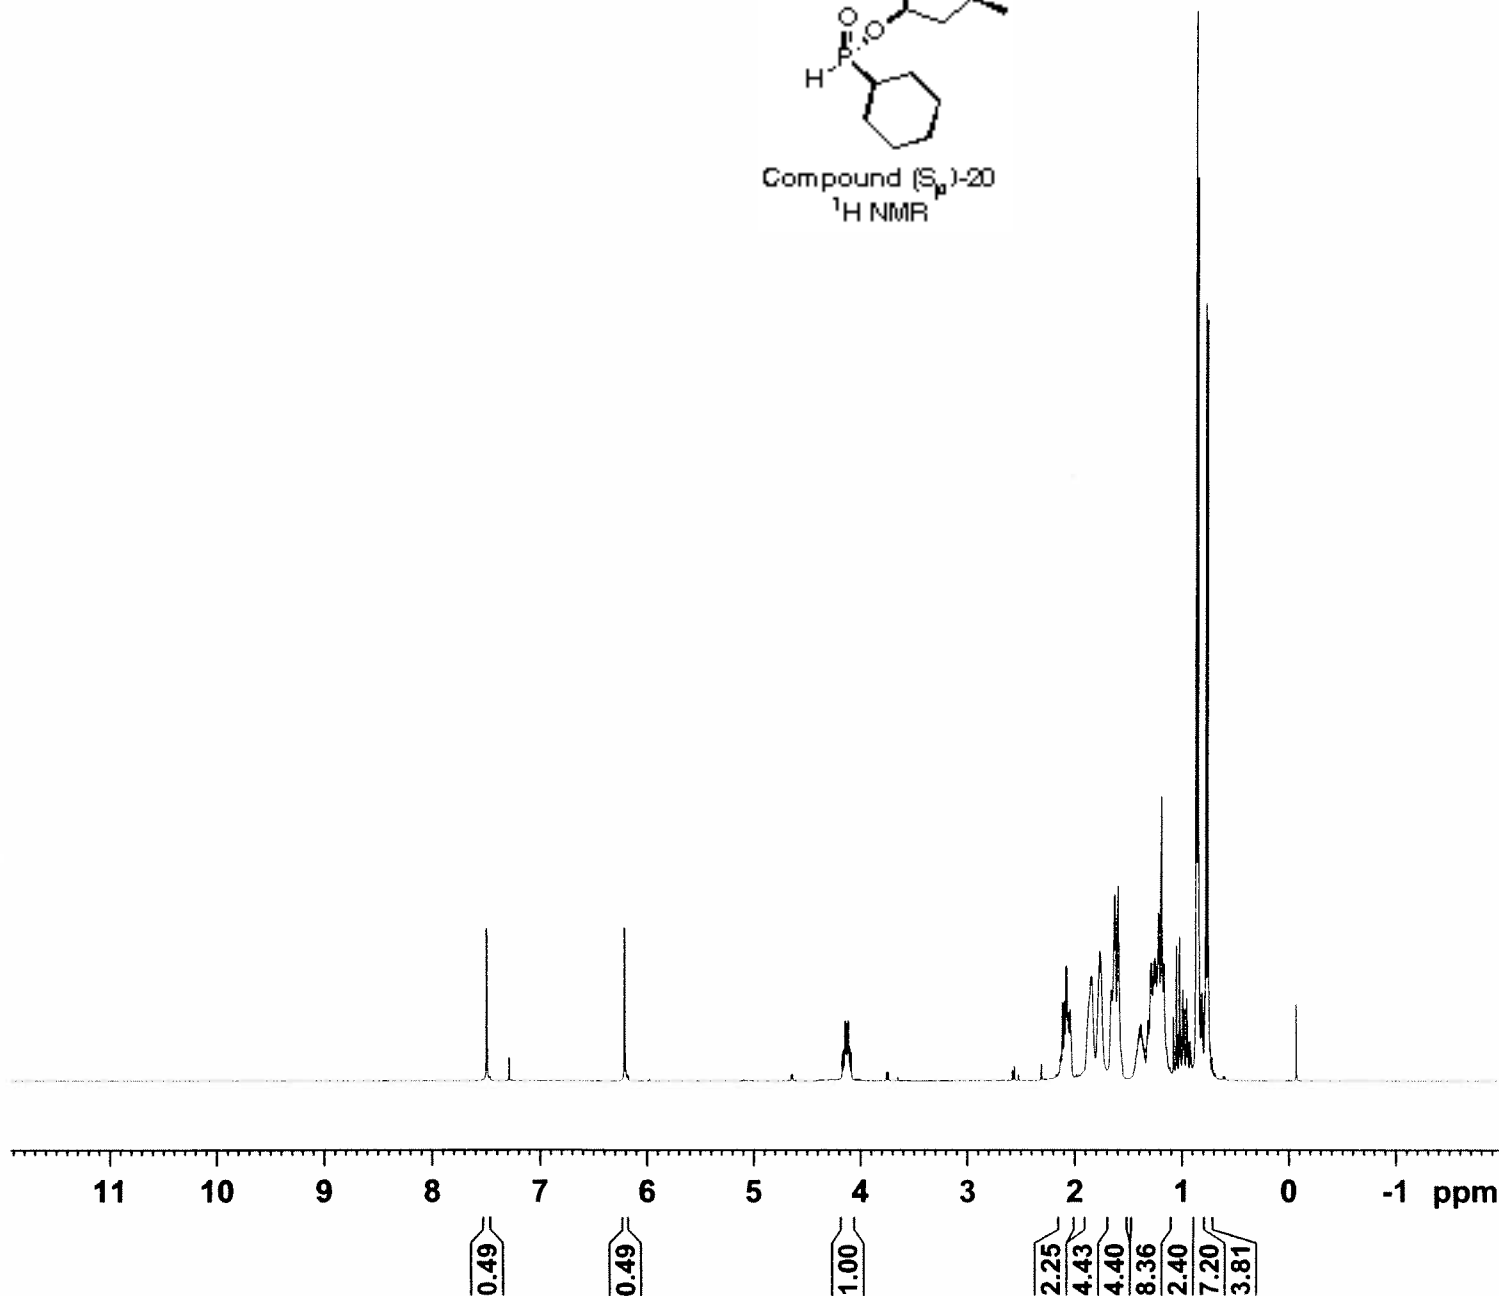



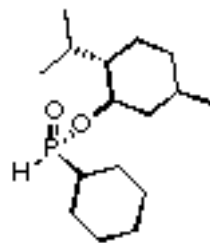

Compound (Sp)-20  
<sup>13</sup>C NMR

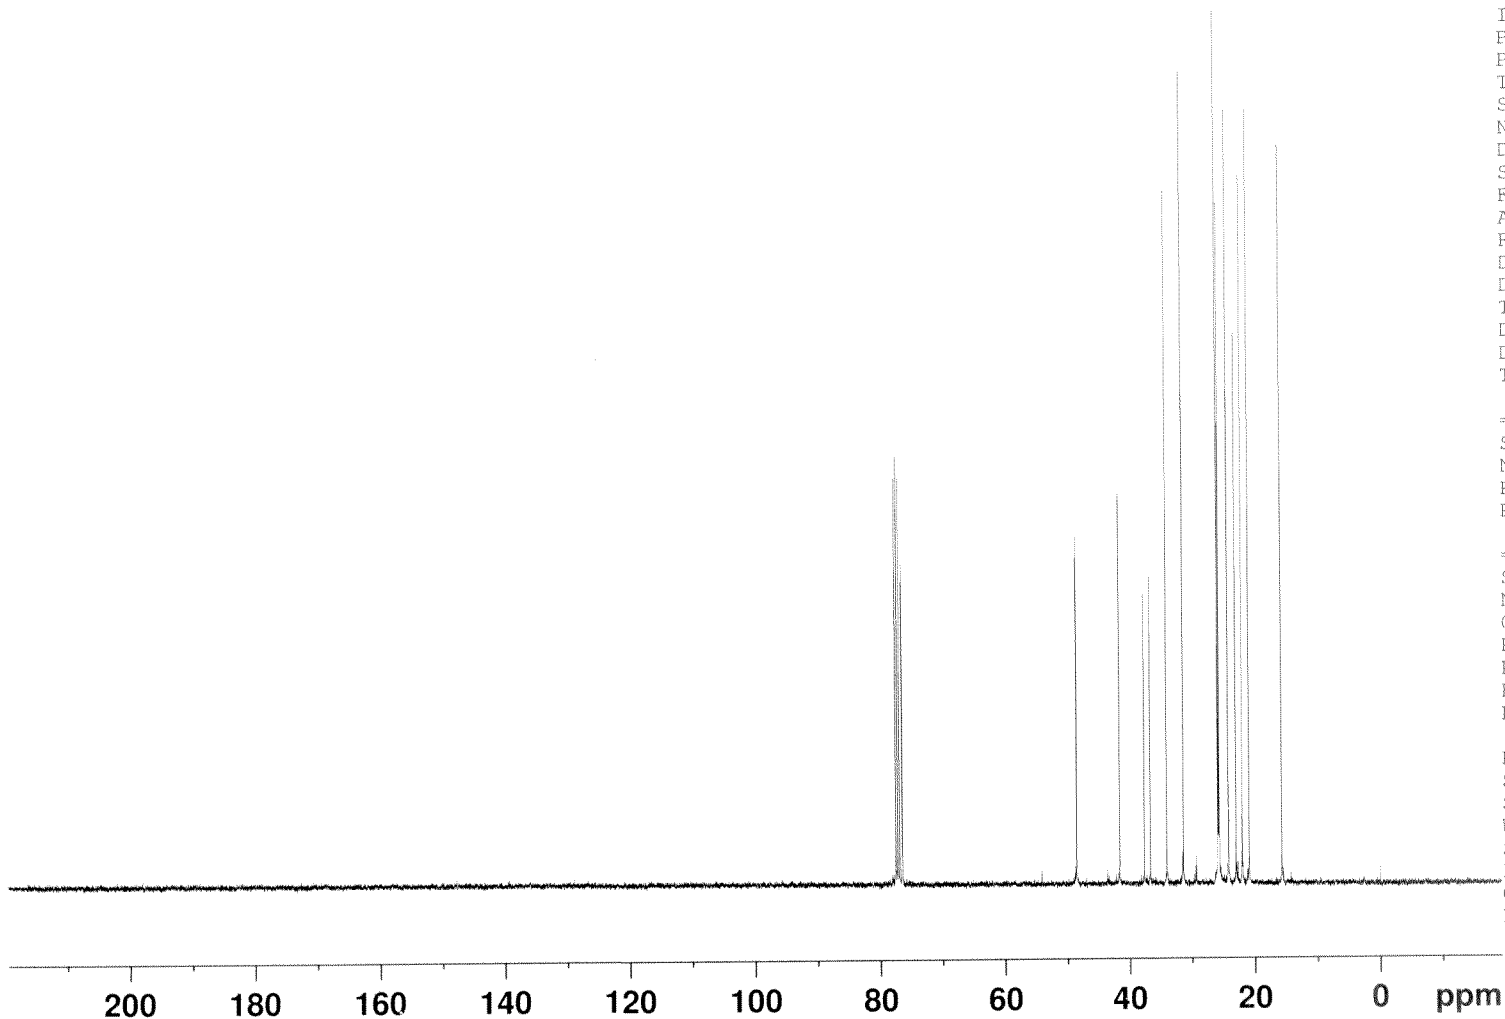

Current Data Parameters  
 NAME OB 1826 after column  
 EXPNO 4  
 PROCNO 1

F2 - Acquisition Parameters  
 Date\_ 20141112  
 Time 12.46  
 INSTRUM spect  
 PROBHD 5 mm PABBO BB/  
 PULPROG zgpg30  
 TD 65536  
 SOLVENT CDC13  
 NS 268  
 DS 4  
 SWH 24038.461 Hz  
 FIDRES 0.366798 Hz  
 AQ 1.3631488 sec  
 RG 203.57  
 DW 20.800 usec  
 DE 6.50 usec  
 TE 298.3 K  
 D1 2.00000000 sec  
 D11 0.03000000 sec  
 TD0 1

==== CHANNEL f1 =====  
 SFO1 100.6228293 MHz  
 NUC1 13C  
 P1 10.00 usec  
 PLW1 45.00000000 W

==== CHANNEL f2 =====  
 SFO2 400.1316005 MHz  
 NUC2 1H  
 CPDPRG[2] waltz16  
 PCPD2 90.00 usec  
 PLW2 10.00000000 W  
 PLW12 0.31604999 W  
 PLW13 0.25600001 W

F2 - Processing parameters  
 SI 32768  
 SF 100.6127685 MHz  
 WDW EM  
 SSB 0  
 LB 1.00 Hz  
 GB 0  
 PC 1.40

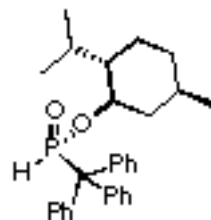

Compound (Sp)-21  
<sup>31</sup>P/<sup>1</sup>H NMR decoupled

Current Data Parameters  
 NAME OB 1843 after column  
 EXPNO 1  
 PROCNO 1

F2 - Acquisition Parameters  
 Date\_ 20141124  
 Time 17.38  
 INSTRUM spect  
 PROBHD 5 mm PABBO BB/  
 PULPROG zgpg30  
 TD 65536  
 SOLVENT CDC13  
 NS 16  
 DS 4  
 SWH 64102.563 Hz  
 FIDRES 0.978127 Hz  
 AQ 0.5111808 sec  
 RG 203.57  
 DW 7.800 usec  
 DE 6.50 usec  
 TE 296.1 K  
 D1 2.00000000 sec  
 D11 0.03000000 sec  
 TD0 1

==== CHANNEL f1 =====  
 SFO1 161.9674942 MHz  
 NUC1 31P  
 P1 14.25 usec  
 PLW1 15.00000000 W

==== CHANNEL f2 =====  
 SFO2 400.1316005 MHz  
 NUC2 1H  
 CPDPRG[2] waltz16  
 PCPD2 90.00 usec  
 PLW2 10.00000000 W  
 PLW12 0.31604999 W  
 PLW13 0.25600001 W

F2 - Processing parameters  
 SI 32768  
 SF 161.9755930 MHz  
 WDW EM  
 SSB 0  
 LB 1.00 Hz  
 GB 0  
 PC 1.40

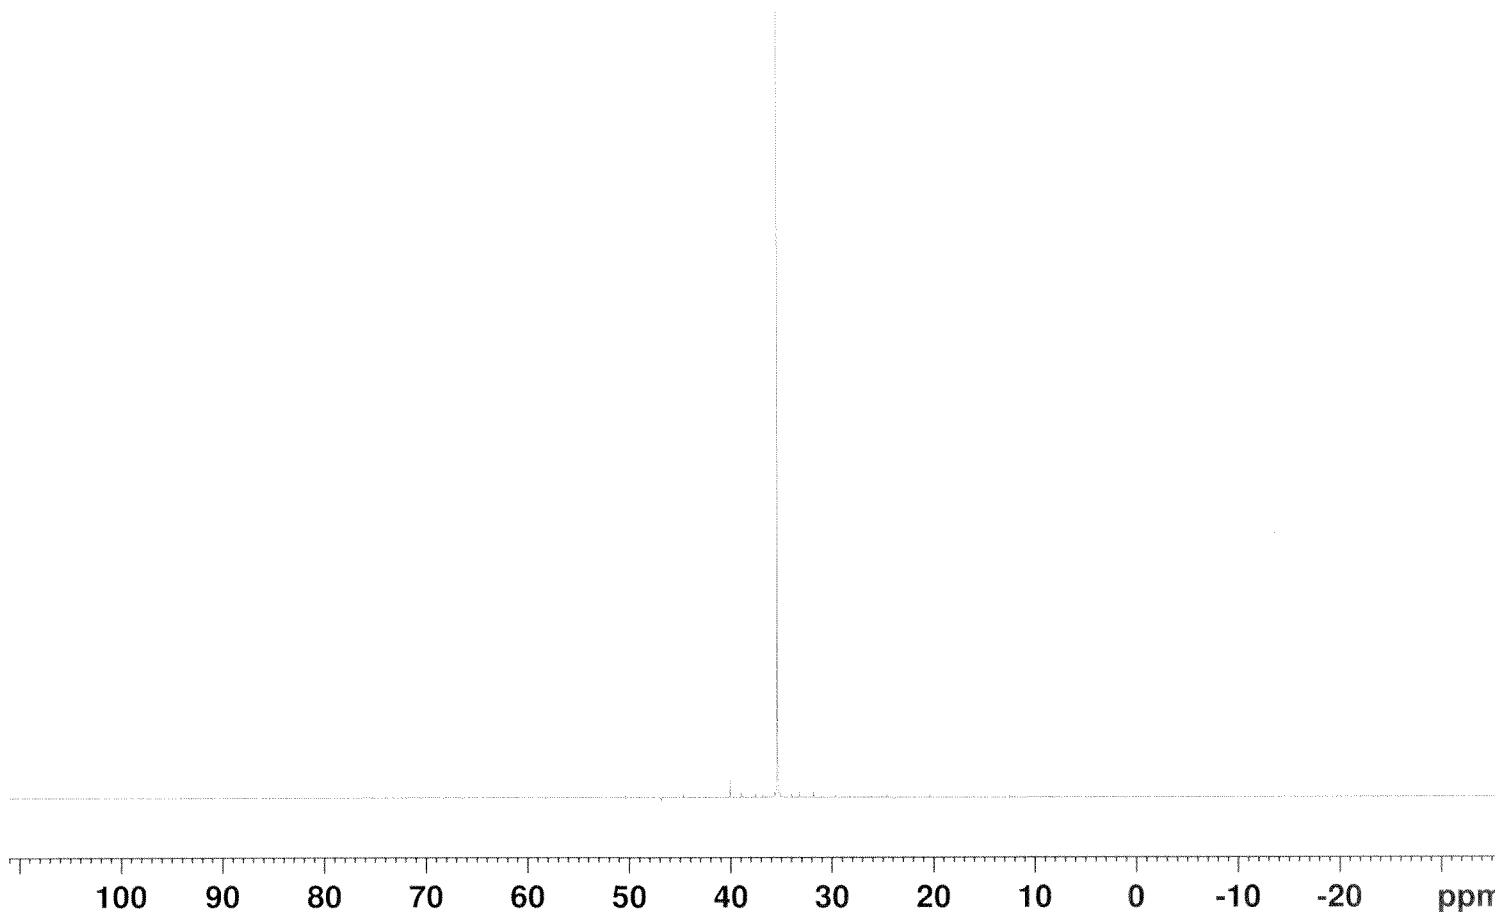

2.38  
 97.62

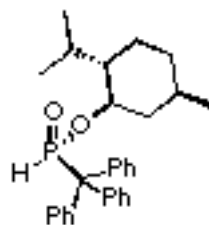

Compound (S<sub>p</sub>)-21  
<sup>31</sup>P/<sup>1</sup>H NMR coupled

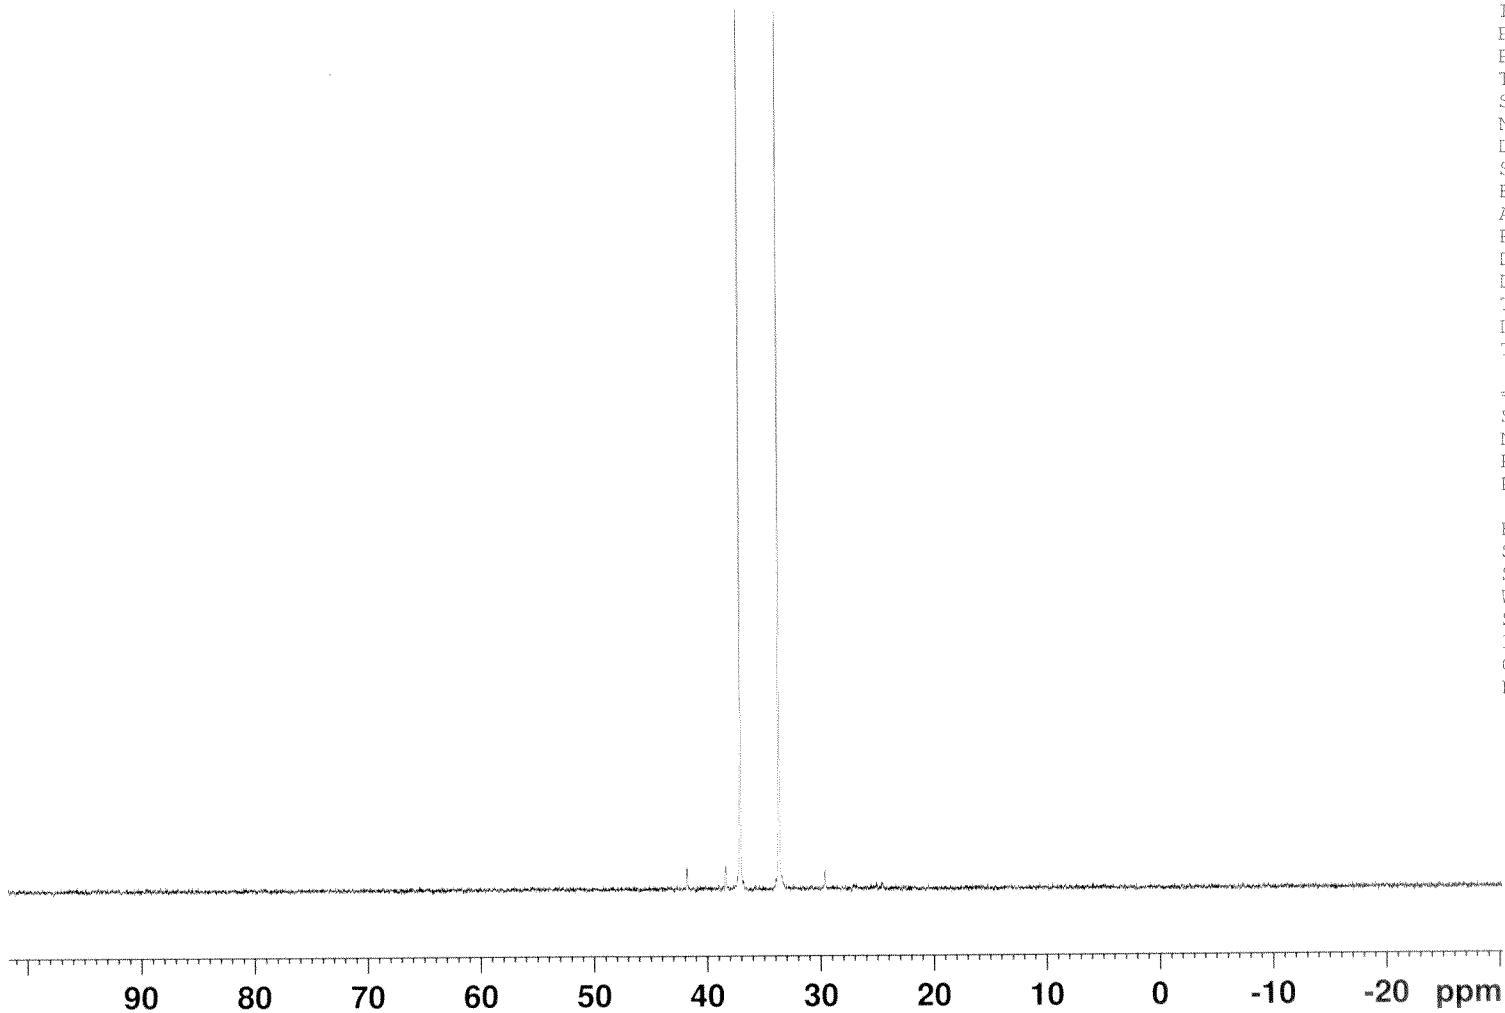

Current Data Parameters  
NAME OB 1843 after column  
EXPNO 2  
PROCNO 1

F2 - Acquisition Parameters  
Date\_ 20141124  
Time 17.40  
INSTRUM spect  
PROBHD 5 mm PABBO BB/  
PULPROG zg30  
TD 65536  
SOLVENT CDCl3  
NS 32  
DS 4  
SWH 64102.563 Hz  
FIDRES 0.978127 Hz  
AQ 0.5111808 sec  
RG 203.57  
DW 7.800 usec  
DE 6.50 usec  
TE 295.8 K  
D1 2.00000000 sec  
TD0 1

==== CHANNEL f1 =====  
SFO1 161.9674942 MHz  
NUC1 31P  
P1 14.25 usec  
PLW1 15.00000000 W

F2 - Processing parameters  
SI 32768  
SF 161.9755930 MHz  
WDW EM  
SSB 0  
LB 1.00 Hz  
GB 0  
PC 1.40

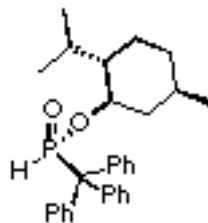

Compound (S<sub>p</sub>)-21  
<sup>1</sup>H NMR

Current Data Parameters  
 NAME OB 1843 after column  
 EXPNO 3  
 PROCNO 1

F2 - Acquisition Parameters  
 Date\_ 20141124  
 Time 17.42  
 INSTRUM spect  
 PROBHD 5 mm PABBO BB/  
 PULPROG zg30  
 TD 65536  
 SOLVENT CDCl3  
 NS 9  
 DS 2  
 SWH 8012.820 Hz  
 FIDRES 0.122266 Hz  
 AQ 4.0894465 sec  
 RG 32.38  
 DW 62.400 usec  
 DE 6.50 usec  
 TE 295.8 K  
 D1 1.00000000 sec  
 TD0 1

==== CHANNEL f1 =====  
 SFO1 400.1324710 MHz  
 NUC1 1H  
 P1 10.00 usec  
 PLW1 25.00300026 W

F2 - Processing parameters  
 SI 65536  
 SF 400.1300000 MHz  
 WDW EM  
 SSB 0  
 LB 0.30 Hz  
 GB 0  
 PC 1.00

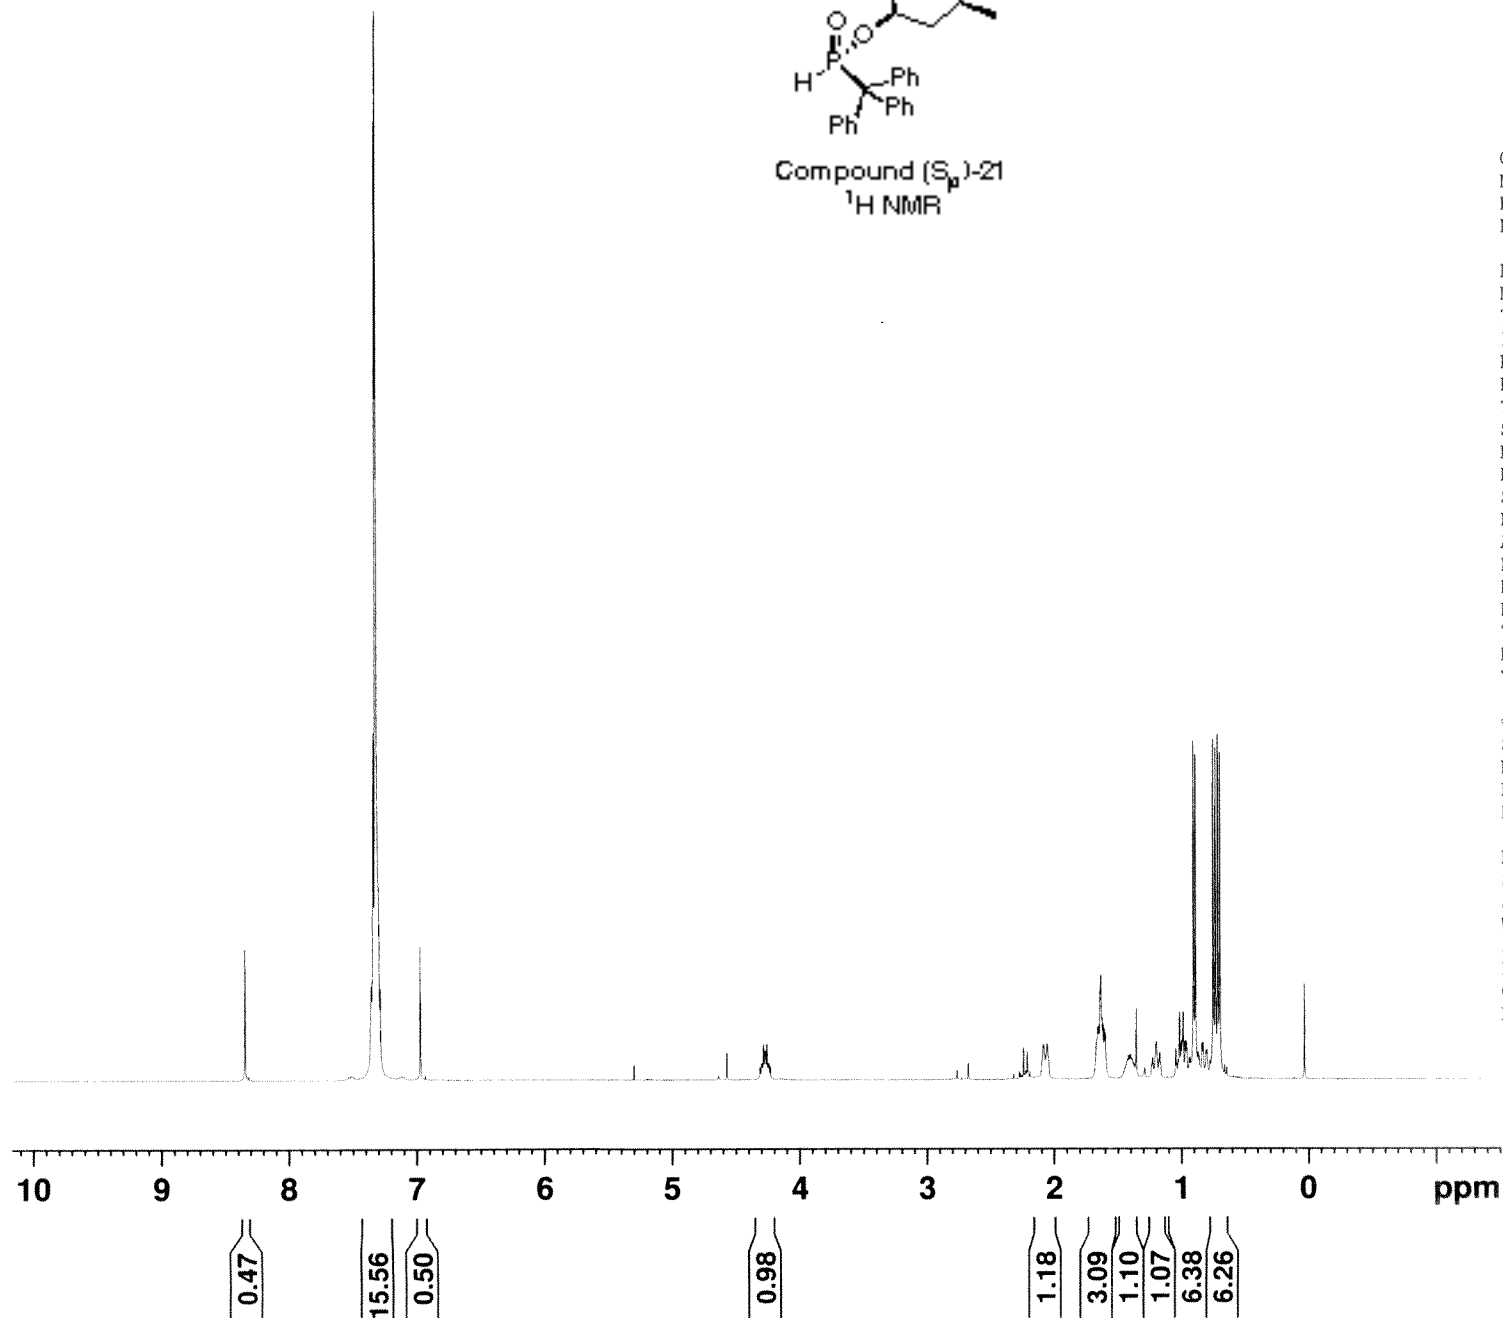

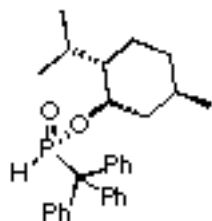

Compound (S<sub>P</sub>)-21  
<sup>13</sup>C NMR

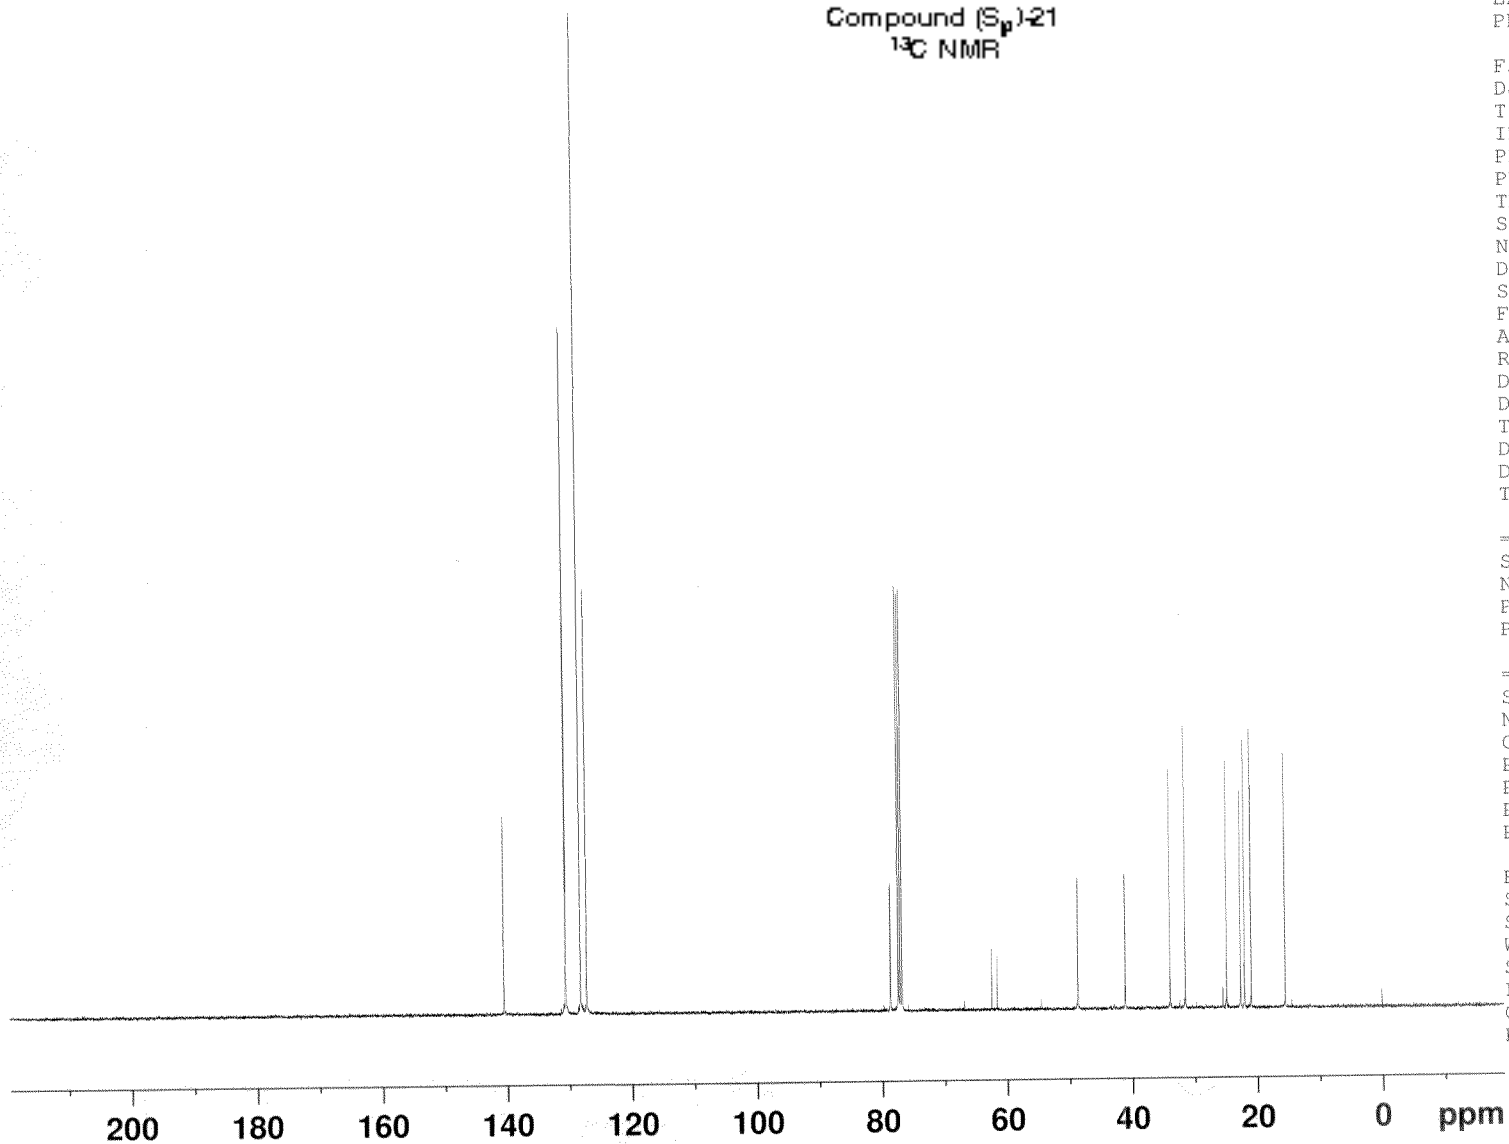

Current Data Parameters  
 NAME OB 1843 after column  
 EXPNO 4  
 PROCNO 1

F2 - Acquisition Parameters  
 Date\_ 20141124  
 Time 18.31  
 INSTRUM spect  
 PROBHD 5 mm PABBO BB/  
 PULPROG zgpg30  
 TD 65536  
 SOLVENT CDC13  
 NS 819  
 DS 4  
 SWH 24038.461 Hz  
 FIDRES 0.366798 Hz  
 AQ 1.3631488 sec  
 RG 203.57  
 DW 20.800 usec  
 DE 6.50 usec  
 TE 296.7 K  
 D1 2.00000000 sec  
 D11 0.03000000 sec  
 TDO 1

==== CHANNEL f1 =====  
 SFO1 100.6228293 MHz  
 NUC1 13C  
 P1 10.00 usec  
 PLW1 45.00000000 W

==== CHANNEL f2 =====  
 SFO2 400.1316005 MHz  
 NUC2 1H  
 CPDPRG[2 waltz16  
 PCPD2 90.00 usec  
 PLW2 10.00000000 W  
 PLW12 0.31604999 W  
 PLW13 0.25600001 W

F2 - Processing parameters  
 SI 32768  
 SF 100.6127685 MHz  
 WDW EM  
 SSB 0  
 LB 1.00 Hz  
 GB 0  
 PC 1.40

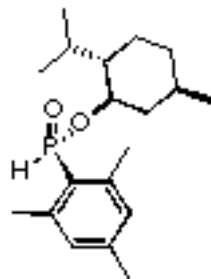

Compound (Sp)-22  
<sup>31</sup>P/<sup>1</sup>H NMR decoupled

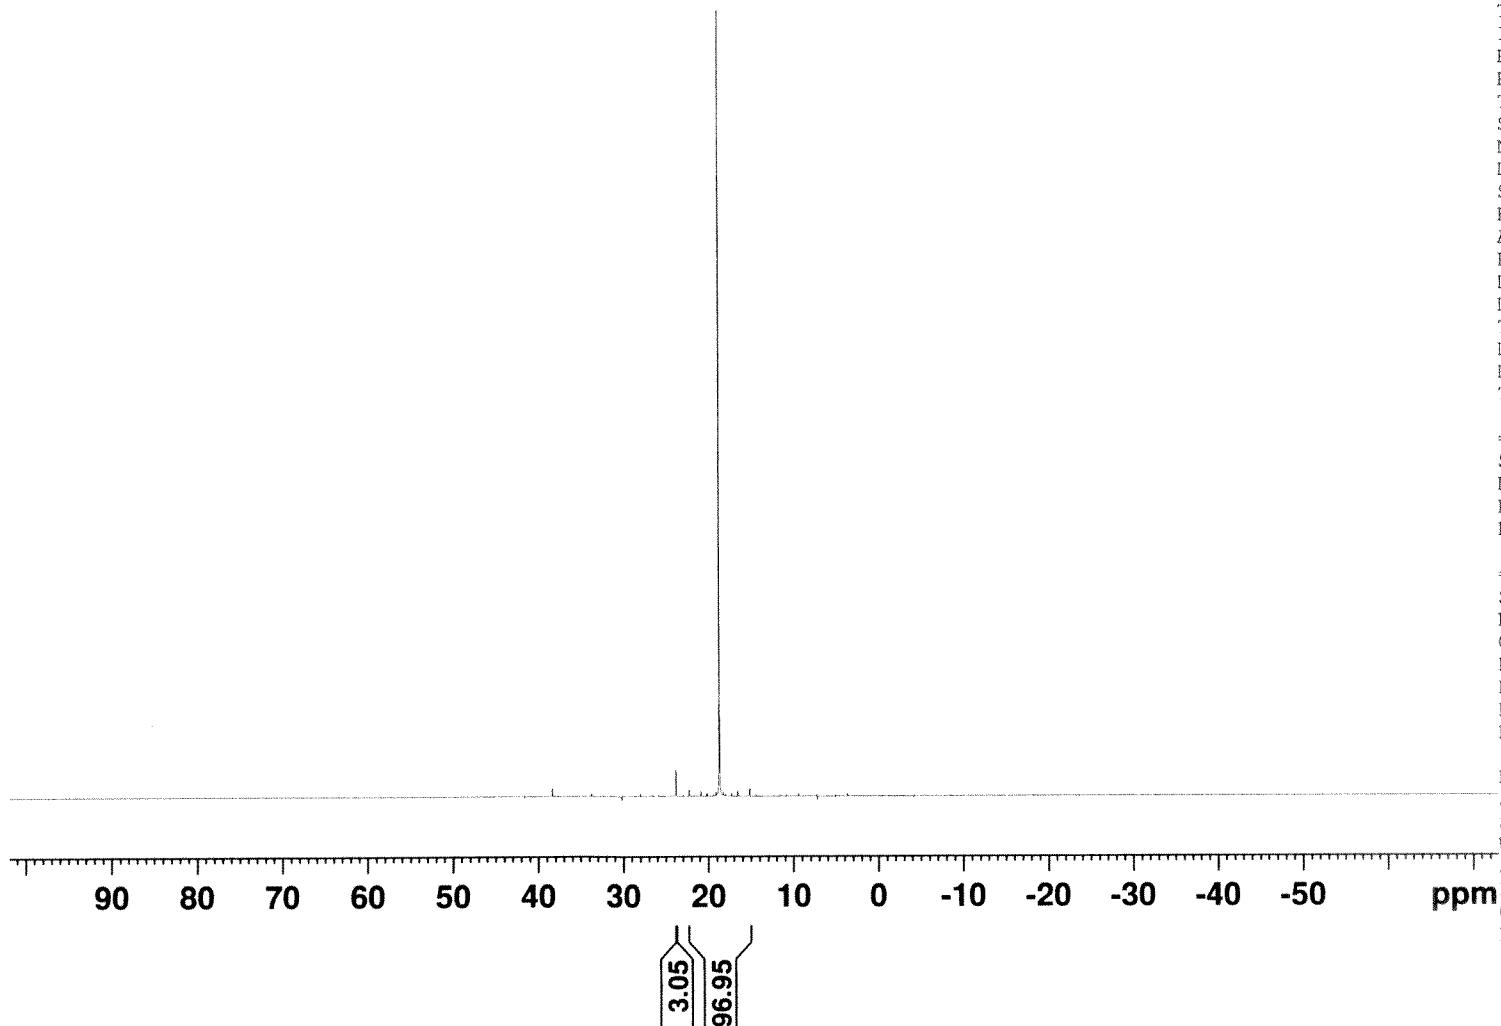

Current Data Parameters  
 NAME OB 1866 after column  
 EXPNO 1  
 PROCNO 1

F2 - Acquisition Parameters  
 Date\_ 20141210  
 Time 8.57  
 INSTRUM spect  
 PROBHD 5 mm PABBO BB/  
 PULPROG zgpg30  
 TD 65536  
 SOLVENT CDC13  
 NS 16  
 DS 4  
 SWH 64102.563 Hz  
 FIDRES 0.978127 Hz  
 AQ 0.5111808 sec  
 RG 203.57  
 DW 7.800 usec  
 DE 6.50 usec  
 TE 299.0 K  
 D1 2.00000000 sec  
 D11 0.03000000 sec  
 TD0 1

==== CHANNEL f1 =====  
 SFO1 161.9674942 MHz  
 NUC1 31P  
 P1 14.25 usec  
 PLW1 15.00000000 W

==== CHANNEL f2 =====  
 SFO2 400.1316005 MHz  
 NUC2 1H  
 CPDPRG[2] waltz16  
 PCPD2 90.00 usec  
 PLW2 10.00000000 W  
 PLW12 0.31604999 W  
 PLW13 0.25600001 W

F2 - Processing parameters  
 SI 32768  
 SF 161.9755930 MHz  
 WDW EM  
 SSB 0  
 LB 1.00 Hz  
 GB 0  
 PC 1.40

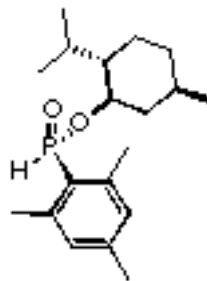

Compound (S<sub>p</sub>)-22  
<sup>31</sup>P/<sup>1</sup>H NMR coupled

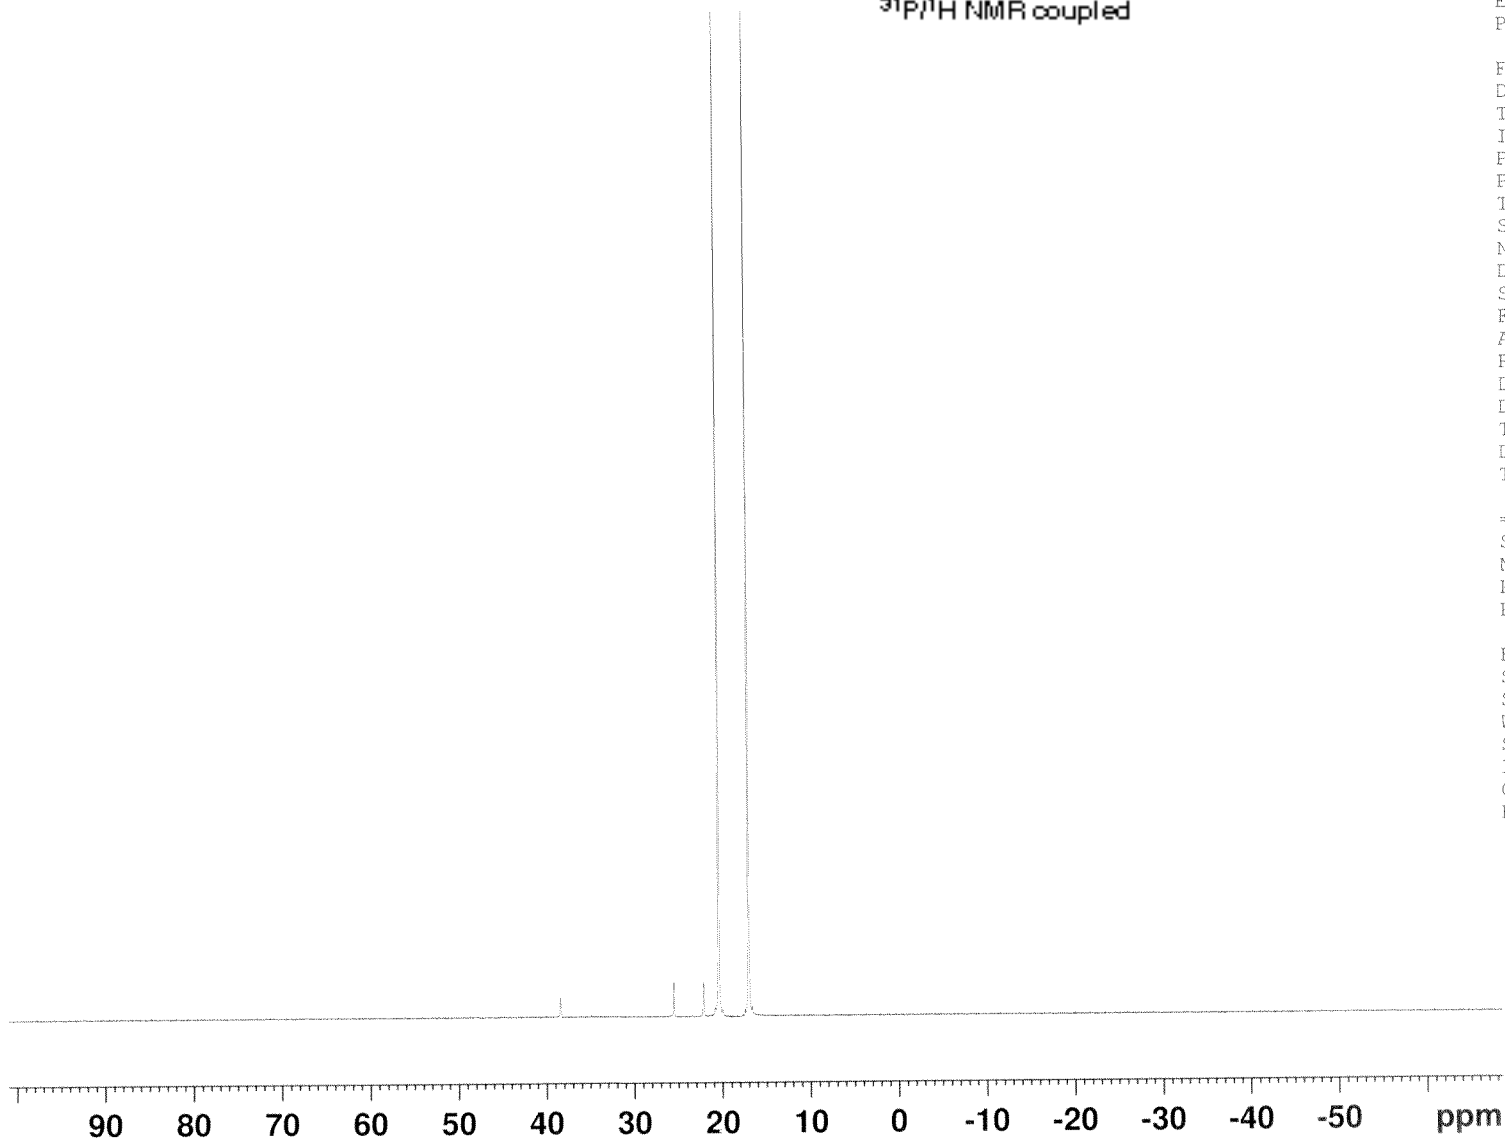

Current Data Parameters  
NAME OB 1866 after column  
EXPNO 2  
PROCNO 1

F2 - Acquisition Parameters  
Date\_ 20141210  
Time 8.59  
INSTRUM spect  
PROBHD 5 mm PABBO BB/  
PULPROG zg30  
TD 65536  
SOLVENT CDC13  
NS 32  
DS 4  
SWH 64102.563 Hz  
FIDRES 0.978127 Hz  
AQ 0.5111808 sec  
RG 203.57  
DW 7.800 usec  
DE 6.50 usec  
TE 298.6 K  
D1 2.00000000 sec  
TD0 1

==== CHANNEL f1 =====  
SF01 161.9674942 MHz  
NUC1 31P  
P1 14.25 usec  
PLW1 15.00000000 W

F2 - Processing parameters  
SI 32768  
SF 161.9755930 MHz  
WDW EM  
SSB 0  
LB 1.00 Hz  
GB 0  
PC 1.40

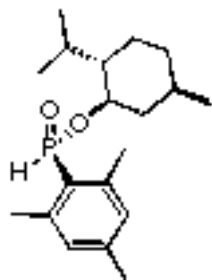

Compound (S<sub>R</sub>)-22  
<sup>1</sup>H NMR

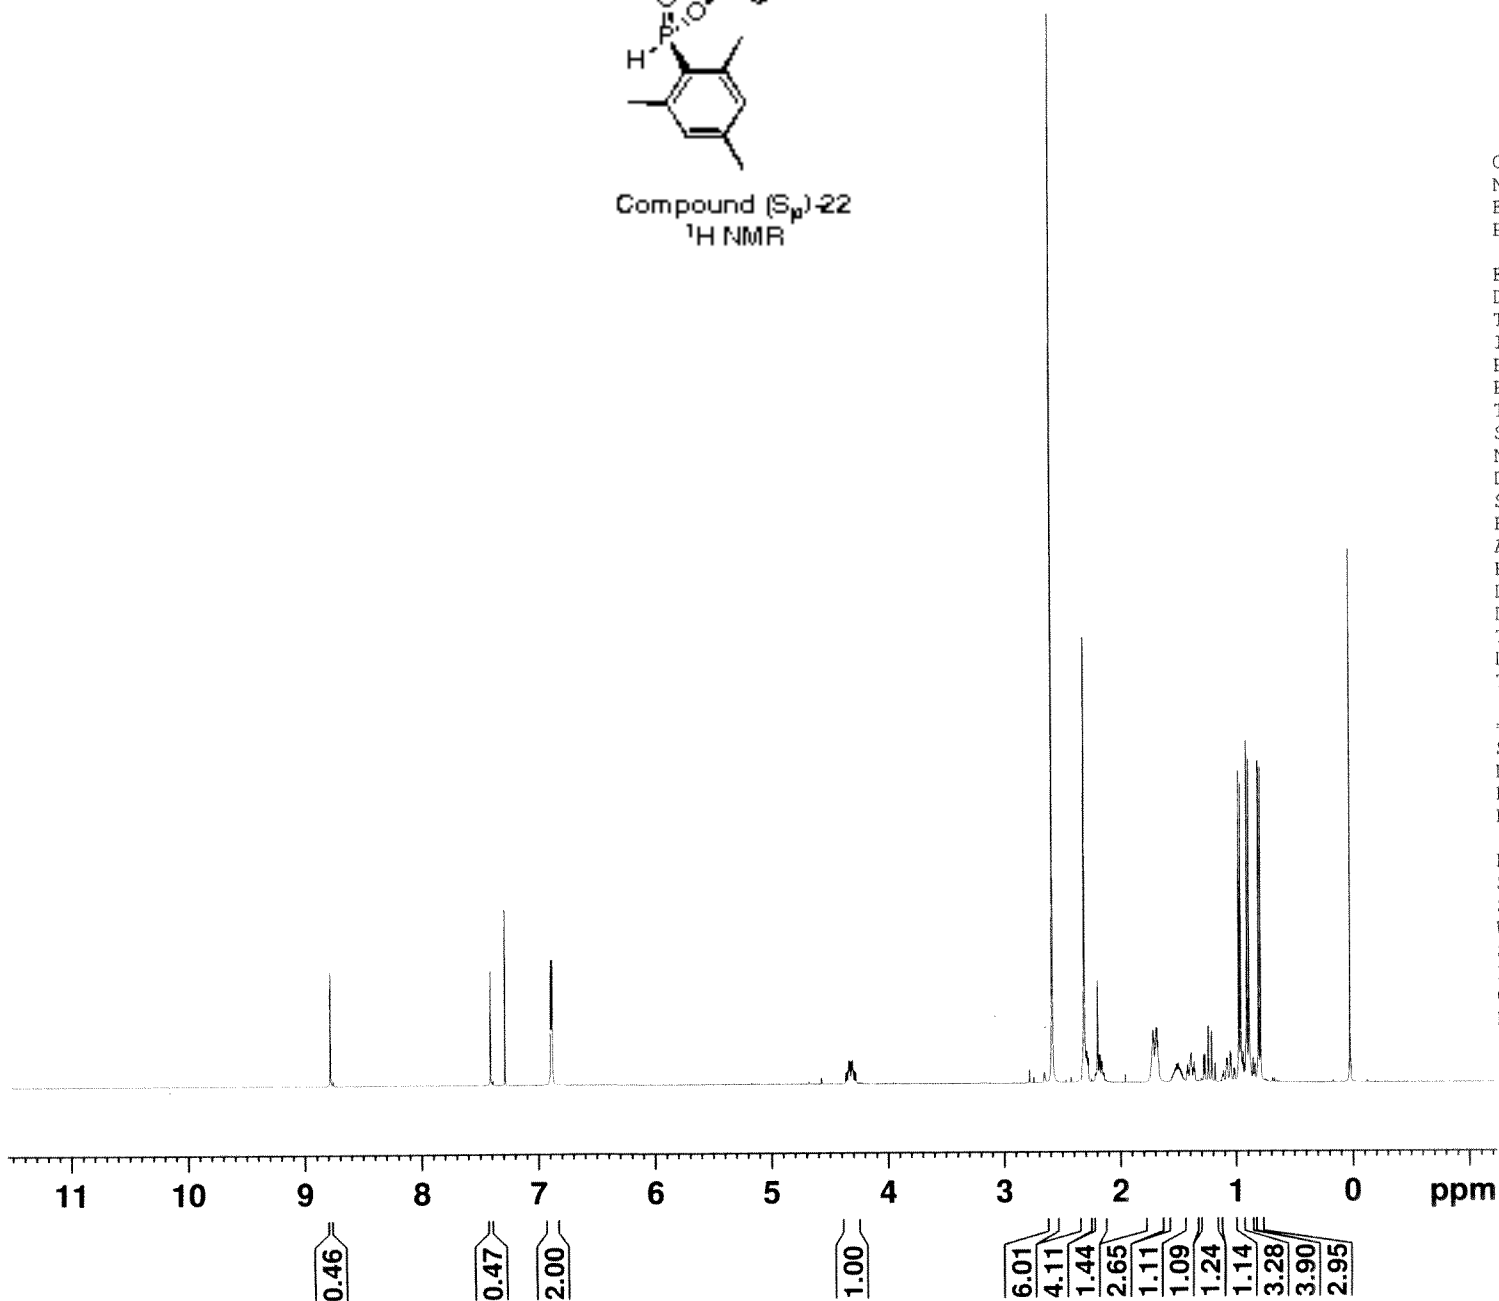

Current Data Parameters  
 NAME OB 1866 after column  
 EXPNO 3  
 PROCNO 1

F2 - Acquisition Parameters  
 Date\_ 20141210  
 Time 8.50  
 INSTRUM spect  
 PROBHD 5 mm PABBO BB/  
 PULPROG zg30  
 TD 65536  
 SOLVENT CDC13  
 NS 12  
 DS 2  
 SWH 8012.820 Hz  
 FIDRES 0.122266 Hz  
 AQ 4.0894465 sec  
 RG 113.32  
 DW 62.400 usec  
 DE 6.50 usec  
 TE 298.5 K  
 D1 1.00000000 sec  
 TD0 1

===== CHANNEL f1 =====  
 SFO1 400.1324710 MHz  
 NUC1 1H  
 P1 10.00 usec  
 PLW1 25.00300026 W

F2 - Processing parameters  
 SI 65536  
 SF 400.1300000 MHz  
 WDW EM  
 SSB 0  
 LB 0.30 Hz  
 GB 0  
 PC 1.00



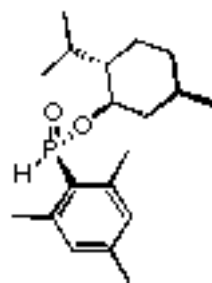

Compound (S<sub>R</sub>)-22  
<sup>13</sup>C NMR

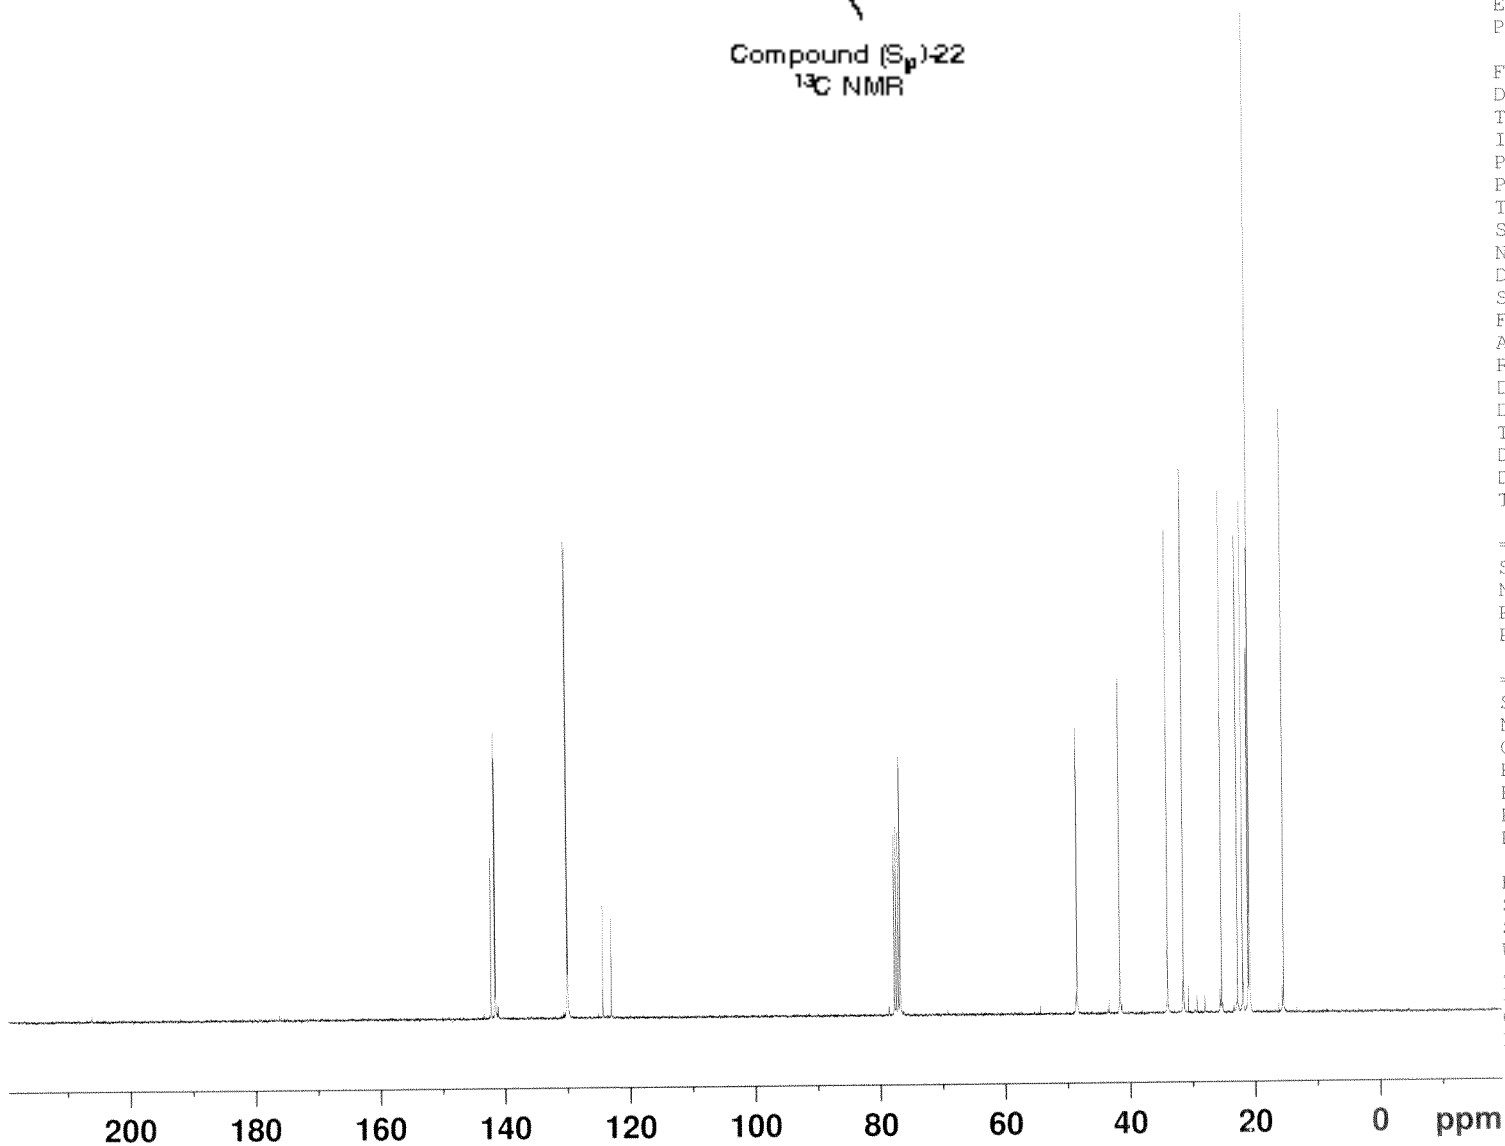

Current Data Parameters  
 NAME OB 1866 after column  
 EXPNO 4  
 PROCNO 1

F2 - Acquisition Parameters  
 Date\_ 20141210  
 Time 9.17  
 INSTRUM spect  
 PROBHD 5 mm PABBO BB/  
 PULPROG zgpg30  
 TD 65536  
 SOLVENT CDC13  
 NS 282  
 DS 4  
 SWH 24038.461 Hz  
 FIDRES 0.366798 Hz  
 AQ 1.3631488 sec  
 RG 203.57  
 DW 20.800 usec  
 DE 6.50 usec  
 TE 299.8 K  
 D1 2.0000000 sec  
 D11 0.03000000 sec  
 TD0 1

==== CHANNEL f1 =====  
 SFO1 100.6228293 MHz  
 NUC1 13C  
 P1 10.00 usec  
 PLW1 45.00000000 W

==== CHANNEL f2 =====  
 SFO2 400.1316005 MHz  
 NUC2 1H  
 CPDPRG[2] waltz16  
 PCPD2 90.00 usec  
 PLW2 10.00000000 W  
 PLW12 0.31604999 W  
 PLW13 0.25600001 W

F2 - Processing parameters  
 SI 32768  
 SF 100.6127685 MHz  
 WDW EM  
 SSB 0  
 LB 1.00 Hz  
 GB 0  
 PC 1.40

OB 396

exp1 Phosphorus

```

SAMPLE
date Apr 25 2012 temp not used
solvent D2O gain 20
file /home/TCUser~/spin 20
/vnmrsys/data/auto~/hst 0.008
_2012.04.23/s_2012~/pw90 18.300
0425_05/data/D20_0~/alfa 10.000
2.fTd
ACQUISITION
sw 15797.8 il n
at 1.600 in n
np 50552 dp y
fb 8800 hs ny
bs 64 lb 1.00
d1 1.000 fn not used
nt 16
ct 16 sp -3647.3
TRANSMITTER
tn P31 rfl 15797.3
sfrq 121.465 rfp 3647.8
tof 7421.1 rpp 0
tpwr 55 lp 56.4
pw 9.150 lp -113.7
DECOUPLER
dn H1 wc 250
dof 0 sc 0
dm YYY th 16
dmm w ai cdc ph
dpwr 35
dmf 6700

```

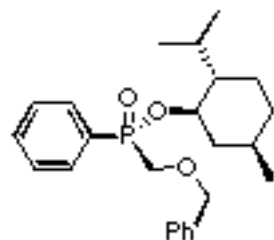

Compound (S<sub>P</sub>)-23  
<sup>31</sup>P/<sup>1</sup>H NMR decoupled

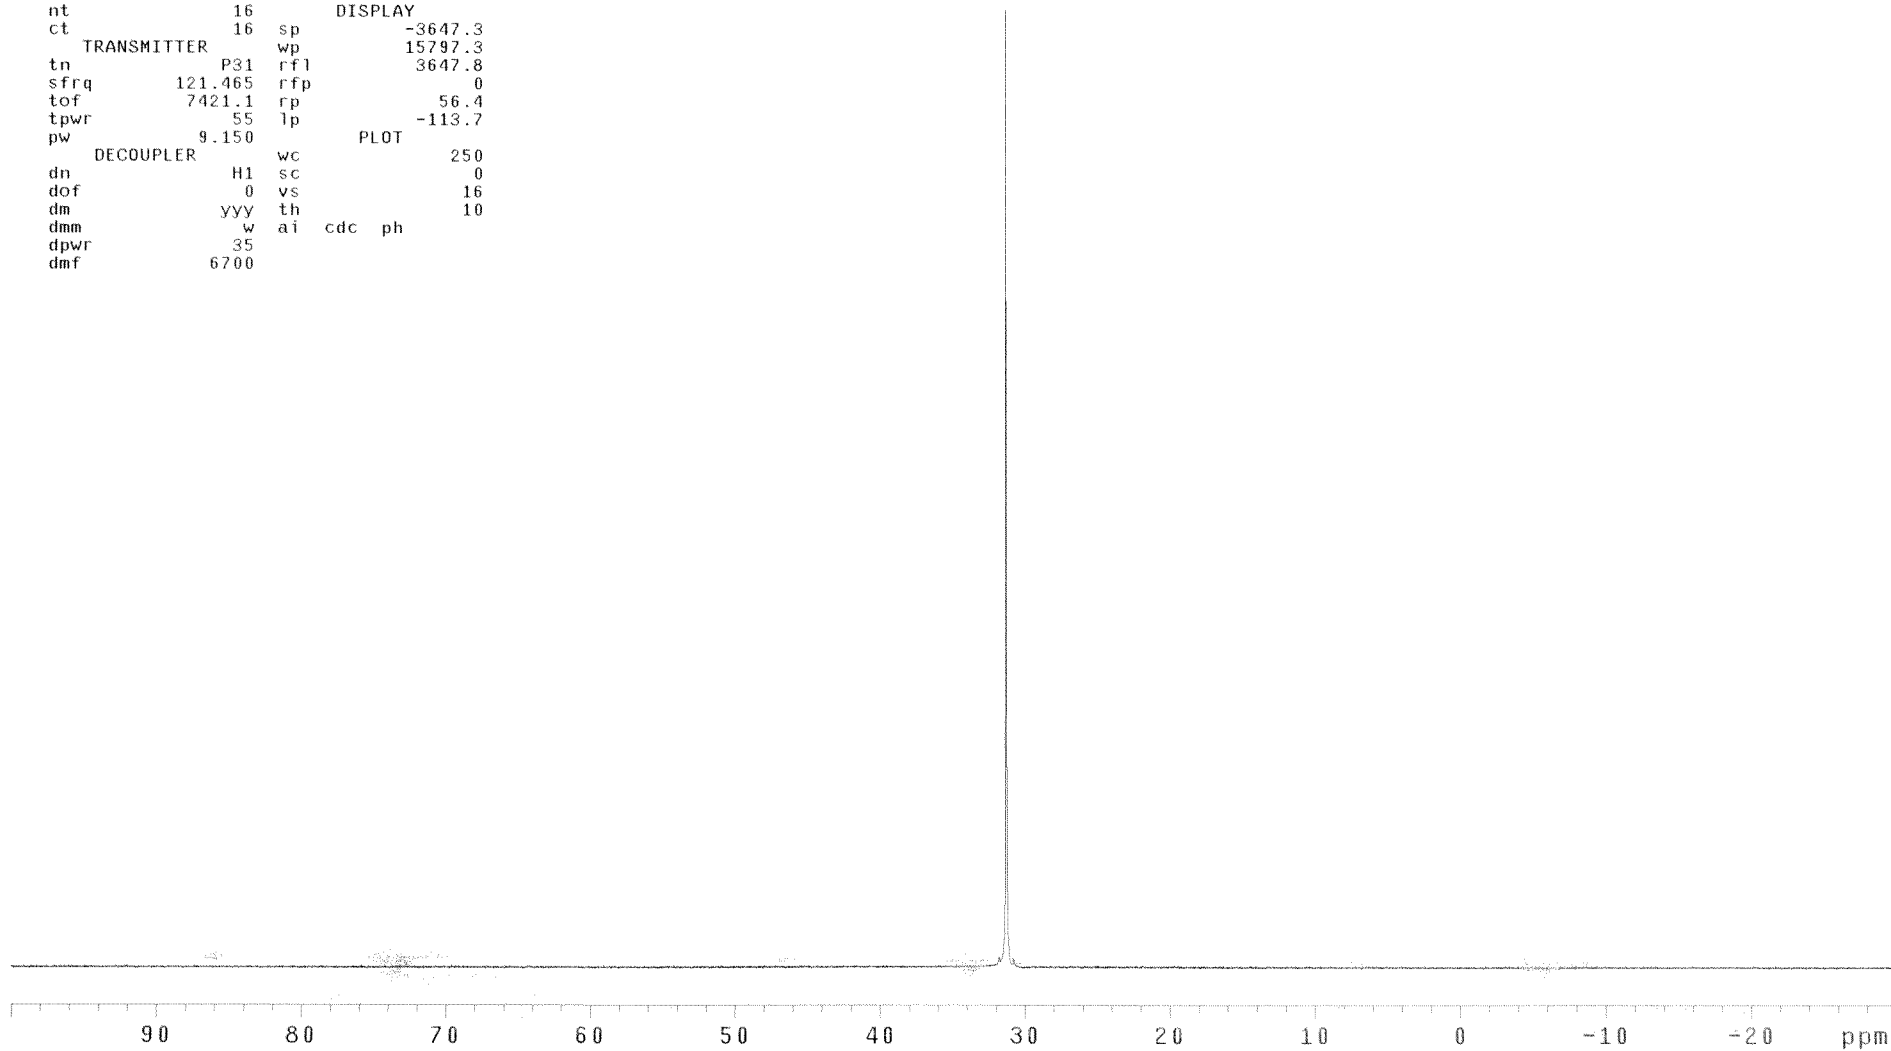

OB 396

exp1 Phosphorus

| SAMPLE              |                | SPECIAL    |          |
|---------------------|----------------|------------|----------|
| date                | Apr 25 2012    | temp       | not used |
| solvent             | D2O            | gain       | 20       |
| file                | /home/TCUuser~ | spin       | 20       |
| /vnmr               | sys/data/auto~ | hsi        | 0.008    |
| _2012.04.23/s_2012~ |                | pw90       | 18.300   |
| 0425_05/data/D20_0~ |                | alfa       | 10.000   |
|                     | 4.fid          | FLAGS      |          |
| ACQUISITION         |                | PROCESSING |          |
| sw                  | 15797.8        | il         | n        |
| at                  | 1.600          | in         | n        |
| np                  | 50552          | dp         | y        |
| fb                  | 8800           | hs         | ny       |
| bs                  | 64             | lb         | 1.00     |
| d1                  | 1.000          | fn         | not used |
| nt                  | 16             | DISPLAY    |          |
| ct                  | 16             | sp         | -3647.3  |
| TRANSMITTER         |                | wp         | 15797.3  |
| tn                  | P31            | rfl        | 3647.8   |
| sfrq                | 121.465        | rfp        | 0        |
| tof                 | 7421.1         | rp         | 111.5    |
| tpwr                | 55             | lp         | -113.7   |
| pw                  | 9.150          | PLOT       |          |
| DECOUPLER           |                | wc         | 250      |
| dn                  | H1             | sc         | 0        |
| dof                 | 0              | vs         | 75       |
| dm                  | ynn            | th         | 17       |
| dmm                 | w              | ai         | cdc ph   |
| dpr                 | 35             |            |          |
| dpr                 | 6700           |            |          |

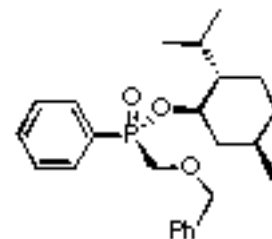

Compound (S<sub>P</sub>)-23  
31P/1H NMR coupled

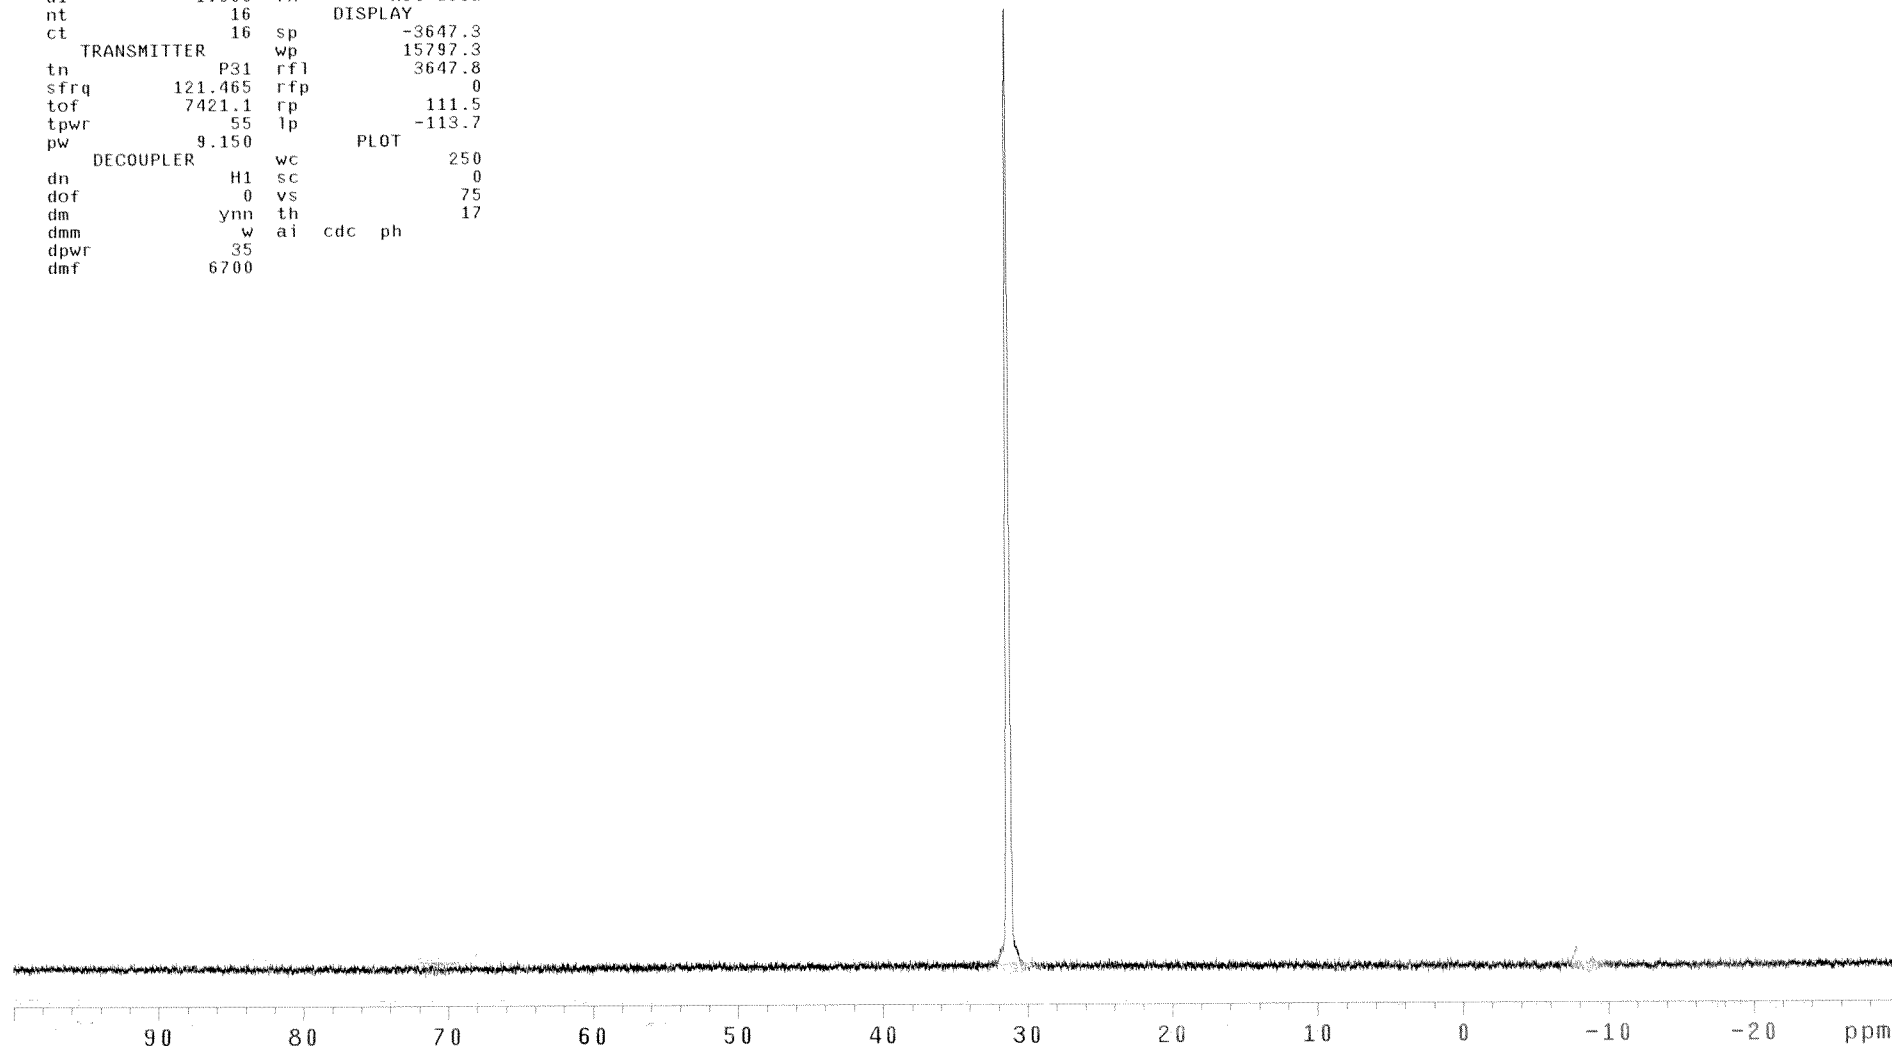

OB 396  
pad=10 run with findz0 before acquisition

exp1 Proton

|                     |                |           |        |
|---------------------|----------------|-----------|--------|
| SAMPLE              |                | DEC. & VT |        |
| date                | Apr 25 2012    | dfrq      | 75.454 |
| solvent             | cdcl3          | dn        | C13    |
| file                | /home/TCUuser~ | dpwr      | 43     |
| /vnmrsys/data/auto~ |                | dof       | 0      |
| _2012.04.23/s_2012~ |                | dm        | nnn    |
| 0425_02/data/cdcl3~ |                | dmm       | c      |
| _01.fid             |                | dmf       | 13100  |

|             |          |            |                  |
|-------------|----------|------------|------------------|
| ACQUISITION |          | PROCESSING |                  |
| sfrq        | 300.047  | wtfile     |                  |
| tn          | H1       | proc       | ft               |
| at          | 1.938    | fn         | not used         |
| np          | 19184    |            |                  |
| sw          | 4800.8   | werr       | xmreact          |
| fb          | 2600     | wexp       | abortoff flus~   |
| bs          | 16       | h          | procplot aborton |
| tpwr        | 55       | wbs        |                  |
| pw          | 7.9      | wnt        |                  |
| d1          | 1.000    |            |                  |
| tof         | 277.9    |            |                  |
| nt          | 32       |            |                  |
| ct          | 32       |            |                  |
| alock       | y        |            |                  |
| gain        | not used |            |                  |

|       |   |
|-------|---|
| FLAGS |   |
| il    | n |
| in    | n |
| dp    | y |

|         |        |
|---------|--------|
| DISPLAY |        |
| sp      | -599.8 |
| wp      | 4800.5 |
| vs      | 193    |
| sc      | 0      |
| wc      | 240    |
| h2mm    | 20.00  |
| is      | 458.77 |
| rfl     | 600.1  |
| rfp     | 0      |
| th      | 3      |
| ins     | 2.000  |
| ai      | cdc ph |

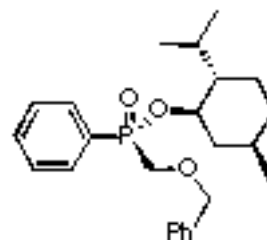

Compound (S<sub>P</sub>)-23  
<sup>1</sup>H NMR

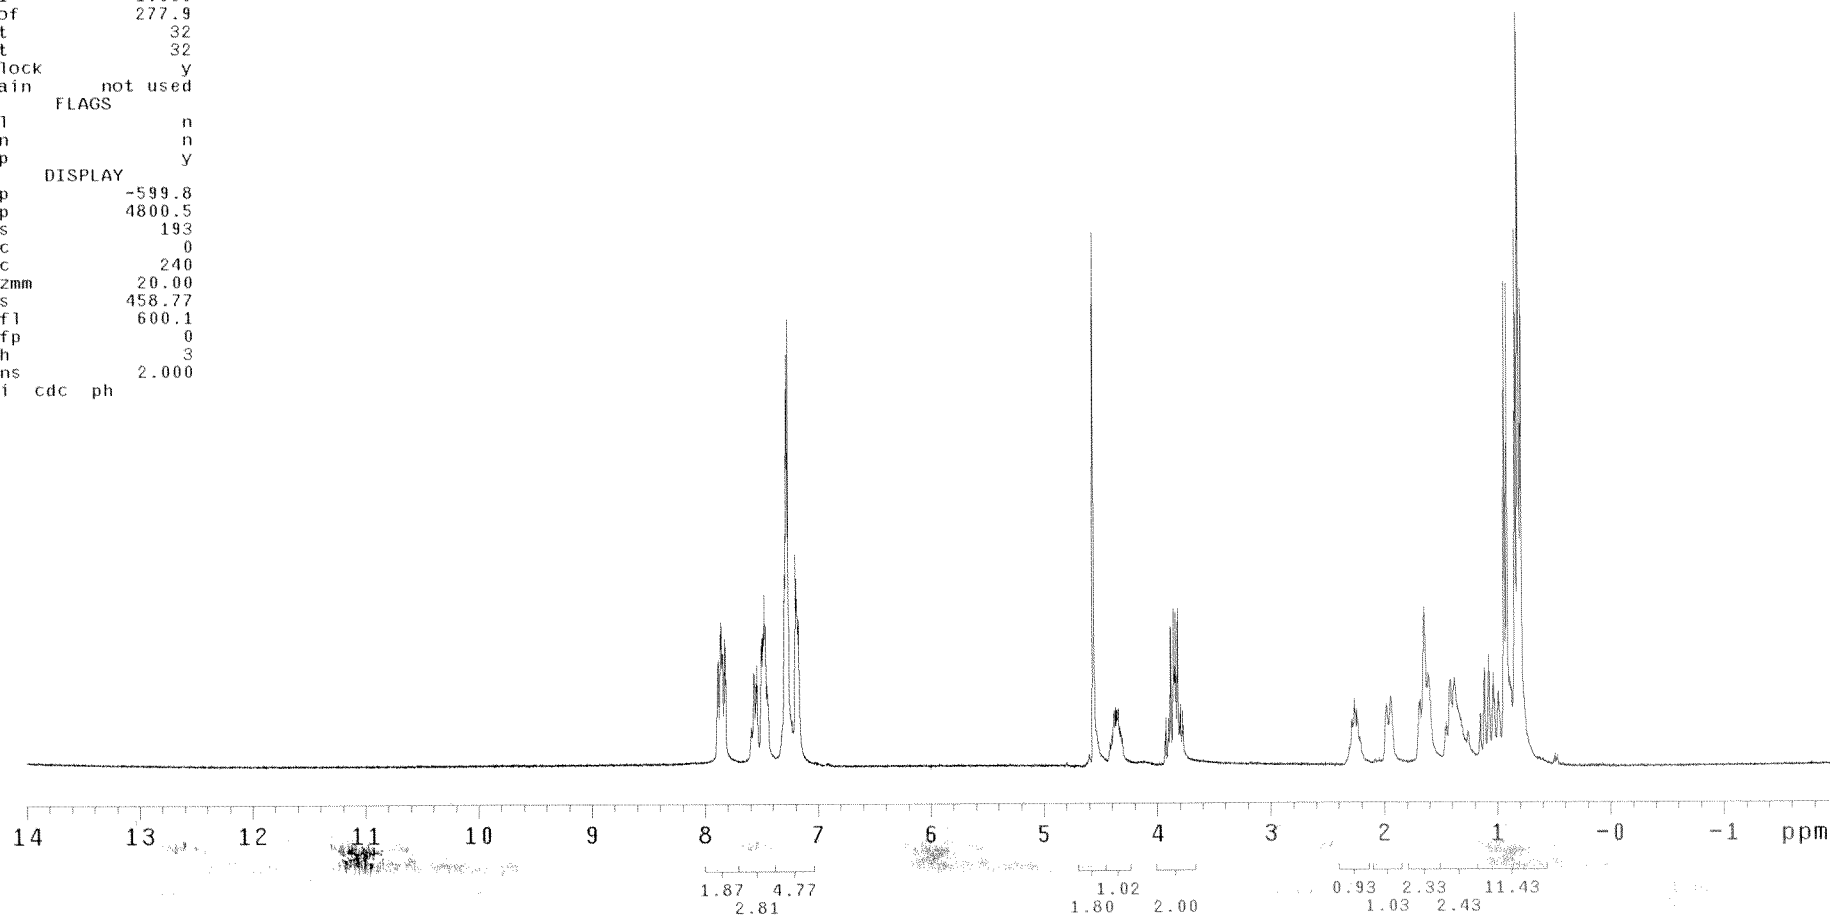

OB 396

pad=10 run with findz0 before acquisition

exp1 Carbon

| SAMPLE              |                | SPECIAL |          |
|---------------------|----------------|---------|----------|
| date                | Apr 25 2012    | temp    | not used |
| solvent             | cdc13          | gain    | 20       |
| file                | /home/TCUuser~ | spin    | 20       |
| /vnmrsys/data/auto~ |                | hst     | 0.008    |
| _2012.04.23/s_2012~ |                | pw90    | 18.500   |
| 0425_06/data/cdc13~ |                | alfo    | 10.000   |

| ACQUISITION |         | FLAGS   |          |
|-------------|---------|---------|----------|
| sw          | 18115.9 | il      | n        |
| at          | 1.301   | in      | n        |
| np          | 47120   | dp      | y        |
| fb          | 10000   | hs      | nn       |
| bs          | 64      | lb      | 0.50     |
| d1          | 2.000   | fn      | not used |
| nt          | 512     | DISPLAY |          |
| ct          | 512     | sp      | -1135.5  |
| TRANSMITTER |         | wp      | 18115.4  |
| tn          | C13     | rfl     | 1136.1   |
| sfrq        | 75.454  | rfg     | 0        |
| tof         | 766.0   | rp      | 3.1      |
| tpwr        | 58      | lp      | -206.2   |
| pw          | 9.250   | PLOT    |          |
| DECOUPLER   |         | wc      | 250      |
| dn          | H1      | sc      | 0        |
| dof         | 0       | vs      | 219      |
| dm          | yyy     | th      | 4        |
| dmm         | w       | ai      | cdc ph   |
| dpwr        | 35      |         |          |
| dmf         | 6700    |         |          |

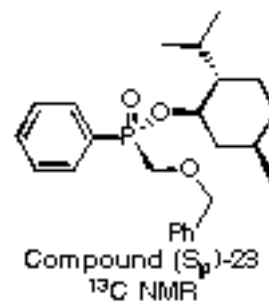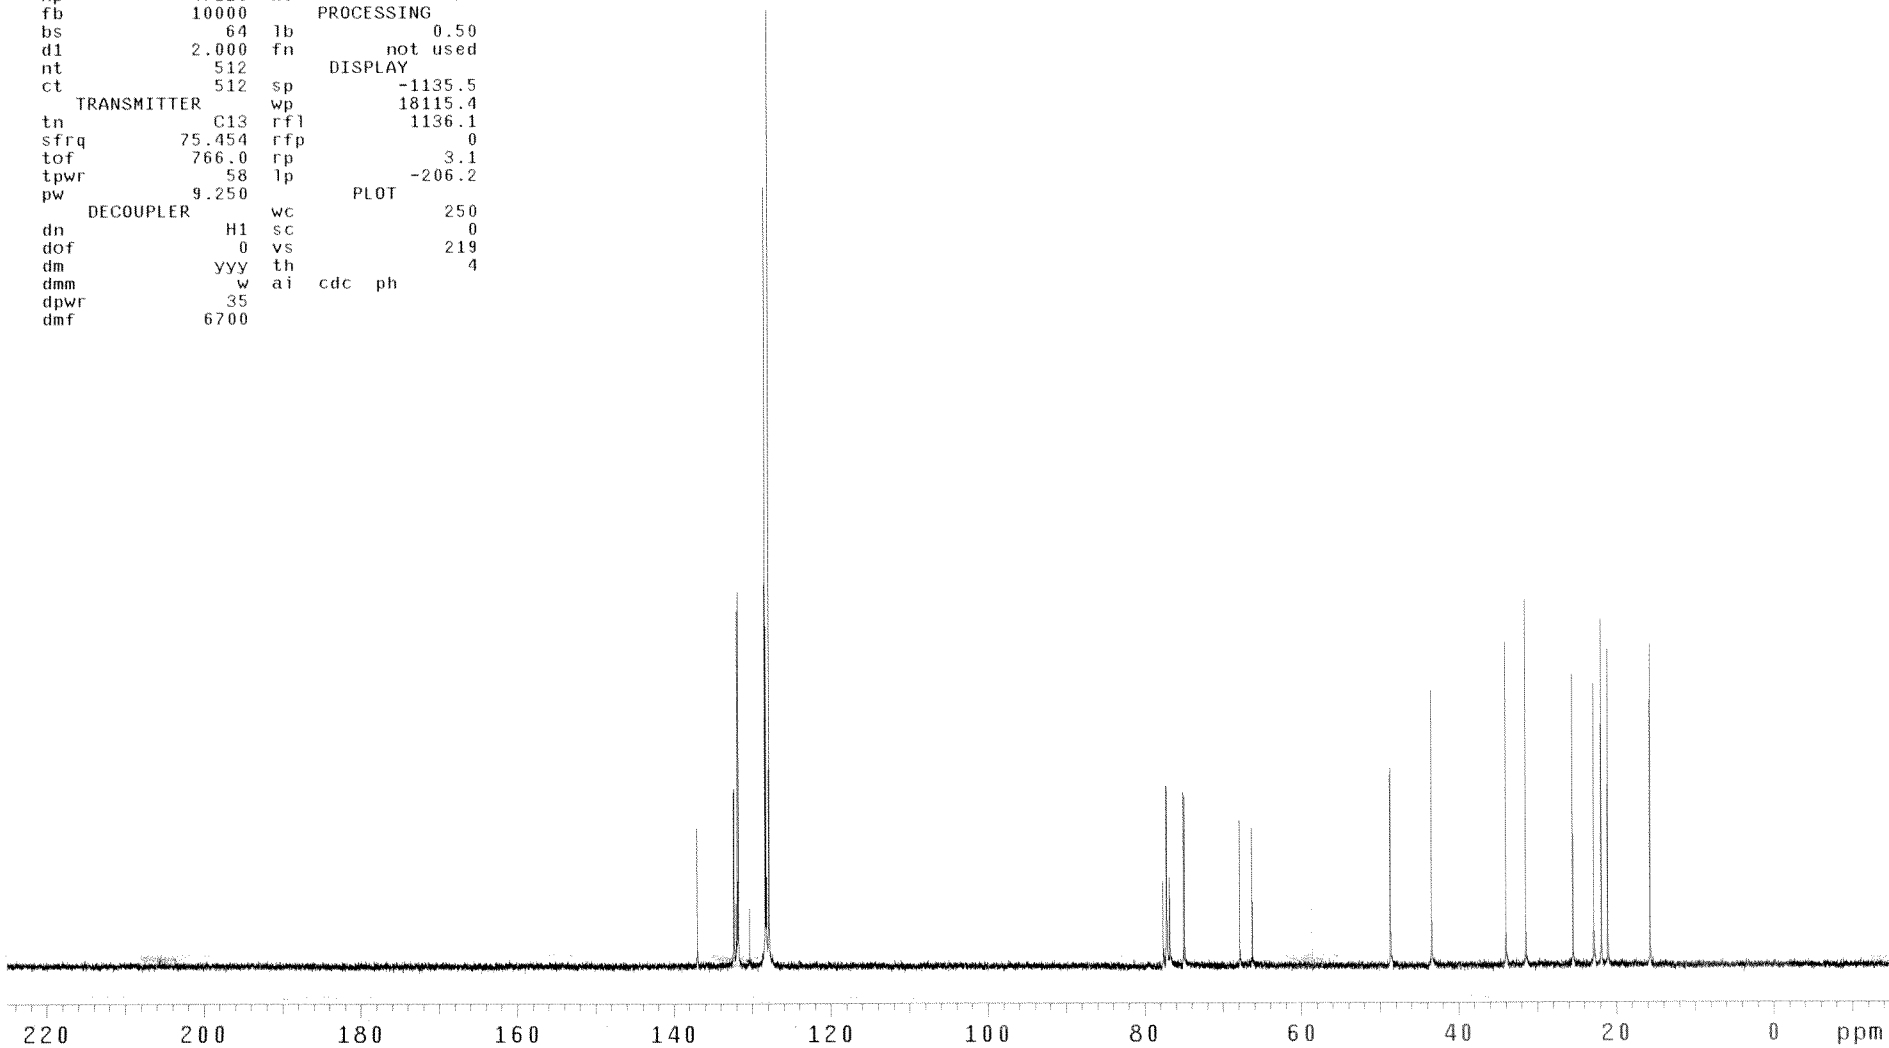

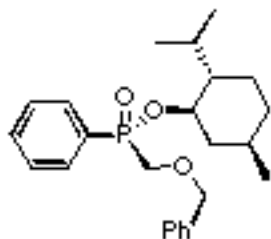

Compound (S<sub>p</sub>)-23  
<sup>31</sup>P/<sup>1</sup>H NMR decoupled

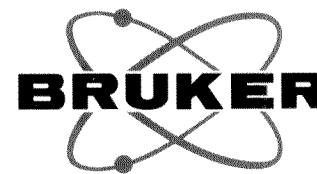

Current Data Parameters  
 NAME OB 1816 after column  
 EXPNO 1  
 PROCNO 1

F2 - Acquisition Parameters  
 Date\_ 20141107  
 Time\_ 17.36  
 INSTRUM spect  
 PROBHD 5 mm PABBO BB/  
 PULPROG zgpg30  
 TD 65536  
 SOLVENT CDC13  
 NS 16  
 DS 4  
 SWH 64102.563 Hz  
 FIDRES 0.978127 Hz  
 AQ 0.5111808 sec  
 RG 203.57  
 DW 7.800 usec  
 DE 6.50 usec  
 TE 295.8 K  
 D1 2.00000000 sec  
 D11 0.03000000 sec  
 TD0 1

==== CHANNEL f1 =====  
 SFO1 161.9674942 MHz  
 NUC1 31P  
 P1 14.25 usec  
 PLW1 15.00000000 W

==== CHANNEL f2 =====  
 SFO2 400.1316005 MHz  
 NUC2 1H  
 CPDPRG[2] waltz16  
 PCPD2 90.00 usec  
 PLW2 10.00000000 W  
 PLW12 0.31604999 W  
 PLW13 0.25600001 W

F2 - Processing parameters  
 SI 32768  
 SF 161.9755930 MHz  
 WDW EM  
 SSB 0  
 LB 2.00 Hz  
 GB 0  
 PC 1.40

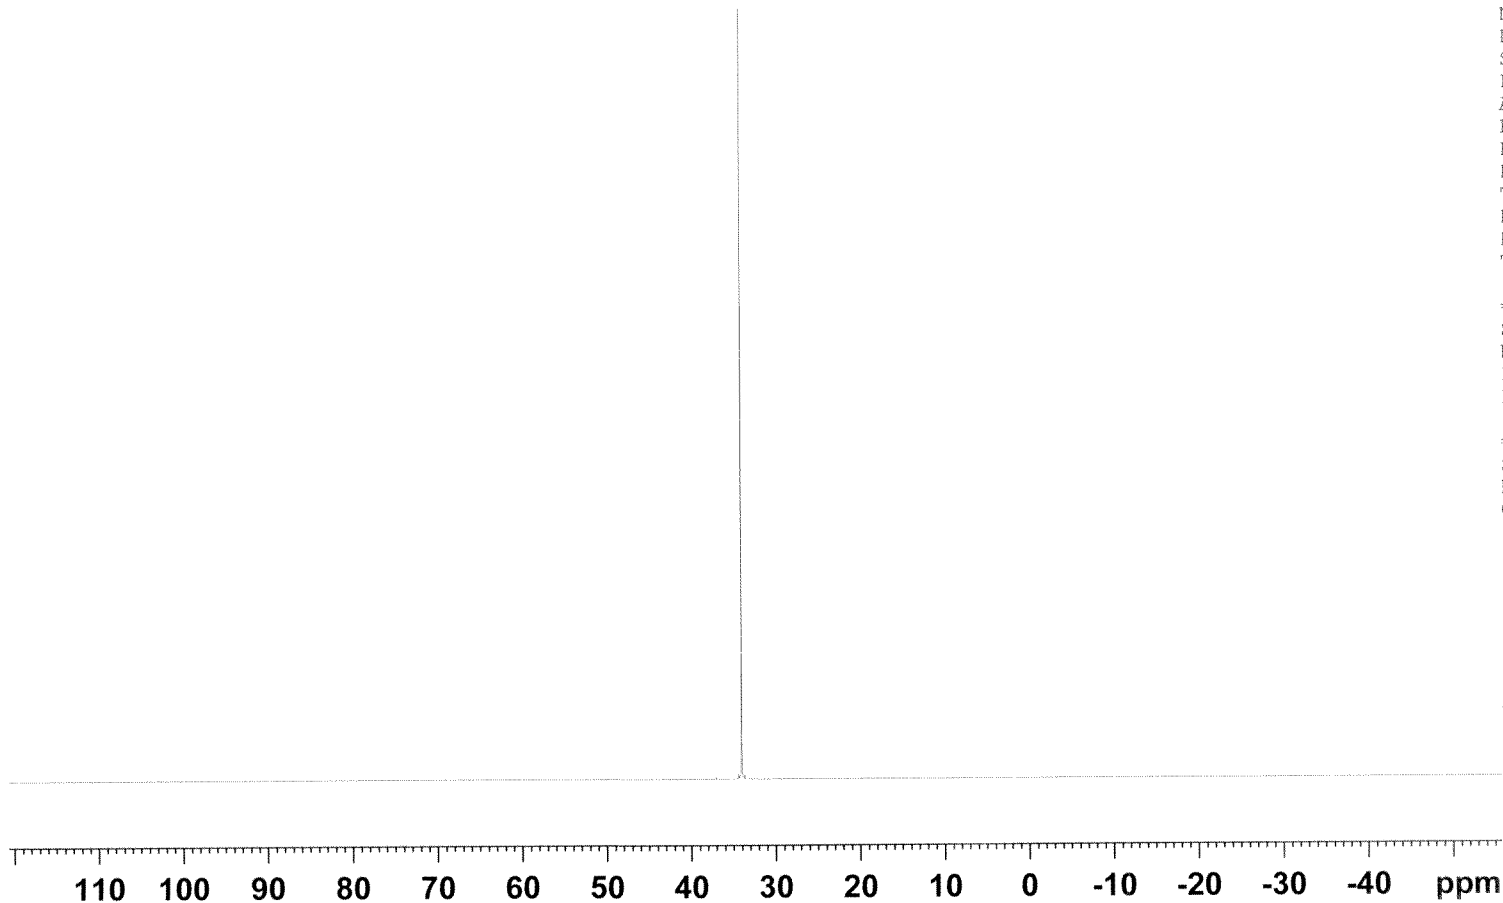

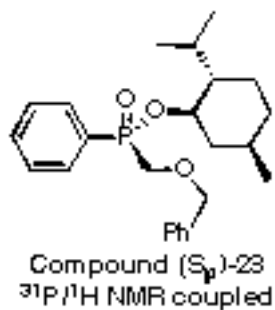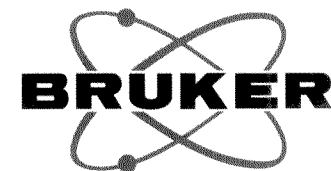

Current Data Parameters  
 NAME OB 1816 after column  
 EXPNO 2  
 PROCNO 1

F2 - Acquisition Parameters  
 Date\_ 20141107  
 Time\_ 17.38  
 INSTRUM spect  
 PROBHD 5 mm PABBO BB/  
 PULPROG zg30  
 TD 65536  
 SOLVENT CDC13  
 NS 22  
 DS 4  
 SWH 64102.563 Hz  
 FIDRES 0.978127 Hz  
 AQ 0.5111808 sec  
 RG 203.57  
 DW 7.800 usec  
 DE 6.50 usec  
 TE 295.5 K  
 D1 2.00000000 sec  
 TD0 1

==== CHANNEL f1 =====  
 SFO1 161.9674942 MHz  
 NUC1 31P  
 P1 14.25 usec  
 PLW1 15.00000000 W

F2 - Processing parameters  
 SI 32768  
 SF 161.9755930 MHz  
 WDW EM  
 SSB 0  
 LB 1.00 Hz  
 GB 0  
 PC 1.40

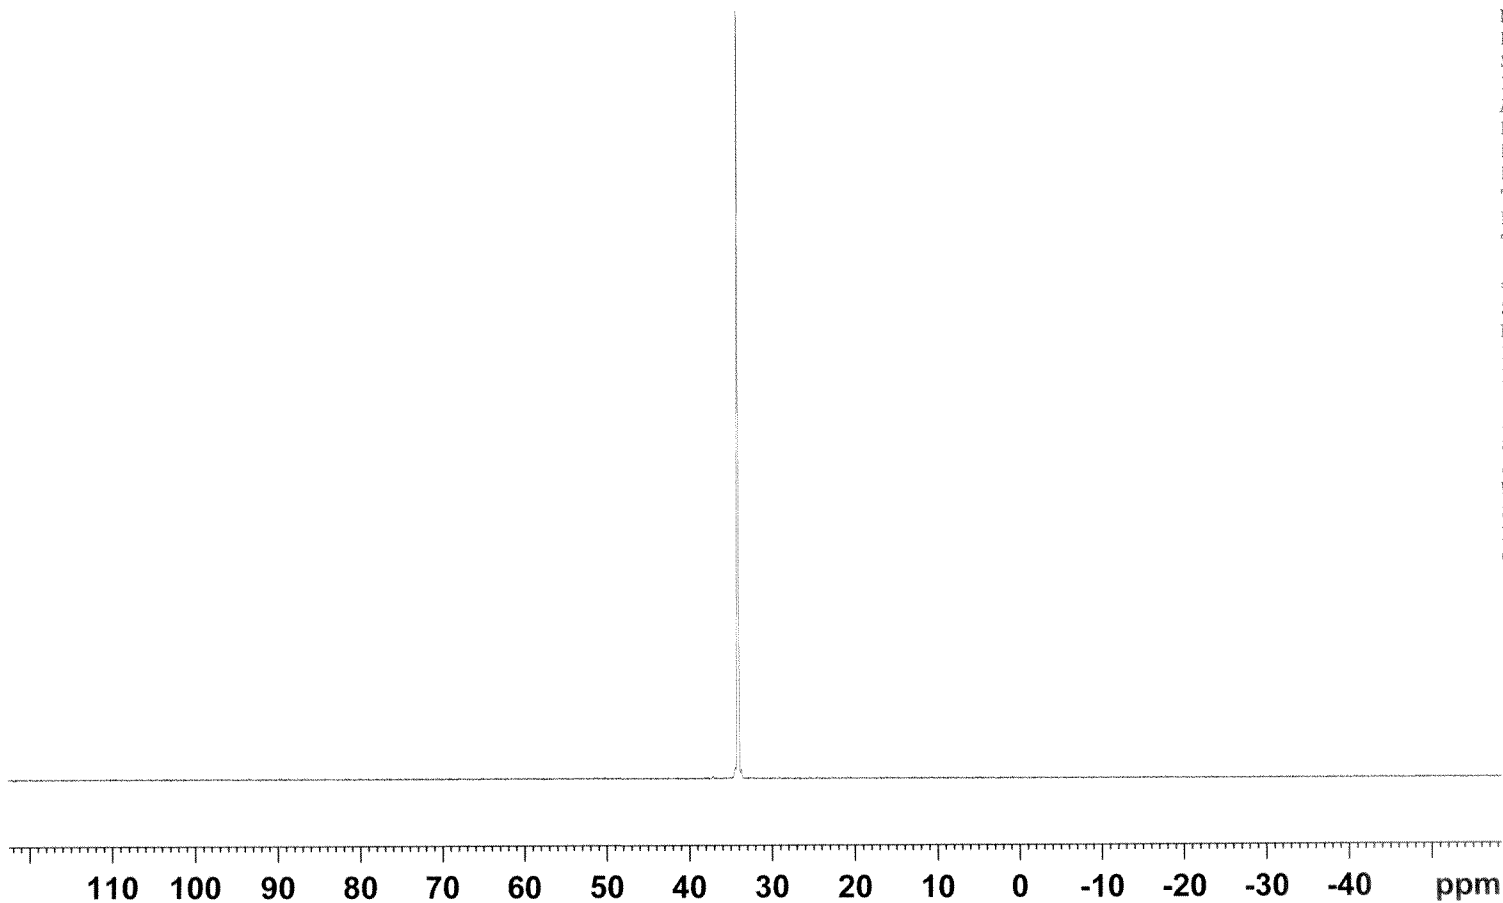

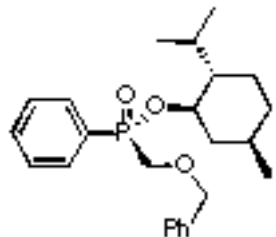

Compound (S<sub>p</sub>)-23  
<sup>1</sup>H NMR

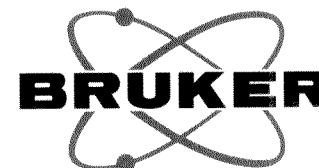

Current Data Parameters  
 NAME OB 1816 after column  
 EXPNO 3  
 PROCNO 1

F2 - Acquisition Parameters  
 Date\_ 20141107  
 Time\_ 17.41  
 INSTRUM spect  
 PROBHD 5 mm PABBO BB/  
 PULPROG zg30  
 TD 65536  
 SOLVENT CDCl3  
 NS 9  
 DS 2  
 SWH 8012.820 Hz  
 FIDRES 0.122266 Hz  
 AQ 4.0894465 sec  
 RG 11.05  
 DW 62.400 usec  
 DE 6.50 usec  
 TE 295.5 K  
 D1 1.0000000 sec  
 TDO 1

===== CHANNEL f1 =====  
 SFO1 400.1324710 MHz  
 NUC1 1H  
 P1 10.00 usec  
 PLW1 25.00300026 W

F2 - Processing parameters  
 SI 65536  
 SF 400.1300000 MHz  
 WDW EM  
 SSB 0  
 LB 0.30 Hz  
 GB 0  
 PC 1.00

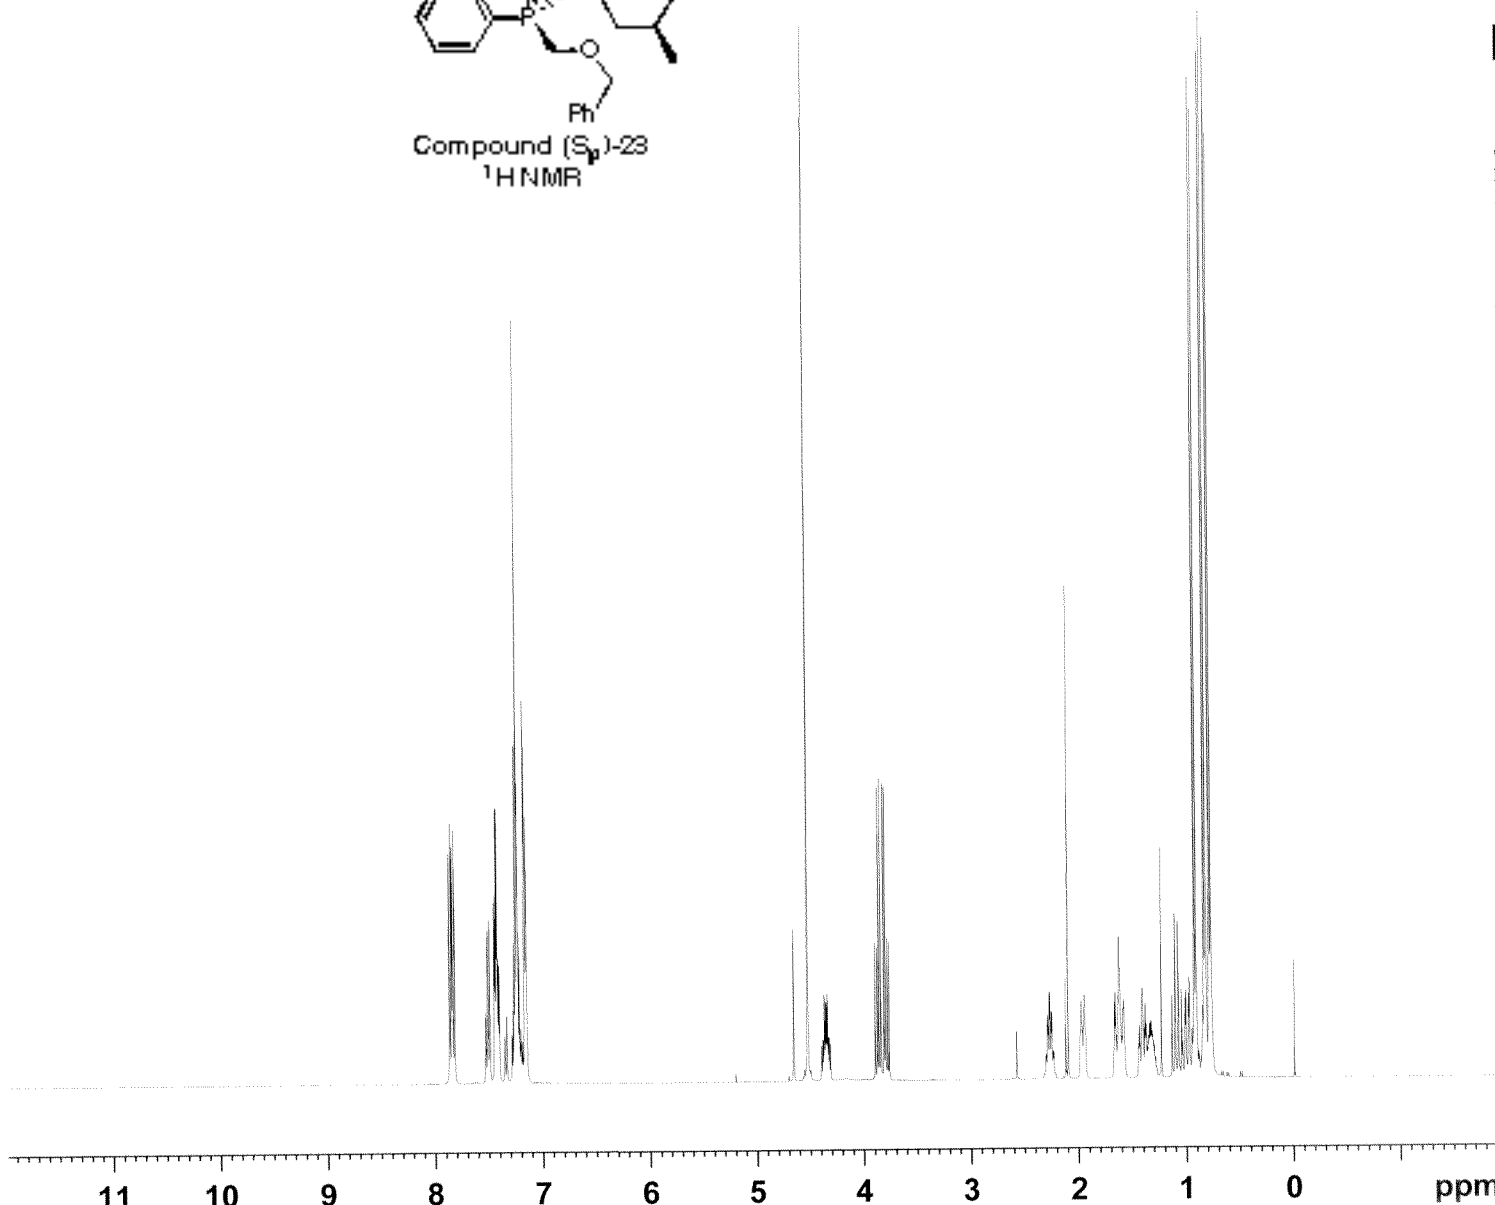

1.98  
 1.00  
 2.02  
 0.31  
 3.40  
 2.02

1.99  
 1.01  
 2.01

1.00  
 0.99  
 2.02  
 2.03  
 1.09  
 0.96  
 3.11  
 3.60  
 3.53



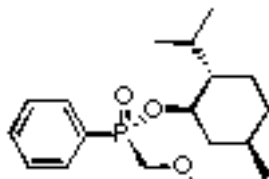

Compound (S<sub>p</sub>)-23  
<sup>13</sup>C NMR

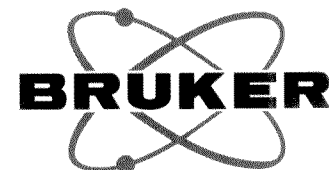

Current Data Parameters  
 NAME OB 1816 after column  
 EXPNO 4  
 PROCNO 1

F2 - Acquisition Parameters  
 Date\_ 20141107  
 Time\_ 17.53  
 INSTRUM spect  
 PROBHD 5 mm PABBO BB/  
 PULPROG zgpg30  
 TD 65536  
 SOLVENT CDC13  
 NS 174  
 DS 4  
 SWH 24038.461 Hz  
 FIDRES 0.366798 Hz  
 AQ 1.3631488 sec  
 RG 203.57  
 DW 20.800 usec  
 DE 6.50 usec  
 TE 296.2 K  
 D1 2.0000000 sec  
 D11 0.0300000 sec  
 TD0 1

==== CHANNEL f1 =====  
 SFO1 100.6228293 MHz  
 NUC1 13C  
 P1 10.00 usec  
 PLW1 45.0000000 W

==== CHANNEL f2 =====  
 SFO2 400.1316005 MHz  
 NUC2 1H  
 CPDPRG[2] waltz16  
 PCPD2 90.00 usec  
 PLW2 10.0000000 W  
 PLW12 0.31604999 W  
 PLW13 0.25600001 W

F2 - Processing parameters  
 SI 32768  
 SF 100.6127685 MHz  
 WDW EM  
 SSB 0  
 LB 1.00 Hz  
 GB 0  
 PC 1.40

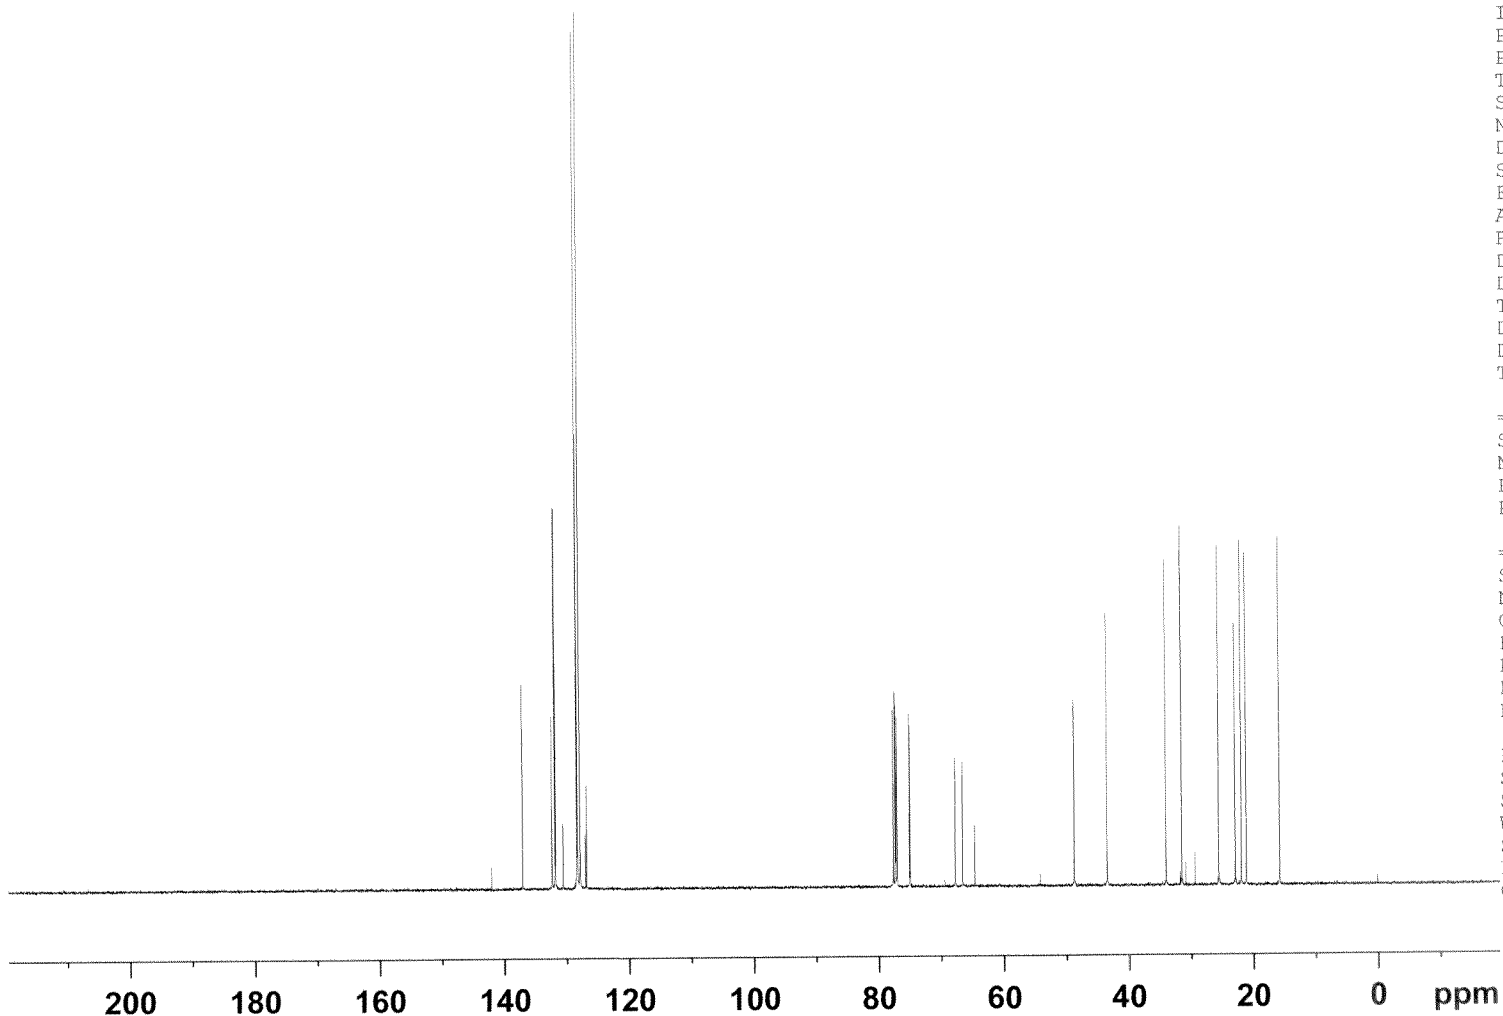

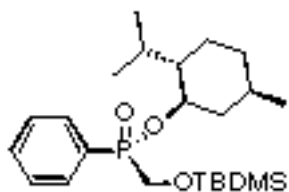

Compound (S<sub>p</sub>)-24  
<sup>31</sup>P/<sup>1</sup>H NMR decoupled

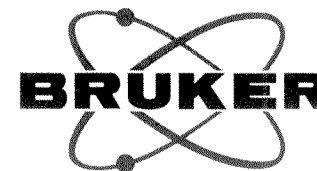

Current Data Parameters  
 NAME OB 1584 pure  
 EXPNO 1  
 PROCNO 1

F2 - Acquisition Parameters  
 Date 20140716  
 Time 10.20  
 INSTRUM spect  
 PROBHD 5 mm PABBO BB/  
 PULPROG zgpg30  
 TD 65536  
 SOLVENT CDC13  
 NS 16  
 DS 4  
 SWH 64102.563 Hz  
 FIDRES 0.978127 Hz  
 AQ 0.5111808 sec  
 RG 203.57  
 DW 7.800 usec  
 DE 6.50 usec  
 TE 294.8 K  
 D1 2.00000000 sec  
 D11 0.03000000 sec  
 TD0 1

===== CHANNEL f1 =====  
 SFO1 161.9674942 MHz  
 NUC1 31P  
 P1 14.25 usec  
 PLW1 15.00000000 W

===== CHANNEL f2 =====  
 SFO2 400.1316005 MHz  
 NUC2 1H  
 CPDPRG[2] waltz16  
 PCPD2 90.00 usec  
 PLW2 10.00000000 W  
 PLW12 0.31604999 W  
 PLW13 0.25600001 W

F2 - Processing parameters  
 SI 32768  
 SF 161.9755930 MHz  
 WDW EM  
 SSB 0  
 LB 1.00 Hz  
 GB 0  
 PC 1.40

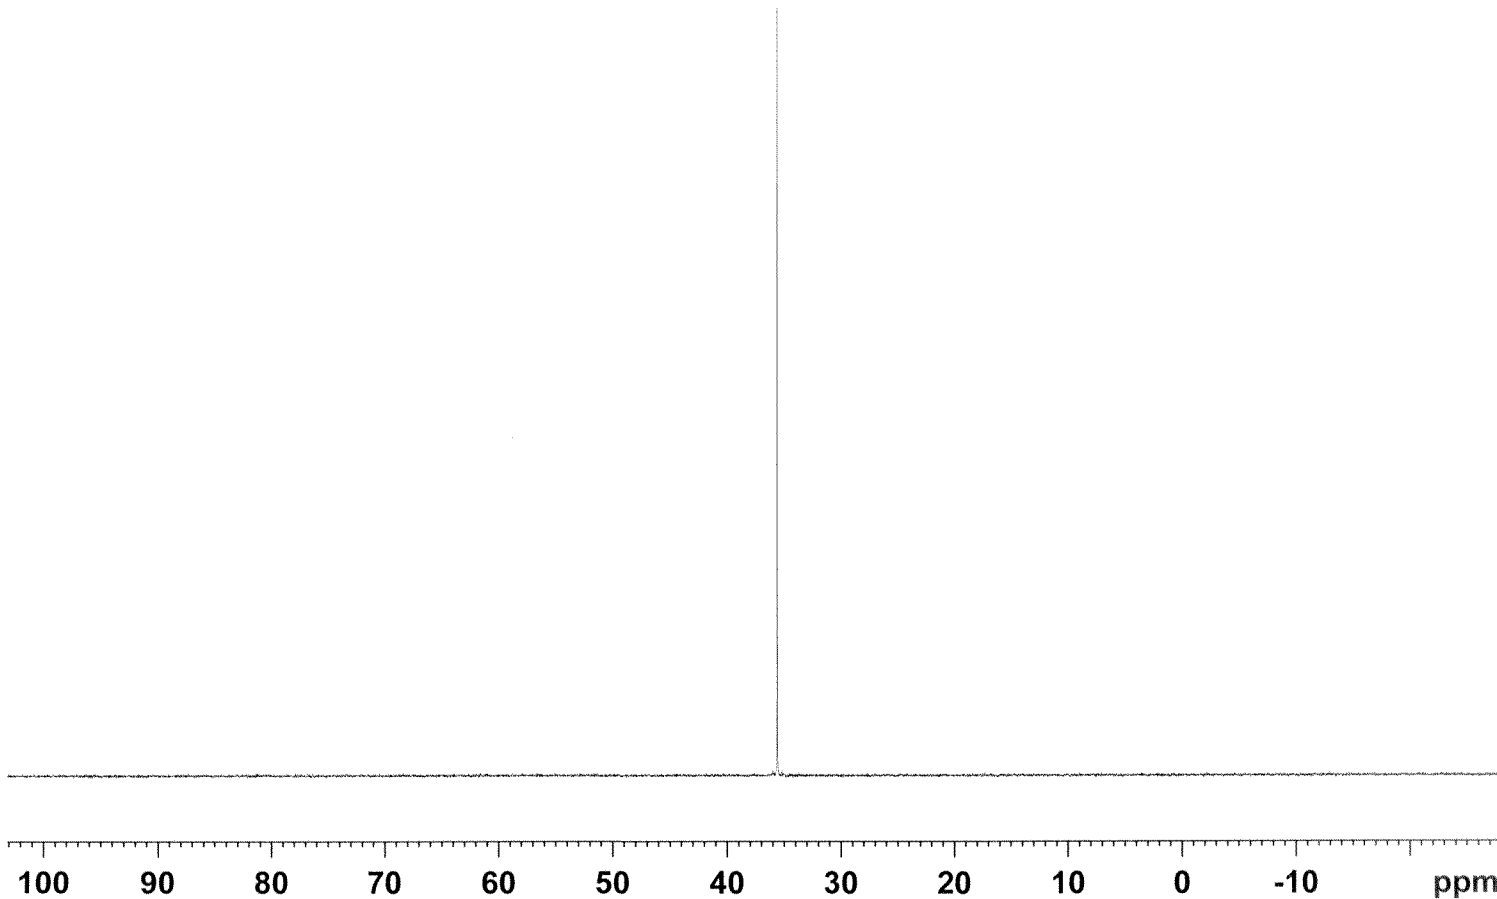

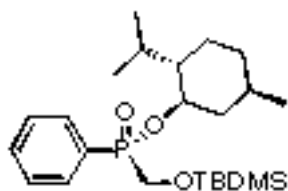

Compound (S<sub>P</sub>)-24  
<sup>31</sup>P/<sup>1</sup>H NMR coupled

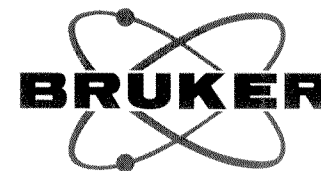

Current Data Parameters  
 NAME OB 1584 pure  
 EXPNO 2  
 PROCNO 1

F2 - Acquisition Parameters  
 Date\_ 20140716  
 Time\_ 10.22  
 INSTRUM spect  
 PROBHD 5 mm PABBO BB/  
 PULPROG zg30  
 TD 65536  
 SOLVENT CDC13  
 NS 32  
 DS 4  
 SWH 64102.563 Hz  
 FIDRES 0.978127 Hz  
 AQ 0.5111808 sec  
 RG 203.57  
 DW 7.800 usec  
 DE 6.50 usec  
 TE 294.5 K  
 D1 2.00000000 sec  
 TD0 1

===== CHANNEL f1 =====  
 SFO1 161.9674942 MHz  
 NUC1 31P  
 P1 14.25 usec  
 PLW1 15.00000000 W

F2 - Processing parameters  
 SI 32768  
 SF 161.9755930 MHz  
 WDW EM  
 SSB 0  
 LB 1.00 Hz  
 GB 0  
 PC 1.40

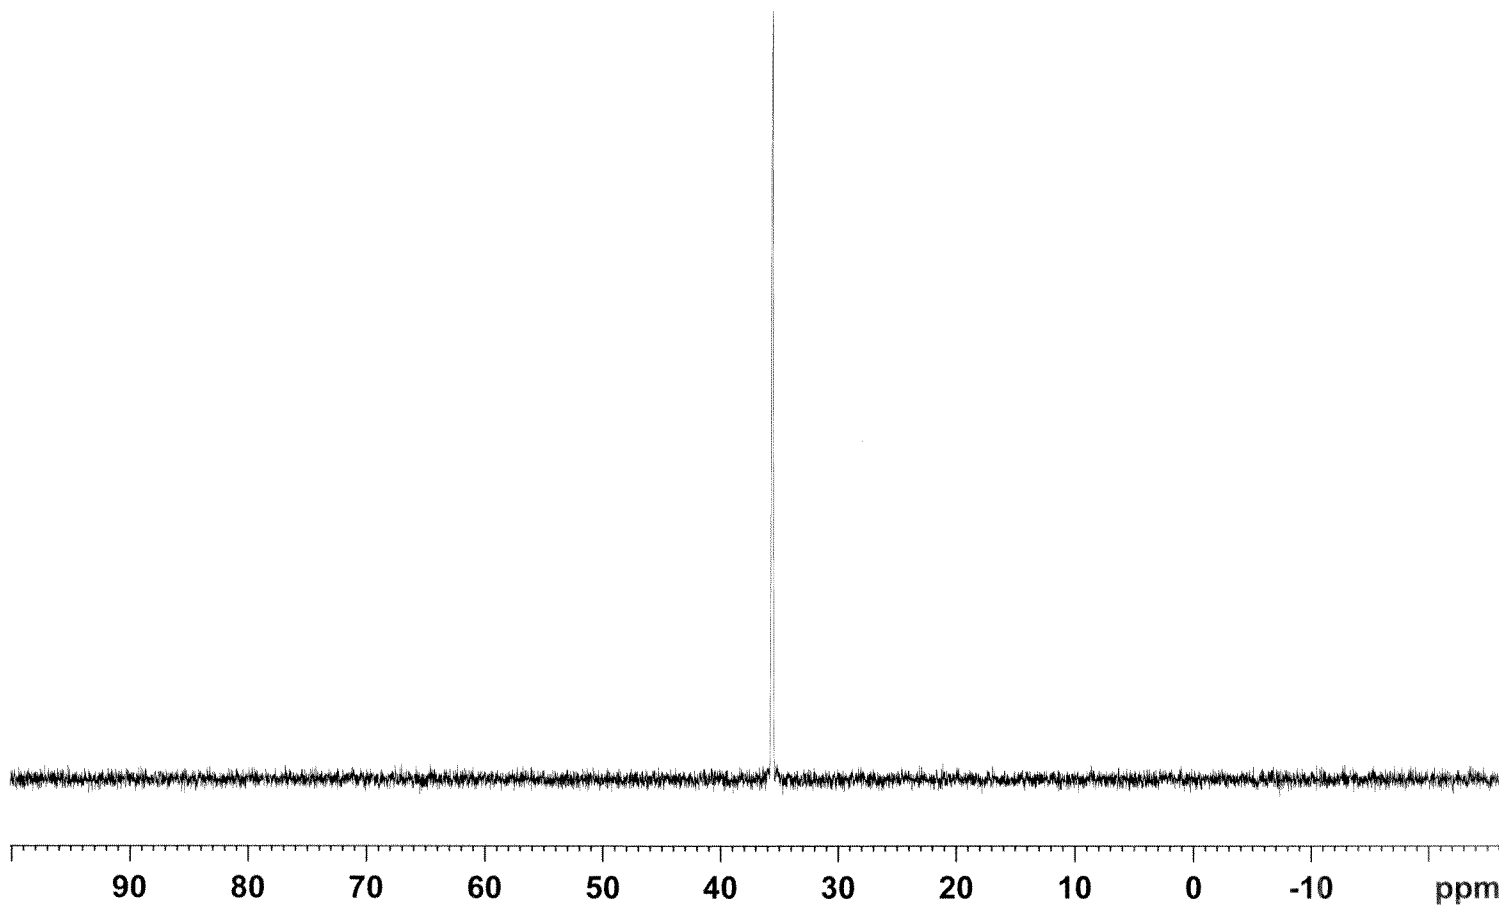

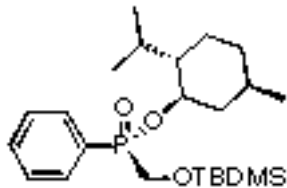

Compound (S<sub>p</sub>)-24  
<sup>1</sup>H NMR

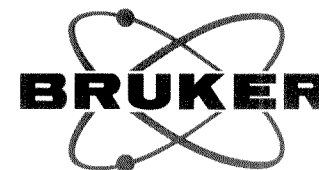

Current Data Parameters  
 NAME OB 1584 pure  
 EXPNO 3  
 PROCNO 1

F2 - Acquisition Parameters  
 Date\_ 20140716  
 Time\_ 10.25  
 INSTRUM spect  
 PROBHD 5 mm PABBO BB/  
 PULPROG zg30  
 TD 65536  
 SOLVENT CDC13  
 NS 16  
 DS 2  
 SWH 8012.820 Hz  
 FIDRES 0.122266 Hz  
 AQ 4.0894465 sec  
 RG 81.67  
 DW 62.400 usec  
 DE 6.50 usec  
 TE 294.4 K  
 D1 1.0000000 sec  
 TDO 1

==== CHANNEL f1 =====  
 SFO1 400.1324710 MHz  
 NUC1 1H  
 P1 10.00 usec  
 PLW1 25.00300026 W

F2 - Processing parameters  
 SI 65536  
 SF 400.1300000 MHz  
 WDW EM  
 SSB 0  
 LB 0.30 Hz  
 GB 0  
 PC 1.00

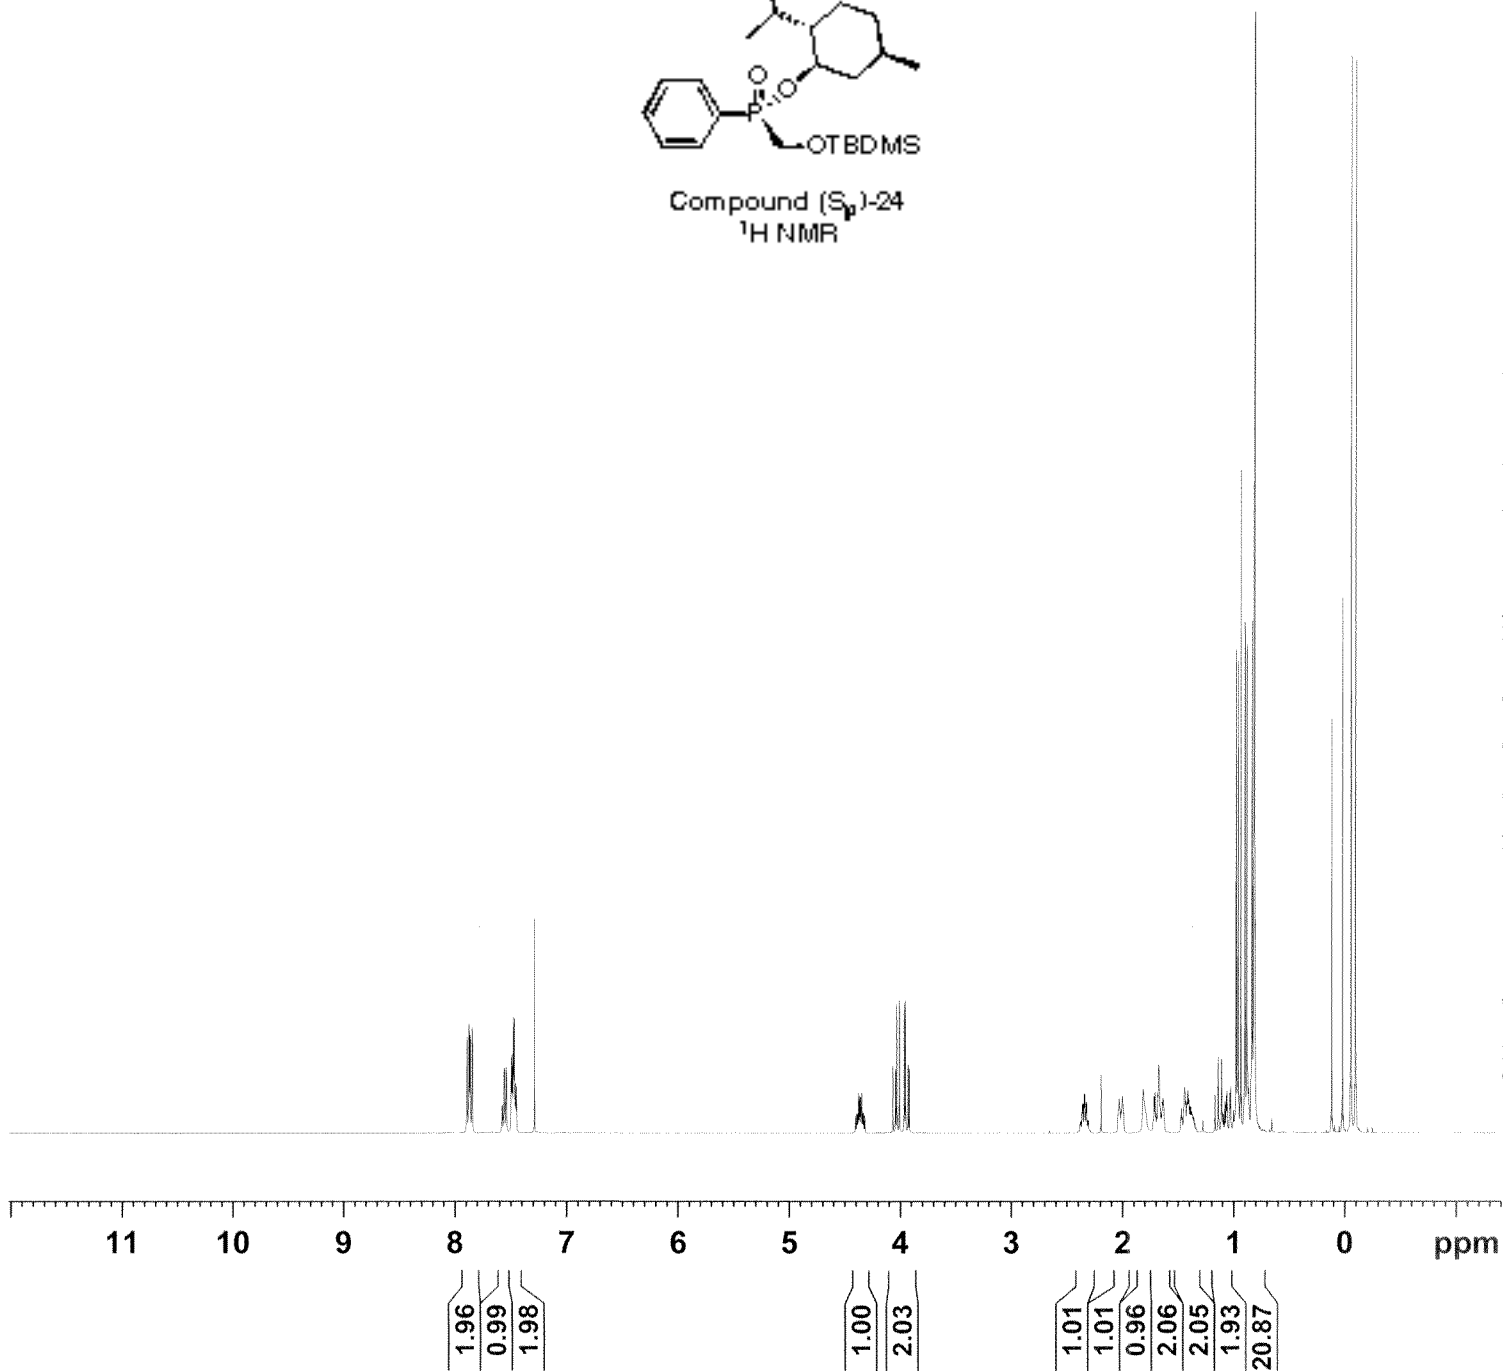

11 10 9 8 7 6 5 4 3 2 1 0 ppm

1.96  
 0.99  
 1.98  
 1.00  
 2.03  
 1.01  
 1.01  
 0.96  
 2.06  
 2.05  
 1.93  
 20.87

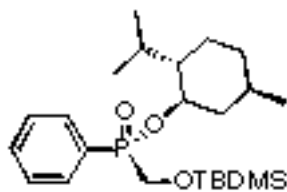

Compound (S<sub>p</sub>)-24  
<sup>13</sup>C NMR

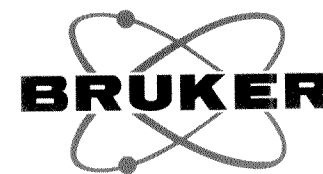

Current Data Parameters  
 NAME OB 1584 pure  
 EXPNO 4  
 PROCNO 1

F2 - Acquisition Parameters  
 Date 20151123  
 Time 18.16  
 INSTRUM spect  
 PROBHD 5 mm PABBO BB/  
 PULPROG zgpg30  
 TD 65536  
 SOLVENT CDCl3  
 NS 273  
 DS 4  
 SWH 24038.461 Hz  
 FIDRES 0.366798 Hz  
 AQ 1.3631488 sec  
 RG 203.57  
 DW 20.800 usec  
 DE 6.50 usec  
 TE 292.7 K  
 D1 2.0000000 sec  
 D11 0.0300000 sec  
 TD0 1

==== CHANNEL f1 =====  
 SFO1 100.6228293 MHz  
 NUC1 13C  
 P1 10.00 usec  
 PLW1 45.0000000 W

==== CHANNEL f2 =====  
 SFO2 400.1316005 MHz  
 NUC2 1H  
 CPDPRG[2] waltz16  
 PCPD2 90.00 usec  
 PLW2 10.0000000 W  
 PLW12 0.31604999 W  
 PLW13 0.25600001 W

F2 - Processing parameters  
 SI 32768  
 SF 100.6127685 MHz  
 WDW EM  
 SSB 0  
 LB 1.00 Hz  
 GB 0  
 PC 1.40

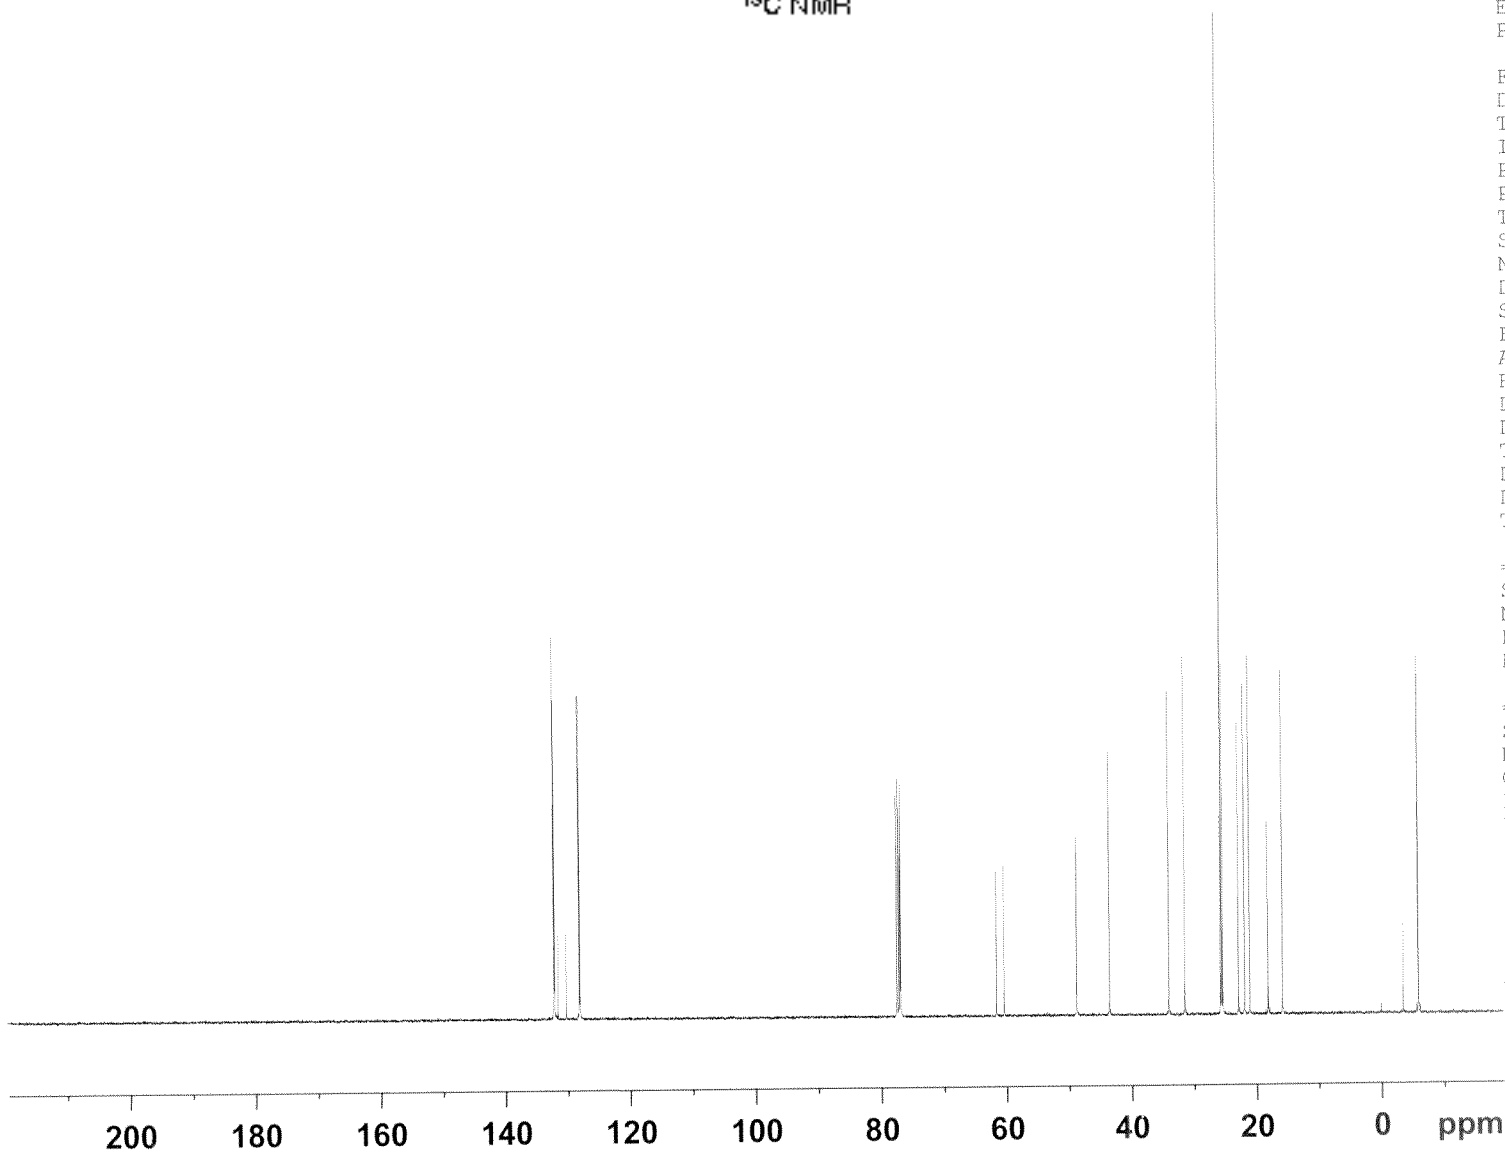

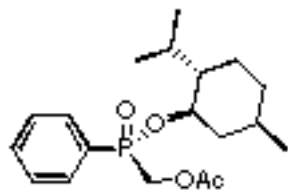

Compound (S<sub>p</sub>)-25  
<sup>31</sup>P/<sup>1</sup>H NMR decoupled

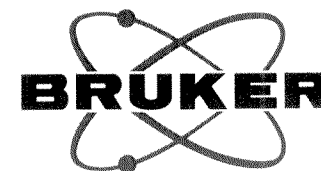

Current Data Parameters  
 NAME OB 1591  
 EXPNO 1  
 PROCNO 1

F2 - Acquisition Parameters  
 Date\_ 20140722  
 Time 9.29  
 INSTRUM spect  
 PROBHD 5 mm PABBO BB/  
 PULPROG zgpg30  
 TD 65536  
 SOLVENT Acetone  
 NS 16  
 DS 4  
 SWH 64102.563 Hz  
 FIDRES 0.978127 Hz  
 AQ 0.5111808 sec  
 RG 203.57  
 DW 7.800 usec  
 DE 6.50 usec  
 TE 295.6 K  
 D1 2.00000000 sec  
 D11 0.03000000 sec  
 TD0 1

==== CHANNEL f1 =====  
 SFO1 161.9674942 MHz  
 NUC1 31P  
 P1 14.25 usec  
 PLW1 15.00000000 W

==== CHANNEL f2 =====  
 SFO2 400.1316005 MHz  
 NUC2 1H  
 CPDPRG[2] waltz16  
 PCPD2 90.00 usec  
 PLW2 10.00000000 W  
 PLW12 0.31604999 W  
 PLW13 0.25600001 W

F2 - Processing parameters  
 SI 32768  
 SF 161.9755930 MHz  
 WDW EM  
 SSB 0  
 LB 1.00 Hz  
 GB 0  
 PC 1.40

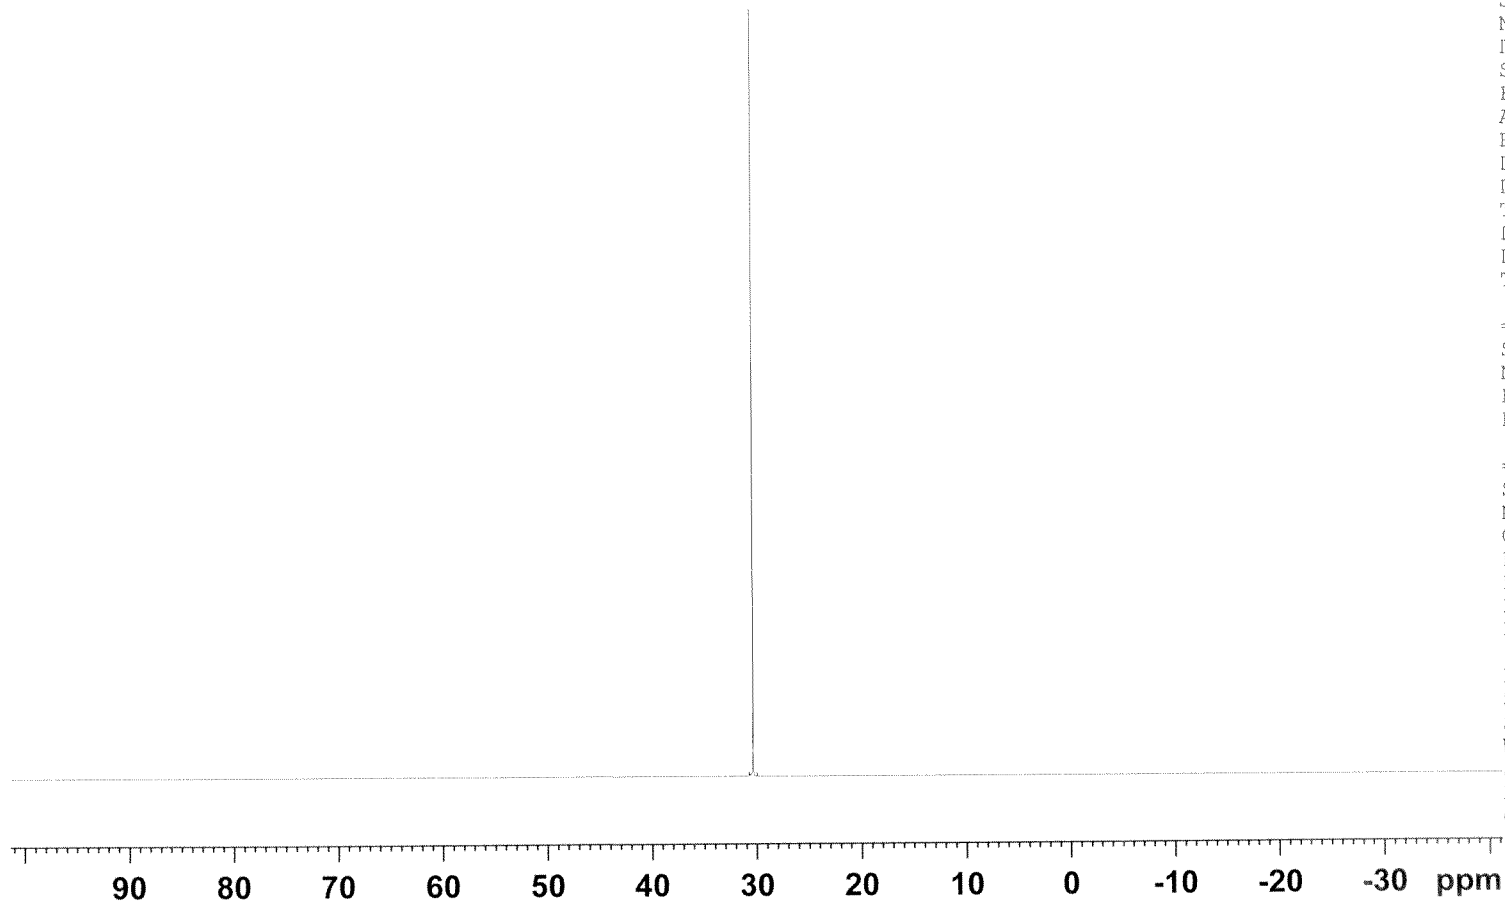

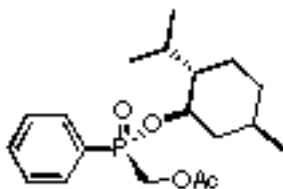

Compound (S<sub>p</sub>)-25  
<sup>31</sup>P/<sup>1</sup>H NMR coupled

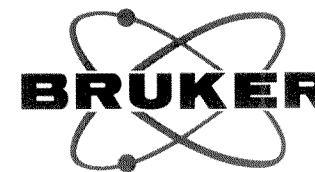

Current Data Parameters  
 NAME OB 1591  
 EXPNO 2  
 PROCNO 1

F2 - Acquisition Parameters  
 Date\_ 20140722  
 Time 9.31  
 INSTRUM spect  
 PROBHD 5 mm PABBO BB/  
 PULPROG zg30  
 TD 65536  
 SOLVENT Acetone  
 NS 22  
 DS 4  
 SWH 64102.563 Hz  
 FIDRES 0.978127 Hz  
 AQ 0.5111808 sec  
 RG 203.57  
 DW 7.800 usec  
 DE 6.50 usec  
 TE 295.2 K  
 D1 2.00000000 sec  
 TD0 1

==== CHANNEL f1 =====  
 SFO1 161.9674942 MHz  
 NUC1 31P  
 P1 14.25 usec  
 PLW1 15.00000000 W

F2 - Processing parameters  
 SI 32768  
 SF 161.9755930 MHz  
 WDW EM  
 SSB 0  
 LB 1.00 Hz  
 GB 0  
 PC 1.40

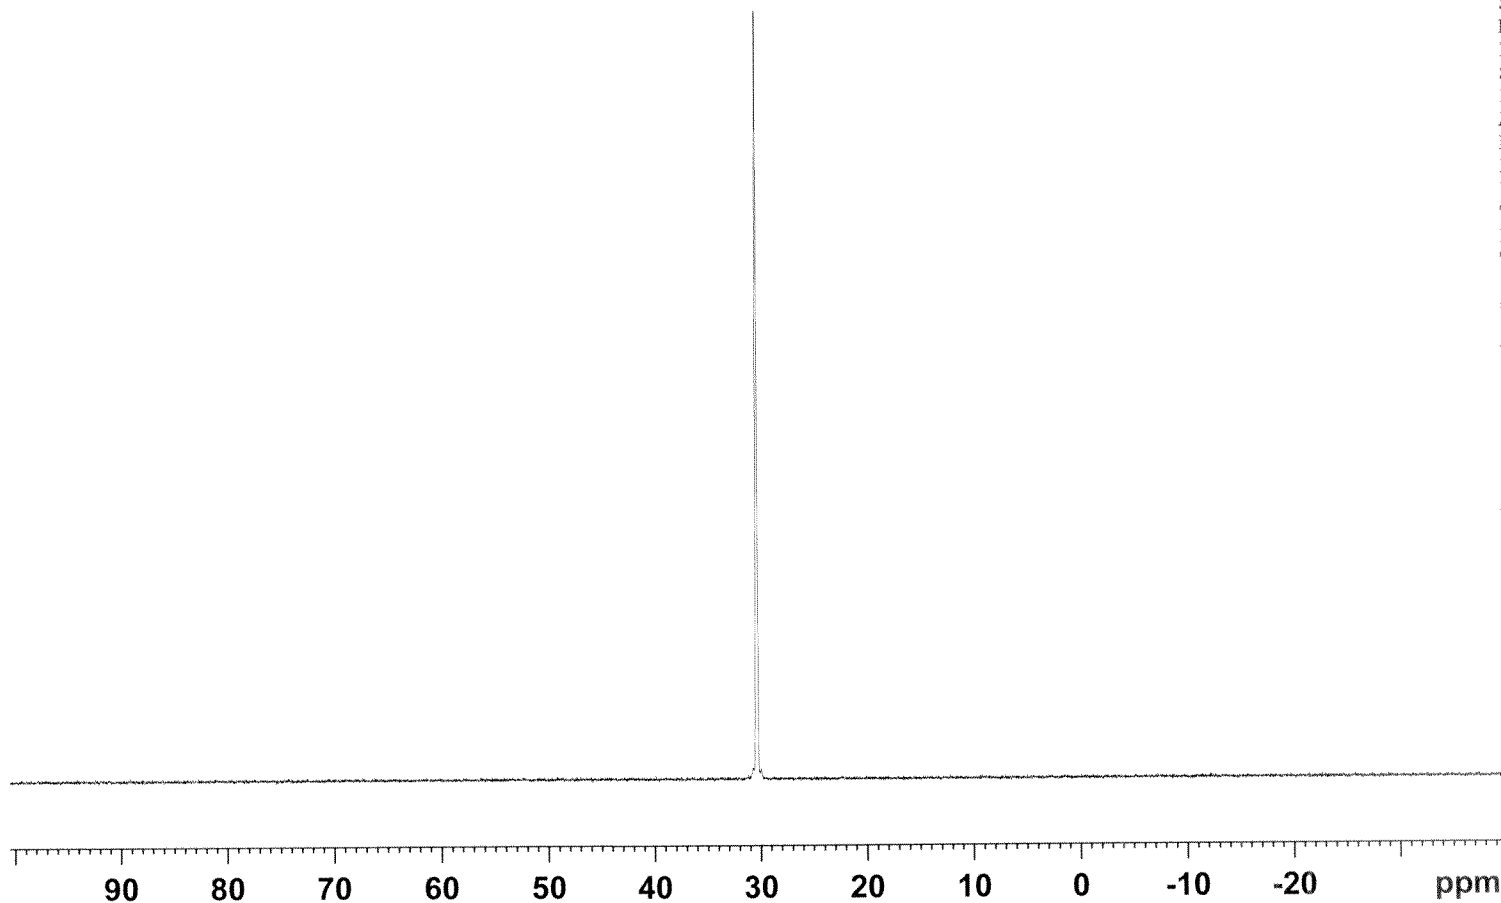

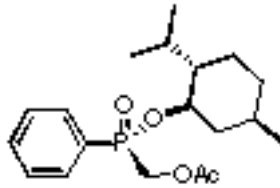

Compound (Sp)-25  
<sup>31</sup>P/<sup>1</sup>H NMR coupled

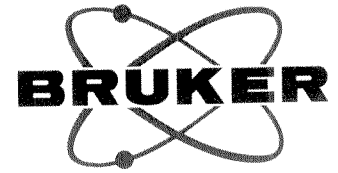

Current Data Parameters  
 NAME OB 1591  
 EXPNO 2  
 PROCNO 1

F2 - Acquisition Parameters  
 Date 20140722  
 Time 9.31  
 INSTRUM spect  
 PROBHD 5 mm PABBO BB/  
 PULPROG zg30  
 TD 65536  
 SOLVENT Acetone  
 NS 22  
 DS 4  
 SWH 64102.563 Hz  
 FIDRES 0.978127 Hz  
 AQ 0.5111808 sec  
 RG 203.57  
 DW 7.800 usec  
 DE 6.50 usec  
 TE 295.2 K  
 D1 2.00000000 sec  
 TDO 1

==== CHANNEL f1 =====  
 SFO1 161.9674942 MHz  
 NUC1 31P  
 P1 14.25 usec  
 PLW1 15.00000000 W

F2 - Processing parameters  
 SI 32768  
 SF 161.9755930 MHz  
 WDW EM  
 SSB 0  
 LB 1.00 Hz  
 GB 0  
 PC 1.40

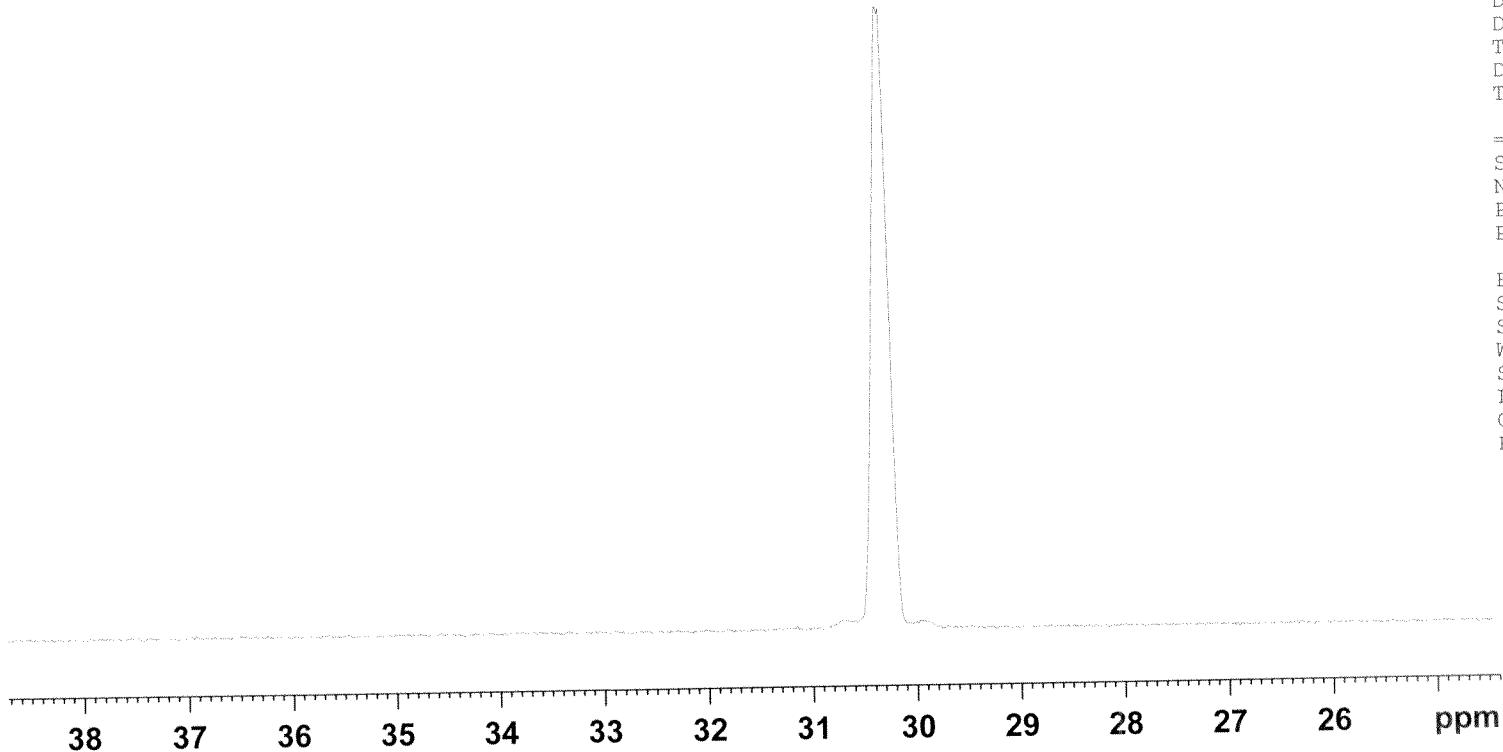



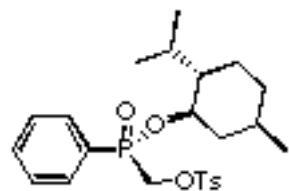

Compound (Sp)-26  
<sup>31</sup>P/<sup>1</sup>H NMR decoupled

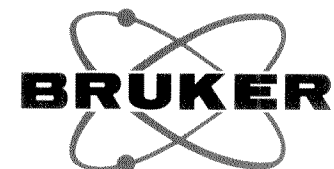

Current Data Parameters  
 NAME OB 648 2nd  
 EXPNO 1  
 PROCNO 1

F2 - Acquisition Parameters  
 Date\_ 20151119  
 Time\_ 9.45  
 INSTRUM spect  
 PROBHD 5 mm PABBO BB/  
 PULPROG zgpg30  
 TD 65536  
 SOLVENT CDCl3  
 NS 16  
 DS 4  
 SWH 64102.563 Hz  
 FIDRES 0.978127 Hz  
 AQ 0.5111808 sec  
 RG 203.57  
 DW 7.800 usec  
 DE 6.50 usec  
 TE 295.2 K  
 D1 2.0000000 sec  
 D11 0.03000000 sec  
 TDO 1

==== CHANNEL f1 =====  
 SFO1 161.9674942 MHz  
 NUC1 31P  
 P1 14.25 usec  
 PLW1 15.00000000 W

==== CHANNEL f2 =====  
 SFO2 400.1316005 MHz  
 NUC2 1H  
 CPDPRG[2] waltz16  
 PCPD2 90.00 usec  
 PLW2 10.00000000 W  
 PLW12 0.31604999 W  
 PLW13 0.25600001 W

F2 - Processing parameters  
 SI 32768  
 SF 161.9755930 MHz  
 WDW EM  
 SSB 0  
 LB 1.00 Hz  
 GB 0  
 PC 1.40

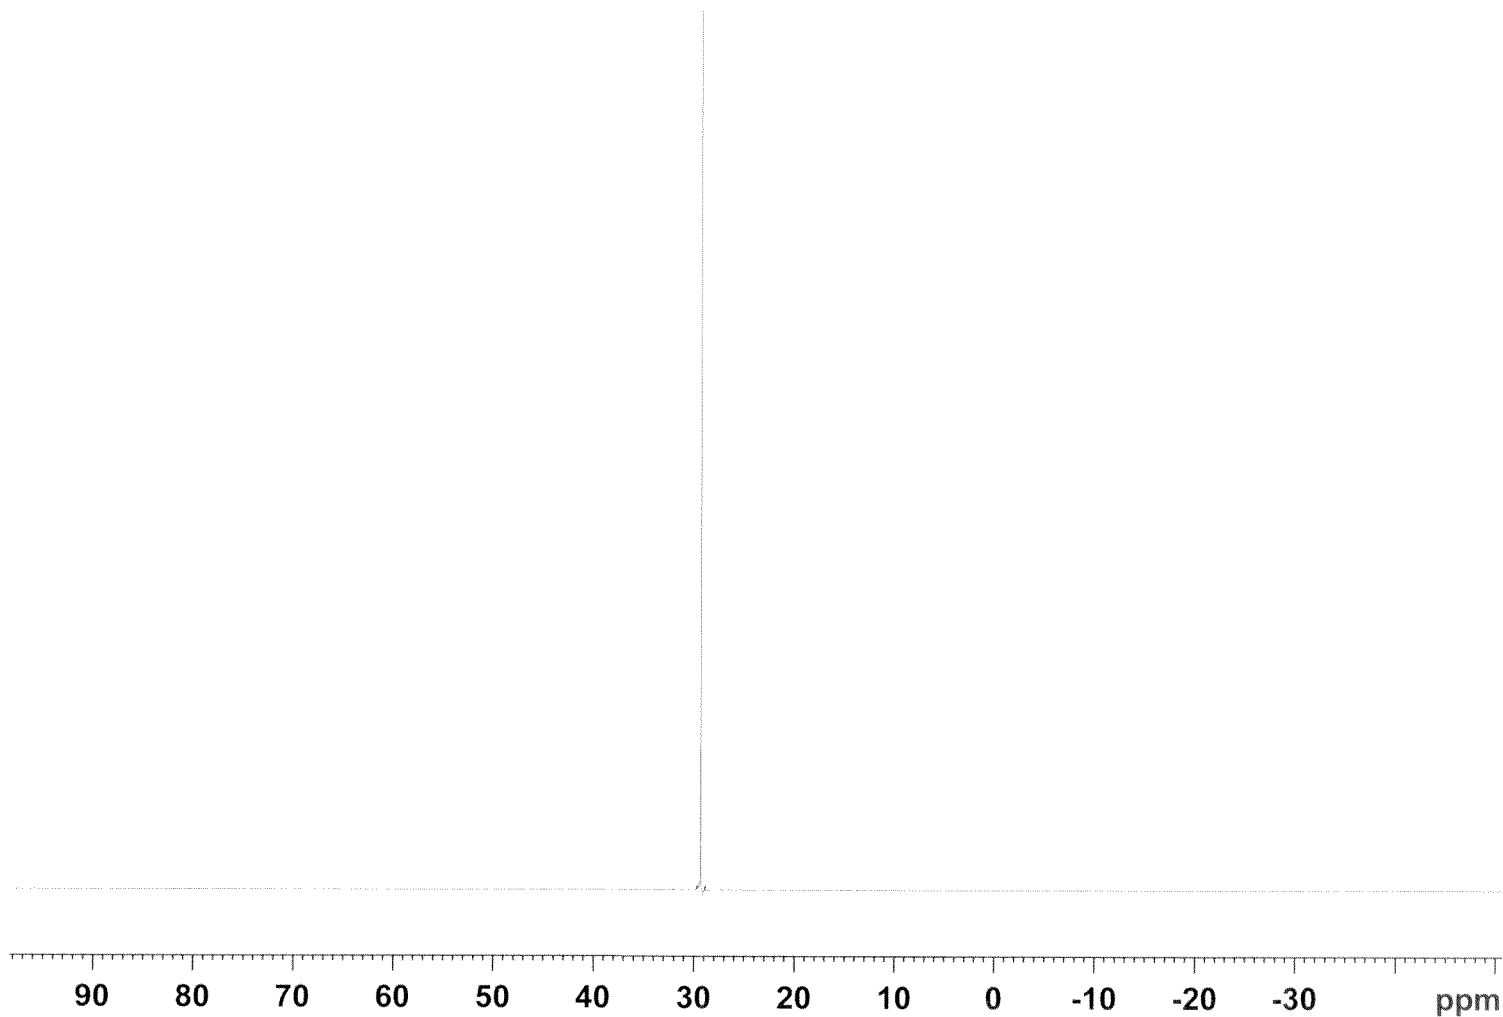

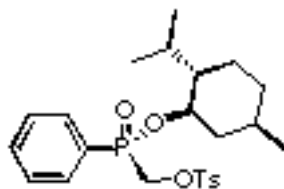

Compound (Sp)-26  
<sup>31</sup>P/<sup>1</sup>H NMR coupled

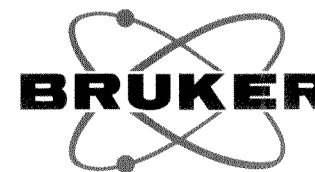

Current Data Parameters  
 NAME OB 648 2nd  
 EXPNO 2  
 PROCNO 1

F2 - Acquisition Parameters  
 Date\_ 20151119  
 Time\_ 9.48  
 INSTRUM spect  
 PROBHD 5 mm PABBO BB/  
 PULPROG zg30  
 TD 65536  
 SOLVENT CDC13  
 NS 32  
 DS 4  
 SWH 64102.563 Hz  
 FIDRES 0.978127 Hz  
 AQ 0.5111808 sec  
 RG 203.57  
 DW 7.800 usec  
 DE 6.50 usec  
 TE 295.2 K  
 D1 2.00000000 sec  
 TD0 1

==== CHANNEL f1 =====  
 SFO1 161.9674942 MHz  
 NUC1 31P  
 P1 14.25 usec  
 PLW1 15.00000000 W

F2 - Processing parameters  
 SI 32768  
 SF 161.9755930 MHz  
 WDW EM  
 SSB 0  
 LB 1.00 Hz  
 GB 0  
 PC 1.40

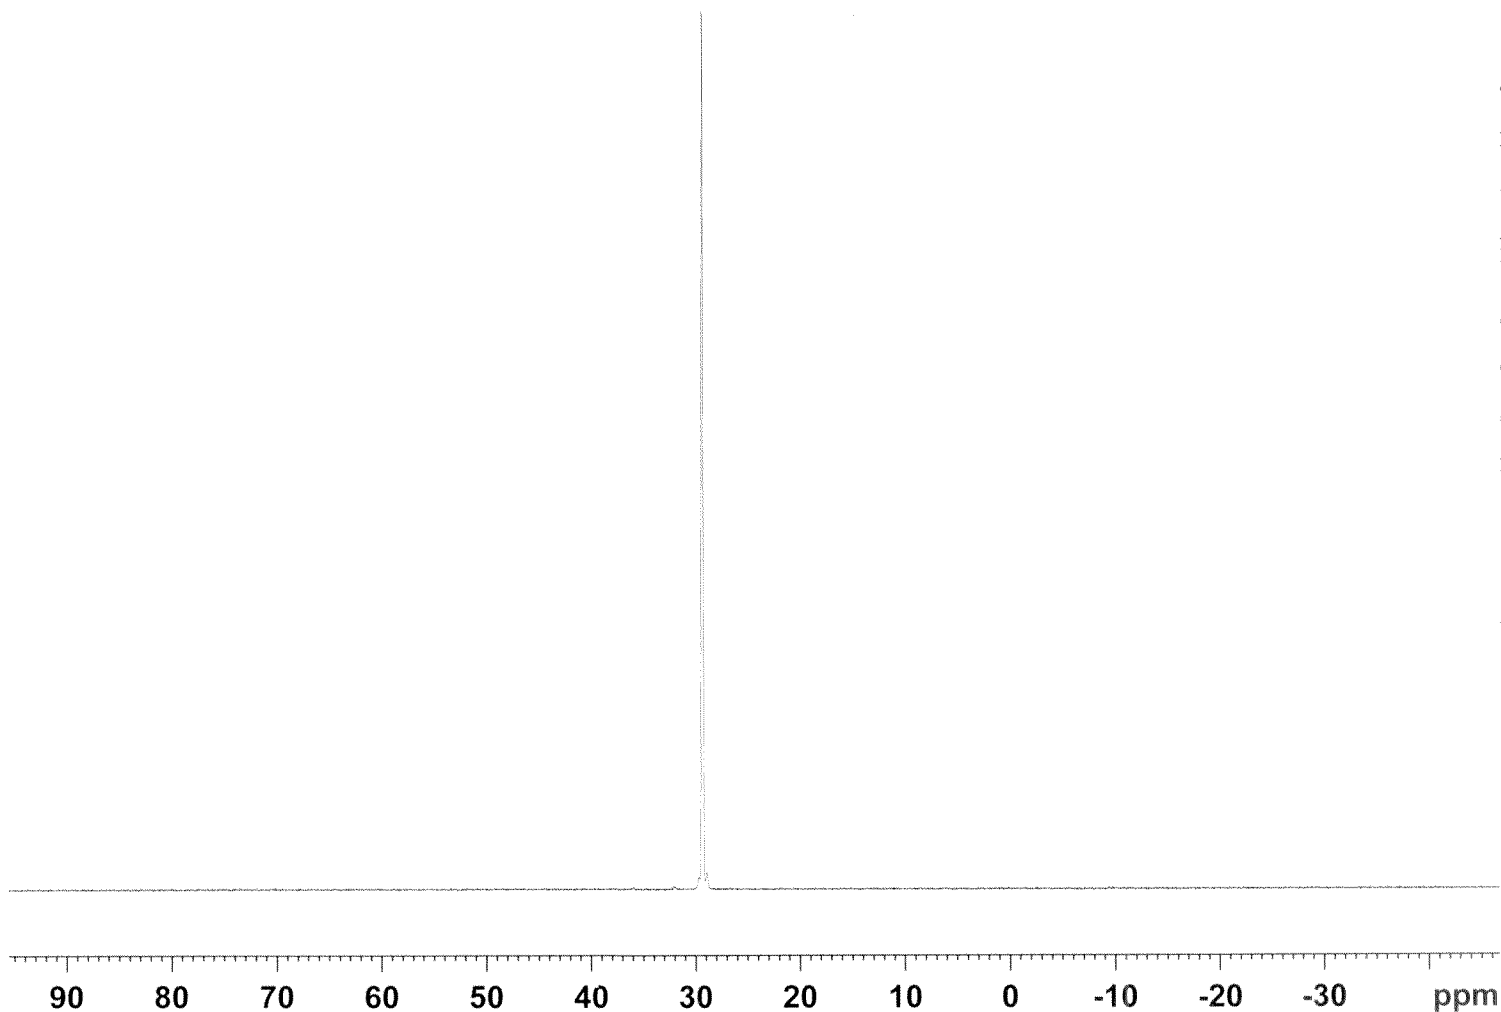

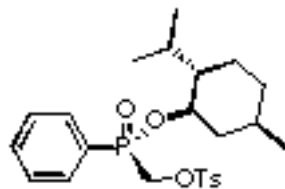

Compound (S<sub>p</sub>)-26  
<sup>1</sup>H NMR

Current Data Parameters  
 NAME OB 648 2nd  
 EXPNO 3  
 PROCNO 1

F2 - Acquisition Parameters  
 Date\_ 20151119  
 Time 9.50  
 INSTRUM spect  
 PROBHD 5 mm PABBO BB/  
 PULPROG zg30  
 TD 65536  
 SOLVENT CDCl3  
 NS 16  
 DS 2  
 SWH 8012.820 Hz  
 FIDRES 0.122266 Hz  
 AQ 4.0894465 sec  
 RG 12.96  
 DW 62.400 usec  
 DE 6.50 usec  
 TE 295.2 K  
 D1 1.00000000 sec  
 TDO 1

==== CHANNEL f1 =====  
 SFO1 400.1324710 MHz  
 NUC1 1H  
 P1 10.00 usec  
 PLW1 25.00300026 W

F2 - Processing parameters  
 SI 65536  
 SF 400.130000 MHz  
 WDW EM  
 SSB 0  
 LB 0.30 Hz  
 GB 0  
 PC 1.00

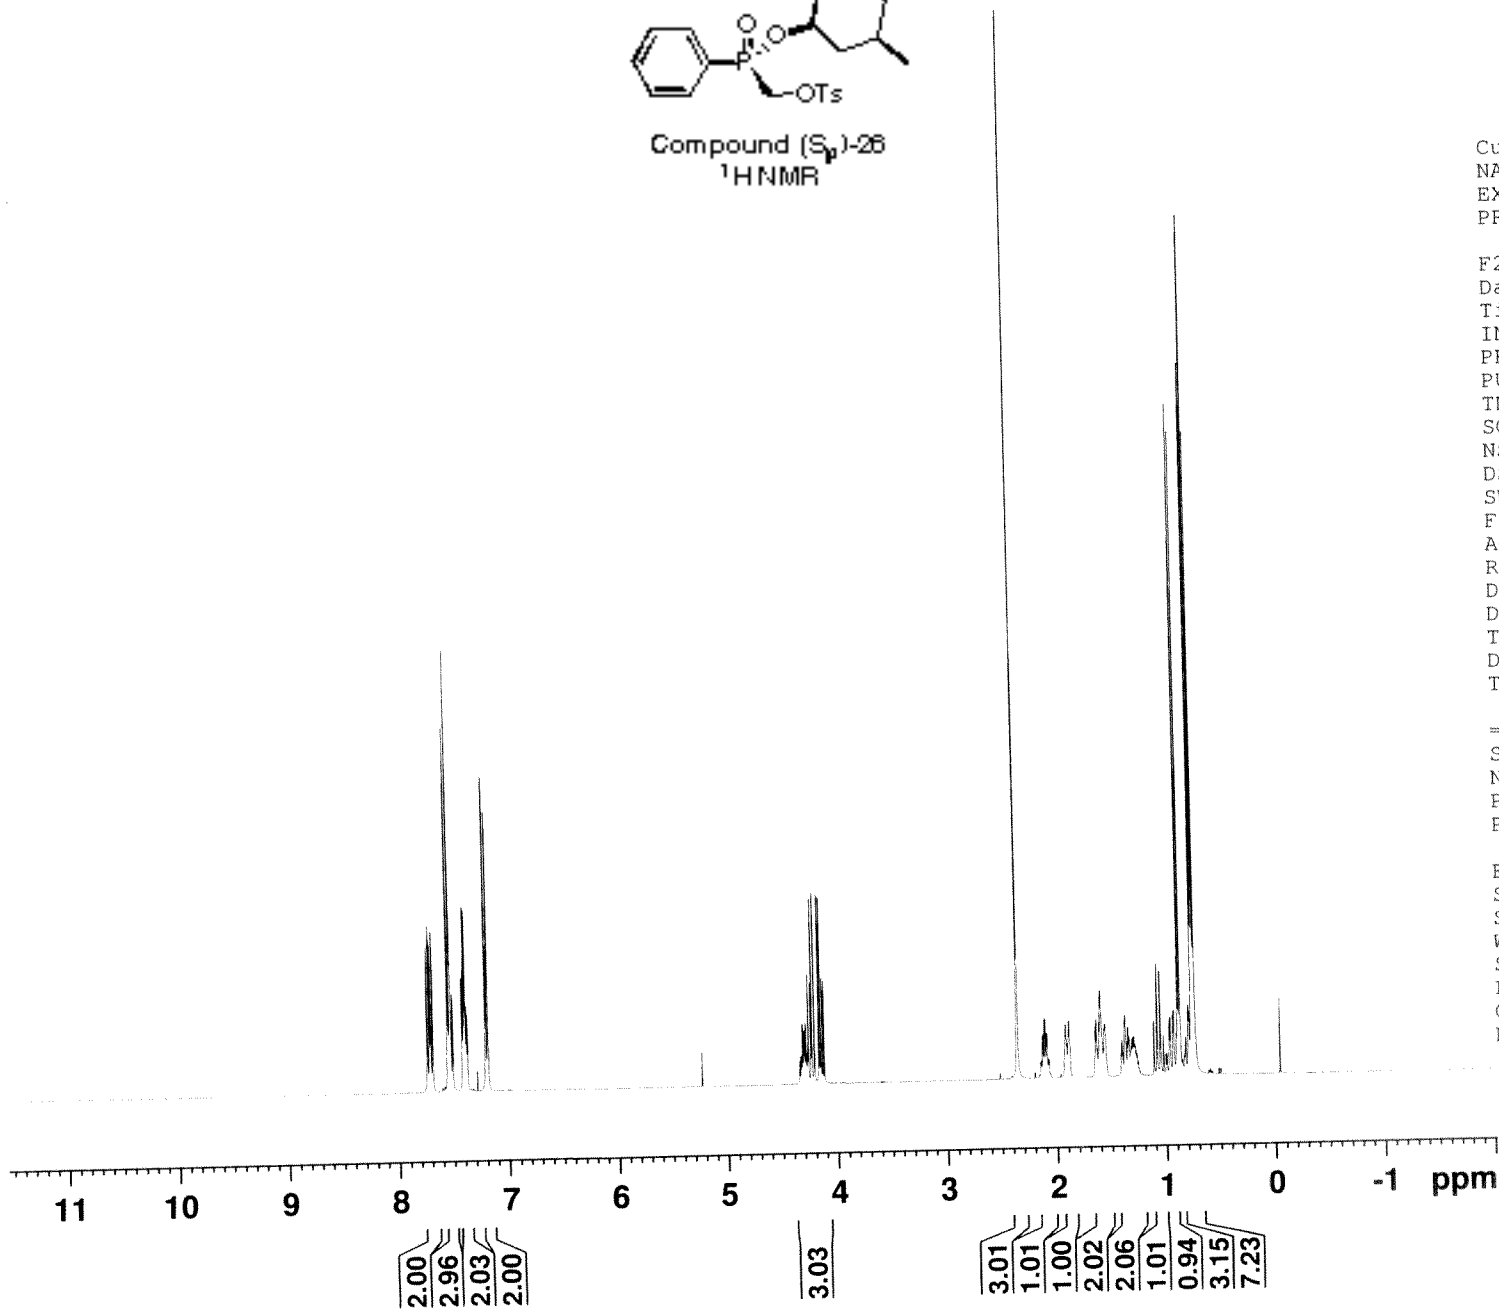

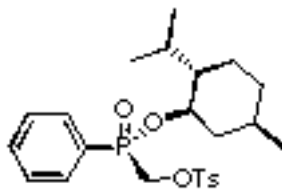

Compound (S<sub>p</sub>)-28  
<sup>13</sup>C NMR

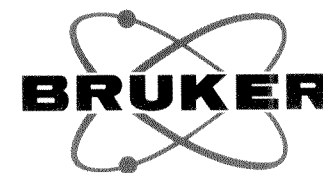

Current Data Parameters  
 NAME OB 648 2nd  
 EXPNO 4  
 PROCNO 1

F2 - Acquisition Parameters  
 Date\_ 20151119  
 Time 10.09  
 INSTRUM spect  
 PROBHD 5 mm PABBO BB/  
 PULPROG zgpg30  
 TD 65536  
 SOLVENT CDCl3  
 NS 298  
 DS 4  
 SWH 24038.461 Hz  
 FIDRES 0.366798 Hz  
 AQ 1.3631488 sec  
 RG 203.57  
 DW 20.800 usec  
 DE 6.50 usec  
 TE 295.1 K  
 D1 2.0000000 sec  
 D11 0.0300000 sec  
 TDO 1

==== CHANNEL f1 =====  
 SFO1 100.6228293 MHz  
 NUC1 13C  
 P1 10.00 usec  
 PLW1 45.0000000 W

==== CHANNEL f2 =====  
 SFO2 400.1316005 MHz  
 NUC2 1H  
 CPDPRG[2] waltz16  
 PCPD2 90.00 usec  
 PLW2 10.0000000 W  
 PLW12 0.31604999 W  
 PLW13 0.25600001 W

F2 - Processing parameters  
 SI 32768  
 SF 100.6127685 MHz  
 WDW EM  
 SSB 0  
 LB 1.00 Hz  
 GB 0  
 PC 1.40

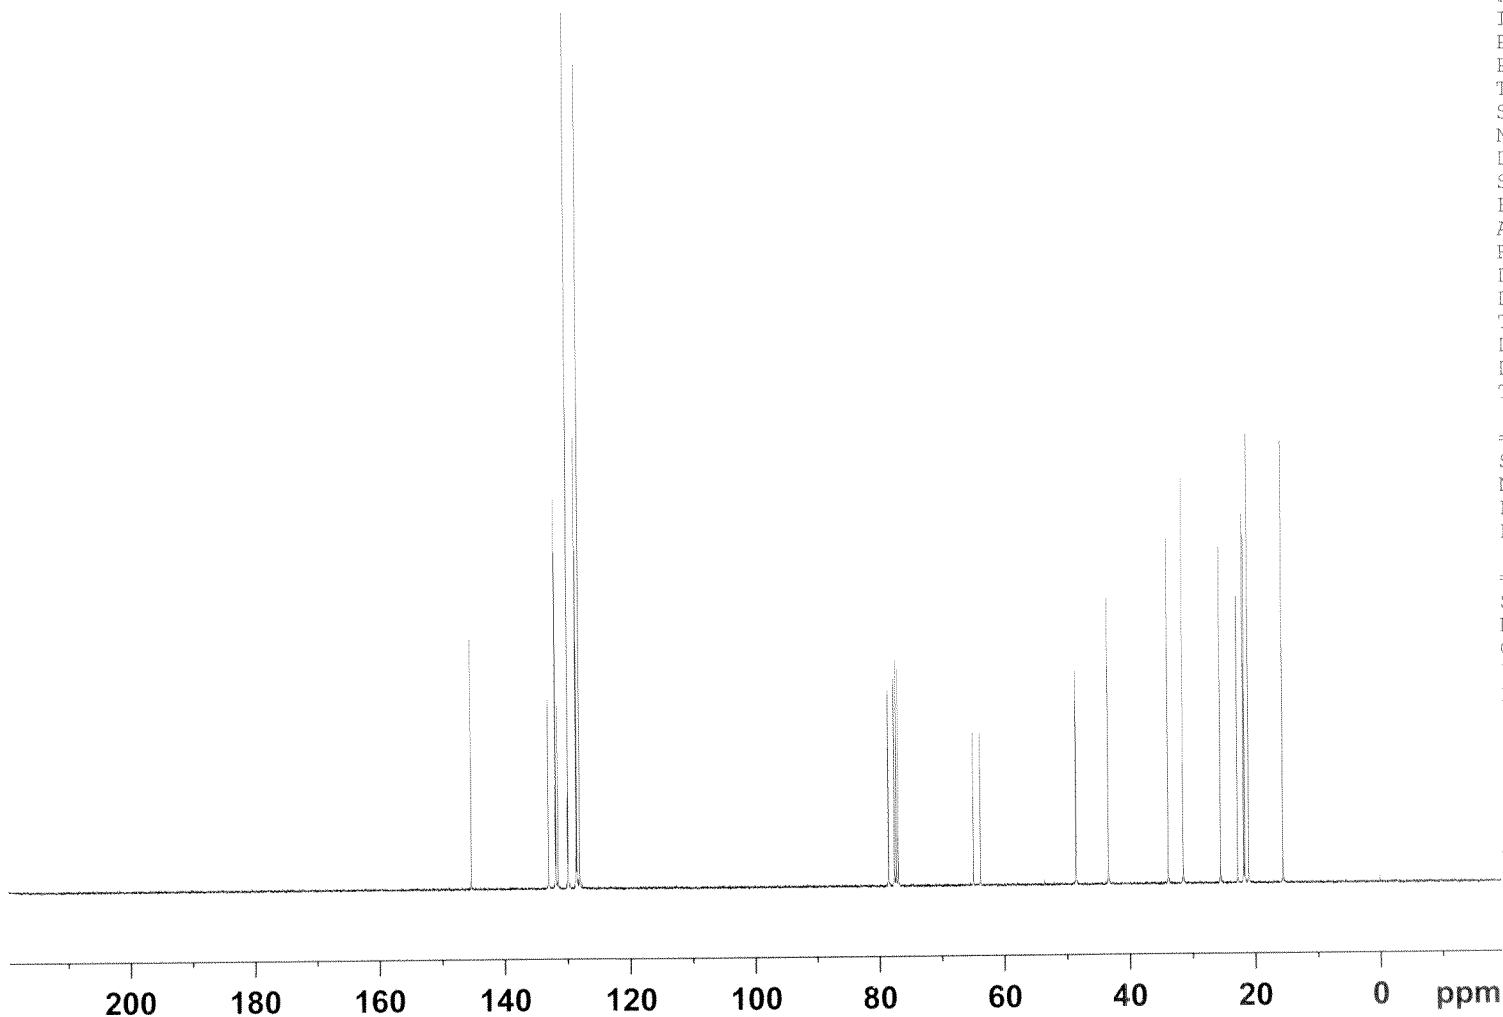

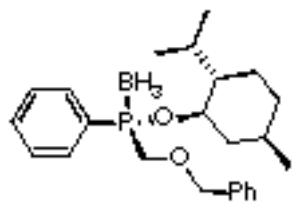

Compound (S<sub>p</sub>)-27  
<sup>31</sup>P/<sup>1</sup>H NMR decoupled

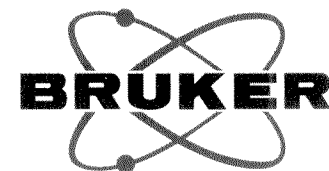

Current Data Parameters  
 NAME OB 1707 after column  
 EXPNO 1  
 PROCNO 1

F2 - Acquisition Parameters  
 Date\_ 20140911  
 Time\_ 17.17  
 INSTRUM spect  
 PROBHD 5 mm PABBO BB/  
 PULPROG zgpg30  
 TD 65536  
 SOLVENT CDCl3  
 NS 16  
 DS 4  
 SWH 64102.563 Hz  
 FIDRES 0.978127 Hz  
 AQ 0.5111808 sec  
 RG 203.57  
 DW 7.800 usec  
 DE 6.50 usec  
 TE 294.8 K  
 D1 2.00000000 sec  
 D11 0.03000000 sec  
 TD0 1

===== CHANNEL f1 =====  
 SFO1 161.9674942 MHz  
 NUC1 31P  
 P1 14.25 usec  
 PLW1 15.00000000 W

===== CHANNEL f2 =====  
 SFO2 400.1316005 MHz  
 NUC2 1H  
 CPDPRG[2] waltz16  
 PCPD2 90.00 usec  
 PLW2 10.00000000 W  
 PLW12 0.31604999 W  
 PLW13 0.25600001 W

F2 - Processing parameters  
 SI 32768  
 SF 161.9755930 MHz  
 WDW EM  
 SSB 0  
 LB 1.00 Hz  
 GB 0  
 PC 1.40

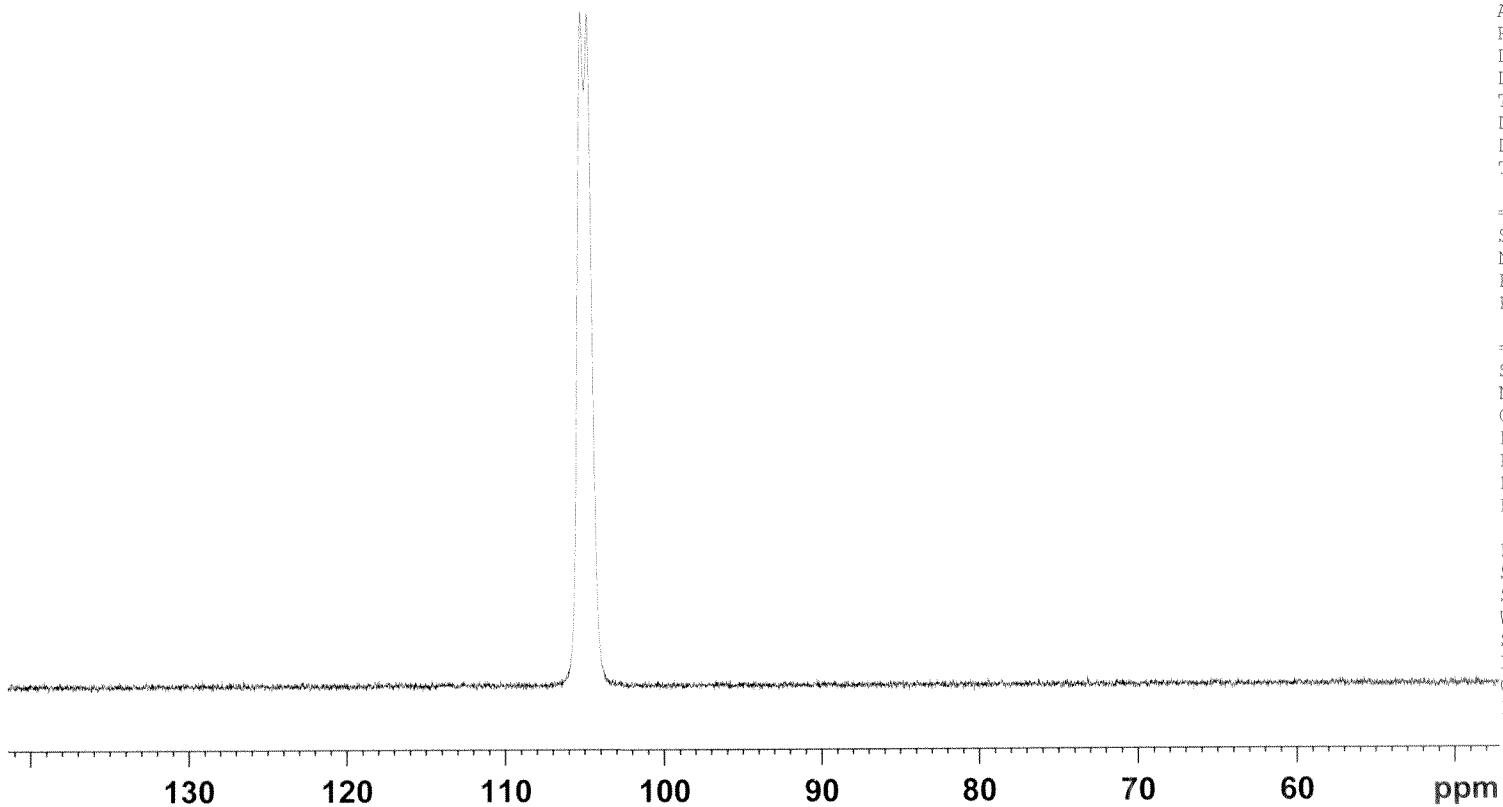

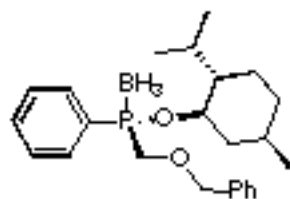

Compound (S<sub>p</sub>)-27  
<sup>31</sup>P/<sup>1</sup>H NMR coupled

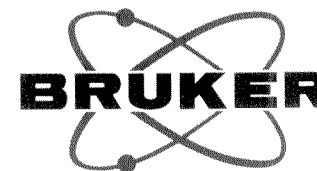

Current Data Parameters  
 NAME OB 1707 after column  
 EXPNO 2  
 PROCNO 1

F2 - Acquisition Parameters  
 Date\_ 20140911  
 Time 17.20  
 INSTRUM spect  
 PROBHD 5 mm PABBO BB/  
 PULPROG zg30  
 TD 65536  
 SOLVENT CDC13  
 NS 32  
 DS 4  
 SWH 64102.563 Hz  
 FIDRES 0.978127 Hz  
 AQ 0.5111808 sec  
 RG 203.57  
 DW 7.800 usec  
 DE 6.50 usec  
 TE 294.5 K  
 D1 2.00000000 sec  
 TD0 1

==== CHANNEL f1 =====  
 SF01 161.9674942 MHz  
 NUC1 31P  
 P1 14.25 usec  
 PLW1 15.00000000 W

F2 - Processing parameters  
 SI 32768  
 SF 161.9755930 MHz  
 WDW EM  
 SSB 0  
 LB 1.00 Hz  
 GB 0  
 PC 1.40

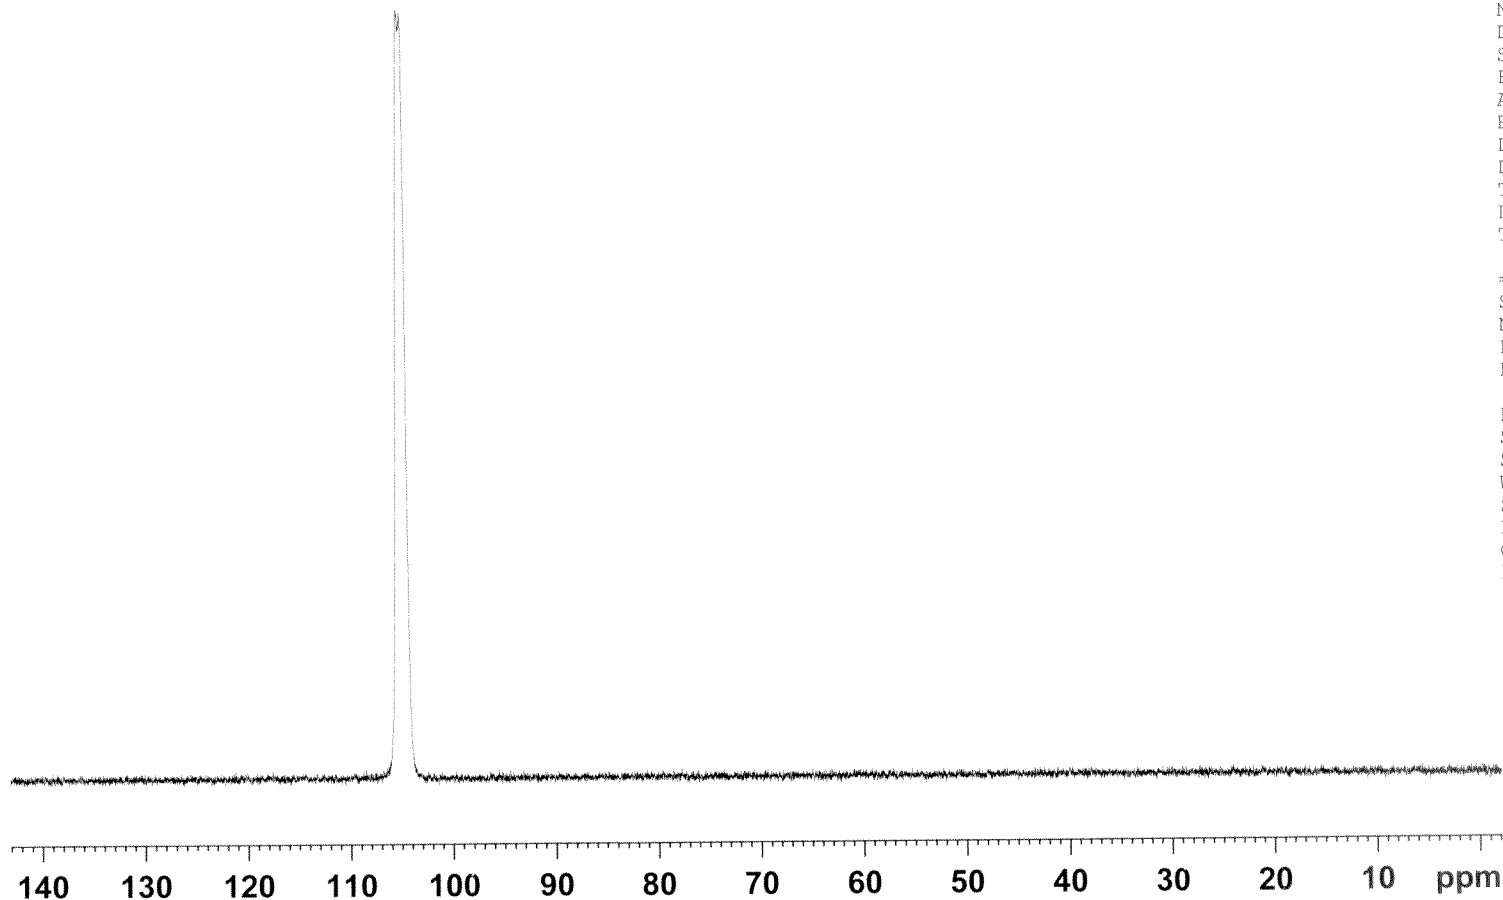

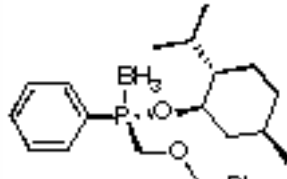

Compound (S<sub>R</sub>)-27  
<sup>1</sup>H NMR

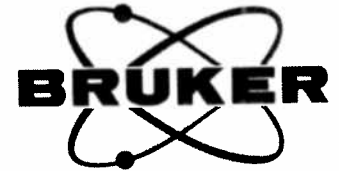

Current Data Parameters  
 NAME OB 1707 after column  
 EXPNO 3  
 PROCNO 1

F2 - Acquisition Parameters  
 Date\_ 20140911  
 Time 17.24  
 INSTRUM spect  
 PROBHD 5 mm PABBO BB/  
 PULPROG zg30  
 TD 65536  
 SOLVENT CDC13  
 NS 11  
 DS 2  
 SWH 8012.820 Hz  
 FIDRES 0.122266 Hz  
 AQ 4.0894465 sec  
 RG 10.22  
 DW 62.400 usec  
 DE 6.50 usec  
 TE 294.6 K  
 D1 1.0000000 sec  
 TDO 1

===== CHANNEL f1 =====  
 SFO1 400.1324710 MHz  
 NUC1 1H  
 P1 10.00 usec  
 PLW1 25.00300026 W

F2 - Processing parameters  
 SI 65536  
 SF 400.1300000 MHz  
 WDW EM  
 SSB 0  
 LB 0.30 Hz  
 GB 0  
 PC 1.00

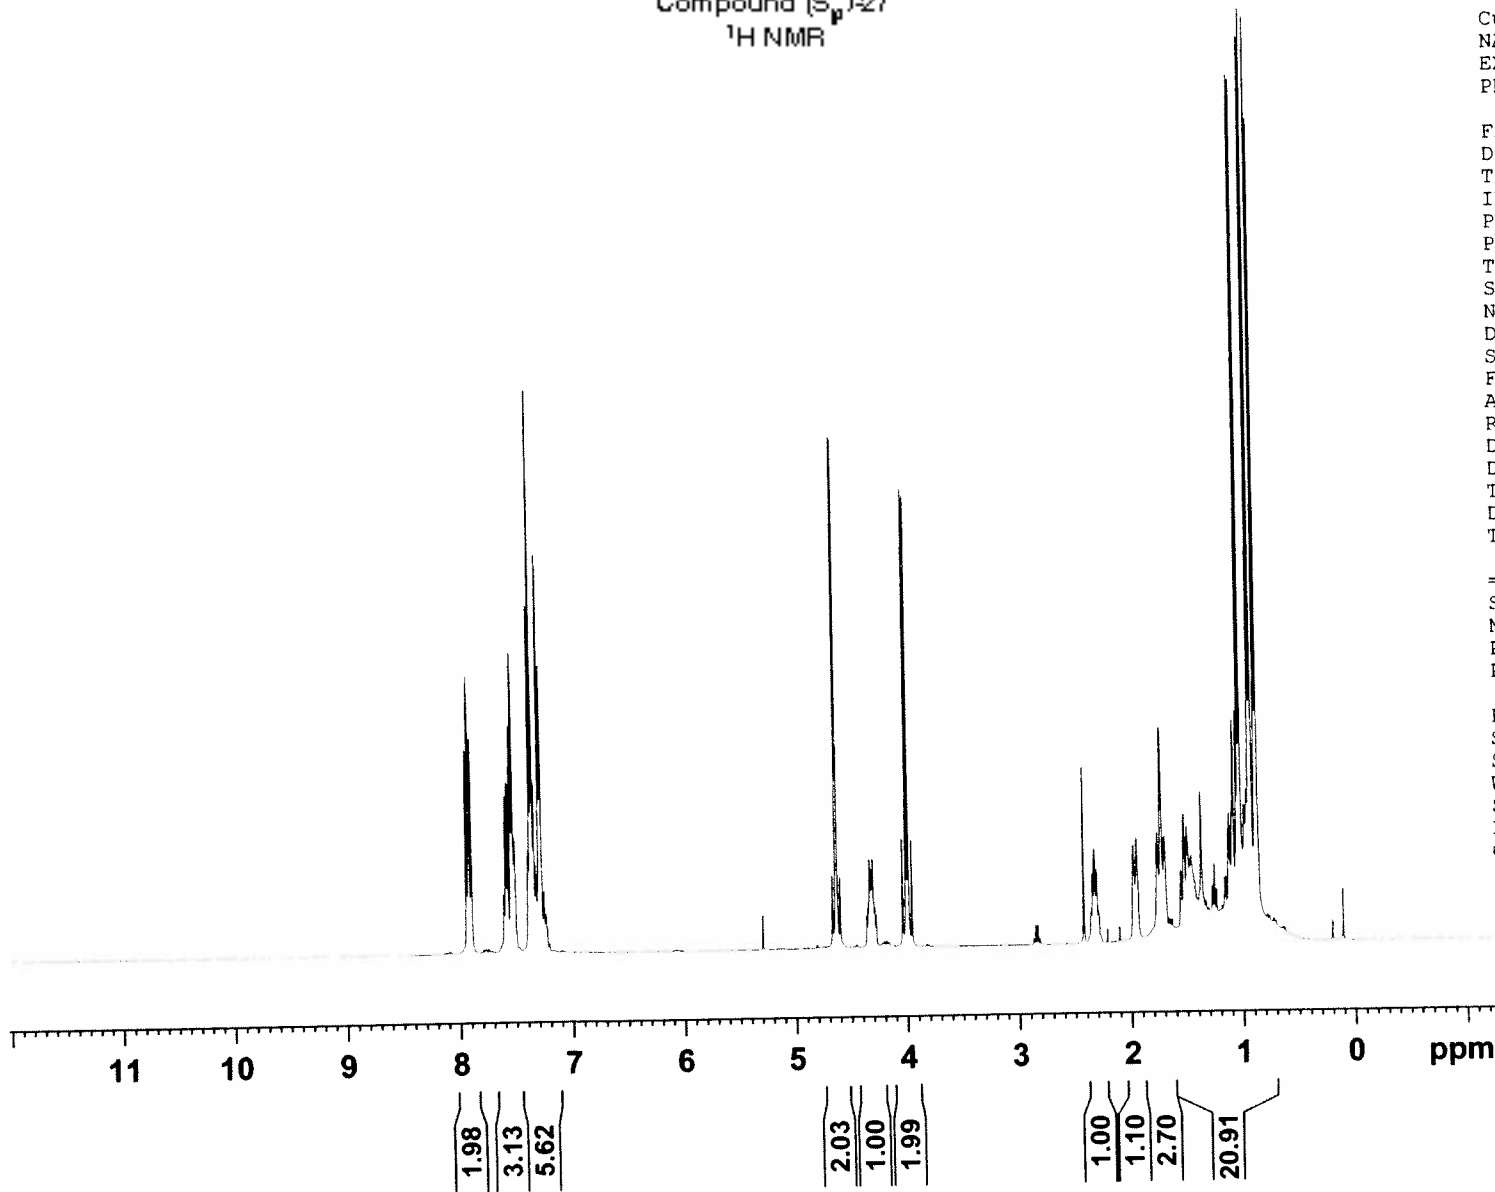

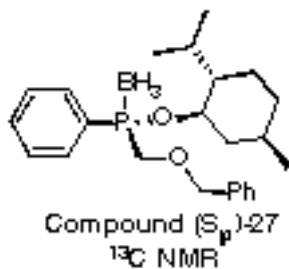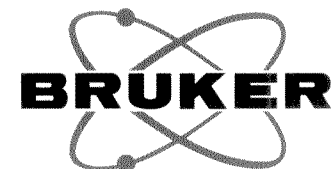

Current Data Parameters  
 NAME OB1707 pure  
 EXPNO 4  
 PROCNO 1

F2 - Acquisition Parameters  
 Date\_ 20141215  
 Time\_ 18.54  
 INSTRUM spect  
 PROBHD 5 mm PABBO BB/  
 PULPROG zgpg30  
 TD 65536  
 SOLVENT CDC13  
 NS 773  
 DS 4  
 SWH 24038.461 Hz  
 FIDRES 0.366798 Hz  
 AQ 1.3631488 sec  
 RG 203.57  
 DW 20.800 usec  
 DE 6.50 usec  
 TE 296.7 K  
 D1 2.0000000 sec  
 D11 0.0300000 sec  
 TD0 1

==== CHANNEL f1 =====  
 SFO1 100.6228293 MHz  
 NUC1 13C  
 P1 10.00 usec  
 PLW1 45.0000000 W

==== CHANNEL f2 =====  
 SFO2 400.1316005 MHz  
 NUC2 1H  
 CPDPRG[2] waltz16  
 PCPD2 90.00 usec  
 PLW2 10.0000000 W  
 PLW12 0.31604999 W  
 PLW13 0.25600001 W

F2 - Processing parameters  
 SI 32768  
 SF 100.6127685 MHz  
 WDW EM  
 SSB 0  
 LB 1.00 Hz  
 GB 0  
 PC 1.40

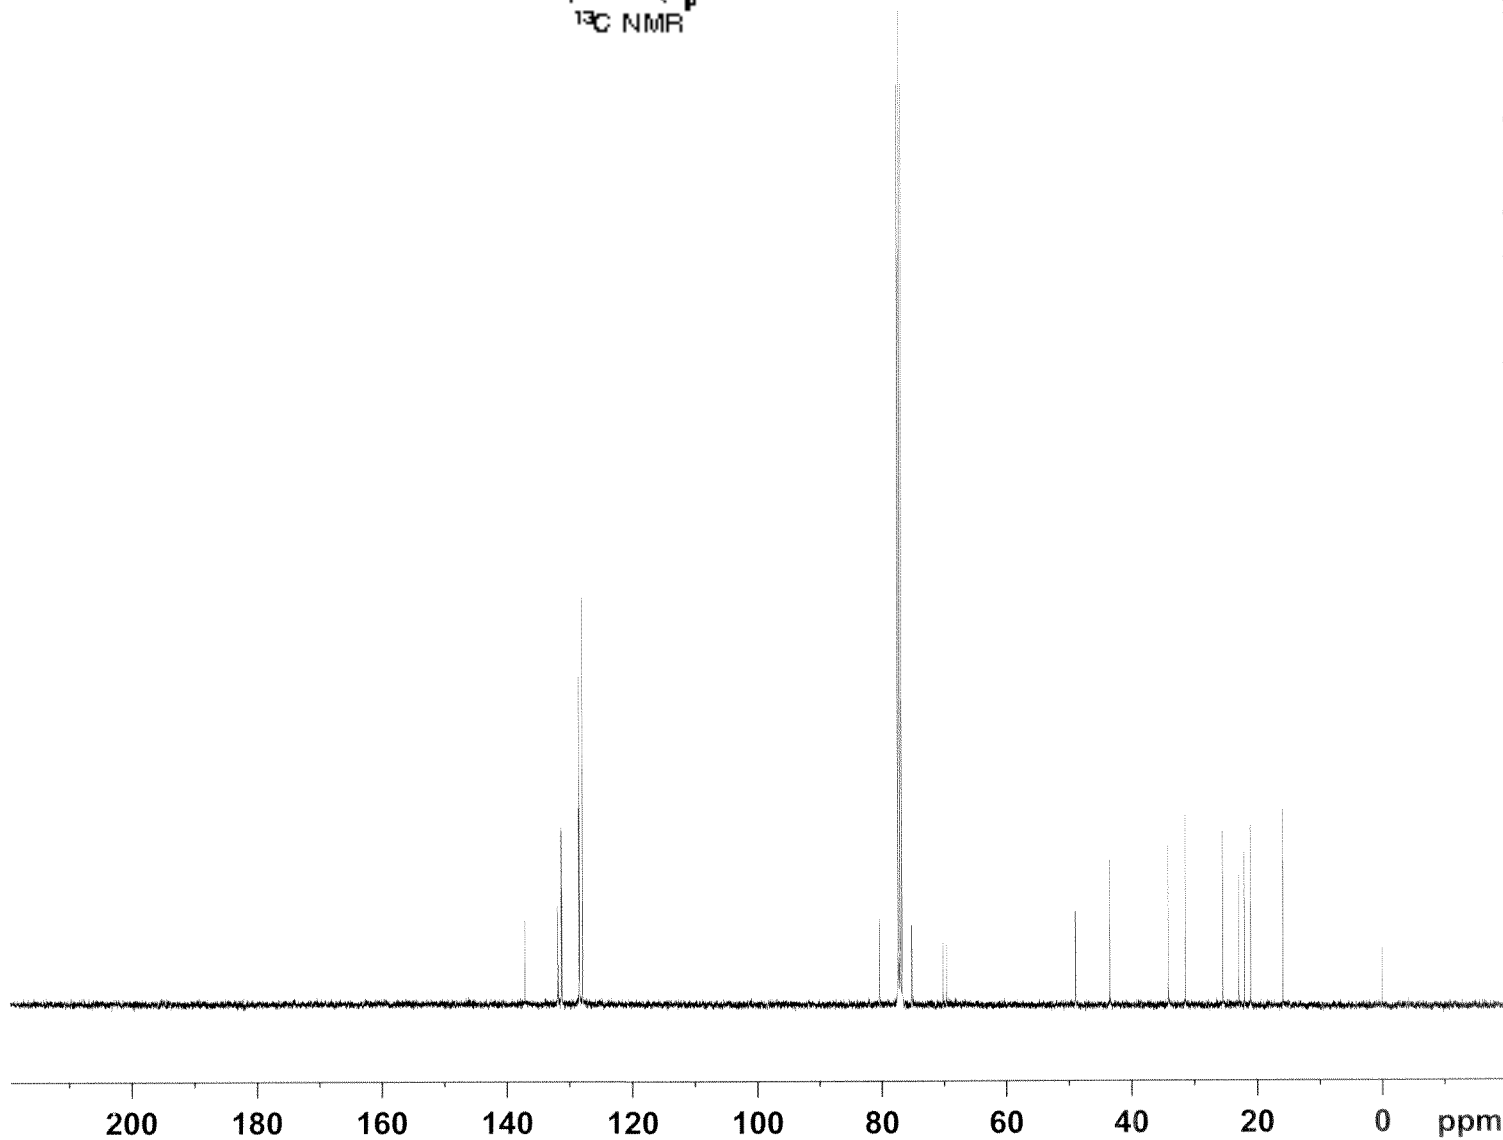



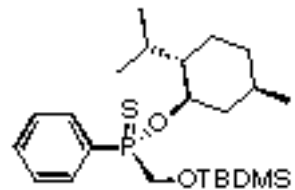

Compound (Rp)-28a  
<sup>31</sup>P/<sup>1</sup>H NMR decoupled

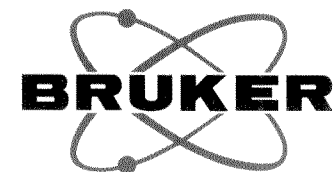

Current Data Parameters  
 NAME OB 1588 pure2  
 EXPNO 1  
 PROCNO 1

F2 - Acquisition Parameters  
 Date\_ 20151124  
 Time 11.00  
 INSTRUM spect  
 PROBHD 5 mm PABBO BB/  
 PULPROG zgpg30  
 TD 65536  
 SOLVENT CDCl3  
 NS 16  
 DS 4  
 SWH 64102.563 Hz  
 FIDRES 0.978127 Hz  
 AQ 0.5111808 sec  
 RG 203.57  
 DW 7.800 usec  
 DE 6.50 usec  
 TE 292.2 K  
 D1 2.00000000 sec  
 D11 0.03000000 sec  
 TD0 1

==== CHANNEL f1 =====  
 SFO1 161.9674942 MHz  
 NUC1 31P  
 P1 14.25 usec  
 PLW1 15.00000000 W

==== CHANNEL f2 =====  
 SFO2 400.1316005 MHz  
 NUC2 1H  
 CPDPRG[2] waltz16  
 PCPD2 90.00 usec  
 PLW2 10.00000000 W  
 PLW12 0.31604999 W  
 PLW13 0.25600001 W

F2 - Processing parameters  
 SI 32768  
 SF 161.9755930 MHz  
 WDW EM  
 SSB 0  
 LB 1.00 Hz  
 GB 0  
 PC 1.40

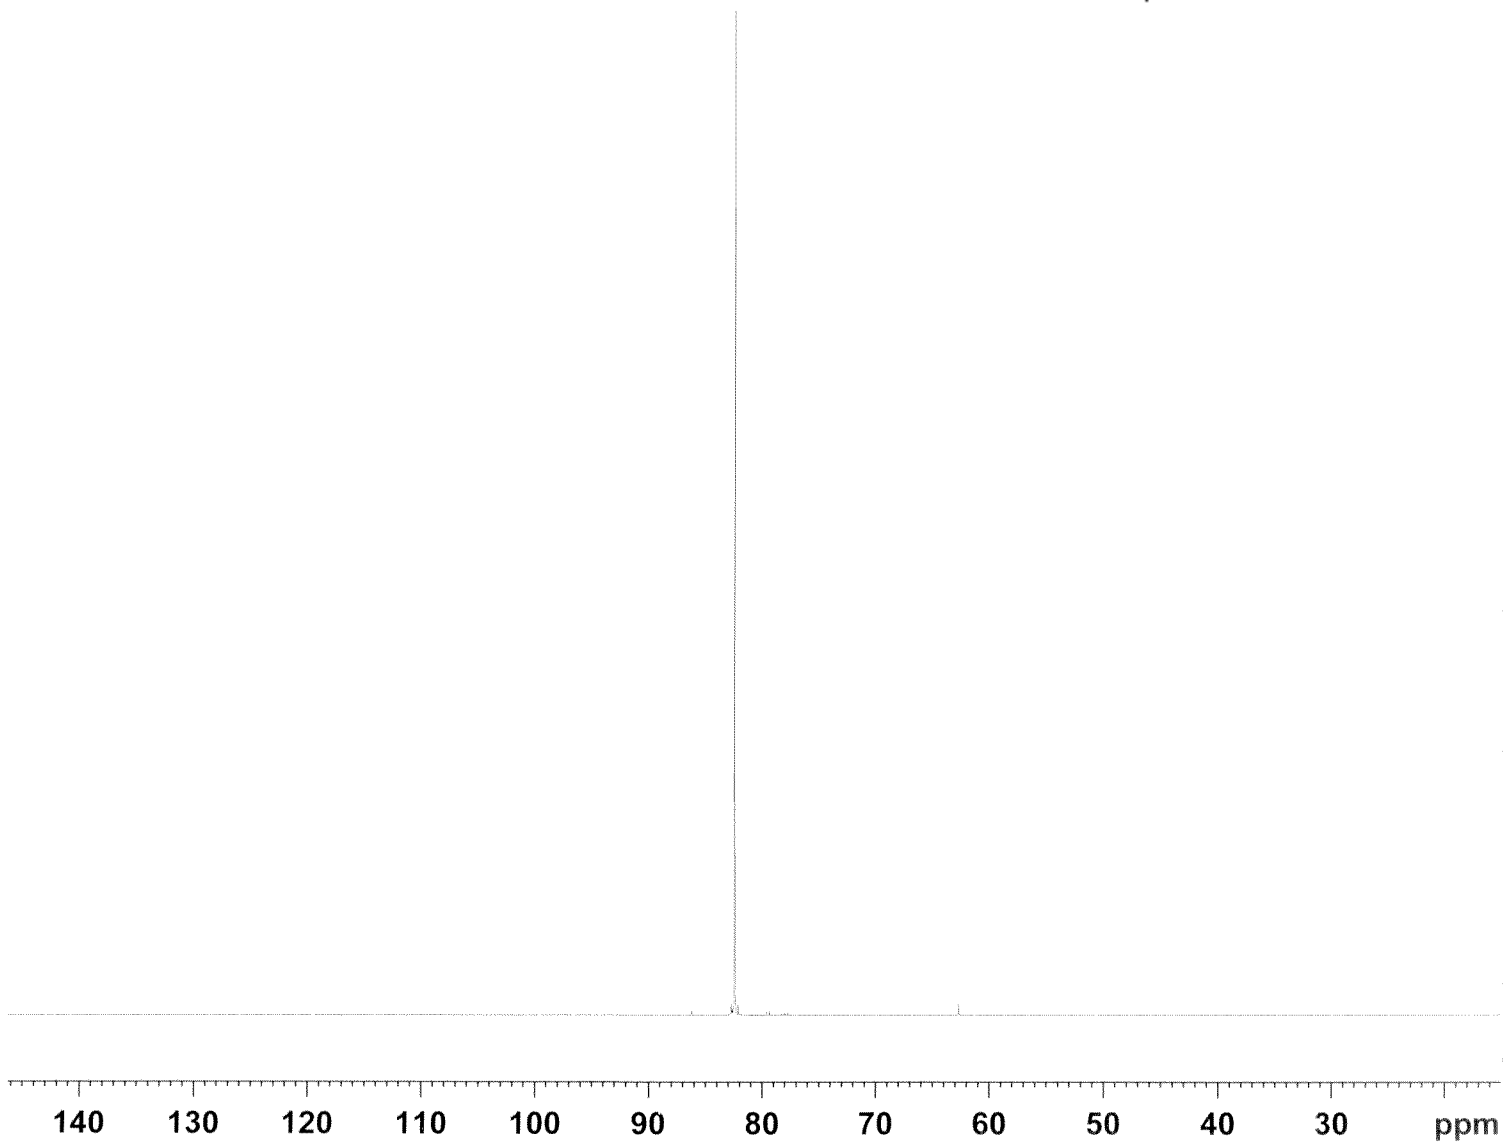

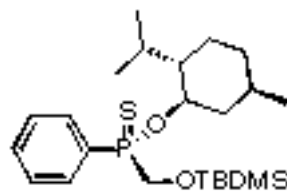

Compound (R<sub>p</sub>)-28a  
<sup>31</sup>P/<sup>1</sup>H NMR coupled

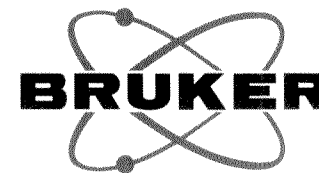

Current Data Parameters  
 NAME OB 1588 pure2  
 EXPNO 2  
 PROCNO 1

F2 - Acquisition Parameters

Date\_ 20151124  
 Time 11.02  
 INSTRUM spect  
 PROBHD 5 mm PABBO BB/  
 PULPROG zg30  
 TD 65536  
 SOLVENT CDCl3  
 NS 32  
 DS 4  
 SWH 64102.563 Hz  
 FIDRES 0.978127 Hz  
 AQ 0.5111808 sec  
 RG 203.57  
 DW 7.800 usec  
 DE 6.50 usec  
 TE 291.7 K  
 D1 2.00000000 sec  
 TD0 1

==== CHANNEL f1 =====  
 SF01 161.9674942 MHz  
 NUC1 31P  
 P1 14.25 usec  
 PLW1 15.00000000 W

F2 - Processing parameters  
 SI 32768  
 SF 161.9755930 MHz  
 WDW EM  
 SSB 0  
 LB 1.00 Hz  
 GB 0  
 PC 1.40

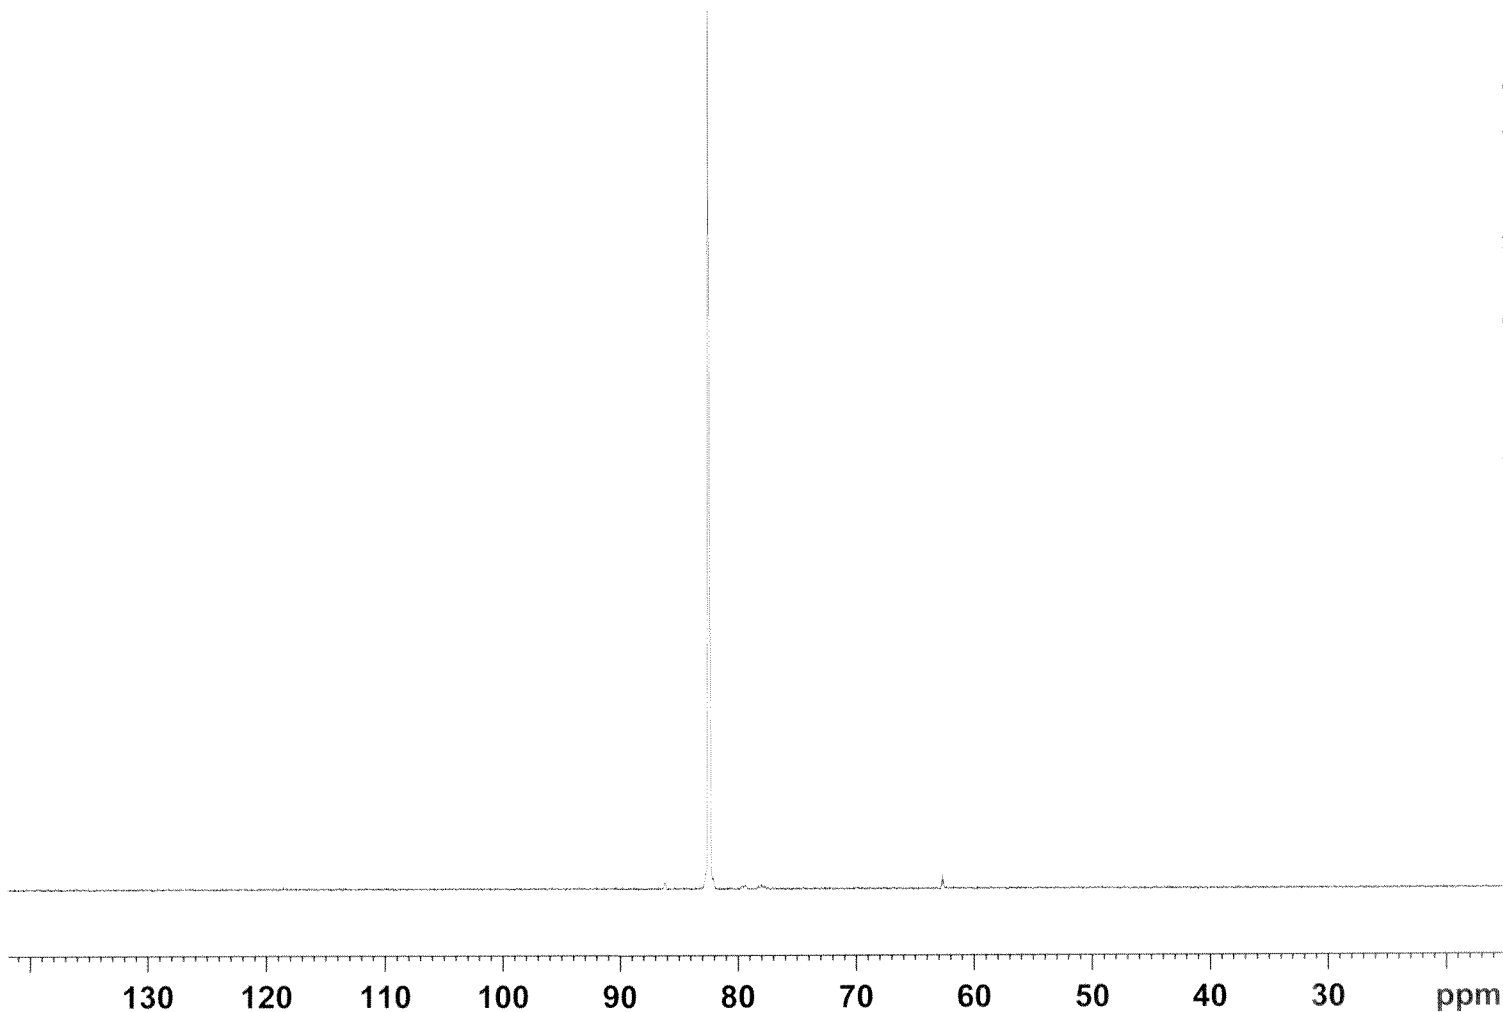

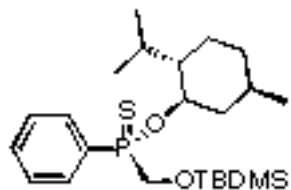

Compound (R<sub>p</sub>)-28a  
<sup>1</sup>H NMR

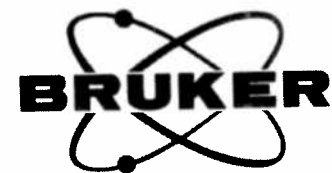

Current Data Parameters  
 NAME OB 1588 pure2  
 EXPNO 3  
 PROCNO 1

F2 - Acquisition Parameters  
 Date\_ 20151124  
 Time\_ 11.04  
 INSTRUM spect  
 PROBHD 5 mm PABBO BB/  
 PULPROG zg30  
 TD 65536  
 SOLVENT CDCl3  
 NS 16  
 DS 2  
 SWH 8012.820 Hz  
 FIDRES 0.122266 Hz  
 AQ 4.0894465 sec  
 RG 12.96  
 DW 62.400 usec  
 DE 6.50 usec  
 TE 291.7 K  
 D1 1.00000000 sec  
 TD0 1

==== CHANNEL f1 =====  
 SFO1 400.1324710 MHz  
 NUC1 1H  
 P1 10.00 usec  
 PLW1 25.00300026 W

F2 - Processing parameters  
 SI 65536  
 SF 400.1300000 MHz  
 WDW EM  
 SSB 0  
 LB 0.30 Hz  
 GB 0  
 PC 1.00

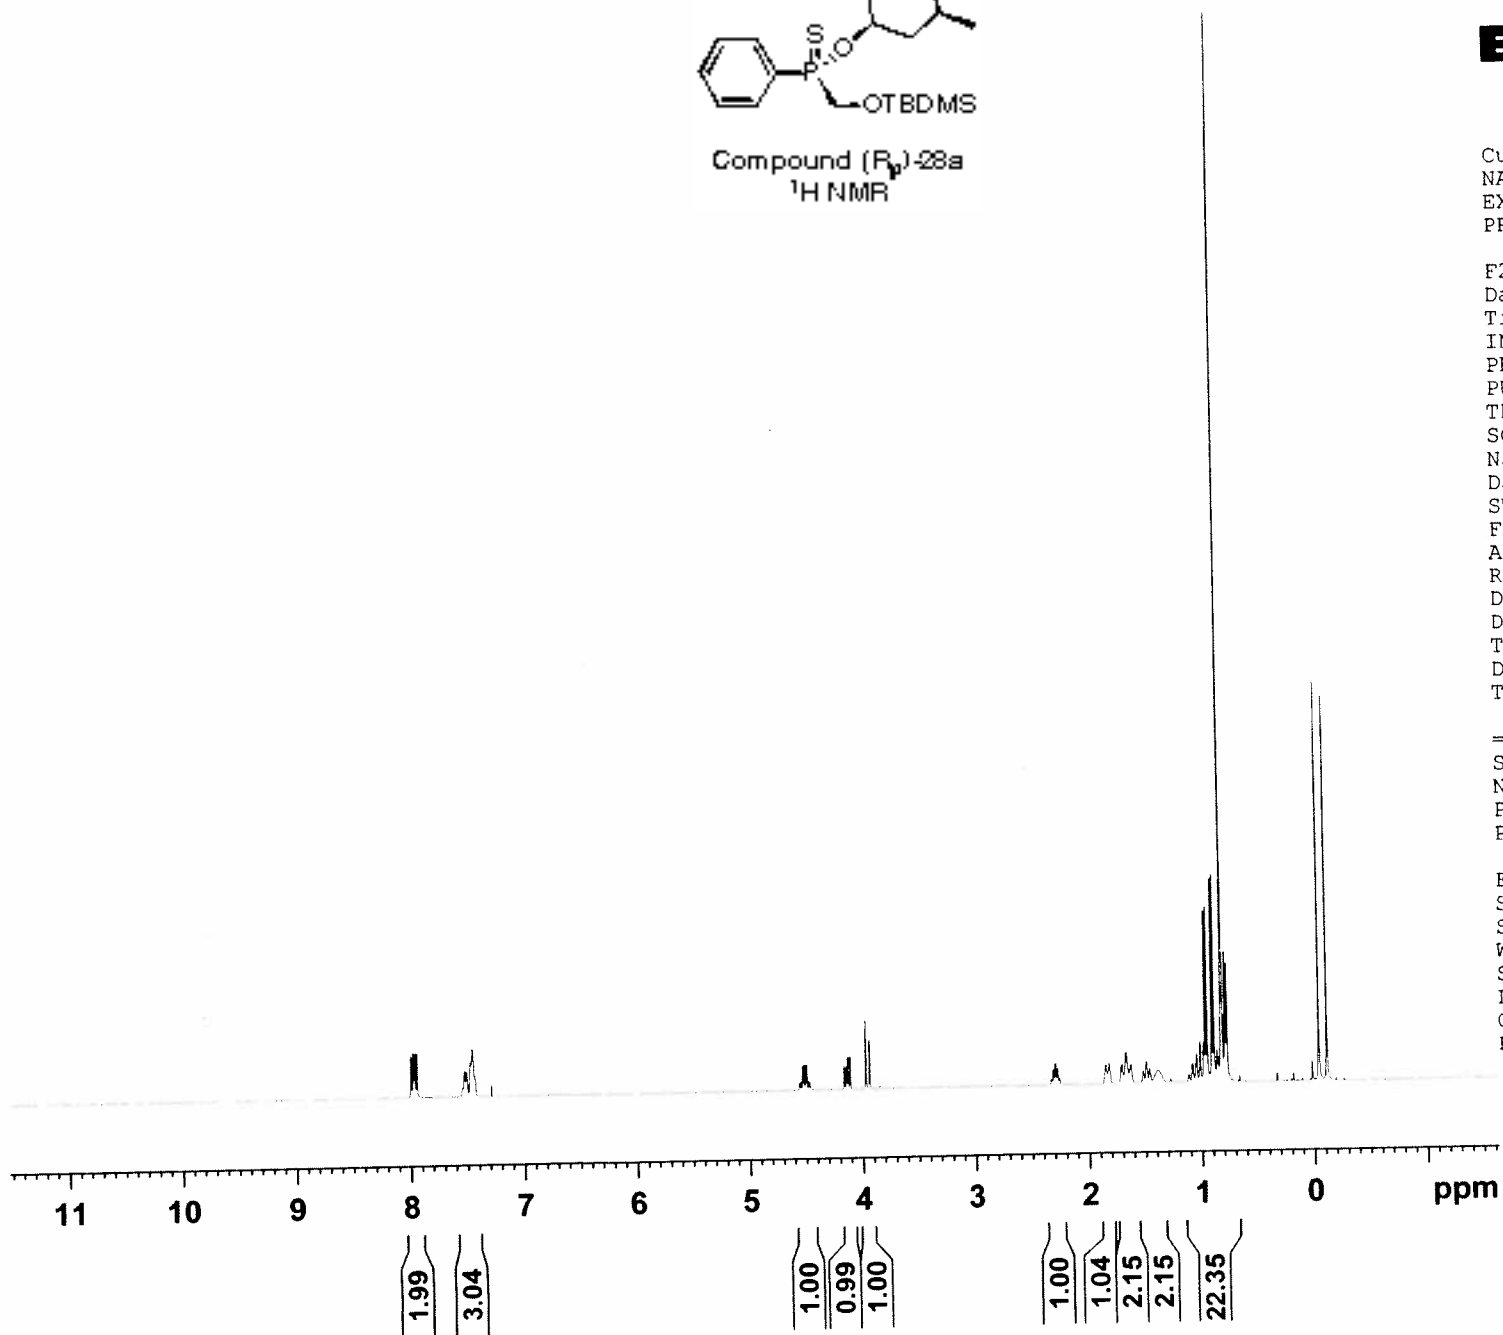

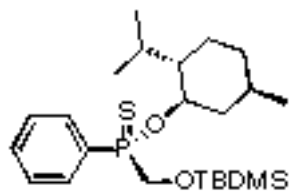

Compound (R<sub>p</sub>)-28a  
<sup>13</sup>C NMR

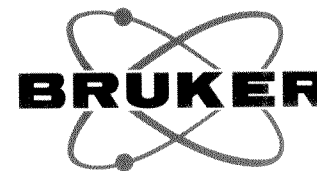

Current Data Parameters  
 NAME OB 1588 pure2  
 EXPNO 4  
 PROCNO 1

F2 - Acquisition Parameters  
 Date\_ 20151124  
 Time 11.26  
 INSTRUM spect  
 PROBHD 5 mm PABBO BB/  
 PULPROG zgpg30  
 TD 65536  
 SOLVENT CDCl3  
 NS 327  
 DS 4  
 SWH 24038.461 Hz  
 FIDRES 0.366798 Hz  
 AQ 1.3631488 sec  
 RG 203.57  
 DW 20.800 usec  
 DE 6.50 usec  
 TE 292.7 K  
 D1 2.0000000 sec  
 D11 0.0300000 sec  
 TD0 1

==== CHANNEL f1 =====  
 SFO1 100.6228293 MHz  
 NUC1 13C  
 P1 10.00 usec  
 PLW1 45.0000000 W

==== CHANNEL f2 =====  
 SFO2 400.1316005 MHz  
 NUC2 1H  
 CPDPRG[2] waltz16  
 PCPD2 90.00 usec  
 PLW2 10.0000000 W  
 PLW12 0.31604999 W  
 PLW13 0.25600001 W

F2 - Processing parameters  
 SI 32768  
 SF 100.6127685 MHz  
 WDW EM  
 SSB 0  
 LB 1.00 Hz  
 GB 0  
 PC 1.40

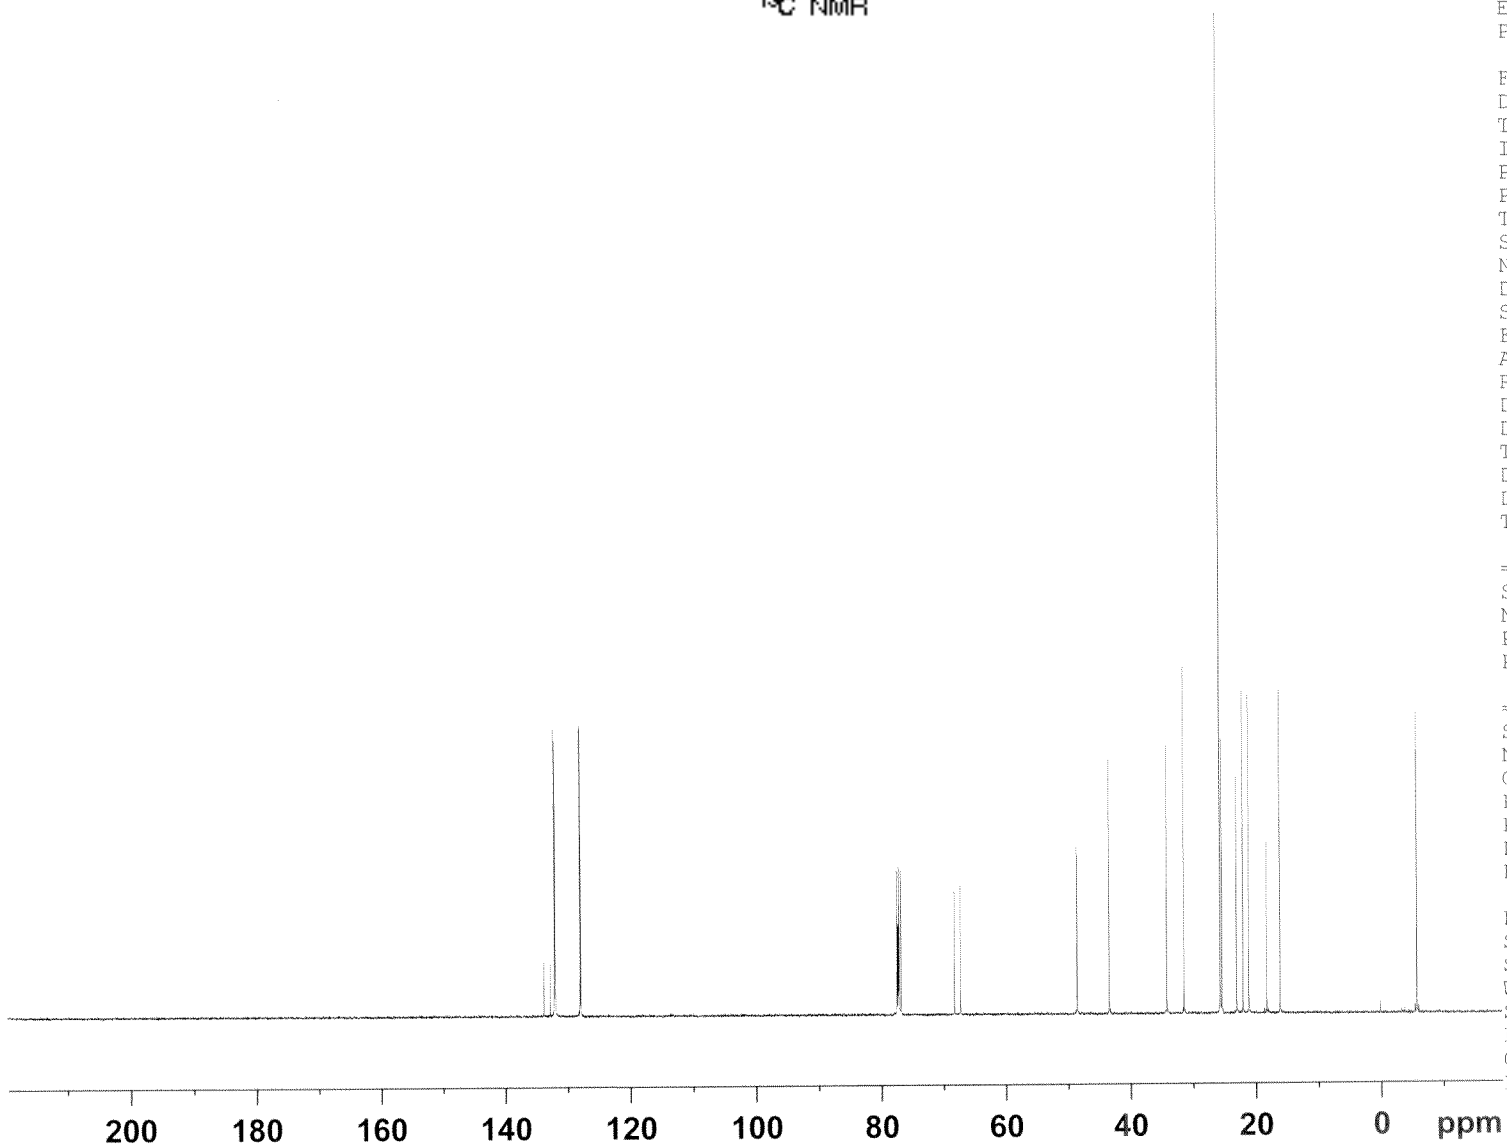

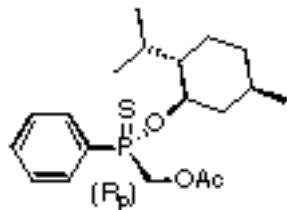

Compound (Rp)-28b  
<sup>31</sup>P/<sup>1</sup>H NMR decoupled

Current Data Parameters  
 NAME OB 1595 pure  
 EXPNO 1  
 PROCNO 1

F2 - Acquisition Parameters  
 Date\_ 20140723  
 Time 19.43  
 INSTRUM spect  
 PROBHD 5 mm PABBO BE/  
 PULPROG zgpg30  
 TD 65536  
 SOLVENT CDCl3  
 NS 16  
 DS 4  
 SWH 64102.563 Hz  
 FIDRES 0.978127 Hz  
 AQ 0.5111808 sec  
 RG 203.57  
 DW 7.800 usec  
 DE 6.50 usec  
 TE 295.3 K  
 D1 2.00000000 sec  
 D11 0.03000000 sec  
 TD0 1

==== CHANNEL f1 =====  
 SFO1 161.9674942 MHz  
 NUC1 31P  
 P1 14.25 usec  
 PLW1 15.00000000 W

==== CHANNEL f2 =====  
 SFO2 400.1316005 MHz  
 NUC2 1H  
 CPDPRG[2] waltz16  
 PCPD2 90.00 usec  
 PLW2 10.00000000 W  
 PLW12 0.31604999 W  
 PLW13 0.25600001 W

F2 - Processing parameters  
 SI 32768  
 SF 161.9755930 MHz  
 WDW EM  
 SSB 0  
 LB 1.00 Hz  
 GB 0  
 PC 1.40

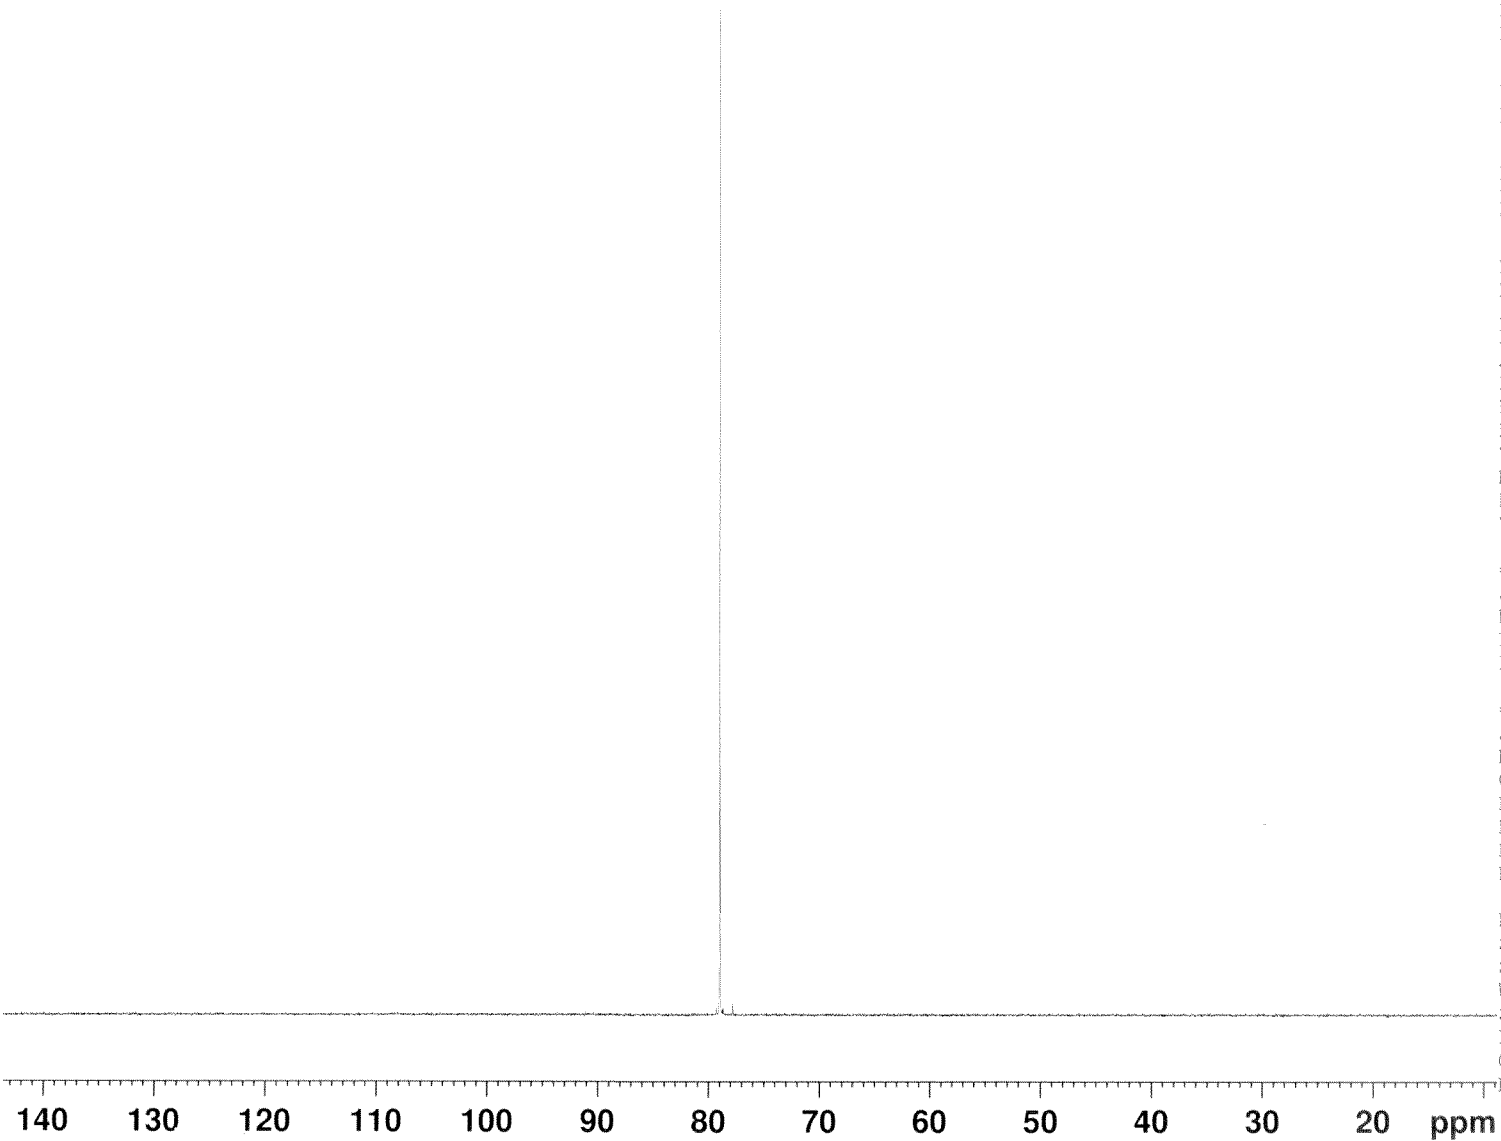

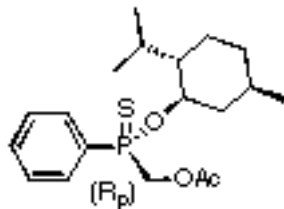

Compound (R<sub>p</sub>)-28b  
<sup>31</sup>P/<sup>1</sup>H NMR coupled

Current Data Parameters  
 NAME OB 1595 pure  
 EXPNO 2  
 PROCNO 1

F2 - Acquisition Parameters  
 Date\_ 20140723  
 Time 19.46  
 INSTRUM spect  
 PROBHD 5 mm PABBO BB/  
 PULPROG zg30  
 TD 65536  
 SOLVENT CDCl3  
 NS 32  
 DS 4  
 SWH 64102.563 Hz  
 FIDRES 0.978127 Hz  
 AQ 0.5111808 sec  
 RG 203.57  
 DW 7.800 usec  
 DE 6.50 usec  
 TE 294.9 K  
 D1 2.00000000 sec  
 TD0 1

==== CHANNEL f1 =====  
 SFO1 161.9674942 MHz  
 NUC1 31P  
 P1 14.25 usec  
 PLW1 15.00000000 W

F2 - Processing parameters  
 SI 32768  
 SF 161.9755930 MHz  
 WDW EM  
 SSB 0  
 LB 1.00 Hz  
 GB 0  
 PC 1.40

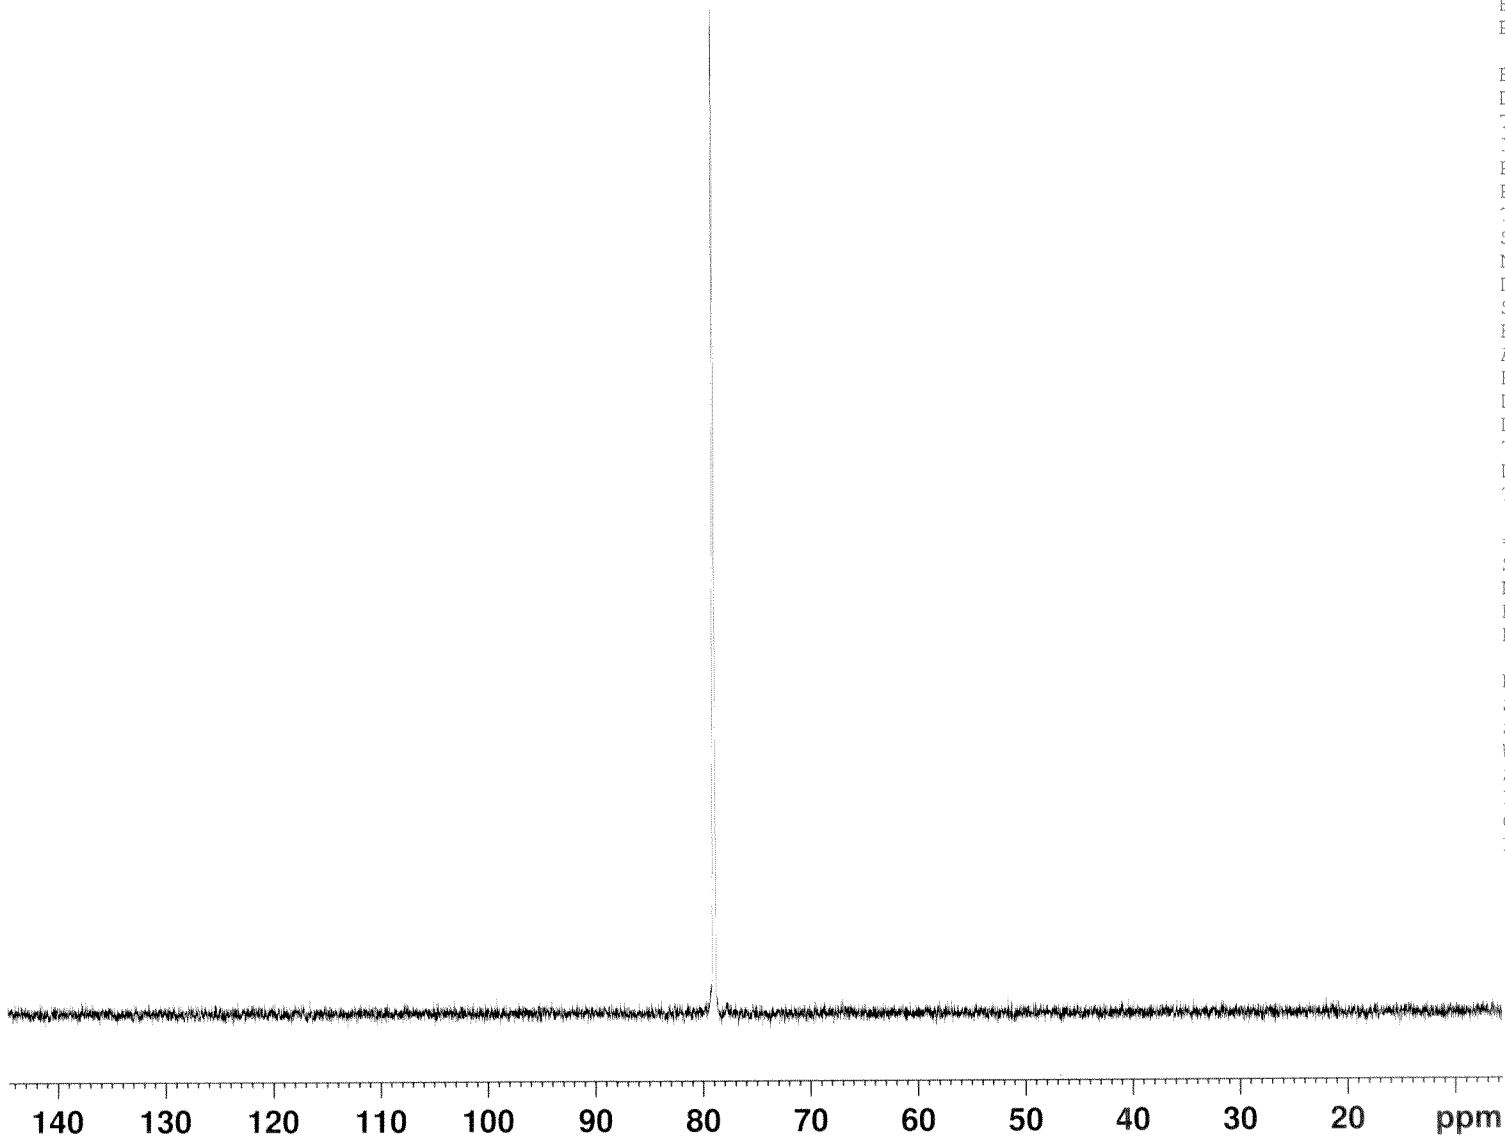

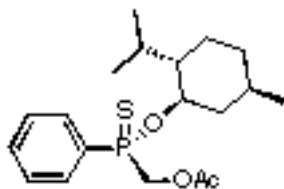

Compound (R<sub>p</sub>)-28b  
<sup>1</sup>H NMR

Current Data Parameters  
 NAME OB 1595 pure  
 EXPNO 3  
 PROCNO 1

F2 - Acquisition Parameters  
 Date\_ 20140723  
 Time 19.50  
 INSTRUM spect  
 PROBHD 5 mm PABBO BB/  
 PULPROG zg30  
 ID 65536  
 SOLVENT CDC13  
 NS 16  
 DS 2  
 SWH 8012.820 Hz  
 FIDRES 0.122266 Hz  
 AQ 4.0894465 sec  
 RG 81.67  
 DW 62.400 usec  
 DE 6.50 usec  
 TE 294.9 K  
 D1 1.00000000 sec  
 TD0 1

==== CHANNEL f1 =====  
 SFO1 400.1324710 MHz  
 NUC1 1H  
 P1 10.00 usec  
 PLW1 25.00300026 W

F2 - Processing parameters  
 SI 65536  
 SF 400.1300000 MHz  
 WDW EM  
 SSB 0  
 LB 0.30 Hz  
 GB 0  
 PC 1.00

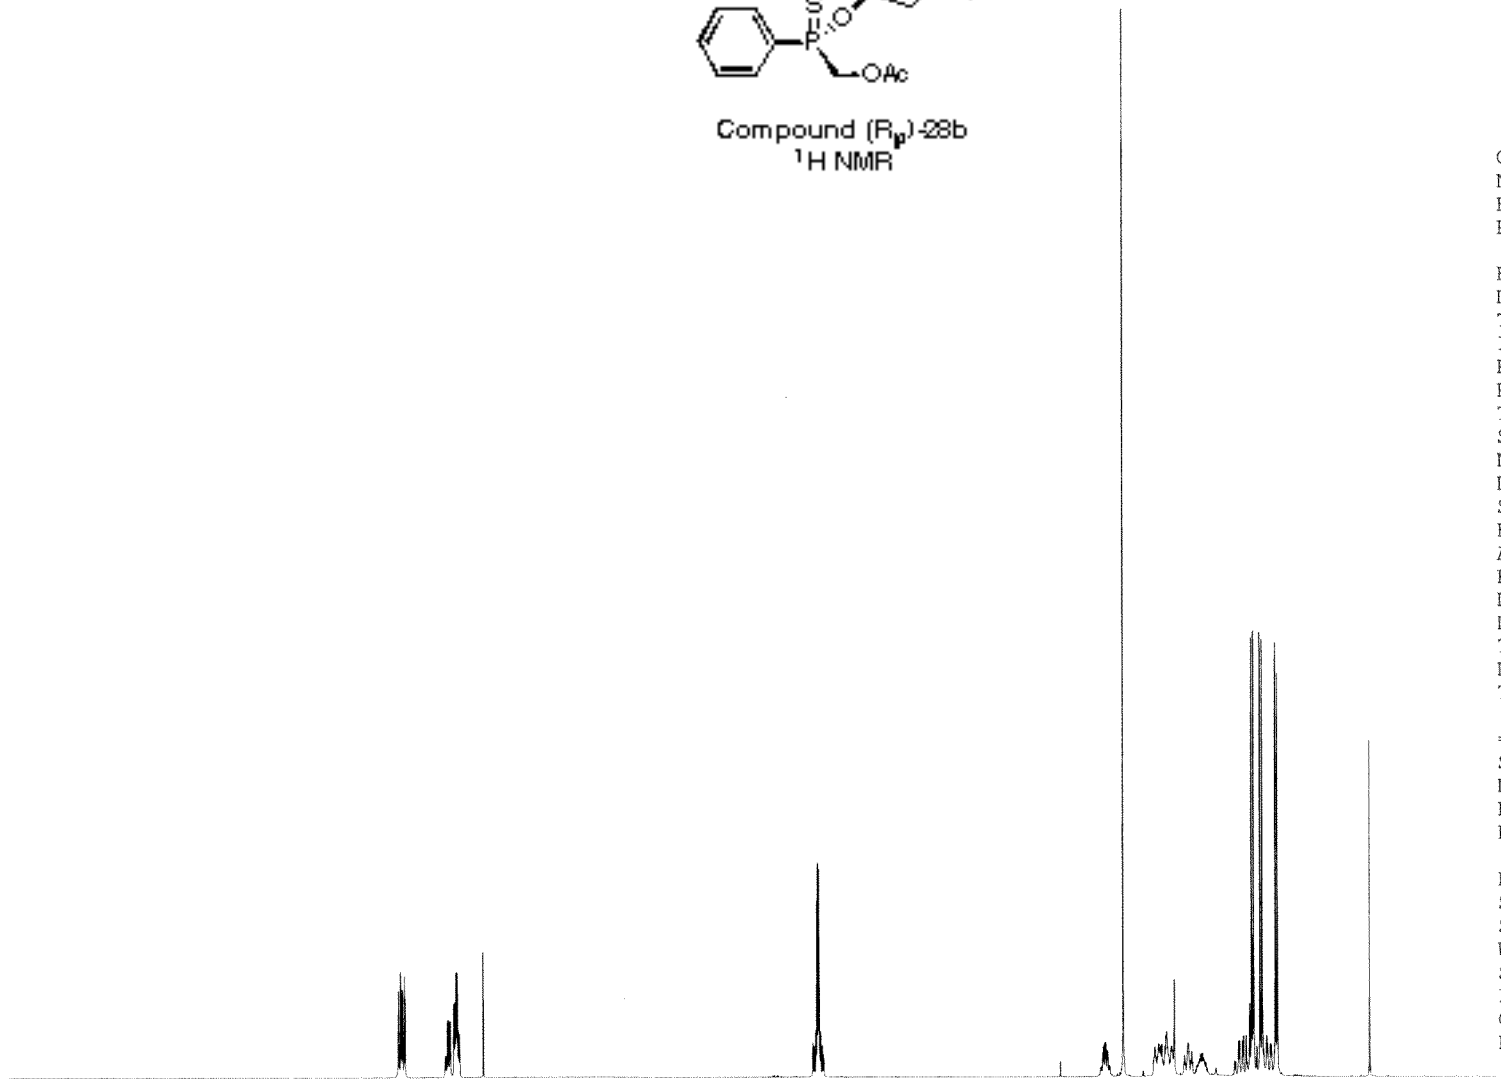

11 10 9 8 7 6 5 4 3 2 1 0 ppm

1.96  
 2.97

3.00

1.05  
 2.96  
 3.69  
 1.11  
 1.10  
 12.50

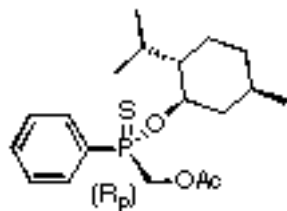

Compound (Rp)-28b  
<sup>13</sup>C NMR

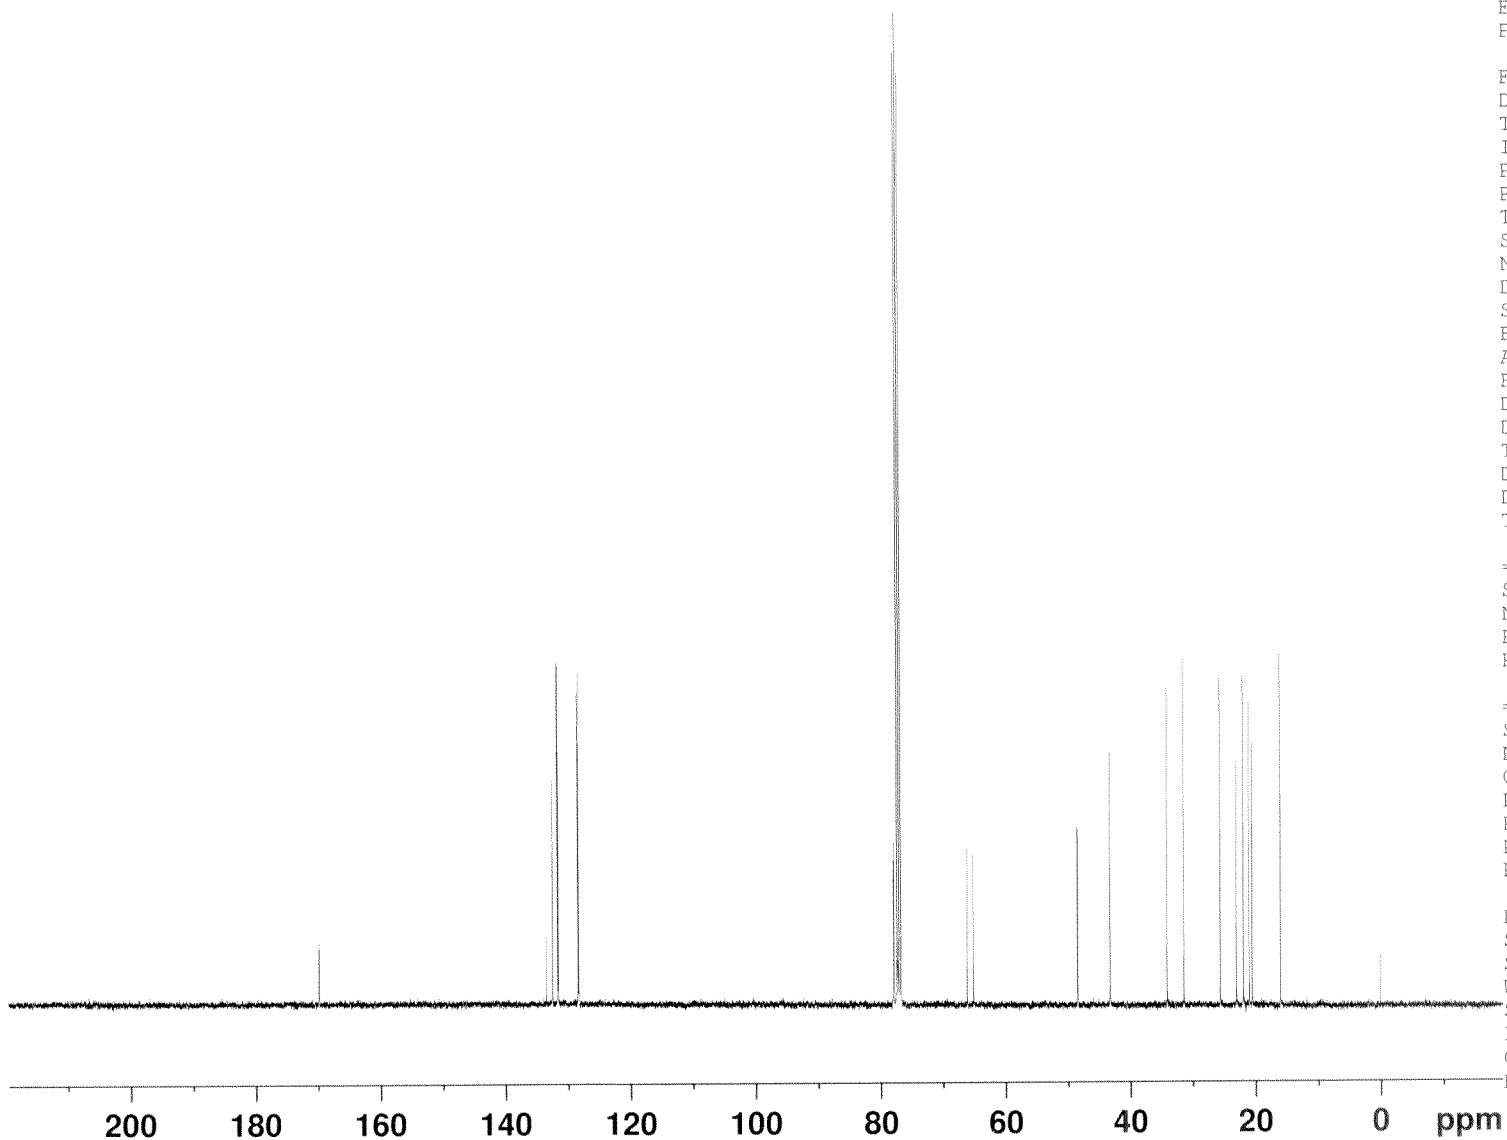

Current Data Parameters  
 NAME OB 1595 pure  
 EXPNO 4  
 PROCNO 1

F2 - Acquisition Parameters  
 Date\_ 20140723  
 Time 21.00  
 INSTRUM spect  
 PROBHD 5 mm PABBO BB/  
 PULPROG zgpg30  
 TD 65536  
 SOLVENT CDCl3  
 NS 1024  
 DS 4  
 SWH 24038.461 Hz  
 FIDRES 0.366798 Hz  
 AQ 1.3631488 sec  
 RG 203.57  
 DW 20.800 usec  
 DE 6.50 usec  
 TE 296.1 K  
 D1 2.0000000 sec  
 D11 0.0300000 sec  
 TD0 1

==== CHANNEL f1 =====  
 SFO1 100.6228293 MHz  
 NUC1 13C  
 P1 10.00 usec  
 PLW1 45.00000000 W

==== CHANNEL f2 =====  
 SFO2 400.1316005 MHz  
 NUC2 1H  
 CPDPRG[2] waltz16  
 PCPD2 90.00 usec  
 PLW2 10.00000000 W  
 PLW12 0.31604999 W  
 PLW13 0.25600001 W

F2 - Processing parameters  
 SI 32768  
 SF 100.6127685 MHz  
 WDW EM  
 SSB 0  
 LB 1.00 Hz  
 GB 0  
 PC 1.40



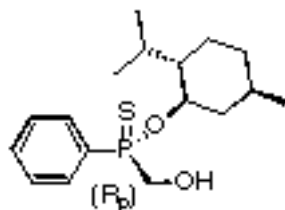

Compound (Rp)-29  
<sup>31</sup>P/<sup>1</sup>H NMR decoupled

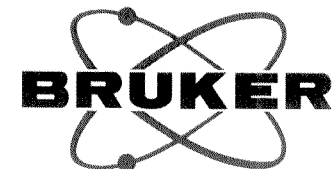

Current Data Parameters  
 NAME OB 1601  
 EXPNO 1  
 PROCNO 1

F2 - Acquisition Parameters  
 Date\_ 20140724  
 Time\_ 9.50  
 INSTRUM spect  
 PROBHD 5 mm PABBO BB/  
 PULPROG zgpg30  
 TD 65536  
 SOLVENT Acetone  
 NS 16  
 DS 4  
 SWH 64102.563 Hz  
 FIDRES 0.978127 Hz  
 AQ 0.5111808 sec  
 RG 203.57  
 DW 7.800 usec  
 DE 6.50 usec  
 TE 295.5 K  
 D1 2.00000000 sec  
 D11 0.03000000 sec  
 TDO 1

==== CHANNEL f1 =====  
 SFO1 161.9674942 MHz  
 NUC1 31P  
 P1 14.25 usec  
 PLW1 15.00000000 W

==== CHANNEL f2 =====  
 SFO2 400.1316005 MHz  
 NUC2 1H  
 CPDPRG[2] waltz16  
 PCPD2 90.00 usec  
 PLW2 10.00000000 W  
 PLW12 0.31604999 W  
 PLW13 0.25600001 W

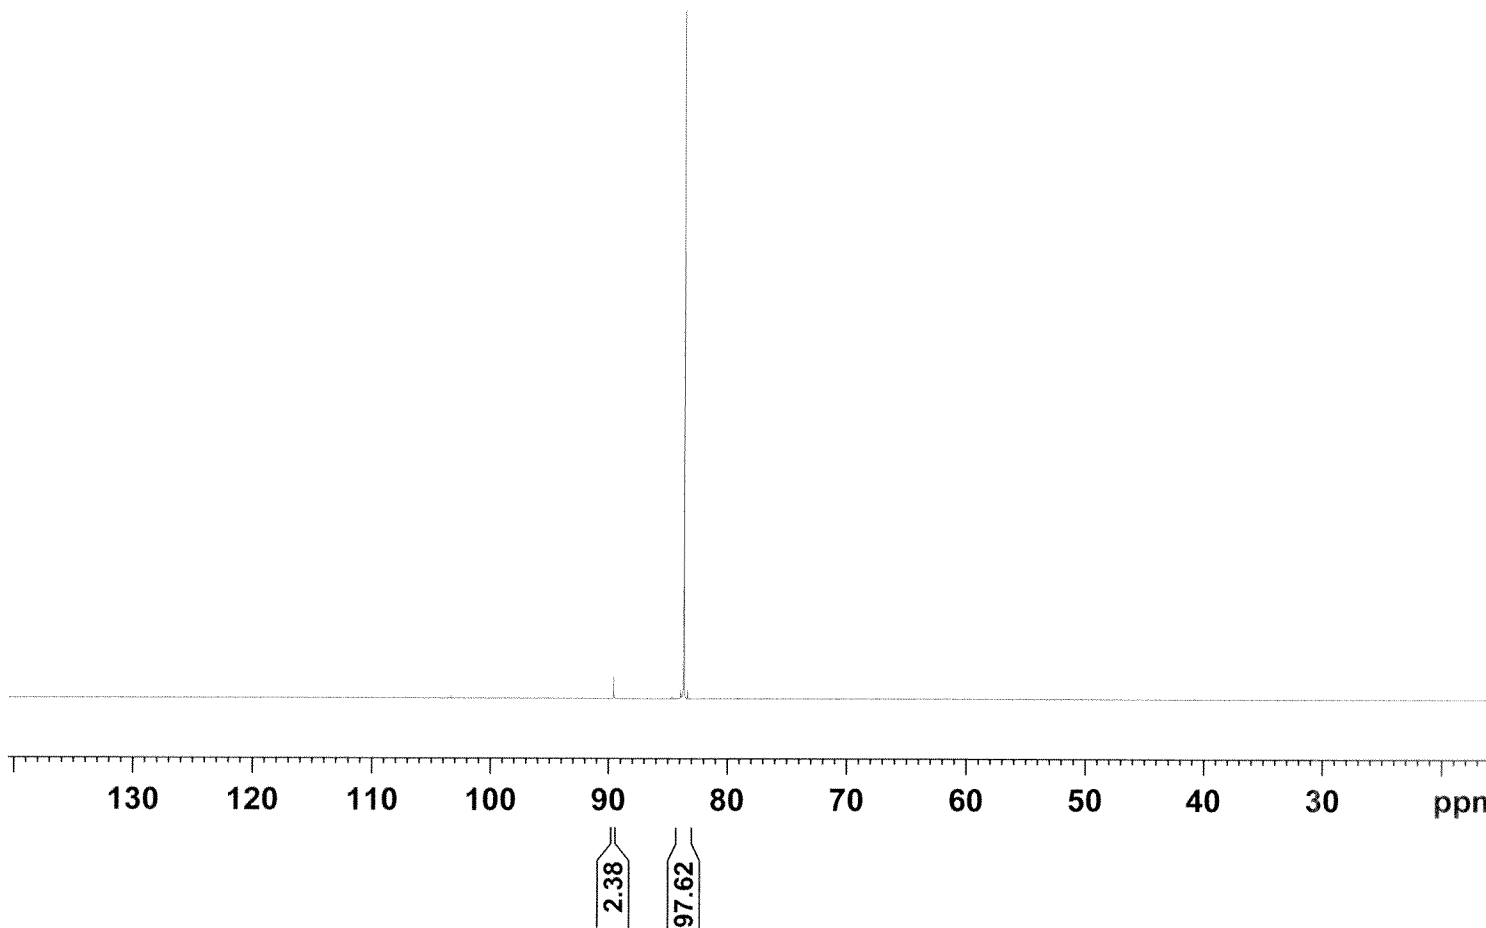

F2 - Processing parameters  
 SI 32768  
 SF 161.9755930 MHz  
 WDW EM  
 SSB 0  
 LB 1.00 Hz  
 GB 0  
 PC 1.40

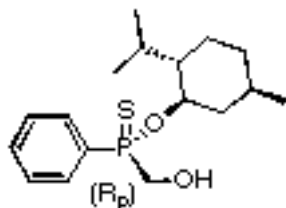

Compound (Rp)-29  
 $^{31}\text{P}/^1\text{H}$  NMR coupled

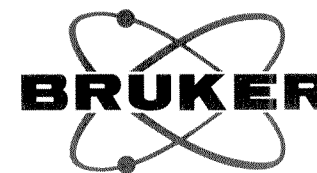

Current Data Parameters  
 NAME OB 1601  
 EXPNO 2  
 PROCNO 1

F2 - Acquisition Parameters  
 Date\_ 20140724  
 Time\_ 9.52  
 INSTRUM spect  
 PROBHD 5 mm PABBO BB/  
 PULPROG zg30  
 TD 65536  
 SOLVENT Acetone  
 NS 32  
 DS 4  
 SWH 64102.563 Hz  
 FIDRES 0.978127 Hz  
 AQ 0.5111808 sec  
 RG 203.57  
 DW 7.800 usec  
 DE 6.50 usec  
 TE 295.2 K  
 D1 2.00000000 sec  
 TD0 1

===== CHANNEL f1 =====  
 SFO1 161.9674942 MHz  
 NUC1 31P  
 P1 14.25 usec  
 PLW1 15.00000000 W

F2 - Processing parameters  
 SI 32768  
 SF 161.9755930 MHz  
 WDW EM  
 SSB 0  
 LB 1.00 Hz  
 GB 0  
 PC 1.40

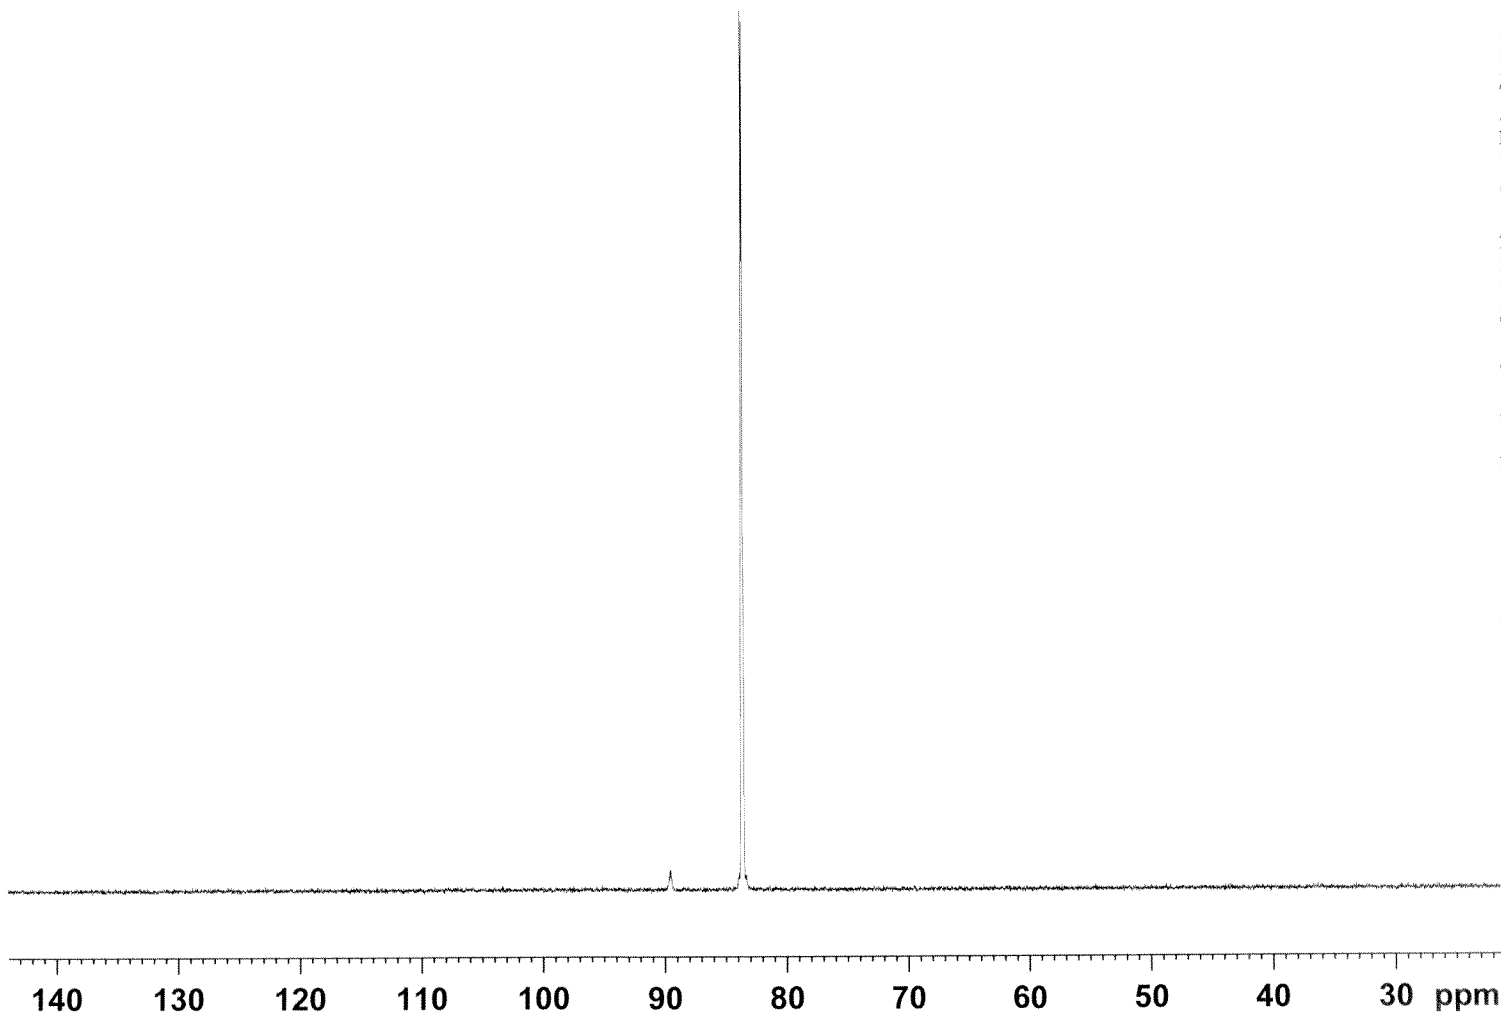

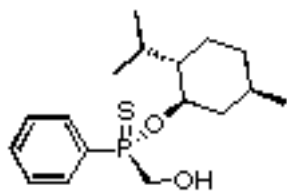

Compound (Rp)-29  
<sup>1</sup>H NMR

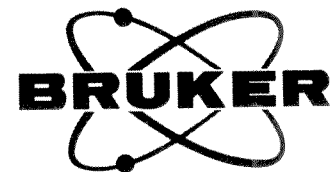

Current Data Parameters  
 NAME OB1601 pure2  
 EXPNO 3  
 PROCNO 1

F2 - Acquisition Parameters  
 Date\_ 20151124  
 Time\_ 17.18  
 INSTRUM spect  
 PROBHD 5 mm PABBO BB/  
 PULPROG zg30  
 TD 65536  
 SOLVENT CDC13  
 NS 16  
 DS 2  
 SWH 8012.820 Hz  
 FIDRES 0.122266 Hz  
 AQ 4.0894465 sec  
 RG 12.96  
 DW 62.400 usec  
 DE 6.50 usec  
 TE 292.2 K  
 D1 1.00000000 sec  
 TDO 1

==== CHANNEL f1 =====  
 SFO1 400.1324710 MHz  
 NUC1 1H  
 P1 10.00 usec  
 PLW1 25.00300026 W

F2 - Processing parameters  
 SI 65536  
 SF 400.1300000 MHz  
 WDW EM  
 SSB 0  
 LB 0.30 Hz  
 GB 0  
 PC 1.00

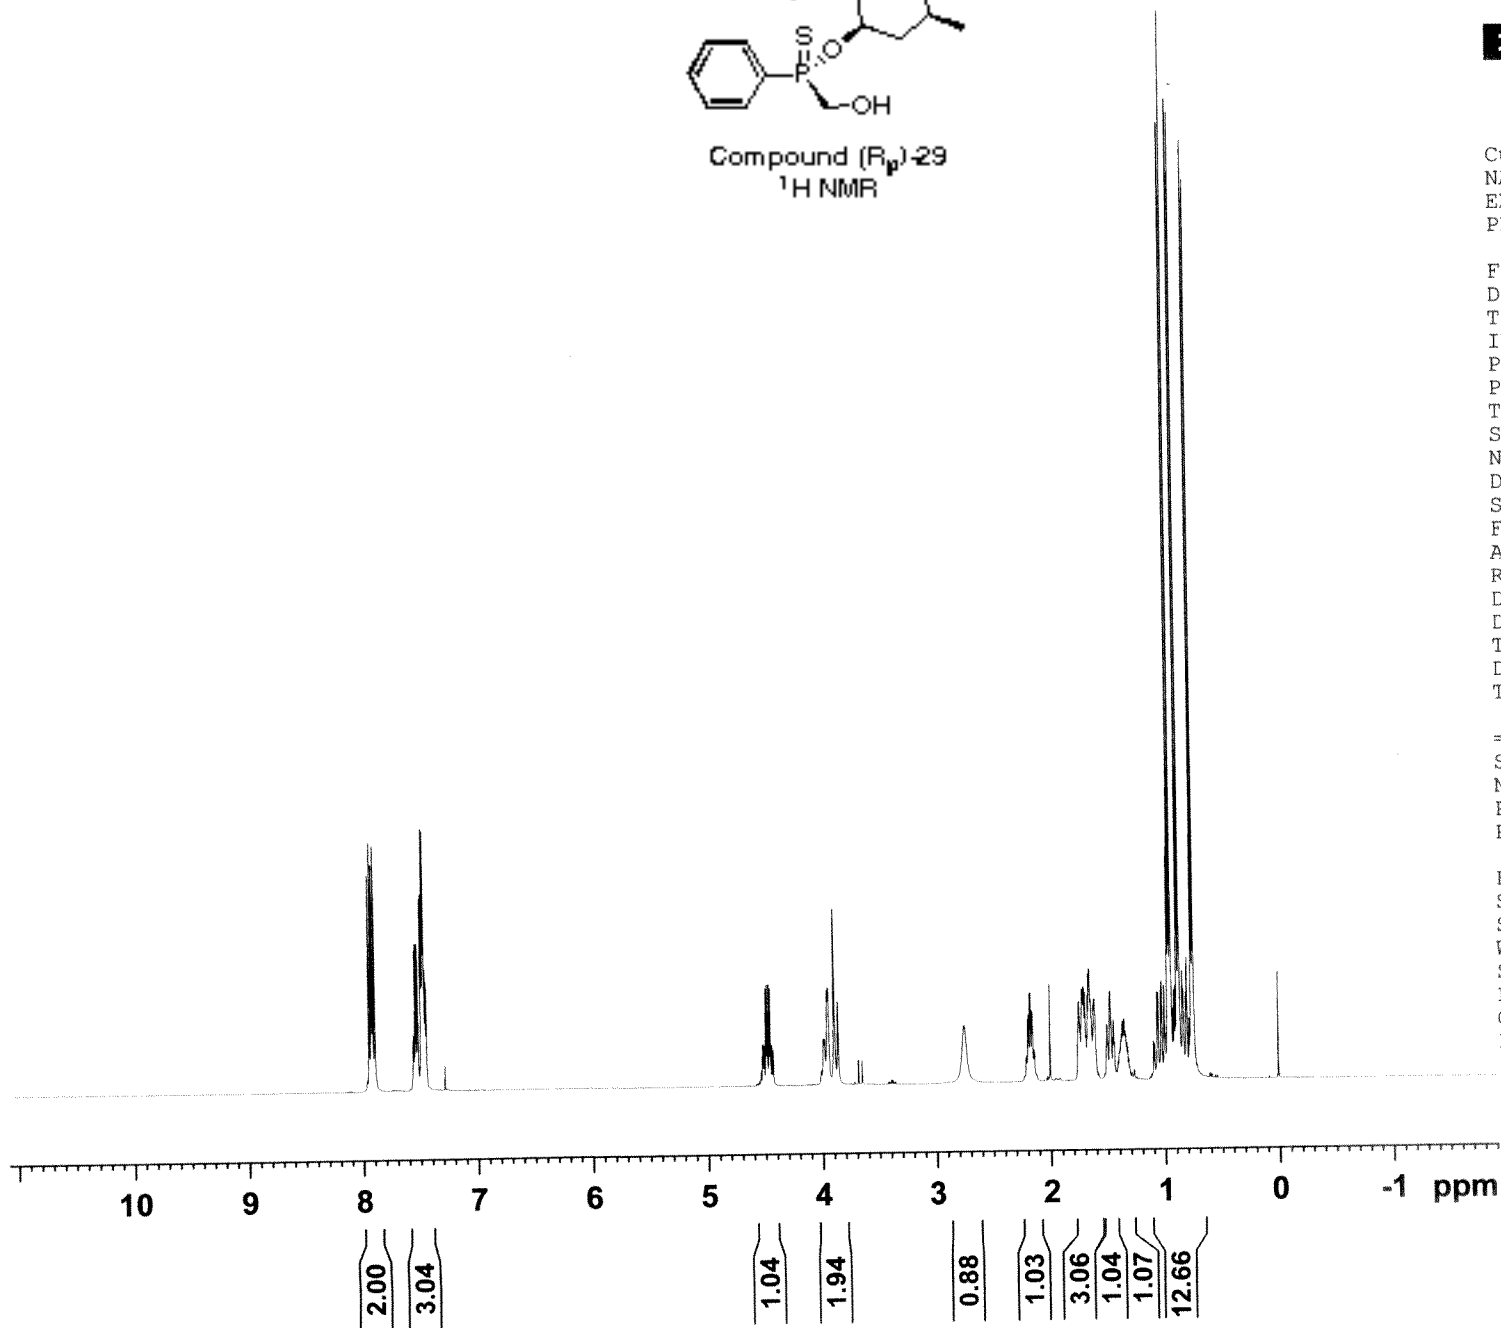

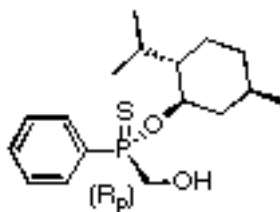

Compound (Rp)-29  
<sup>13</sup>C NMR

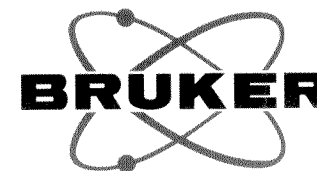

Current Data Parameters  
 NAME OB1601 pure2  
 EXPNO 4  
 PROCNO 1

F2 - Acquisition Parameters  
 Date 20151124  
 Time 17.35  
 INSTRUM spect  
 PROBHD 5 mm PABBO BB/  
 PULPROG zgpg30  
 TD 65536  
 SOLVENT CDCl3  
 NS 242  
 DS 4  
 SWH 24038.461 Hz  
 FIDRES 0.366798 Hz  
 AQ 1.3631488 sec  
 RG 203.57  
 DW 20.800 usec  
 DE 6.50 usec  
 TE 293.1 K  
 D1 2.0000000 sec  
 D11 0.0300000 sec  
 TD0 1

==== CHANNEL f1 =====  
 SFO1 100.6228293 MHz  
 NUC1 13C  
 P1 10.00 usec  
 PLW1 45.0000000 W

==== CHANNEL f2 =====  
 SFO2 400.1316005 MHz  
 NUC2 1H  
 CPDPRG[2] waltz16  
 PCPD2 90.00 usec  
 PLW2 10.0000000 W  
 PLW12 0.31604999 W  
 PLW13 0.25600001 W

F2 - Processing parameters  
 SI 32768  
 SF 100.6127685 MHz  
 WDW EM  
 SSB 0  
 LB 1.00 Hz  
 GB 0  
 PC 1.40

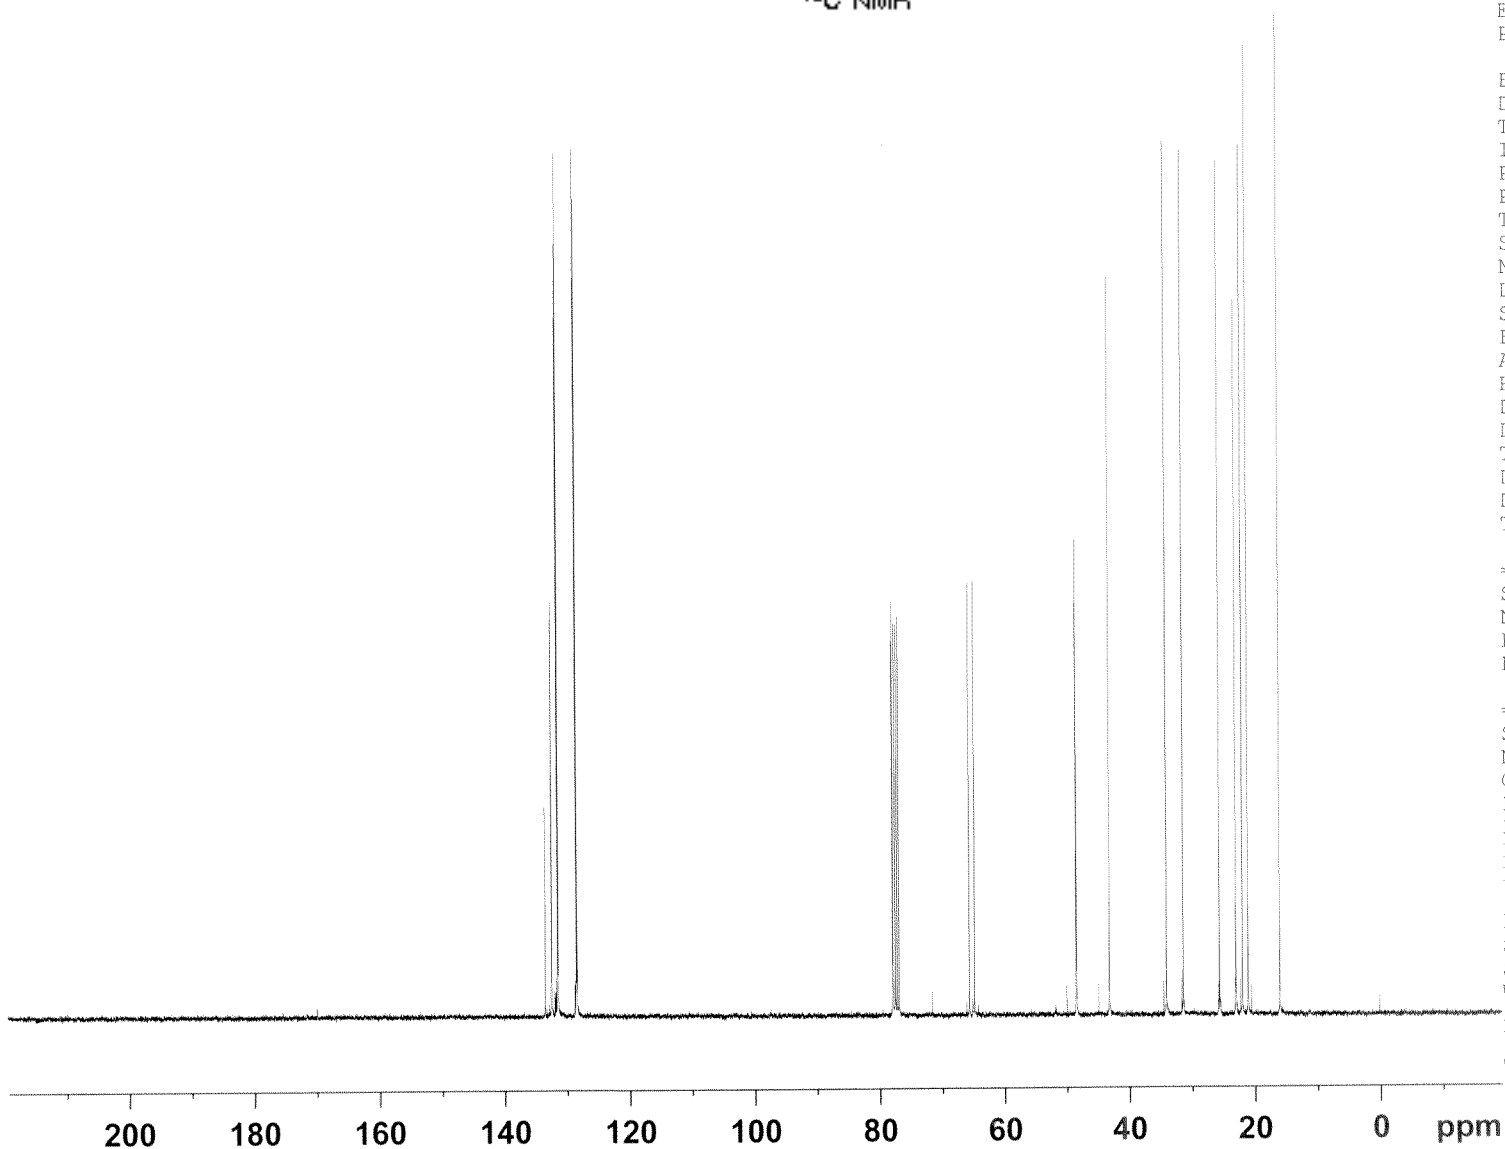

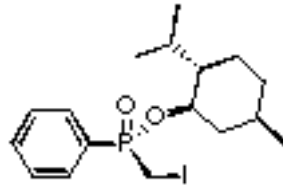

Compound (S<sub>p</sub>)-30  
<sup>31</sup>P/<sup>1</sup>H NMR decoupled

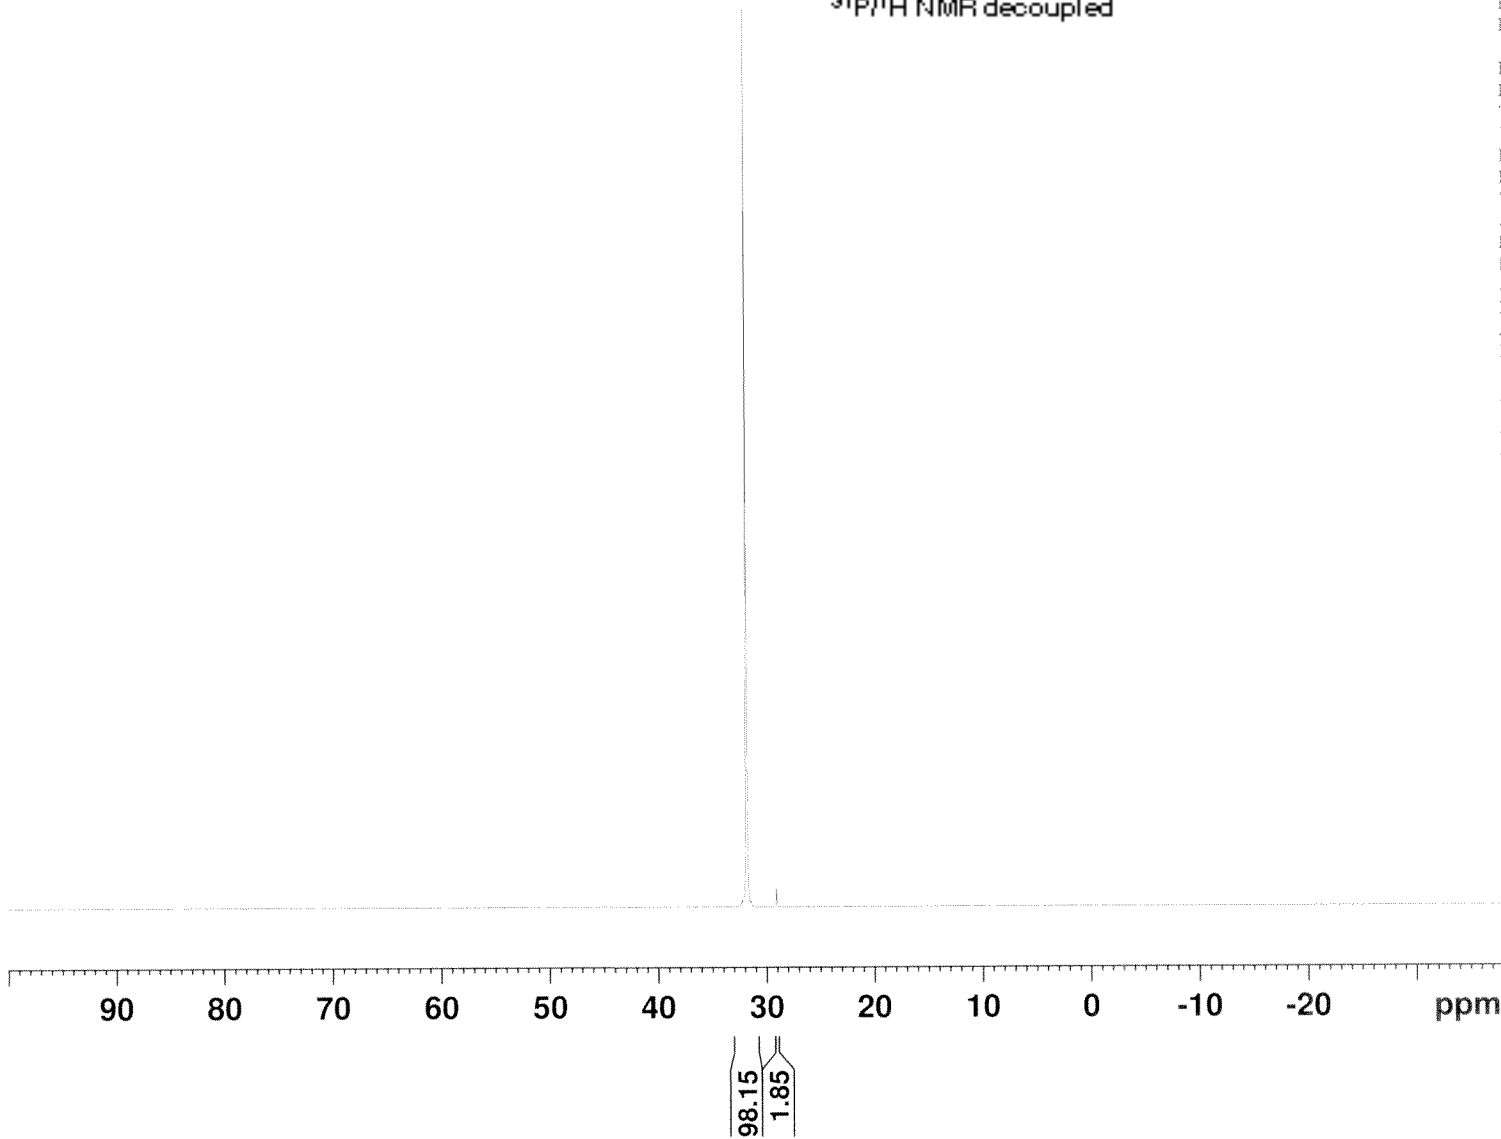

Current Data Parameters  
 NAME OB 1662 after work-up  
 EXPNO 1  
 PROCNO 1

F2 - Acquisition Parameters  
 Date\_ 20140815  
 Time 17.51  
 INSTRUM spect  
 PROBHD 5 mm PABBO BB/  
 PULPROG zgpg30  
 TD 65536  
 SOLVENT CDCl3  
 NS 16  
 DS 4  
 SWH 64102.563 Hz  
 FIDRES 0.978127 Hz  
 AQ 0.5111808 sec  
 RG 203.57  
 DW 7.800 usec  
 DE 6.50 usec  
 TE 295.3 K  
 D1 2.0000000 sec  
 D11 0.03000000 sec  
 TD0 1

==== CHANNEL f1 =====  
 SFO1 161.9674942 MHz  
 NUC1 31P  
 P1 14.25 usec  
 PLW1 15.00000000 W

==== CHANNEL f2 =====  
 SFO2 400.1316005 MHz  
 NUC2 1H  
 CPDPRG[2] waltz16  
 PCPD2 90.00 usec  
 PLW2 10.00000000 W  
 PLW12 0.31604999 W  
 PLW13 0.25600001 W

F2 - Processing parameters  
 SI 32768  
 SF 161.9755930 MHz  
 WDW EM  
 SSB 0  
 LB 1.00 Hz  
 GB 0  
 PC 1.40

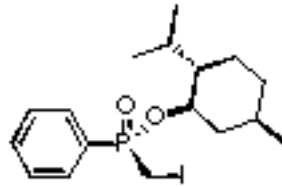

Compound (S<sub>p</sub>)-80  
<sup>31</sup>P/<sup>1</sup>H NMR coupled

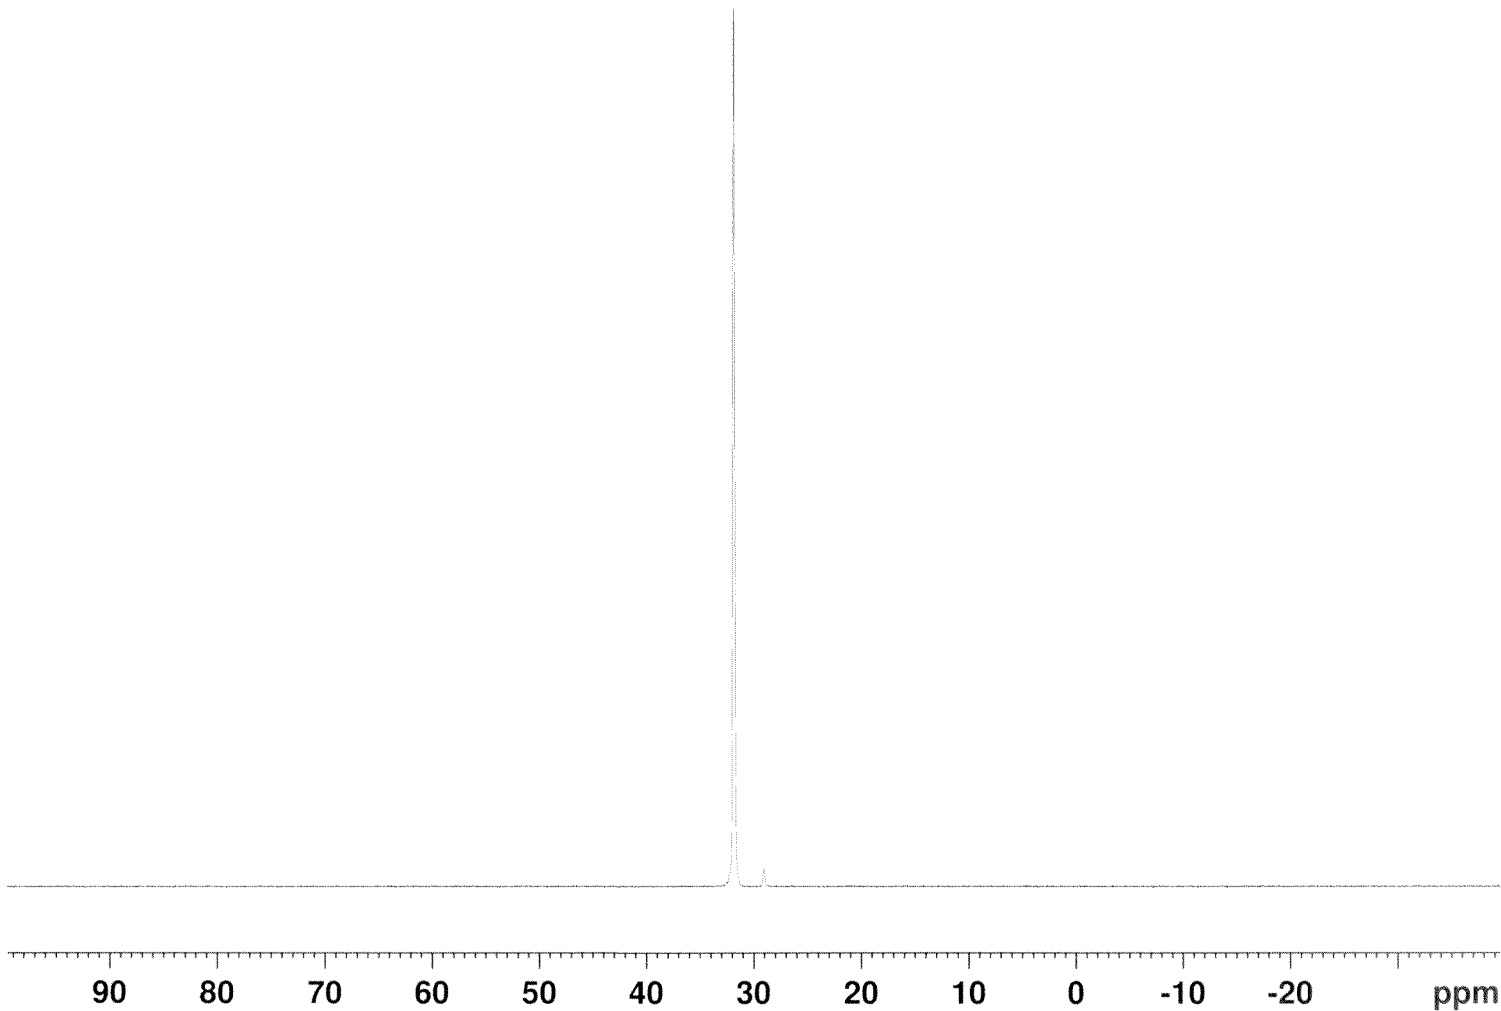

Current Data Parameters  
NAME OB 1662 after work-up  
EXPNO 2  
PROCNO 1

F2 - Acquisition Parameters  
Date\_ 20140815  
Time 17.53  
INSTRUM spect  
PROBHD 5 mm PABBO BB/  
PULPROG zg30  
TD 65536  
SOLVENT CDCl3  
NS 16  
DS 4  
SWH 64102.563 Hz  
FIDRES 0.978127 Hz  
AQ 0.5111808 sec  
RG 203.57  
DW 7.800 usec  
DE 6.50 usec  
TE 294.9 K  
D1 2.00000000 sec  
TD0 1

==== CHANNEL f1 =====  
SF01 161.9674942 MHz  
NUC1 31P  
P1 14.25 usec  
PLW1 15.00000000 W

F2 - Processing parameters  
SI 32768  
SF 161.9755930 MHz  
WDW EM  
SSB 0  
LB 1.00 Hz  
GB 0  
PC 1.40

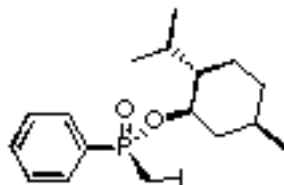

Compound (S<sub>p</sub>)-30  
<sup>1</sup>H NMR

Current Data Parameters  
 NAME OB 1662 after work-up  
 EXPNO 3  
 PROCNO 1

F2 - Acquisition Parameters  
 Date\_ 20140815  
 Time 17.57  
 INSTRUM spect  
 PROBHD 5 mm PABBO BB/  
 PULPROG zg30  
 TD 65536  
 SOLVENT CDCl3  
 NS 9  
 DS 2  
 SWH 8012.820 Hz  
 FIDRES 0.122266 Hz  
 AQ 4.089465 sec  
 RG 8.12  
 DW 62.400 usec  
 DE 6.50 usec  
 TE 295.1 K  
 D1 1.0000000 sec  
 TD0 1

===== CHANNEL f1 =====  
 SF01 400.1324710 MHz  
 NUC1 1H  
 P1 10.00 usec  
 PLW1 25.00300026 W

F2 - Processing parameters  
 SI 65536  
 SF 400.1300000 MHz  
 WDW EM  
 SSB 0  
 LB 0.30 Hz  
 GB 0  
 PC 1.00

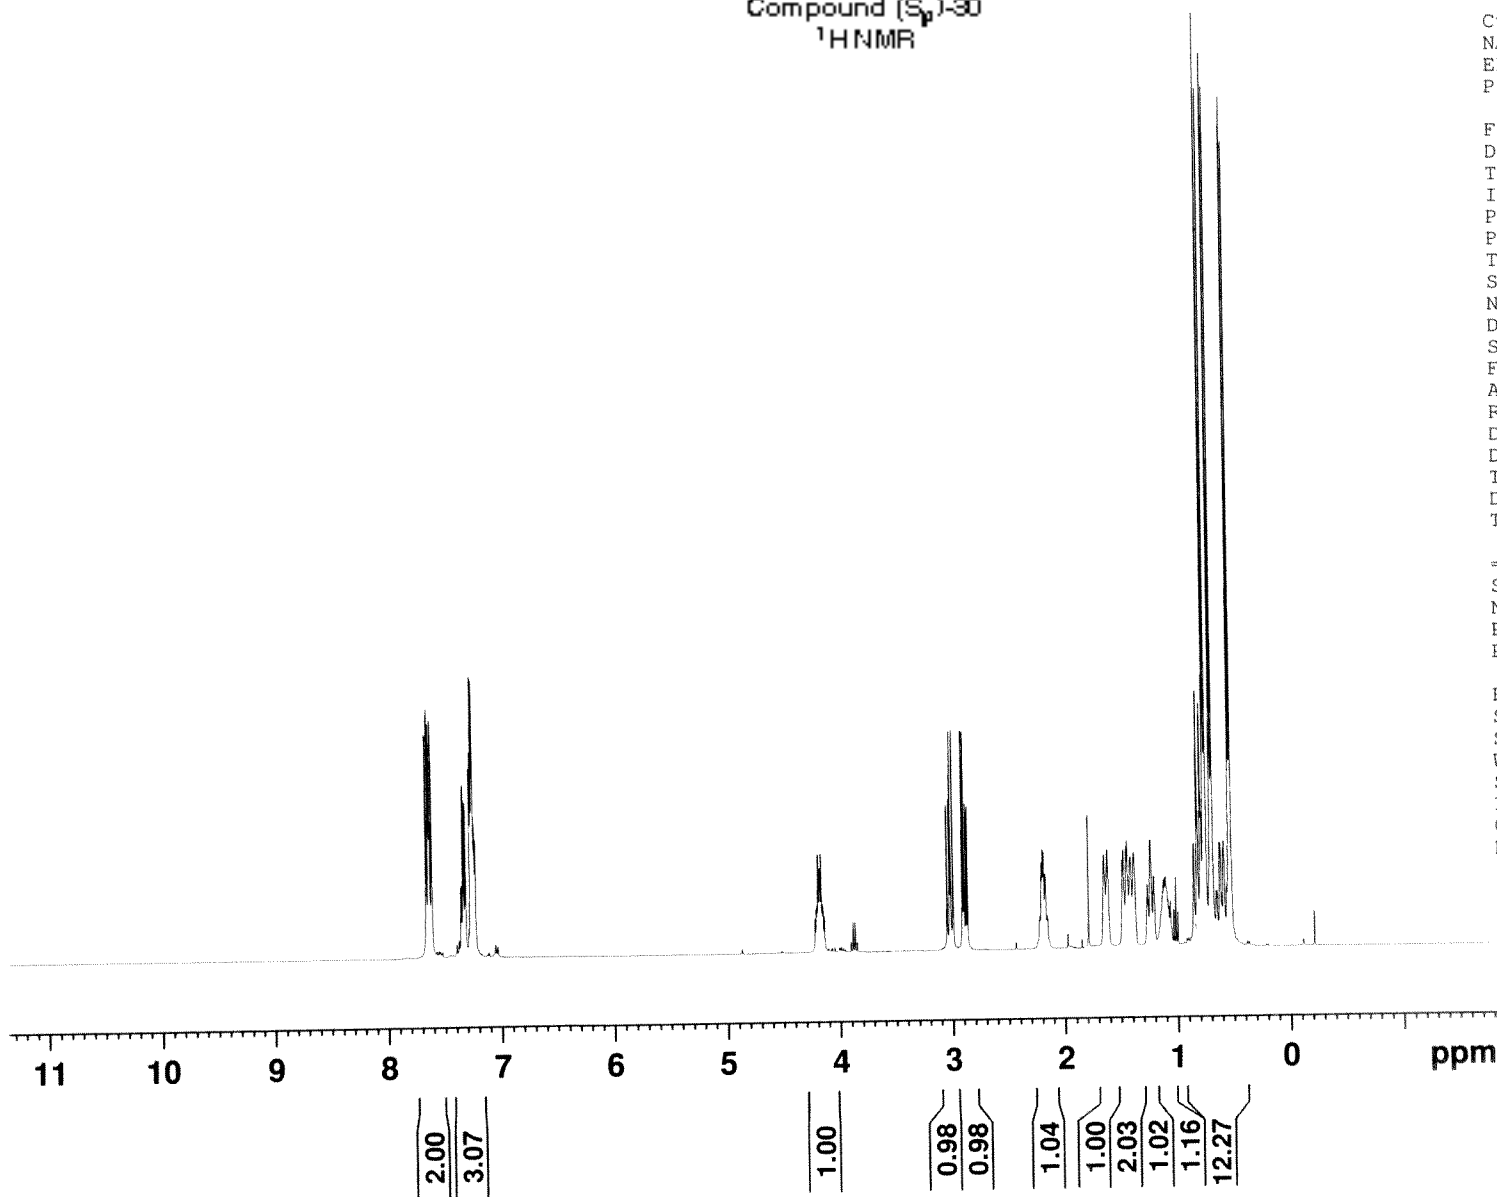

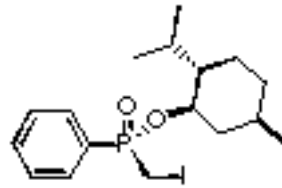

Compound (S<sub>p</sub>)-30  
<sup>13</sup>C NMR

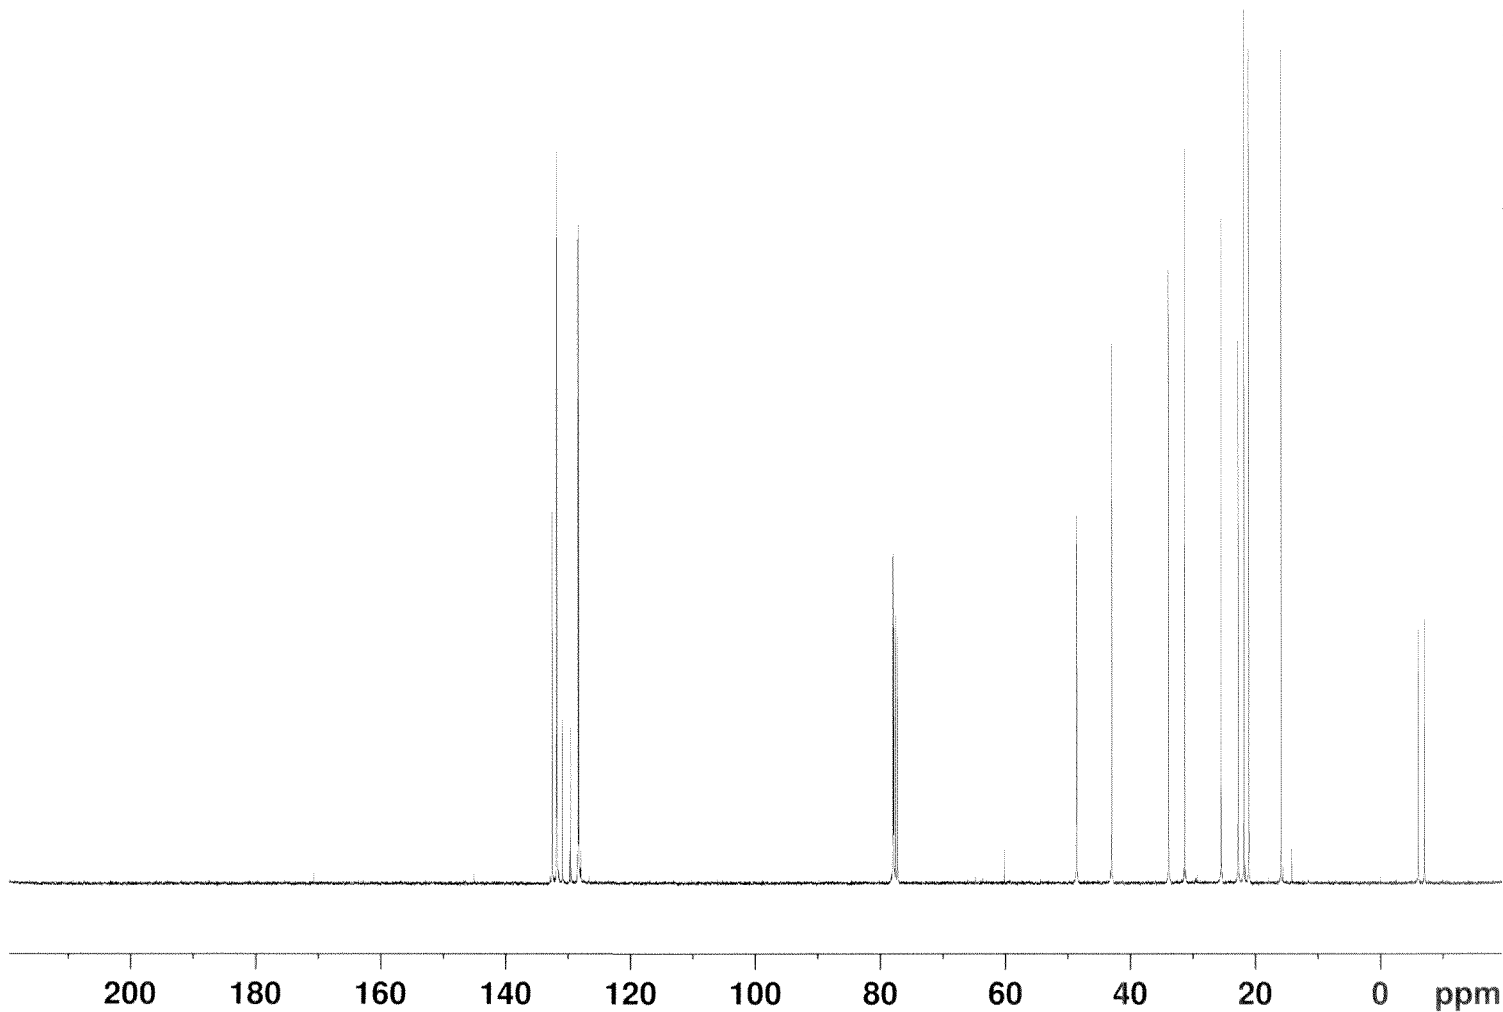

Current Data Parameters  
 NAME OB 1662 after work-up  
 EXPNO 4  
 PROCNO 1

F2 - Acquisition Parameters  
 Date\_ 20140815  
 Time 18.13  
 INSTRUM spect  
 PROBHD 5 mm PABBO BB/  
 PULPROG zgpg30  
 TD 65536  
 SOLVENT CDCl3  
 NS 222  
 DS 4  
 SWH 24038.461 Hz  
 FIDRES 0.366798 Hz  
 AQ 1.3631488 sec  
 RG 203.57  
 DW 20.800 usec  
 DE 6.50 usec  
 TE 296.1 K  
 D1 2.00000000 sec  
 D11 0.03000000 sec  
 TD0 1

==== CHANNEL f1 =====  
 SFO1 100.6228293 MHz  
 NUC1 13C  
 P1 10.00 usec  
 PLW1 45.00000000 W

==== CHANNEL f2 =====  
 SFO2 400.1316005 MHz  
 NUC2 1H  
 CPDPRG[2] waltz16  
 PCPD2 90.00 usec  
 PLW2 10.00000000 W  
 PLW12 0.31604999 W  
 PLW13 0.25600001 W

F2 - Processing parameters  
 SI 32768  
 SF 100.6127685 MHz  
 WDW EM  
 SSB 0  
 LB 1.00 Hz  
 GB 0  
 PC 1.40



OB 927  
pad=10 run with findz0 before acquisition

exp1 Phosphorus

| SAMPLE              |                | SPECIAL    |          |
|---------------------|----------------|------------|----------|
| date                | Jan 31 2013    | temp       | not used |
| solvent             | cdcl3          | gain       | 14       |
| file                | /home/TCUuser~ | spin       | 20       |
| /vnmrsys/data/auto~ |                | hst        | 0.008    |
| _2013.01.20/s_2013~ |                | pw90       | 18.300   |
| 0131_14/data/Cdc13~ |                | alfa       | 10.000   |
| 03.fid              |                | FLAGS      |          |
| ACQUISITION         |                | PROCESSING |          |
| sw                  | 15797.8        | il         | n        |
| at                  | 1.600          | in         | n        |
| np                  | 50552          | dp         | y        |
| fb                  | 8800           | hs         | ny       |
| bs                  | 64             | lb         | 1.00     |
| d1                  | 1.000          | fn         | not used |
| nt                  | 16             | DISPLAY    |          |
| ct                  | 16             | sp         | -3647.3  |
| TRANSMITTER         |                | wp         | 15797.3  |
| tn                  | P31            | rf1        | 3647.8   |
| sfrq                | 121.465        | rfp        | 0        |
| tof                 | 7421.1         | rp         | -137.9   |
| tpwr                | 55             | lp         | -350.5   |
| pw                  | 9.150          | PLOT       |          |
| DECOUPLER           |                | wc         | 250      |
| dn                  | H1             | sc         | 0        |
| dof                 | 0              | vs         | 21       |
| dm                  | yyy            | th         | 5        |
| dmm                 | w              | ai         | cdc ph   |
| dpwr                | 35             |            |          |
| dmf                 | 6700           |            |          |

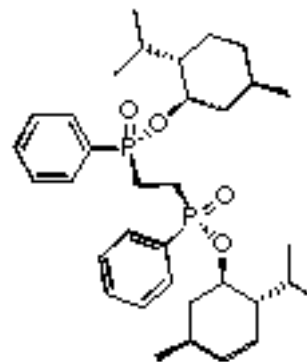

Compound (Rp,Rp)-31  
<sup>31</sup>P/<sup>1</sup>H NMR decoupled

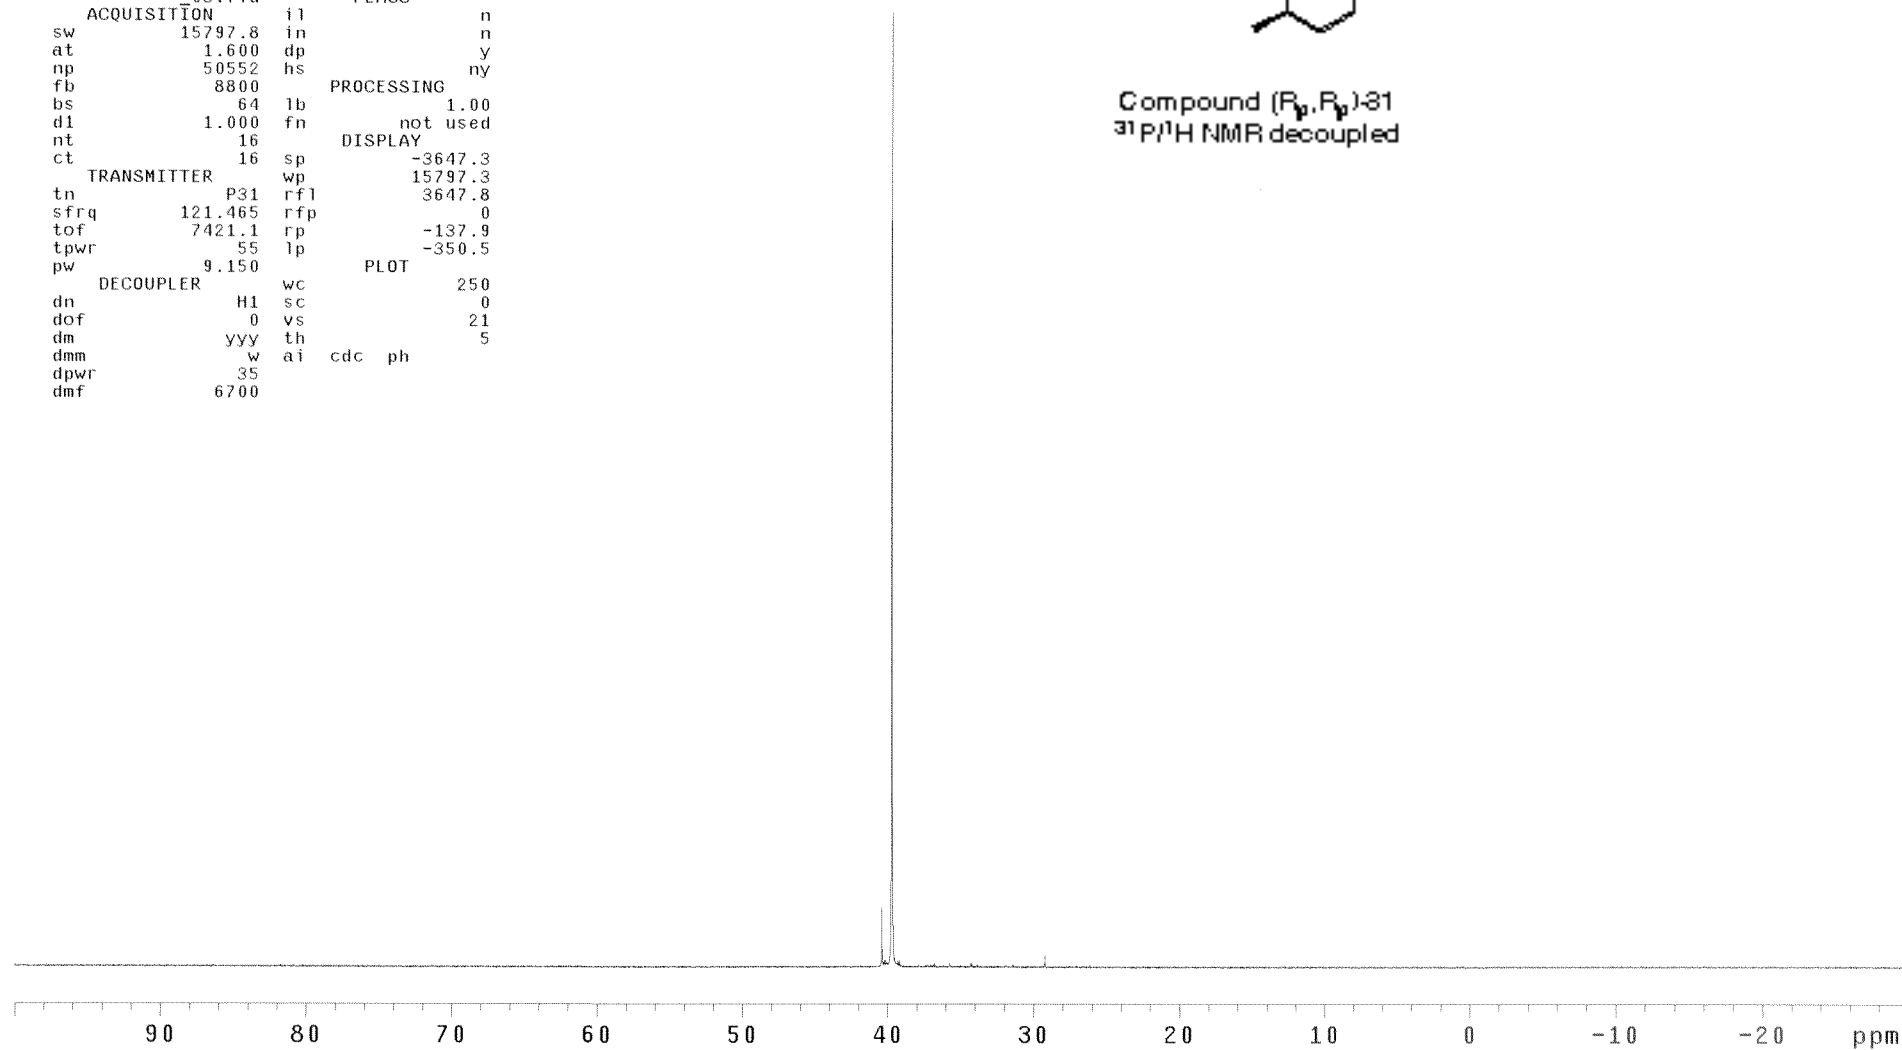

94.48  
5.52

0B 927

exp1 Phosphorus

| SAMPLE              |                | SPECIAL    |          |
|---------------------|----------------|------------|----------|
| date                | Jan 31 2013    | temp       | not used |
| solvent             | cdcl3          | gain       | 14       |
| file                | /home/TCUuser~ | spin       | 20       |
| /vnmrsys/data/auto~ |                | hst        | 0.008    |
| _2013.01.20/s_2013~ |                | pw90       | 18.300   |
| 0131_14/data/cdcl3~ |                | alfa       | 10.000   |
|                     | 06.fid         | FLAGS      |          |
| ACQUISITION         |                | PROCESSING |          |
| sw                  | 15797.8        | il         | n        |
| at                  | 1.600          | in         | n        |
| np                  | 50552          | dp         | y        |
| fb                  | 8800           | hs         | ny       |
| bs                  | 64             | lb         | 1.00     |
| d1                  | 1.000          | fn         | not used |
| nt                  | 16             | DISPLAY    |          |
| ct                  | 16             | sp         | -3647.3  |
| TRANSMITTER         |                | wp         | 15797.3  |
| tn                  | P31            | rfl        | 3647.8   |
| sfrq                | 121.465        | rfp        | 0        |
| tof                 | 7421.1         | rp         | 108.7    |
| tpwr                | 55             | lp         | -113.7   |
| pw                  | 9.150          | PLOT       |          |
| DECOUPLER           |                | wc         | 250      |
| dn                  | H1             | sc         | 0        |
| dof                 | 0              | vs         | 170      |
| dm                  | ynn            | th         | 4        |
| dmm                 | w              | ai         | cdc ph   |
| dpwr                | 35             |            |          |
| dmf                 | 6700           |            |          |

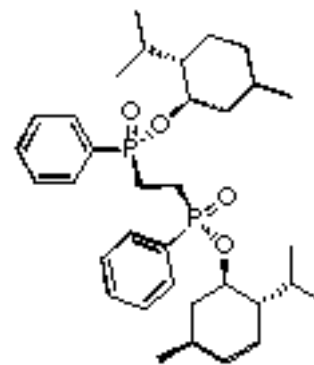

Compound (Rp, Rp)-81  
<sup>31</sup>P/<sup>1</sup>H NMR coupled

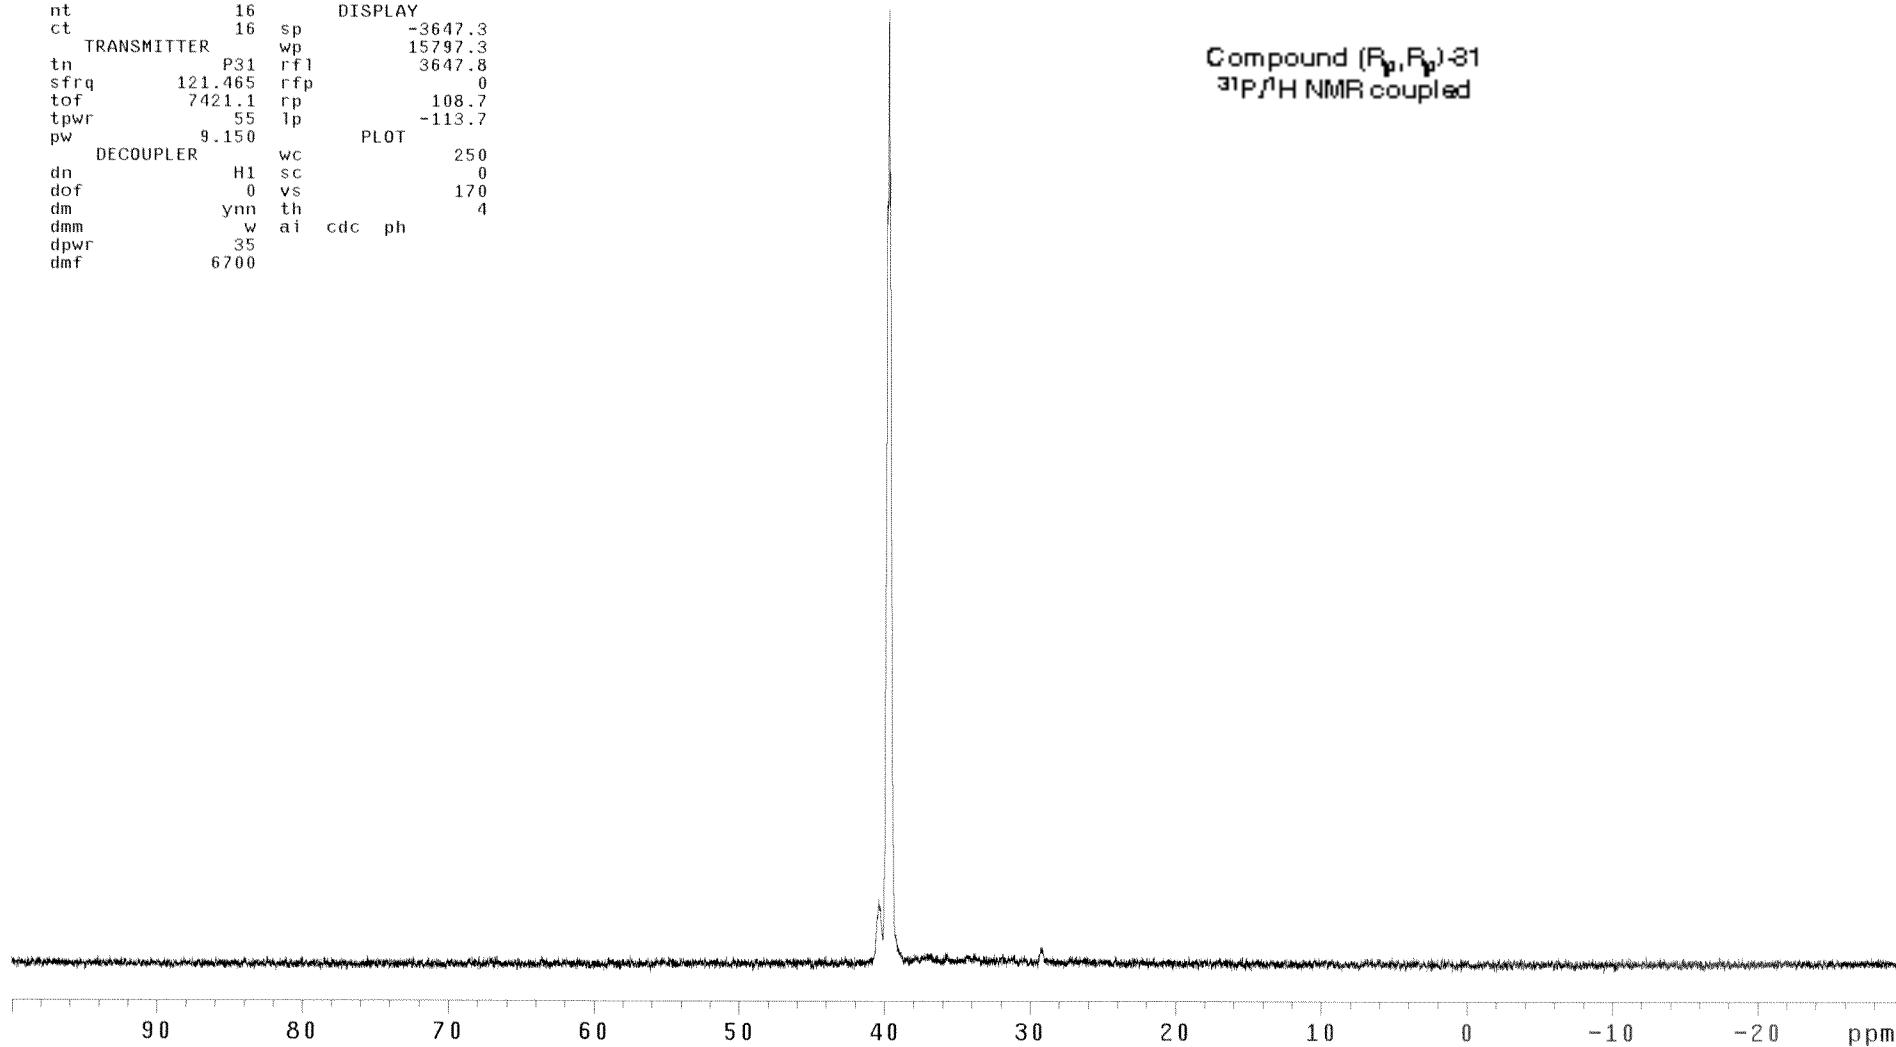

OB 927  
pad=10 run with findz0 before acquisition

exp1 Proton

| SAMPLE              |                | DEC. & VT  |                 |
|---------------------|----------------|------------|-----------------|
| date                | Jan 31 2013    | dfrq       | 75.454          |
| solvent             | cdcl3          | dn         | C13             |
| file                | /home/TCUuser~ | dpwr       | 43              |
| /vnmrsys/data/auto~ |                | dof        | 0               |
| _2013.01.20/s_2013~ |                | dm         | nnn             |
| 0131_13/data/cdcl3~ |                | dmm        | c               |
|                     | 01.fid         | dmf        | 13100           |
| ACQUISITION         |                | PROCESSING |                 |
| sfrq                | 300.047        | wtfile     |                 |
| tn                  | H1             | proc       | ft              |
| at                  | 1.998          | fn         | not used        |
| np                  | 19184          |            |                 |
| sw                  | 4800.8         | werr       | xmreact         |
| fb                  | 2600           | wexp       | abortoff flus~  |
| bs                  | 16             | h          | proplot aborton |
| tpwr                | 55             | wbs        |                 |
| pw                  | 7.9            | wnt        |                 |
| d1                  | 1.000          |            |                 |
| tof                 | 277.9          |            |                 |
| nt                  | 16             |            |                 |
| ct                  | 16             |            |                 |
| alock               | y              |            |                 |
| gain                | not used       |            |                 |
| FLAGS               |                |            |                 |
| il                  | n              |            |                 |
| in                  | n              |            |                 |
| dp                  | y              |            |                 |
| DISPLAY             |                |            |                 |
| sp                  | -593.4         |            |                 |
| wp                  | 4800.5         |            |                 |
| vs                  | 344            |            |                 |
| sc                  | 0              |            |                 |
| wc                  | 240            |            |                 |
| hzmm                | 20.00          |            |                 |
| is                  | 419.49         |            |                 |
| rfl                 | 593.6          |            |                 |
| rfp                 | 0              |            |                 |
| th                  | 2              |            |                 |
| ins                 | 1.000          |            |                 |
| ai                  | cdc ph         |            |                 |

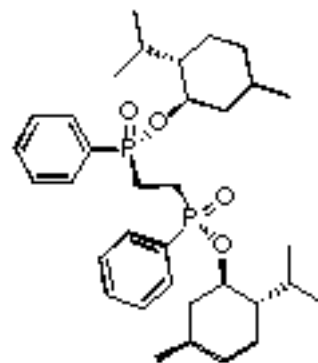

Compound ( $R_p, R_p$ )-31  
 $^1H$  NMR

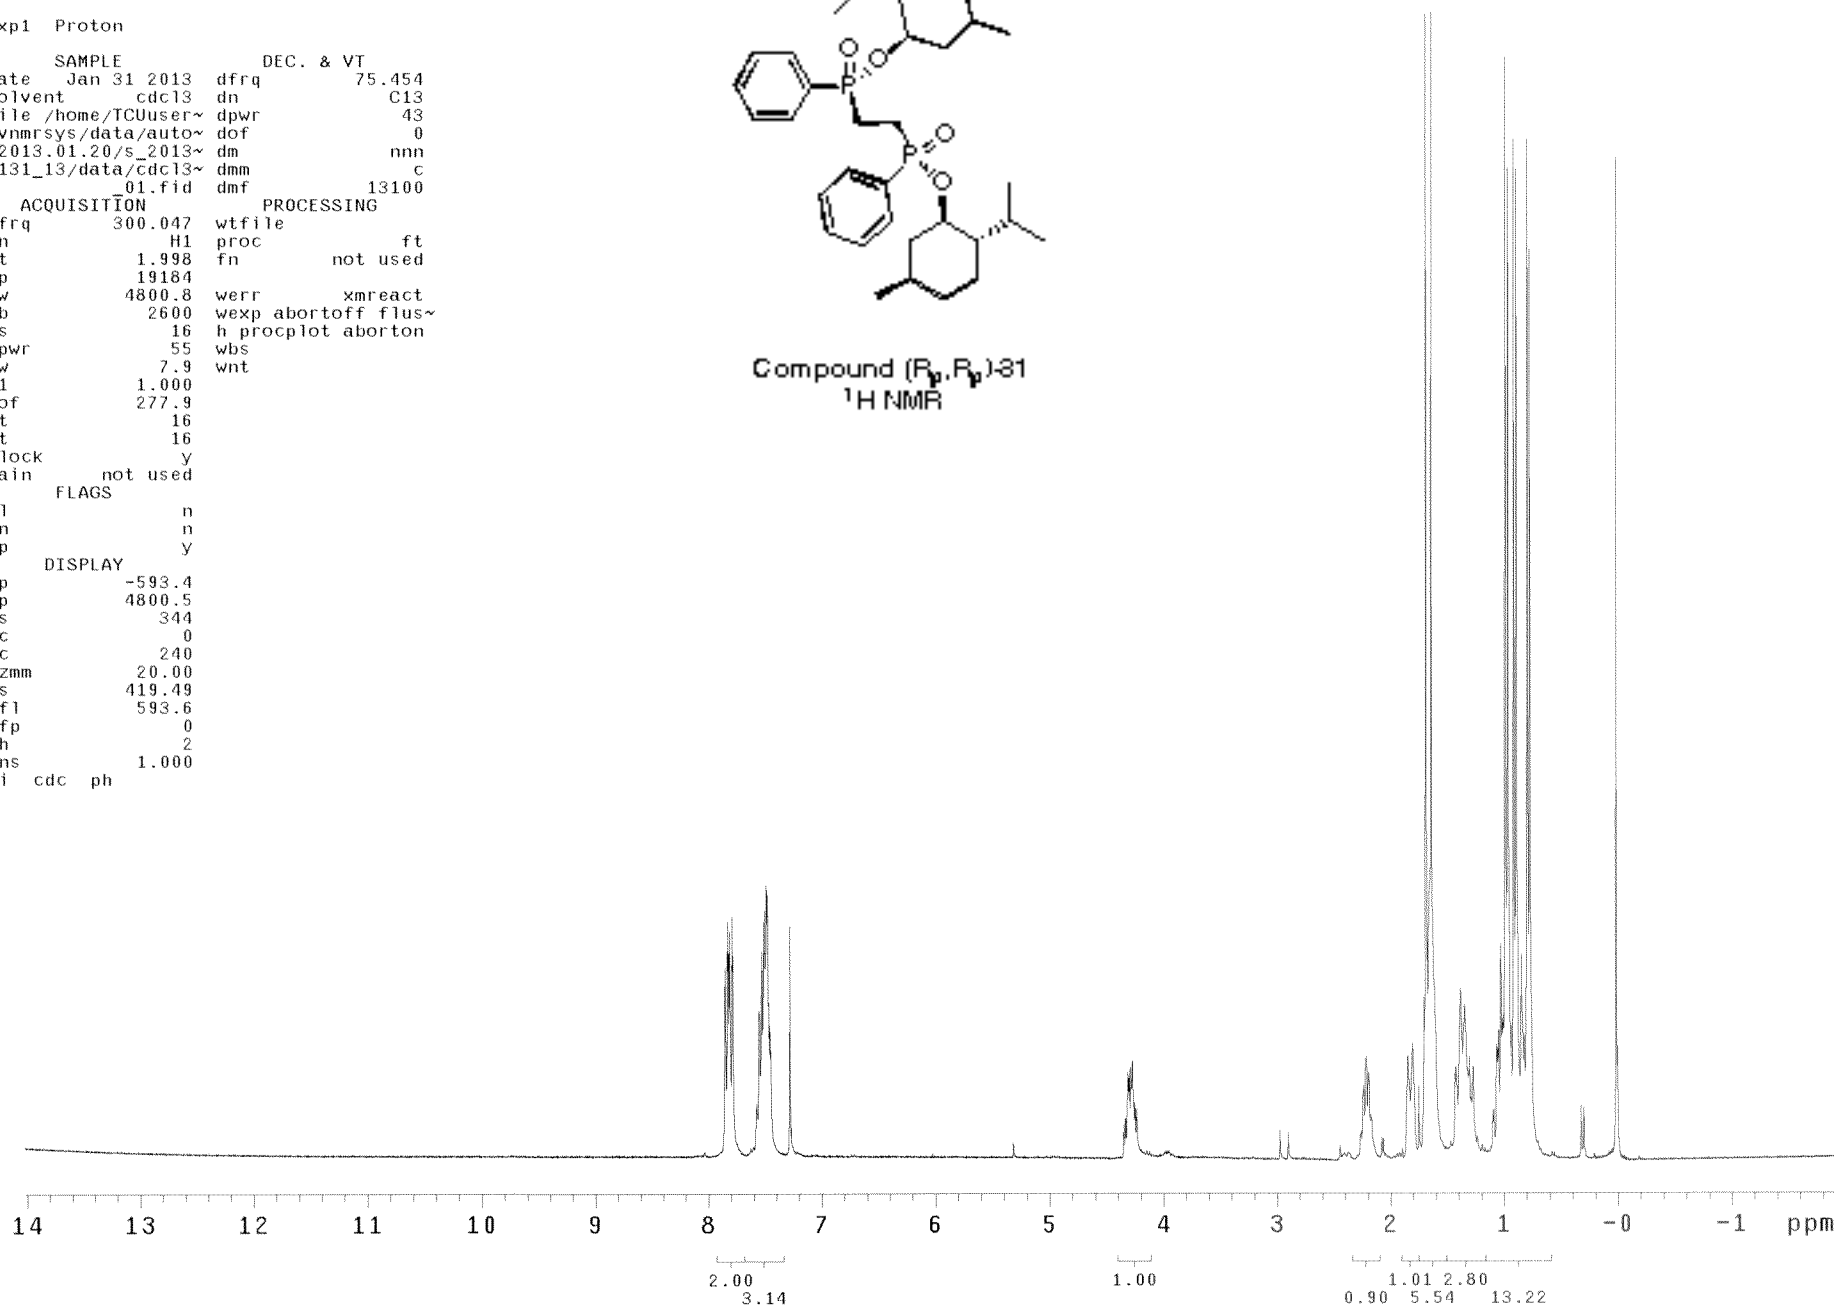

OB 927

exp1 Carbon

| SAMPLE              |                | SPECIAL    |          |
|---------------------|----------------|------------|----------|
| date                | Jan 31 2013    | temp       | not used |
| solvent             | cdc13          | gain       | 20       |
| file                | /home/TCUuser~ | spin       | 20       |
| /vnmrsys/data/auto~ |                | hst        | 0.008    |
| _2013.01.20/s_2013~ |                | pw90       | 18.500   |
| 0131_14/data/cdc13~ |                | alfa       | 10.000   |
| 07.fid              |                | FLAGS      |          |
| ACQUISITION         |                | PROCESSING |          |
| sw                  | 18115.9        | il         | n        |
| at                  | 1.301          | in         | n        |
| np                  | 47120          | dp         | y        |
| fb                  | 10000          | hs         | nn       |
| bs                  | 64             | lb         | 0.50     |
| d1                  | 2.000          | fn         | not used |
| nt                  | 800            | DISPLAY    |          |
| ct                  | 800            | sp         | -1135.5  |
| TRANSMITTER         |                | wp         | 18115.4  |
| tn                  | C13            | rf1        | 1136.1   |
| sfrq                | 75.454         | rfp        | 0        |
| tof                 | 766.0          | rp         | 23.6     |
| tpwr                | 58             | lp         | -181.3   |
| pw                  | 9.250          | PLOT       |          |
| DECOUPLER           |                | wc         | 250      |
| dn                  | H1             | sc         | 0        |
| dof                 | 0              | vs         | 228      |
| dm                  | yyy            | th         | 6        |
| dmm                 | w              | ai         | cdc ph   |
| dpwr                | 35             |            |          |
| dmf                 | 6700           |            |          |

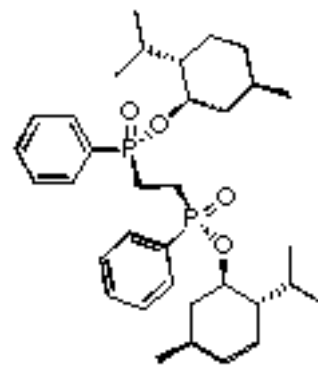

Compound (R<sub>p</sub>,R<sub>p</sub>)-31  
13C NMR

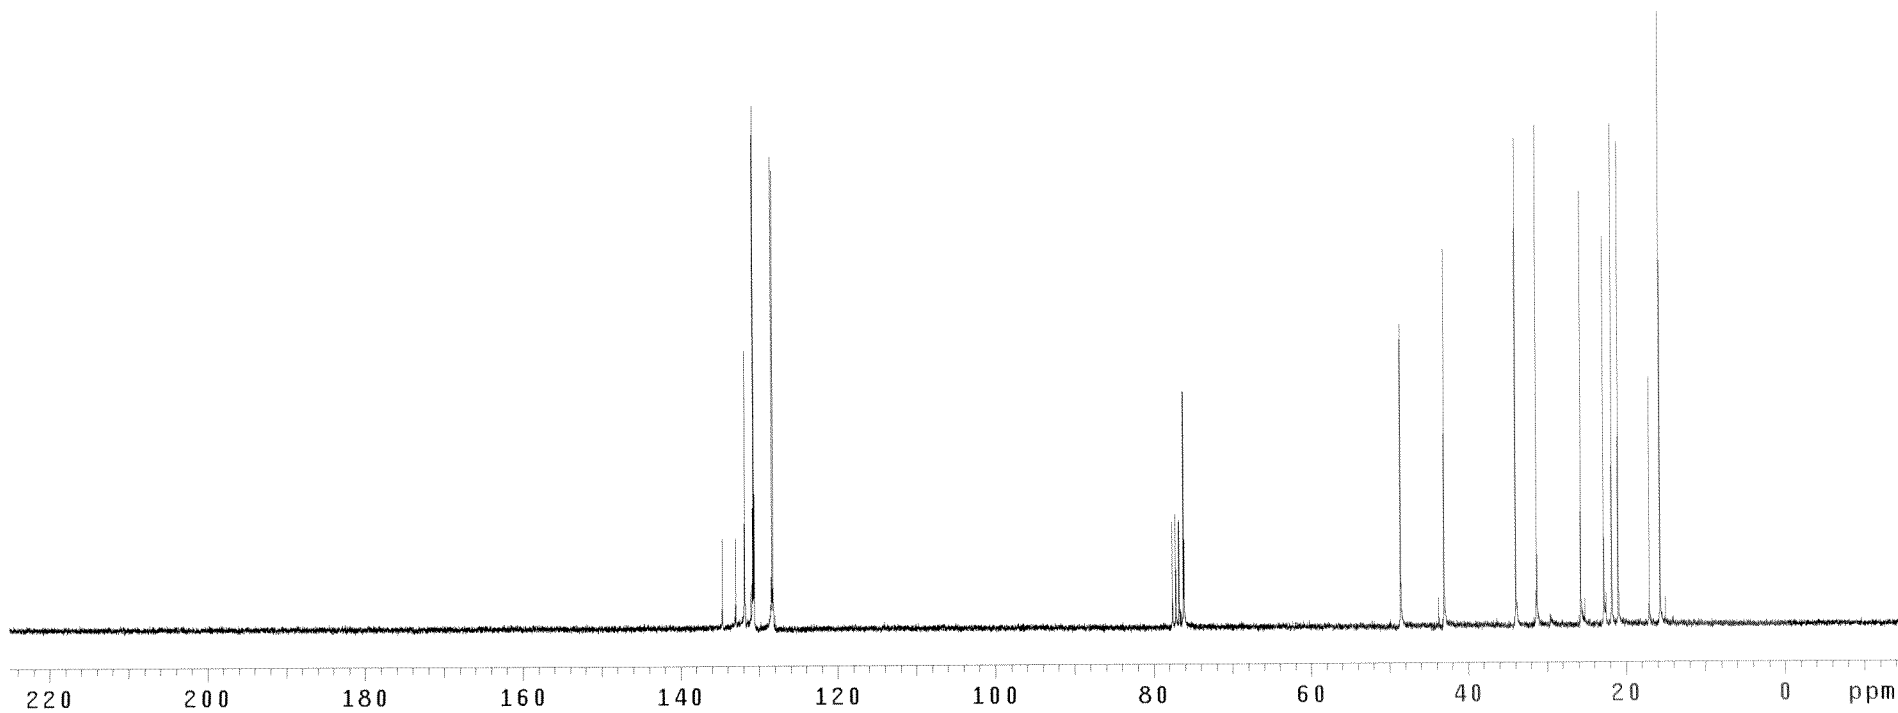

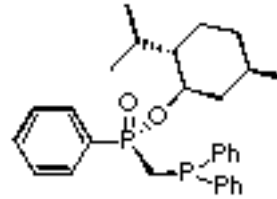

Compound (Sp)-32  
<sup>31</sup>P/H NMR decoupled

Current Data Parameters  
 NAME OB 1719f2 pure  
 EXPNO 1  
 PROCNO 1

F2 - Acquisition Parameters  
 Date\_ 20140919  
 Time 18.02  
 INSTRUM spect  
 PROBHD 5 mm PABBO BB/  
 PULPROG zgpg30  
 TD 65536  
 SOLVENT CDCl3  
 NS 16  
 DS 4  
 SWH 64102.563 Hz  
 FIDRES 0.978127 Hz  
 AQ 0.5111808 sec  
 RG 203.57  
 DW 7.800 usec  
 DE 6.50 usec  
 TE 295.7 K  
 D1 2.00000000 sec  
 D11 0.03000000 sec  
 TD0 1

==== CHANNEL f1 =====  
 SFO1 161.9674942 MHz  
 NUC1 31P  
 P1 14.25 usec  
 PLW1 15.00000000 W

==== CHANNEL f2 =====  
 SFO2 400.1316005 MHz  
 NUC2 1H  
 CPDPRG[2] waltz16  
 PCPD2 90.00 usec  
 PLW2 10.00000000 W  
 PLW12 0.31604999 W  
 PLW13 0.25600001 W

F2 - Processing parameters  
 SI 32768  
 SF 161.9755930 MHz  
 WDW EM  
 SSB 0  
 LB 1.00 Hz  
 GB 0  
 PC 1.40

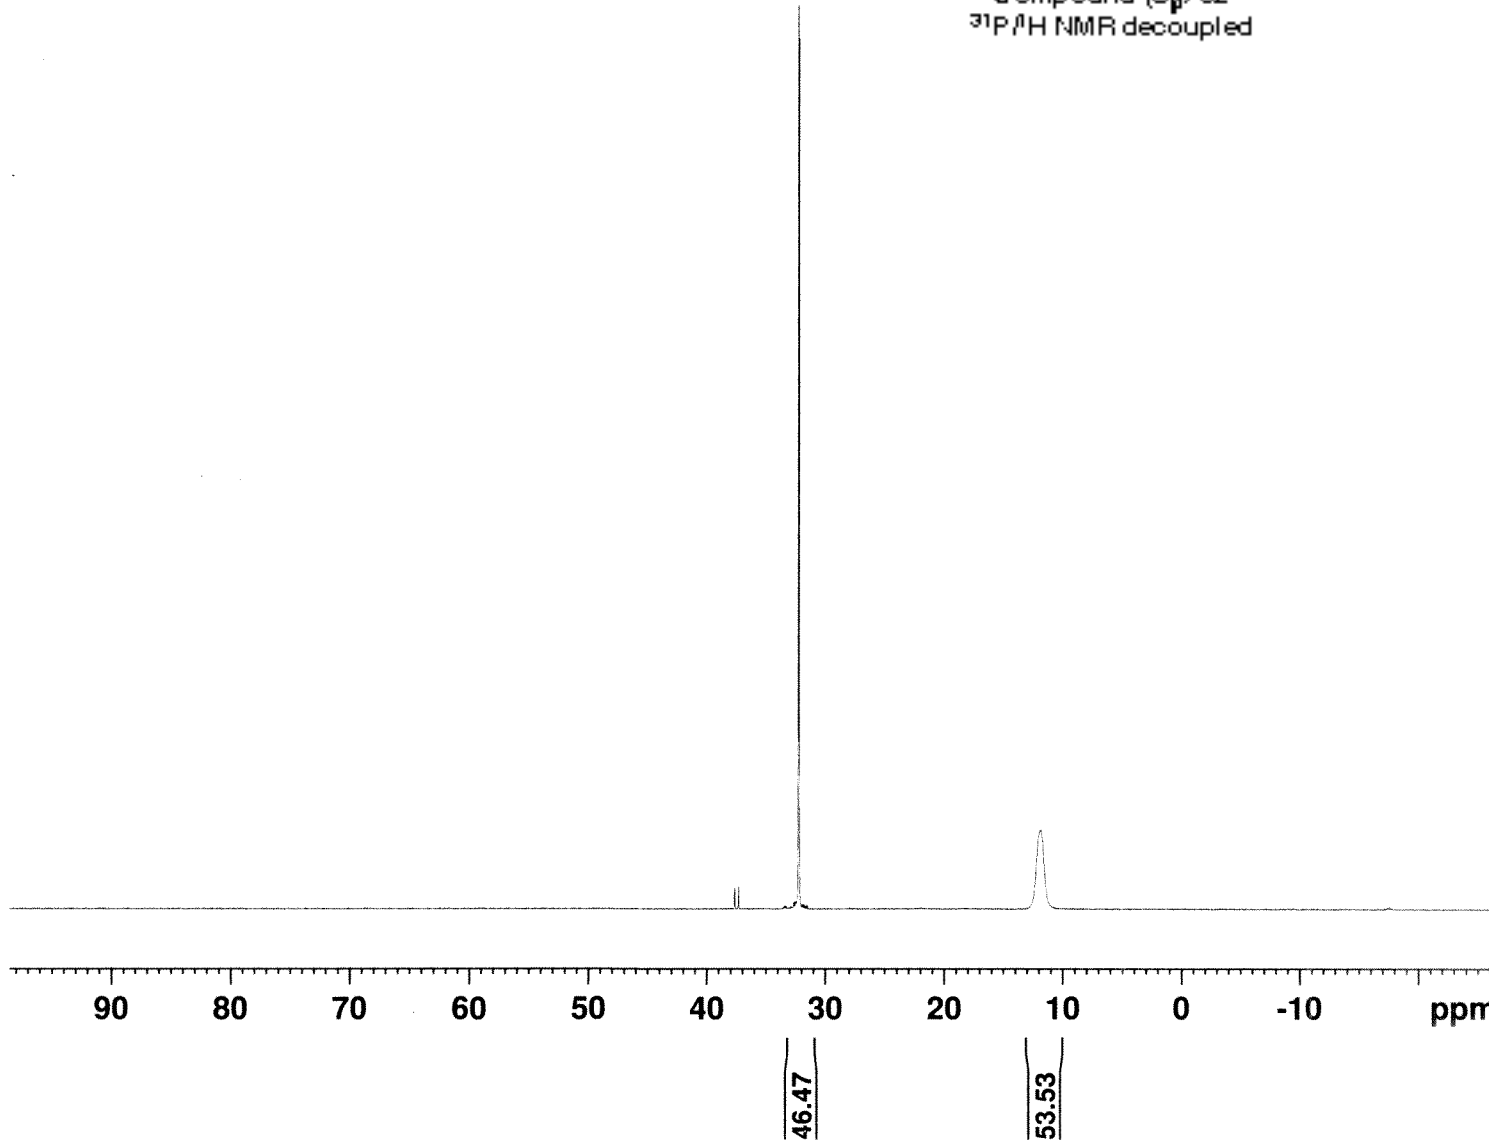

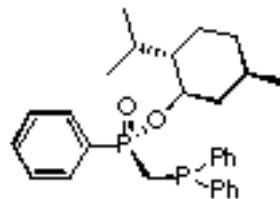

Compound (Sp)-32  
<sup>31</sup>P/<sup>1</sup>H NMR coupled

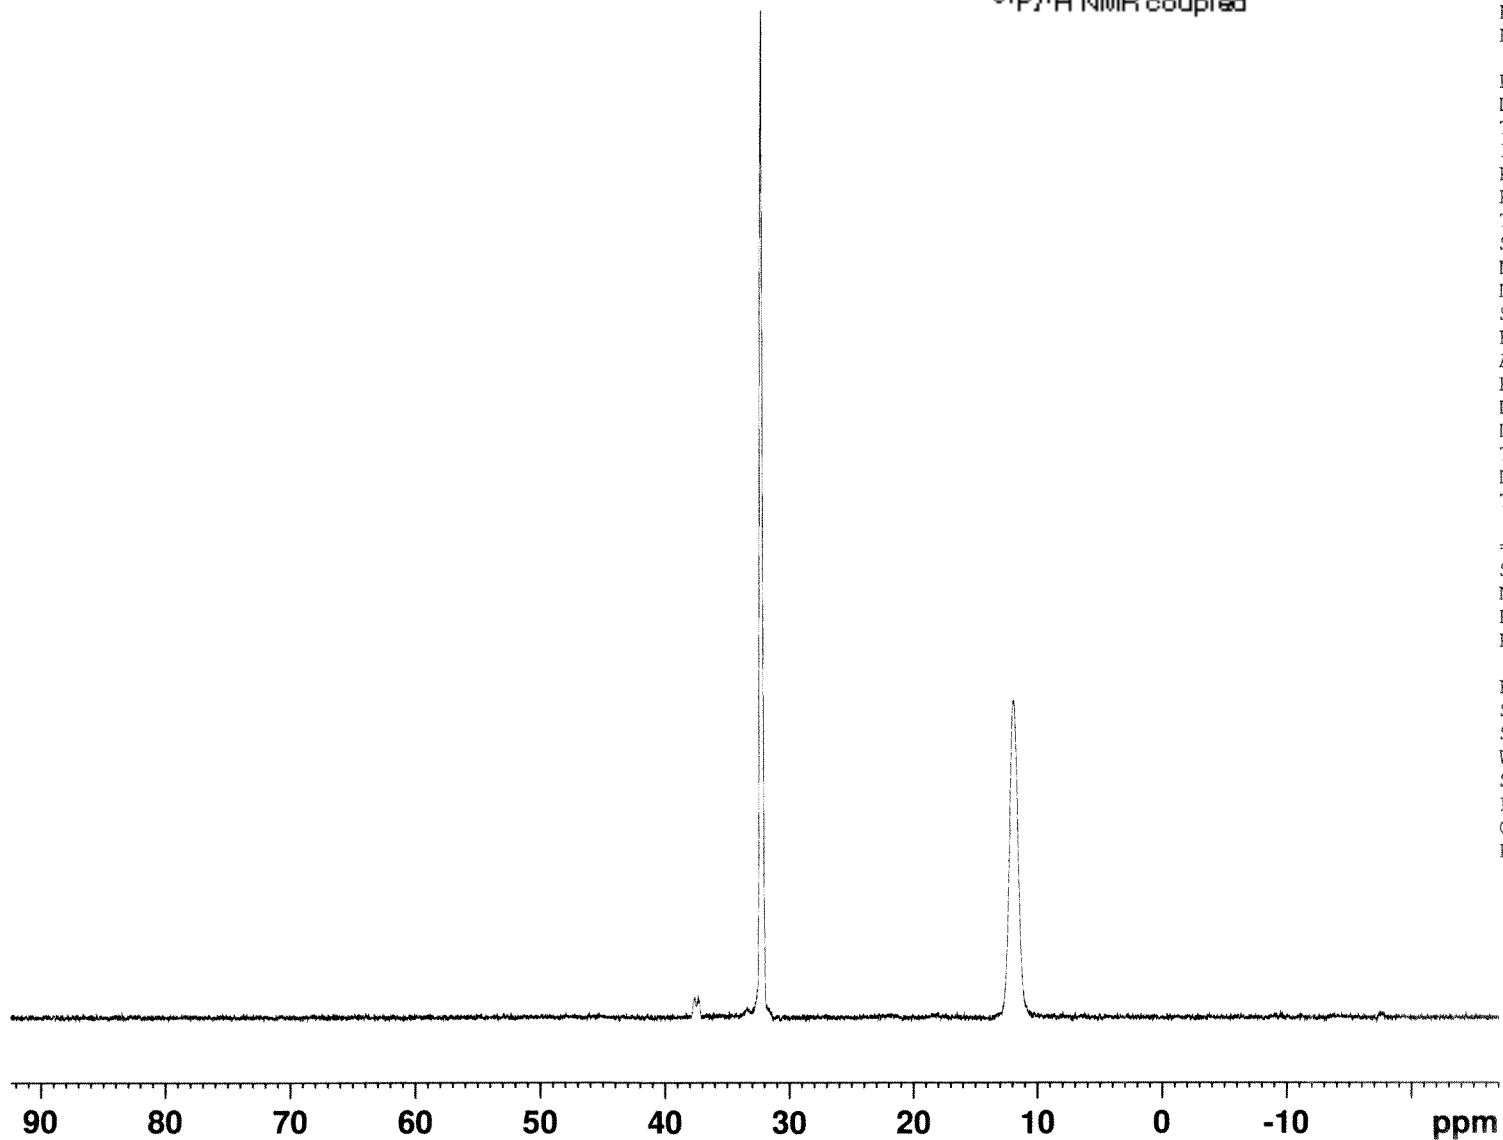

Current Data Parameters  
 NAME OB 1719f2 pure  
 EXPNO 2  
 PROCNO 1

F2 - Acquisition Parameters  
 Date\_ 20140919  
 Time 18.04  
 INSTRUM spect  
 PROBHD 5 mm PABBO BB/  
 PULPROG zg30  
 TD 65536  
 SOLVENT CDC13  
 NS 32  
 DS 4  
 SWH 64102.563 Hz  
 FIDRES 0.978127 Hz  
 AQ 0.5111808 sec  
 RG 203.57  
 DW 7.800 usec  
 DE 6.50 usec  
 TE 295.2 K  
 D1 2.00000000 sec  
 TD0 1

==== CHANNEL f1 =====  
 SF01 161.9674942 MHz  
 NUC1 31P  
 P1 14.25 usec  
 PLW1 15.00000000 W

F2 - Processing parameters  
 SI 32768  
 SF 161.9755930 MHz  
 WDW EM  
 SSB 0  
 LB 1.00 Hz  
 GB 0  
 PC 1.40

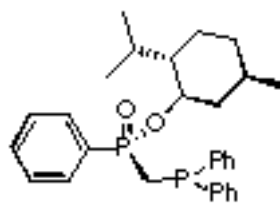

Compound (S<sub>P</sub>)-82  
<sup>1</sup>H NMR

Current Data Parameters  
 NAME OB 1719f2 pure  
 EXPNO 3  
 PROCNO 1

F2 - Acquisition Parameters  
 Date\_ 20140919  
 Time 18.07  
 INSTRUM spect  
 PROBHD 5 mm PABBO BB/  
 PULPROG zg30  
 TD 65536  
 SOLVENT CDC13  
 NS 12  
 DS 2  
 SWH 8012.820 Hz  
 FIDRES 0.122266 Hz  
 AQ 4.0894465 sec  
 RG 16.39  
 DW 62.400 usec  
 DE 6.50 usec  
 TE 295.2 K  
 D1 1.00000000 sec  
 TDO 1

==== CHANNEL f1 =====  
 SFO1 400.1324710 MHz  
 NUC1 1H  
 P1 10.00 usec  
 PLW1 25.00300026 W

F2 - Processing parameters  
 SI 65536  
 SF 400.1300000 MHz  
 WDW EM  
 SSB 0  
 LB 0.30 Hz  
 GB 0  
 PC 1.00

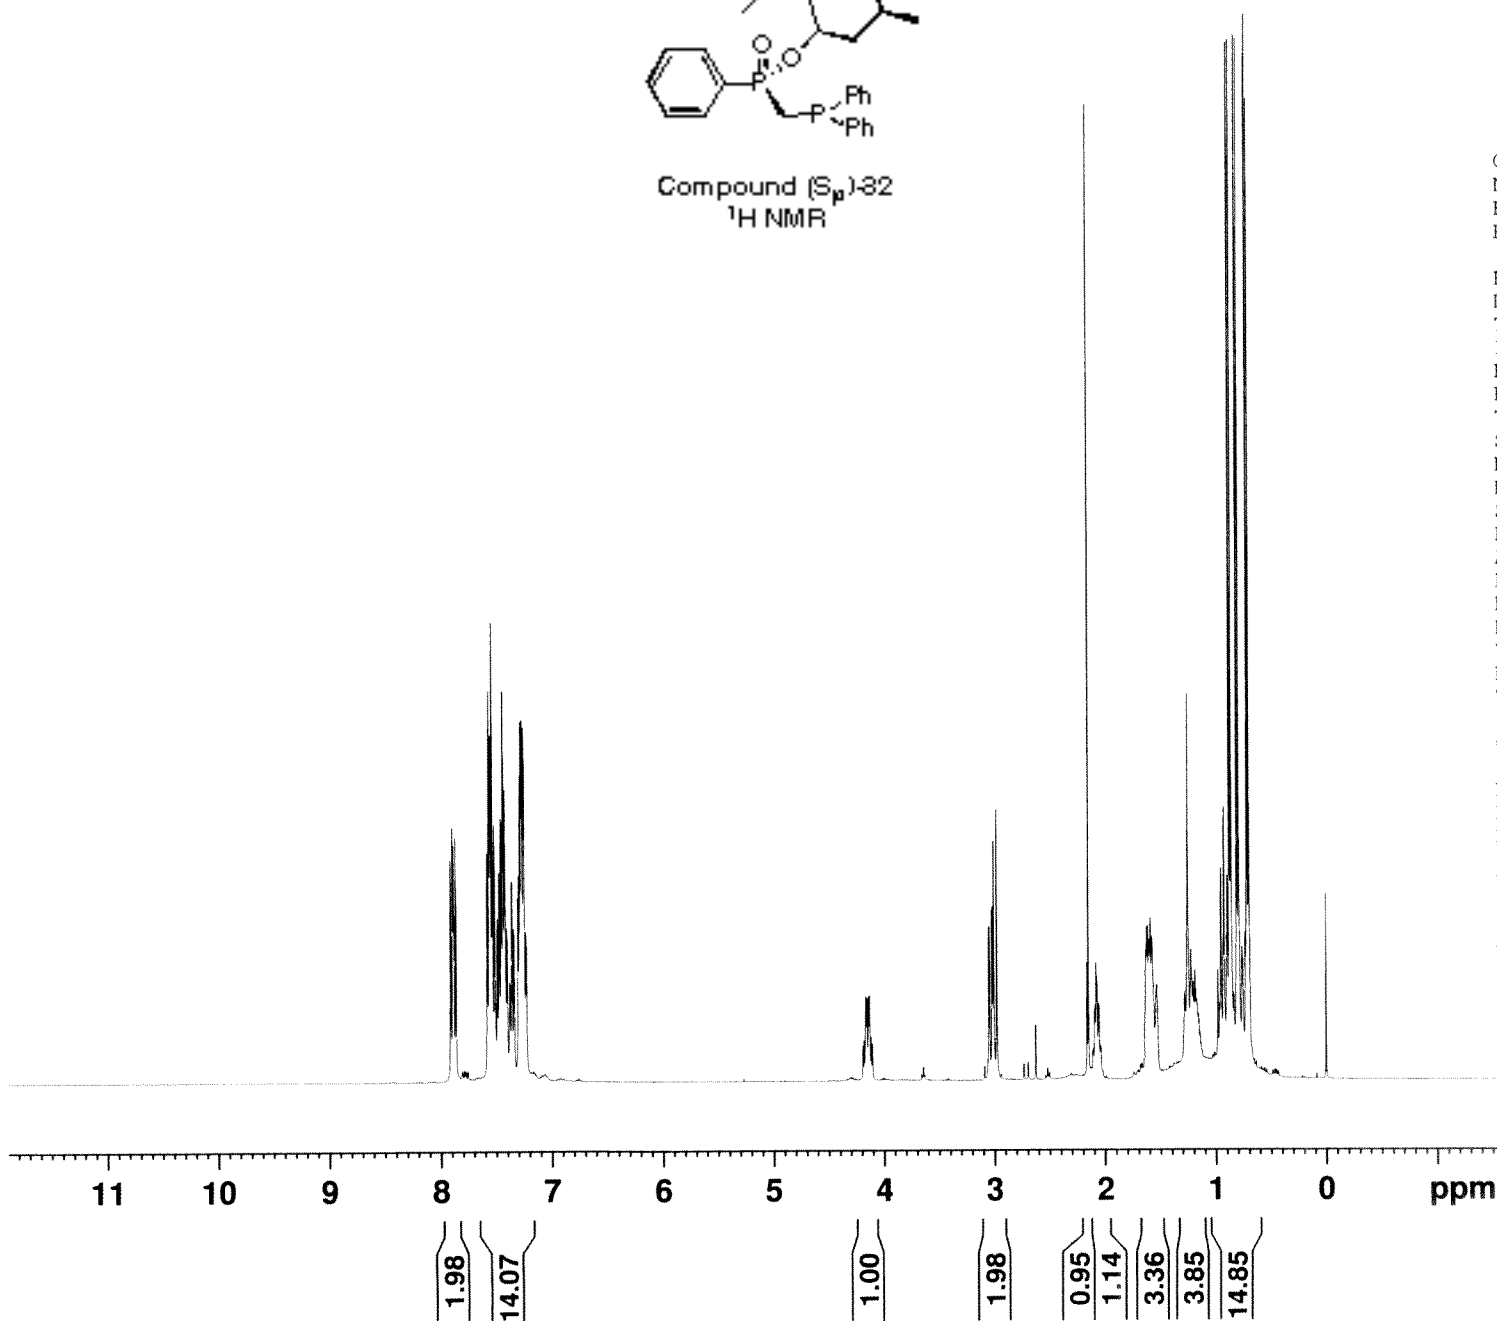

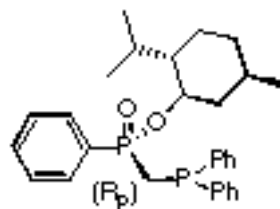

Compound (S<sub>p</sub>)-82  
<sup>13</sup>C NMR

Current Data Parameters  
 NAME OB 1719f2 pure  
 EXPNO 4  
 PROCNO 1

F2 - Acquisition Parameters  
 Date\_ 20140919  
 Time 18.56  
 INSTRUM spect  
 PROBHD 5 mm PABBO BB/  
 PULPROG zgpg30  
 TD 65536  
 SOLVENT CDCl3  
 NS 817  
 DS 4  
 SWH 24038.461 Hz  
 FIDRES 0.366798 Hz  
 AQ 1.3631488 sec  
 RG 203.57  
 DW 20.800 usec  
 DE 6.50 usec  
 TE 296.2 K  
 D1 2.0000000 sec  
 D11 0.03000000 sec  
 TD0 1

==== CHANNEL f1 =====  
 SFO1 100.6228293 MHz  
 NUC1 13C  
 P1 10.00 usec  
 PLW1 45.00000000 W

==== CHANNEL f2 =====  
 SFO2 400.1316005 MHz  
 NUC2 1H  
 CPDPRG[2] waltz16  
 PCPD2 90.00 usec  
 PLW2 10.00000000 W  
 PLW12 0.31604999 W  
 PLW13 0.25600001 W

F2 - Processing parameters  
 SI 32768  
 SF 100.6127685 MHz  
 WDW EM  
 SSB 0  
 LB 1.00 Hz  
 GB 0  
 PC 1.40

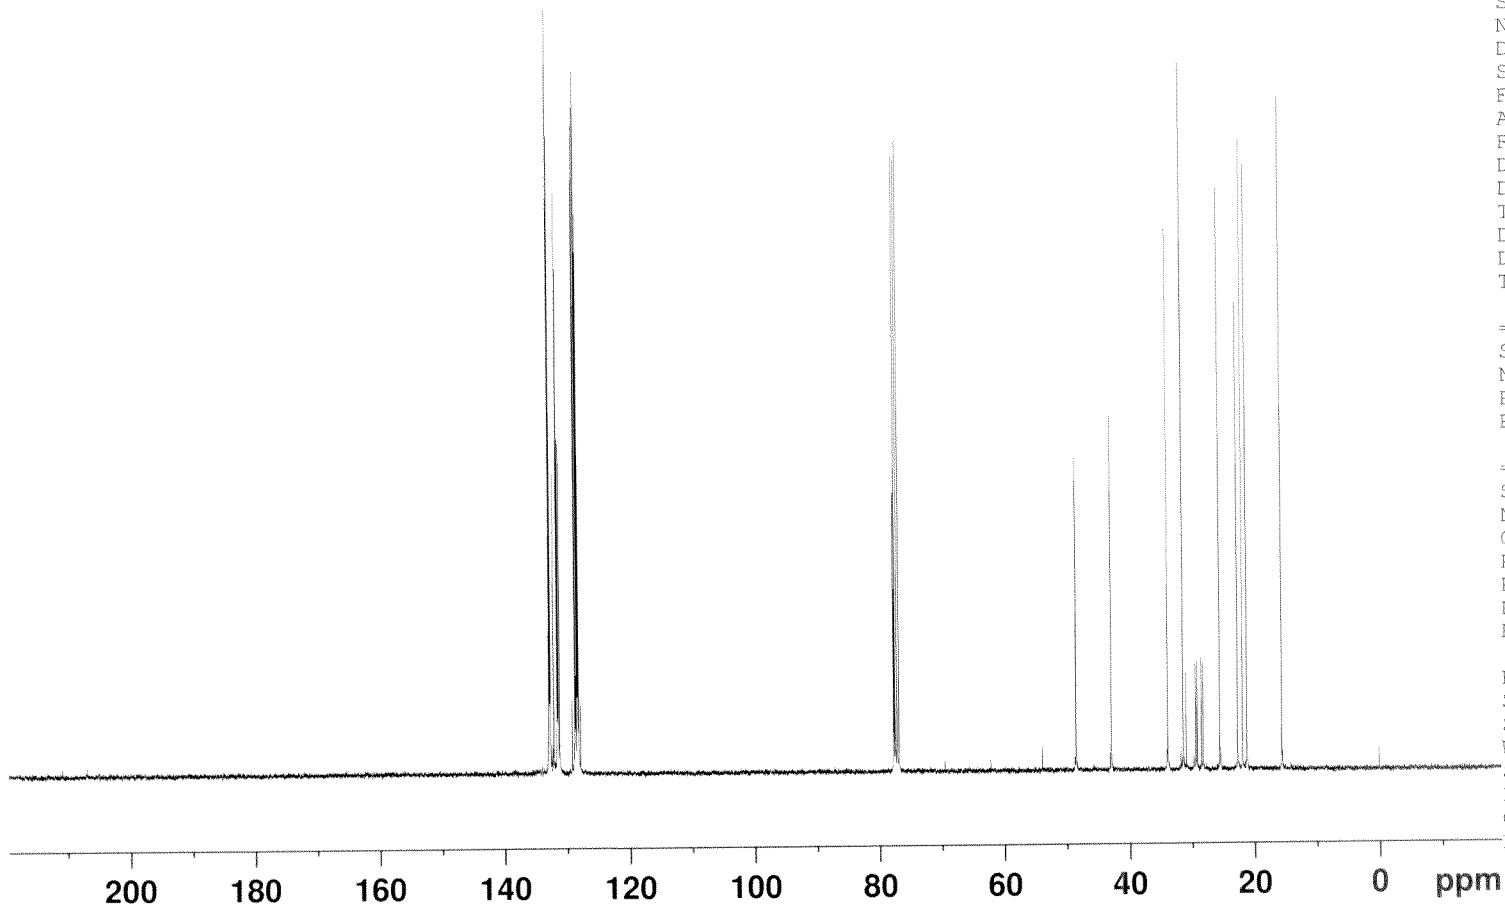



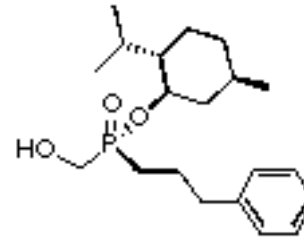

Compound (R<sub>p</sub>)-33  
<sup>31</sup>P/<sup>1</sup>H NMR decoupled

Current Data Parameters  
 NAME OB 2092 after column  
 EXPNO 1  
 PROCNO 1

F2 - Acquisition Parameters  
 Date\_ 20150626  
 Time 17.17  
 INSTRUM spect  
 PROBHD 5 mm PABBO BB/  
 PULPROG zgpg30  
 TD 65536  
 SOLVENT CDCl3  
 NS 16  
 DS 4  
 SWH 64102.563 Hz  
 FIDRES 0.978127 Hz  
 AQ 0.5111808 sec  
 RG 203.57  
 DW 7.800 usec  
 DE 6.50 usec  
 TE 294.5 K  
 D1 2.00000000 sec  
 D11 0.03000000 sec  
 TD0 1

==== CHANNEL f1 =====  
 SFO1 161.9674942 MHz  
 NUC1 31P  
 P1 14.25 usec  
 PLW1 15.00000000 W

==== CHANNEL f2 =====  
 SFO2 400.1316005 MHz  
 NUC2 1H  
 CPDPRG[2] waltz16  
 PCPD2 90.00 usec  
 PLW2 10.00000000 W  
 PLW12 0.31604999 W  
 PLW13 0.25600001 W

F2 - Processing parameters  
 SI 32768  
 SF 161.9755930 MHz  
 WDW EM  
 SSB 0  
 LB 1.00 Hz  
 GB 0  
 PC 1.40

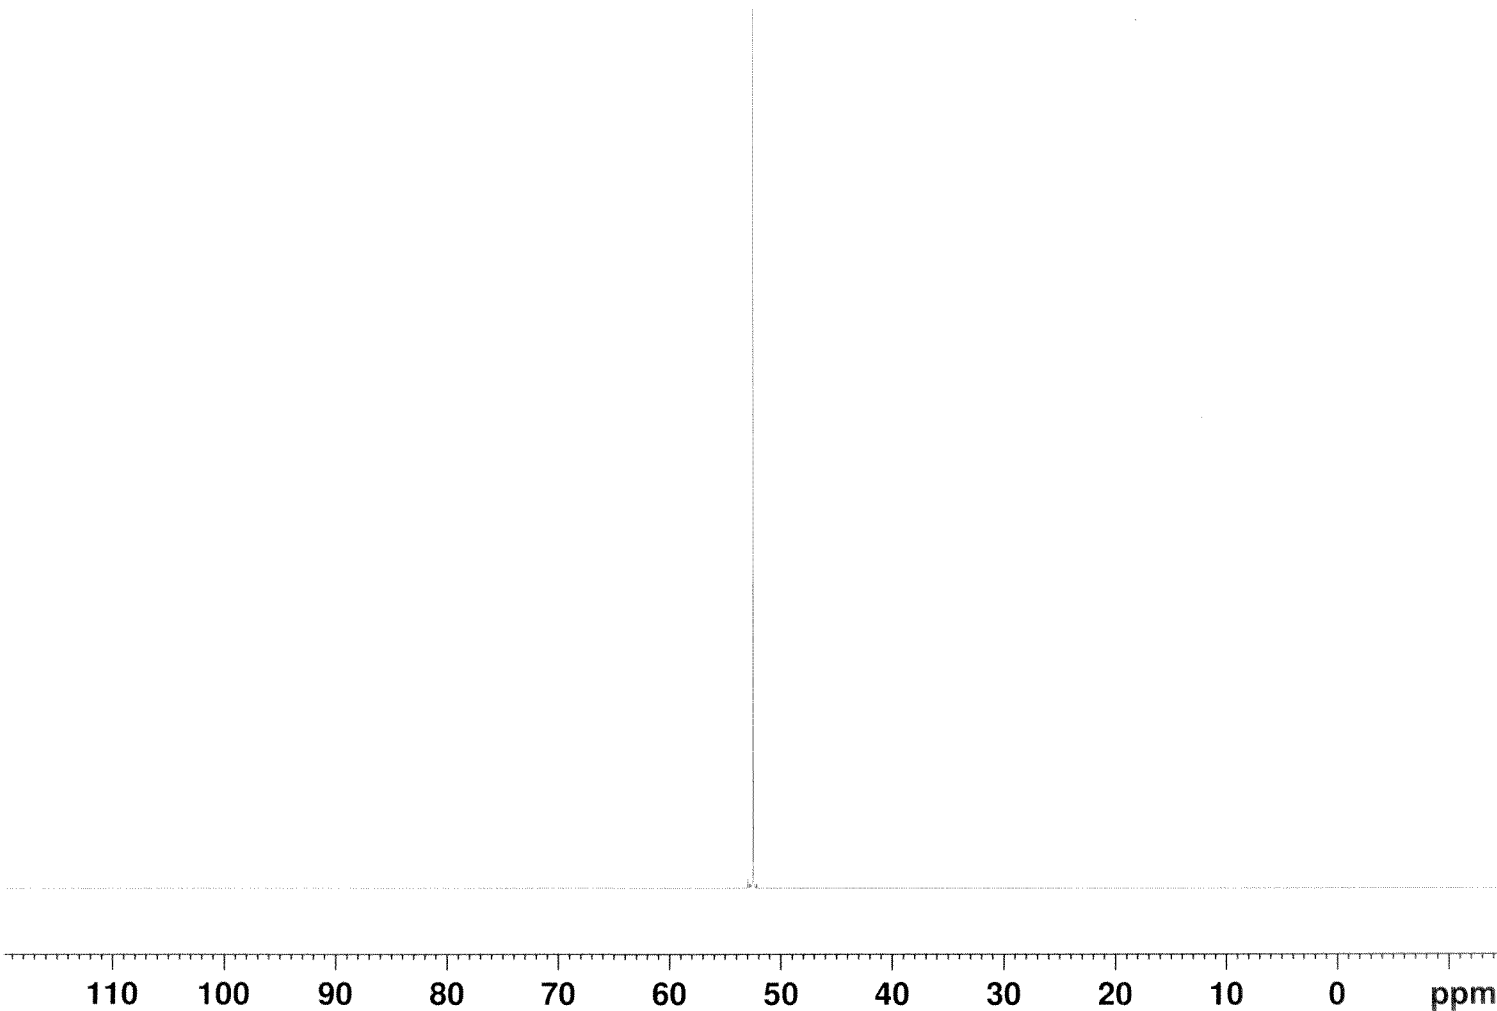

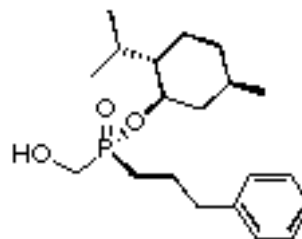

Compound (Rp)-33  
<sup>31</sup>P/<sup>1</sup>H NMR coupled

Current Data Parameters  
 NAME OB 2092 after column  
 EXPNO 2  
 PROCNO 1

F2 - Acquisition Parameters  
 Date\_ 20150626  
 Time 17.19  
 INSTRUM spect  
 PROBHD 5 mm PABBO BB/  
 PULPROG zg30  
 TD 65536  
 SOLVENT CDCl3  
 NS 32  
 DS 4  
 SWH 64102.563 Hz  
 FIDRES 0.978127 Hz  
 AQ 0.5111808 sec  
 RG 203.57  
 DW 7.800 usec  
 DE 6.50 usec  
 TE 294.1 K  
 D1 2.00000000 sec  
 TD0 1

==== CHANNEL f1 =====  
 SF01 161.9674942 MHz  
 NUC1 31P  
 P1 14.25 usec  
 PLW1 15.00000000 W

F2 - Processing parameters  
 SI 32768  
 SF 161.9755930 MHz  
 WDW EM  
 SSB 0  
 LB 1.00 Hz  
 GB 0  
 PC 1.40

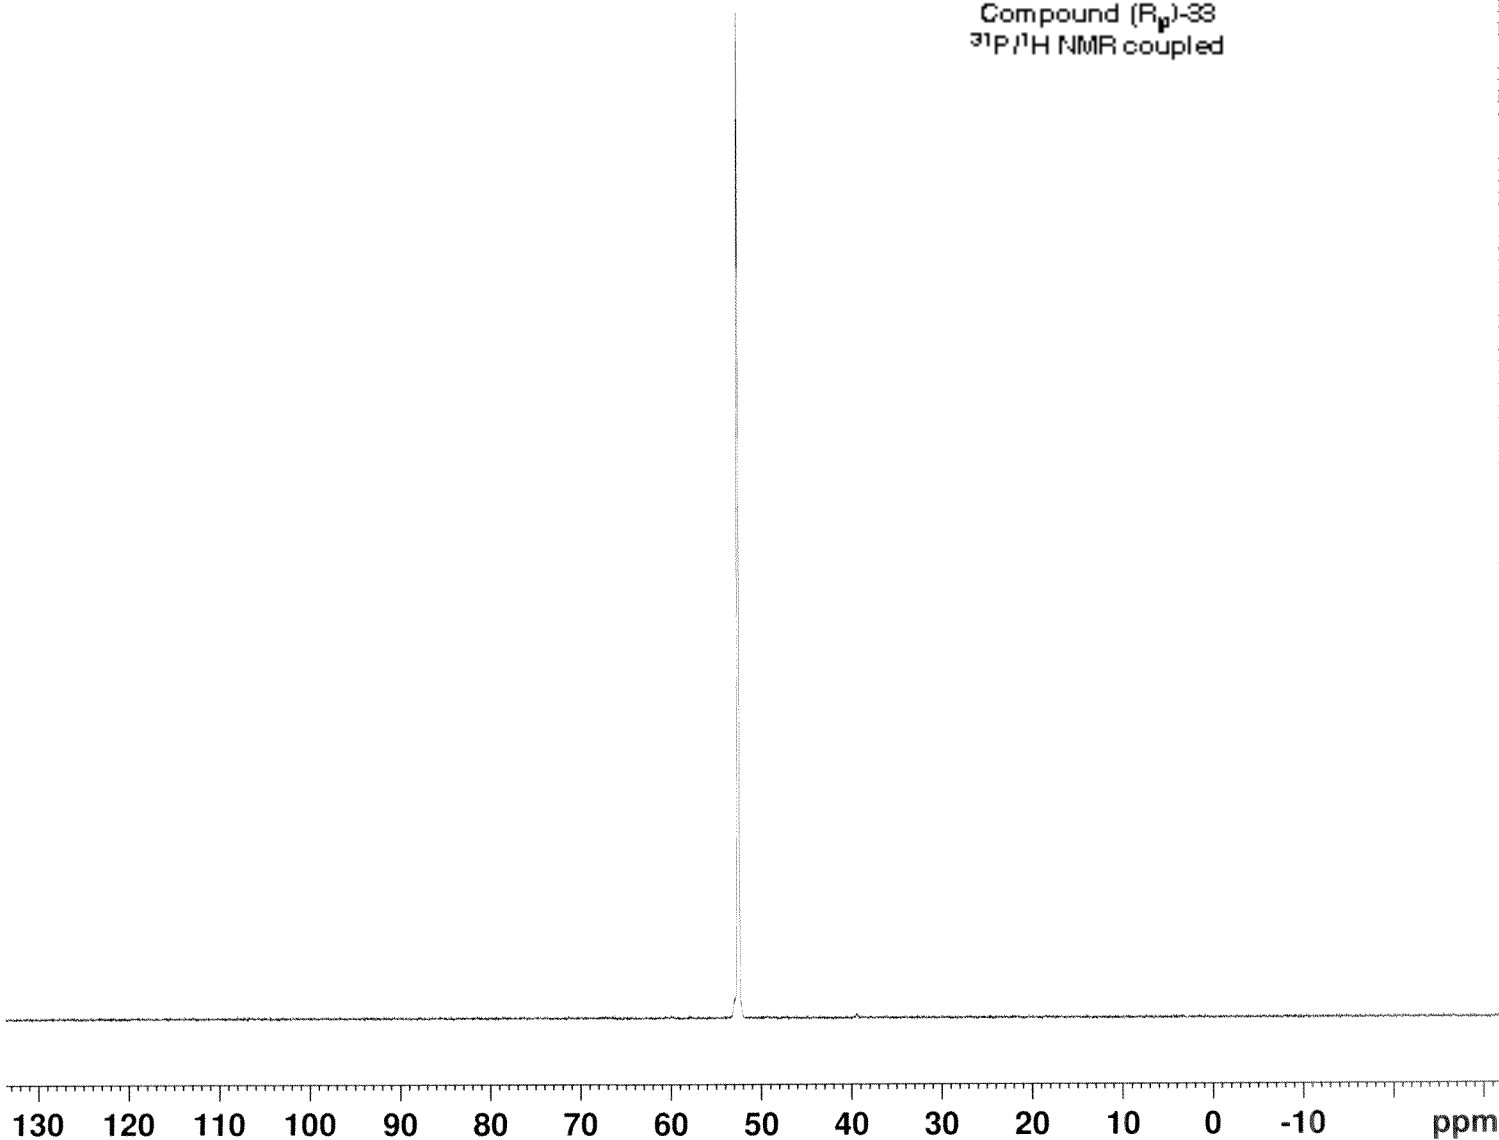

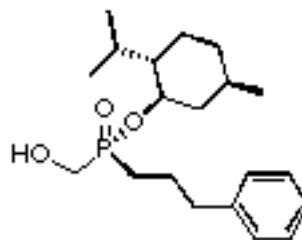

Compound (R<sub>p</sub>)-33  
<sup>1</sup>H NMR

Current Data Parameters  
 NAME OB 2092 after column  
 EXPNO 3  
 PROCNO 1

F2 - Acquisition Parameters  
 Date\_ 20150626  
 Time 17.20  
 INSTRUM spect  
 PROBHD 5 mm PABBO BB/  
 PULPROG zg30  
 TD 65536  
 SOLVENT CDCl3  
 NS 8  
 DS 2  
 SWH 8012.820 Hz  
 FIDRES 0.122266 Hz  
 AQ 4.0894465 sec  
 RG 13.94  
 DW 62.400 usec  
 DE 6.50 usec  
 TE 294.0 K  
 D1 1.00000000 sec  
 TD0 1

===== CHANNEL f1 =====  
 SFO1 400.1324710 MHz  
 NUC1 1H  
 P1 10.00 usec  
 PLW1 25.00300026 W

F2 - Processing parameters  
 SI 65536  
 SF 400.1300000 MHz  
 WDW EM  
 SSB 0  
 LB 0.30 Hz  
 GB 0  
 PC 1.00

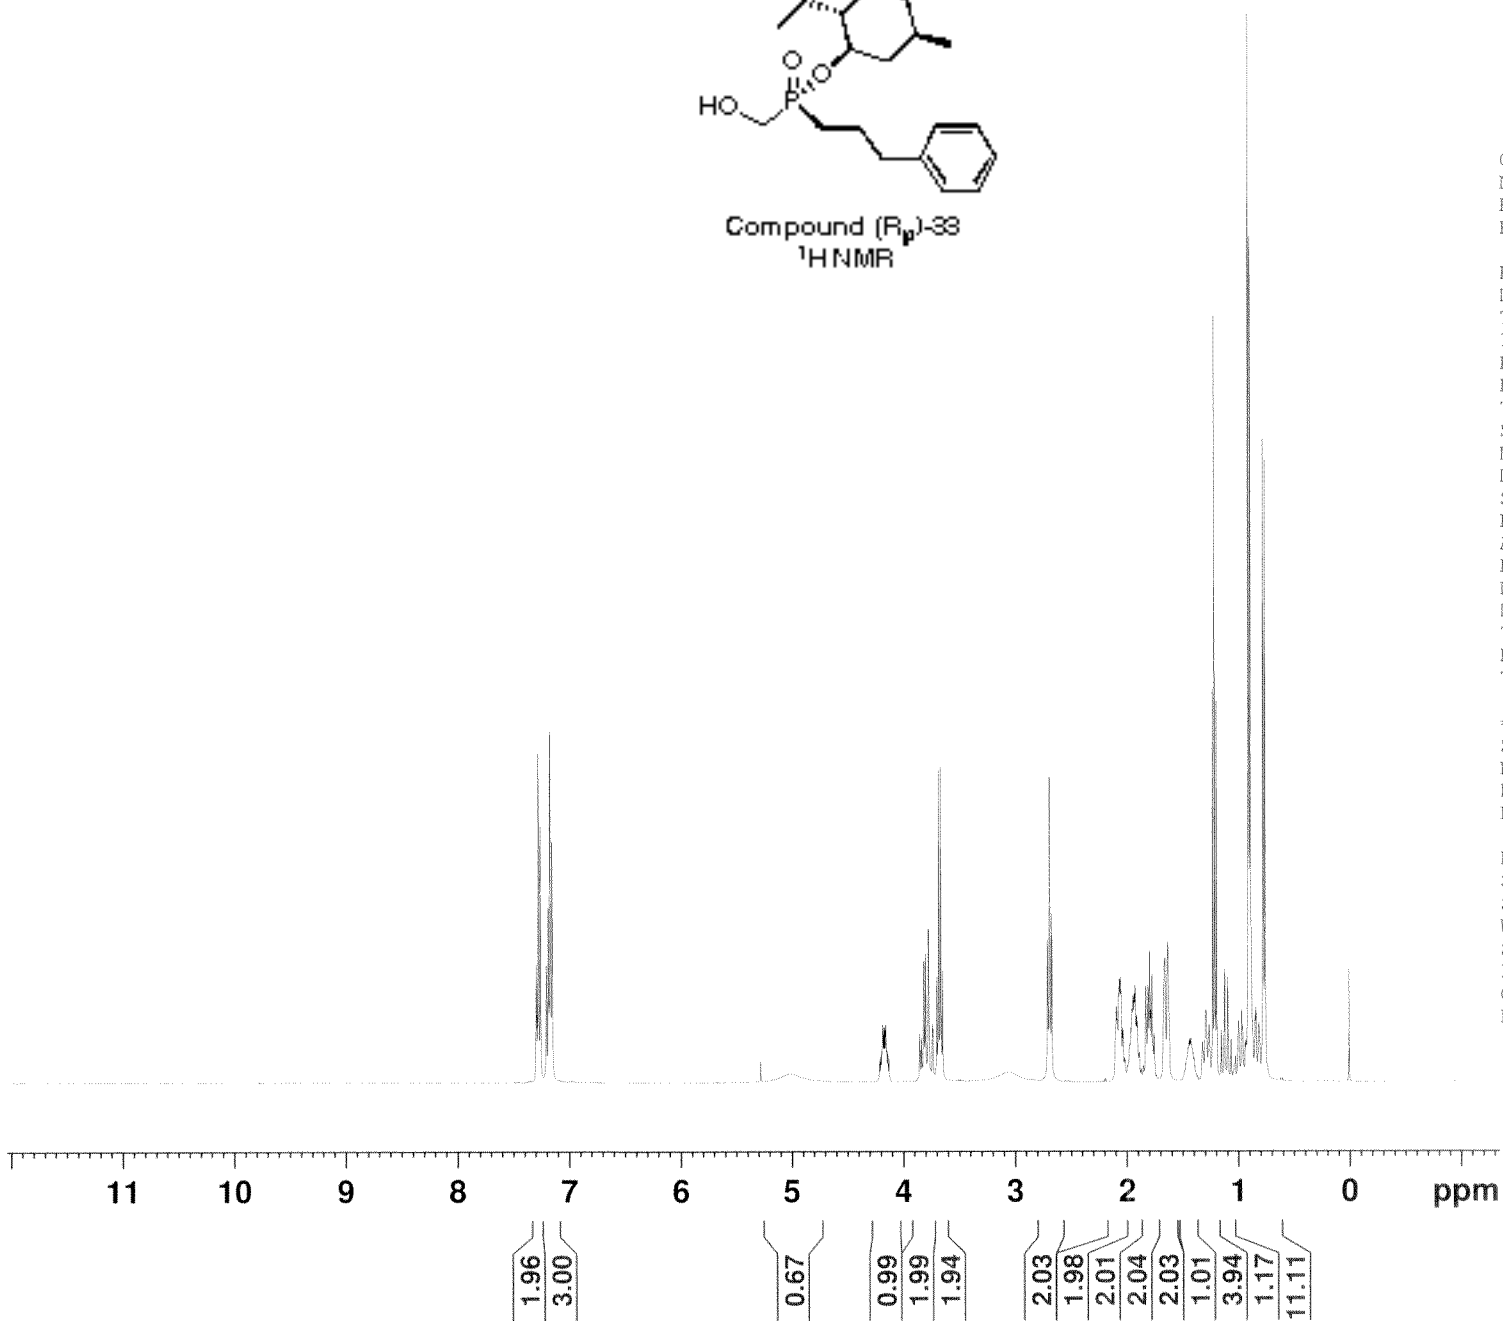

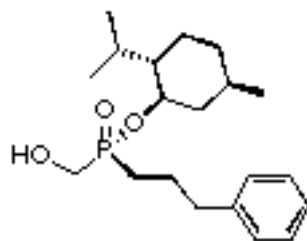

Compound (R<sub>p</sub>)-33  
<sup>13</sup>C NMR

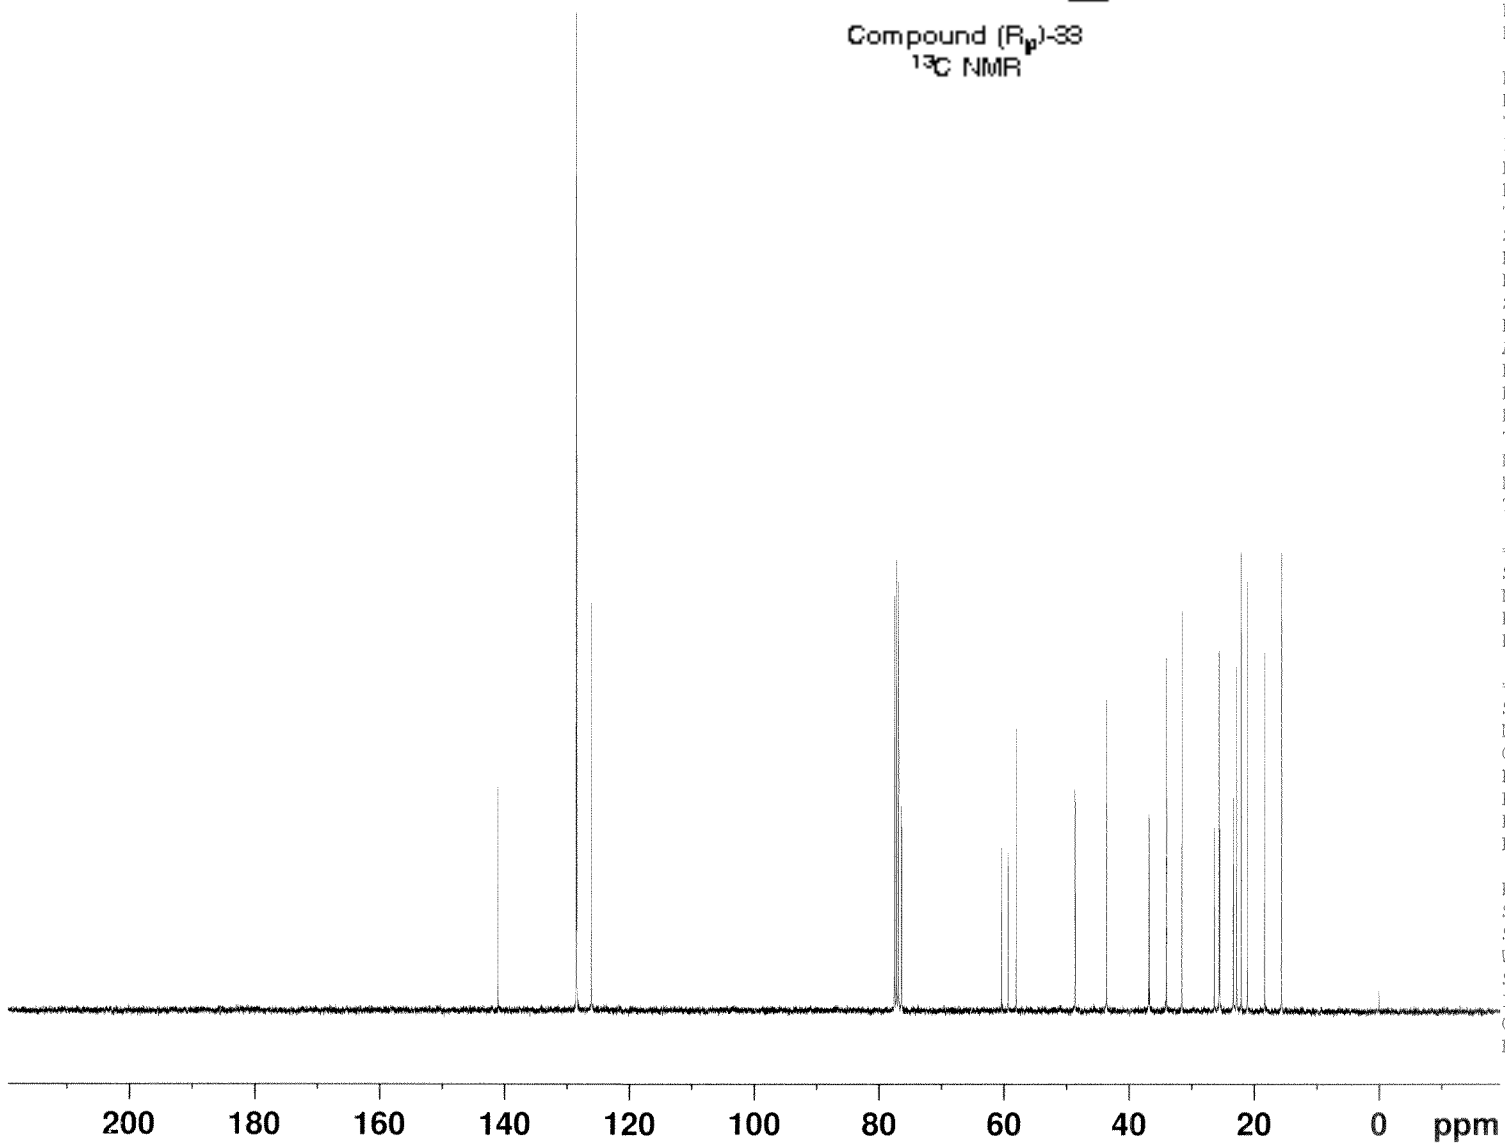

Current Data Parameters  
 NAME OB 2092 after column  
 EXPNO 4  
 PROCNO 1

F2 - Acquisition Parameters  
 Date\_ 20150626  
 Time 17.30  
 INSTRUM spect  
 PROBHD 5 mm PABBO BB/  
 PULPROG zgpg30  
 TD 65536  
 SOLVENT CDCl3  
 NS 124  
 DS 4  
 SWH 24038.461 Hz  
 FIDRES 0.366798 Hz  
 AQ 1.3631488 sec  
 RG 203.57  
 DW 20.800 usec  
 DE 6.50 usec  
 TE 294.8 K  
 D1 2.00000000 sec  
 D11 0.03000000 sec  
 TD0 1

==== CHANNEL f1 =====  
 SFO1 100.6228293 MHz  
 NUC1 13C  
 P1 10.00 usec  
 PLW1 45.00000000 W

==== CHANNEL f2 =====  
 SFO2 400.1316005 MHz  
 NUC2 1H  
 CPDPRG[2] waltz16  
 PCPD2 90.00 usec  
 PLW2 10.00000000 W  
 PLW12 0.31604999 W  
 PLW13 0.25600001 W

F2 - Processing parameters  
 SI 32768  
 SF 100.6127685 MHz  
 WDW EM  
 SSB 0  
 LB 1.00 Hz  
 GB 0  
 PC 1.40

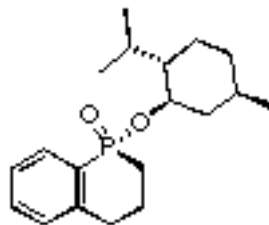

Compound (Rp)-34  
<sup>31</sup>P/<sup>1</sup>H NMR decoupled

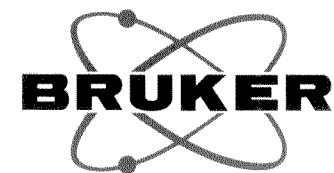

Current Data Parameters  
 NAME OB 2097 after column  
 EXPNO 1  
 PROCNO 1

F2 - Acquisition Parameters  
 Date\_ 20151201  
 Time 11.29  
 INSTRUM spect  
 PROBHD 5 mm PABBO BB/  
 PULPROG zgpg30  
 TD 65536  
 SOLVENT CDCl3  
 NS 16  
 DS 4  
 SWH 64102.563 Hz  
 FIDRES 0.978127 Hz  
 AQ 0.5111808 sec  
 RG 203.57  
 DW 7.800 usec  
 DE 6.50 usec  
 TE 291.9 K  
 D1 2.00000000 sec  
 D11 0.03000000 sec  
 TD0 1

==== CHANNEL f1 =====  
 SFO1 161.9674942 MHz  
 NUC1 31P  
 P1 14.25 usec  
 PLW1 15.00000000 W

==== CHANNEL f2 =====  
 SFO2 400.1316005 MHz  
 NUC2 1H  
 CPDPRG[2] waltz16  
 PCPD2 90.00 usec  
 PLW2 10.00000000 W  
 PLW12 0.31604999 W  
 PLW13 0.25600001 W

F2 - Processing parameters  
 SI 32768  
 SF 161.9755930 MHz  
 WDW EM  
 SSB 0  
 LB 1.00 Hz  
 GB 0  
 PC 1.40

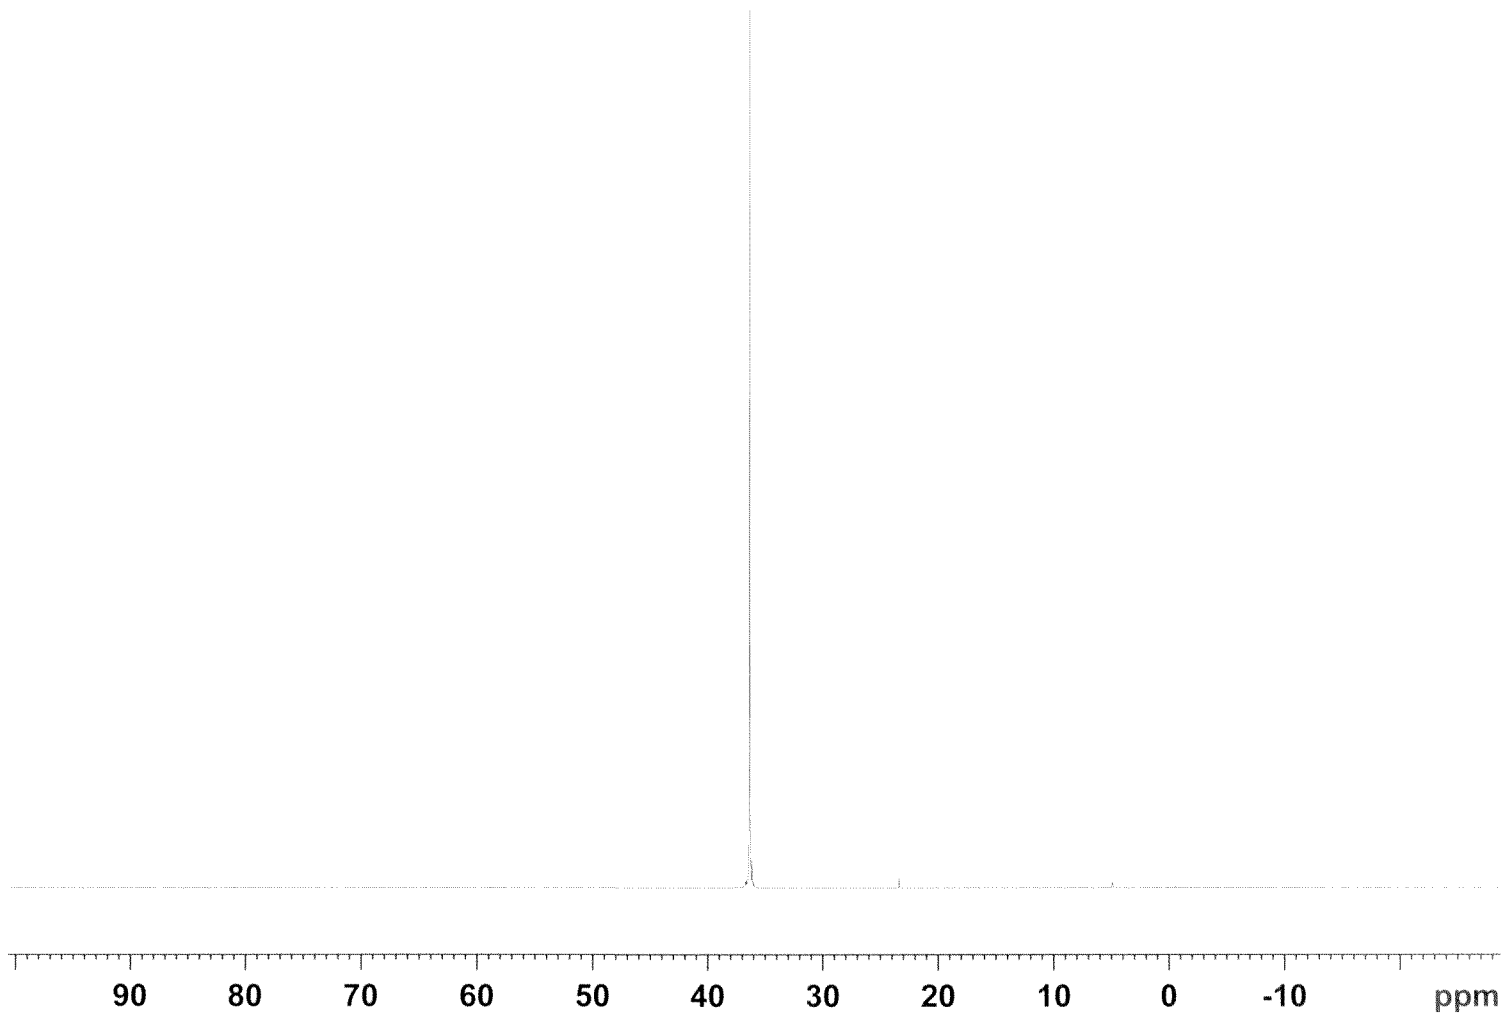

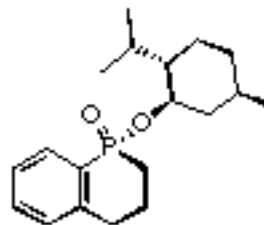

Compound (Rp)-34  
<sup>31</sup>P/<sup>1</sup>H NMR coupled

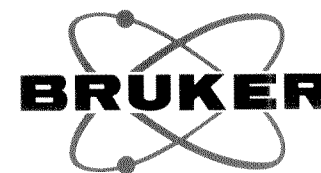

Current Data Parameters  
 NAME OB 2097 after column  
 EXPNO 2  
 PROCNO 1

F2 - Acquisition Parameters  
 Date\_ 20151201  
 Time\_ 11.31  
 INSTRUM spect  
 PROBHD 5 mm PABBO BB/  
 PULPROG zg30  
 TD 65536  
 SOLVENT CDC13  
 NS 32  
 DS 4  
 SWH 64102.563 Hz  
 FIDRES 0.978127 Hz  
 AQ 0.5111808 sec  
 RG 203.57  
 DW 7.800 usec  
 DE 6.50 usec  
 TE 291.3 K  
 D1 2.00000000 sec  
 TD0 1

==== CHANNEL f1 =====  
 SFO1 161.9674942 MHz  
 NUC1 31P  
 P1 14.25 usec  
 PLW1 15.00000000 W

F2 - Processing parameters  
 SI 32768  
 SF 161.9755930 MHz  
 WDW EM  
 SSB 0  
 LB 2.00 Hz  
 GB 0  
 PC 1.40

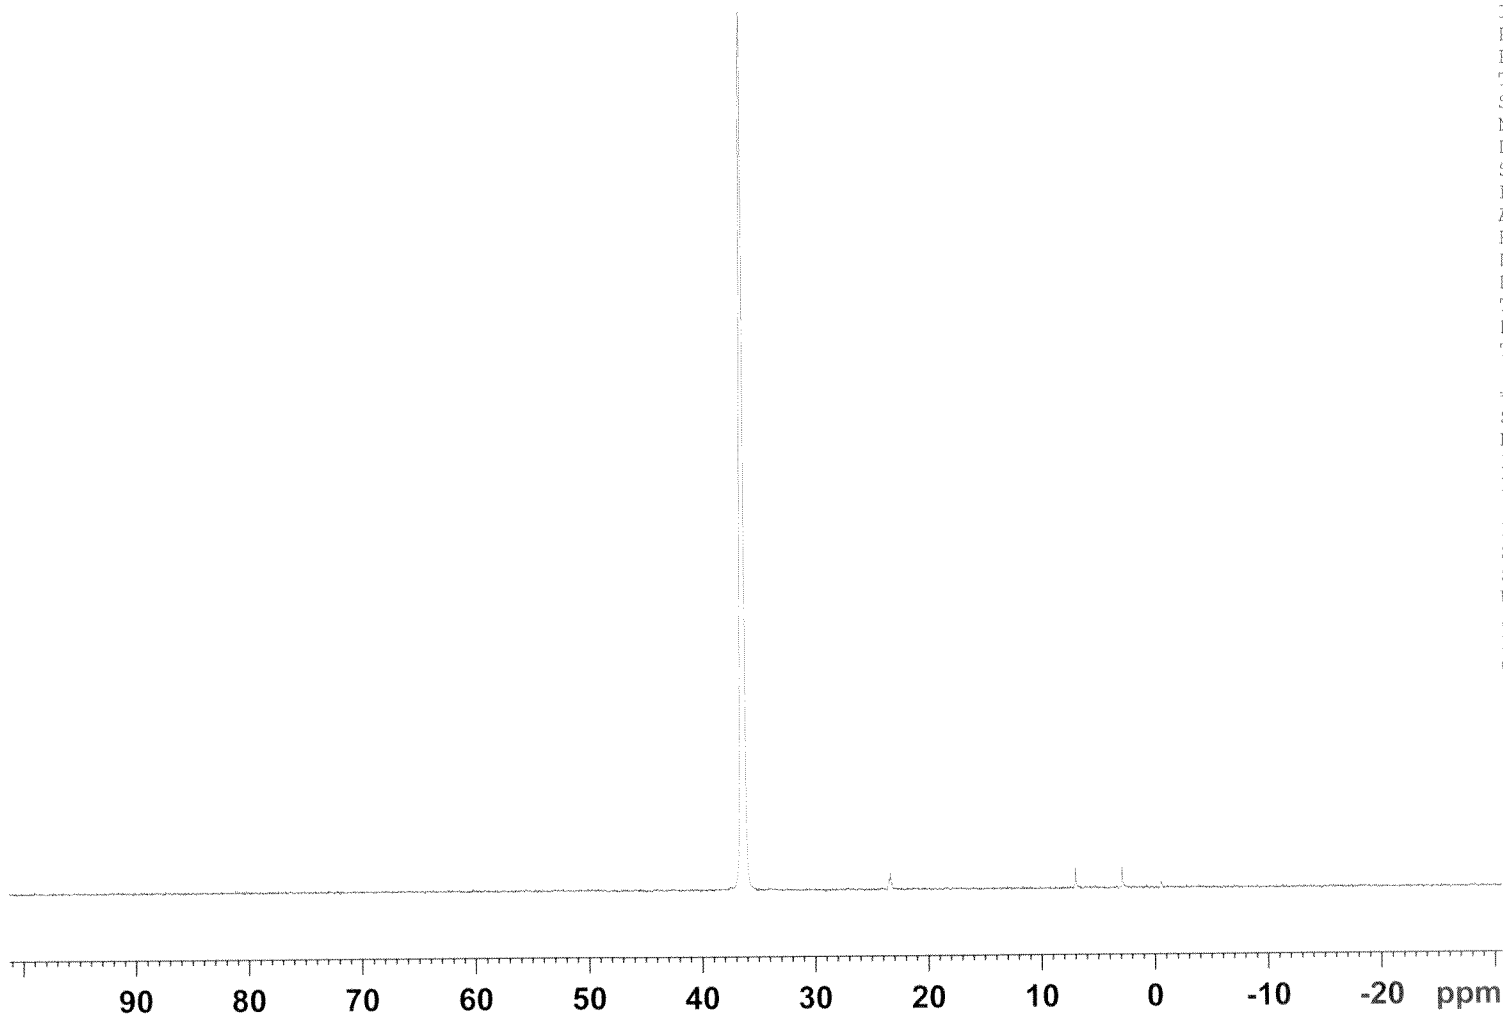

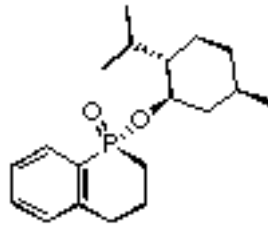

Compound (Rp)-34  
<sup>1</sup>H NMR

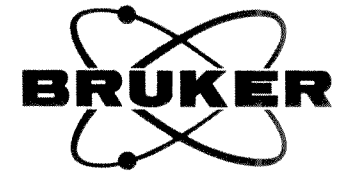

Current Data Parameters  
 NAME OB 2097 after column  
 EXPNO 3  
 PROCNO 1

F2 - Acquisition Parameters  
 Date\_ 20151201  
 Time\_ 11.33  
 INSTRUM spect  
 PROBHD 5 mm PABBO BB/  
 PULPROG zg30  
 TD 65536  
 SOLVENT CDC13  
 NS 16  
 DS 2  
 SWH 8012.820 Hz  
 FIDRES 0.122266 Hz  
 AQ 4.0894465 sec  
 RG 11.05  
 DW 62.400 usec  
 DE 6.50 usec  
 TE 291.3 K  
 D1 1.0000000 sec  
 TD0 1

==== CHANNEL f1 =====  
 SFO1 400.1324710 MHz  
 NUC1 1H  
 P1 10.00 usec  
 PLW1 25.00300026 W

F2 - Processing parameters  
 SI 65536  
 SF 400.1300000 MHz  
 WDW EM  
 SSB 0  
 LB 0.30 Hz  
 GB 0  
 PC 1.00

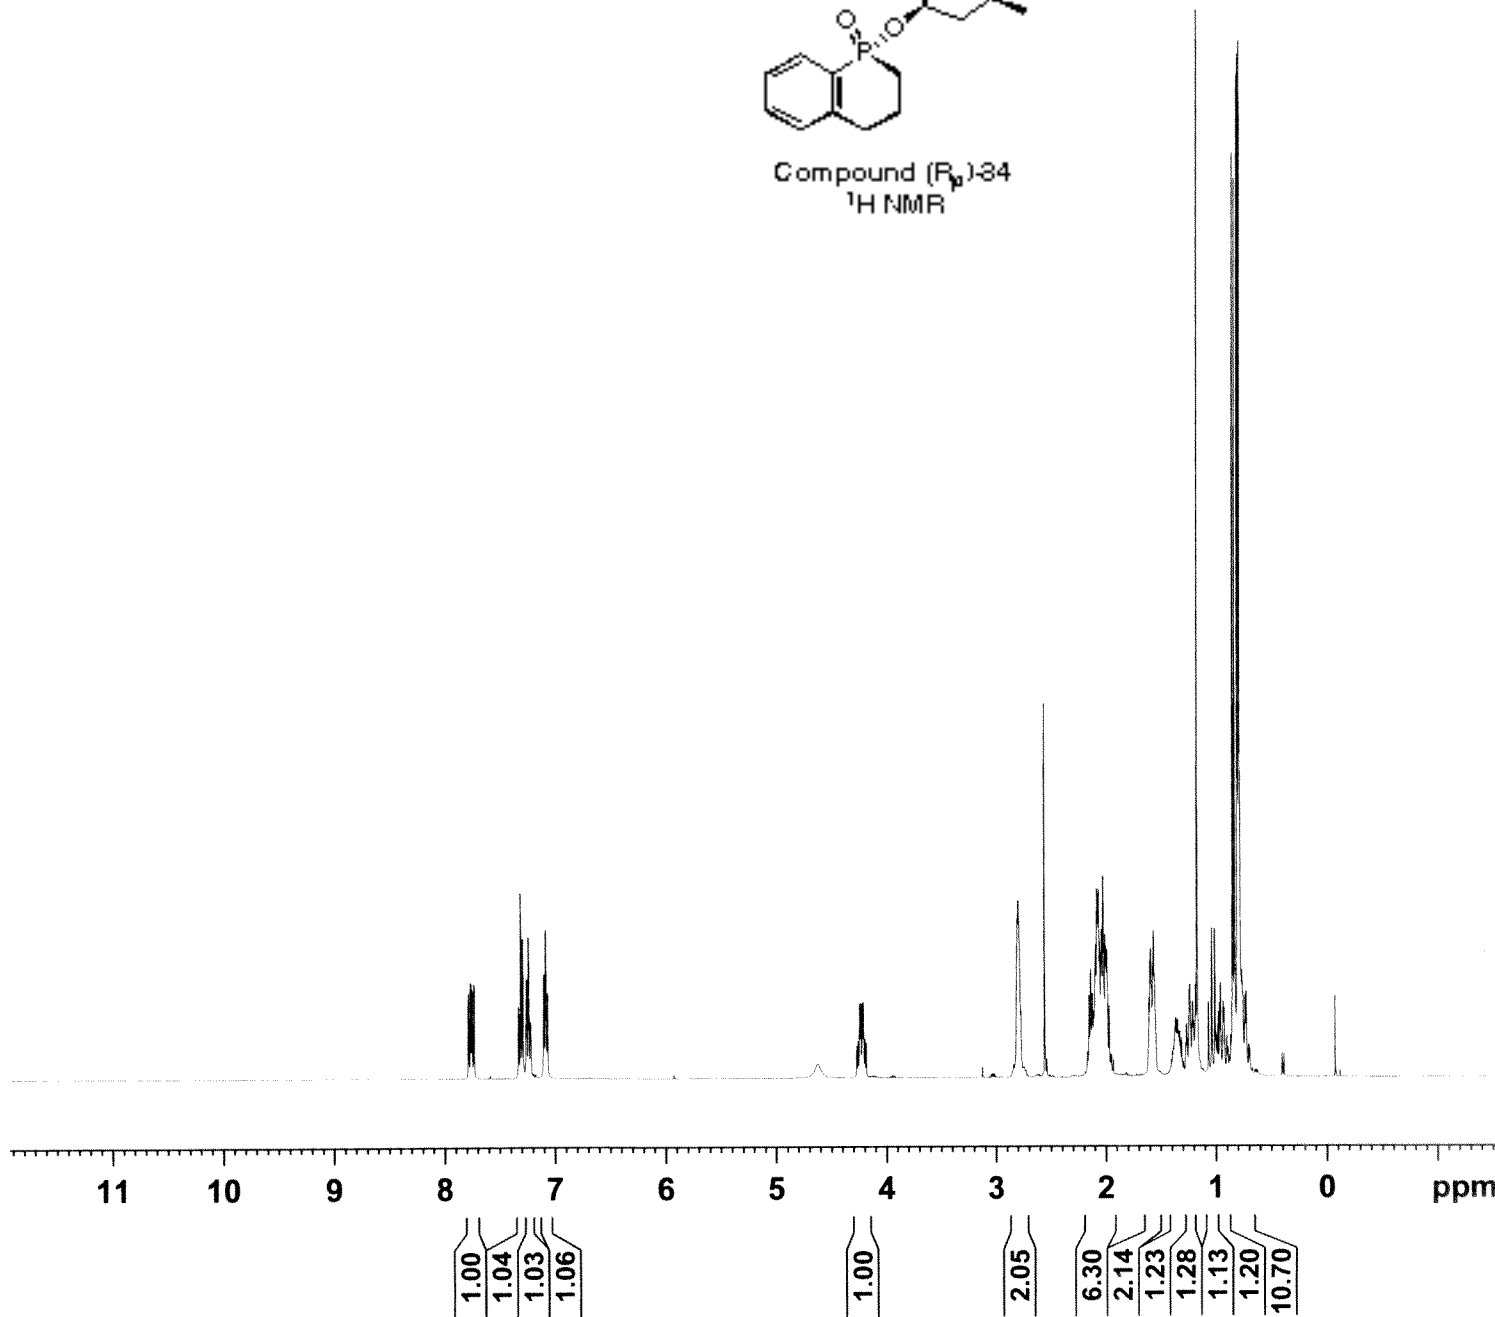

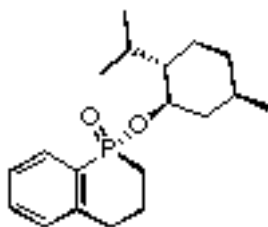

Compound (R<sub>p</sub>)-84  
<sup>13</sup>C NMR

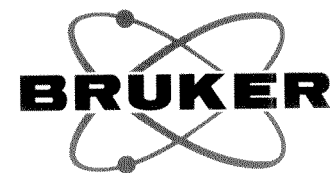

Current Data Parameters  
 NAME OB 2097 after column  
 EXPNO 4  
 PROCNO 1

F2 - Acquisition Parameters  
 Date\_ 20151201  
 Time\_ 12.00  
 INSTRUM spect  
 PROBHD 5 mm PABBO BB/  
 PULPROG zgpg30  
 TD 65536  
 SOLVENT CDC13  
 NS 410  
 DS 4  
 SWH 24038.461 Hz  
 FIDRES 0.366798 Hz  
 AQ 1.3631488 sec  
 RG 203.57  
 DW 20.800 usec  
 DE 6.50 usec  
 TE 292.1 K  
 D1 2.00000000 sec  
 D11 0.03000000 sec  
 TD0 1

==== CHANNEL f1 =====  
 SFO1 100.6228293 MHz  
 NUC1 13C  
 P1 10.00 usec  
 PLW1 45.00000000 W

==== CHANNEL f2 =====  
 SFO2 400.1316005 MHz  
 NUC2 1H  
 CPDPRG[2] waltz16  
 PCPD2 90.00 usec  
 PLW2 10.00000000 W  
 PLW12 0.31604999 W  
 PLW13 0.25600001 W

F2 - Processing parameters  
 SI 32768  
 SF 100.6127685 MHz  
 WDW EM  
 SSB 0  
 LB 1.00 Hz  
 GB 0  
 PC 1.40

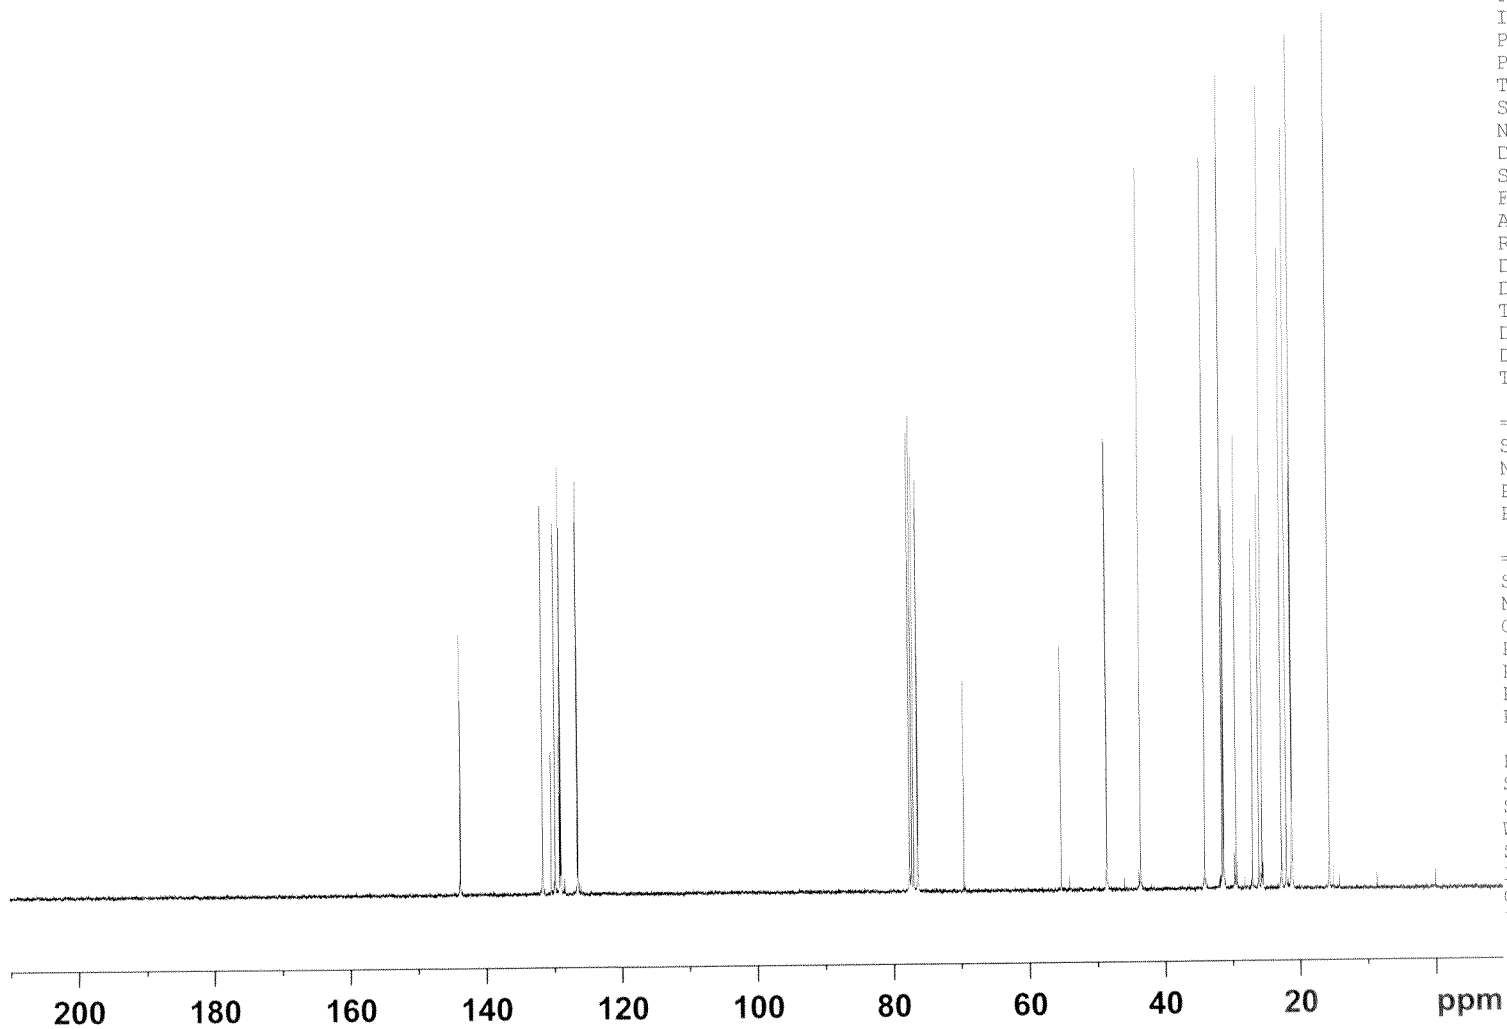



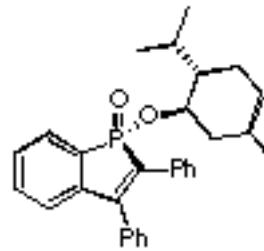

Compound (S<sub>p</sub>)-35  
<sup>31</sup>P/<sup>1</sup>H NMR decoupled

Current Data Parameters  
 NAME OB 1481 pure  
 EXPNO 1  
 PROCNO 1

F2 - Acquisition Parameters  
 Date\_ 20140514  
 Time 9.36  
 INSTRUM spect  
 PROBHD 5 mm PABBO BB/  
 PULPROG zgpg30  
 TD 65536  
 SOLVENT CDCl3  
 NS 16  
 DS 4  
 SWH 64102.563 Hz  
 FIDRES 0.978127 Hz  
 AQ 0.5111808 sec  
 RG 203.57  
 DW 7.800 usec  
 DE 6.50 usec  
 TE 297.1 K  
 D1 2.00000000 sec  
 D11 0.03000000 sec  
 TD0 1

==== CHANNEL f1 =====  
 SFO1 161.9674942 MHz  
 NUC1 31P  
 P1 14.25 usec  
 PLW1 15.00000000 W

==== CHANNEL f2 =====  
 SFO2 400.1316005 MHz  
 NUC2 1H  
 CPDPRG[2] waltz16  
 PCPD2 90.00 usec  
 PLW2 10.00000000 W  
 PLW12 0.31604999 W  
 PLW13 0.25600001 W

F2 - Processing parameters  
 SI 32768  
 SF 161.9755930 MHz  
 WDW EM  
 SSB 0  
 LB 1.00 Hz  
 GB 0  
 PC 1.40

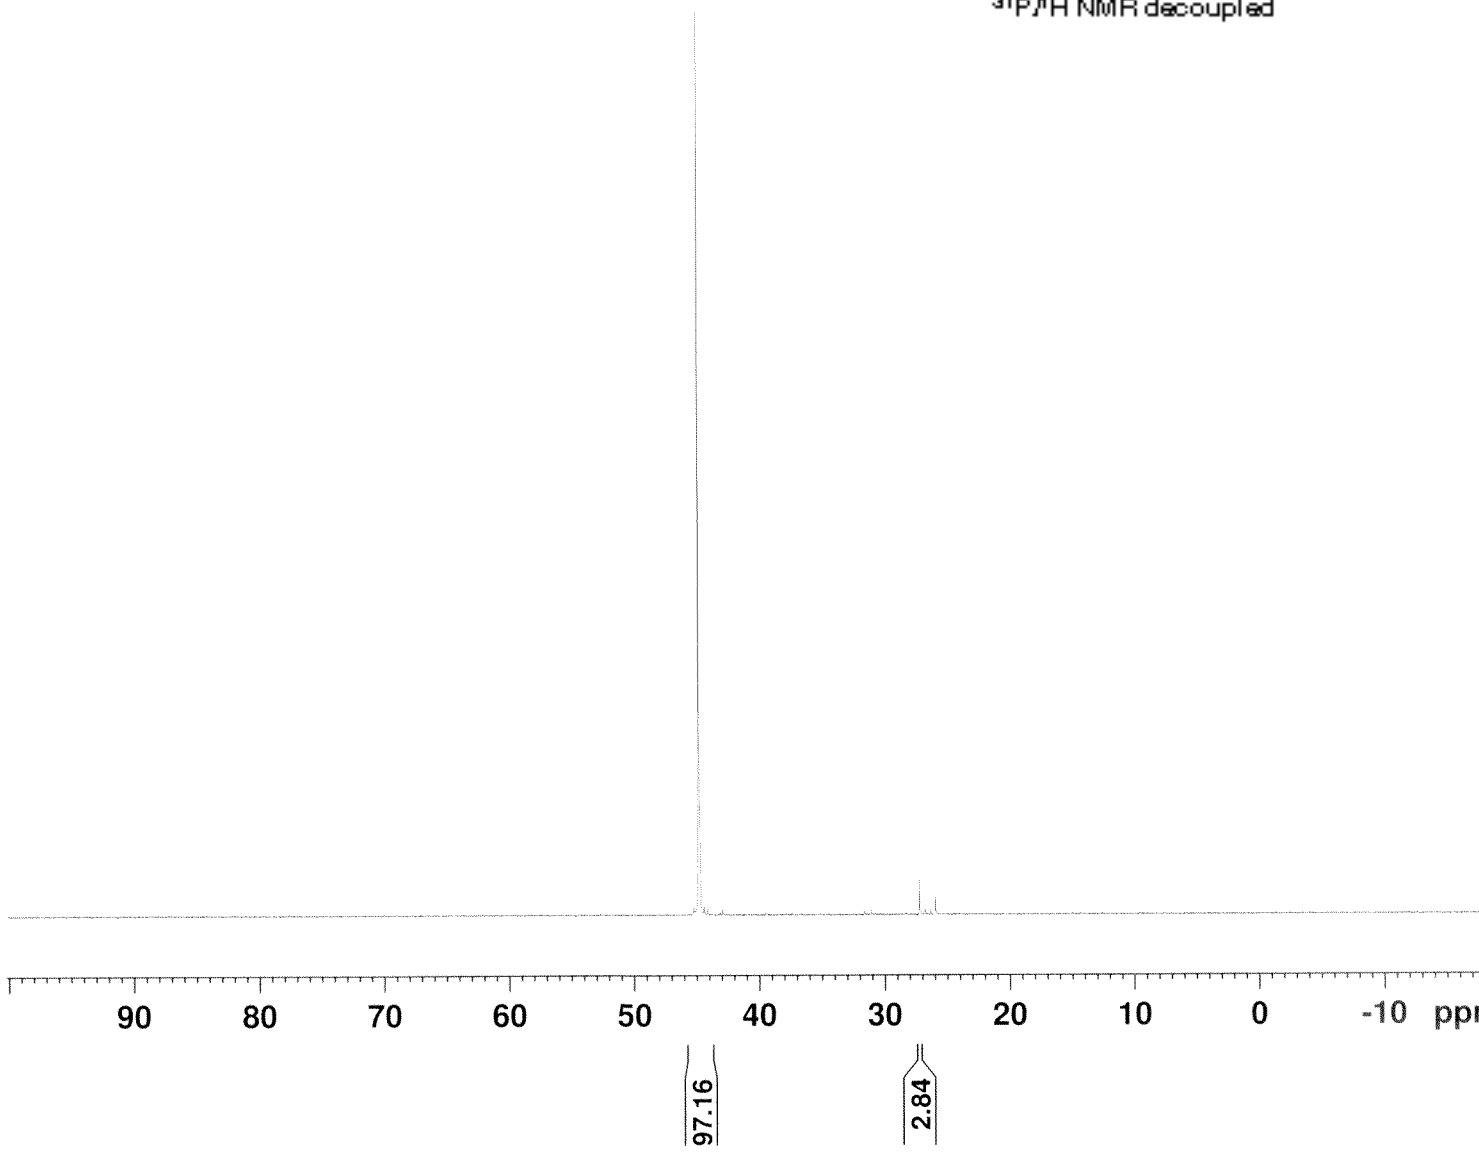

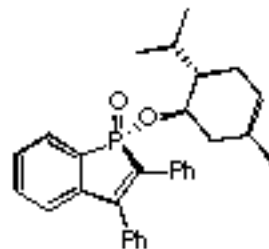

Compound (S<sub>p</sub>)-35  
<sup>31</sup>P/<sup>1</sup>H NMR coupled

Current Data Parameters  
 NAME OB 1481 pure  
 EXPNO 2  
 PROCNO 1

F2 - Acquisition Parameters  
 Date\_ 20140514  
 Time 9.38  
 INSTRUM spect  
 PROBHD 5 mm PABBO BB/  
 PULPROG zg30  
 TD 65536  
 SOLVENT CDCl3  
 NS 26  
 DS 4  
 SWH 64102.563 Hz  
 FIDRES 0.978127 Hz  
 AQ 0.5111808 sec  
 RG 203.57  
 DW 7.800 usec  
 DE 6.50 usec  
 TE 296.4 K  
 D1 2.00000000 sec  
 TD0 1

==== CHANNEL f1 =====  
 SFO1 161.9674942 MHz  
 NUC1 31P  
 P1 14.25 usec  
 PLW1 15.00000000 W

F2 - Processing parameters  
 SI 32768  
 SF 161.9755930 MHz  
 WDW EM  
 SSB 0  
 LB 1.00 Hz  
 GB 0  
 PC 1.40

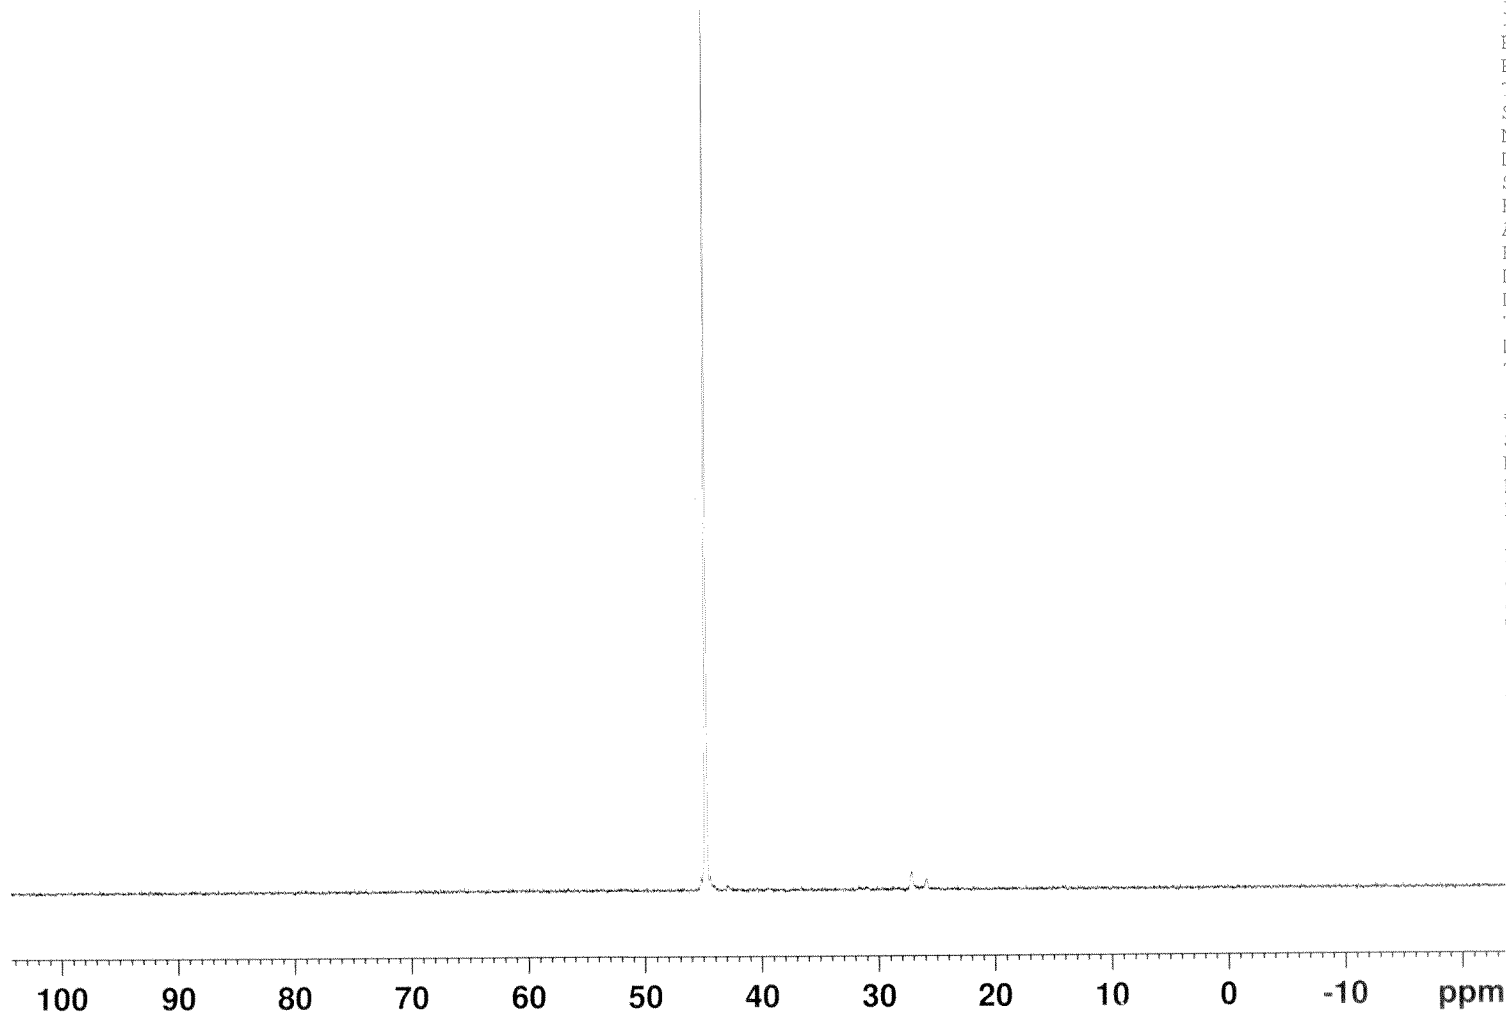

7.740  
7.727  
7.721  
7.715  
7.401  
7.395  
7.387  
7.288  
7.268  
7.196  
7.188  
7.184  
7.120  
7.114  
2.317  
2.289  
2.172  
2.167  
1.687  
1.672  
1.641  
1.601  
1.554  
1.271  
1.249  
1.221  
1.192  
0.947  
0.922  
0.910  
0.817  
0.788  
0.673  
0.670  
0.656  
0.439  
0.435  
0.422

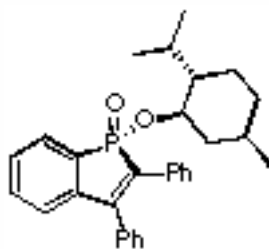

Compound (Sp)-35  
<sup>1</sup>H NMR

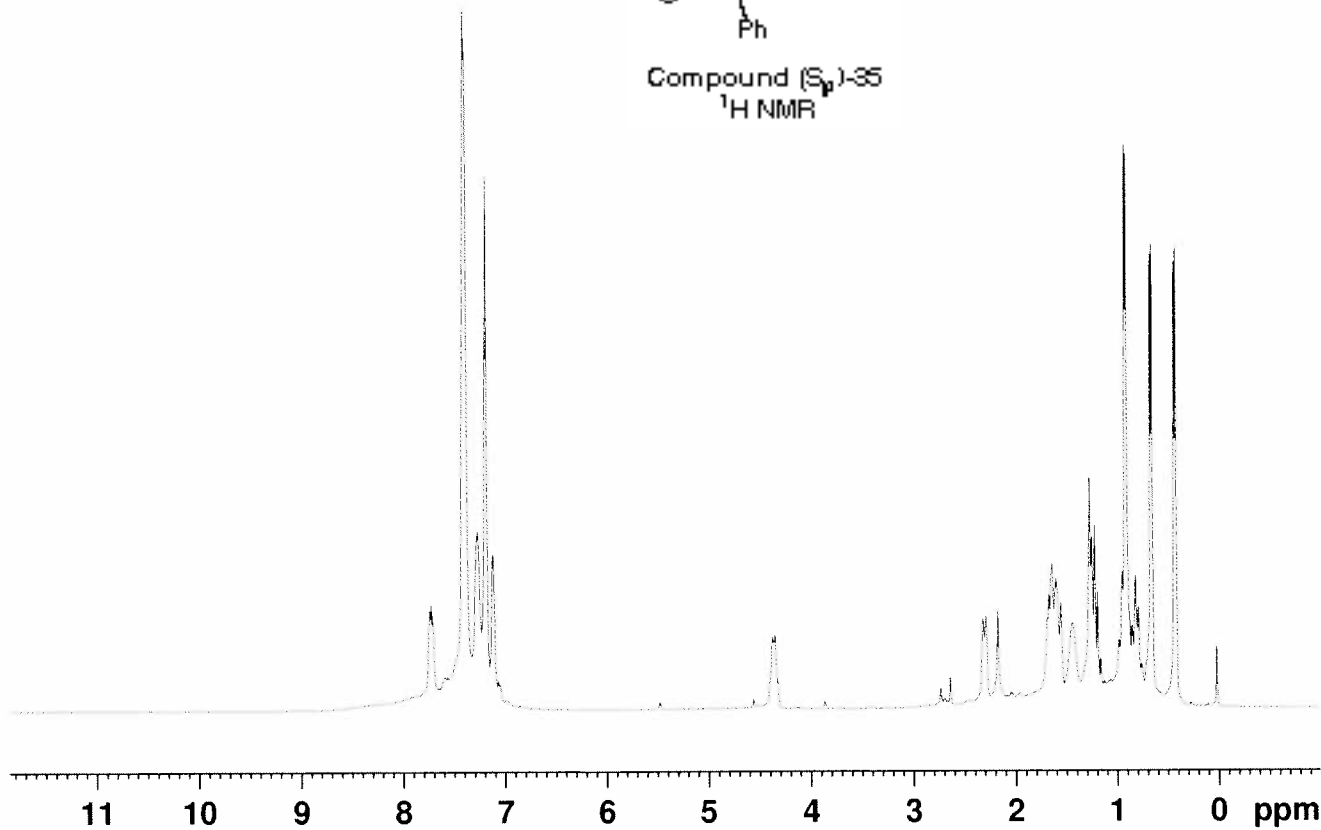

1.50  
8.35  
5.44  
1.41  
0.98  
1.16  
0.77  
3.95  
1.55  
3.92  
7.10  
3.29  
3.00

Current Data Parameters  
NAME OB 1481 pure  
EXPNO 3  
PROCNO 1

F2 - Acquisition Parameters  
Date\_ 20140514  
Time 9.42  
INSTRUM spect  
PROBHD 5 mm PABBO BB/  
PULPROG zg30  
TD 65536  
SOLVENT CDCl3  
NS 16  
DS 2  
SWH 8012.820 Hz  
FIDRES 0.122266 Hz  
AQ 4.0894465 sec  
RG 18.98  
DW 62.400 usec  
DE 6.50 usec  
TE 296.0 K  
D1 1.0000000 sec  
TD0 1

==== CHANNEL f1 =====  
SF01 400.1324710 MHz  
NUC1 1H  
P1 10.00 usec  
PLW1 25.00300026 W

F2 - Processing parameters  
SI 65536  
SF 400.1300000 MHz  
WDW EM  
SSB 0  
LB 0.30 Hz  
GB 0  
PC 1.00

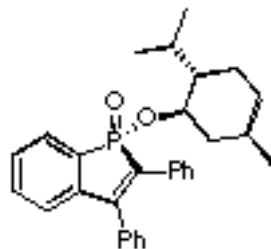

Compound (S<sub>P</sub>)-35  
<sup>13</sup>C NMR

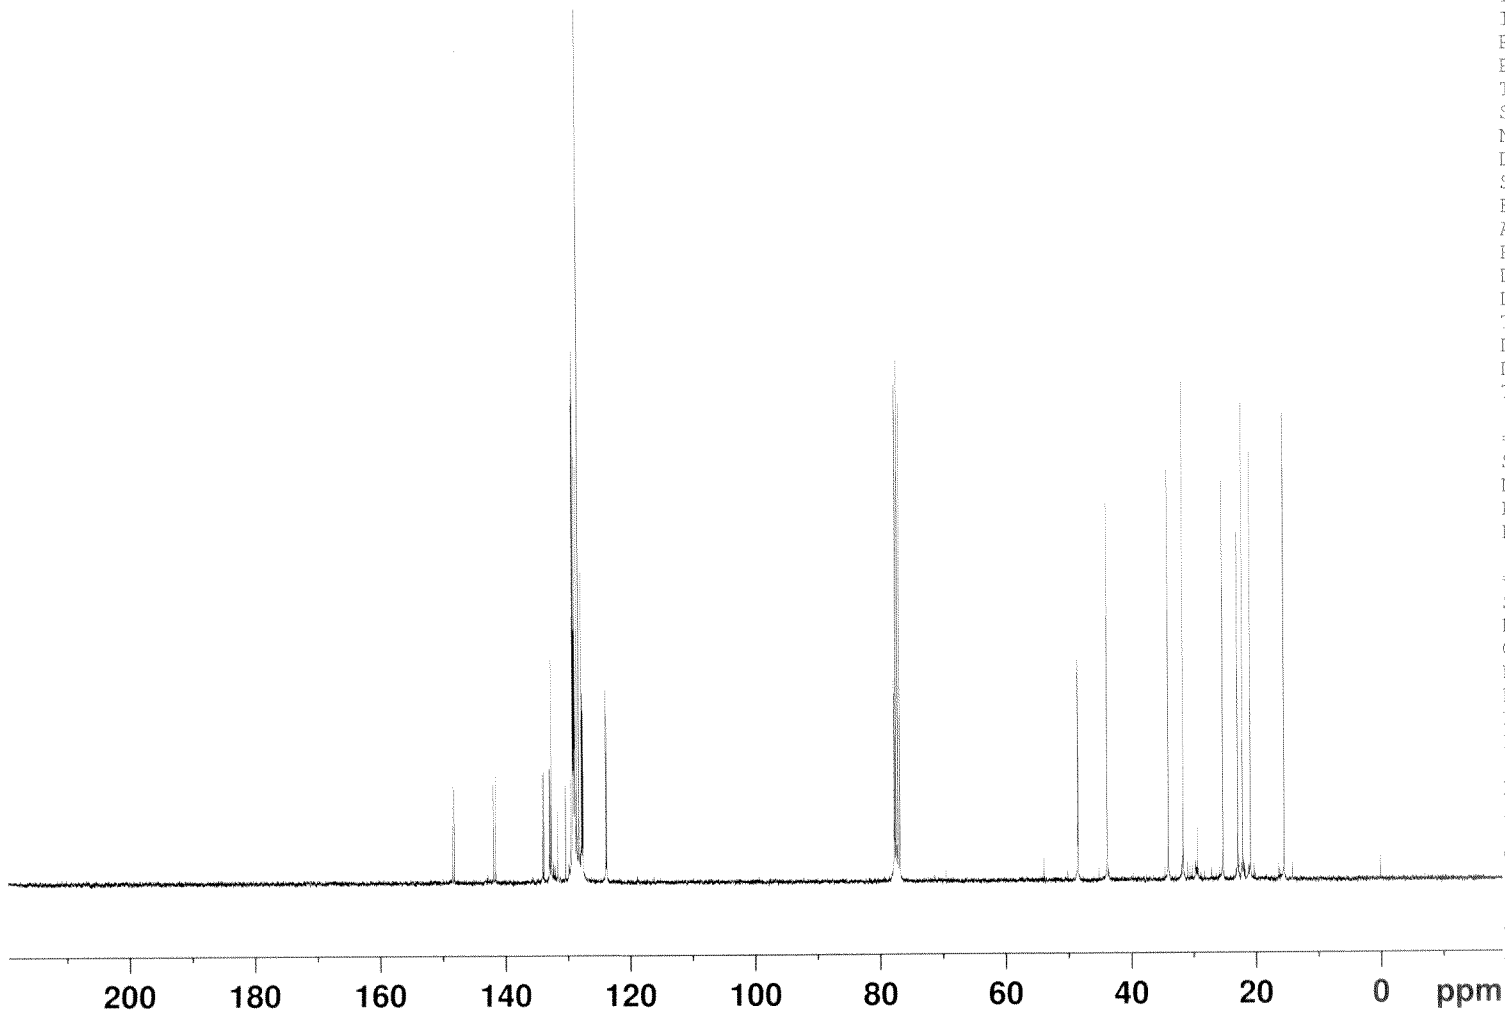

Current Data Parameters  
 NAME OB 1481 pure  
 EXPNO 4  
 PROCNO 1

F2 - Acquisition Parameters  
 Date\_ 20140514  
 Time 18.24  
 INSTRUM spect  
 PROBHD 5 mm PABBO BB/  
 PULPROG zgpg30  
 TD 65536  
 SOLVENT CDCl3  
 NS 817  
 DS 4  
 SWH 24038.461 Hz  
 FIDRES 0.366798 Hz  
 AQ 1.3631488 sec  
 RG 203.57  
 DW 20.800 usec  
 DE 6.50 usec  
 TE 296.7 K  
 D1 2.00000000 sec  
 D11 0.03000000 sec  
 TD0 1

==== CHANNEL f1 =====  
 SFO1 100.6228293 MHz  
 NUC1 13C  
 P1 10.00 usec  
 PLW1 45.00000000 W

==== CHANNEL f2 =====  
 SFO2 400.1316005 MHz  
 NUC2 1H  
 CPDPRG[2] waltz16  
 PCPD2 90.00 usec  
 PLW2 10.00000000 W  
 PLW12 0.31604999 W  
 PLW13 0.25600001 W

F2 - Processing parameters  
 SI 32768  
 SF 100.6127690 MHz  
 WDW EM  
 SSB 0  
 LB 1.00 Hz  
 GB 0  
 PC 1.40

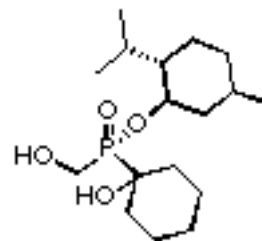

Compound (S<sub>p</sub>)-37  
<sup>31</sup>P/<sup>1</sup>H NMR decoupled

Current Data Parameters  
 NAME OB 2105 1st crystallization  
 EXPNO 1  
 PROCNO 1

F2 - Acquisition Parameters  
 Date\_ 20150716  
 Time 15.36  
 INSTRUM spect  
 PROBHD 5 mm PABBO BB/  
 PULPROG zgpg30  
 TD 65536  
 SOLVENT CDCl3  
 NS 16  
 DS 4  
 SWH 64102.563 Hz  
 FIDRES 0.978127 Hz  
 AQ 0.5111808 sec  
 RG 203.57  
 DW 7.800 usec  
 DE 6.50 usec  
 TE 295.6 K  
 D1 2.00000000 sec  
 D11 0.03000000 sec  
 TDO 1

==== CHANNEL f1 =====  
 SFO1 161.9674942 MHz  
 NUC1 31P  
 P1 14.25 usec  
 PLW1 15.00000000 W

==== CHANNEL f2 =====  
 SFO2 400.1316005 MHz  
 NUC2 1H  
 CPDPRG[2] waltz16  
 PCPD2 90.00 usec  
 PLW2 10.00000000 W  
 PLW12 0.31604999 W  
 PLW13 0.25600001 W

F2 - Processing parameters  
 SI 32768  
 SF 161.9755930 MHz  
 WDW EM  
 SSB 0  
 LB 1.00 Hz  
 GB 0  
 PC 1.40

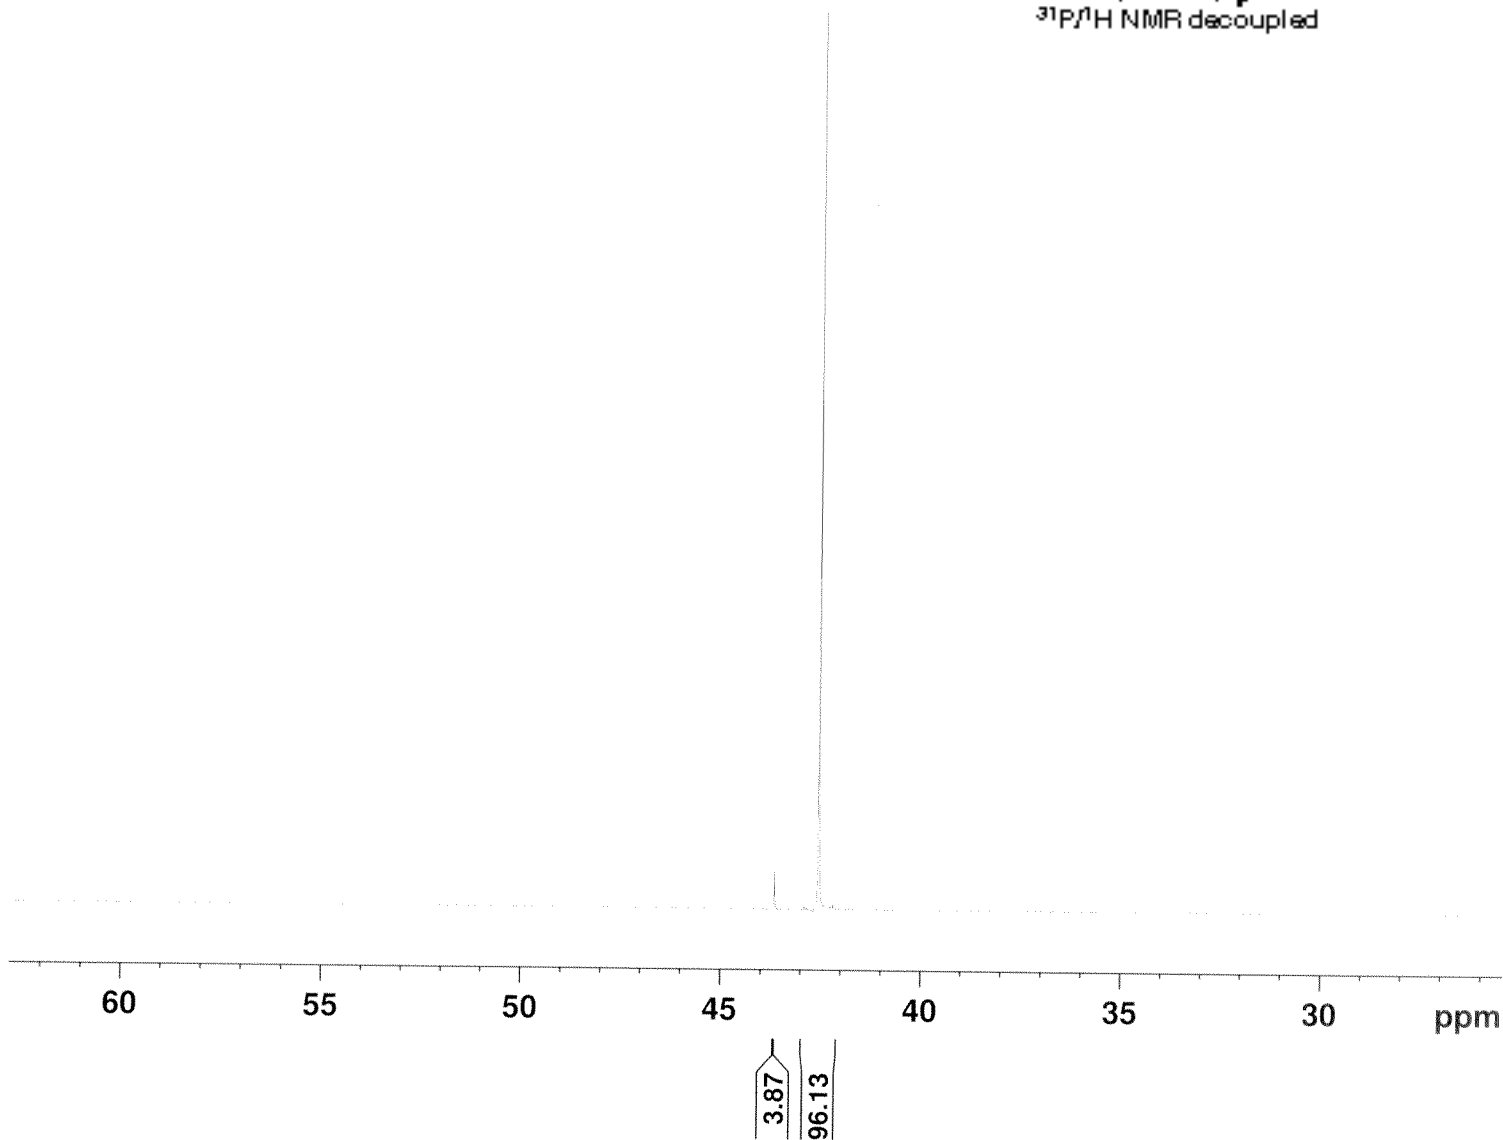

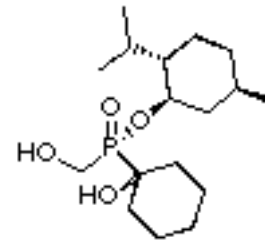

Compound (S<sub>p</sub>)-37  
<sup>31</sup>P/<sup>1</sup>H NMR coupled

Current Data Parameters  
 NAME OB 2105 1st crystallization  
 EXPNO 2  
 PROCNO 1

F2 - Acquisition Parameters  
 Date\_ 20150716  
 Time 15.38  
 INSTRUM spect  
 PROBHD 5 mm PABBO BB/  
 PULPROG zg30  
 TD 65536  
 SOLVENT CDCl3  
 NS 32  
 DS 4  
 SWH 64102.563 Hz  
 FIDRES 0.978127 Hz  
 AQ 0.5111808 sec  
 RG 203.57  
 DW 7.800 usec  
 DE 6.50 usec  
 TE 295.2 K  
 D1 2.00000000 sec  
 TD0 1

===== CHANNEL f1 =====  
 SFO1 161.9674942 MHz  
 NUC1 <sup>31</sup>P  
 P1 14.25 usec  
 PLW1 15.00000000 W

F2 - Processing parameters  
 SI 32768  
 SF 161.9755930 MHz  
 WDW EM  
 SSB 0  
 LB 1.00 Hz  
 GB 0  
 PC 1.40

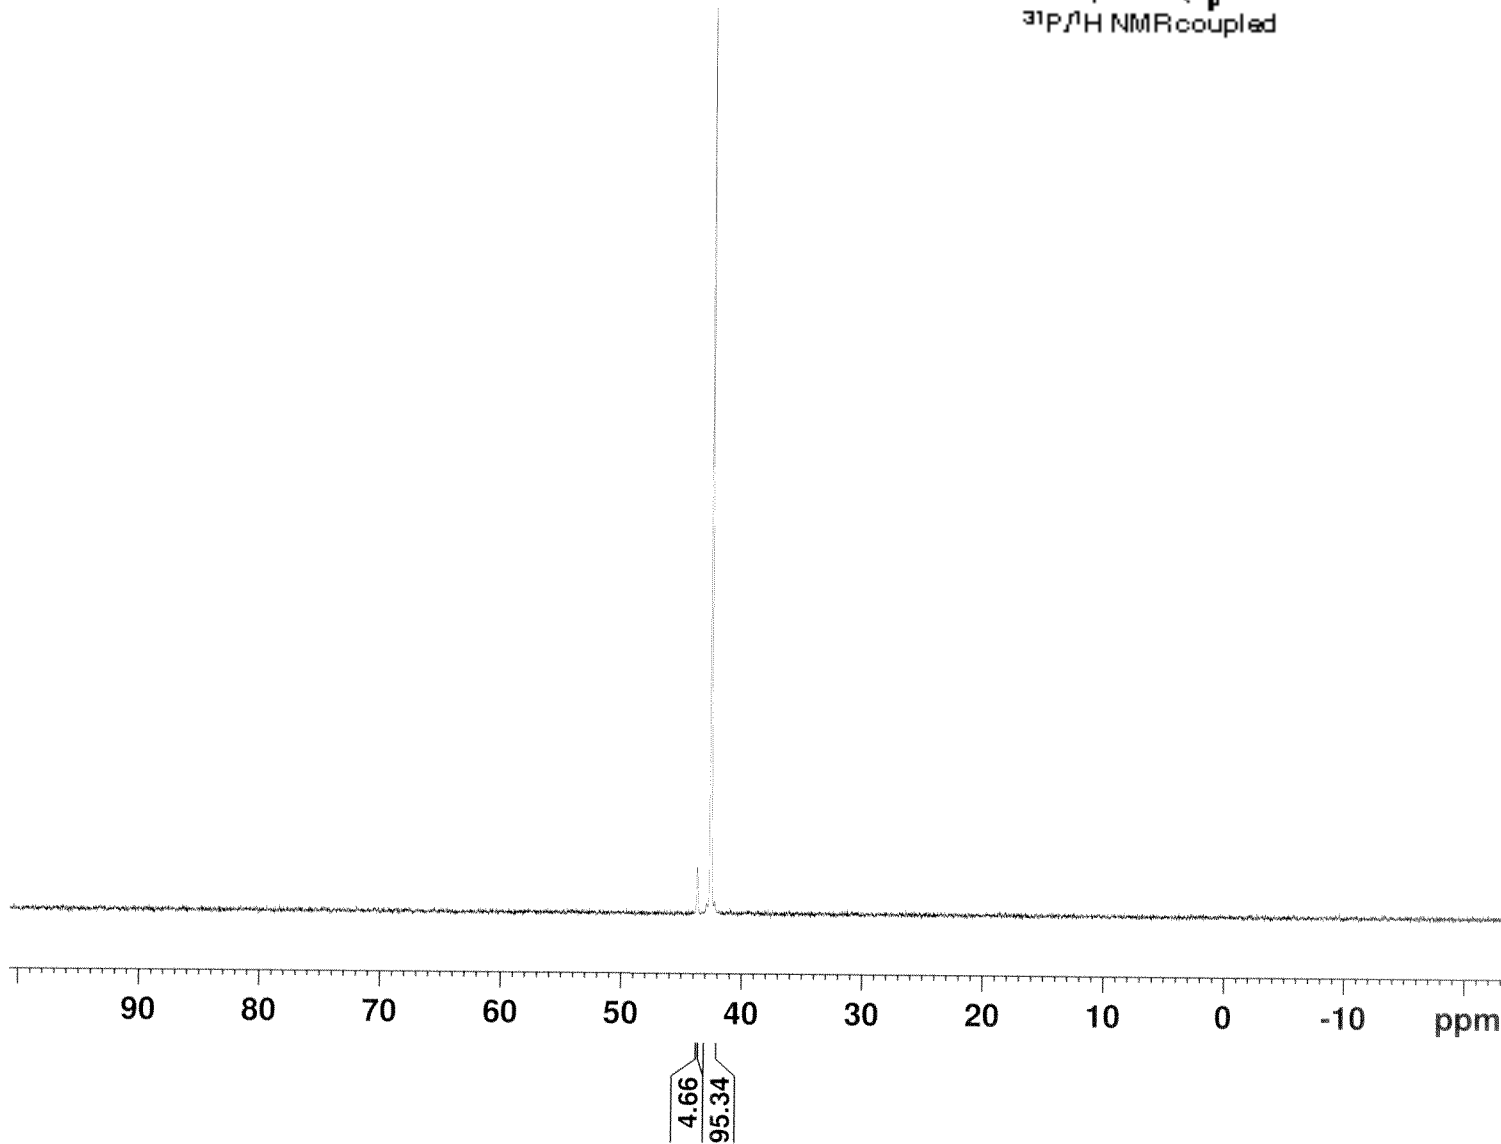

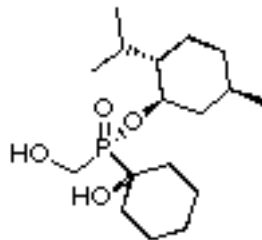

Compound (S<sub>p</sub>)-37  
<sup>1</sup>H NMR

Current Data Parameters  
 NAME OB 2105 1st crystallization  
 EXPNO 3  
 PROCNO 1

F2 - Acquisition Parameters  
 Date\_ 20150716  
 Time 15.40  
 INSTRUM spect  
 PROBHD 5 mm PABBO BB/  
 PULPROG zg30  
 TD 65536  
 SOLVENT CDCl3  
 NS 9  
 DS 2  
 SWH 8012.820 Hz  
 FIDRES 0.122266 Hz  
 AQ 4.0894465 sec  
 RG 32.38  
 DW 62.400 usec  
 DE 6.50 usec  
 TE 295.2 K  
 D1 1.0000000 sec  
 TD0 1

==== CHANNEL f1 =====  
 SFO1 400.1324710 MHz  
 NUC1 1H  
 P1 10.00 usec  
 PLW1 25.00300026 W

F2 - Processing parameters  
 SI 65536  
 SF 400.1300000 MHz  
 WDW EM  
 SSB 0  
 LB 0.30 Hz  
 GB 0  
 PC 1.00

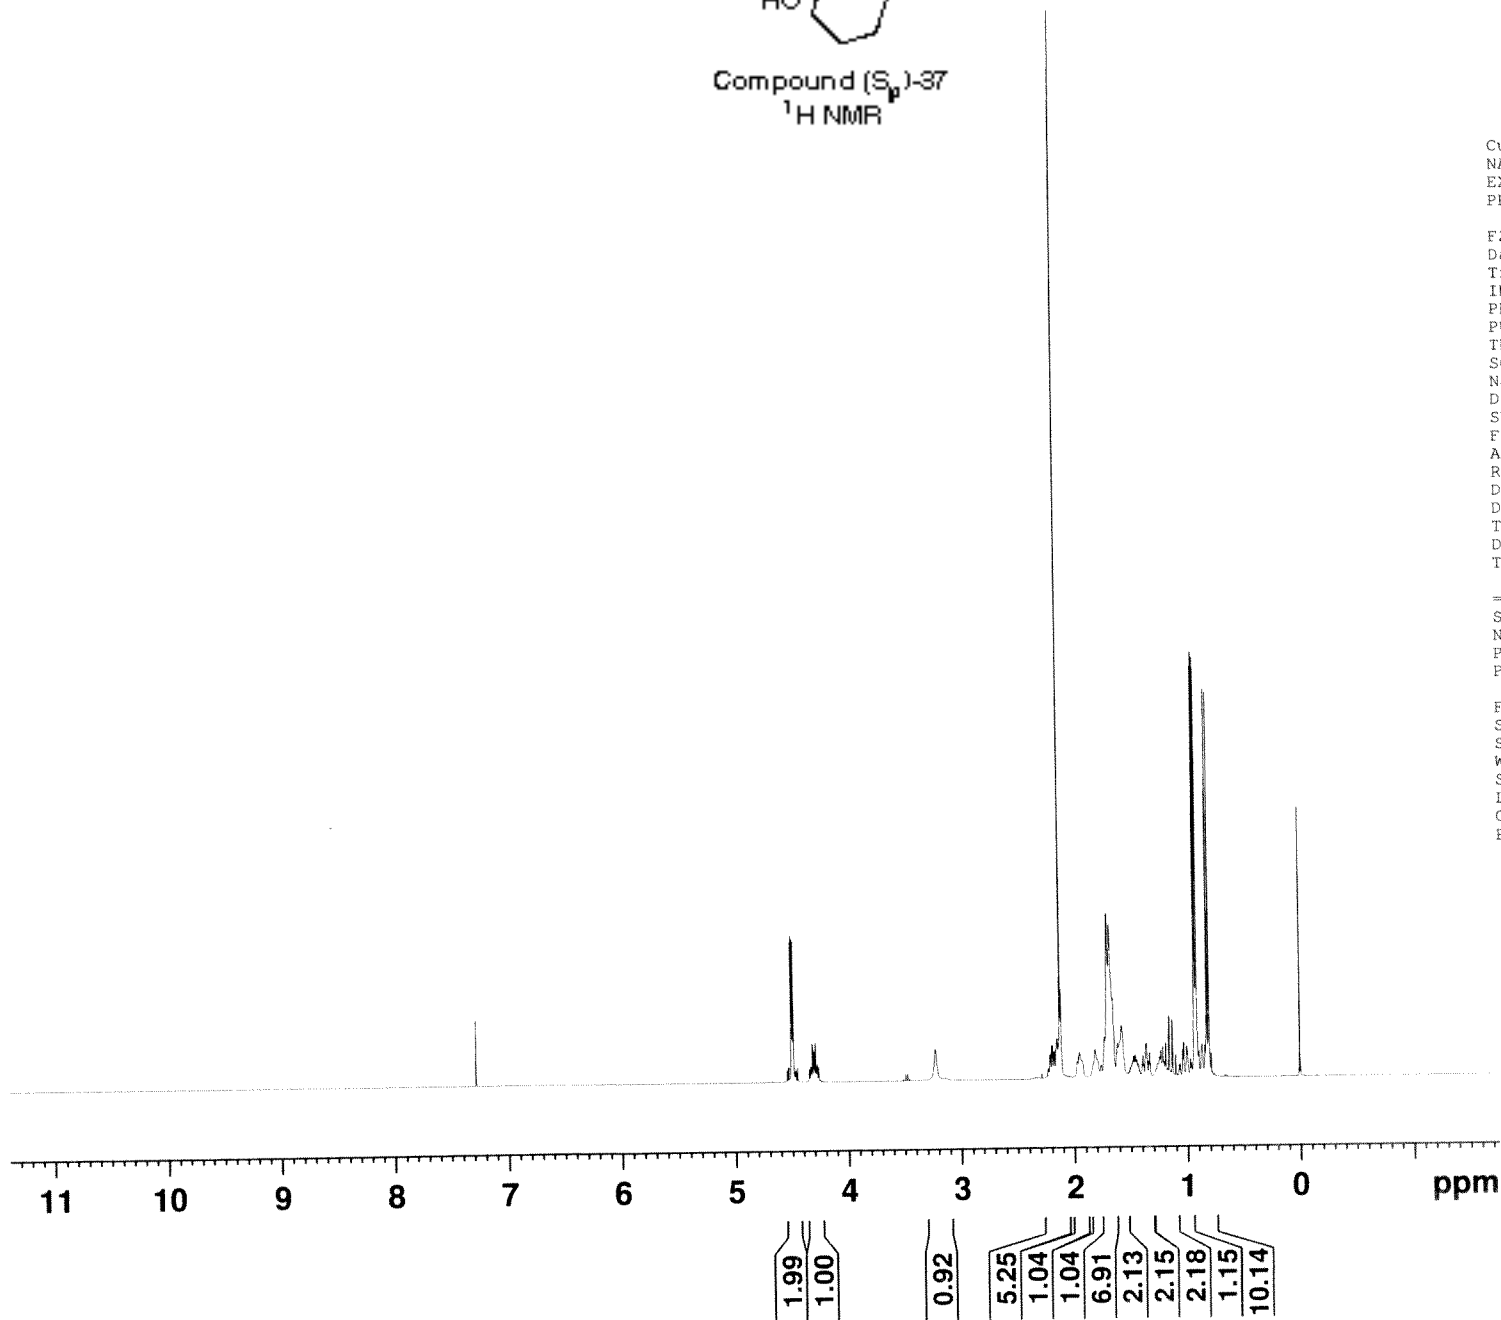

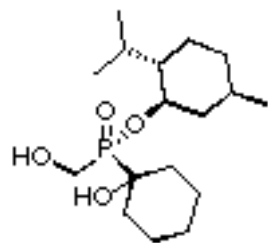

Compound (S<sub>p</sub>)-37  
<sup>13</sup>C NMR

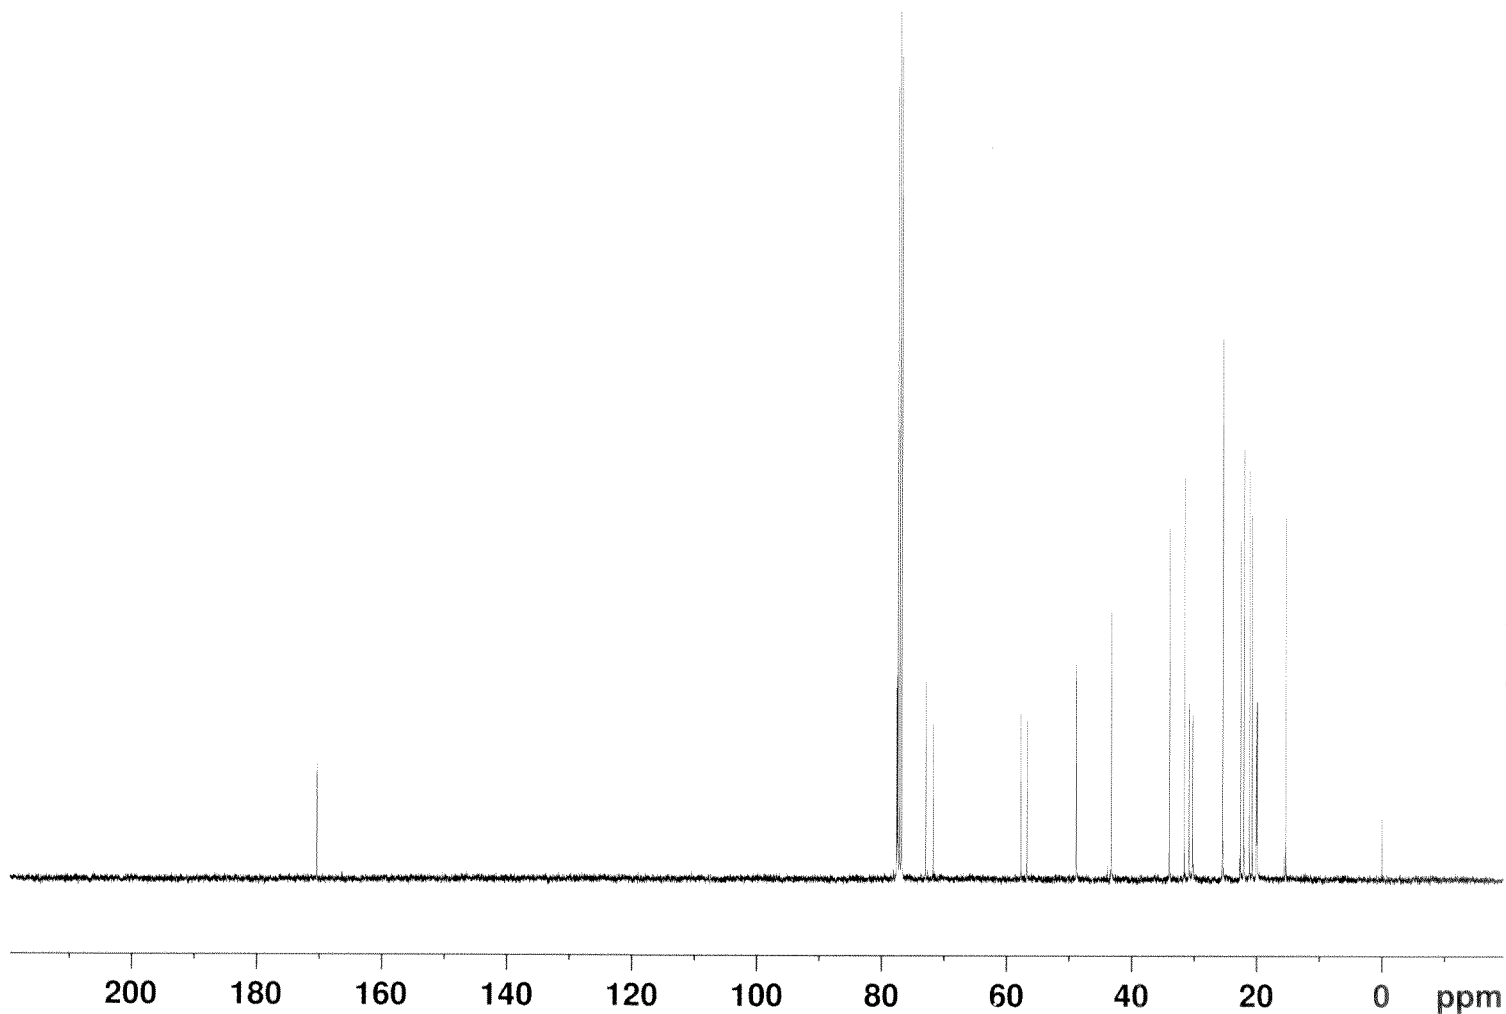

Current Data Parameters  
 NAME OB 2105 1st crystallization  
 EXPNO 4  
 PROCNO 1

F2 - Acquisition Parameters  
 Date\_ 20150716  
 Time 17.20  
 INSTRUM spect  
 PROBHD 5 mm PABBO BB/  
 PULPROG zgpg30  
 TD 65536  
 SOLVENT CDCl3  
 NS 608  
 DS 4  
 SWH 24038.461 Hz  
 FIDRES 0.366798 Hz  
 AQ 1.3631488 sec  
 RG 203.57  
 DW 20.800 usec  
 DE 6.50 usec  
 TE 295.8 K  
 D1 2.0000000 sec  
 D11 0.0300000 sec  
 TD0 1

===== CHANNEL f1 =====  
 SFO1 100.6228293 MHz  
 NUC1 13C  
 P1 10.00 usec  
 PLW1 45.00000000 W

===== CHANNEL f2 =====  
 SFO2 400.1316005 MHz  
 NUC2 1H  
 CPDPRG[2] waltz16  
 PCPD2 90.00 usec  
 PLW2 10.00000000 W  
 PLW12 0.31604999 W  
 PLW13 0.25600001 W

F2 - Processing parameters  
 SI 32768  
 SF 100.6127685 MHz  
 WDW EM  
 SSB 0  
 LB 1.00 Hz  
 GB 0  
 PC 1.40



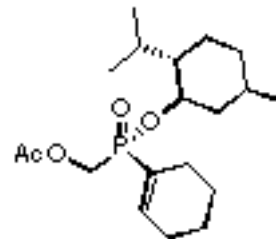

Compound (R<sub>p</sub>)-38  
<sup>31</sup>P/<sup>1</sup>H NMR decoupled

Current Data Parameters  
 NAME OB 2096 after column  
 EXPNO 1  
 PROCNO 1

F2 - Acquisition Parameters  
 Date\_ 20150701  
 Time 10.05  
 INSTRUM spect  
 PROBHD 5 mm PABBO BB/  
 PULPROG zgpg30  
 TD 65536  
 SOLVENT CDCl3  
 NS 16  
 DS 4  
 SWH 64102.563 Hz  
 FIDRES 0.978127 Hz  
 AQ 0.5111808 sec  
 RG 203.57  
 DW 7.800 usec  
 DE 6.50 usec  
 TE 294.8 K  
 D1 2.00000000 sec  
 D11 0.03000000 sec  
 TD0 1

==== CHANNEL f1 =====  
 SFO1 161.9674942 MHz  
 NUC1 31P  
 P1 14.25 usec  
 PLW1 15.00000000 W

==== CHANNEL f2 =====  
 SFO2 400.1316005 MHz  
 NUC2 1H  
 CPDPRG[2] waltz16  
 PCPD2 90.00 usec  
 PLW2 10.00000000 W  
 PLW12 0.31604999 W  
 PLW13 0.25600001 W

F2 - Processing parameters  
 SI 32768  
 SF 161.9755930 MHz  
 WDW EM  
 SSB 0  
 LB 1.00 Hz  
 GB 0  
 PC 1.40

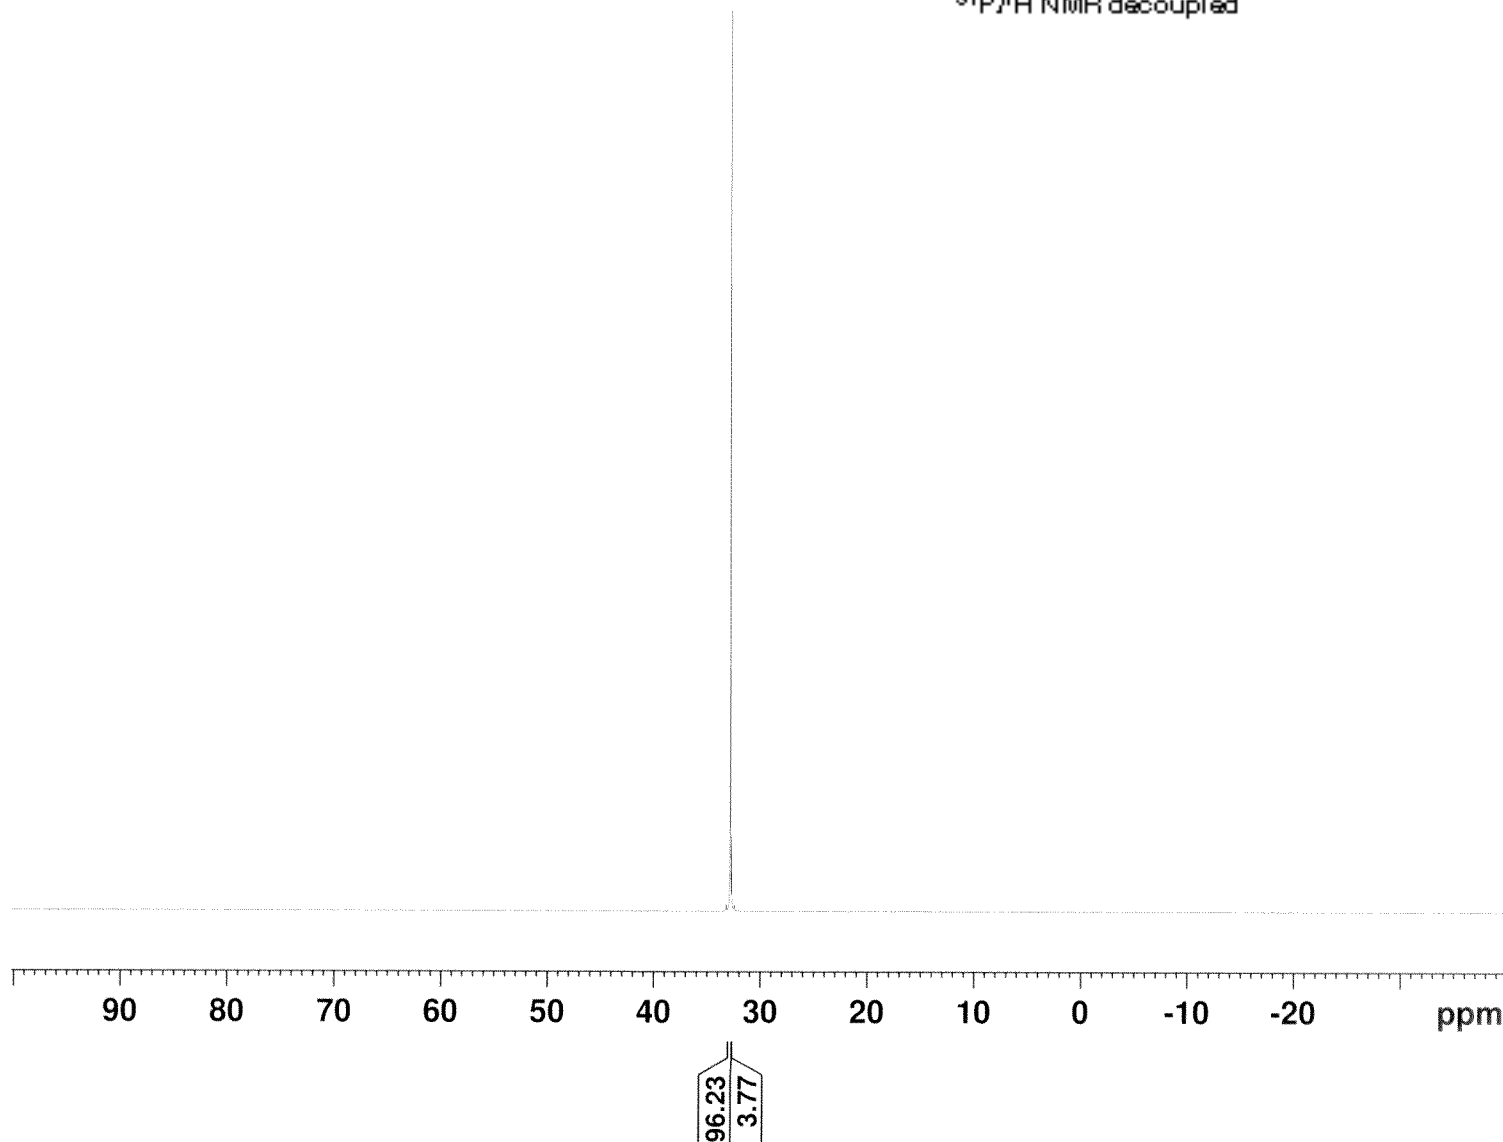

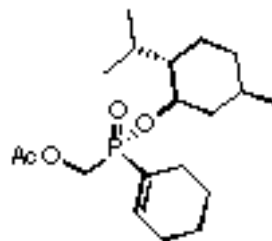

Compound (R<sub>p</sub>)-38  
<sup>31</sup>P/<sup>1</sup>H NMR coupled

Current Data Parameters  
NAME OB 2096 after column  
EXPNO 2  
PROCNO 1

F2 - Acquisition Parameters  
Date\_ 20150701  
Time 10.07  
INSTRUM spect  
PROBHD 5 mm PABBO BB/  
PULPROG zg30  
TD 65536  
SOLVENT CDC13  
NS 32  
DS 4  
SWH 64102.563 Hz  
FIDRES 0.978127 Hz  
AQ 0.5111808 sec  
RG 203.57  
DW 7.800 usec  
DE 6.50 usec  
TE 294.4 K  
D1 2.00000000 sec  
TD0 1

==== CHANNEL f1 =====  
SFO1 161.9674942 MHz  
NUC1 31P  
P1 14.25 usec  
PLW1 15.00000000 W

F2 - Processing parameters  
SI 32768  
SF 161.9755930 MHz  
WDW EM  
SSB 0  
LB 1.00 Hz  
GB 0  
PC 1.40

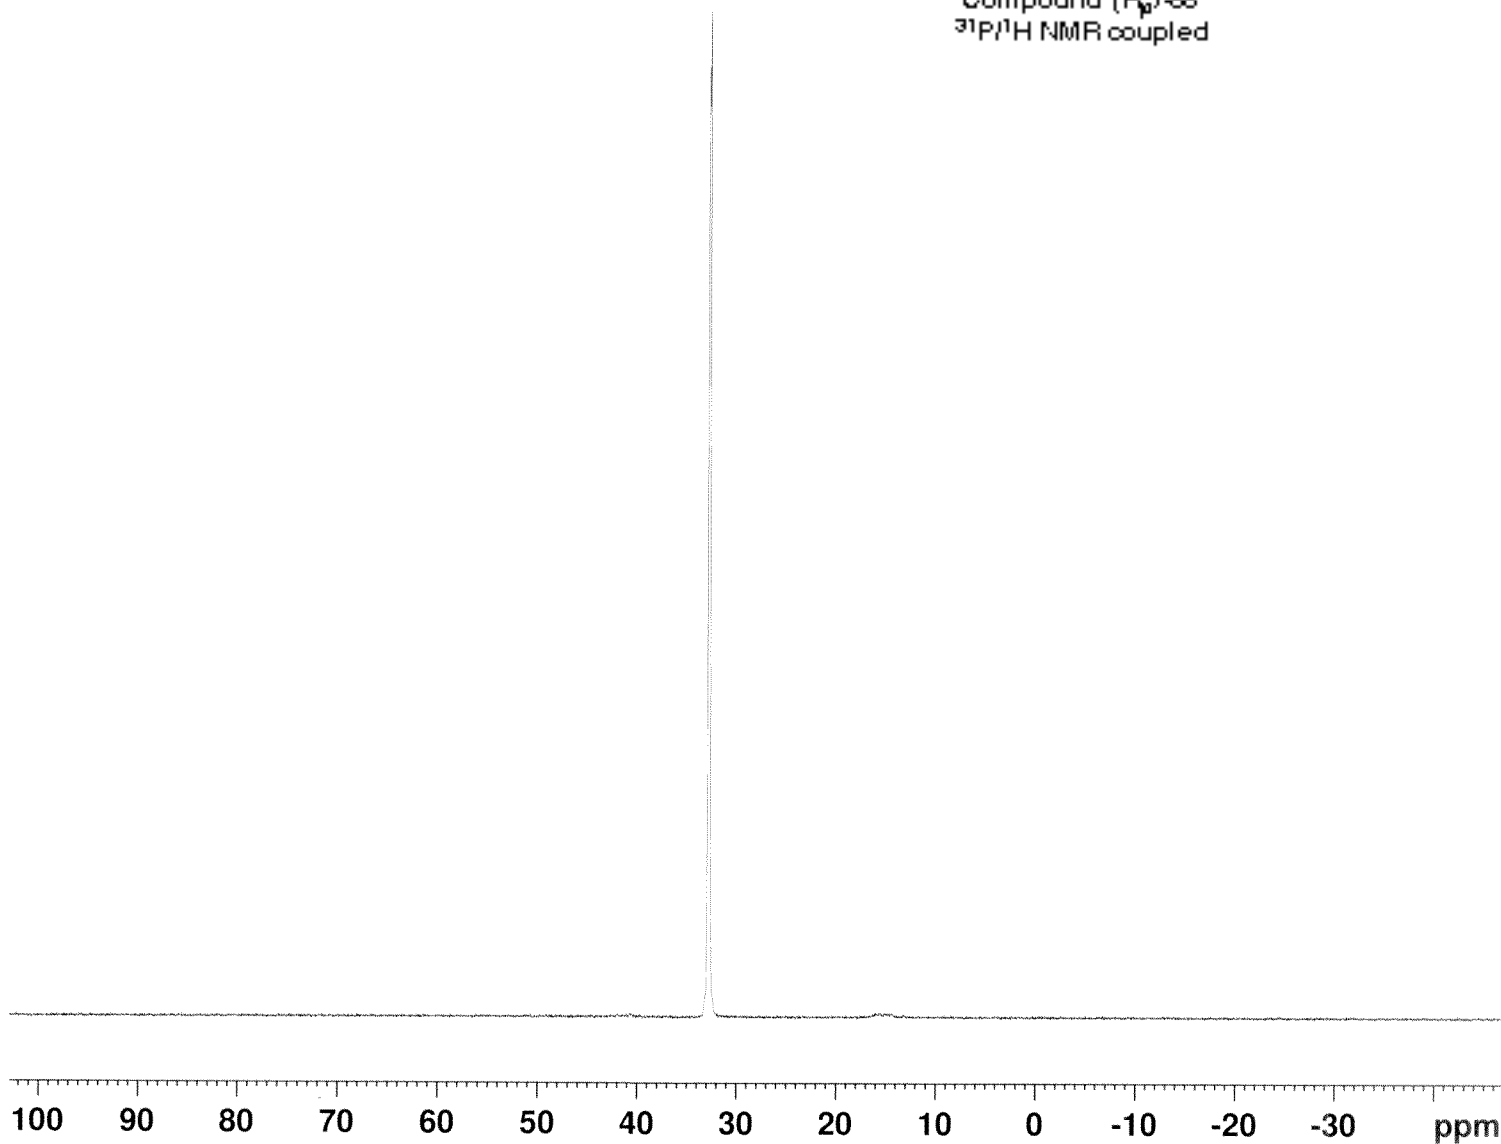

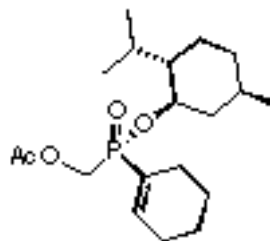

Compound (Rp)-38  
<sup>1</sup>H NMR

Current Data Parameters  
 NAME OB 2096 after column  
 EXPNO 3  
 PROCNO 1

F2 - Acquisition Parameters  
 Date\_ 20150701  
 Time 10.08  
 INSTRUM spect  
 PROBHD 5 mm PABBO BB/  
 PULPROG zg30  
 TD 65536  
 SOLVENT CDCl3  
 NS 8  
 DS 2  
 SWH 8012.820 Hz  
 FIDRES 0.122266 Hz  
 AQ 4.0894465 sec  
 RG 11.05  
 DW 62.400 usec  
 DE 6.50 usec  
 TE 294.3 K  
 D1 1.00000000 sec  
 TD0 1

==== CHANNEL f1 =====  
 SFO1 400.1324710 MHz  
 NUC1 1H  
 P1 10.00 usec  
 PLW1 25.00300026 W

F2 - Processing parameters  
 SI 65536  
 SF 400.1300000 MHz  
 WDW EM  
 SSB 0  
 LB 0.30 Hz  
 GB 0  
 PC 1.00

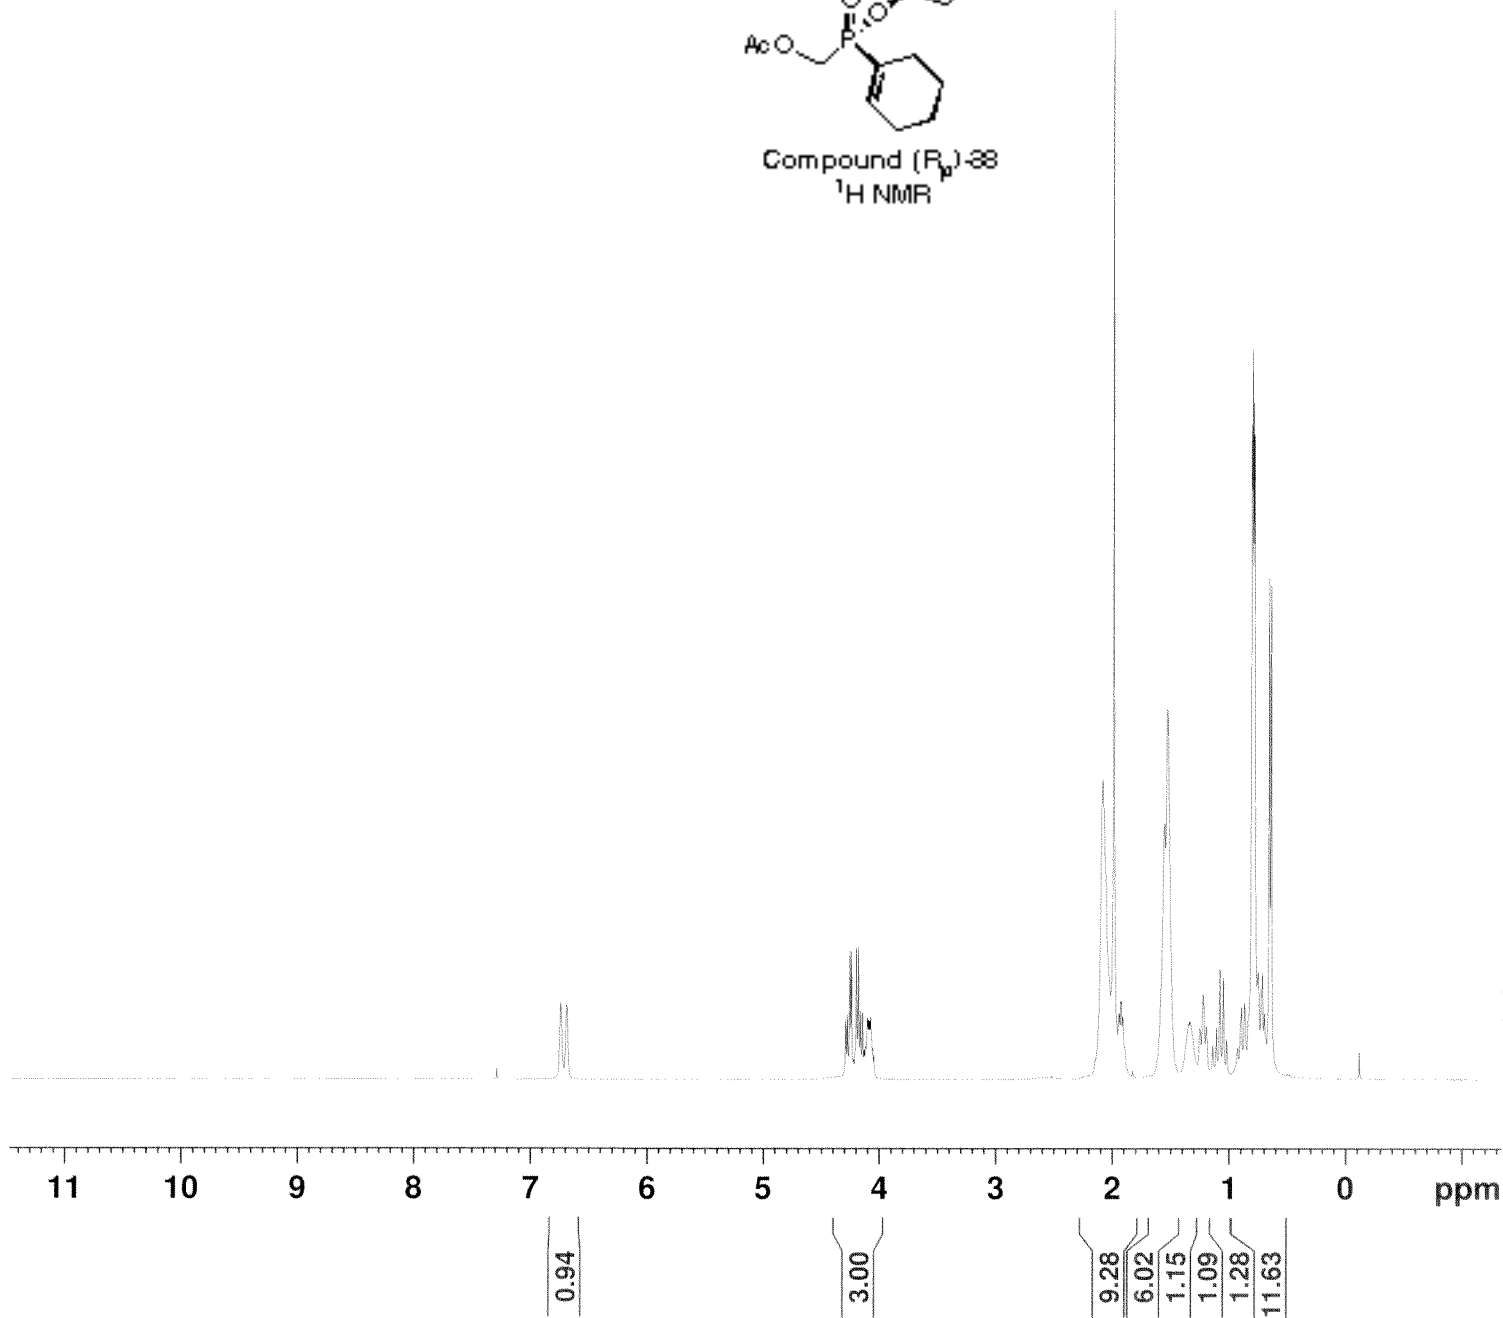

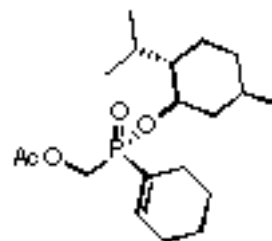

Compound (R<sub>p</sub>)-88  
<sup>13</sup>C NMR

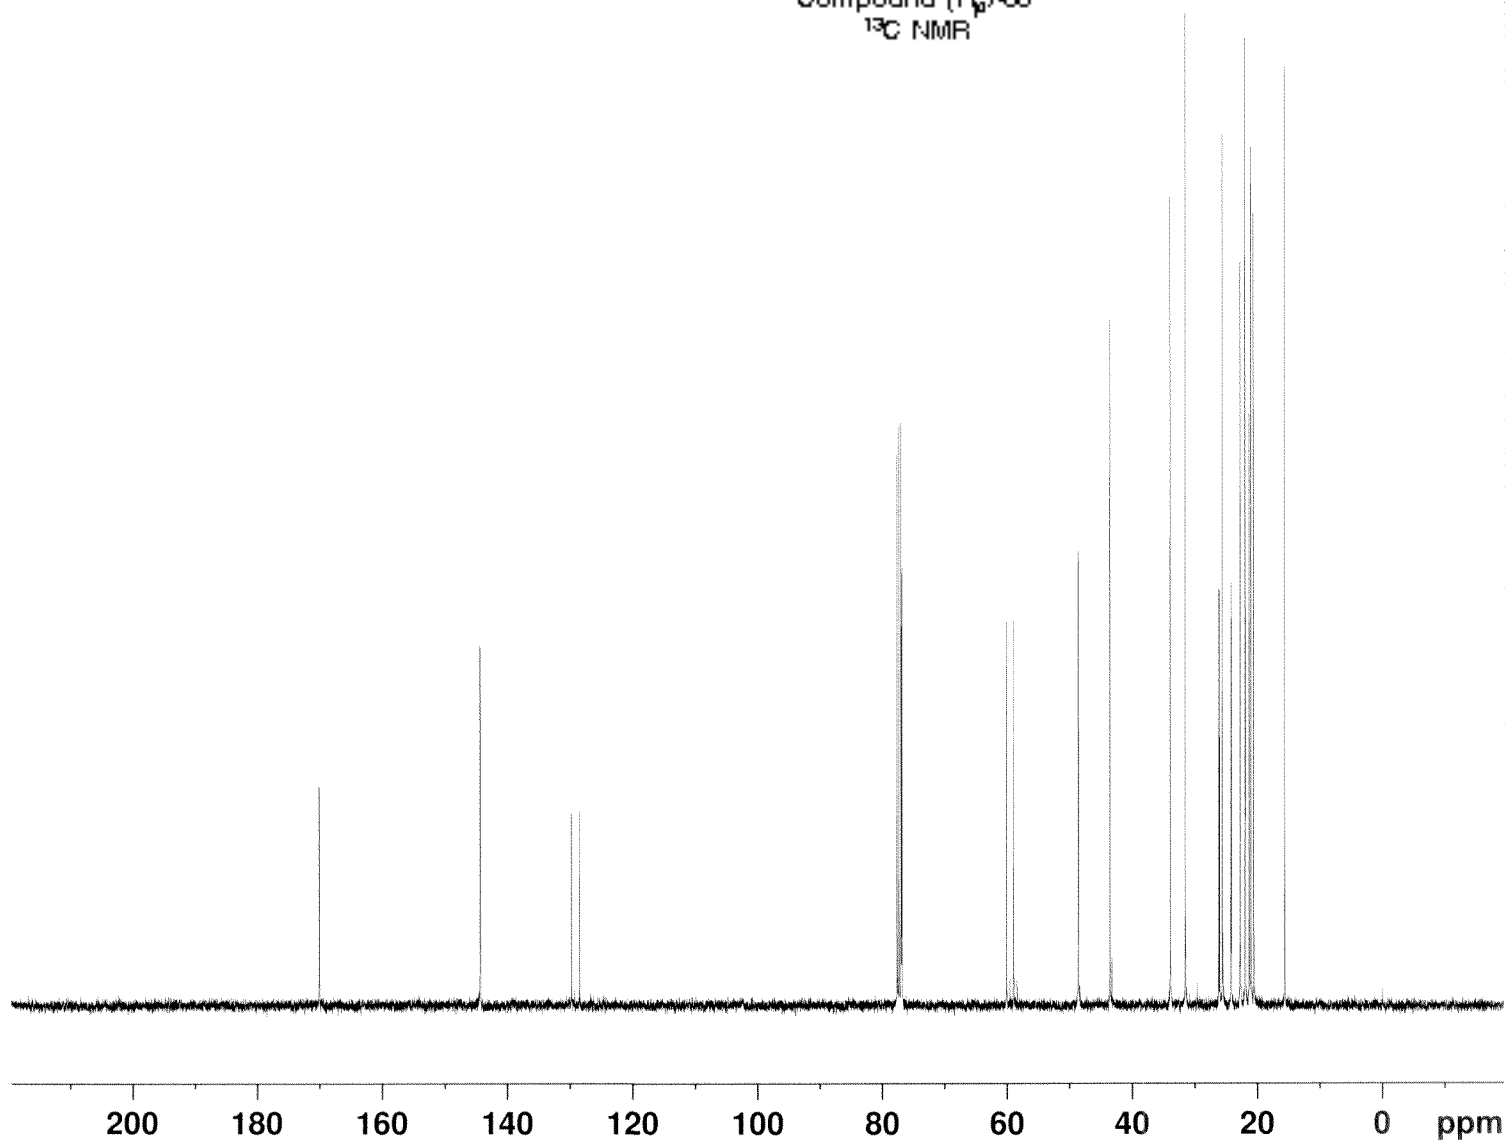

Current Data Parameters  
 NAME OB 2096 after column  
 EXPNO 4  
 PROCNO 1

F2 - Acquisition Parameters  
 Date\_ 20150701  
 Time 10.21  
 INSTRUM spect  
 PROBHD 5 mm PABBO BB/  
 PULPROG zgpg30  
 TD 65536  
 SOLVENT CDCl3  
 NS 101  
 DS 4  
 SWH 24038.461 Hz  
 FIDRES 0.366798 Hz  
 AQ 1.3631488 sec  
 RG 203.57  
 DW 20.800 usec  
 DE 6.50 usec  
 TE 294.9 K  
 D1 2.00000000 sec  
 D11 0.03000000 sec  
 TD0 1

==== CHANNEL f1 =====  
 SFO1 100.6228293 MHz  
 NUC1 13C  
 P1 10.00 usec  
 PLW1 45.00000000 W

==== CHANNEL f2 =====  
 SFO2 400.1316005 MHz  
 NUC2 1H  
 CPDPRG[2] waltz16  
 PCPD2 90.00 usec  
 PLW2 10.00000000 W  
 PLW12 0.31604999 W  
 PLW13 0.25600001 W

F2 - Processing parameters  
 SI 32768  
 SF 100.6127685 MHz  
 WDW EM  
 SSB 0  
 LB 1.00 Hz  
 GB 0  
 PC 1.40

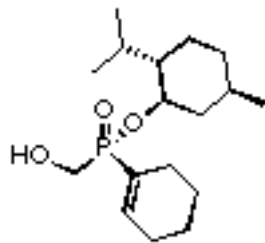

$^{31}\text{P}/^1\text{H}$  NMR decoupled

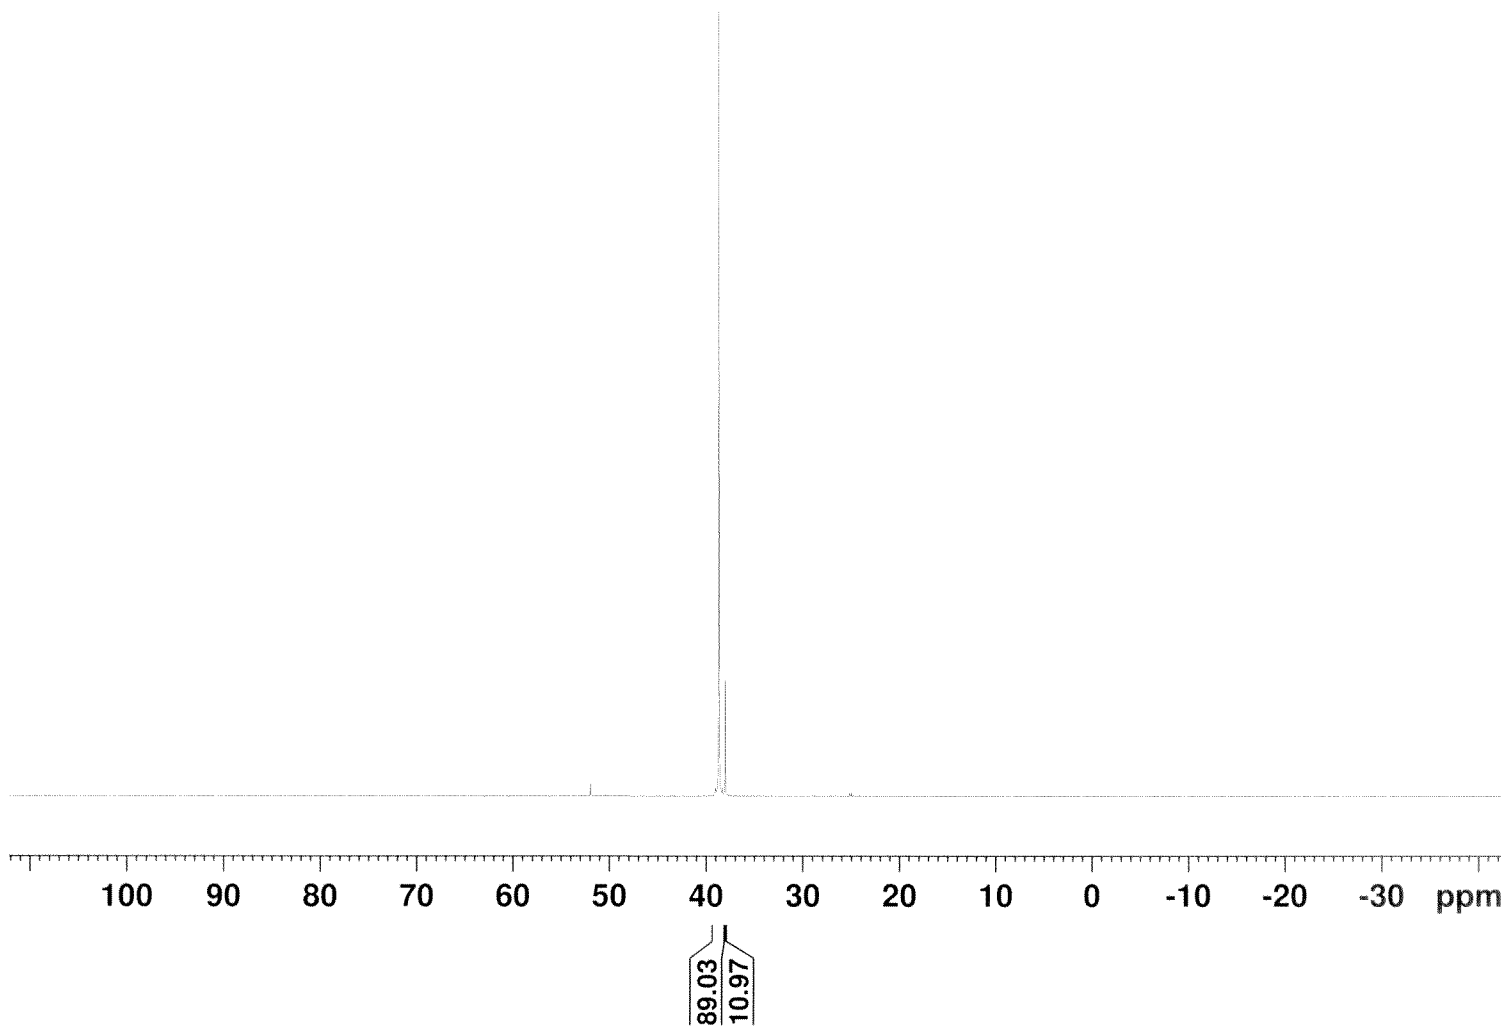

Current Data Parameters  
 NAME OB 2114 after column  
 EXPNO 5  
 PROCNO 1

F2 - Acquisition Parameters  
 Date\_ 20150715  
 Time 16.05  
 INSTRUM spect  
 PROBHD 5 mm PABBO BB/  
 PULPROG zgpg30  
 TD 65536  
 SOLVENT CDC13  
 NS 16  
 DS 4  
 SWH 64102.563 Hz  
 FIDRES 0.978127 Hz  
 AQ 0.5111808 sec  
 RG 203.57  
 DW 7.800 usec  
 DE 6.50 usec  
 TE 295.4 K  
 D1 2.00000000 sec  
 D11 0.03000000 sec  
 TD0 1

==== CHANNEL f1 =====  
 SFO1 161.9674942 MHz  
 NUC1 31P  
 P1 14.25 usec  
 PLW1 15.00000000 W

==== CHANNEL f2 =====  
 SFO2 400.1316005 MHz  
 NUC2 1H  
 CPDPRG[2] waltz16  
 PCPD2 90.00 usec  
 PLW2 10.00000000 W  
 PLW12 0.31604999 W  
 PLW13 0.25600001 W

F2 - Processing parameters  
 SI 32768  
 SF 161.9755930 MHz  
 WDW EM  
 SSB 0  
 LB 1.00 Hz  
 GB 0  
 PC 1.40

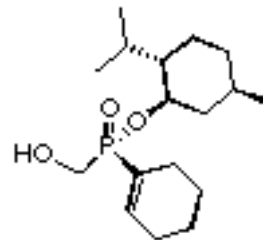

$^{31}\text{P}/^1\text{H}$  NMR coupled

Current Data Parameters  
 NAME OB 2114 after column  
 EXPNO 2  
 PROCNO 1

F2 - Acquisition Parameters  
 Date\_ 20150715  
 Time 16.07  
 INSTRUM spect  
 PROBHD 5 mm PABBO BB/  
 PULPROG zg30  
 TD 65536  
 SOLVENT CDCl3  
 NS 32  
 DS 4  
 SWH 64102.563 Hz  
 FIDRES 0.978127 Hz  
 AQ 0.5111808 sec  
 RG 203.57  
 DW 7.800 usec  
 DE 6.50 usec  
 TE 295.0 K  
 D1 2.00000000 sec  
 TD0 1

==== CHANNEL f1 =====  
 SFO1 161.9674942 MHz  
 NUC1 31P  
 P1 14.25 usec  
 PLW1 15.00000000 W

F2 - Processing parameters  
 SI 32768  
 SF 161.9755930 MHz  
 WDW EM  
 SSB 0  
 LB 1.00 Hz  
 GB 0  
 PC 1.40

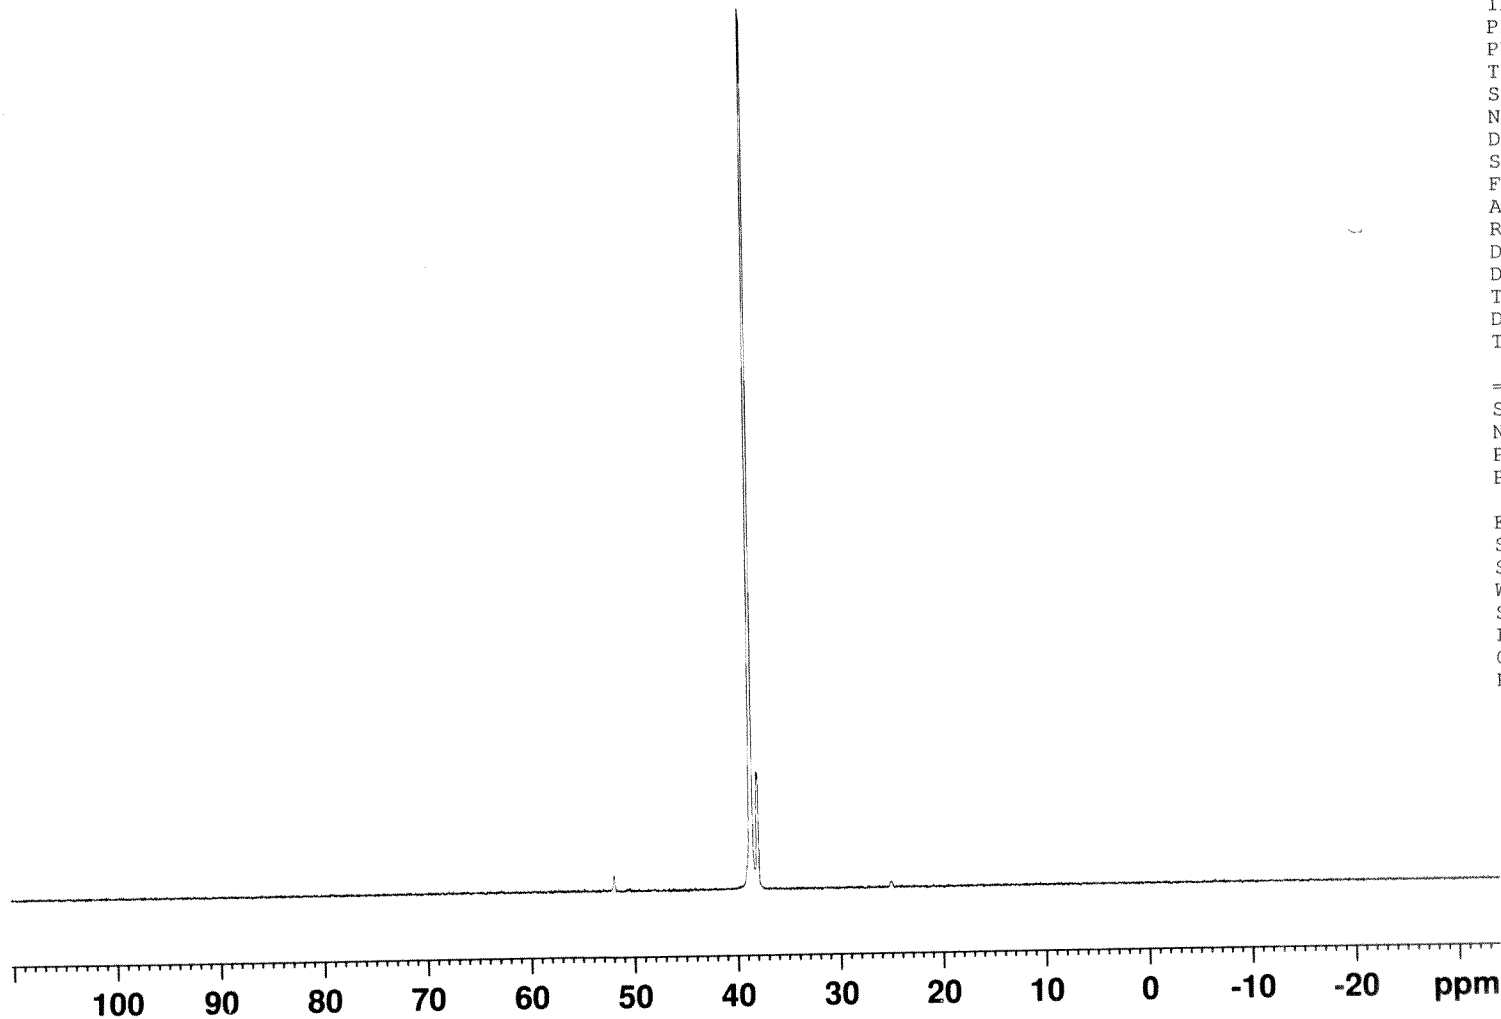

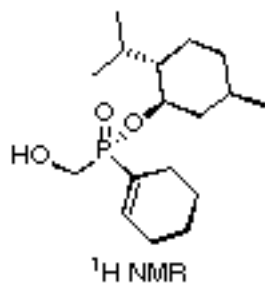

Current Data Parameters  
 NAME OB 2114 after column  
 EXPNO 3  
 PROCNO 1

F2 - Acquisition Parameters  
 Date\_ 20150715  
 Time 16.09  
 INSTRUM spect  
 PROBHD 5 mm PABBO BB/  
 PULPROG zg30  
 TD 65536  
 SOLVENT CDCl3  
 NS 10  
 DS 2  
 SWH 8012.820 Hz  
 FIDRES 0.122266 Hz  
 AQ 4.089465 sec  
 RG 12.96  
 DW 62.400 usec  
 DE 6.50 usec  
 TE 295.0 K  
 D1 1.0000000 sec  
 TD0 1

==== CHANNEL f1 =====  
 SF01 400.1324710 MHz  
 NUC1 1H  
 P1 10.00 usec  
 PLW1 25.00300026 W

F2 - Processing parameters  
 SI 65536  
 SF 400.1300000 MHz  
 WDW EM  
 SSB 0  
 LB 0.30 Hz  
 GB 0  
 PC 1.00

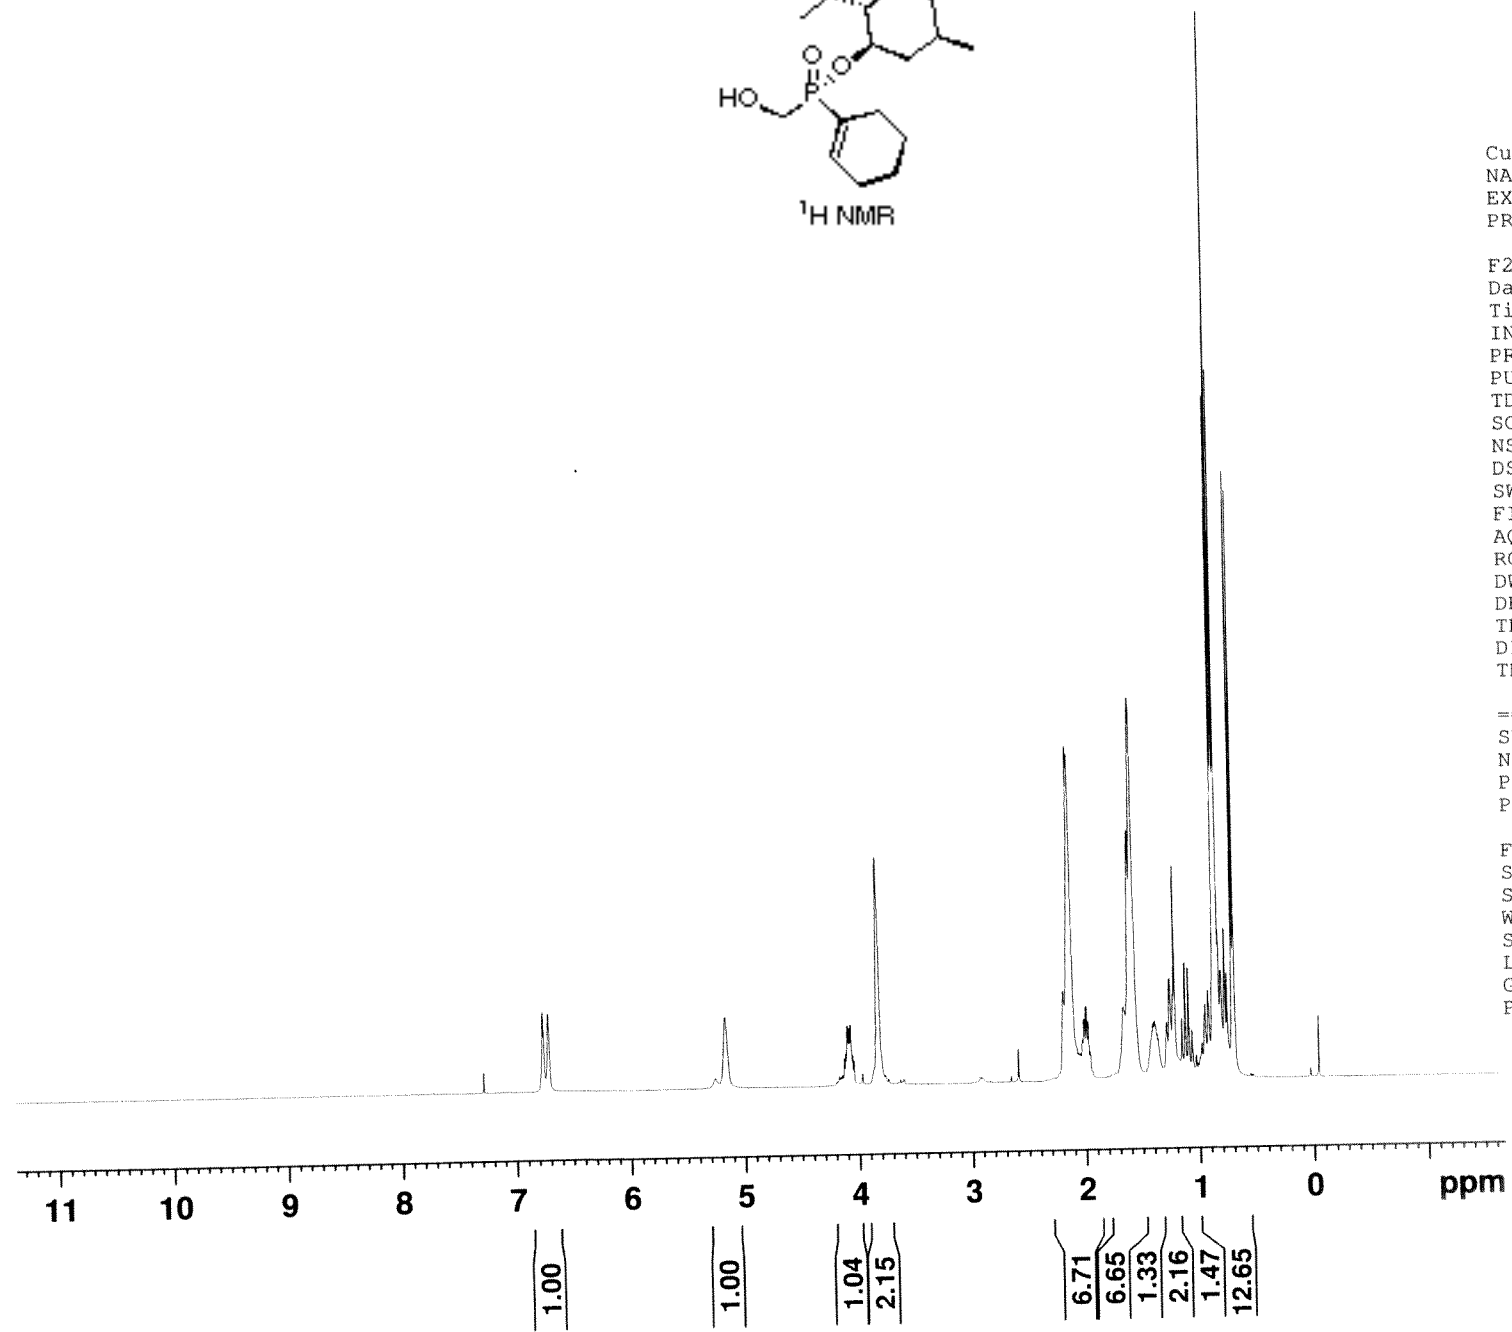

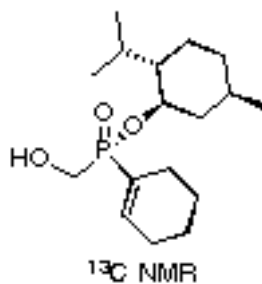

Current Data Parameters  
 NAME OB 2114 after column  
 EXPNO 4  
 PROCNO 1

F2 - Acquisition Parameters  
 Date\_ 20150715  
 Time 16.27  
 INSTRUM spect  
 PROBHD 5 mm PABBO BB/  
 PULPROG zgpg30  
 TD 65536  
 SOLVENT CDC13  
 NS 275  
 DS 4  
 SWH 24038.461 Hz  
 FIDRES 0.366798 Hz  
 AQ 1.3631488 sec  
 RG 203.57  
 DW 20.800 usec  
 DE 6.50 usec  
 TE 295.8 K  
 D1 2.00000000 sec  
 D11 0.03000000 sec  
 TD0 1

==== CHANNEL f1 =====  
 SFO1 100.6228293 MHz  
 NUC1 13C  
 P1 10.00 usec  
 PLW1 45.00000000 W

==== CHANNEL f2 =====  
 SFO2 400.1316005 MHz  
 NUC2 1H  
 CPDPRG[2] waltz16  
 PCPD2 90.00 usec  
 PLW2 10.00000000 W  
 PLW12 0.31604999 W  
 PLW13 0.25600001 W

F2 - Processing parameters  
 SI 32768  
 SF 100.6127685 MHz  
 WDW EM  
 SSB 0  
 LB 1.00 Hz  
 GB 0  
 PC 1.40

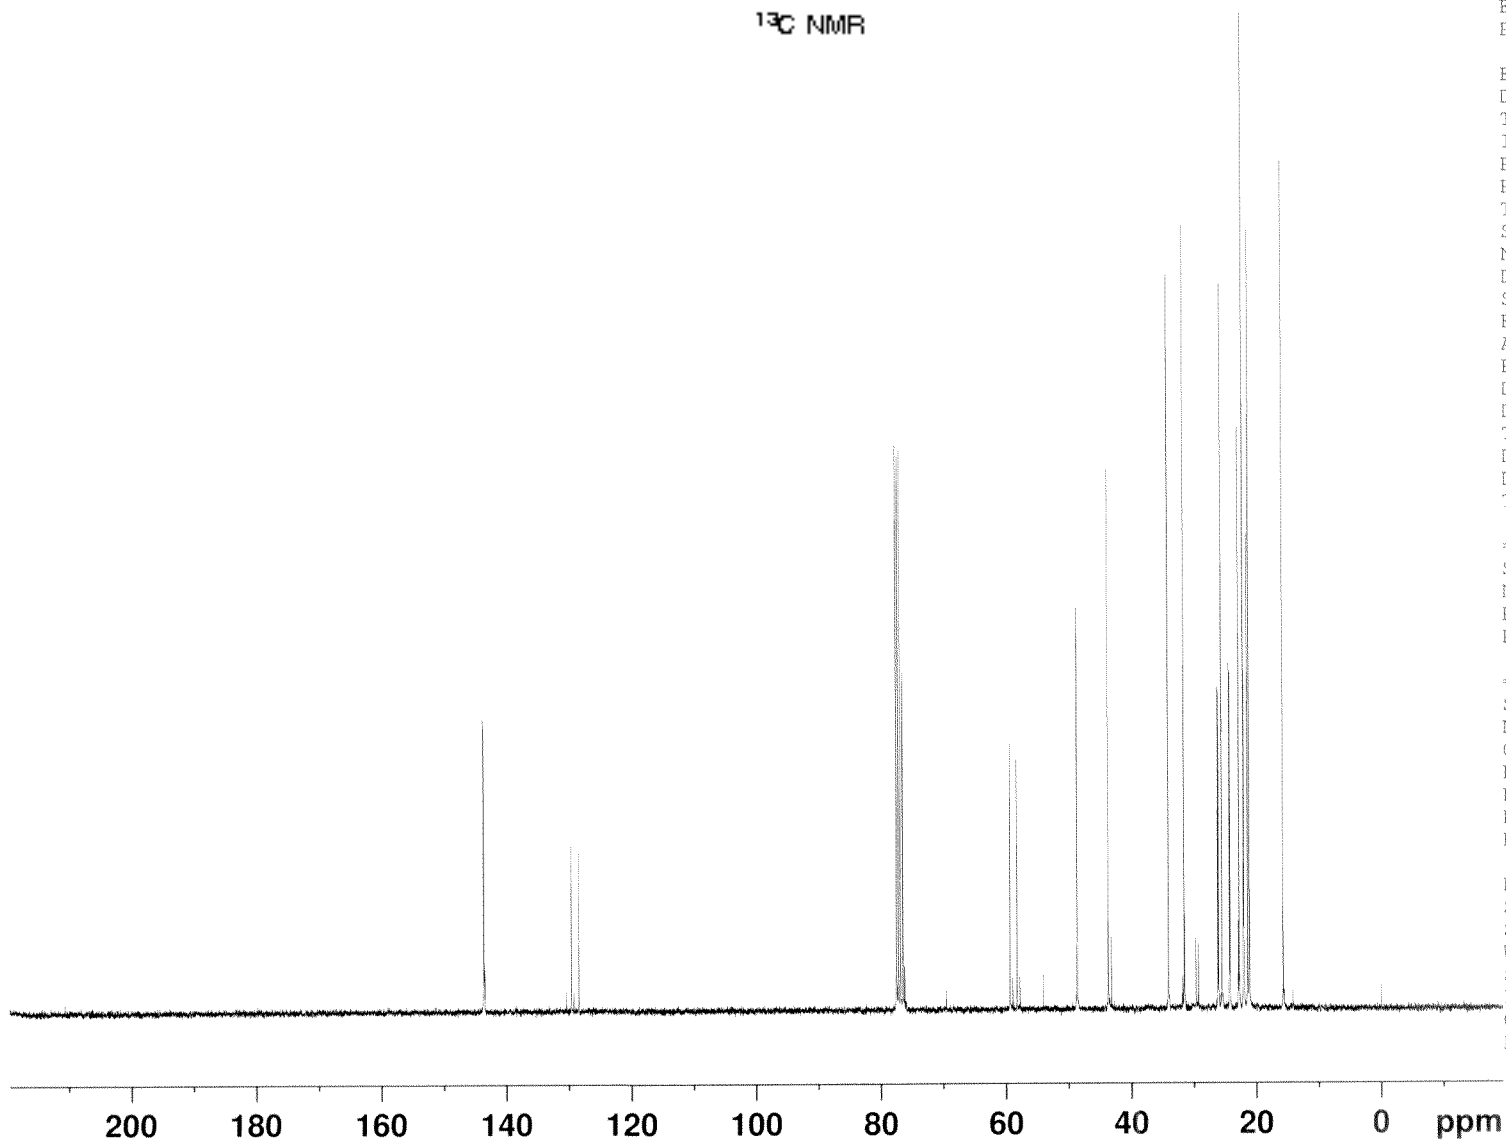



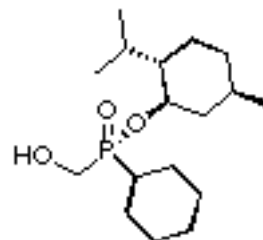

Compound (R<sub>p</sub>)-39  
<sup>31</sup>P/<sup>1</sup>H NMR decoupled

Current Data Parameters  
 NAME OB 2115 dry  
 EXPNO 1  
 PROCNO 1

F2 - Acquisition Parameters  
 Date\_ 20150716  
 Time 17.30  
 INSTRUM spect  
 PROBHD 5 mm PABBO BB/  
 PULPROG zgpg30  
 TD 65536  
 SOLVENT CDCl3  
 NS 16  
 DS 4  
 SWH 64102.563 Hz  
 FIDRES 0.978127 Hz  
 AQ 0.5111808 sec  
 RG 203.57  
 DW 7.800 usec  
 DE 6.50 usec  
 TE 295.5 K  
 D1 2.00000000 sec  
 D11 0.03000000 sec  
 TD0 1

==== CHANNEL f1 =====  
 SFO1 161.9674942 MHz  
 NUC1 31P  
 P1 14.25 usec  
 PLW1 15.00000000 W

==== CHANNEL f2 =====  
 SFO2 400.1316005 MHz  
 NUC2 1H  
 CPDPRG[2] waltz16  
 PCPD2 90.00 usec  
 PLW2 10.00000000 W  
 PLW12 0.31604999 W  
 PLW13 0.25600001 W

F2 - Processing parameters  
 SI 32768  
 SF 161.9755930 MHz  
 WDW EM  
 SSB 0  
 LB 1.00 Hz  
 GB 0  
 PC 1.40

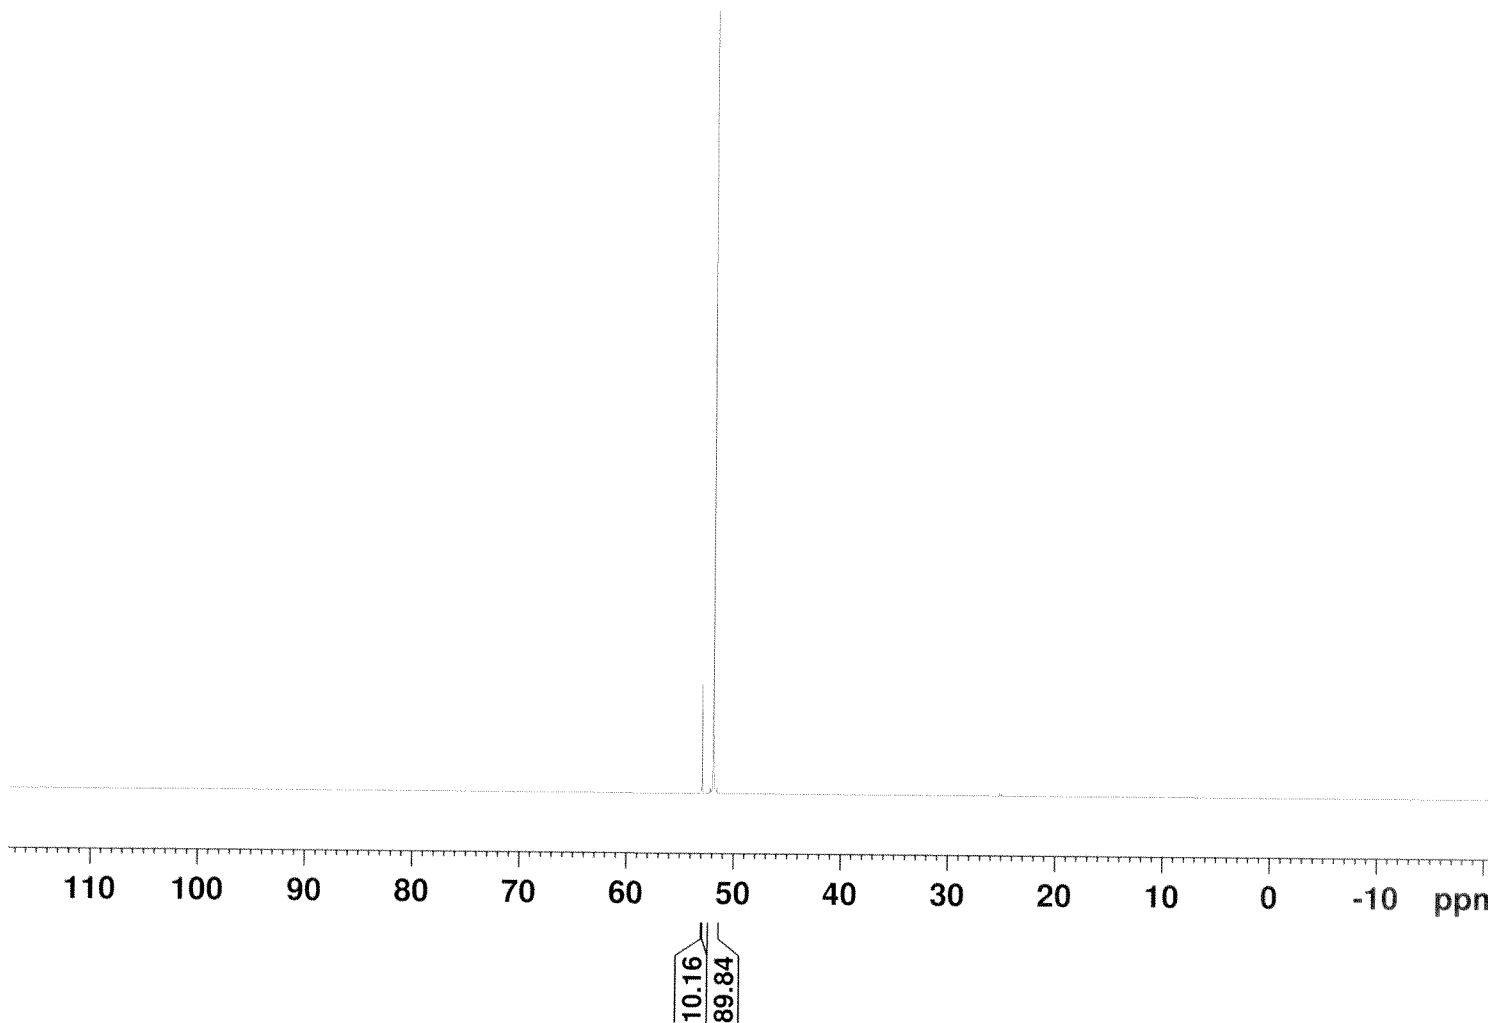

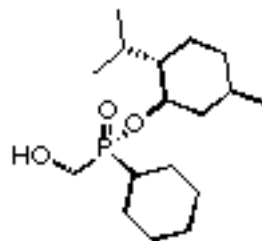

Compound (R<sub>p</sub>)-39  
<sup>31</sup>P/<sup>1</sup>H NMR coupled

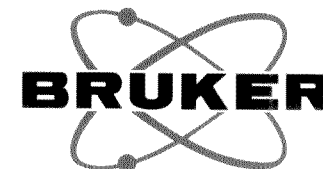

Current Data Parameters  
 NAME OB 2115 dry  
 EXPNO 2  
 PROCNO 1

F2 - Acquisition Parameters  
 Date\_ 20150716  
 Time 17.33  
 INSTRUM spect  
 PROBHD 5 mm PABBO BB/  
 PULPROG zg30  
 TD 65536  
 SOLVENT CDCl3  
 NS 32  
 DS 4  
 SWH 64102.563 Hz  
 FIDRES 0.978127 Hz  
 AQ 0.5111808 sec  
 RG 203.57  
 DW 7.800 usec  
 DE 6.50 usec  
 TE 295.1 K  
 D1 2.00000000 sec  
 TD0 1

==== CHANNEL f1 =====  
 SFO1 161.9674942 MHz  
 NUC1 31P  
 P1 14.25 usec  
 PLW1 15.00000000 W

F2 - Processing parameters  
 SI 32768  
 SF 161.9755930 MHz  
 WDW EM  
 SSB 0  
 LB 1.00 Hz  
 GB 0  
 PC 1.40

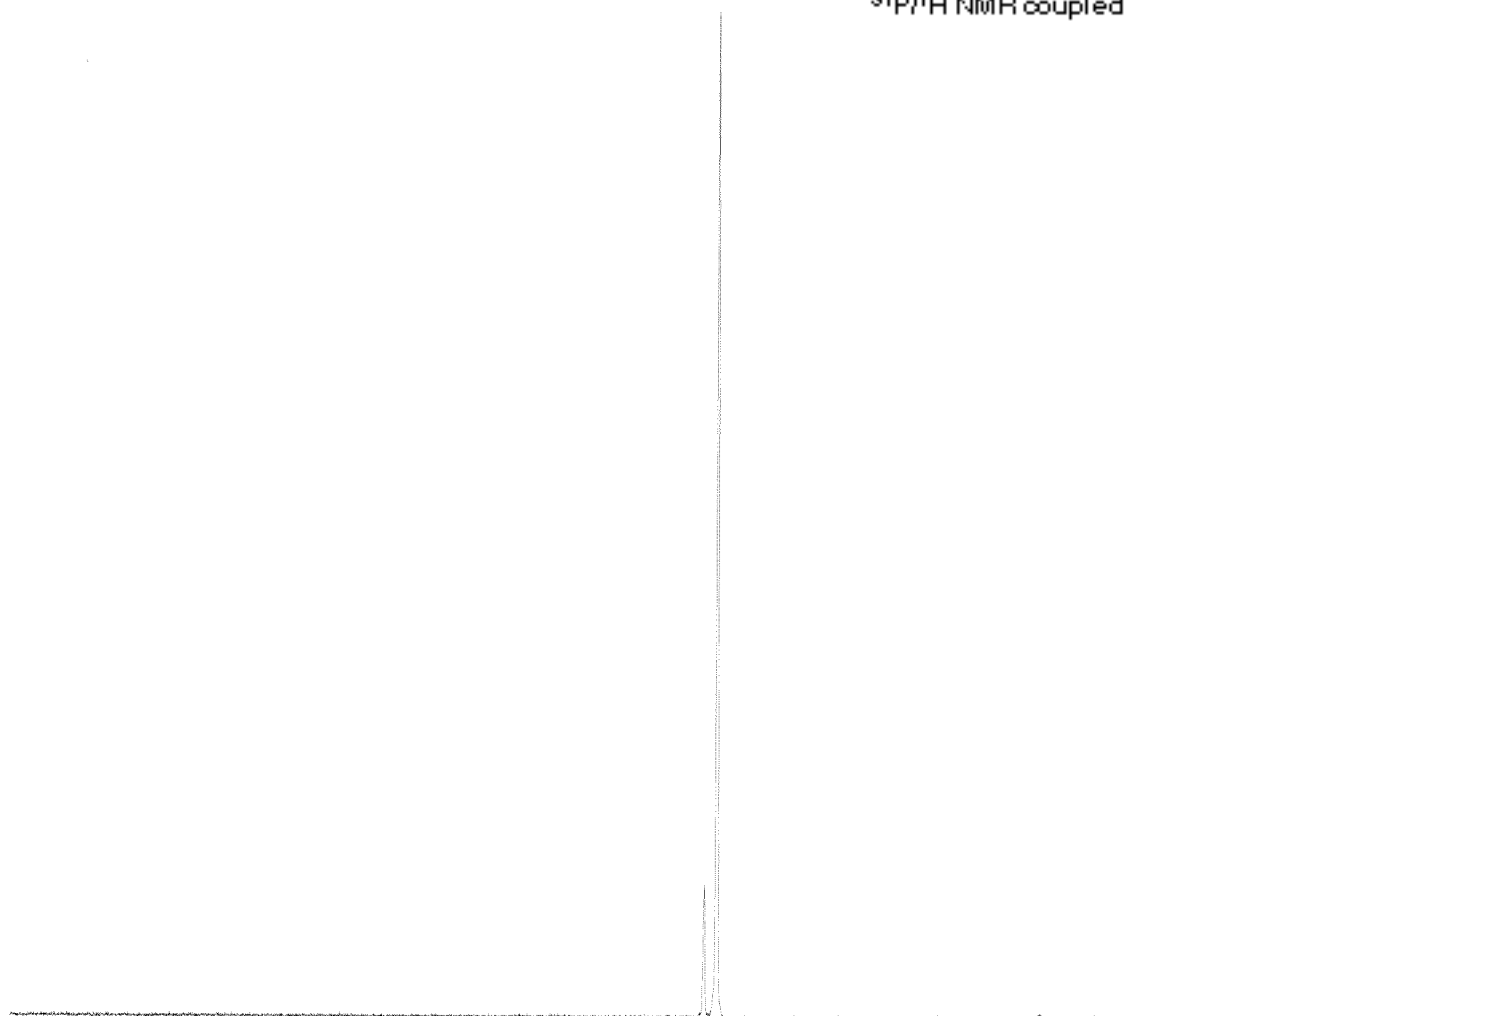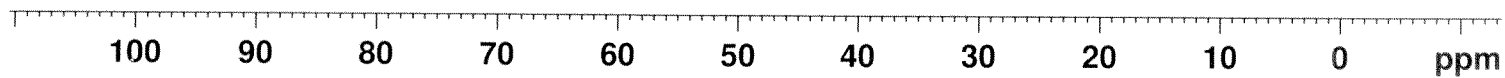

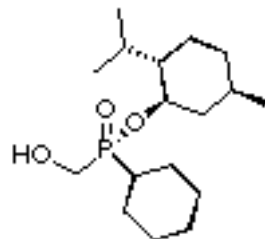

Compound (R<sub>p</sub>)-39  
<sup>1</sup>H NMR

Current Data Parameters  
 NAME OB 2115 dry  
 EXPNO 3  
 PROCNO 1

F2 - Acquisition Parameters  
 Date\_ 20150716  
 Time 17.34  
 INSTRUM spect  
 PROBHD 5 mm PABBO BB/  
 PULPROG zg30  
 TD 65536  
 SOLVENT CDC13  
 NS 9  
 DS 2  
 SWH 8012.820 Hz  
 FIDRES 0.122266 Hz  
 AQ 4.0894465 sec  
 RG 16.39  
 DW 62.400 usec  
 DE 6.50 usec  
 TE 295.1 K  
 D1 1.00000000 sec  
 TD0 1

==== CHANNEL f1 =====  
 SFO1 400.1324710 MHz  
 NUC1 1H  
 P1 10.00 usec  
 PLW1 25.00300026 W

F2 - Processing parameters  
 SI 65536  
 SF 400.130000 MHz  
 WDW EM  
 SSB 0  
 LB 0.30 Hz  
 GB 0  
 PC 1.00

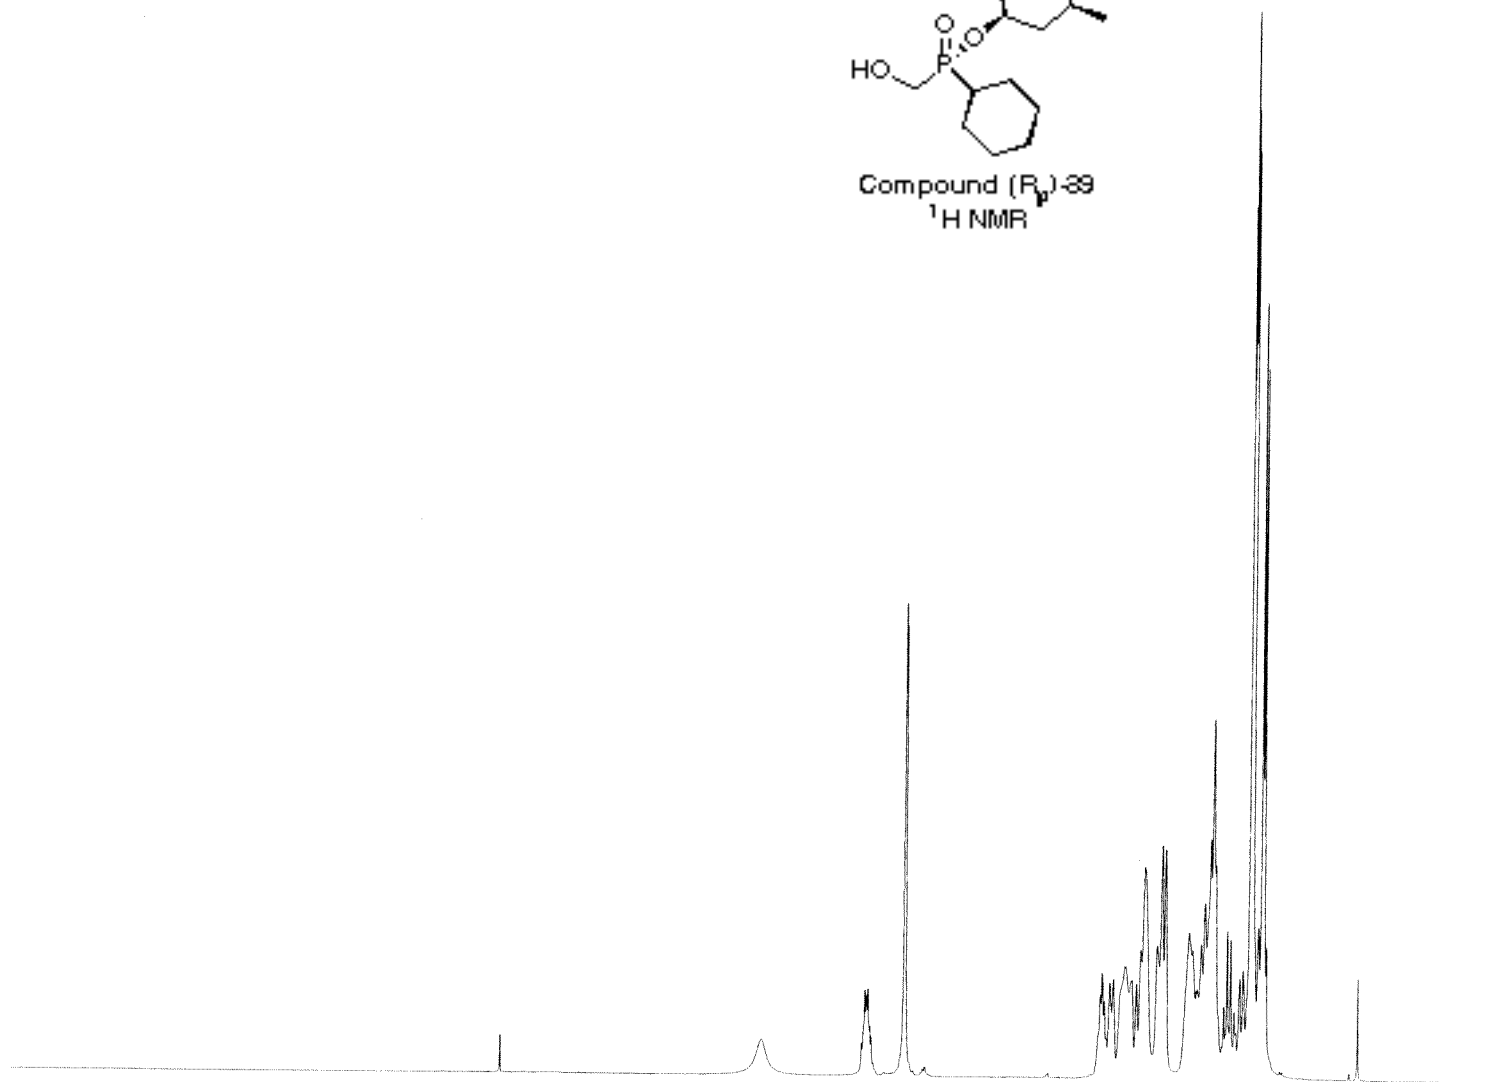

11 10 9 8 7 6 5 4 3 2 1 0 ppm

0.92 1.02 2.00 1.97 5.18 3.13 9.16 11.59

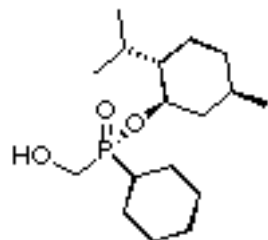

Compound (R<sub>p</sub>)-39  
<sup>13</sup>C NMR

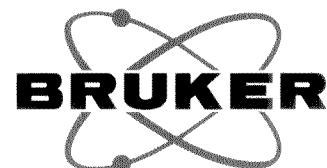

Current Data Parameters  
 NAME OB 2115 dry  
 EXPNO 4  
 PROCNO 1

F2 - Acquisition Parameters  
 Date\_ 20150716  
 Time 17.55  
 INSTRUM spect  
 PROBHD 5 mm PABBO BB/  
 PULPROG zgpg30  
 TD 65536  
 SOLVENT CDCl3  
 NS 318  
 DS 4  
 SWH 24038.461 Hz  
 FIDRES 0.366798 Hz  
 AQ 1.3631488 sec  
 RG 203.57  
 DW 20.800 usec  
 DE 6.50 usec  
 TE 295.9 K  
 D1 2.0000000 sec  
 D11 0.03000000 sec  
 TD0 1

==== CHANNEL f1 =====  
 SFO1 100.6228293 MHz  
 NUC1 13C  
 P1 10.00 usec  
 PLW1 45.00000000 W

==== CHANNEL f2 =====  
 SFO2 400.1316005 MHz  
 NUC2 1H  
 CPDPRG[2] waltz16  
 PCPD2 90.00 usec  
 PLW2 10.00000000 W  
 PLW12 0.31604999 W  
 PLW13 0.25600001 W

F2 - Processing parameters  
 SI 32768  
 SF 100.6127685 MHz  
 WDW EM  
 SSB 0  
 LB 1.00 Hz  
 GB 0  
 PC 1.40

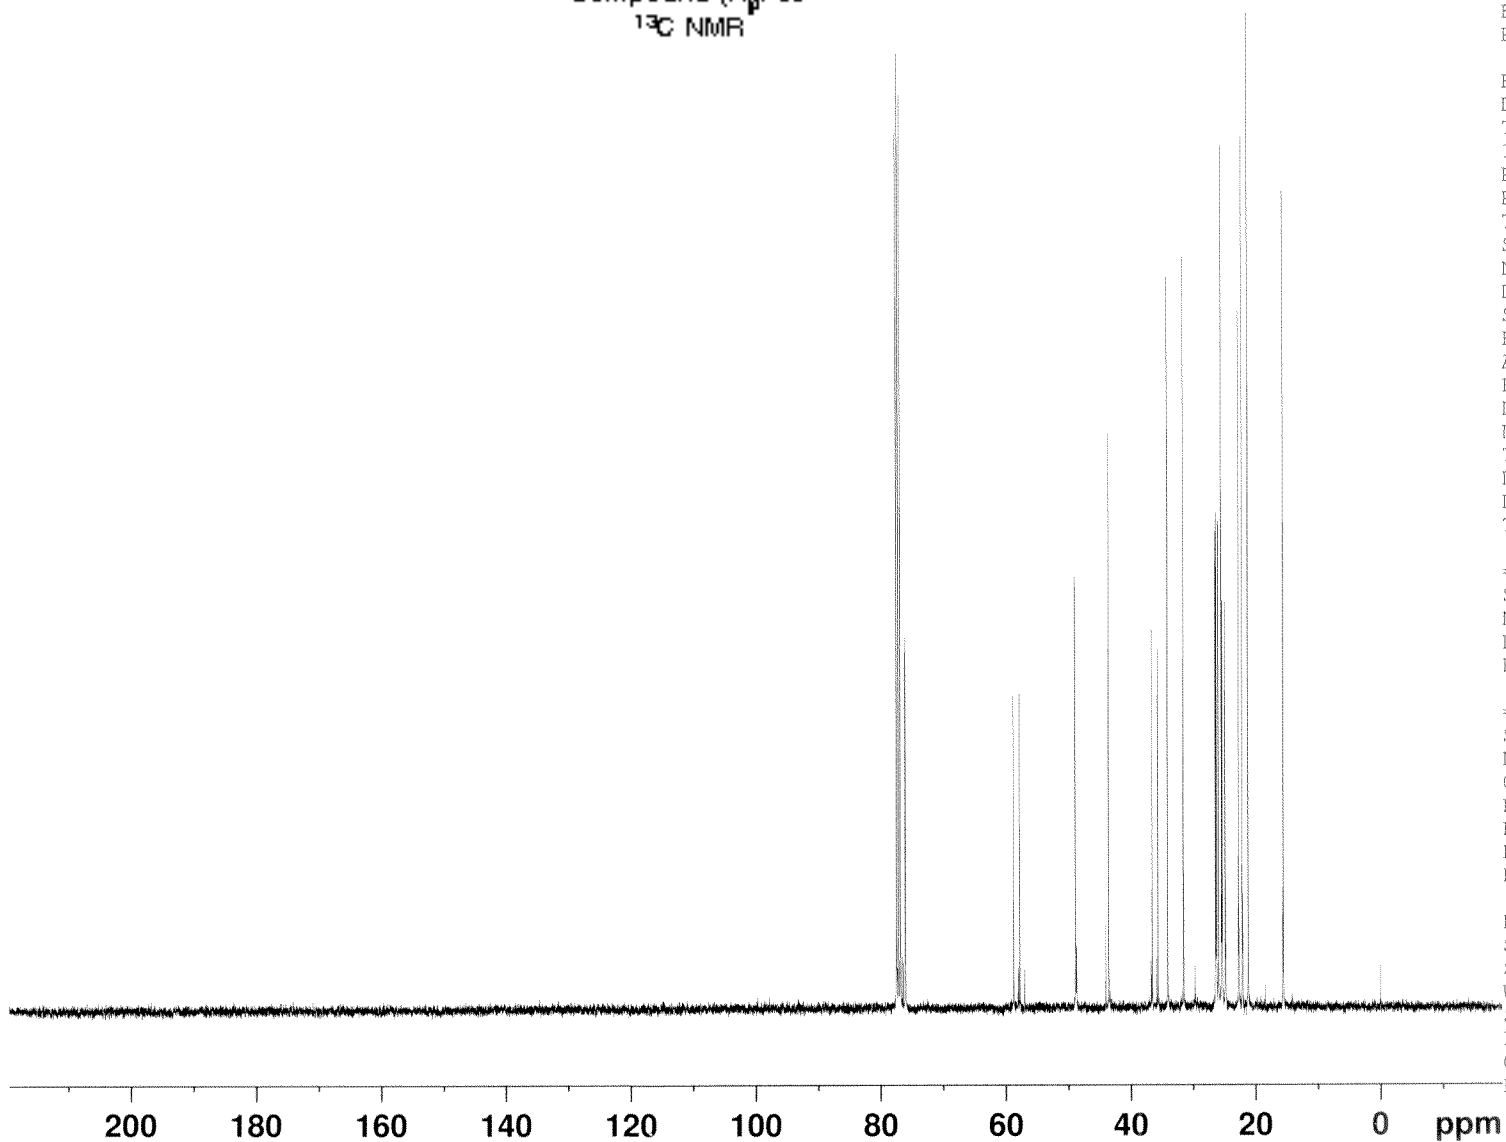

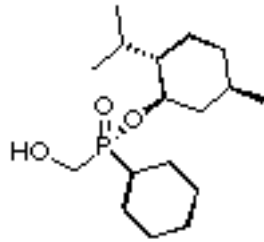

Compound (R)-39  
<sup>31</sup>P/<sup>1</sup>H NMR decoupled

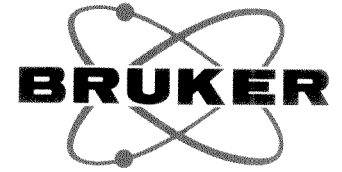

Current Data Parameters  
 NAME OB 1930 2nd crystallization in CH3CN  
 EXPNO 1  
 PROCNO 1

F2 - Acquisition Parameters  
 Date\_ 20150210  
 Time\_ 10.27  
 INSTRUM spect  
 PROBHD 5 mm PABBO BB/  
 PULPROG zgpg30  
 TO 65536  
 SOLVENT CDCl3  
 NS 16  
 DS 4  
 SWH 64102.563 Hz  
 FIDRES 0.978127 Hz  
 AQ 0.511808 sec  
 RG 203.57  
 DW 7.800 usec  
 DE 6.50 usec  
 TE 296.4 K  
 D1 2.00000000 sec  
 D11 0.03000000 sec  
 TDO 1

\*\*\*\*\* CHANNEL f1 \*\*\*\*\*  
 SFO1 161.9674942 MHz  
 NUC1 <sup>31</sup>P  
 P1 14.25 usec  
 PLW1 15.00000000 W

\*\*\*\*\* CHANNEL f2 \*\*\*\*\*  
 SFO2 400.1316005 MHz  
 NUC2 <sup>1</sup>H  
 CPDPRGf2 waltz16  
 PCPD2 90.00 usec  
 PLW2 10.00000000 W  
 PLW12 0.31604999 W  
 PLW13 0.25600001 W

F2 - Processing parameters  
 SI 32768  
 SF 161.9755930 MHz  
 WDW EM  
 SCB 0  
 LB 1.00 Hz  
 GB 0  
 PC 1.40

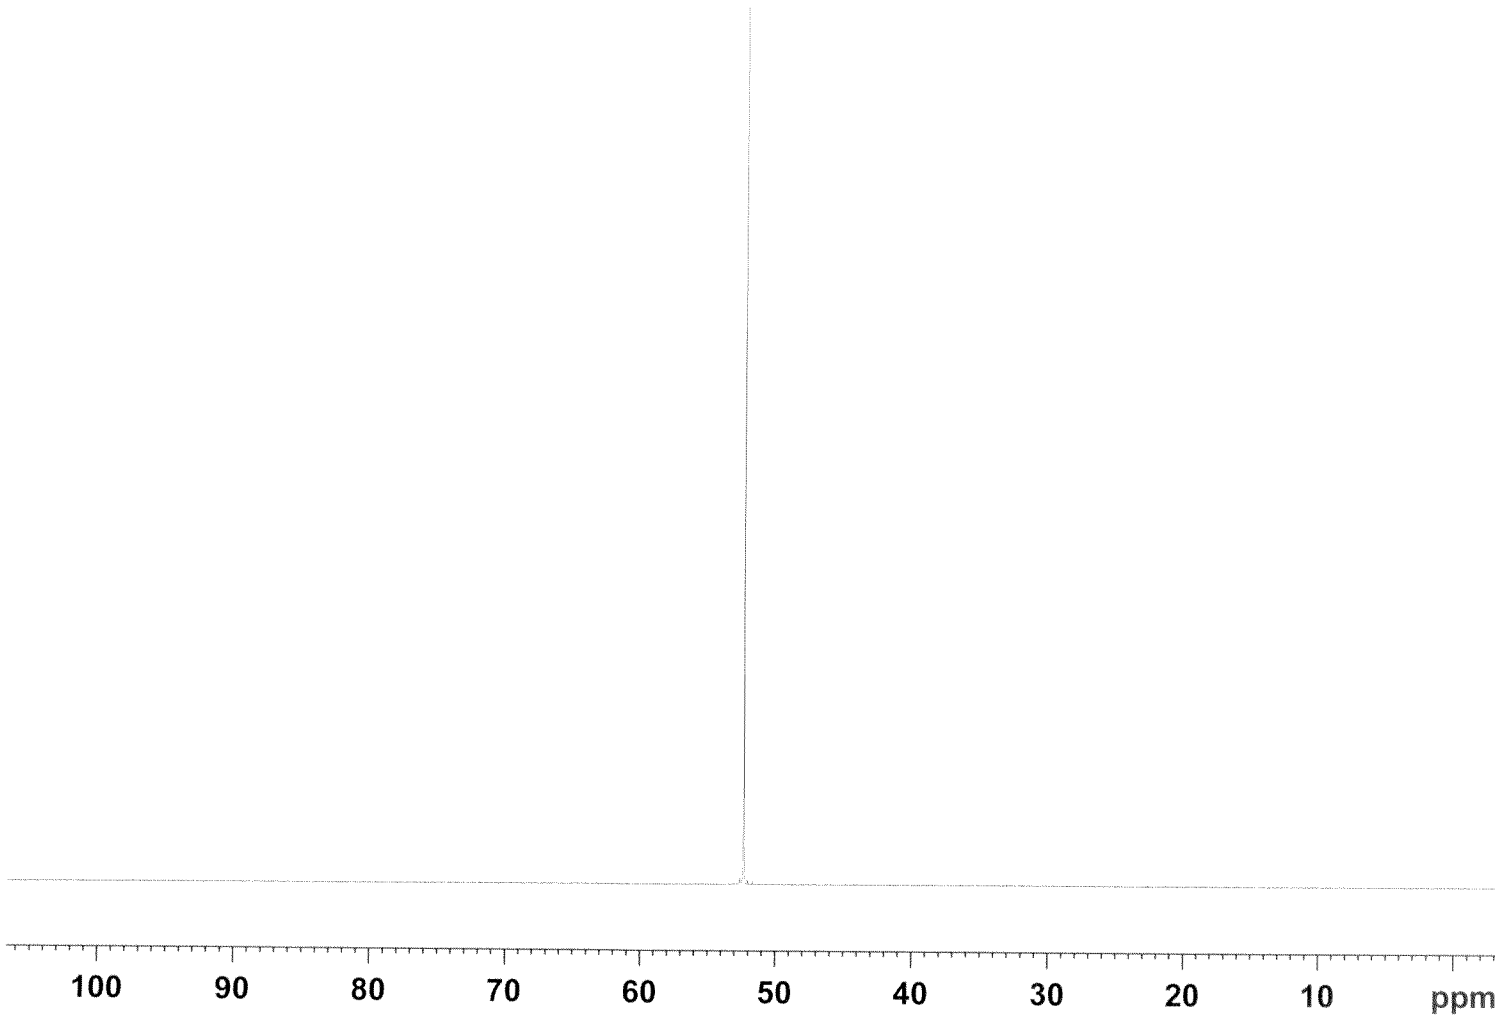

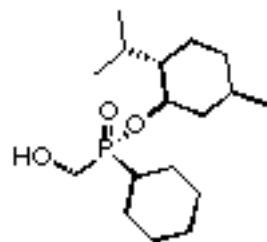

Compound (Rp)-39  
<sup>31</sup>P/<sup>1</sup>H NMR coupled

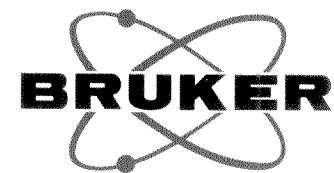

Current Data Parameters  
 NAME OB 1930 2nd crystallization in CH3CN  
 EXPNO 2  
 PROCNO 1

F2 - Acquisition Parameters  
 Date 20150210  
 Time 10.29  
 INSTRUM spect  
 PROBHD 5 mm PABBO BB/  
 PULPROG zg30  
 TD 65536  
 SOLVENT CDC13  
 NS 32  
 DS 4  
 SWH 64102.563 Hz  
 FIDRES 0.978127 Hz  
 AQ 0.5111808 sec  
 RG 203.57  
 EW 7.800 usec  
 DE 6.50 usec  
 TE 296.1 K  
 D1 2.00000000 sec  
 TDO 1

\*\*\*\*\* CHANNEL f1 \*\*\*\*\*  
 SF01 161.9674942 MHz  
 NUC1 31P  
 P1 14.25 usec  
 PLW1 15.00000000 W

F2 - Processing parameters  
 SI 32768  
 SF 161.9755930 MHz  
 WDW EM  
 SSB 0  
 LB 1.00 Hz  
 GB 0  
 PC 1.40

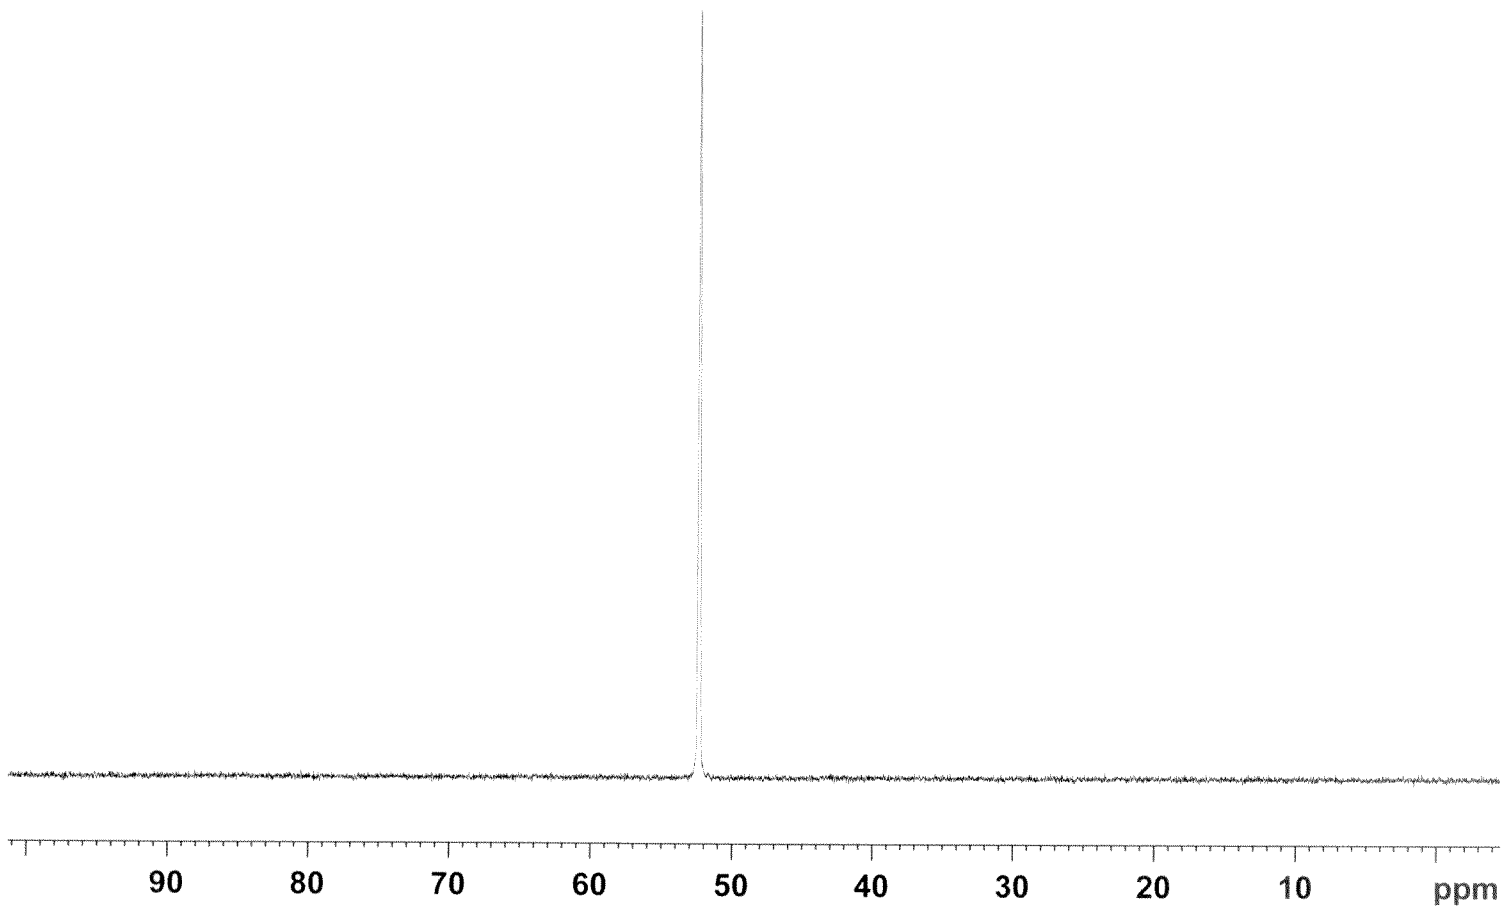

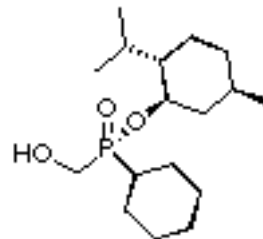

Compound (R<sub>p</sub>)-39  
<sup>1</sup>H NMR

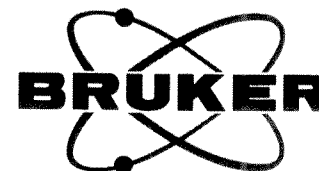

Current Data Parameters  
 NAME OB 1930 2nd crystallization in CH3CN  
 EXPNO 3  
 PROCNO 1

F2 - Acquisition Parameters  
 Date\_ 20150210  
 Time 10.32  
 INSTRUM spect  
 PROBHD 5 mm PABBO BB/  
 PULPROG zg30  
 TD 65536  
 SOLVENT CDC13  
 NS 10  
 DS 2  
 SWH 8012.820 Hz  
 FIDRES 0.122266 Hz  
 AQ 4.0894465 sec  
 RG 32.38  
 DW 62.400 usec  
 DE 6.50 usec  
 TE 296.1 K  
 D1 1.0000000 sec  
 TDO 1

\*\*\*\*\* CHANNEL f1 \*\*\*\*\*  
 SFO1 400.1324710 MHz  
 NUC1 1H  
 P1 10.00 usec  
 PLW1 25.00300026 W

F2 - Processing parameters  
 SI 65536  
 SF 400.1300000 MHz  
 WDW EM  
 SSB 0  
 LB 0.30 Hz  
 GB 0  
 PC 1.00

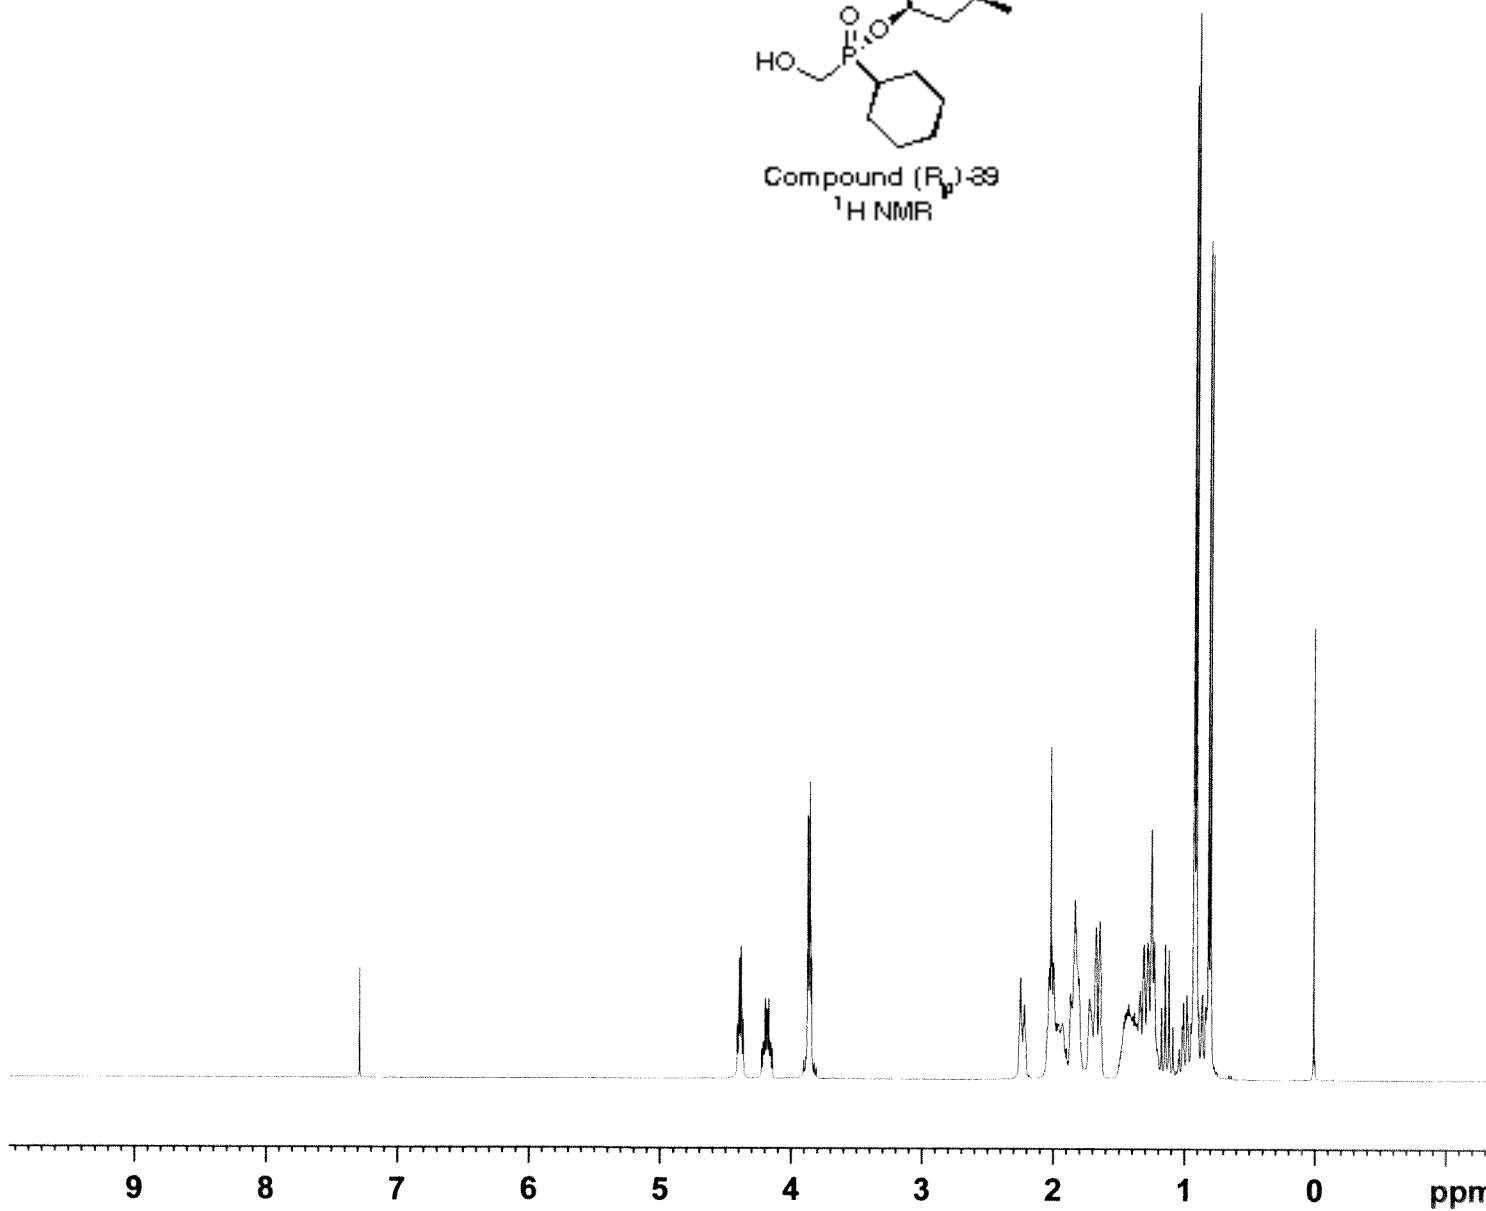

1.00  
 0.99  
 1.97  
 1.17  
 3.38  
 2.88  
 3.01  
 7.01  
 1.10  
 7.61  
 3.40

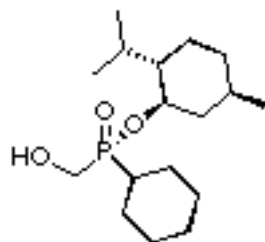

Compound (R<sub>f</sub>)-39  
<sup>13</sup>C NMR

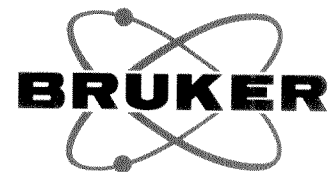

Current Data Parameters  
 NAME OS 1930 2nd crystallization in CH3CN  
 EXPNO 4  
 PROCNO 1

F2 - Acquisition Parameters  
 Date\_ 20150210  
 Time 10.56  
 INSTRUM spect  
 PULPROG 5 mm PABBO BB/  
 PULPROG zgpg30  
 TD 65536  
 SOLVENT CDCl3  
 NS 383  
 DS 4  
 SWH 24038.461 Hz  
 FIDRES 0.366798 Hz  
 AQ 1.3631488 sec  
 RG 203.57  
 DW 20.800 usec  
 DE 6.50 usec  
 TE 297.5 K  
 D1 2.0000000 sec  
 D11 0.0300000 sec  
 TDO 1

===== CHANNEL f1 =====  
 SFO1 100.6228293 MHz  
 NUC1 13C  
 P1 10.00 usec  
 PLW1 45.0000000 W

===== CHANNEL f2 =====  
 SFO2 400.1316005 MHz  
 NUC2 1H  
 CPDPRG12 waltz16  
 PCPD2 90.00 usec  
 PLW2 10.0000000 W  
 PLW12 0.31604999 W  
 PLW13 0.25600001 W

F2 - Processing parameters  
 SI 32768  
 SF 100.6127683 MHz  
 WDW EM  
 SSB 0  
 LB 1.00 Hz  
 GB 0  
 PC 1.40

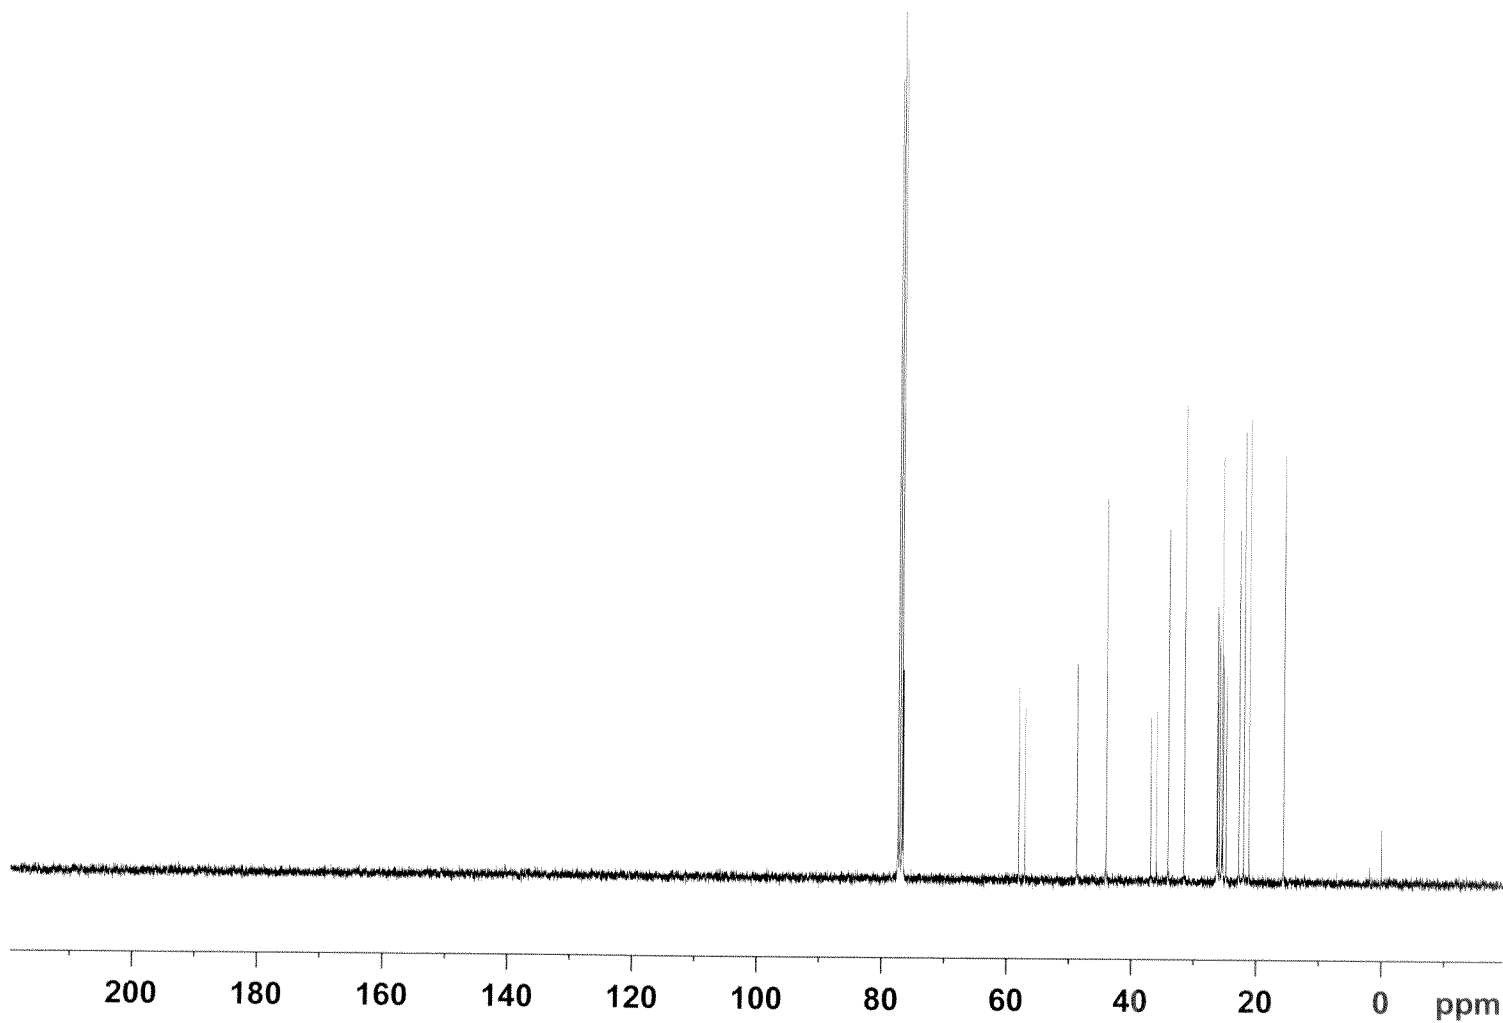



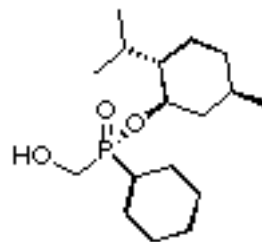

Compound (Rp)-39  
<sup>31</sup>P/<sup>1</sup>H NMR decoupled

Current Data Parameters  
 NAME OB 2148 4th crystallization  
 EXPNO 1  
 PROCNO 1

F2 - Acquisition Parameters  
 Date\_ 20150902  
 Time 17.35  
 INSTRUM spect  
 PROBHD 5 mm PABBO BB/  
 PULPROG zgpg30  
 TD 65536  
 SOLVENT Acetone  
 NS 16  
 DS 4  
 SWH 64102.563 Hz  
 FIDRES 0.978127 Hz  
 AQ 0.5111808 sec  
 RG 203.57  
 DW 7.800 usec  
 DE 6.50 usec  
 TE 295.1 K  
 D1 2.00000000 sec  
 D11 0.03000000 sec  
 TD0 1

==== CHANNEL f1 =====  
 SFO1 161.9674942 MHz  
 NUC1 31P  
 P1 14.25 usec  
 PLW1 15.00000000 W

==== CHANNEL f2 =====  
 SFO2 400.1316005 MHz  
 NUC2 1H  
 CPDPRG[2] waltz16  
 PCPD2 90.00 usec  
 PLW2 10.00000000 W  
 PLW12 0.31604999 W  
 PLW13 0.25600001 W

F2 - Processing parameters  
 SI 32768  
 SF 161.9755930 MHz  
 WDW EM  
 SSB 0  
 LB 1.00 Hz  
 GB 0  
 PC 1.40

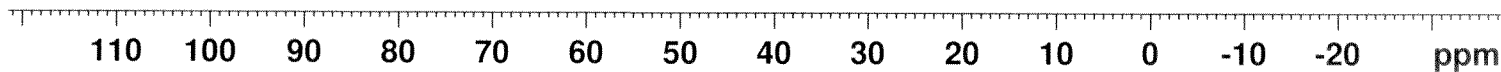

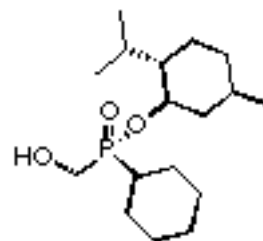

Compound (R<sub>v</sub>)-89  
31P/1H NMR coupled

Current Data Parameters  
NAME OB 2148 4th crystallization  
EXPNO 2  
PROCNO 1

F2 - Acquisition Parameters  
Date\_ 20150902  
Time 17.37  
INSTRUM spect  
PROBHD 5 mm PABBO BB/  
PULPROG zg30  
TD 65536  
SOLVENT Acetone  
NS 32  
DS 4  
SWH 64102.563 Hz  
FIDRES 0.978127 Hz  
AQ 0.5111808 sec  
RG 203.57  
DW 7.800 usec  
DE 6.50 usec  
TE 294.7 K  
D1 2.0000000 sec  
TDO 1

==== CHANNEL f1 =====  
SFO1 161.9674942 MHz  
NUC1 31P  
P1 14.25 usec  
PLW1 15.0000000 W

F2 - Processing parameters  
SI 32768  
SF 161.9755930 MHz  
WDW EM  
SSB 0  
LB 1.00 Hz  
GB 0  
PC 1.40

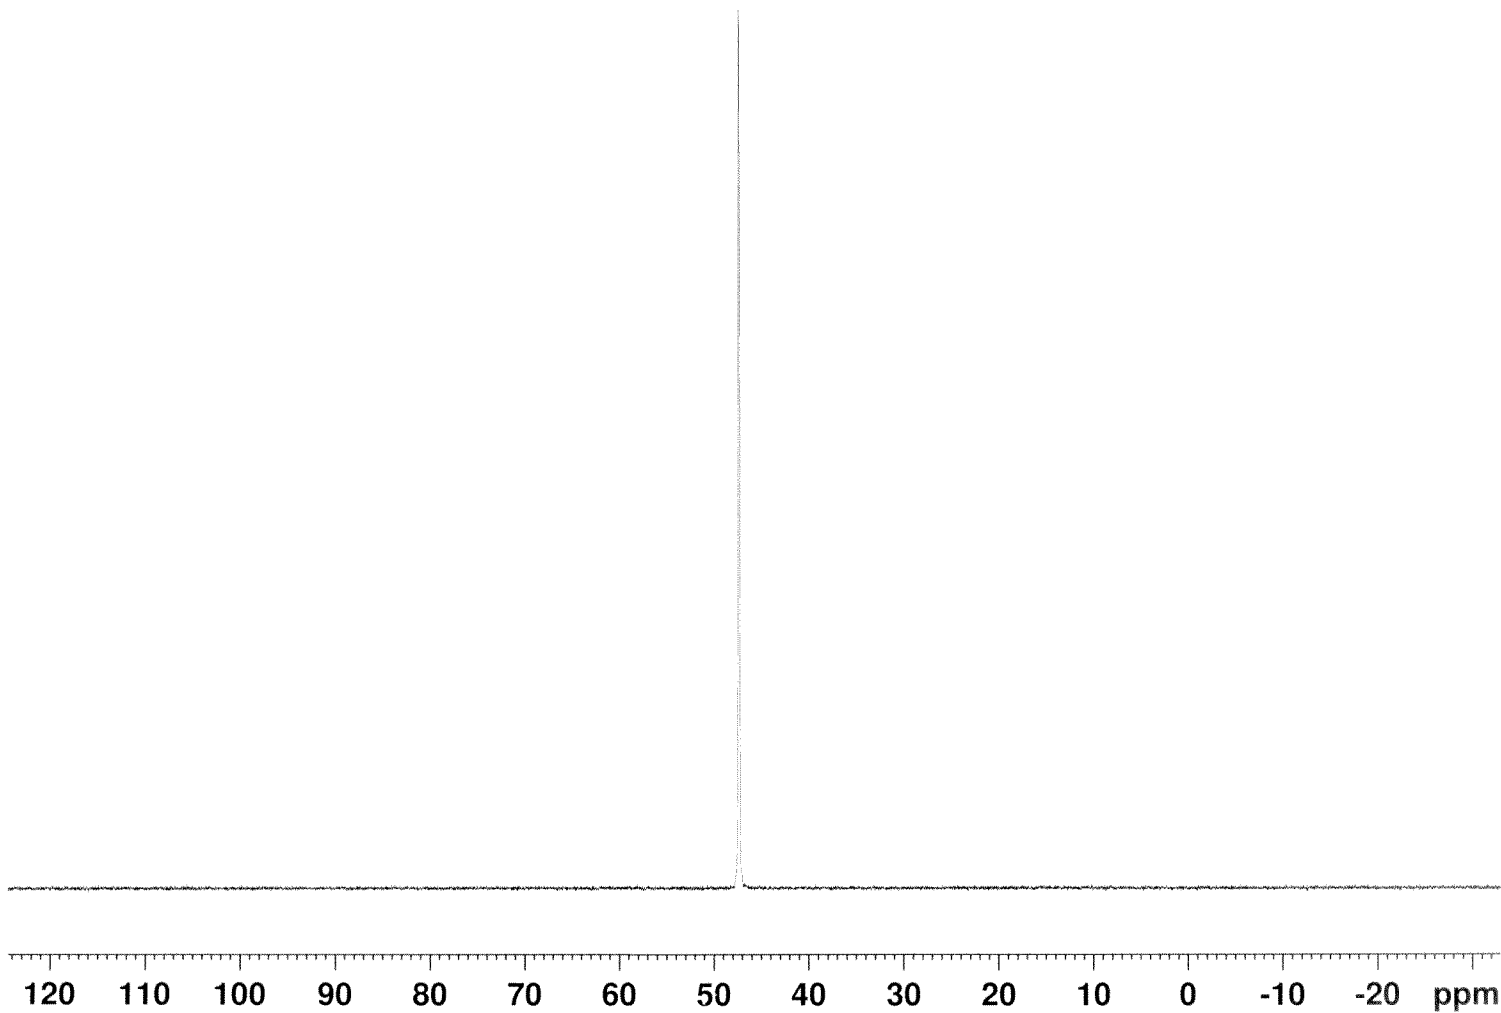

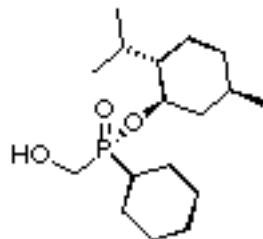

Compound (R<sub>p</sub>)-39  
<sup>1</sup>H NMR

Current Data Parameters  
 NAME OB 2148 4th crystallization  
 EXPNO 3  
 PROCNO 1

F2 - Acquisition Parameters  
 Date\_ 20150902  
 Time 17.40  
 INSTRUM spect  
 PROBHD 5 mm PABBO BB/  
 PULPROG zg30  
 TD 65536  
 SOLVENT CDCl3  
 NS 14  
 DS 2  
 SWH 8012.820 Hz  
 FIDRES 0.122266 Hz  
 AQ 4.0894465 sec  
 RG 32.38  
 DW 62.400 usec  
 DE 6.50 usec  
 TE 294.6 K  
 D1 1.00000000 sec  
 TD0 1

===== CHANNEL f1 =====  
 SFO1 400.1324710 MHz  
 NUC1 1H  
 P1 10.00 usec  
 PLW1 25.00300026 W

F2 - Processing parameters  
 SI 65536  
 SF 400.1300000 MHz  
 WDW EM  
 SSB 0  
 LB 0.30 Hz  
 GB 0  
 PC 1.00

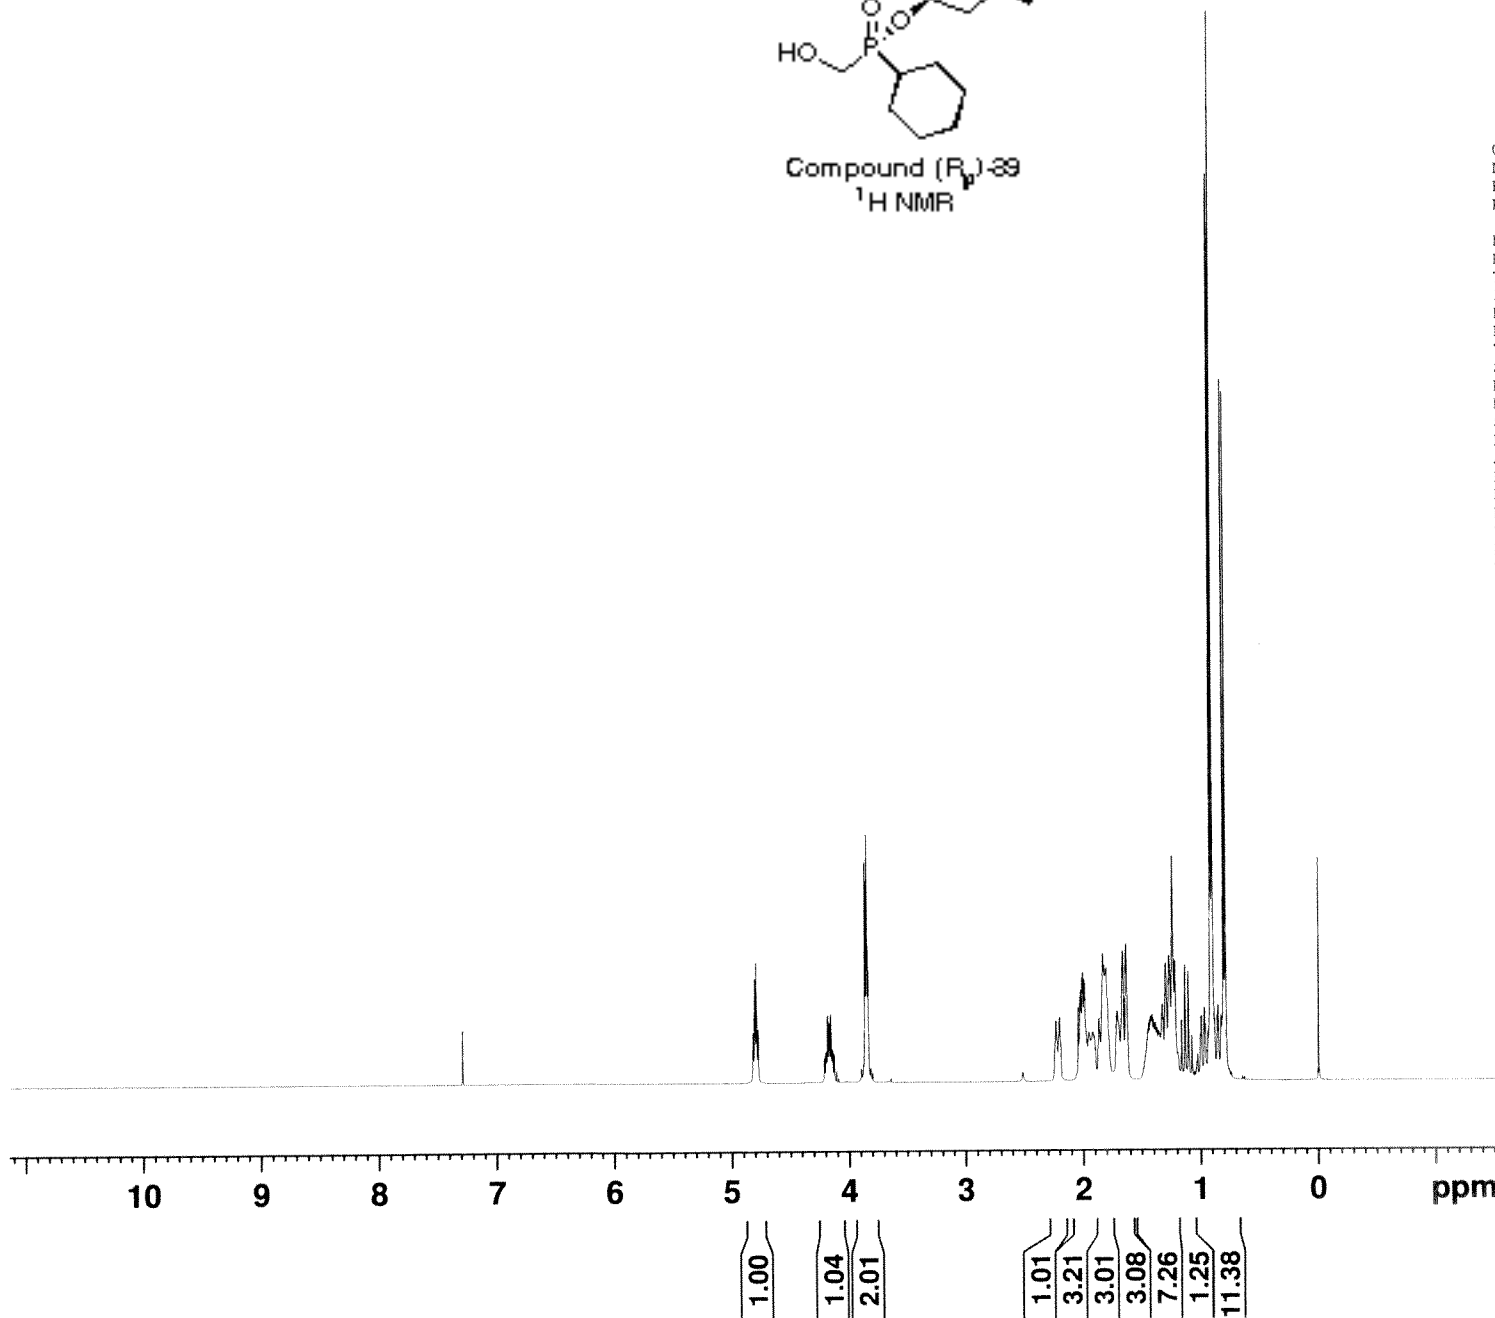

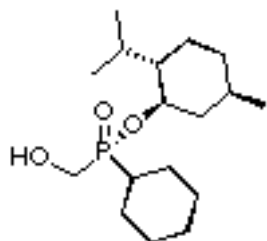

Compound (R<sub>p</sub>)-39  
<sup>13</sup>C NMR

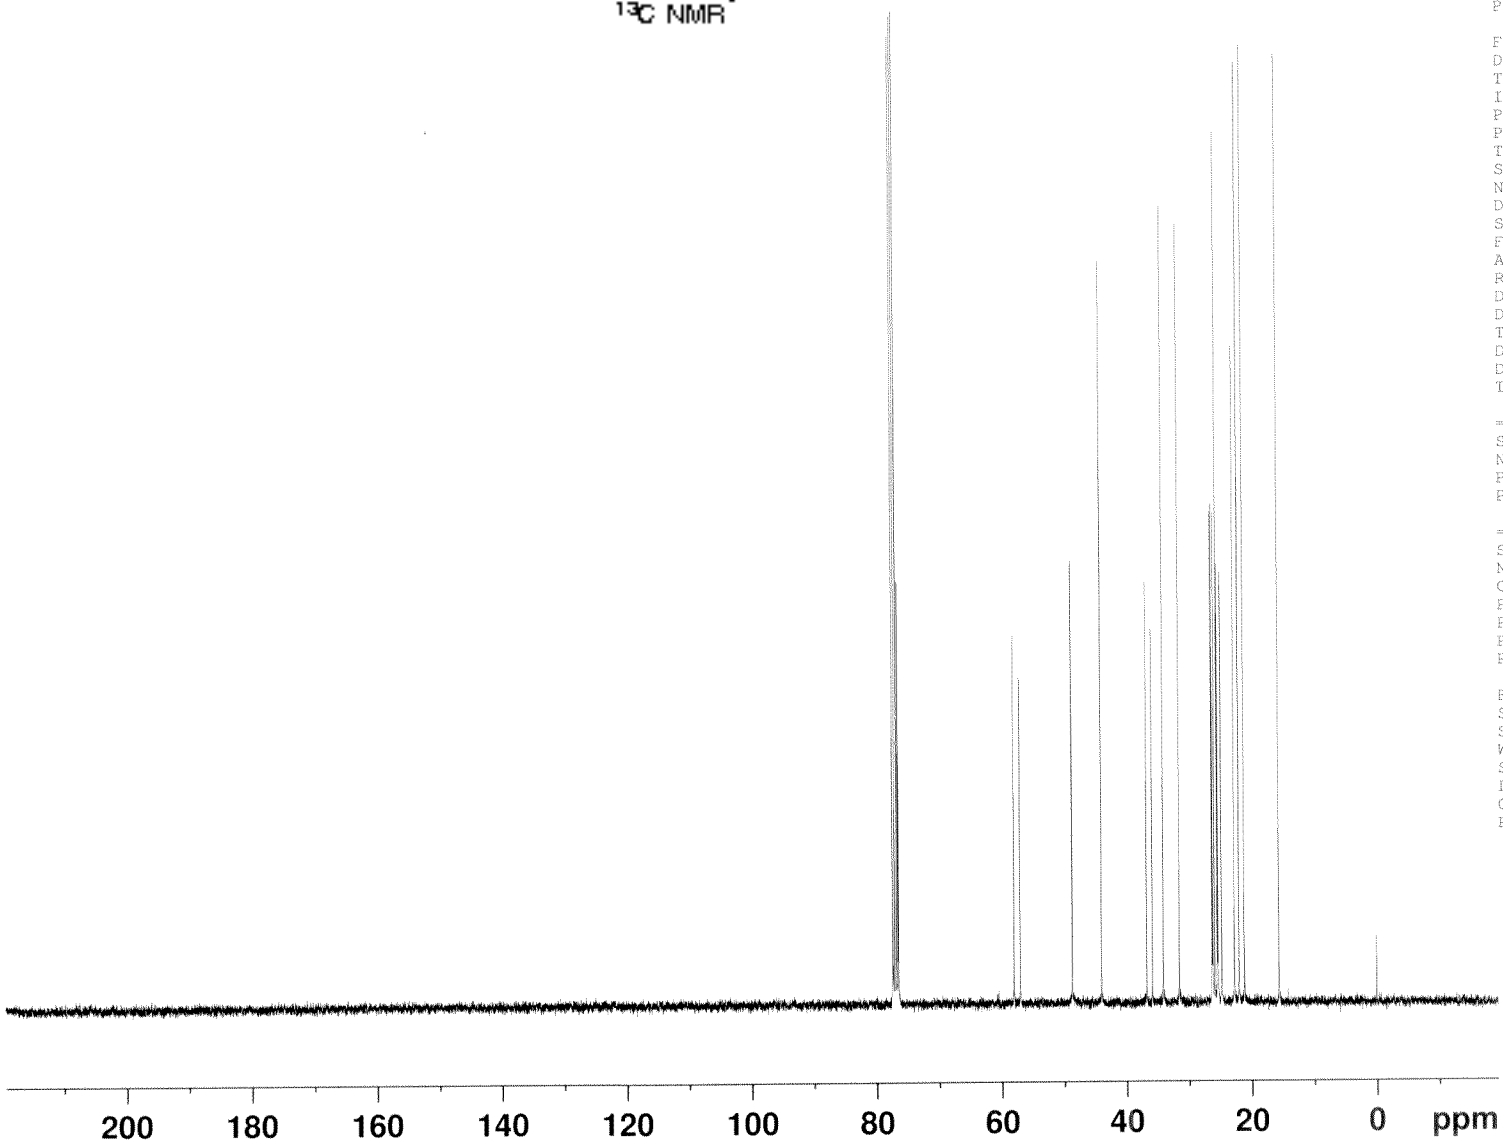

Current Data Parameters  
 NAME OB 2148 4th crystallization  
 EXPNO 4  
 PROCNO 1

F2 - Acquisition Parameters  
 Date\_ 20150903  
 Time 17.00  
 INSTRUM spect  
 PROBHD 5 mm PABBO BB/  
 PULPROG zgpg30  
 TD 65536  
 SOLVENT CDCl3  
 NS 442  
 DS 4  
 SWH 24038.461 Hz  
 FIDRES 0.366798 Hz  
 AQ 1.3631488 sec  
 RG 203.57  
 DW 20.800 usec  
 DE 6.50 usec  
 TE 295.6 K  
 D1 2.00000000 sec  
 D11 0.03000000 sec  
 TD0 1

==== CHANNEL f1 =====  
 SFO1 100.6228293 MHz  
 NUC1 13C  
 P1 10.00 usec  
 PLW1 45.00000000 W

==== CHANNEL F2 =====  
 SFO2 400.1316005 MHz  
 NUC2 1H  
 CPDPRG[2] waltz16  
 PCPD2 90.00 usec  
 PLW2 10.00000000 W  
 PLW12 0.31604999 W  
 PLW13 0.25600001 W

F2 - Processing parameters  
 SI 32768  
 SF 100.6127685 MHz  
 WDW EM  
 SSB 0  
 LB 1.00 Hz  
 GB 0  
 PC 1.40

1055  
OB 1055f1

exp1 Phosphorus

| SAMPLE              |               | SPECIAL |          |
|---------------------|---------------|---------|----------|
| date                | Apr 9 2013    | temp    | not used |
| solvent             | cdcl3         | gain    | 8        |
| file                | /home/TCUser~ | spin    | 20       |
| /vnmrsw/data/auto~  |               | hst     | 0.008    |
| _2013.04.06/s_2013~ |               | pw90    | 18.300   |
| 0409_41/data/Cdc13~ |               | alfa    | 10.000   |
| _04.fid             |               | FLAGS   |          |
| ACQUISITION         |               | FLAGS   |          |
| sw                  | 15797.8       | il      | n        |
| at                  | 1.600         | in      | n        |
| np                  | 50552         | dp      | y        |
| fb                  | 8800          | hs      | ny       |
| PROCESSING          |               | lb      | 1.00     |
| bs                  | 64            | fn      | not used |
| d1                  | 1.000         | DISPLAY |          |
| nt                  | 32            | sp      | -3647.3  |
| ct                  | 32            | wp      | 15797.3  |
| TRANSMITTER         |               | rfl     | 3647.8   |
| tn                  | P31           | rfp     | 0        |
| sfrq                | 121.465       | rp      | -96.9    |
| tof                 | 7421.1        | lp      | -495.4   |
| tpwr                | 55            | PLOT    |          |
| pw                  | 9.150         | wc      | 250      |
| DECOUPLER           |               | sc      | 0        |
| dn                  | H1            | vs      | 33       |
| dof                 | 0             | th      | 11       |
| dm                  | yyy           | ai      | cdc ph   |
| dmm                 | w             |         |          |
| dpwr                | 35            |         |          |
| dmf                 | 6700          |         |          |

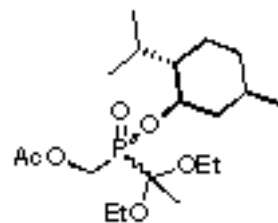

Compound 40  
<sup>31</sup>P/<sup>1</sup>H NMR decoupled

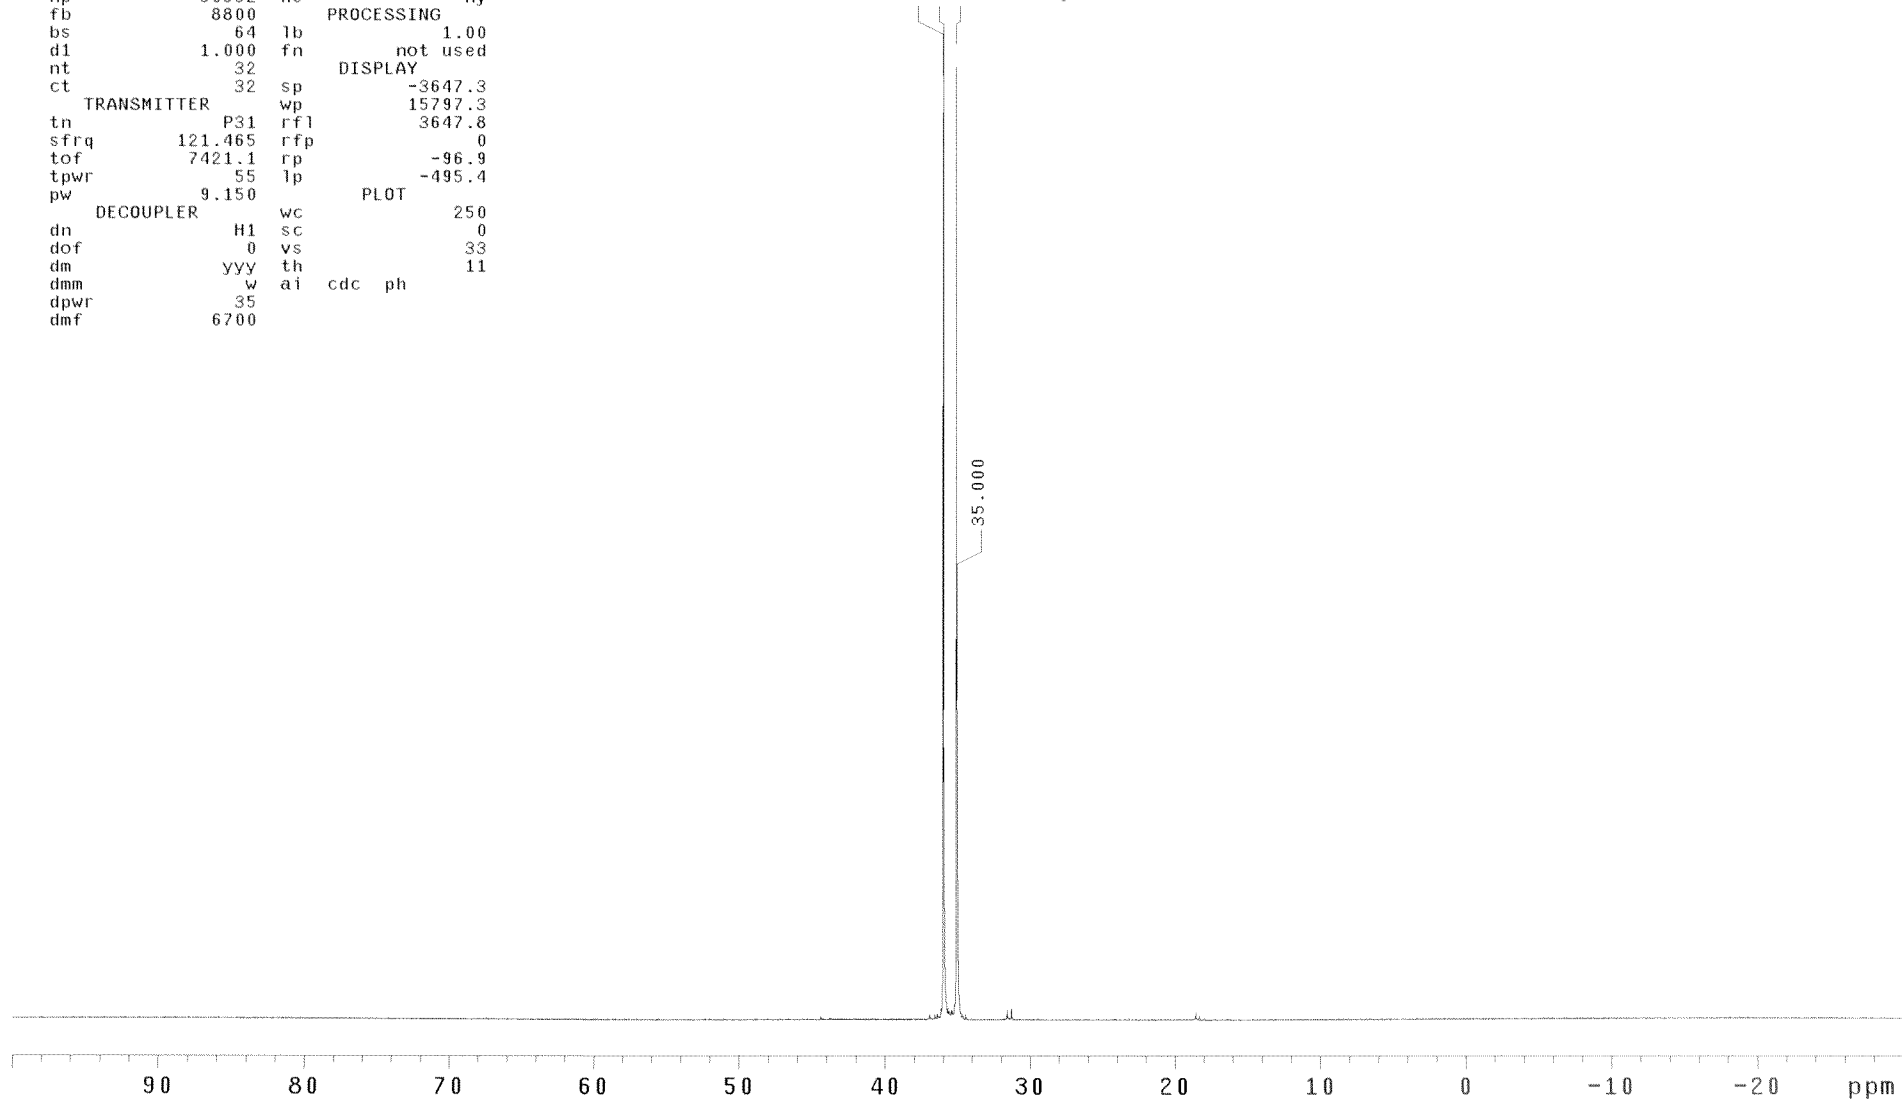

08 1055

exp1 Phosphorus

```
SAMPLE          SPECIAL
date   Apr 9 2013  temp   not used
solvent cdc13      gain    25
file   /home/TCUuser~ spin    20
/vnmrsys/data/auto~ hst     0.008
_2013.04.06/s_2013~ pw90   18.300
0409_22/data/cdc13~ alfa   10.000
          _02.fid      FLAGS
ACQUISITION  il        n
sw          15797.8   in        n
at          1.600    dp         y
np          50552    hs         ny
fb          8800
bs          64      lb         1.00
d1          1.000   fn         not used
nt          64      DISPLAY
ct          64      sp         -3647.3
TRANSMITTER  wp         15797.3
tn          P31      rf1       3647.8
sfrq       121.465  rfp        0
tof        7421.1  rp         27.0
tpwr       55      lp         -113.7
pw          9.150   PLOT
DECOUPLER   wc         250
dn          H1      sc         0
dof         0      vs         344
dm          ynn    th         7
dmm         w      ai        cdc ph
dpwr       35
dmf        6700
```

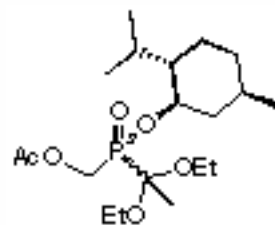

Compound 40  
<sup>31</sup>P/<sup>1</sup>H NMR coupled

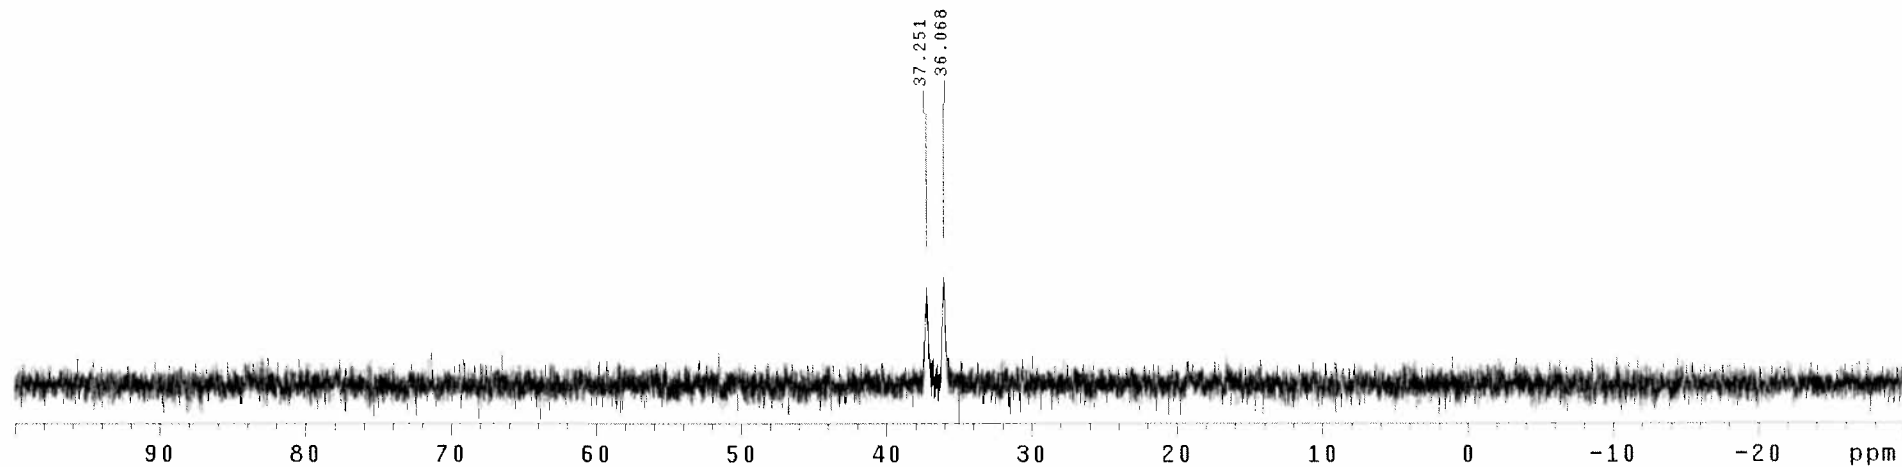

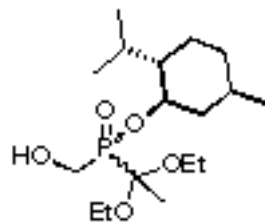

Compound 41  
<sup>31</sup>P/<sup>1</sup>H NMR decoupled

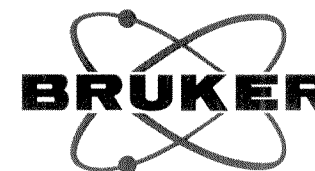

Current Data Parameters  
 NAME OB 1592  
 EXPNO 1  
 PROCNO 1

F2 - Acquisition Parameters  
 Date\_ 20140722  
 Time\_ 9.33  
 INSTRUM spect  
 PROBHD 5 mm PABBO BB/  
 PULPROG zgpg30  
 TD 65536  
 SOLVENT Acetone  
 NS 16  
 DS 4  
 SWH 64102.563 Hz  
 FIDRES 0.978127 Hz  
 AQ 0.5111808 sec  
 RG 203.57  
 DW 7.800 usec  
 DE 6.50 usec  
 TE 295.5 K  
 D1 2.0000000 sec  
 D11 0.0300000 sec  
 TDO 1

==== CHANNEL f1 =====  
 SFO1 161.9674942 MHz  
 NUC1 31P  
 P1 14.25 usec  
 PLW1 15.0000000 W

==== CHANNEL f2 =====  
 SFO2 400.1316005 MHz  
 NUC2 1H  
 CPDPRG[2] waltz16  
 PCPD2 90.00 usec  
 PLW2 10.0000000 W  
 PLW12 0.31604999 W  
 PLW13 0.25600001 W

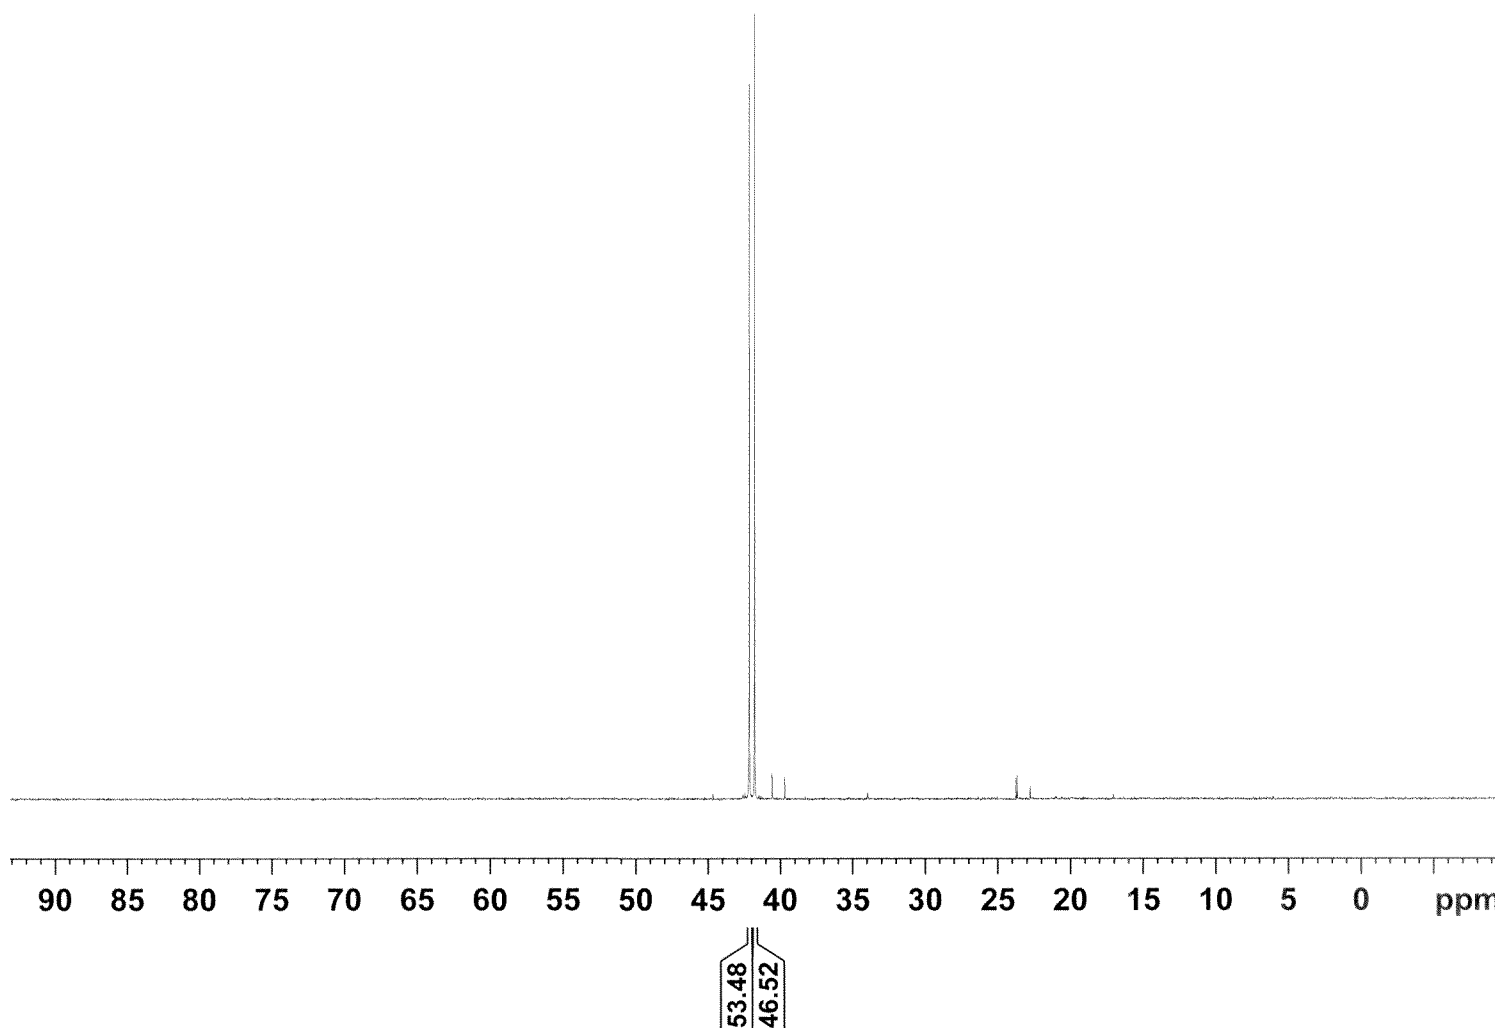

F2 - Processing parameters  
 SI 32768  
 SF 161.9755930 MHz  
 WDW EM  
 SSB 0  
 LB 1.00 Hz  
 GB 0  
 PC 1.40

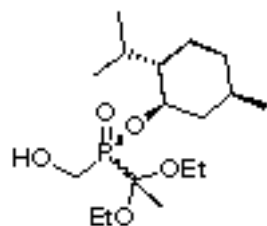

Compound 41  
<sup>31</sup>P/<sup>1</sup>H NMR coupled

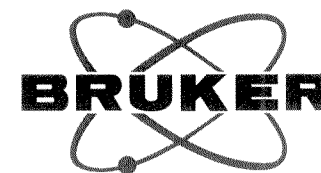

Current Data Parameters  
 NAME OB 1592  
 EXPNO 2  
 PROCNO 1

F2 - Acquisition Parameters  
 Date\_ 20140722  
 Time\_ 9.35  
 INSTRUM spect  
 PROBHD 5 mm PABBO BB/  
 PULPROG zg30  
 TD 65536  
 SOLVENT Acetone  
 NS 32  
 DS 4  
 SWH 64102.563 Hz  
 FIDRES 0.978127 Hz  
 AQ 0.5111808 sec  
 RG 203.57  
 DW 7.800 usec  
 DE 6.50 usec  
 TE 295.2 K  
 D1 2.00000000 sec  
 TD0 1

==== CHANNEL f1 =====  
 SFO1 161.9674942 MHz  
 NUC1 31P  
 P1 14.25 usec  
 PLW1 15.00000000 W

F2 - Processing parameters  
 SI 32768  
 SF 161.9755930 MHz  
 WDW EM  
 SSB 0  
 LB 1.00 Hz  
 GB 0  
 PC 1.40

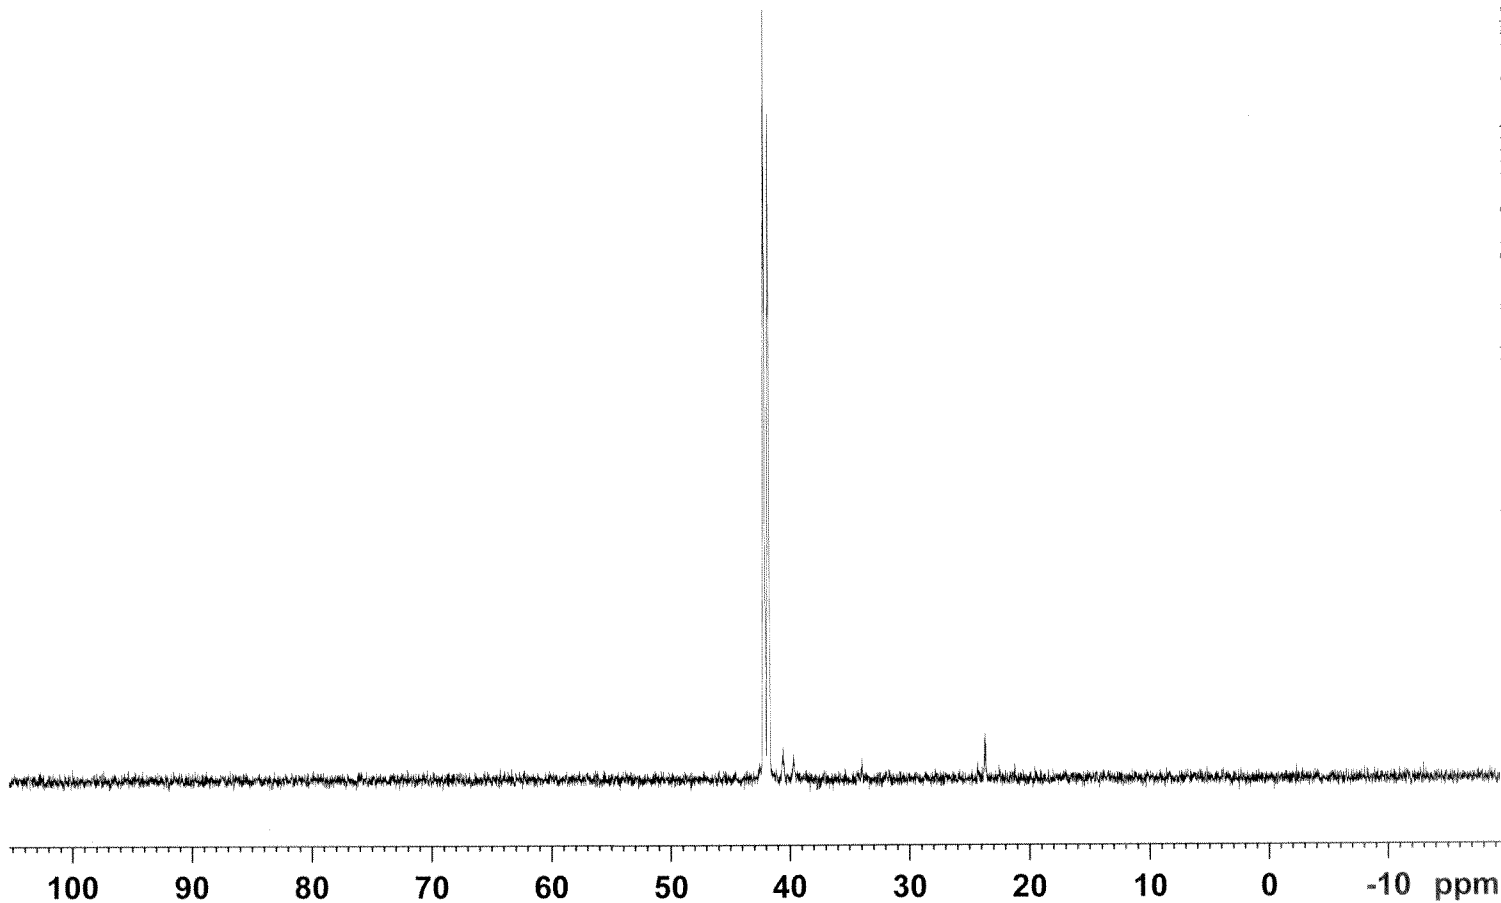



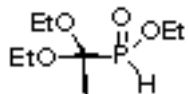

Compound 42  
<sup>31</sup>P/<sup>1</sup>H NMR decoupled

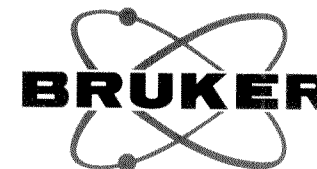

Current Data Parameters  
 NAME OB 1725 after work-up  
 EXPNO 5  
 PROCNO 1

F2 - Acquisition Parameters  
 Date 20140917  
 Time 12.01  
 INSTRUM spect  
 PROBHD 5 mm PABBO BB/  
 PULPROG zgpg30  
 TD 65536  
 SOLVENT CDCl3  
 NS 16  
 DS 4  
 SWH 64102.563 Hz  
 FIDRES 0.978127 Hz  
 AQ 0.5111808 sec  
 RG 203.57  
 DW 7.800 usec  
 DE 6.50 usec  
 TE 296.0 K  
 D1 2.00000000 sec  
 D11 0.03000000 sec  
 TD0 1

==== CHANNEL f1 =====  
 SFO1 161.9836917 MHz  
 NUC1 31P  
 P1 14.25 usec  
 PLW1 15.00000000 W

==== CHANNEL f2 =====  
 SFO2 400.1316005 MHz  
 NUC2 1H  
 CPDPRG[2] waltz16  
 PCPD2 90.00 usec  
 PLW2 10.00000000 W  
 PLW12 0.31604999 W  
 PLW13 0.25600001 W

F2 - Processing parameters  
 SI 32768  
 SF 161.9755930 MHz  
 WDW EM  
 SSB 0  
 LB 1.00 Hz  
 GB 0  
 PC 1.40

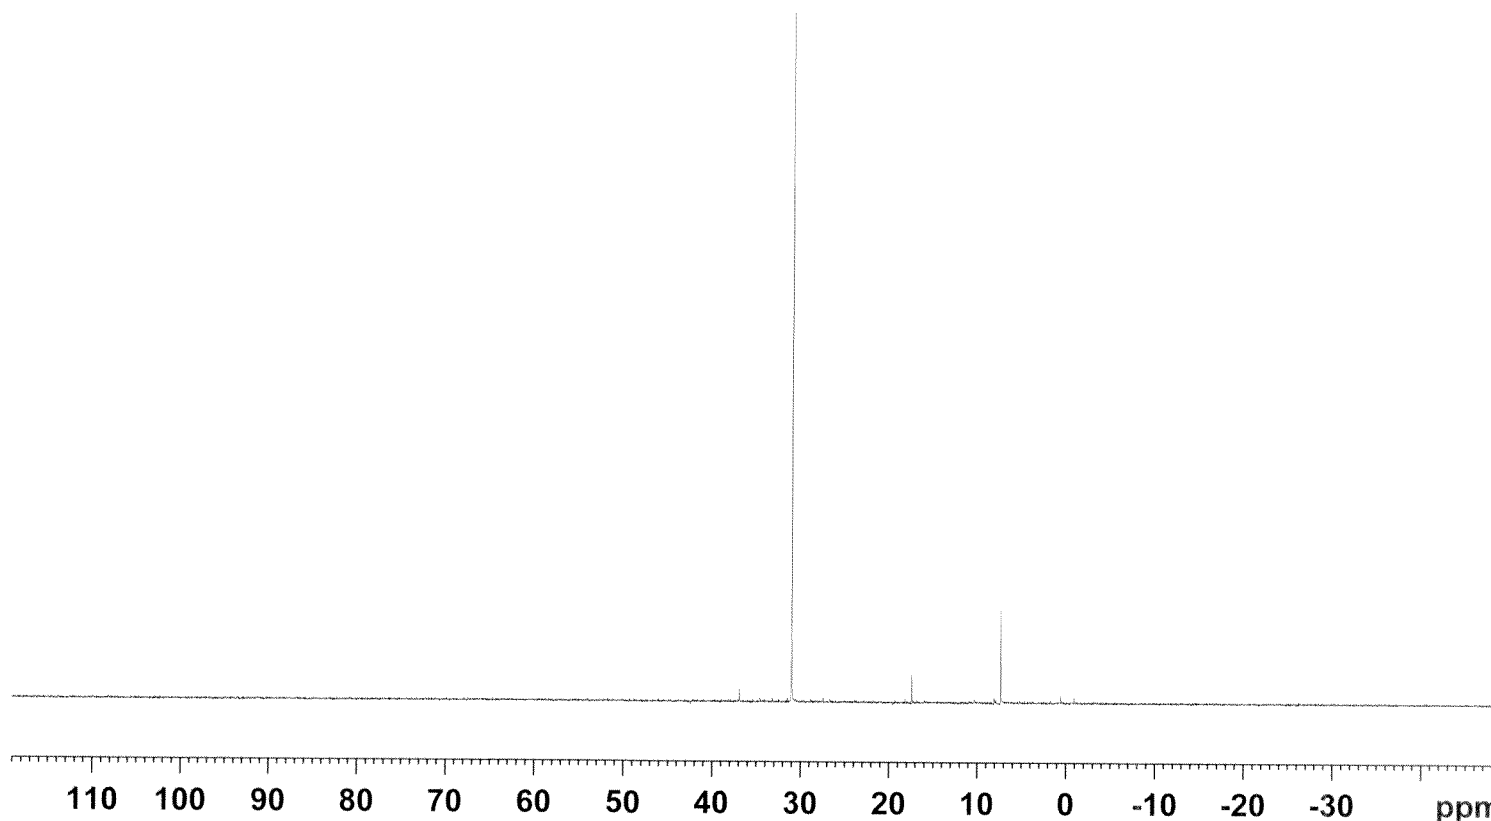

84.25  
 3.08  
 12.67

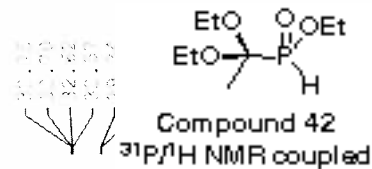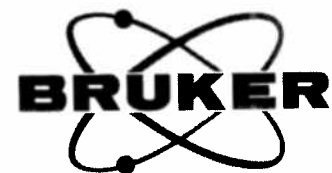

Current Data Parameters  
 NAME OB 1725 after work-up  
 EXPNO 2  
 PROCNO 1

F2 - Acquisition Parameters  
 Date\_ 20140917  
 Time 12.02  
 INSTRUM spect  
 PROBHD 5 mm PABBO BB/  
 PULPROG zg30  
 TD 65536  
 SOLVENT CDCl3  
 NS 13  
 DS 4  
 SWH 64102.563 Hz  
 FIDRES 0.978127 Hz  
 AQ 0.5111808 sec  
 RG 203.57  
 DW 7.800 usec  
 DE 6.50 usec  
 TE 295.7 K  
 D1 2.0000000 sec  
 TDO 1

===== CHANNEL f1 =====  
 SF01 161.9674942 MHz  
 NUC1 31P  
 P1 14.25 usec  
 PLW1 15.0000000 W

F2 - Processing parameters  
 SI 32768  
 SF 161.9755930 MHz  
 WDW EM  
 SSB 0  
 LB 1.00 Hz  
 GB 0  
 PC 1.40

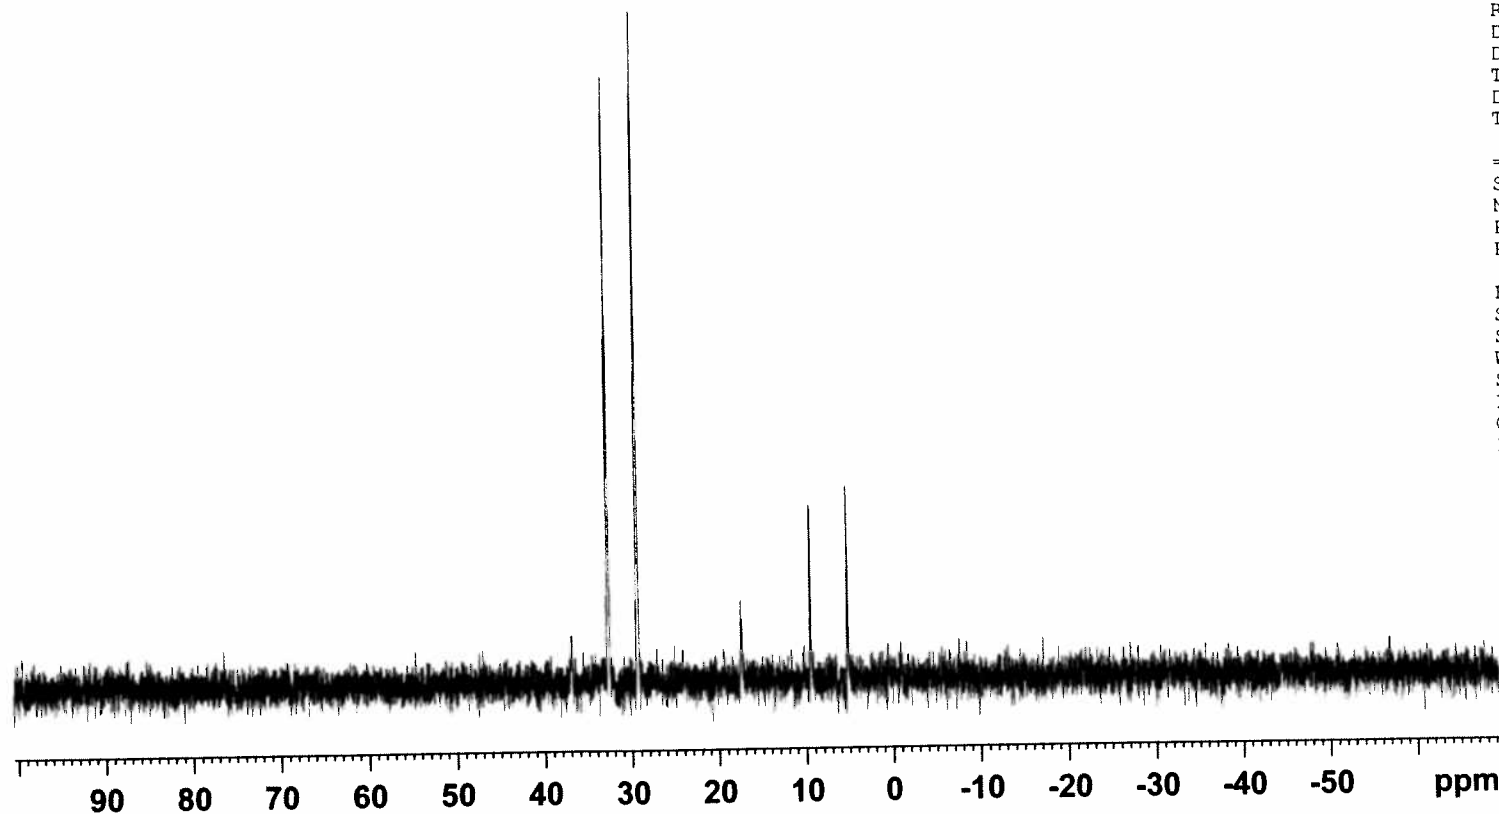

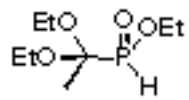

Compound 42  
<sup>1</sup>H NMR

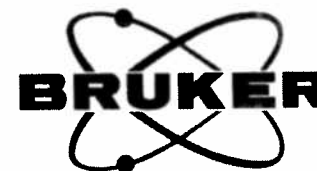

Current Data Parameters  
 NAME OB 1725 after work-up  
 EXPNO 3  
 PROCNO 1

F2 - Acquisition Parameters  
 Date\_ 20140917  
 Time\_ 12.05  
 INSTRUM spect  
 PROBHD 5 mm PABBO BB/  
 PULPROG zg30  
 TD 65536  
 SOLVENT CDCl3  
 NS 8  
 DS 2  
 SWH 8012.820 Hz  
 FIDRES 0.122266 Hz  
 AQ 4.0894465 sec  
 RG 113.32  
 DW 62.400 usec  
 DE 6.50 usec  
 TE 295.7 K  
 D1 1.00000000 sec  
 TD0 1

===== CHANNEL f1 =====  
 SF01 400.1324710 MHz  
 NUC1 1H  
 P1 10.00 usec  
 PLW1 25.00300026 W

F2 - Processing parameters  
 SI 65536  
 SF 400.1300000 MHz  
 WDW EM  
 SSB 0  
 LB 0.30 Hz  
 GB 0  
 PC 1.00

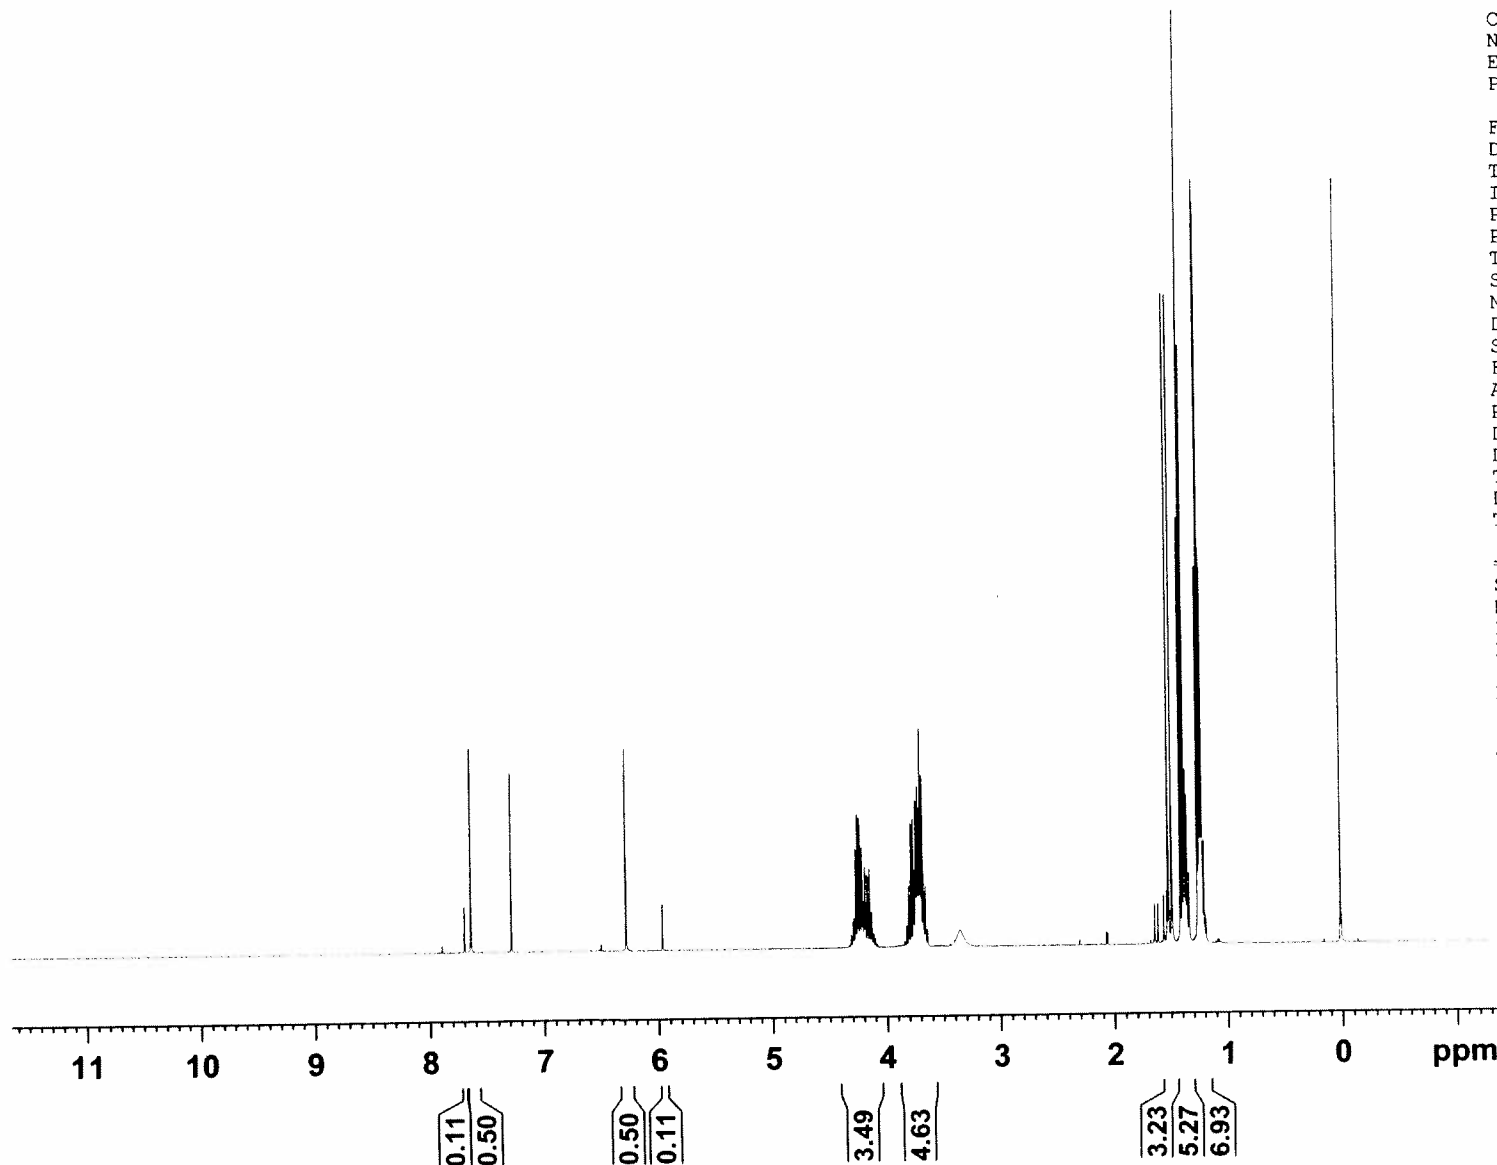

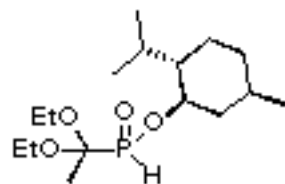

Compound 43  
<sup>31</sup>P/<sup>1</sup>H NMR decoupled

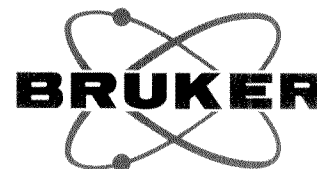

Current Data Parameters  
 NAME OB 1701f2  
 EXPNO 1  
 PROCNO 1

F2 - Acquisition Parameters  
 Date\_ 20140910  
 Time\_ 9.04  
 INSTRUM spect  
 PROBHD 5 mm PABBO BB/  
 PULPROG zgpg30  
 TD 65536  
 SOLVENT DMSO  
 NS 16  
 DS 4  
 SWH 64102.563 Hz  
 FIDRES 0.978127 Hz  
 AQ 0.5111808 sec  
 RG 203.57  
 DW 7.800 usec  
 DE 6.50 usec  
 TE 295.6 K  
 D1 2.00000000 sec  
 D11 0.03000000 sec  
 TD0 1

==== CHANNEL f1 =====  
 SFO1 161.9674942 MHz  
 NUC1 31P  
 P1 14.25 usec  
 PLW1 15.00000000 W

==== CHANNEL f2 =====  
 SFO2 400.1316005 MHz  
 NUC2 1H  
 CPDPRG[2] waltz16  
 PCPD2 90.00 usec  
 PLW2 10.00000000 W  
 PLW12 0.31604999 W  
 PLW13 0.25600001 W

F2 - Processing parameters  
 SI 32768  
 SF 161.9755930 MHz  
 WDW EM  
 SSB 0  
 LB 1.00 Hz  
 GB 0  
 PC 1.40

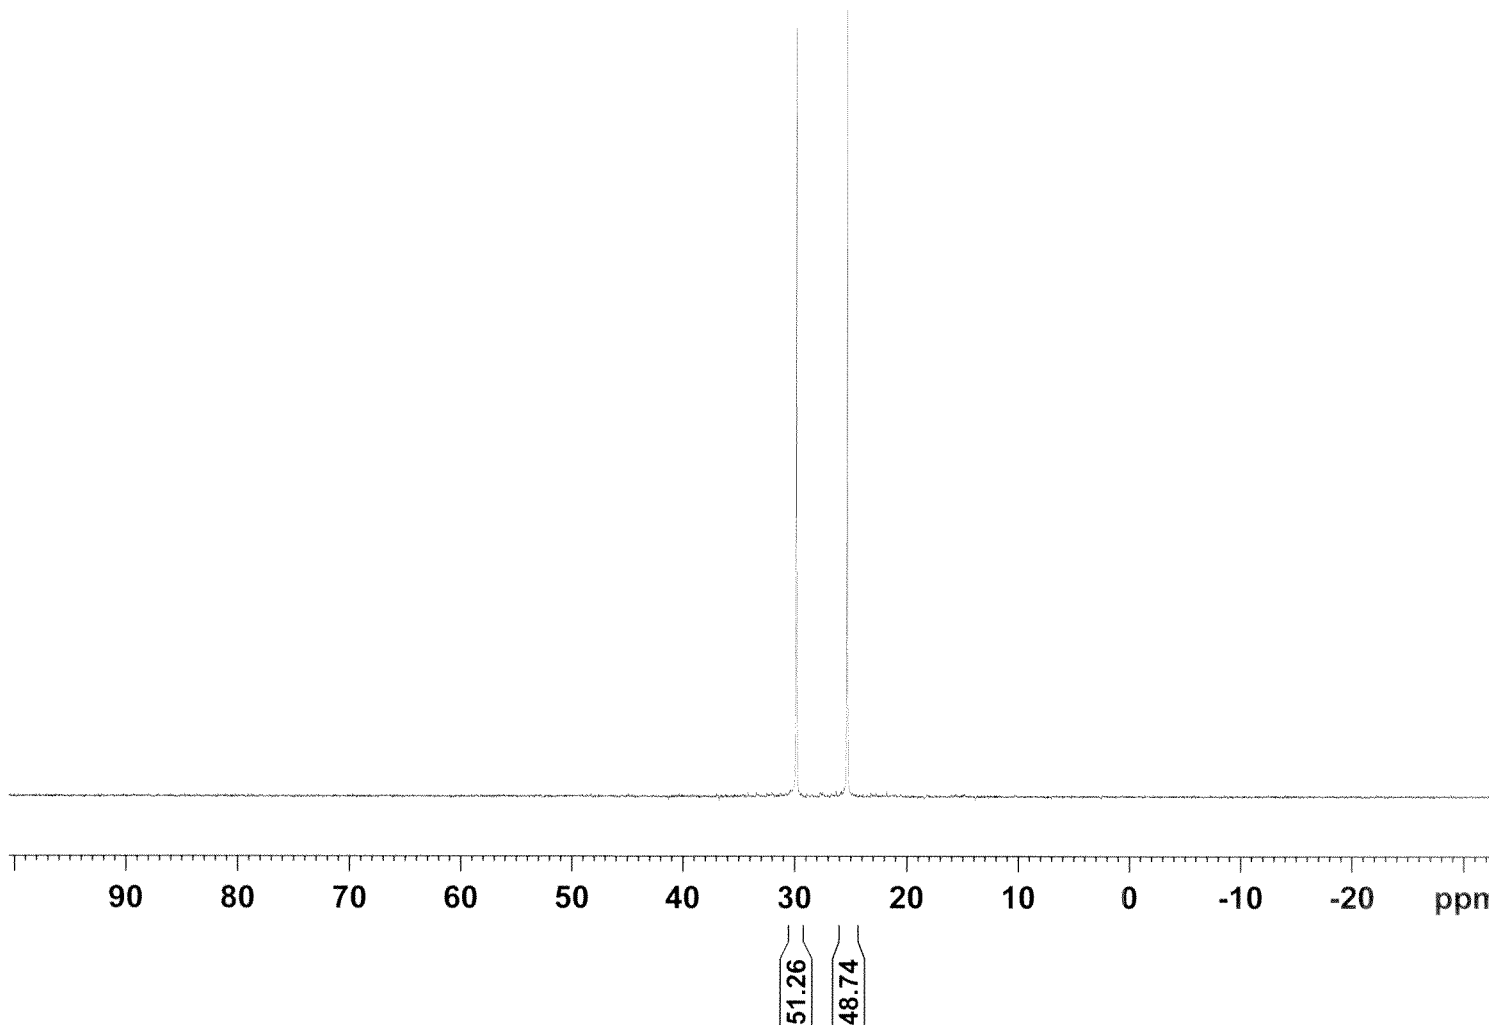

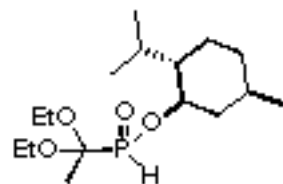

Compound 43  
 $^{31}\text{P}/^1\text{H}$  NMR coupled

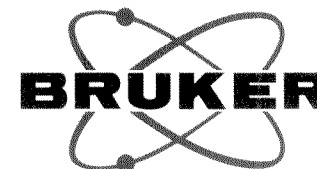

Current Data Parameters  
 NAME OB 1701f2  
 EXPNO 2  
 PROCNO 1

F2 - Acquisition Parameters  
 Date\_ 20140910  
 Time\_ 9.06  
 INSTRUM spect  
 PROBHD 5 mm PABBO BB/  
 PULPROG zg30  
 TD 65536  
 SOLVENT DMSO  
 NS 32  
 DS 4  
 SWH 64102.563 Hz  
 FIDRES 0.978127 Hz  
 AQ 0.5111808 sec  
 RG 203.57  
 DW 7.800 usec  
 DE 6.50 usec  
 TE 295.3 K  
 D1 2.00000000 sec  
 TD0 1

===== CHANNEL f1 =====  
 SFO1 161.9674942 MHz  
 NUC1 31P  
 P1 14.25 usec  
 PLW1 15.00000000 W

F2 - Processing parameters  
 SI 32768  
 SF 161.9755930 MHz  
 WDW EM  
 SSB 0  
 LB 1.00 Hz  
 GB 0  
 PC 1.40

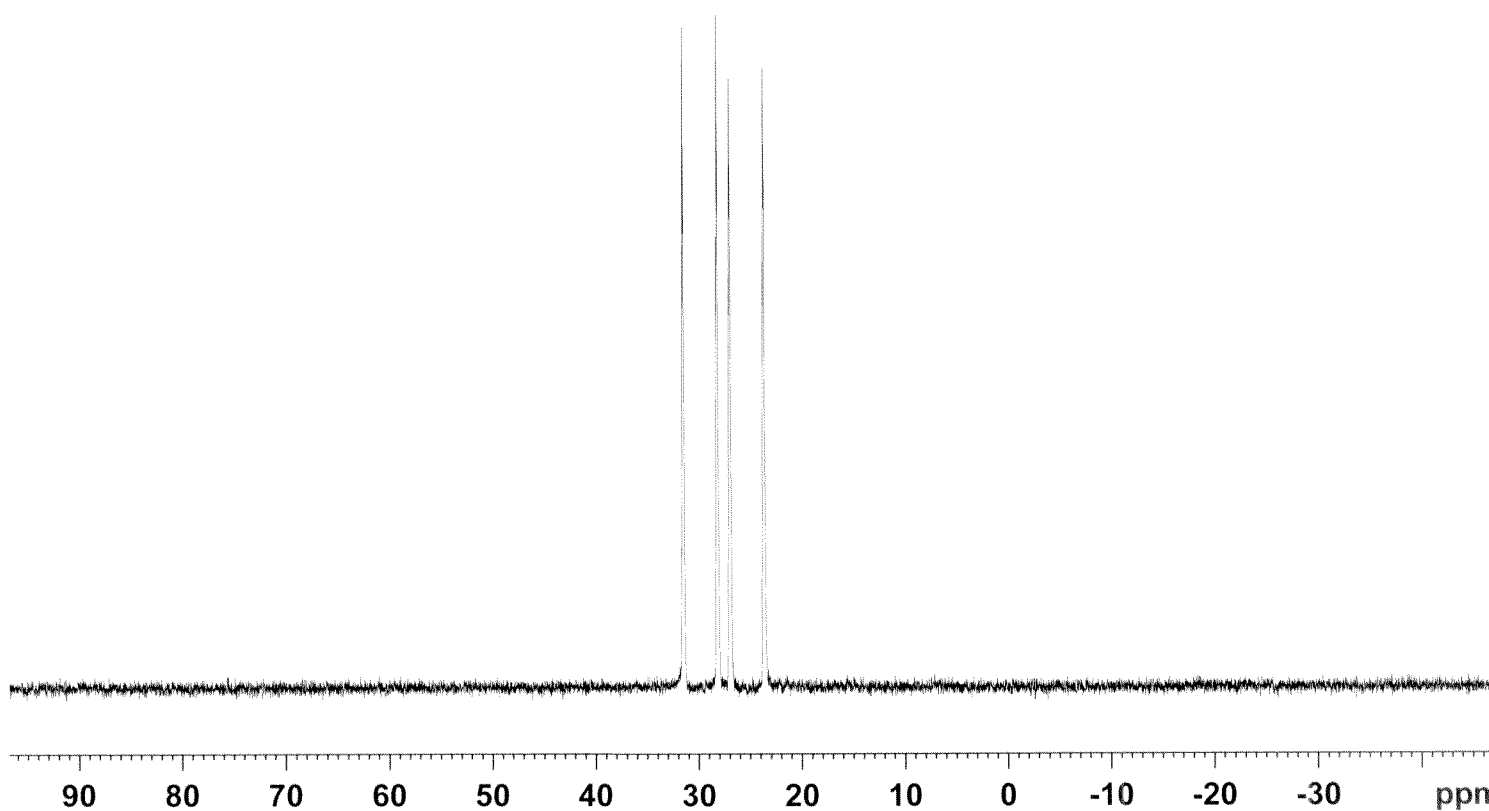

OB 1037

exp1 Phosphorus

| SAMPLE               |                | SPECIAL    |          |
|----------------------|----------------|------------|----------|
| date                 | Mar 26 2013    | temp       | not used |
| solvent              | cdcl3          | gain       | 25       |
| file                 | /home/TCUuser~ | spin       | 20       |
| /vnmr/sys/data/auto~ |                | hst        | 0.008    |
| _2013.03.09/s_2013~  |                | pw90       | 18.300   |
| 0326_36/data/cdc13~  |                | alfa       | 10.000   |
| _01.fid              |                | FLAGS      |          |
| ACQUISITION          |                | il         | n        |
| sw                   | 15797.8        | in         | n        |
| at                   | 1.600          | dp         | y        |
| np                   | 50552          | hs         | ny       |
| fb                   | 8800           | PROCESSING |          |
| bs                   | 64             | lb         | 1.00     |
| d1                   | 1.000          | fn         | not used |
| nt                   | 64             | DISPLAY    |          |
| ct                   | 64             | sp         | -3647.3  |
| TRANSMITTER          |                | wp         | 15797.3  |
| tn                   | P31            | rfl        | 3647.8   |
| sfrq                 | 121.465        | rfp        | 0        |
| tof                  | 7421.1         | rp         | -168.2   |
| tpwr                 | 55             | lp         | -341.1   |
| pw                   | 9.150          | PLOT       |          |
| DECOUPLER            |                | wc         | 250      |
| dn                   | H1             | sc         | 0        |
| dof                  | 0              | vs         | 62       |
| dm                   | yyy            | th         | 7        |
| dmm                  | w              | ai         | cdc ph   |
| dpwr                 | 35             |            |          |
| dmf                  | 6700           |            |          |

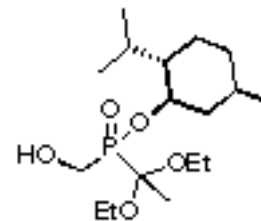

Compound 41  
<sup>31</sup>P/<sup>1</sup>H NMR decoupled

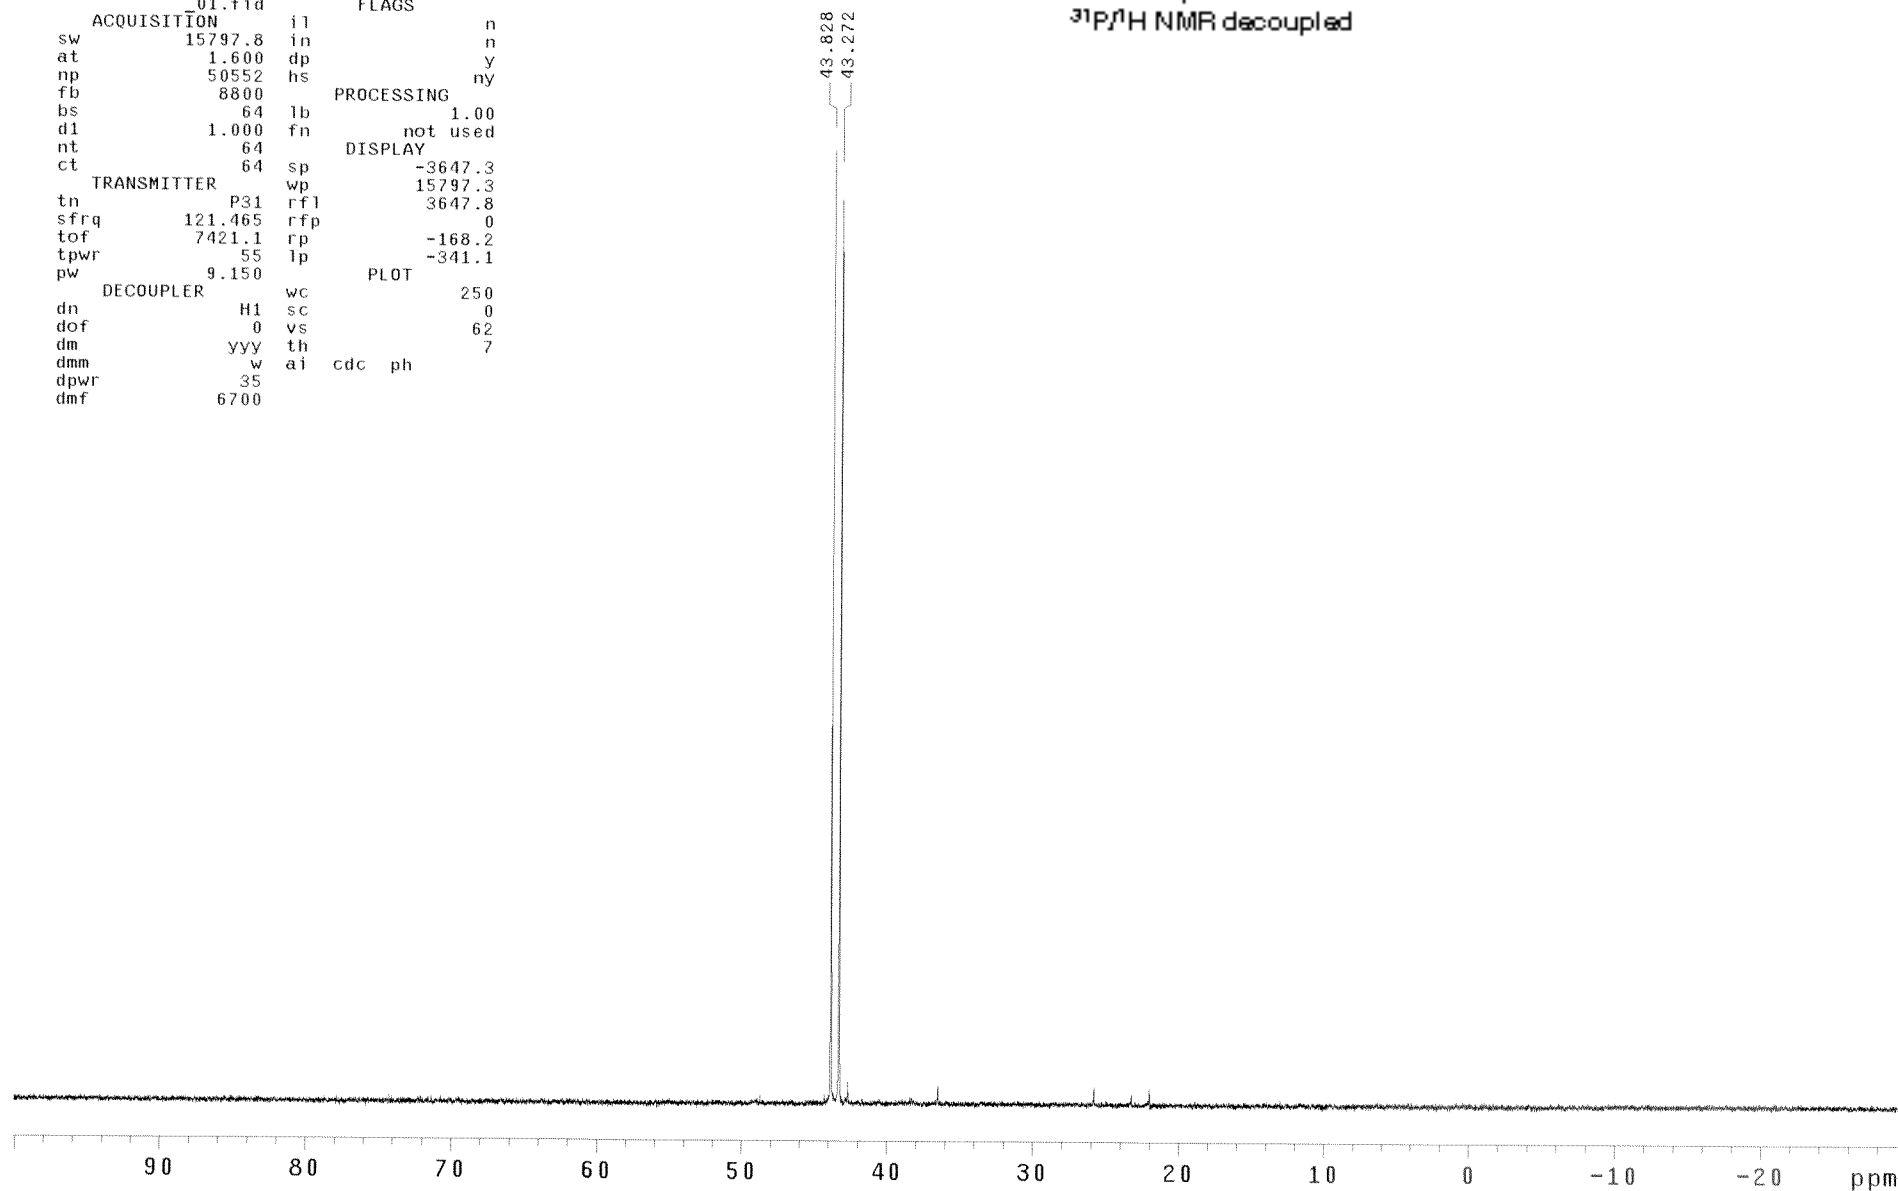

0B 1037

exp1 Phosphorus

|                     |                |            |          |
|---------------------|----------------|------------|----------|
| SAMPLE              |                | SPECIAL    |          |
| date                | Mar 26 2013    | temp       | not used |
| solvent             | cdc13          | gain       | 25       |
| file                | /home/TCUuser~ | spin       | 20       |
| /vnmrsys/data/auto~ |                | hst        | 0.008    |
| _2013.03.09/s_2013~ |                | pw90       | 18.300   |
| 0326_36/data/cdc13~ |                | alfa       | 10.000   |
| _02.fid             |                | FLAGS      |          |
| ACQUISITION         |                | il         | n        |
| sw                  | 15797.8        | in         | n        |
| at                  | 1.600          | dp         | y        |
| np                  | 50552          | hs         | ny       |
| fb                  | 8800           | PROCESSING |          |
| bs                  | 64             | lb         | 1.00     |
| d1                  | 1.000          | fn         | not used |
| nt                  | 64             | DISPLAY    |          |
| ct                  | 64             | sp         | 3185.7   |
| TRANSMITTER         |                | wp         | 4513.5   |
| tn                  | P31            | rfl        | 3647.8   |
| sfrq                | 121.465        | rfp        | 0        |
| tof                 | 7421.1         | rp         | 2.6      |
| tpwr                | 55             | lp         | -113.7   |
| pw                  | 9.150          | PLOT       |          |
| DECOUPLER           |                | wc         | 250      |
| dn                  | H1             | sc         | 0        |
| dof                 | 0              | vs         | 235      |
| dm                  | ynn            | th         | 15       |
| dmm                 | w              | ai         | cdc ph   |
| dpwr                | 35             |            |          |
| dmf                 | 6700           |            |          |

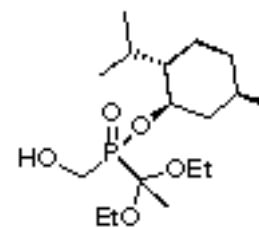

Compound 41  
31P/1H NMR coupled

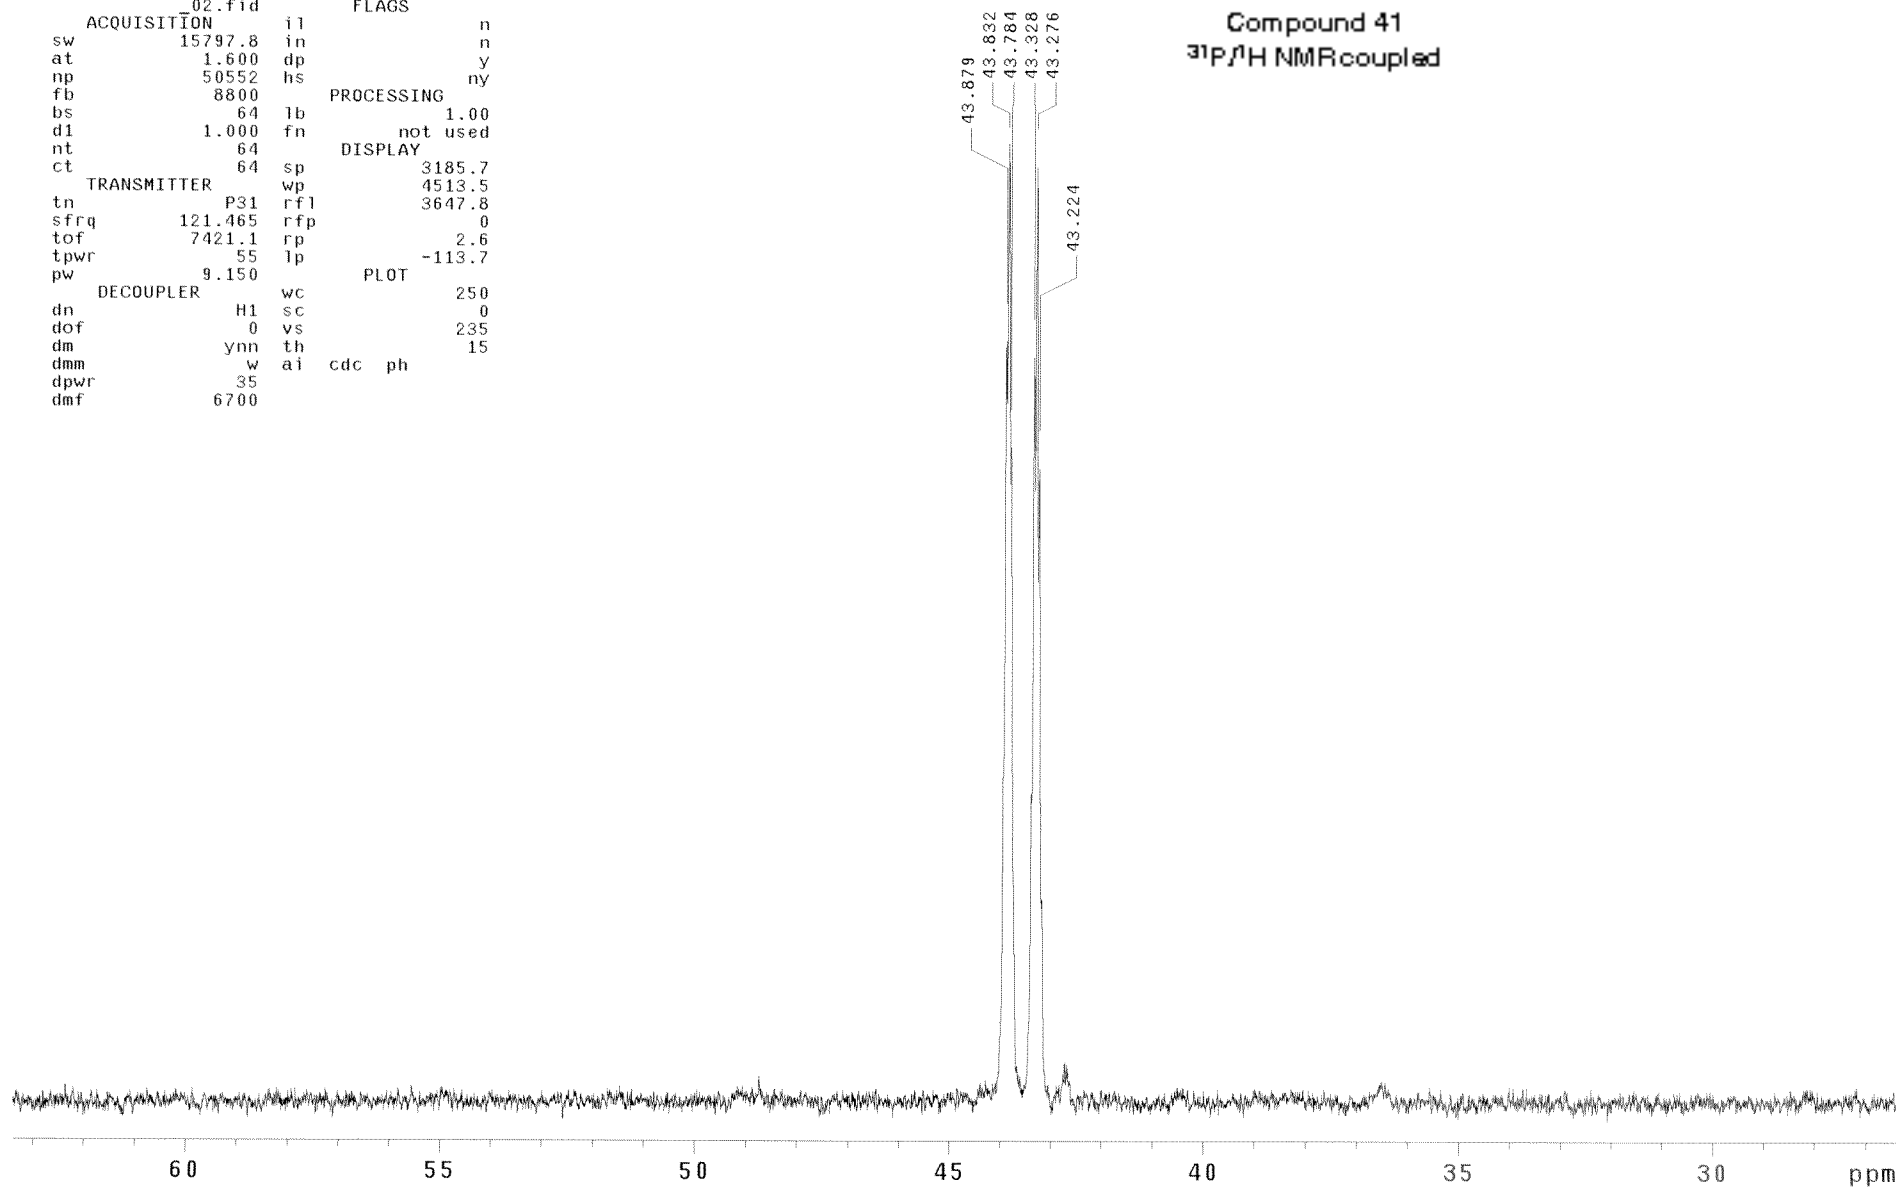

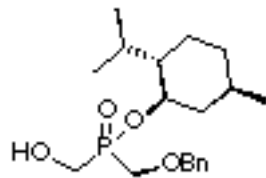

Compound 44  
<sup>31</sup>P/<sup>1</sup>H NMR decoupled

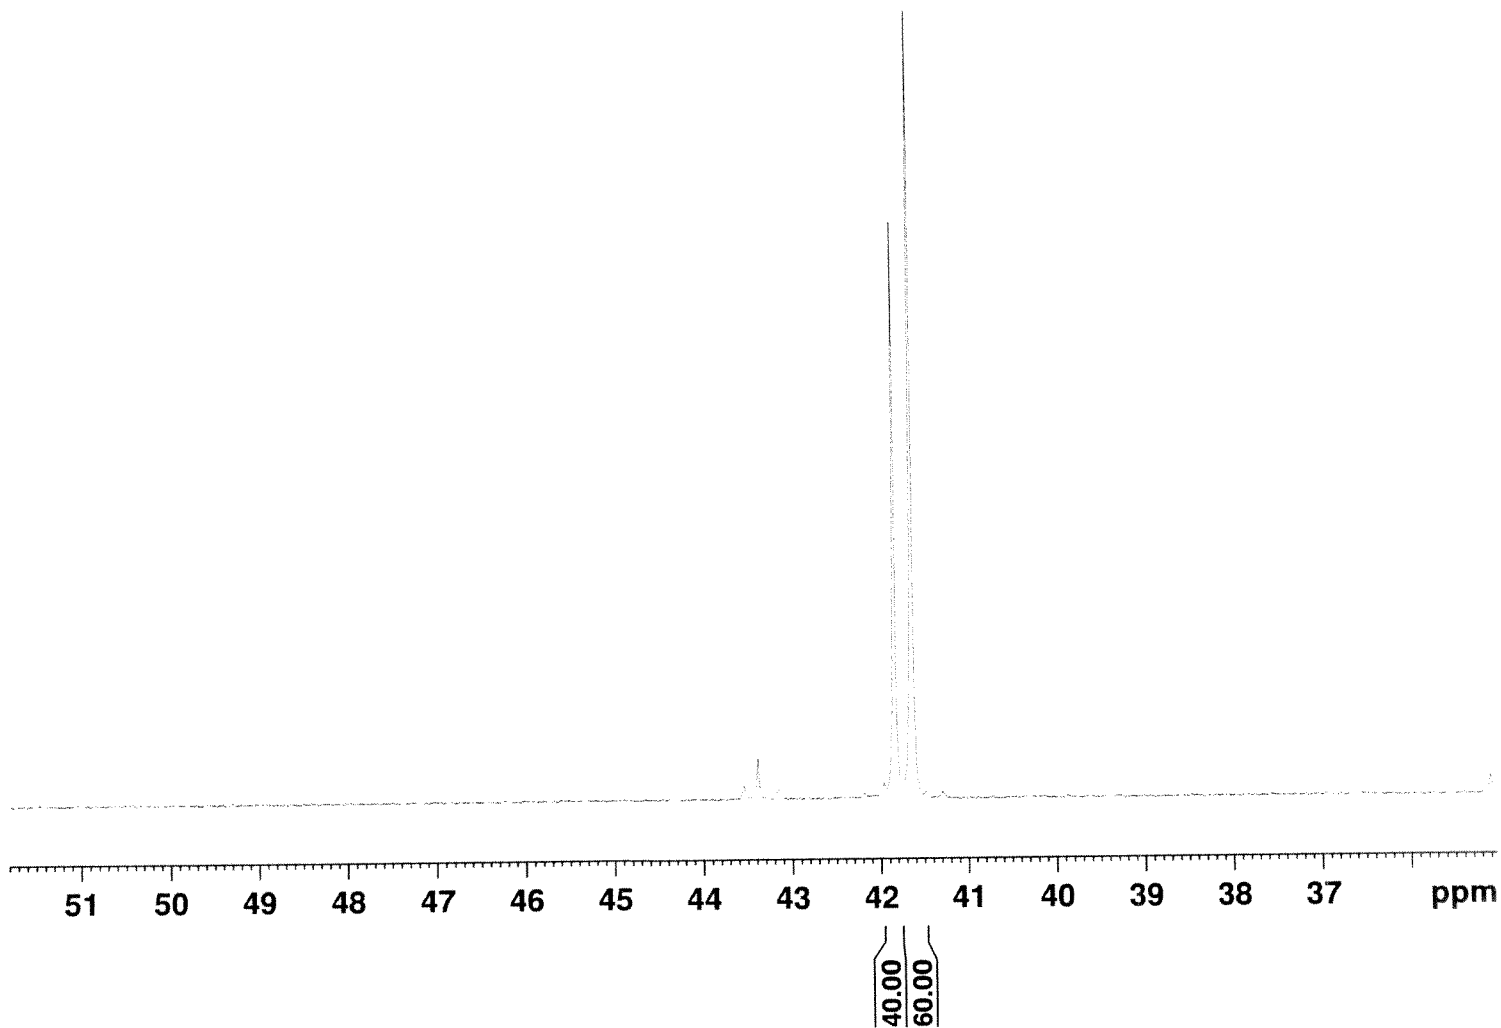

Current Data Parameters  
 NAME OB 2110  
 EXPNO 1  
 PROCNO 1

F2 - Acquisition Parameters  
 Date\_ 20150709  
 Time 9.23  
 INSTRUM spect  
 PROBHD 5 mm PABBO BB/  
 PULPROG zgpg30  
 TD 65536  
 SOLVENT Acetone  
 NS 16  
 DS 4  
 SWH 64102.563 Hz  
 FIDRES 0.978127 Hz  
 AQ 0.5111808 sec  
 RG 203.57  
 DW 7.800 usec  
 DE 6.50 usec  
 TE 294.3 K  
 D1 2.00000000 sec  
 D11 0.03000000 sec  
 TD0 1

==== CHANNEL f1 =====  
 SFO1 161.9674942 MHz  
 NUC1 31P  
 P1 14.25 usec  
 PLW1 15.00000000 W

==== CHANNEL f2 =====  
 SFO2 400.1316005 MHz  
 NUC2 1H  
 CPDPRG[2] waltz16  
 PCPD2 90.00 usec  
 PLW2 10.00000000 W  
 PLW12 0.31604999 W  
 PLW13 0.25600001 W

F2 - Processing parameters  
 SI 32768  
 SF 161.9755930 MHz  
 WDW EM  
 SSB 0  
 LB 1.00 Hz  
 GB 0  
 PC 1.40



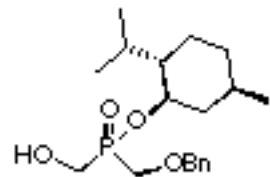

Compound 44  
<sup>31</sup>P/<sup>1</sup>H NMR coupled

Current Data Parameters  
 NAME OB 2110  
 EXPNO 2  
 PROCNO 1

F2 - Acquisition Parameters  
 Date\_ 20150709  
 Time 9.25  
 INSTRUM spect  
 PROBHD 5 mm PABBO BB/  
 PULPROG zg30  
 TD 65536  
 SOLVENT Acetone  
 NS 32  
 DS 4  
 SWH 64102.563 Hz  
 FIDRES 0.978127 Hz  
 AQ 0.5111808 sec  
 RG 203.57  
 DW 7.800 usec  
 DE 6.50 usec  
 TE 293.9 K  
 D1 2.00000000 sec  
 TD0 1

==== CHANNEL f1 =====  
 SF01 161.9674942 MHz  
 NUC1 31P  
 P1 14.25 usec  
 PLW1 15.00000000 W

F2 - Processing parameters  
 SI 32768  
 SF 161.9755930 MHz  
 WDW EM  
 SSB 0  
 LB 1.00 Hz  
 GB 0  
 PC 1.40

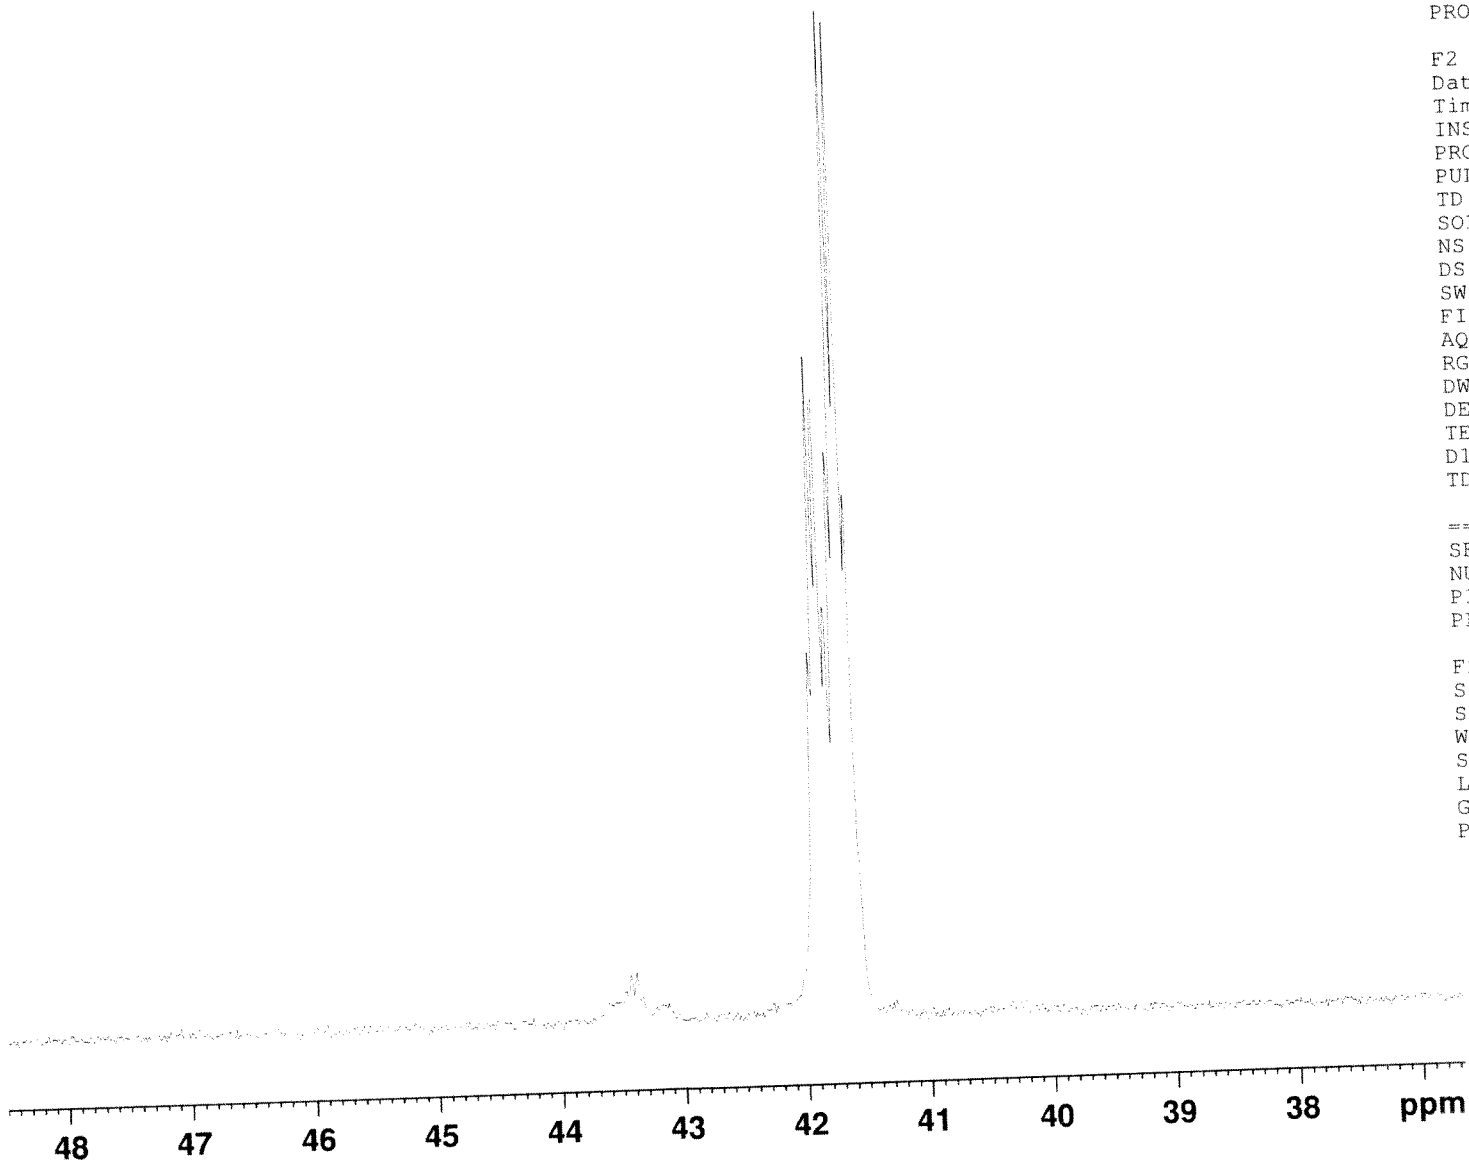

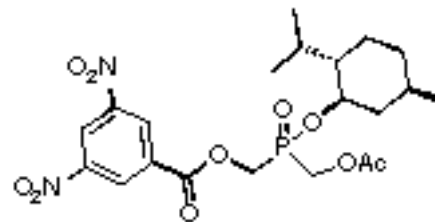

Compound 46  
 $^{31}\text{P}/^1\text{H}$  NMR decoupled

Current Data Parameters  
 NAME OB 1474 recryst toluene  
 EXPNO 1  
 PROCNO 1

F2 - Acquisition Parameters  
 Date\_ 20140708  
 Time 18.51  
 INSTRUM spect  
 PROBHD 5 mm BBI 1H/D-  
 PULPROG zgpg30  
 TD 65536  
 SOLVENT CDCl3  
 NS 16  
 DS 4  
 SWH 64102.563 Hz  
 FIDRES 0.978127 Hz  
 AQ 0.5111808 sec  
 RG 203.57  
 DW 7.800 usec  
 DE 6.50 usec  
 TE 294.0 K  
 D1 2.00000000 sec  
 D11 0.03000000 sec  
 TD0 1

==== CHANNEL f1 =====  
 SFO1 161.9674942 MHz  
 NUC1  $^{31}\text{P}$   
 P1 14.44 usec  
 PLW1 50.00000000 W

==== CHANNEL f2 =====  
 SFO2 400.1316005 MHz  
 NUC2  $^1\text{H}$   
 CPDPRG[2] waltz16  
 PCPD2 90.00 usec  
 PLW2 20.00000000 W  
 PLW12 0.07200000 W  
 PLW13 0.05832000 W

F2 - Processing parameters  
 SI 32768  
 SF 161.9755930 MHz  
 WDW EM  
 SSB 0  
 LB 1.00 Hz  
 GB 0  
 PC 1.40

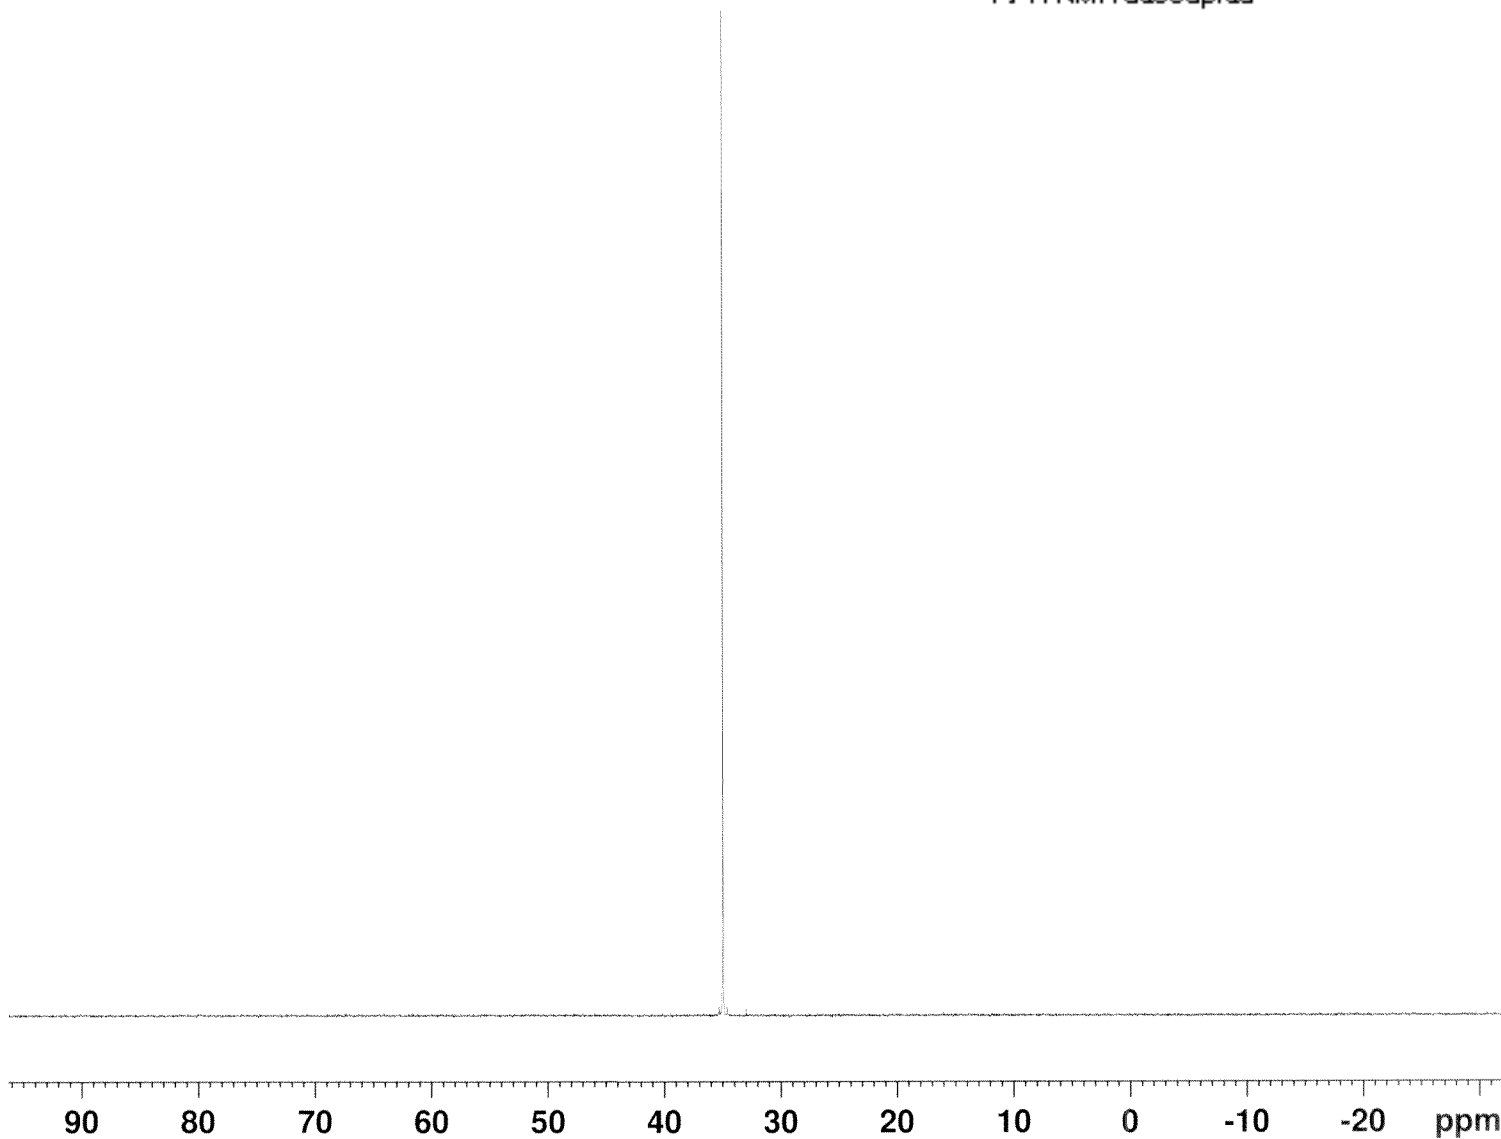

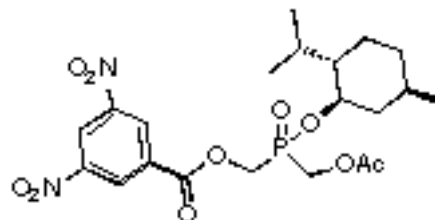

Compound 46  
<sup>31</sup>P/<sup>1</sup>H NMR coupled

Current Data Parameters  
 NAME OB 1474 recryst toluene  
 EXPNO 2  
 PROCNO 1

F2 - Acquisition Parameters  
 Date\_ 20140708  
 Time 18.52  
 INSTRUM spect  
 PROBHD 5 mm BBI 1H/D-  
 PULPROG zg30  
 TD 65536  
 SOLVENT CDCl3  
 NS 8  
 DS 4  
 SWH 64102.563 Hz  
 FIDRES 0.978127 Hz  
 AQ 0.5111808 sec  
 RG 203.57  
 DW 7.800 usec  
 DE 6.50 usec  
 TE 294.0 K  
 D1 2.00000000 sec  
 TDO 1

===== CHANNEL f1 =====  
 SFO1 161.9674942 MHz  
 NUC1 31P  
 P1 14.44 usec  
 PLW1 50.00000000 W

F2 - Processing parameters  
 SI 32768  
 SF 161.9755930 MHz  
 WDW EM  
 SSB 0  
 LB 1.00 Hz  
 GB 0  
 PC 1.40

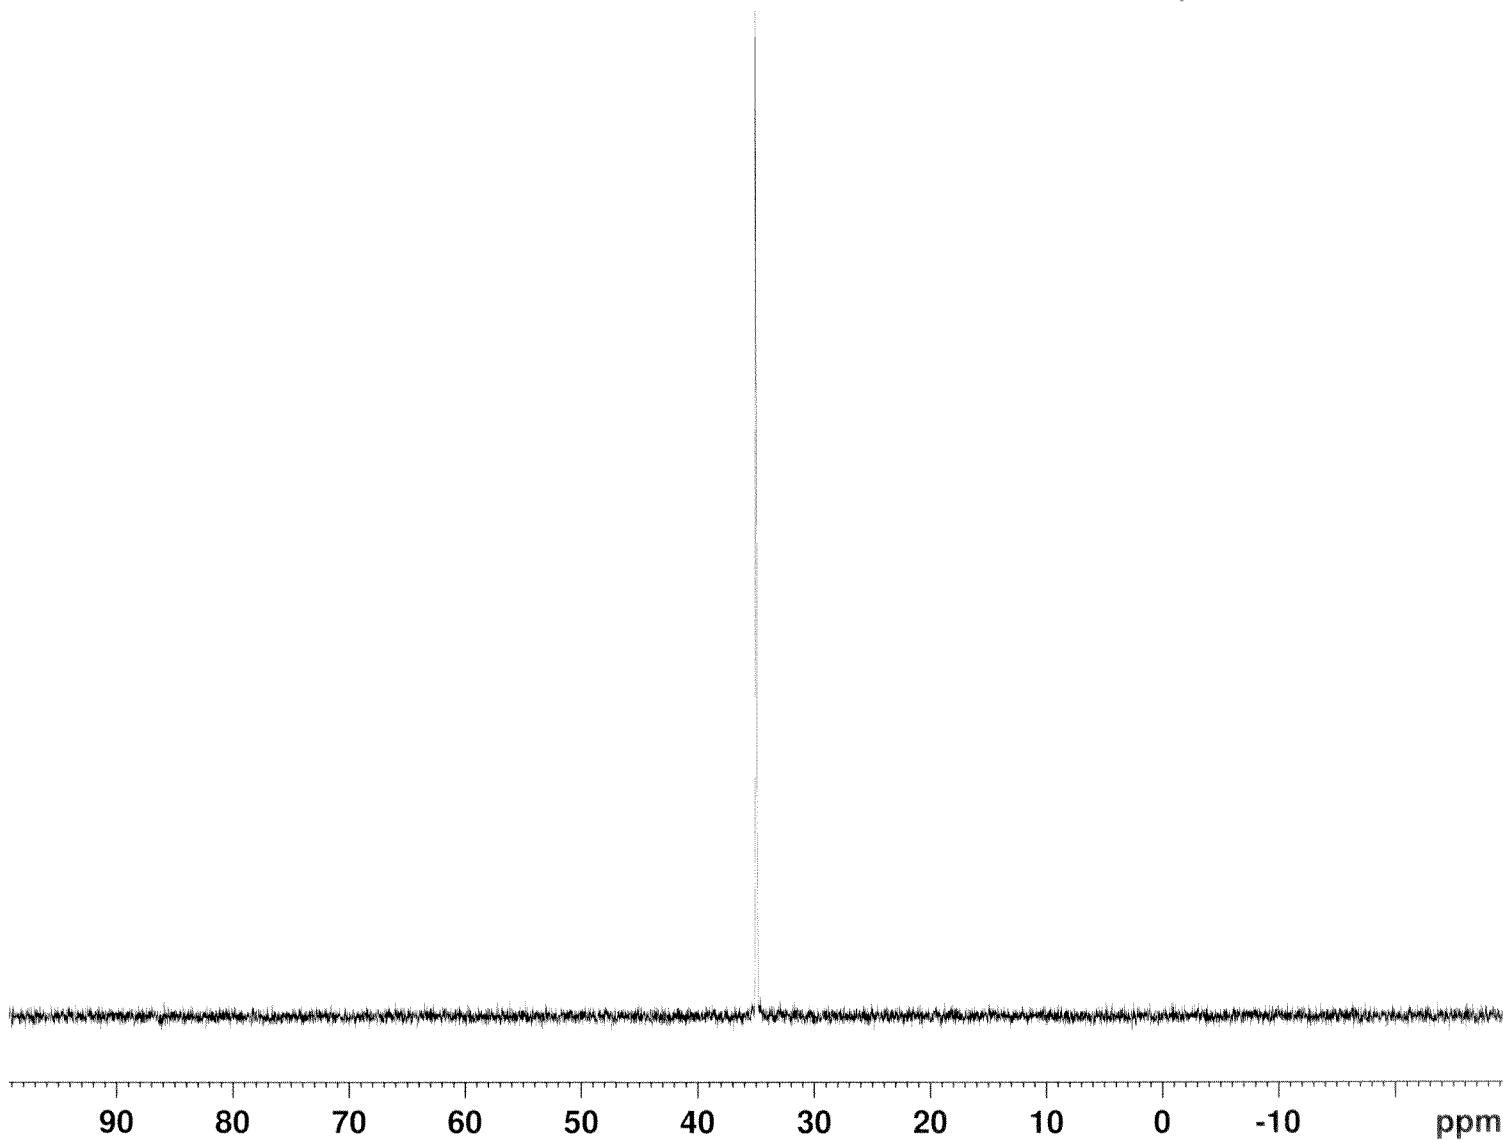

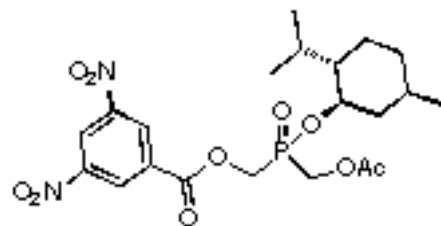

Compound 46  
<sup>1</sup>H NMR

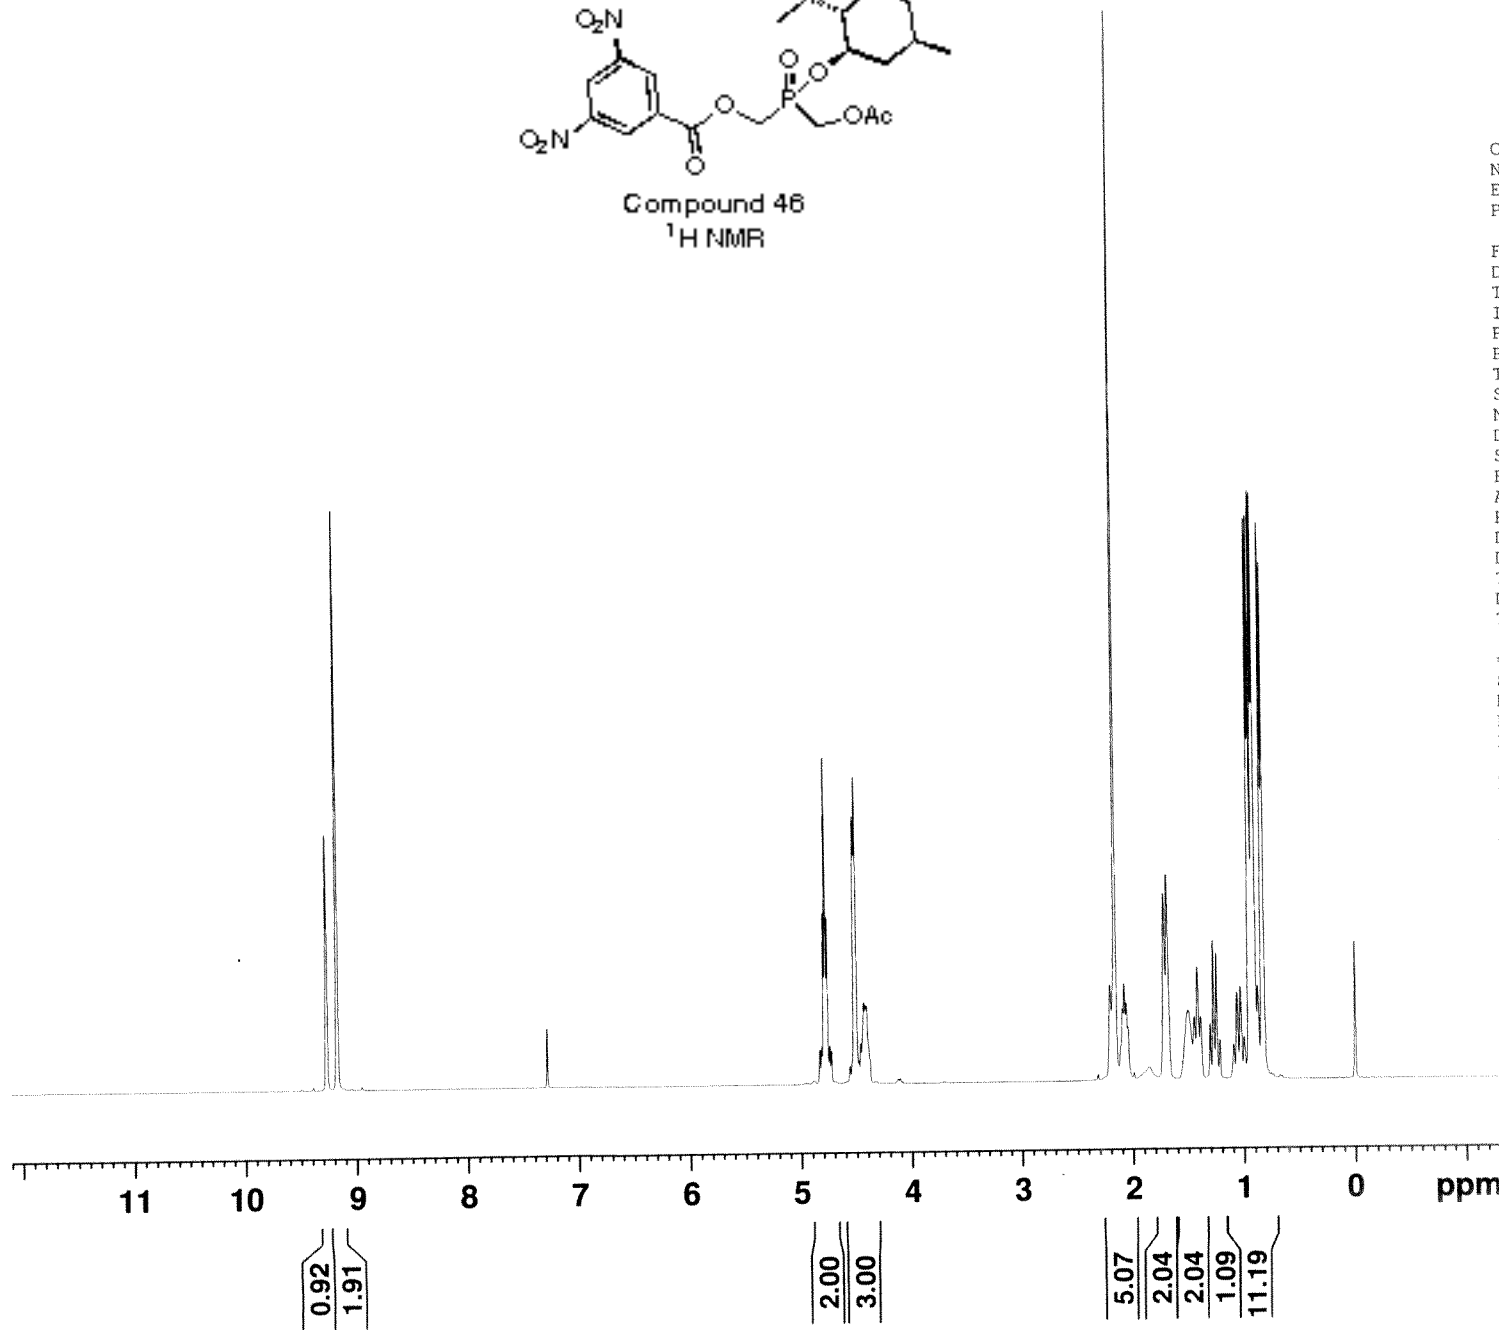

Current Data Parameters  
 NAME OB 1474 recryst toluene  
 EXPNO 3  
 PROCNO 1

F2 - Acquisition Parameters  
 Date\_ 20140708  
 Time 18.57  
 INSTRUM spect  
 PROBHD 5 mm BBI 1H/D-  
 PULPROG zg30  
 TD 65536  
 SOLVENT CDCl3  
 NS 16  
 DS 2  
 SWH 8012.820 Hz  
 FIDRES 0.122266 Hz  
 AQ 4.0894465 sec  
 RG 32.38  
 DW 62.400 usec  
 DE 6.50 usec  
 TE 294.0 K  
 D1 1.0000000 sec  
 TD0 1

===== CHANNEL f1 =====  
 SF01 400.1324710 MHz  
 NUC1 1H  
 P1 5.75 usec  
 PLW1 20.0000000 W

F2 - Processing parameters  
 SI 65536  
 SF 400.1300000 MHz  
 WDW EM  
 SSB 0  
 LB 0.30 Hz  
 GB 0  
 PC 1.00

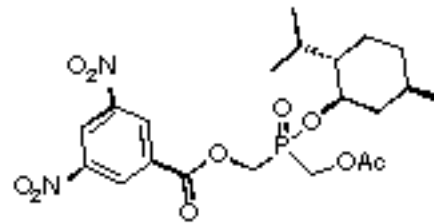

Compound 46  
<sup>13</sup>C NMR

Current Data Parameters  
 NAME OB 1474 recryst toluene  
 EXPNO 4  
 PROCNO 1

F2 - Acquisition Parameters  
 Date\_ 20140708  
 Time 19.28  
 INSTRUM spect  
 PROBHD 5 mm BBI 1H/D-  
 PULPROG zgpg30  
 TD 65536  
 SOLVENT CDCl3  
 NS 517  
 DS 4  
 SWH 24038.461 Hz  
 FIDRES 0.366798 Hz  
 AQ 1.3631488 sec  
 RG 203.57  
 DW 20.800 usec  
 DE 6.50 usec  
 TE 294.0 K  
 D1 2.00000000 sec  
 D11 0.03000000 sec  
 TD0 1

==== CHANNEL f1 =====  
 SFO1 100.6228293 MHz  
 NUC1 13C  
 P1 12.95 usec  
 PLW1 100.00000000 W

==== CHANNEL f2 =====  
 SFO2 400.1316005 MHz  
 NUC2 1H  
 CPDPRG[2] waltz16  
 PCPD2 90.00 usec  
 PLW2 20.00000000 W  
 PLW12 0.07200000 W  
 PLW13 0.05832000 W

F2 - Processing parameters  
 SI 32768  
 SF 100.6127685 MHz  
 WDW EM  
 SSB 0  
 LB 1.00 Hz  
 GB 0  
 PC 1.40

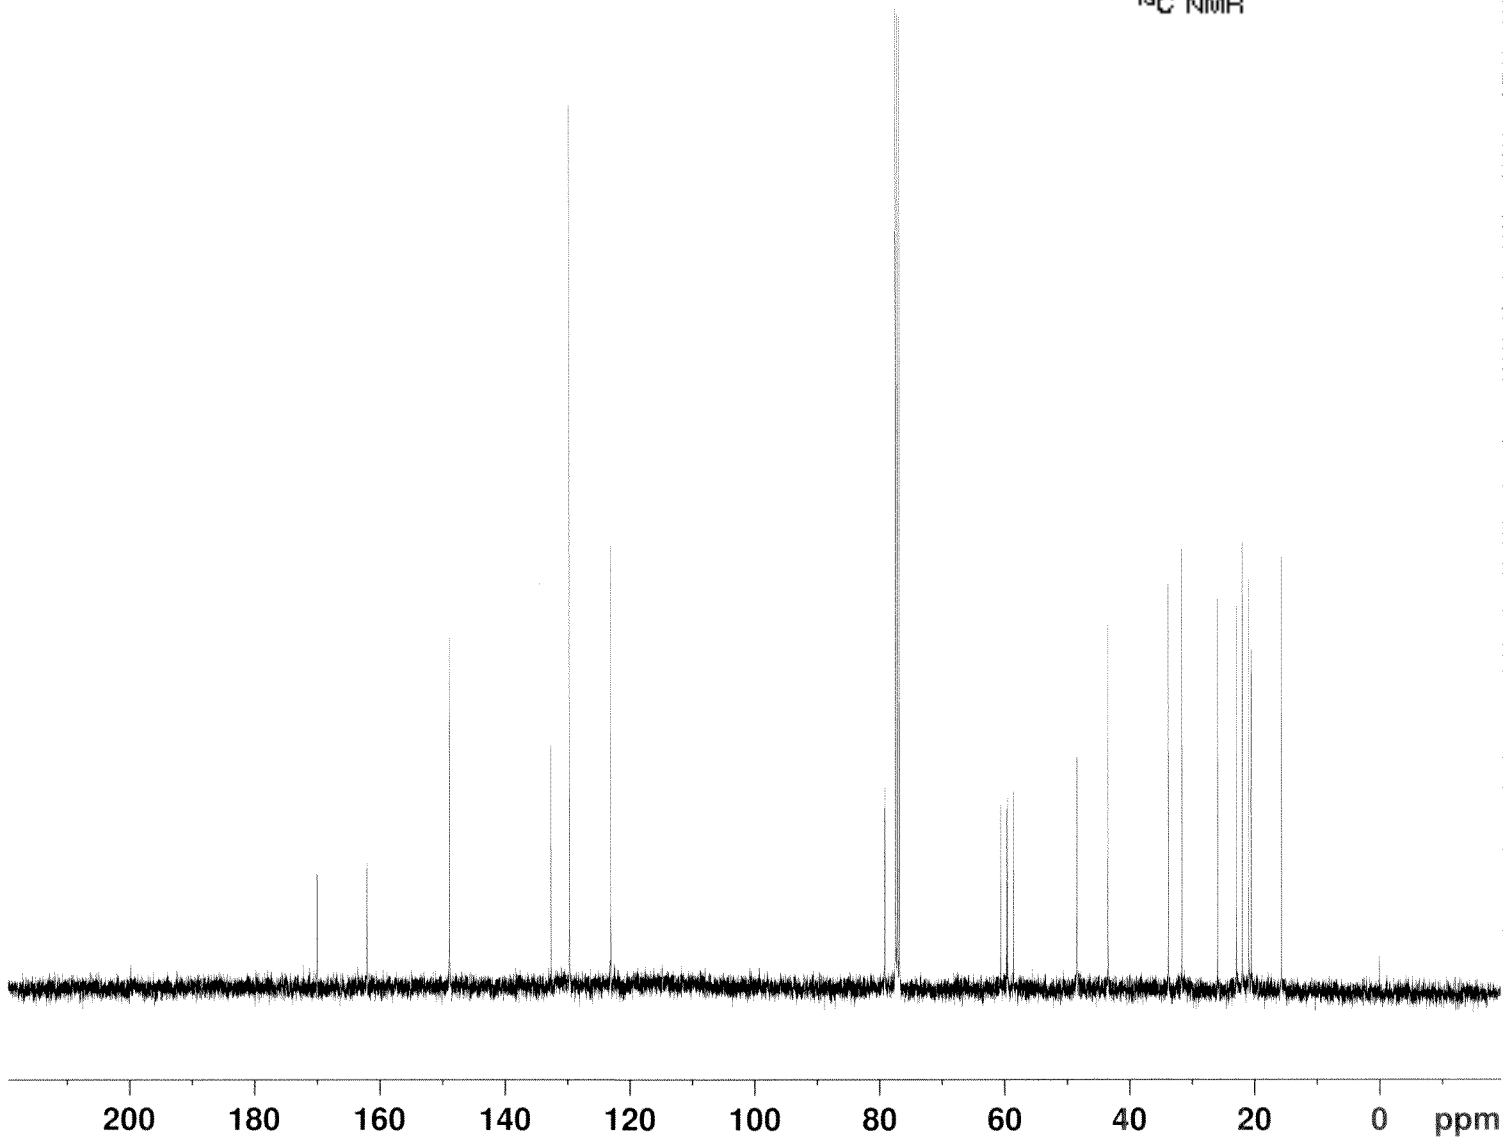

Supplement: c6ob01413e1.pdf [file c6ob01413e1.pdf]
